# Supplementary material for: Peptidylarginine deiminase 2 citrullinates MZB1 and promotes the secretion of IgM and IgA
Source: PubMed Central journal article supplement (PMC10716219; doi:10.3389/fimmu.2023.1290585), 2023-11-29
Supplement: DataSheet_1.pdf [file DataSheet_1.pdf]

Supplemental Table 1: The sequence of qPCR primers

| Regular qPCR primers                           |                                    |                                |
|------------------------------------------------|------------------------------------|--------------------------------|
| Gene                                           | Forward                            | Reverse                        |
| hPAD1                                          | 5'-CCTCACTGGCGTCGATATTT-3'         | 5'-TCACAGTTCACCAGCAAGATAG-3'   |
| hPAD2                                          | 5'-GGTCAGCCATATCCATCTTCTC-3'       | 5'-GACAGATGGCACCAGGAATAA-3'    |
| hPAD3                                          | 5'-GGCCAAGATAAGGTGTCCTATG-3'       | 5'-CAGAGTGACATGGAAGGAGATG-3'   |
| hPAD4                                          | 5'-CCCTCCAGCCAAGAAGAAAT-3'         | 5'-AGTCTTGGGTCCGTAGTATGA-3'    |
| hPAD6                                          | 5'-GCAGATCAGCTCCTGTCTAATG-3'       | 5'-TGAATGCACTTCTCCACGTATT-3'   |
| hMZB1                                          | 5'-GGCAGGACTACGGAGTTCGAGAAG-3'     | 5'-TTCTCCAAACTCCCCAAGTAGTG-3'  |
| hACTIN                                         | 5'-GTGACAGCAGTCGGTTGGAG-3'         | 5'-AGGACTGGGCCATTCTCCTT-3'     |
| hGAPDH                                         | 5'-AGGTGAAGGTTCGGAGTCAACG-3'       | 5'-GATGACAAGCTTCCCGTTCTCAG-3'  |
| qPCR primers for determining CRISPR efficiency |                                    |                                |
| Gene                                           | Forward                            | Reverse                        |
| hPAD2                                          | 5'-ATGTCTACAGCGCGCCCCAGCCG-3'      | 5'-CTTGTCAGTCTGGCCTCGGTGCT-3'  |
| hPAD4                                          | 5'-GACTCAGCTTGACATCTGCAGCTC-3'     | 5'-ATGAAATCTGAACCTTCTGGTCGC-3' |
| hMZB1                                          | 5- AGTGGACCAAGTGAACGTCTCAC -<br>3' | 5- TTCTCCAAACTCCCCAAGTAGTG -3' |
