# Supplementary material for: Peptidylarginine deiminase 2 citrullinates MZB1 and promotes the secretion of IgM and IgA
Source: PubMed Central journal article supplement (PMC10716219; doi:10.3389/fimmu.2023.1290585), 2023-11-29
Supplement: DataSheet_2.pdf [file DataSheet_2.pdf]

Supplemental Table 2: Sequences of CRISPR sgRNAs

|       |                      |
|-------|----------------------|
| hCD4  | UUUAAGCACGACUCUGCAGA |
| hCD19 | CACAGCGUUAUCUCCCUCUG |
| hPAD2 | CCACAGCGCGGCCCCAGCCG |
| hPAD4 | GAAGGACGUGCAGUCCUCAG |
| hMZB1 | CAGCUACGGAGUUCGAGAAG |
