# Supplementary material for: Peptidylarginine deiminase 2 citrullinates MZB1 and promotes the secretion of IgM and IgA
Source: PubMed Central journal article supplement (PMC10716219; doi:10.3389/fimmu.2023.1290585), 2023-11-29
Supplement: DataSheet_3.pdf [file DataSheet_3.pdf]

### Supplemental table 3: RA-ILD1 vs controls

| Accession #             | Fold Change | p value (-log10) |
|-------------------------|-------------|------------------|
| sp Q15109-10 RAGE_HUMAN | -1.4849911  | 1.6997428        |
| sp P22748 CAH4_HUMAN    | -1.2166309  | 2.1818786        |
| sp P59666 DEF3_HUMAN    | -0.8102055  | 2.1818786        |
| sp P08174-3 DAF_HUMAN   | -0.6758537  | 1.6960104        |
| sp P05164-3 PERM_HUMAN  | -0.6667957  | 8.726646         |
| sp P01011 AACT_HUMAN    | -0.6346245  | 6.6933327        |
| sp P12429 ANXA3_HUMAN   | -0.6327896  | 7.6602716        |
| sp P50897-2 PPT1_HUMAN  | -0.6278381  | 1.6960104        |
| sp P62805 H4_HUMAN      | -0.5995846  | 6.3204336        |
| sp P80188 NGAL_HUMAN    | -0.5571365  | 1.6092666        |
| sp P12821-2 ACE_HUMAN   | -0.5417194  | 2.151766         |
| sp P60903 S10AA_HUMAN   | -0.539362   | 1.6960104        |
| sp Q01469 FABP5_HUMAN   | -0.4978695  | 4.534284         |
| sp P07339 CATD_HUMAN    | -0.466135   | 7.044066         |
| sp P26006-1 ITA3_HUMAN  | -0.4449863  | 2.8793902        |
| sp Q9NZA1-2 CLIC5_HUMAN | -0.4436836  | 2.5461748        |
| sp P08311 CATG_HUMAN    | -0.4411736  | 2.838374         |
| sp P16284-3 PECA1_HUMAN | -0.4323654  | 4.0434685        |
| sp P61626 LYSC_HUMAN    | -0.4291267  | 2.8384566        |
| sp Q9UGT4 SUSD2_HUMAN   | -0.422863   | 2.058973         |
| sp P02769 ALBU_BOVIN    | -0.4188442  | 6.464415         |
| sp O95810 CAVN2_HUMAN   | -0.4095364  | 2.653196         |
| sp P02462 CO4A1_HUMAN   | -0.4016218  | 1.4278674        |
| sp Q9Y624 JAM1_HUMAN    | -0.3983898  | 1.9413493        |
| sp P50895 BCAM_HUMAN    | -0.3900127  | 4.005173         |
| sp P35241 RADI_HUMAN    | -0.3824883  | 1.9190748        |
| sp P11047 LAMC1_HUMAN   | -0.368084   | 4.1101046        |
| sp O00159 MYO1C_HUMAN   | -0.3436394  | 4.488742         |
| sp P10253 LYAG_HUMAN    | -0.3214264  | 3.5908275        |
| sp P84103-2 SRSF3_HUMAN | -0.3206997  | 1.3635377        |
| sp Q13510-2 ASAH1_HUMAN | -0.3182621  | 4.146542         |
| sp P56199 ITA1_HUMAN    | -0.3035851  | 4.0218377        |
| sp P02786 TFR1_HUMAN    | -0.3028202  | 1.8842831        |
| sp Q13740-2 CD166_HUMAN | -0.2930183  | 1.6797456        |
| sp P14543-2 NID1_HUMAN  | -0.2909279  | 2.5617142        |
| sp Q9UHG3 PCYOX_HUMAN   | -0.2907658  | 3.3983748        |
| sp P51659 DHB4_HUMAN    | -0.2898865  | 1.3815327        |
| sp Q8NBQ5 DHB11_HUMAN   | -0.2863827  | 1.9413493        |
| sp POCG47 UBB_HUMAN     | -0.2799454  | 1.9951487        |
| sp P84243 H33_HUMAN     | -0.2711144  | 1.6960104        |
| sp P55268 LAMB2_HUMAN   | -0.2685852  | 3.1110814        |
| sp P05556 ITB1_HUMAN    | -0.2590523  | 2.7528272        |
| sp P00352 AL1A1_HUMAN   | -0.2516193  | 1.4067543        |

|                         |            |           |
|-------------------------|------------|-----------|
| sp P07858 CATB_HUMAN    | -0.2434006 | 1.6853416 |
| sp P05026-2 AT1B1_HUMAN | -0.2374115 | 1.560883  |
| sp Q6NZI2 CAVN1_HUMAN   | -0.2358055 | 2.1004598 |
| sp P31949 S10AB_HUMAN   | -0.2310772 | 2.4829872 |
| sp P10412 H14_HUMAN     | -0.2092686 | 1.6092666 |
| sp Q01082 SPTB2_HUMAN   | -0.1629105 | 1.3056548 |
| sp P21810 PGS1_HUMAN    | -0.1581726 | 1.804513  |
| sp P43652 AFAM_HUMAN    | -0.1481495 | 2.3424563 |
| sp P23141-3 EST1_HUMAN  | 0.09622192 | 1.6817658 |
| sp Q03252 LMNB2_HUMAN   | 0.1172657  | 2.5059617 |
| sp P22626 ROA2_HUMAN    | 0.12138367 | 1.3403429 |
| sp Q07955-2 SRSF1_HUMAN | 0.16879654 | 1.3481187 |
| sp P02768 ALBU_HUMAN    | 0.17430878 | 6.4079614 |
| sp P04040 CATA_HUMAN    | 0.18007088 | 2.157161  |
| sp P07988 PSPB_HUMAN    | 0.18580627 | 2.4945192 |
| sp P02749 APOH_HUMAN    | 0.1886177  | 1.827201  |
| sp Q08380 LG3BP_HUMAN   | 0.2004242  | 1.7703108 |
| sp Q07065 CKAP4_HUMAN   | 0.20416069 | 1.7865183 |
| sp P35908 K22E_HUMAN    | 0.22387695 | 6.1391983 |
| sp Q96AG4 LRC59_HUMAN   | 0.22819138 | 1.4278674 |
| sp P20700 LMNB1_HUMAN   | 0.22917938 | 6.4130163 |
| sp P04217 A1BG_HUMAN    | 0.2332077  | 1.5071542 |
| sp Q9UL46 PSME2_HUMAN   | 0.23475456 | 2.7624686 |
| sp P15088 CBPA3_HUMAN   | 0.23485565 | 1.6997428 |
| sp P0DOY2 IGLC2_HUMAN   | 0.2370243  | 1.3815327 |
| sp P0DOX5 IGG1_HUMAN    | 0.23784065 | 1.5121045 |
| sp P00450 CERU_HUMAN    | 0.2545414  | 3.274217  |
| sp P02730 B3AT_HUMAN    | 0.25569534 | 3.364204  |
| sp P45974-2 UBP5_HUMAN  | 0.26000977 | 1.662449  |
| sp P35749-4 MYH11_HUMAN | 0.26433372 | 4.355441  |
| sp P01833 PIGR_HUMAN    | 0.26675797 | 3.8058946 |
| sp P0DOX8 IGL1_HUMAN    | 0.26750183 | 1.6997428 |
| sp P51911 CNN1_HUMAN    | 0.2717781  | 1.3211795 |
| sp P61978-3 HNRPK_HUMAN | 0.28123093 | 2.3420908 |
| sp P02549-2 SPTA1_HUMAN | 0.28153992 | 4.4263687 |
| sp P22105-1 TENX_HUMAN  | 0.28668213 | 6.682845  |
| sp P13645 K1C10_HUMAN   | 0.291193   | 8.18605   |
| sp P23456 Trypsin       | 0.2934265  | 2.441399  |
| sp O15061-2 SYNEM_HUMAN | 0.30245972 | 2.2323174 |
| sp P15090 FABP4_HUMAN   | 0.30282974 | 2.6997027 |
| sp P02774-3 VTDB_HUMAN  | 0.30657387 | 5.736467  |
| sp P07951 TPM2_HUMAN    | 0.308424   | 1.321681  |
| sp P51888 PRELP_HUMAN   | 0.31163025 | 2.8435178 |
| sp Q15746-3 MYLK_HUMAN  | 0.3164673  | 3.2507055 |
| sp Q14315-2 FLNC_HUMAN  | 0.3172512  | 6.63471   |

|                         |            |           |
|-------------------------|------------|-----------|
| sp P00747 PLMN_HUMAN    | 0.3202095  | 2.2522726 |
| sp P31146 COR1A_HUMAN   | 0.32240677 | 1.4236159 |
| sp Q9BXN1 ASPN_HUMAN    | 0.32358932 | 1.3815327 |
| sp P35527 K1C9_HUMAN    | 0.32535744 | 3.7723744 |
| sp Q07507 DERM_HUMAN    | 0.3278618  | 1.9509854 |
| sp P08729 K2C7_HUMAN    | 0.33331108 | 3.9572785 |
| sp Q06323 PSME1_HUMAN   | 0.33463097 | 2.6576471 |
| sp P05455 LA_HUMAN      | 0.33516312 | 1.5121045 |
| sp P20591 MX1_HUMAN     | 0.33783722 | 1.4104178 |
| sp Q14624-2 ITIH4_HUMAN | 0.33802986 | 3.125233  |
| sp P69891 HBG1_HUMAN    | 0.3394966  | 2.4829872 |
| sp Q13263 TIF1B_HUMAN   | 0.34016037 | 1.9697601 |
| sp P80303-2 NUCB2_HUMAN | 0.34031868 | 1.7590232 |
| sp Q9P2E9 RRBP1_HUMAN   | 0.3441429  | 3.5386477 |
| sp P00734 THRБ_HUMAN    | 0.3480358  | 3.0495367 |
| sp Q14019 COTL1_HUMAN   | 0.3601284  | 2.8384566 |
| sp P01861 IGHG4_HUMAN   | 0.36026    | 1.9951487 |
| sp P00492 HPRT_HUMAN    | 0.36094475 | 1.5646582 |
| sp P13647 K2C5_HUMAN    | 0.36424446 | 4.964395  |
| sp O96000-2 NDUBA_HUMAN | 0.3657608  | 1.4104178 |
| sp P61254 RL26_HUMAN    | 0.36811447 | 1.7590232 |
| sp P19823 ITIH2_HUMAN   | 0.3681984  | 4.628043  |
| sp P11277-3 SPTB1_HUMAN | 0.37147903 | 2.2752137 |
| sp P28331-3 NDUS1_HUMAN | 0.38436508 | 1.3561004 |
| sp P30837 AL1B1_HUMAN   | 0.38653946 | 1.560883  |
| sp P21266 GSTM3_HUMAN   | 0.39004135 | 2.0272346 |
| sp P13671 CO6_HUMAN     | 0.39025116 | 1.9975306 |
| sp P01024 CO3_HUMAN     | 0.39404106 | 15.176438 |
| sp O15127 SCAM2_HUMAN   | 0.39644623 | 1.6960104 |
| sp P01008 ANT3_HUMAN    | 0.39755058 | 3.5678737 |
| sp P01023 A2MG_HUMAN    | 0.4022045  | 7.3725133 |
| sp Q14767 LTBP2_HUMAN   | 0.40995407 | 4.717375  |
| sp O75937 DNJC8_HUMAN   | 0.42467117 | 2.1818786 |
| sp P13716-2 HEM2_HUMAN  | 0.43418312 | 1.6832623 |
| sp P04264 K2C1_HUMAN    | 0.4428978  | 12.437526 |
| sp Q9UBX5 FBLN5_HUMAN   | 0.4511795  | 2.6576471 |
| sp Q8N2S1-3 LTBP4_HUMAN | 0.45837402 | 2.4402673 |
| sp P67936-2 TPM4_HUMAN  | 0.4607849  | 1.6997428 |
| sp P02766 TTHY_HUMAN    | 0.4621868  | 1.3815327 |
| sp P04196 HRG_HUMAN     | 0.4672985  | 2.987788  |
| sp P07451 CAH3_HUMAN    | 0.469553   | 1.827201  |
| sp P01876 IGHA1_HUMAN   | 0.4720955  | 3.0251918 |
| sp P09493-8 TPM1_HUMAN  | 0.47280884 | 2.432837  |
| sp Q01995 TAGL_HUMAN    | 0.49588966 | 4.6997666 |
| sp P08670 VIME_HUMAN    | 0.498312   | 14.423111 |

|                         |            |            |
|-------------------------|------------|------------|
| sp P05546 HEP2_HUMAN    | 0.50211525 | 2.4982266  |
| sp P01042-2 KNG1_HUMAN  | 0.5089836  | 4.7071037  |
| sp Q9UMS6-2 SYNP2_HUMAN | 0.5150337  | 2.653196   |
| sp P08603 CFAH_HUMAN    | 0.5193043  | 13.473147  |
| sp P08727 K1C19_HUMAN   | 0.5260792  | 5.644248   |
| sp Q15102 PA1B3_HUMAN   | 0.52825356 | 1.7590232  |
| sp P07585 PGS2_HUMAN    | 0.5282879  | 4.4994555  |
| sp P30043 BLVRB_HUMAN   | 0.5303421  | 1.3815327  |
| sp P00918 CAH2_HUMAN    | 0.530674   | 4.534284   |
| sp Q96PD5-2 PGRP2_HUMAN | 0.53073883 | 1.6960104  |
| sp P29622 KAIN_HUMAN    | 0.55370903 | 2.1818786  |
| sp P19827 ITIH1_HUMAN   | 0.56381035 | 1.827201   |
| sp P06727 APOA4_HUMAN   | 0.57061386 | 5.523198   |
| sp P20774 MIME_HUMAN    | 0.59256077 | 3.3668416  |
| sp P09493-9 TPM1_HUMAN  | 0.6567993  | 1.6960104  |
| sp P51884 LUM_HUMAN     | 0.65681076 | 7.7561703  |
| sp P31947-2 1433S_HUMAN | 0.67071915 | 1.4716977  |
| sp P07738 PMGE_HUMAN    | 0.6928406  | 2.1818786  |
| sp Q15063-3 POSTN_HUMAN | 0.70222855 | 6.936907   |
| sp P05783 K1C18_HUMAN   | 0.71536255 | 8.532816   |
| sp Q8WU39 MZB1_HUMAN    | 0.72480774 | 1.6960104  |
| sp P32119 PRDX2_HUMAN   | 0.74201584 | 4.964395   |
| sp P27169 PON1_HUMAN    | 0.87080765 | 1.6960104  |
| sp P04114 APOB_HUMAN    | 0.93634224 | 11.791697  |
| sp Q05707-2 COEA1_HUMAN | 0.941391   | 14.875408  |
| sp P17661 DESM_HUMAN    | 0.99001694 | 14.675837  |
| sp P00915 CAH1_HUMAN    | 1.0056343  | 6.253077   |
| sp P02042 HBD_HUMAN     | 1.022974   | 3.5908275  |
| sp P02647 APOA1_HUMAN   | 1.1238194  | 13.320112  |
| sp P02652 APOA2_HUMAN   | 1.2140732  | 2.9807727  |
| sp P68871 HBB_HUMAN     | 1.3070164  | 4.051346   |
| sp P08123 CO1A2_HUMAN   | 1.4247503  | 2.6576471  |
| sp P02452 CO1A1_HUMAN   | 1.4977016  | 2.1800864  |
| sp P69905 HBA_HUMAN     | 1.5590076  | 3.5908275  |
| sp P04229 2B11_HUMAN    | -2.6177425 | 0.7827403  |
| sp Q04826 1B40_HUMAN    | -2.2847443 | 0.656254   |
| sp P13761 2B17_HUMAN    | -1.9574509 | 0.656254   |
| sp P13760 2B14_HUMAN    | -1.4635582 | 0.91601294 |
| sp P08246 ELNE_HUMAN    | -1.156393  | 1.1932944  |
| sp P10316 1A69_HUMAN    | -1.0575752 | 0.656254   |
| sp P25815 S100P_HUMAN   | -0.8416023 | 0.656254   |
| sp P30453 1A34_HUMAN    | -0.7585144 | 0.656254   |
| sp Q03135-2 CAV1_HUMAN  | -0.7307243 | 0.656254   |
| sp P41218 MNDA_HUMAN    | -0.6715603 | 0.7588735  |
| sp P49913 CAMP_HUMAN    | -0.6248436 | 1.1932944  |

|                         |            |            |
|-------------------------|------------|------------|
| sp P15559-3 NQO1_HUMAN  | -0.571106  | 0.91601294 |
| sp Q14956-2 GPNMB_HUMAN | -0.5528946 | 1.1932944  |
| sp Q96AP7 ESAM_HUMAN    | -0.5377541 | 0.7827403  |
| sp Q9BXM0 PRAX_HUMAN    | -0.5347652 | 0.45033538 |
| sp Q92522 H1X_HUMAN     | -0.4904251 | 1.1932944  |
| sp Q07075 AMPE_HUMAN    | -0.4777718 | 0.5204253  |
| sp P13686 PPA5_HUMAN    | -0.4512615 | 0.7061832  |
| sp P37235 HPCL1_HUMAN   | -0.4495316 | 0.656254   |
| sp P00167-2 CYB5_HUMAN  | -0.4426498 | 0.7061832  |
| sp P55290-4 CAD13_HUMAN | -0.4328804 | 0.7061832  |
| sp Q10589-2 BST2_HUMAN  | -0.4305191 | 1.1932944  |
| sp Q9NZN3 EHD3_HUMAN    | -0.3933554 | 0.7061832  |
| sp Q9NPY3 C1QR1_HUMAN   | -0.3917694 | 0.97209185 |
| sp P06703 S10A6_HUMAN   | -0.3906746 | 0.35795313 |
| sp P63218 GBG5_HUMAN    | -0.3845348 | 0.97209185 |
| sp P24158 PRTN3_HUMAN   | -0.3808861 | 0.7061832  |
| sp O95716 RAB3D_HUMAN   | -0.3805027 | 0.656254   |
| sp P04908 H2A1B_HUMAN   | -0.3765888 | 0.656254   |
| sp P18428 LBP_HUMAN     | -0.3648052 | 0.7588735  |
| sp P16671-4 CD36_HUMAN  | -0.3615761 | 0.8983557  |
| sp P09758 TACD2_HUMAN   | -0.356247  | 1.120602   |
| sp Q03135 CAV1_HUMAN    | -0.352932  | 0.6298893  |
| sp O95837 GNA14_HUMAN   | -0.3483887 | 0.656254   |
| sp P33151 CADH5_HUMAN   | -0.3418236 | 0.35795313 |
| sp P02743 SAMP_HUMAN    | -0.3396702 | 0.37060758 |
| sp Q16777 H2A2C_HUMAN   | -0.3395596 | 0.656254   |
| sp P51153 RAB13_HUMAN   | -0.3281403 | 0          |
| sp P02750 A2GL_HUMAN    | -0.3270435 | 0.65625405 |
| sp P49407-2 ARRB1_HUMAN | -0.3249893 | 0.8059303  |
| sp P20160 CAP7_HUMAN    | -0.324501  | 1.1505735  |
| sp Q8WWI1-5 LMO7_HUMAN  | -0.3186894 | 0.45720983 |
| sp P99999 CYC_HUMAN     | -0.3171883 | 0.52598757 |
| sp P25774 CATS_HUMAN    | -0.3110886 | 0.7827403  |
| sp Q99715-4 COCA1_HUMAN | -0.3090267 | 0.69308156 |
| sp Q9H8H3 MET7A_HUMAN   | -0.3041687 | 0          |
| sp Q53FA7 QORX_HUMAN    | -0.3010483 | 0.19149946 |
| sp P09429 HMGB1_HUMAN   | -0.3004284 | 0.45033538 |
| sp O43615 TIM44_HUMAN   | -0.2971563 | 0.45033538 |
| sp P20702 ITAX_HUMAN    | -0.2964859 | 0.312067   |
| sp P09601 HMOX1_HUMAN   | -0.2961636 | 1.0301651  |
| sp P06753 TPM3_HUMAN    | -0.2957573 | 0.656254   |
| sp P05109 S10A8_HUMAN   | -0.2935581 | 0          |
| sp P11233 RALA_HUMAN    | -0.2903061 | 0.35795313 |
| sp P62070-4 RRAS2_HUMAN | -0.2899017 | 0          |
| sp Q08722-2 CD47_HUMAN  | -0.2858563 | 0.7061832  |

|                         |            |            |
|-------------------------|------------|------------|
| sp Q6P4A8 PLBL1_HUMAN   | -0.2758942 | 0.5204253  |
| sp P23229-4 ITA6_HUMAN  | -0.2708569 | 0          |
| sp P11279 LAMP1_HUMAN   | -0.2640305 | 1.1932944  |
| sp Q9UBR2 CATZ_HUMAN    | -0.2583561 | 0          |
| sp Q15286-2 RAB35_HUMAN | -0.2580032 | 0          |
| sp Q9UM07 PADI4_HUMAN   | -0.2550411 | 0.5204253  |
| sp P33121-3 ACSL1_HUMAN | -0.2547607 | 0.6509351  |
| sp Q9H223 EHD4_HUMAN    | -0.2436485 | 0.9847622  |
| sp P07910-2 HNRPC_HUMAN | -0.2431908 | 1.1791906  |
| sp Q9NX46 ARHL2_HUMAN   | -0.2430897 | 0.45033538 |
| sp P43304 GPDM_HUMAN    | -0.2405071 | 0.26737198 |
| sp P13498 CY24A_HUMAN   | -0.2403488 | 0.45033538 |
| sp P11215-2 ITAM_HUMAN  | -0.239502  | 0.65625405 |
| sp P01009 A1AT_HUMAN    | -0.2387085 | 1.0809385  |
| sp P56134-3 ATPK_HUMAN  | -0.2385349 | 0          |
| sp Q9UBQ0-2 VPS29_HUMAN | -0.2363052 | 0.45033538 |
| sp P28676 GRAN_HUMAN    | -0.2357407 | 0.1342476  |
| sp P17213 BPI_HUMAN     | -0.2332134 | 0          |
| sp P21397 AOFA_HUMAN    | -0.2287598 | 0.34853485 |
| sp Q92747 ARC1A_HUMAN   | -0.2270966 | 0          |
| sp Q15126 PMVK_HUMAN    | -0.220541  | 0.45033538 |
| sp Q02318 CP27A_HUMAN   | -0.2205219 | 0          |
| sp Q9H2U2-2 IPYR2_HUMAN | -0.2185535 | 0.19149946 |
| sp P05107 ITB2_HUMAN    | -0.2167511 | 0.37410614 |
| sp P48735 IDHP_HUMAN    | -0.2166233 | 0.08307569 |
| sp P61019 RAB2A_HUMAN   | -0.2162361 | 0.2178309  |
| sp O95994 AGR2_HUMAN    | -0.2161255 | 0.26737198 |
| sp P14780 MMP9_HUMAN    | -0.2156277 | 0.48520416 |
| sp P63220 RS21_HUMAN    | -0.2119122 | 0          |
| sp Q13813-3 SPTN1_HUMAN | -0.2105942 | 0          |
| sp P20340-2 RAB6A_HUMAN | -0.2096367 | 0          |
| sp O15230 LAMA5_HUMAN   | -0.2090282 | 0.59872687 |
| sp Q15599-2 NHRF2_HUMAN | -0.2073498 | 0          |
| sp P07355 ANXA2_HUMAN   | -0.2068405 | 0          |
| sp Q13231-2 CHIT1_HUMAN | -0.2052994 | 0          |
| sp P15153 RAC2_HUMAN    | -0.2044334 | 0.656254   |
| sp Q9NVJ2 ARL8B_HUMAN   | -0.2029686 | 0          |
| sp P43490 NAMPT_HUMAN   | -0.201683  | 0.290567   |
| sp Q9BXP5-5 SRRT_HUMAN  | -0.2015801 | 0.45563722 |
| sp Q9Y2J2-4 E41L3_HUMAN | -0.2011318 | 0          |
| sp P13987-2 CD59_HUMAN  | -0.1987686 | 1.1932944  |
| sp Q9BTZ2 DHRS4_HUMAN   | -0.1922302 | 0.35795313 |
| sp P04179-4 SODM_HUMAN  | -0.1915474 | 1.3006523  |
| sp Q6PIU2-2 NCEH1_HUMAN | -0.1912212 | 0.7498006  |
| sp Q9H0U4 RAB1B_HUMAN   | -0.1898956 | 0.30372584 |

|                           |            |            |
|---------------------------|------------|------------|
| sp P09871 C1S_HUMAN       | -0.1851311 | 0.21439649 |
| sp P19525-2 E2AK2_HUMAN   | -0.1837769 | 0          |
| sp P07942 LAMB1_HUMAN     | -0.1778374 | 0.4566054  |
| sp P04004 VTNC_HUMAN      | -0.1770763 | 0.23541966 |
| sp O75923-15 DYSF_HUMAN   | -0.176199  | 0          |
| sp A0A0B4J1X8 HV343_HUMAN | -0.1757622 | 0.656254   |
| sp P05023-4 AT1A1_HUMAN   | -0.1746635 | 0.33162096 |
| sp Q9HDC9 APMAP_HUMAN     | -0.1734428 | 0.56639653 |
| sp Q00839 HNRPU_HUMAN     | -0.1733227 | 0.21680334 |
| sp P13284 GILT_HUMAN      | -0.171484  | 0.45033538 |
| sp Q96EE3-1 SEH1_HUMAN    | -0.1711922 | 0          |
| sp Q14344 GNA13_HUMAN     | -0.1709042 | 0.06291623 |
| sp P62873 GBB1_HUMAN      | -0.1708813 | 0          |
| sp P05091 ALDH2_HUMAN     | -0.1705856 | 0.01115908 |
| sp P12236 ADT3_HUMAN      | -0.1701927 | 0.19149946 |
| sp P51648-2 AL3A2_HUMAN   | -0.1696701 | 0.37060758 |
| sp P30838 AL3A1_HUMAN     | -0.1693993 | 1.1932944  |
| sp O15296 LX15B_HUMAN     | -0.1693955 | 0          |
| sp P30740 ILEU_HUMAN      | -0.1671524 | 0          |
| sp Q14011 CIRBP_HUMAN     | -0.1661167 | 0.19149946 |
| sp P38159 RBMX_HUMAN      | -0.1635819 | 1.1932944  |
| sp O94760 DDAH1_HUMAN     | -0.1633377 | 0          |
| sp P22307-8 NLTP_HUMAN    | -0.1632214 | 0.91272414 |
| sp Q9UFN0 NPS3A_HUMAN     | -0.163002  | 0.61034113 |
| sp Q02083-2 NAAA_HUMAN    | -0.1626244 | 0          |
| sp Q9NZN4 EHD2_HUMAN      | -0.1615982 | 0.8817905  |
| sp P51636-2 CAV2_HUMAN    | -0.1593514 | 0.19149946 |
| sp O95573 ACSL3_HUMAN     | -0.1586475 | 0          |
| sp P36957 ODO2_HUMAN      | -0.1583786 | 0          |
| sp Q15907 RB11B_HUMAN     | -0.1563931 | 0.02662771 |
| sp P05141 ADT2_HUMAN      | -0.1560822 | 0.26737198 |
| sp Q92597 NDRG1_HUMAN     | -0.1556244 | 0.06291623 |
| sp Q13813-2 SPTN1_HUMAN   | -0.1550064 | 0.35795313 |
| sp P61224 RAP1B_HUMAN     | -0.154829  | 0          |
| sp P45880-2 VDAC2_HUMAN   | -0.1546593 | 0.22702569 |
| sp Q06830 PRDX1_HUMAN     | -0.1530838 | 0.06210651 |
| sp Q6YHK3-4 CD109_HUMAN   | -0.1530495 | 0.09894868 |
| sp Q9HD89 RETN_HUMAN      | -0.1520729 | 0.19149946 |
| sp P61421 VA0D1_HUMAN     | -0.1515675 | 0          |
| sp O75955-2 FLOT1_HUMAN   | -0.1510868 | 0.02174174 |
| sp P30044 PRDX5_HUMAN     | -0.1506081 | 0.05621411 |
| sp O60504-2 VINEX_HUMAN   | -0.150547  | 0          |
| sp P51452-2 DUS3_HUMAN    | -0.1500263 | 0          |
| sp P11717 MPRI_HUMAN      | -0.1487541 | 0.2178309  |
| sp P08575-10 PTPRC_HUMAN  | -0.1481094 | 0.21680334 |

|                         |            |            |
|-------------------------|------------|------------|
| sp P23381 SYWC_HUMAN    | -0.1479664 | 0.42828327 |
| sp P98160 PGBM_HUMAN    | -0.146904  | 1.1440369  |
| sp Q16658 FSCN1_HUMAN   | -0.1455631 | 0.37554002 |
| sp P30048-2 PRDX3_HUMAN | -0.1449051 | 0          |
| sp Q8N335 GPD1L_HUMAN   | -0.1446495 | 0.30372584 |
| sp O75390 CISY_HUMAN    | -0.1439781 | 0          |
| sp P51149 RAB7A_HUMAN   | -0.1429119 | 0.24613085 |
| sp Q9UL25 RAB21_HUMAN   | -0.1407414 | 0.06291623 |
| sp Q99536 VAT1_HUMAN    | -0.1402054 | 0.01819076 |
| sp O15143 ARC1B_HUMAN   | -0.139822  | 0          |
| sp P09110 THIK_HUMAN    | -0.1374493 | 0.47871065 |
| sp Q7Z406-2 MYH14_HUMAN | -0.1374455 | 1.1815972  |
| sp Q5JWF2-2 GNAS1_HUMAN | -0.1352158 | 0.09339783 |
| sp P09619 PGFRB_HUMAN   | -0.1345196 | 0.30372584 |
| sp Q00577 PURA_HUMAN    | -0.1343765 | 0.45563722 |
| sp P26447 S10A4_HUMAN   | -0.1316738 | 0.09339783 |
| sp Q86X76-2 NIT1_HUMAN  | -0.1315212 | 0          |
| sp Q9Y277-2 VDAC3_HUMAN | -0.1308136 | 0.48520416 |
| sp P11310-2 ACADM_HUMAN | -0.1304321 | 0.3298487  |
| sp P00505 AATM_HUMAN    | -0.1280289 | 0.06876189 |
| sp O00757 F16P2_HUMAN   | -0.1264935 | 0          |
| sp P42330 AK1C3_HUMAN   | -0.1263981 | 0          |
| sp Q04837 SSBP_HUMAN    | -0.1252232 | 0.2178309  |
| sp Q32MZ4-3 LRRF1_HUMAN | -0.1245537 | 0.1558116  |
| sp P61106 RAB14_HUMAN   | -0.1234436 | 0.02347357 |
| sp P42126-2 ECI1_HUMAN  | -0.1222305 | 0.09894868 |
| sp Q53GQ0 DHB12_HUMAN   | -0.1214123 | 0.33495146 |
| sp O94905 ERLN2_HUMAN   | -0.1205406 | 0          |
| sp P08648 ITA5_HUMAN    | -0.1194725 | 0          |
| sp P07686 HEXB_HUMAN    | -0.1190796 | 0.74639726 |
| sp P08572 CO4A2_HUMAN   | -0.1189308 | 0.56808305 |
| sp O00423-3 EMAL1_HUMAN | -0.1187458 | 0          |
| sp P67809 YBOX1_HUMAN   | -0.1177521 | 0          |
| sp P06899 H2B1J_HUMAN   | -0.1168289 | 0.7827403  |
| sp P24557-2 THAS_HUMAN  | -0.1149826 | 0.19149946 |
| sp Q07157 ZO1_HUMAN     | -0.114378  | 0.8473529  |
| sp P47897 SYQ_HUMAN     | -0.1136436 | 0.04454162 |
| sp P0DOX2 IGA2_HUMAN    | -0.11343   | 0.45033538 |
| sp P40926 MDHM_HUMAN    | -0.1107864 | 0.03984664 |
| sp Q05682-4 CALD1_HUMAN | -0.1103745 | 0          |
| sp Q9UPQ0-3 LIMC1_HUMAN | -0.1096535 | 0          |
| sp P84095 RHOG_HUMAN    | -0.1090698 | 0.35795313 |
| sp Q9NV96-3 CC50A_HUMAN | -0.1090374 | 0          |
| sp P61769 B2MG_HUMAN    | -0.1085701 | 0          |
| sp Q8IWL2-2 SFTA1_HUMAN | -0.1085358 | 0.91072154 |



|                         |            |            |
|-------------------------|------------|------------|
| sp P01920 DQB1_HUMAN    | -0.106678  | 0          |
| sp O43813 LANC1_HUMAN   | -0.1066208 | 0          |
| sp P06737-2 PYGL_HUMAN  | -0.106617  | 0.06644611 |
| sp O43707 ACTN4_HUMAN   | -0.1066151 | 0.01698457 |
| sp Q16363-2 LAMA4_HUMAN | -0.10495   | 0.595364   |
| sp Q9UPN3 MACF1_HUMAN   | -0.1043549 | 0          |
| sp P00367 DHE3_HUMAN    | -0.1040497 | 0.34244674 |
| sp Q09666 AHNK_HUMAN    | -0.1039734 | 0.20721748 |
| sp Q00325-2 MPCP_HUMAN  | -0.1039505 | 0.20467198 |
| sp P62879 GBB2_HUMAN    | -0.103262  | 0          |
| sp P62993 GRB2_HUMAN    | -0.1018829 | 0          |
| sp P78347-2 GTF2I_HUMAN | -0.1018448 | 0.19149946 |
| sp Q99729-2 ROAA_HUMAN  | -0.1018353 | 0          |
| sp P10515 ODP2_HUMAN    | -0.1005497 | 0          |
| sp Q9HB40 RISC_HUMAN    | -0.1003399 | 0.19149946 |
| sp Q13451 FKBP5_HUMAN   | -0.1000557 | 0          |
| sp Q13011 ECH1_HUMAN    | -0.0998497 | 0.33495146 |
| sp P63167 DYL1_HUMAN    | -0.0989018 | 0          |
| sp P12694-2 ODBA_HUMAN  | -0.098733  | 0          |
| sp P06396-2 GELS_HUMAN  | -0.0987225 | 0          |
| sp Q9NNW7 TRXR2_HUMAN   | -0.0985985 | 0.21439649 |
| sp Q6P1N9 TATD1_HUMAN   | -0.0981407 | 0          |
| sp Q5T440 CAF17_HUMAN   | -0.0978546 | 0.09894868 |
| sp P10599-2 THIO_HUMAN  | -0.0970917 | 0.06291623 |
| sp P09960 LKHA4_HUMAN   | -0.0939026 | 0.40484723 |
| sp Q9ULV4-3 COR1C_HUMAN | -0.0931721 | 0          |
| sp P42167-2 LAP2B_HUMAN | -0.0924606 | 0.51870745 |
| sp O75367-2 H2AY_HUMAN  | -0.0920334 | 0.8675019  |
| sp O43760-2 SNG2_HUMAN  | -0.0913429 | 0          |
| sp Q8NBX0 SCPDL_HUMAN   | -0.0910492 | 0          |
| sp P50148 GNAQ_HUMAN    | -0.090477  | 0.06291623 |
| sp Q7Z4W1 DCXR_HUMAN    | -0.089365  | 0          |
| sp Q969H8 MYDGF_HUMAN   | -0.0891743 | 0          |
| sp Q9NPJ3-2 ACO13_HUMAN | -0.0891399 | 0          |
| sp P04080 CYTB_HUMAN    | -0.0887718 | 0          |
| sp P60709 ACTB_HUMAN    | -0.0871487 | 0          |
| sp O15247 CLIC2_HUMAN   | -0.0865593 | 0          |
| sp P16219 ACADS_HUMAN   | -0.086134  | 0.06291623 |
| sp P61586 RHOA_HUMAN    | -0.0856733 | 0          |
| sp P22033 MUTA_HUMAN    | -0.0834789 | 0          |
| sp Q9UDY2-3 ZO2_HUMAN   | -0.0830059 | 0.356152   |
| sp P43353-2 AL3B1_HUMAN | -0.082758  | 0          |
| sp Q8NFW8 NEUA_HUMAN    | -0.0822811 | 0          |
| sp P62714 PP2AB_HUMAN   | -0.08218   | 0          |
| sp P09467 F16P1_HUMAN   | -0.0812511 | 0.08684197 |

|                         |            |            |
|-------------------------|------------|------------|
| sp Q16762 THTR_HUMAN    | -0.0808868 | 0          |
| sp P51608 MECP2_HUMAN   | -0.0799484 | 0.45033538 |
| sp P29218 IMPA1_HUMAN   | -0.079937  | 0.04454162 |
| sp Q9Y2Q5 LTOR2_HUMAN   | -0.0797033 | 0.19149946 |
| sp Q9HCC0-2 MCCB_HUMAN  | -0.0793953 | 0          |
| sp Q04941 PLP2_HUMAN    | -0.0790253 | 0          |
| sp P01111 RASN_HUMAN    | -0.0788479 | 0          |
| sp Q96MM6 HS12B_HUMAN   | -0.0780754 | 0.5176613  |
| sp Q96RQ3 MCCA_HUMAN    | -0.0778961 | 0          |
| sp Q9H4M9 EHD1_HUMAN    | -0.0778694 | 0          |
| sp P61604 CH10_HUMAN    | -0.0772438 | 0          |
| sp P23634-2 AT2B4_HUMAN | -0.0772076 | 0          |
| sp P59998 ARPC4_HUMAN   | -0.0768776 | 0.09339783 |
| sp O94925-3 GLSK_HUMAN  | -0.0763054 | 0          |
| sp Q9NZM1-3 MYOF_HUMAN  | -0.0762882 | 0          |
| sp P04839 CY24B_HUMAN   | -0.0760574 | 0          |
| sp P30050 RL12_HUMAN    | -0.0759697 | 0.26737198 |
| sp P49593 PPM1F_HUMAN   | -0.075572  | 0          |
| sp Q9NP72-2 RAB18_HUMAN | -0.0751934 | 0.21439649 |
| sp P0DP25 CALM3_HUMAN   | -0.0751019 | 0          |
| sp Q6P179 ERAP2_HUMAN   | -0.0742302 | 0          |
| sp P50213 IDH3A_HUMAN   | -0.0742111 | 0          |
| sp P61081 UBC12_HUMAN   | -0.0734367 | 0          |
| sp Q02218-2 ODO1_HUMAN  | -0.0731201 | 0          |
| sp P29992 GNA11_HUMAN   | -0.0725842 | 0          |
| sp P63010-2 AP2B1_HUMAN | -0.0725155 | 0          |
| sp P62820 RAB1A_HUMAN   | -0.0709534 | 0          |
| sp Q14254 FLOT2_HUMAN   | -0.070282  | 0.05681695 |
| sp P60228 EIF3E_HUMAN   | -0.0699692 | 0.30372584 |
| sp P67775-2 PP2AA_HUMAN | -0.0672531 | 0          |
| sp P04075 ALDOA_HUMAN   | -0.0670624 | 0.04788631 |
| sp Q8IWB7 WDFY1_HUMAN   | -0.0669003 | 0          |
| sp P23284 PIIB_HUMAN    | -0.0661087 | 0          |
| sp P53041 PPP5_HUMAN    | -0.0659714 | 0.09339783 |
| sp P42765 THIM_HUMAN    | -0.0656052 | 0.16150911 |
| sp Q9UBW8 CSN7A_HUMAN   | -0.0651398 | 0          |
| sp Q96EM0 T3HPD_HUMAN   | -0.0645275 | 0          |
| sp P36543-2 VATE1_HUMAN | -0.0641708 | 0.09894868 |
| sp Q02252-2 MMSA_HUMAN  | -0.0635395 | 0.19149946 |
| sp Q6P587-3 FAHD1_HUMAN | -0.0631809 | 0.09894868 |
| sp Q16698-2 DECR_HUMAN  | -0.0631199 | 0.25761655 |
| sp P51553-2 IDH3G_HUMAN | -0.0630798 | 0          |
| sp P52788 SPSY_HUMAN    | -0.0630493 | 0.7061832  |
| sp P17931 LEG3_HUMAN    | -0.0627365 | 0          |
| sp Q13232 NDK3_HUMAN    | -0.0620251 | 0          |

|                         |            |            |
|-------------------------|------------|------------|
| sp P00488 F13A_HUMAN    | -0.0616589 | 0          |
| sp P10301 RRAS_HUMAN    | -0.0607433 | 0.2178309  |
| sp Q9P2R7-2 SUCB1_HUMAN | -0.0583572 | 0          |
| sp Q13938-4 CAYP1_HUMAN | -0.058342  | 0          |
| sp Q96TC7 RMD3_HUMAN    | -0.0578175 | 0          |
| sp O43684-2 BUB3_HUMAN  | -0.0575161 | 0          |
| sp P37837 TALDO_HUMAN   | -0.0571766 | 0.02575658 |
| sp P01903 DRA_HUMAN     | -0.0571518 | 0.10017801 |
| sp P27695 APEX1_HUMAN   | -0.0570107 | 0          |
| sp P52565 GDIR1_HUMAN   | -0.0567131 | 0.02174174 |
| sp Q8N9N7 LRC57_HUMAN   | -0.056675  | 0          |
| sp Q13404 UB2V1_HUMAN   | -0.0565834 | 0          |
| sp O14786 NRP1_HUMAN    | -0.0562477 | 0.09894868 |
| sp P06865 HEXA_HUMAN    | -0.0561848 | 0.40256184 |
| sp P54136 SYRC_HUMAN    | -0.0553188 | 0          |
| sp P09382 LEG1_HUMAN    | -0.0550194 | 0          |
| sp P61158 ARP3_HUMAN    | -0.0540199 | 0.21807808 |
| sp O15173-2 PGRC2_HUMAN | -0.0530396 | 0.09750395 |
| sp P21980 TGM2_HUMAN    | -0.0525208 | 0.01949666 |
| sp O95571 ETHE1_HUMAN   | -0.0523853 | 0.26546443 |
| sp P22695 QCR2_HUMAN    | -0.0522156 | 0          |
| sp P51649-2 SSDH_HUMAN  | -0.0520935 | 0          |
| sp Q9BXS5-2 AP1M1_HUMAN | -0.05126   | 0          |
| sp P63261 ACTG_HUMAN    | -0.0491333 | 0          |
| sp Q02978 M2OM_HUMAN    | -0.0478115 | 0.19410844 |
| sp Q10567-2 AP1B1_HUMAN | -0.0477428 | 0.21439649 |
| sp P61160 ARP2_HUMAN    | -0.0475006 | 0          |
| sp P50995-2 ANX11_HUMAN | -0.0466366 | 0.10328458 |
| sp Q15181 IPYR_HUMAN    | -0.0463409 | 0          |
| sp P28074 PSB5_HUMAN    | -0.0457764 | 0          |
| sp P05362 ICAM1_HUMAN   | -0.0457478 | 0.01551361 |
| sp Q9NSD9 SYFB_HUMAN    | -0.0456467 | 0          |
| sp Q9Y6N5 SQOR_HUMAN    | -0.0455418 | 0.09215608 |
| sp O60814 H2B1K_HUMAN   | -0.0445538 | 0.45033538 |
| sp P09211 GSTP1_HUMAN   | -0.0441055 | 0.17871295 |
| sp P16435 NCPR_HUMAN    | -0.0438252 | 0.02114108 |
| sp P41091 IF2G_HUMAN    | -0.0414162 | 0          |
| sp Q08209-2 PP2BA_HUMAN | -0.0412712 | 0          |
| sp Q15369-2 ELOC_HUMAN  | -0.0408573 | 0          |
| sp Q15366-2 PCBP2_HUMAN | -0.0406456 | 0          |
| sp O75643 U520_HUMAN    | -0.0404797 | 0          |
| sp Q16629-4 SRSF7_HUMAN | -0.0399265 | 0.1342476  |
| sp Q9NQC3 RTN4_HUMAN    | -0.0399132 | 0.4075265  |
| sp Q6NUK1-2 SCMC1_HUMAN | -0.039896  | 0.17511293 |
| sp O75695 XRP2_HUMAN    | -0.0397873 | 0.2178309  |

|                         |            |            |
|-------------------------|------------|------------|
| sp Q92973-2 TNPO1_HUMAN | -0.0393868 | 0.09894868 |
| sp P35237 SPB6_HUMAN    | -0.0389004 | 0.00764478 |
| sp P04899-3 GNAI2_HUMAN | -0.0388412 | 0          |
| sp O75608-2 LYPA1_HUMAN | -0.0381641 | 0          |
| sp P10809 CH60_HUMAN    | -0.037878  | 0.00415907 |
| sp O43747-2 AP1G1_HUMAN | -0.037508  | 0          |
| sp Q5EBM0-3 CMPK2_HUMAN | -0.0375061 | 0          |
| sp P07099 HYEP_HUMAN    | -0.0374985 | 0.07020342 |
| sp P60900 PSA6_HUMAN    | -0.0364418 | 0          |
| sp Q6UVK1 CSPG4_HUMAN   | -0.035902  | 0.06986027 |
| sp P62258 1433E_HUMAN   | -0.035635  | 0          |
| sp P01116-2 RASK_HUMAN  | -0.0354443 | 0          |
| sp P15121 ALDR_HUMAN    | -0.035429  | 0          |
| sp P40121 CAPG_HUMAN    | -0.035202  | 0          |
| sp Q6YN16 HSDL2_HUMAN   | -0.0347013 | 0.02662771 |
| sp P49327 FAS_HUMAN     | -0.0344219 | 0.03060993 |
| sp Q16853 AOC3_HUMAN    | -0.0342922 | 0.01542275 |
| sp O00391 QSOX1_HUMAN   | -0.0342007 | 0.06291623 |
| sp P21796 VDAC1_HUMAN   | -0.0341911 | 0          |
| sp P06744 G6PI_HUMAN    | -0.0334797 | 0          |
| sp Q96N66-3 MBOA7_HUMAN | -0.0333996 | 0          |
| sp Q04917 1433F_HUMAN   | -0.0333157 | 0          |
| sp P16278-2 BGAL_HUMAN  | -0.0328274 | 0.09894868 |
| sp O60437 PEPL_HUMAN    | -0.0321579 | 0.04344815 |
| sp O75521-2 ECI2_HUMAN  | -0.03162   | 0          |
| sp Q86Y82 STX12_HUMAN   | -0.0311699 | 0.20467198 |
| sp Q04760-2 LGUL_HUMAN  | -0.03092   | 0          |
| sp P39060-1 COIA1_HUMAN | -0.0303364 | 0.3005443  |
| sp Q96AC1 FERM2_HUMAN   | -0.029604  | 0.1549097  |
| sp P46063 RECQ1_HUMAN   | -0.0288677 | 0          |
| sp O75369-2 FLNB_HUMAN  | -0.0280018 | 0.04946801 |
| sp P53634 CATC_HUMAN    | -0.0277901 | 0.06291623 |
| sp Q96FV2-2 SCRN2_HUMAN | -0.0271988 | 0          |
| sp P19474 RO52_HUMAN    | -0.0268974 | 0          |
| sp P02795 MT2_HUMAN     | -0.0268574 | 0          |
| sp P43034 LIS1_HUMAN    | -0.0266228 | 0          |
| sp Q12931-2 TRAP1_HUMAN | -0.0264473 | 0          |
| sp O00231-2 PSD11_HUMAN | -0.0253716 | 0.24097534 |
| sp Q9H845 ACAD9_HUMAN   | -0.0251465 | 0          |
| sp O95425-4 SVIL_HUMAN  | -0.02458   | 0          |
| sp Q8IUZ5 AT2L2_HUMAN   | -0.0245037 | 0          |
| sp P24752 THIL_HUMAN    | -0.0230942 | 0          |
| sp P49748-2 ACADV_HUMAN | -0.023037  | 0          |
| sp P38646 GRP75_HUMAN   | -0.0230274 | 0.12274049 |
| sp P49902-2 5NTC_HUMAN  | -0.0229912 | 0          |

|                           |            |            |
|---------------------------|------------|------------|
| sp Q96I99 SUCB2_HUMAN     | -0.0228519 | 0.01073991 |
| sp P17858-2 PFKAL_HUMAN   | -0.0227928 | 0.20174193 |
| sp P43121 MUC18_HUMAN     | -0.0224133 | 0          |
| sp P15311 EZRI_HUMAN      | -0.0219498 | 0          |
| sp Q9UQ80 PA2G4_HUMAN     | -0.0217819 | 0          |
| sp Q969X5 ERGI1_HUMAN     | -0.0212288 | 0          |
| sp O75323 NIPS2_HUMAN     | -0.021183  | 0          |
| sp P08758 ANXA5_HUMAN     | -0.0211067 | 0.01259616 |
| sp P35579 MYH9_HUMAN      | -0.0209904 | 0.2094525  |
| sp P24539 AT5F1_HUMAN     | -0.0206585 | 0          |
| sp A0A0B4J2D5 GAL3B_HUMAN | -0.0205364 | 0          |
| sp P12081-4 SYHC_HUMAN    | -0.0201035 | 0          |
| sp P61960 UFM1_HUMAN      | -0.0200462 | 0          |
| sp P35221 CTNA1_HUMAN     | -0.0200386 | 0.02812482 |
| sp P55072 TERA_HUMAN      | -0.0199585 | 0.05115994 |
| sp Q96CW1-2 AP2M1_HUMAN   | -0.0198536 | 0          |
| sp O75439 MPPB_HUMAN      | -0.0197163 | 0.1558116  |
| sp Q3KQV9 UAP1L_HUMAN     | -0.0194626 | 0.19149946 |
| sp Q9UHL4 DPP2_HUMAN      | -0.0192623 | 0          |
| sp P06702 S10A9_HUMAN     | -0.0189247 | 0.1897449  |
| sp P51991 ROA3_HUMAN      | -0.018899  | 0          |
| sp P04424-2 ARLY_HUMAN    | -0.0187416 | 0          |
| sp O15400-2 STX7_HUMAN    | -0.0184574 | 0          |
| sp O00483 NDUA4_HUMAN     | -0.0172997 | 0.09894868 |
| sp P15170-2 ERF3A_HUMAN   | -0.017025  | 0          |
| sp P09496-2 CLCA_HUMAN    | -0.01618   | 0          |
| sp O15144 ARPC2_HUMAN     | -0.0150414 | 0.19149946 |
| sp P27824-2 CALX_HUMAN    | -0.0150185 | 0.06534385 |
| sp Q14165 MLEC_HUMAN      | -0.0144615 | 0          |
| sp Q02750 MP2K1_HUMAN     | -0.0143299 | 0          |
| sp Q9P2T1-2 GMPR2_HUMAN   | -0.0137787 | 0          |
| sp P53597 SUCA_HUMAN      | -0.0136414 | 0          |
| sp P38606-2 VATA_HUMAN    | -0.0135651 | 0          |
| sp P46926 GNPI1_HUMAN     | -0.0131416 | 0          |
| sp P63244 RACK1_HUMAN     | -0.0123329 | 0          |
| sp P27105 STOM_HUMAN      | -0.011404  | 0.1804695  |
| sp P04275 VWF_HUMAN       | -0.0111637 | 0.02421166 |
| sp P49903-2 SPS1_HUMAN    | -0.0106354 | 0          |
| sp Q02543 RL18A_HUMAN     | -0.0104809 | 0          |
| sp Q7Z4I7-3 LIMS2_HUMAN   | -0.0096493 | 0          |
| sp Q96I15 SCLY_HUMAN      | -0.0094109 | 0          |
| sp Q13228-4 SBP1_HUMAN    | -0.0091763 | 0.00148549 |
| sp P38919 IF4A3_HUMAN     | -0.0090446 | 0          |
| sp P32456 GBP2_HUMAN      | -0.0088711 | 0          |
| sp Q9P0V9-2 SEP10_HUMAN   | -0.0088425 | 0.19410844 |

|                         |            |            |
|-------------------------|------------|------------|
| sp Q00169 PIPNA_HUMAN   | -0.0073109 | 0          |
| sp Q06136 KDSR_HUMAN    | -0.006752  | 0          |
| sp Q9Y2Q3-3 GSTK1_HUMAN | -0.0065079 | 0          |
| sp Q15365 PCBP1_HUMAN   | -0.0062275 | 0.18414244 |
| sp P13489 RINI_HUMAN    | -0.0061684 | 0.00508175 |
| sp Q15056-2 IF4H_HUMAN  | -0.0061264 | 0          |
| sp O95833 CLIC3_HUMAN   | -0.005825  | 0.04454162 |
| sp O75534-2 CSDE1_HUMAN | -0.0044003 | 0          |
| sp P09543-2 CN37_HUMAN  | -0.0041237 | 0          |
| sp Q14203-4 DCTN1_HUMAN | -0.0038528 | 0.07727676 |
| sp Q9Y6B6 SAR1B_HUMAN   | -0.0036201 | 0          |
| sp P12109 CO6A1_HUMAN   | -0.0033703 | 0.3905819  |
| sp Q29865 1C18_HUMAN    | -0.0028801 | 0.09894868 |
| sp P24821-4 TENA_HUMAN  | -0.0024757 | 0.13308895 |
| sp Q92598-2 HS105_HUMAN | -0.002121  | 0          |
| sp Q9BPW8 NIPS1_HUMAN   | -0.0017624 | 0          |
| sp Q8TC12-2 RDH11_HUMAN | -0.0016689 | 0          |
| sp Q9NQR4 NIT2_HUMAN    | -0.0013809 | 0          |
| sp P63000-2 RAC1_HUMAN  | -0.0012589 | 0          |
| sp P17612 KAPCA_HUMAN   | -0.0010223 | 0          |
| sp P35754 GLRX1_HUMAN   | -5.57E-04  | 0          |
| sp P00387-3 NB5R3_HUMAN | -5.46E-04  | 0          |
| sp P28482 MK01_HUMAN    | -4.84E-04  | 0          |
| sp Q07954 LRP1_HUMAN    | -1.79E-04  | 0.05779712 |
| sp Q9HBL0 TENS1_HUMAN   | 6.81E-04   | 0.03357808 |
| sp P36551 HEM6_HUMAN    | 8.30E-04   | 0          |
| sp Q08211 DHX9_HUMAN    | 9.80E-04   | 0.07934754 |
| sp P14618-3 KPYM_HUMAN  | 0.00149727 | 0          |
| sp O75436 VP26A_HUMAN   | 0.00152397 | 0.06291623 |
| sp A6NMZ7 CO6A6_HUMAN   | 0.00166512 | 0.20281352 |
| sp P61163 ACTZ_HUMAN    | 0.00239754 | 0          |
| sp Q8IY17-3 PLPL6_HUMAN | 0.00239754 | 0          |
| sp P11216 PYGB_HUMAN    | 0.00259972 | 0.15874931 |
| sp Q14558-2 KPRA_HUMAN  | 0.00291729 | 0          |
| sp Q15393 SF3B3_HUMAN   | 0.00319672 | 0.03630202 |
| sp P04406 G3P_HUMAN     | 0.0032177  | 0          |
| sp P12111 CO6A3_HUMAN   | 0.00324821 | 0.30513477 |
| sp O75083 WDR1_HUMAN    | 0.00363922 | 0          |
| sp O94919 ENDD1_HUMAN   | 0.00400162 | 0.06291623 |
| sp Q9BSJ8-2 ESYT1_HUMAN | 0.00407028 | 0.01044662 |
| sp P32969 RL9_HUMAN     | 0.00432205 | 0.09894868 |
| sp P35222 CTNB1_HUMAN   | 0.00497437 | 0          |
| sp P23396 RS3_HUMAN     | 0.00514603 | 0          |
| sp Q05655-2 KPCD_HUMAN  | 0.00515747 | 0          |
| sp P62834 RAP1A_HUMAN   | 0.00518799 | 0          |

|                         |            |            |
|-------------------------|------------|------------|
| sp P52790 HXK3_HUMAN    | 0.00534821 | 0          |
| sp Q9UNH7 SNX6_HUMAN    | 0.00569916 | 0          |
| sp O15498-2 YKT6_HUMAN  | 0.00575256 | 0          |
| sp P55010 IF5_HUMAN     | 0.00667    | 0          |
| sp P51178-2 PLCD1_HUMAN | 0.0069561  | 0          |
| sp P46781 RS9_HUMAN     | 0.00741768 | 0.2207585  |
| sp Q9H2G2-2 SLK_HUMAN   | 0.00749588 | 0          |
| sp P08754 GNAI3_HUMAN   | 0.00764656 | 0          |
| sp Q14118 DAG1_HUMAN    | 0.0077877  | 0          |
| sp O00468-7 AGRIN_HUMAN | 0.00798988 | 0.45033538 |
| sp Q14139-2 UBE4A_HUMAN | 0.008564   | 0          |
| sp P49065 ALBU_RABIT    | 0.00875473 | 0          |
| sp Q13884 SNTB1_HUMAN   | 0.00881767 | 0.09894868 |
| sp P62942 FKB1A_HUMAN   | 0.00917816 | 0          |
| sp Q9NTX5-3 ECHD1_HUMAN | 0.00949097 | 0.02662771 |
| sp P04083 ANXA1_HUMAN   | 0.01080132 | 0.00699881 |
| sp P46782 RS5_HUMAN     | 0.01151848 | 0.12897664 |
| sp B5ME19 EIFCL_HUMAN   | 0.01169014 | 0.05483269 |
| sp Q92734-2 TFG_HUMAN   | 0.0118866  | 0          |
| sp P01859 IGHG2_HUMAN   | 0.01242065 | 0.02174174 |
| sp O75874 IDHC_HUMAN    | 0.01261902 | 0          |
| sp Q9Y2A7-2 NCKP1_HUMAN | 0.01264572 | 0          |
| sp Q13751 LAMB3_HUMAN   | 0.01329041 | 0.30372584 |
| sp P0CG39 POTEJ_HUMAN   | 0.0135231  | 0          |
| sp Q9H0W9-2 CK054_HUMAN | 0.01432419 | 0          |
| sp P26038 MOES_HUMAN    | 0.01443863 | 0.00435698 |
| sp P50990 TCPQ_HUMAN    | 0.01478577 | 0.06941727 |
| sp Q13492-2 PICAL_HUMAN | 0.01506233 | 0          |
| sp P61026 RAB10_HUMAN   | 0.01510239 | 0          |
| sp P48960-2 CD97_HUMAN  | 0.0154438  | 0          |
| sp P06576 ATPB_HUMAN    | 0.0158062  | 0.01100408 |
| sp P14866 HNRPL_HUMAN   | 0.01631928 | 0          |
| sp O75340-2 PDCD6_HUMAN | 0.01663971 | 0          |
| sp Q9GZM7-3 TINAL_HUMAN | 0.01736927 | 0          |
| sp P13804-2 ETFPA_HUMAN | 0.01768112 | 0          |
| sp P52272-2 HNRPM_HUMAN | 0.01786041 | 0.2074024  |
| sp P05388-2 RLAO_HUMAN  | 0.01787186 | 0          |
| sp O75348 VATG1_HUMAN   | 0.01818085 | 0          |
| sp P09525 ANXA4_HUMAN   | 0.01832008 | 0          |
| sp Q9Y394-2 DHRS7_HUMAN | 0.01836777 | 0          |
| sp Q9H9G7-2 AGO3_HUMAN  | 0.01861572 | 0          |
| sp Q13423 NNTM_HUMAN    | 0.01872826 | 0.14338206 |
| sp Q15005 SPCS2_HUMAN   | 0.01896286 | 0          |
| sp Q9H9B4 SFXN1_HUMAN   | 0.01897621 | 0          |
| sp P07996 TSP1_HUMAN    | 0.01931191 | 0.04454162 |

|                         |            |            |
|-------------------------|------------|------------|
| sp Q9HB07 MYG1_HUMAN    | 0.01963806 | 0          |
| sp Q12797-10 ASPH_HUMAN | 0.02005959 | 0.20467198 |
| sp Q9P0K7-2 RAI14_HUMAN | 0.02087402 | 0          |
| sp P08779 K1C16_HUMAN   | 0.02138138 | 0          |
| sp Q86TX2 ACOT1_HUMAN   | 0.02140999 | 0          |
| sp P21964-2 COMT_HUMAN  | 0.02254868 | 0          |
| sp O00299 CLIC1_HUMAN   | 0.02430534 | 0          |
| sp P23246 SFPQ_HUMAN    | 0.02437782 | 0          |
| sp P07948-2 LYN_HUMAN   | 0.02453995 | 0          |
| sp P62316 SMD2_HUMAN    | 0.02456474 | 0          |
| sp O60256-3 KPRB_HUMAN  | 0.02458191 | 0          |
| sp Q9TQE0 2B19_HUMAN    | 0.02531815 | 0          |
| sp Q9H299 SH3L3_HUMAN   | 0.02545548 | 0          |
| sp P00403 COX2_HUMAN    | 0.02589035 | 0          |
| sp P23368 MAOM_HUMAN    | 0.02618027 | 0          |
| sp P41250 GARS_HUMAN    | 0.02626896 | 0.09851671 |
| sp P42025 ACTY_HUMAN    | 0.02687073 | 0          |
| sp P52209-2 6PGD_HUMAN  | 0.02689934 | 0          |
| sp Q8N5K1 CISD2_HUMAN   | 0.02707863 | 0.45033538 |
| sp Q00765 REEP5_HUMAN   | 0.0271225  | 0          |
| sp Q8WUP2-3 FBLI1_HUMAN | 0.02734375 | 0          |
| sp P05198 IF2A_HUMAN    | 0.02742958 | 0          |
| sp P48449-3 ERG7_HUMAN  | 0.02744865 | 0.09339783 |
| sp P0DMV9 HS71B_HUMAN   | 0.02748871 | 0          |
| sp P09668 CATH_HUMAN    | 0.027565   | 0.20467198 |
| sp P14868 SYDC_HUMAN    | 0.02780724 | 0.01551361 |
| sp P30491 1B53_HUMAN    | 0.028759   | 0          |
| sp O95197-2 RTN3_HUMAN  | 0.02938271 | 0          |
| sp P54920 SNAA_HUMAN    | 0.02948189 | 0          |
| sp P29590 PML_HUMAN     | 0.0295639  | 0.00697919 |
| sp Q9UJ70-2 NAGK_HUMAN  | 0.02975655 | 0          |
| sp O43175 SERA_HUMAN    | 0.02996445 | 0.16077396 |
| sp Q15833-2 STXB2_HUMAN | 0.03025818 | 0          |
| sp Q01130-2 SRSF2_HUMAN | 0.03046417 | 0          |
| sp P13797 PLST_HUMAN    | 0.03051949 | 0          |
| sp P0DJI8 SAA1_HUMAN    | 0.03063965 | 0          |
| sp P15880 RS2_HUMAN     | 0.03068352 | 0.29066643 |
| sp Q5JTV8-3 TOIP1_HUMAN | 0.03082085 | 0.21439649 |
| sp Q15836 VAMP3_HUMAN   | 0.03103638 | 0          |
| sp P17655 CAN2_HUMAN    | 0.03115273 | 0.39074486 |
| sp O14980 XPO1_HUMAN    | 0.0314064  | 0.6298893  |
| sp Q9NTJ5 SAC1_HUMAN    | 0.03169441 | 0          |
| sp P30040 ERP29_HUMAN   | 0.03192329 | 0.04454162 |
| sp P08134 RHOC_HUMAN    | 0.03199005 | 0          |
| sp P26196 DDX6_HUMAN    | 0.0321312  | 0          |



|                         |            |            |
|-------------------------|------------|------------|
| sp O14828-2 SCAM3_HUMAN | 0.03214073 | 0          |
| sp P07237 PDIA1_HUMAN   | 0.03288269 | 0.22529724 |
| sp P26639-2 SYTC_HUMAN  | 0.03307533 | 0          |
| sp Q6NY19-2 KANK3_HUMAN | 0.03355789 | 0          |
| sp P11686-2 PSPC_HUMAN  | 0.03434372 | 0          |
| sp Q13185 CBX3_HUMAN    | 0.03453064 | 0.2178309  |
| sp O60234 GMFG_HUMAN    | 0.03465653 | 0.14672586 |
| sp P09497-2 CLCB_HUMAN  | 0.03475952 | 0          |
| sp P32455 GBP1_HUMAN    | 0.03506088 | 0.02174174 |
| sp P31040 SDHA_HUMAN    | 0.03513527 | 0.03712561 |
| sp P18206-2 VINC_HUMAN  | 0.03515816 | 0.03297596 |
| sp P31930 QCR1_HUMAN    | 0.03517342 | 0.0315703  |
| sp Q9BVG4 PBDC1_HUMAN   | 0.0354538  | 0          |
| sp P30626-2 SORCN_HUMAN | 0.03548813 | 0          |
| sp P26641 EF1G_HUMAN    | 0.03574181 | 0.01576272 |
| sp O75688 PPM1B_HUMAN   | 0.03590393 | 0          |
| sp Q13162 PRDX4_HUMAN   | 0.03639984 | 0          |
| sp Q6UWY5 OLFL1_HUMAN   | 0.03668976 | 0.16702904 |
| sp P28072 PSB6_HUMAN    | 0.03678894 | 0          |
| sp Q14103-3 HNRPD_HUMAN | 0.03725624 | 0.24660711 |
| sp P49458 SRP09_HUMAN   | 0.03726959 | 0          |
| sp Q13555-7 KCC2G_HUMAN | 0.03734493 | 0          |
| sp Q99459 CDC5L_HUMAN   | 0.03734589 | 0          |
| sp Q99460-2 PSMD1_HUMAN | 0.03762436 | 0          |
| sp P20073-2 ANXA7_HUMAN | 0.03764916 | 0.34244674 |
| sp P61006 RAB8A_HUMAN   | 0.03779984 | 0          |
| sp P01019 ANGT_HUMAN    | 0.03803825 | 0          |
| sp P25705 ATPA_HUMAN    | 0.03844261 | 0.08325488 |
| sp P62330 ARF6_HUMAN    | 0.03918266 | 0          |
| sp P55196-5 AFAD_HUMAN  | 0.03976822 | 0          |
| sp Q9Y3I0 RTCB_HUMAN    | 0.03981972 | 0.1897449  |
| sp P23526 SAHH_HUMAN    | 0.04010773 | 0.02863072 |
| sp P06733 ENOA_HUMAN    | 0.04094505 | 0          |
| sp P53602 MVD1_HUMAN    | 0.04097557 | 0          |
| sp O00764-2 PDXK_HUMAN  | 0.04101372 | 0.02662771 |
| sp Q9Y6C2 EMIL1_HUMAN   | 0.04167175 | 0.01542275 |
| sp P08559-2 ODPA_HUMAN  | 0.04231262 | 0.1791607  |
| sp P47755 CAZA2_HUMAN   | 0.04243469 | 0          |
| sp P46736-3 BRCC3_HUMAN | 0.04274368 | 0          |
| sp P02679-2 FIBG_HUMAN  | 0.04277802 | 0          |
| sp O00264 PGRC1_HUMAN   | 0.04297638 | 0          |
| sp A5A3E0 POTEF_HUMAN   | 0.04332256 | 0          |
| sp Q9UI12-2 VATH_HUMAN  | 0.04372025 | 0          |
| sp Q13636 RAB31_HUMAN   | 0.04442406 | 0          |
| sp Q8N392 RHG18_HUMAN   | 0.04458046 | 0.02174174 |

|                         |            |            |
|-------------------------|------------|------------|
| sp P61981 1433G_HUMAN   | 0.04481697 | 0          |
| sp Q16531 DDB1_HUMAN    | 0.04485703 | 0.14321187 |
| sp O95352 ATG7_HUMAN    | 0.04512024 | 0          |
| sp Q8NBF2-2 NHLC2_HUMAN | 0.04528999 | 0          |
| sp Q9ULC5-3 ACSL5_HUMAN | 0.04535484 | 0          |
| sp P17844-2 DDX5_HUMAN  | 0.04536629 | 0          |
| sp Q96HC4 PDLI5_HUMAN   | 0.04553413 | 0.10017801 |
| sp P54619-2 AAKG1_HUMAN | 0.0455513  | 0          |
| sp O75964 ATP5L_HUMAN   | 0.04594612 | 0          |
| sp P25398 RS12_HUMAN    | 0.0460968  | 0          |
| sp Q9NUV9 GIMA4_HUMAN   | 0.0460968  | 0          |
| sp P05166-2 PCCB_HUMAN  | 0.04623604 | 0          |
| sp Q16787-3 LAMA3_HUMAN | 0.04623795 | 0          |
| sp P09972 ALDOC_HUMAN   | 0.04627228 | 0          |
| sp Q13418 ILK_HUMAN     | 0.04687119 | 0          |
| sp A1L0T0 ILVBL_HUMAN   | 0.04741478 | 0          |
| sp O43865 SAHH2_HUMAN   | 0.04747391 | 0.14672586 |
| sp Q14533 KRT81_HUMAN   | 0.04792976 | 0          |
| sp O43795-2 MYO1B_HUMAN | 0.04884434 | 0.44572112 |
| sp O95865 DDAH2_HUMAN   | 0.04929733 | 0.1791607  |
| sp P12110 CO6A2_HUMAN   | 0.04941559 | 0.27953532 |
| sp P60174 TPIS_HUMAN    | 0.04993248 | 0.01949666 |
| sp P28070 PSB4_HUMAN    | 0.05032539 | 0.04454162 |
| sp O00186 STXB3_HUMAN   | 0.05043125 | 0          |
| sp P34897-3 GLYM_HUMAN  | 0.05061913 | 0.30372584 |
| sp Q9Y2X3 NOP58_HUMAN   | 0.05094719 | 0          |
| sp P36871 PGM1_HUMAN    | 0.05101204 | 0.12625508 |
| sp P23786 CPT2_HUMAN    | 0.05138779 | 0          |
| sp P09622 DLDH_HUMAN    | 0.05140686 | 0.04817784 |
| sp Q99829 CPNE1_HUMAN   | 0.05209351 | 0          |
| sp P58107 EPIPL_HUMAN   | 0.05236816 | 0.16702904 |
| sp P63096 GNAI1_HUMAN   | 0.0532074  | 0          |
| sp Q9H8L6 MMRN2_HUMAN   | 0.05323792 | 0.312067   |
| sp Q13217 DNJC3_HUMAN   | 0.05344582 | 0.17319627 |
| sp P62917 RL8_HUMAN     | 0.05354118 | 0.3005443  |
| sp P68036-3 UB2L3_HUMAN | 0.05360603 | 0          |
| sp P12955 PEPD_HUMAN    | 0.05370331 | 0          |
| sp P0C0S5 H2AZ_HUMAN    | 0.05388069 | 0.656254   |
| sp Q9NVD7 PARVA_HUMAN   | 0.05441475 | 0.06986027 |
| sp P28066 PSA5_HUMAN    | 0.05455399 | 0.09894868 |
| sp Q9Y281 COF2_HUMAN    | 0.05474854 | 0          |
| sp O95202 LETM1_HUMAN   | 0.0548687  | 0.35193655 |
| sp Q14240-2 IF4A2_HUMAN | 0.05547905 | 0          |
| sp Q16527 CSRP2_HUMAN   | 0.05551529 | 0          |
| sp P26440 IVD_HUMAN     | 0.0557785  | 0          |

|                         |            |            |
|-------------------------|------------|------------|
| sp P02760 AMBP_HUMAN    | 0.05607224 | 0.03367973 |
| sp P49257 LMAN1_HUMAN   | 0.05617905 | 0          |
| sp P06748-3 NPM_HUMAN   | 0.05630112 | 0          |
| sp P62244 RS15A_HUMAN   | 0.05633354 | 0          |
| sp Q8WXH0-2 SYNE2_HUMAN | 0.05664539 | 0          |
| sp Q6PCB0 VWA1_HUMAN    | 0.05681992 | 0          |
| sp O00291 HIP1_HUMAN    | 0.05726624 | 0          |
| sp P07900-2 HS90A_HUMAN | 0.05734634 | 0.14132895 |
| sp P19367-3 HXK1_HUMAN  | 0.05799103 | 0.15079153 |
| sp P40227 TCPZ_HUMAN    | 0.05835342 | 0.02388411 |
| sp O60701 UGDH_HUMAN    | 0.05865097 | 0          |
| sp P84090 ERH_HUMAN     | 0.05871582 | 0          |
| sp Q9NSE4 SYIM_HUMAN    | 0.05878258 | 0.26665917 |
| sp Q9Y3C8 UFC1_HUMAN    | 0.0589695  | 0          |
| sp P62318-2 SMD3_HUMAN  | 0.05955124 | 0          |
| sp Q15942 ZYX_HUMAN     | 0.05965042 | 0.20404659 |
| sp O94973-2 AP2A2_HUMAN | 0.0598526  | 0.28377196 |
| sp P78417 GSTO1_HUMAN   | 0.06028557 | 0.30819008 |
| sp P35232 PHB_HUMAN     | 0.06056786 | 0.3516469  |
| sp P61225 RAP2B_HUMAN   | 0.06067085 | 0          |
| sp Q8TD19 NEK9_HUMAN    | 0.06069374 | 0          |
| sp O95861-4 BPNT1_HUMAN | 0.06074524 | 0          |
| sp P10155-3 RO60_HUMAN  | 0.06083679 | 0.2591514  |
| sp P10768 ESTD_HUMAN    | 0.06092072 | 0.26737198 |
| sp P17987 TCPA_HUMAN    | 0.06126213 | 0.03765291 |
| sp P12830 CADH1_HUMAN   | 0.06126976 | 0          |
| sp P60953 CDC42_HUMAN   | 0.06267929 | 0.06842031 |
| sp O95834 EMAL2_HUMAN   | 0.06279373 | 0          |
| sp Q9BS26 ERP44_HUMAN   | 0.06285858 | 0          |
| sp P11021 BIP_HUMAN     | 0.06287766 | 0.17886412 |
| sp P48681 NEST_HUMAN    | 0.06297112 | 0          |
| sp P68371 TBB4B_HUMAN   | 0.06346512 | 0          |
| sp O95831-3 AIFM1_HUMAN | 0.06350136 | 0          |
| sp P02675 FIBB_HUMAN    | 0.06351662 | 0.12625508 |
| sp Q96EP5-2 DAZP1_HUMAN | 0.06481934 | 0          |
| sp P48047 ATPO_HUMAN    | 0.06501389 | 0.21989624 |
| sp Q14112-2 NID2_HUMAN  | 0.06511307 | 0.02662771 |
| sp P84077 ARF1_HUMAN    | 0.06516647 | 0.06291623 |
| sp P35606-2 COPB2_HUMAN | 0.06537628 | 0.19818917 |
| sp Q9H3U1-2 UN45A_HUMAN | 0.06546783 | 0          |
| sp P09417 DHPR_HUMAN    | 0.06553268 | 0          |
| sp P22234-2 PUR6_HUMAN  | 0.06580734 | 0          |
| sp Q9UHQ9 NB5R1_HUMAN   | 0.0660286  | 0          |
| sp Q08431 MFGM_HUMAN    | 0.06607246 | 0.40256184 |
| sp P55735 SEC13_HUMAN   | 0.06641769 | 0          |

|                         |            |            |
|-------------------------|------------|------------|
| sp P21283 VATC1_HUMAN   | 0.0669632  | 0          |
| sp P18077 RL35A_HUMAN   | 0.06792641 | 0.19149946 |
| sp P50453 SPB9_HUMAN    | 0.06805611 | 0.01343579 |
| sp P22352 GPX3_HUMAN    | 0.06806946 | 0          |
| sp P62906 RL10A_HUMAN   | 0.06838417 | 0          |
| sp P05165-2 PCCA_HUMAN  | 0.06858063 | 0          |
| sp Q9NZL9-2 MAT2B_HUMAN | 0.06881332 | 0          |
| sp P14625 ENPL_HUMAN    | 0.06884956 | 0.2601681  |
| sp Q9UJW0-3 DCTN4_HUMAN | 0.06891441 | 0          |
| sp Q15084-5 PDIA6_HUMAN | 0.06954193 | 0.07131392 |
| sp Q9BUQ8 DDX23_HUMAN   | 0.06990624 | 0          |
| sp Q86WV6 STING_HUMAN   | 0.07000732 | 0          |
| sp P11766 ADHX_HUMAN    | 0.07005501 | 0.05387706 |
| sp P02794 FRIH_HUMAN    | 0.07018089 | 0          |
| sp Q7KZF4 SND1_HUMAN    | 0.07024574 | 0          |
| sp P18669 PGAM1_HUMAN   | 0.07079887 | 0.10280301 |
| sp Q9P2X0-2 DPM3_HUMAN  | 0.0708046  | 0          |
| sp P19338 NUCL_HUMAN    | 0.07111168 | 0.13374822 |
| sp O75746-2 CMC1_HUMAN  | 0.07116127 | 0          |
| sp P62826 RAN_HUMAN     | 0.0716629  | 0          |
| sp Q5SSJ5-2 HP1B3_HUMAN | 0.07176971 | 0.14927356 |
| sp P27361 MK03_HUMAN    | 0.07177353 | 0          |
| sp Q02878 RL6_HUMAN     | 0.07178688 | 0          |
| sp O43491 E41L2_HUMAN   | 0.07218933 | 0.02174174 |
| sp Q9NX63 MIC19_HUMAN   | 0.0723381  | 0          |
| sp O43776 SYNC_HUMAN    | 0.07250977 | 0          |
| sp P56537 IF6_HUMAN     | 0.0730648  | 0.40256184 |
| sp P47985 UCRI_HUMAN    | 0.07312012 | 0.2178309  |
| sp P48643 TCPE_HUMAN    | 0.07312393 | 0.14871502 |
| sp Q96HE7 ERO1A_HUMAN   | 0.0735321  | 0.09894868 |
| sp O00567 NOP56_HUMAN   | 0.07359505 | 0          |
| sp P63151-2 2ABA_HUMAN  | 0.07365799 | 0          |
| sp P11413-3 G6PD_HUMAN  | 0.07382011 | 0.01343579 |
| sp Q9P258 RCC2_HUMAN    | 0.07383728 | 0          |
| sp P55795 HNRH2_HUMAN   | 0.07424736 | 0          |
| sp Q96C19 EFHD2_HUMAN   | 0.07498741 | 0.06291623 |
| sp Q96TA1-2 NIBL1_HUMAN | 0.07521057 | 0          |
| sp P46976 GLYG_HUMAN    | 0.07565117 | 0.30372584 |
| sp Q14914-2 PTGR1_HUMAN | 0.07600403 | 0          |
| sp Q8WUY1 THEM6_HUMAN   | 0.07616997 | 0.2178309  |
| sp Q99714 HCD2_HUMAN    | 0.07623673 | 0.16702904 |
| sp P98095-2 FBLN2_HUMAN | 0.07711601 | 0.01551361 |
| sp P00338 LDHA_HUMAN    | 0.07722855 | 0          |
| sp P20339-2 RAB5A_HUMAN | 0.07762528 | 0          |
| sp O95340-2 PAPS2_HUMAN | 0.07837677 | 0          |

|                          |            |            |
|--------------------------|------------|------------|
| sp P51148-2 RAB5C_HUMAN  | 0.07847786 | 0.20467198 |
| sp Q9BUJ2-4 HNRL1_HUMAN  | 0.078825   | 0.24097534 |
| sp Q15637-3 SF01_HUMAN   | 0.07902145 | 0          |
| sp P48059-3 LIMS1_HUMAN  | 0.07912064 | 0          |
| sp P21912 SDHB_HUMAN     | 0.07996178 | 0          |
| sp Q15185-3 TEBP_HUMAN   | 0.08051491 | 0          |
| sp Q15417 CNN3_HUMAN     | 0.08053017 | 0          |
| sp Q07866-10 KLC1_HUMAN  | 0.0806427  | 0          |
| sp P02792 FRIL_HUMAN     | 0.08101082 | 0          |
| sp P46777 RL5_HUMAN      | 0.08114433 | 0          |
| sp P20618 PSB1_HUMAN     | 0.08125496 | 0          |
| sp Q9Y3D6 FIS1_HUMAN     | 0.08141804 | 0          |
| sp Q9P2M7 CING_HUMAN     | 0.08184147 | 0          |
| sp P46108 CRK_HUMAN      | 0.08195305 | 0          |
| sp Q96BW5-2 PTER_HUMAN   | 0.08200073 | 0          |
| sp Q13308-6 PTK7_HUMAN   | 0.08230972 | 0.2207585  |
| sp Q16576-2 RBBP7_HUMAN  | 0.08239746 | 0          |
| sp Q9BR76 COR1B_HUMAN    | 0.08240509 | 0          |
| sp P47756-2 CAPZB_HUMAN  | 0.08270073 | 0.31786543 |
| sp Q15370-2 ELOB_HUMAN   | 0.08307648 | 0          |
| sp P15144 AMPN_HUMAN     | 0.08320046 | 0.35193655 |
| sp O43837 IDH3B_HUMAN    | 0.08327675 | 0.09894868 |
| sp Q13557-10 KCC2D_HUMAN | 0.08366585 | 0          |
| sp Q8TBC4 UBA3_HUMAN     | 0.08375931 | 0          |
| sp Q08945 SSRP1_HUMAN    | 0.08408928 | 0.20467198 |
| sp Q9NRN5 OLFL3_HUMAN    | 0.08420563 | 0          |
| sp P30520 PURA2_HUMAN    | 0.08427429 | 0          |
| sp P19971 TYPH_HUMAN     | 0.08457947 | 0.9765129  |
| sp P55786 PSA_HUMAN      | 0.08464241 | 0.19276452 |
| sp Q9HAV0 GBB4_HUMAN     | 0.08483887 | 0          |
| sp Q02790 FKBP4_HUMAN    | 0.08503723 | 0.04454162 |
| sp P17301 ITA2_HUMAN     | 0.08506393 | 0          |
| sp Q9H3N1 TMX1_HUMAN     | 0.08511353 | 0          |
| sp O15372 EIF3H_HUMAN    | 0.08524513 | 0          |
| sp P36776-2 LONM_HUMAN   | 0.08535004 | 0          |
| sp Q13724-2 MOGS_HUMAN   | 0.08566856 | 0.06291623 |
| sp Q9UIJ7 KAD3_HUMAN     | 0.08631134 | 0          |
| sp P01860 IGHG3_HUMAN    | 0.08657455 | 0.14672586 |
| sp Q9H0E2 TOLIP_HUMAN    | 0.08667183 | 0.45033538 |
| sp Q9UNM6-2 PSD13_HUMAN  | 0.08668327 | 0          |
| sp P13073 COX41_HUMAN    | 0.08675385 | 0          |
| sp Q9Y3A5 SBDS_HUMAN     | 0.08681297 | 0.06291623 |
| sp Q92542 NICA_HUMAN     | 0.08685494 | 0.35795313 |
| sp Q86UX7-2 URP2_HUMAN   | 0.0874958  | 0.19852771 |
| sp P22392-2 NDKB_HUMAN   | 0.08755684 | 0.01819076 |

|                         |            |            |
|-------------------------|------------|------------|
| sp Q01105-2 SET_HUMAN   | 0.08774757 | 0.35795313 |
| sp P26599-2 PTBP1_HUMAN | 0.08837128 | 0          |
| sp P22897 MRC1_HUMAN    | 0.08843803 | 0.45546502 |
| sp Q53EL6-2 PDCD4_HUMAN | 0.08864212 | 0          |
| sp P62913 RL11_HUMAN    | 0.08882713 | 0.2178309  |
| sp P08294 SODE_HUMAN    | 0.08921433 | 0          |
| sp Q9BZQ8 NIBAN_HUMAN   | 0.08931923 | 0          |
| sp P49189 AL9A1_HUMAN   | 0.08943939 | 0          |
| sp Q9Y3F4-2 STRAP_HUMAN | 0.08987999 | 0          |
| sp Q8TAT6-2 NPL4_HUMAN  | 0.09014702 | 0          |
| sp Q93052 LPP_HUMAN     | 0.0903225  | 0          |
| sp Q01813 PFKAP_HUMAN   | 0.09037399 | 0          |
| sp Q9Y490 TLN1_HUMAN    | 0.09083176 | 0.31346214 |
| sp O95336 6PGL_HUMAN    | 0.09099579 | 0.11612091 |
| sp O75131 CPNE3_HUMAN   | 0.09101105 | 0.01551361 |
| sp P35580 MYH10_HUMAN   | 0.09104157 | 0.29888293 |
| sp P35555 FBN1_HUMAN    | 0.09129906 | 0.57848686 |
| sp Q13126-2 MTAP_HUMAN  | 0.09188843 | 0          |
| sp Q92817 EVPL_HUMAN    | 0.09188843 | 0.00842351 |
| sp Q7Z7G0 TARSH_HUMAN   | 0.09222031 | 0          |
| sp P55884-2 EIF3B_HUMAN | 0.0928154  | 0.37060758 |
| sp P68104 EF1A1_HUMAN   | 0.09283829 | 0.00764478 |
| sp Q00610-2 CLH1_HUMAN  | 0.09337616 | 0.15806404 |
| sp Q15582 BGH3_HUMAN    | 0.09342194 | 0.27351177 |
| sp Q13425 SNTB2_HUMAN   | 0.09349251 | 0          |
| sp P08237-3 PFKAM_HUMAN | 0.09384155 | 0          |
| sp Q13547 HDAC1_HUMAN   | 0.09444428 | 0          |
| sp P11142 HSP7C_HUMAN   | 0.0947094  | 0          |
| sp Q8TDZ2-4 MICA1_HUMAN | 0.09477425 | 0          |
| sp E9PAV3 NACAM_HUMAN   | 0.09501457 | 0          |
| sp Q92506 DHB8_HUMAN    | 0.09529114 | 0.19149946 |
| sp P62424 RL7A_HUMAN    | 0.09550285 | 0.24295025 |
| sp Q96AE4-2 FUBP1_HUMAN | 0.09566498 | 0.4546338  |
| sp Q6NVY1 HIBCH_HUMAN   | 0.0959301  | 0          |
| sp P62937 PPIA_HUMAN    | 0.09604836 | 0          |
| sp P13796 PLSL_HUMAN    | 0.09612656 | 0.28716654 |
| sp P49961 ENTP1_HUMAN   | 0.09698486 | 0.04454162 |
| sp P62136 PP1A_HUMAN    | 0.0970192  | 0          |
| sp O95782-2 AP2A1_HUMAN | 0.09708405 | 0.19149946 |
| sp Q9H4A4 AMPB_HUMAN    | 0.09711075 | 0.1556212  |
| sp P55036-2 PSMD4_HUMAN | 0.09733391 | 0          |
| sp P14317 HCLS1_HUMAN   | 0.09779358 | 0          |
| sp P51571 SSRD_HUMAN    | 0.09819794 | 0.09894868 |
| sp P49591 SYSC_HUMAN    | 0.09839249 | 0          |
| sp Q9BWM7 SFXN3_HUMAN   | 0.09849739 | 0          |

|                          |            |            |
|--------------------------|------------|------------|
| sp Q96C23 GALM_HUMAN     | 0.09855557 | 0          |
| sp P00738-2 HPT_HUMAN    | 0.09858131 | 0.5452582  |
| sp P61923-5 COPZ1_HUMAN  | 0.098629   | 0          |
| sp O60716-14 CTND1_HUMAN | 0.09872818 | 0          |
| sp O15031 PLXB2_HUMAN    | 0.09885788 | 0.2838047  |
| sp Q9Y2S2 CRYL1_HUMAN    | 0.09898186 | 0.21439649 |
| sp O75396 SC22B_HUMAN    | 0.09906006 | 0          |
| sp P46940 IQGA1_HUMAN    | 0.09915161 | 0.09832569 |
| sp P62888 RL30_HUMAN     | 0.09946251 | 0          |
| sp Q13464 ROCK1_HUMAN    | 0.09952164 | 0          |
| sp P25788-2 PSA3_HUMAN   | 0.09973145 | 0          |
| sp P31153 METK2_HUMAN    | 0.10010719 | 0          |
| sp Q9Y285 SYFA_HUMAN     | 0.1001358  | 0          |
| sp P63104 1433Z_HUMAN    | 0.10021019 | 0.01542275 |
| sp P40925-2 MDHC_HUMAN   | 0.10038185 | 0.01178462 |
| sp P16152 CBR1_HUMAN     | 0.10062408 | 0          |
| sp Q99426 TBCB_HUMAN     | 0.10071564 | 0          |
| sp P12814 ACTN1_HUMAN    | 0.10161591 | 0          |
| sp P30153 2AAA_HUMAN     | 0.10173416 | 0          |
| sp Q00796 DHSO_HUMAN     | 0.1017437  | 0          |
| sp O76003 GLRX3_HUMAN    | 0.10189056 | 0          |
| sp Q15029-2 U5S1_HUMAN   | 0.10219765 | 0.12893641 |
| sp P58546 MTPN_HUMAN     | 0.10245514 | 0          |
| sp Q8WUM4 PDC6I_HUMAN    | 0.10313034 | 0.12320797 |
| sp Q9ULA0 DNPEP_HUMAN    | 0.10323715 | 0.02174174 |
| sp P08571 CD14_HUMAN     | 0.10335922 | 0.20467198 |
| sp Q09028-3 RBBP4_HUMAN  | 0.10438538 | 0          |
| sp Q99436 PSB7_HUMAN     | 0.1043911  | 0.09894868 |
| sp P25787 PSA2_HUMAN     | 0.10449791 | 0.09339783 |
| sp Q15691 MARE1_HUMAN    | 0.10486984 | 0          |
| sp Q14204 DYHC1_HUMAN    | 0.10540772 | 0.02421166 |
| sp Q12907 LMAN2_HUMAN    | 0.10570908 | 0          |
| sp P48444 COPD_HUMAN     | 0.10570908 | 0.21287349 |
| sp Q7L2H7 EIF3M_HUMAN    | 0.10590172 | 0.5204253  |
| sp P61970 NTF2_HUMAN     | 0.10608101 | 0          |
| sp Q86UP2-4 KTN1_HUMAN   | 0.10622406 | 0          |
| sp O95479 G6PE_HUMAN     | 0.10625649 | 0.20467198 |
| sp P36955 PEDF_HUMAN     | 0.10642242 | 0          |
| sp P08397-2 HEM3_HUMAN   | 0.1065464  | 0          |
| sp Q92930 RAB8B_HUMAN    | 0.10659409 | 0          |
| sp P62495-2 ERF1_HUMAN   | 0.10716629 | 0.19149946 |
| sp Q9NRV9 HEBP1_HUMAN    | 0.1072731  | 0          |
| sp Q99798 ACON_HUMAN     | 0.10728264 | 0.07570045 |
| sp P55809 SCOT1_HUMAN    | 0.10798645 | 0          |
| sp Q9NYL9 TMOD3_HUMAN    | 0.10807419 | 0.33495146 |

|                           |            |            |
|---------------------------|------------|------------|
| sp Q15046-2 SYK_HUMAN     | 0.10836792 | 0          |
| sp Q9Y5S9-2 RBM8A_HUMAN   | 0.10866928 | 0.7061832  |
| sp P02747 C1QC_HUMAN      | 0.10870552 | 0          |
| sp Q08257 QOR_HUMAN       | 0.10913467 | 0.1791607  |
| sp P02671-2 FIBA_HUMAN    | 0.10933304 | 0.01437165 |
| sp Q12905 ILF2_HUMAN      | 0.10935211 | 0.15332921 |
| sp P42224-2 STAT1_HUMAN   | 0.10956001 | 0.02174174 |
| sp P07360 CO8G_HUMAN      | 0.10957909 | 0          |
| sp Q9UUK9 NUDT5_HUMAN     | 0.10979843 | 0.09894868 |
| sp P78527 PRKDC_HUMAN     | 0.10988617 | 0          |
| sp P51572-2 BAP31_HUMAN   | 0.11037445 | 0.23541966 |
| sp Q15124 PGM5_HUMAN      | 0.11067009 | 0.01189081 |
| sp Q8N1G4 LRC47_HUMAN     | 0.11081505 | 0.03367973 |
| sp P25789 PSA4_HUMAN      | 0.11083031 | 0.06986027 |
| sp P13639 EF2_HUMAN       | 0.11121368 | 0.16813631 |
| sp P02545 LMNA_HUMAN      | 0.1113205  | 0.01551361 |
| sp Q92499 DDX1_HUMAN      | 0.1114502  | 0.12756637 |
| sp P16070-16 CD44_HUMAN   | 0.11148453 | 0          |
| sp P35914 HMGCL_HUMAN     | 0.11152077 | 0.09894868 |
| sp P40429 RL13A_HUMAN     | 0.11291885 | 0          |
| sp O14672 ADA10_HUMAN     | 0.11303139 | 0          |
| sp P17174 AATC_HUMAN      | 0.11317825 | 0          |
| sp P35611-2 ADDA_HUMAN    | 0.11340332 | 0          |
| sp O75947-2 ATP5H_HUMAN   | 0.11355782 | 0.20467198 |
| sp P61018 RAB4B_HUMAN     | 0.11357307 | 0          |
| sp P01782 HV309_HUMAN     | 0.11370087 | 0          |
| sp Q13347 EIF3I_HUMAN     | 0.11396408 | 0          |
| sp P00558 PGK1_HUMAN      | 0.11434364 | 0.00473908 |
| sp P07305 H10_HUMAN       | 0.11436844 | 0.35795313 |
| sp Q9NR45 SIAS_HUMAN      | 0.11443901 | 0.20467198 |
| sp P07384 CAN1_HUMAN      | 0.11462784 | 0          |
| sp P20292 AL5AP_HUMAN     | 0.11472511 | 0          |
| sp Q8IV08 PLD3_HUMAN      | 0.11523438 | 0.48520416 |
| sp Q9Y5X3 SNX5_HUMAN      | 0.11540222 | 0.17171621 |
| sp P53396-2 ACLY_HUMAN    | 0.11558914 | 0.1242725  |
| sp P61247 RS3A_HUMAN      | 0.11568832 | 0          |
| sp P08236-2 BGLR_HUMAN    | 0.11611939 | 0.1342476  |
| sp P02649 APOE_HUMAN      | 0.11621285 | 0.34197828 |
| sp A0A0C4DH31 HV118_HUMAN | 0.1164856  | 0          |
| sp P42704 LPPRC_HUMAN     | 0.11654282 | 0          |
| sp Q6DD88 ATLA3_HUMAN     | 0.11655045 | 0.03367973 |
| sp Q92900-2 RENT1_HUMAN   | 0.11665726 | 0.1791607  |
| sp Q5JRX3-2 PREP_HUMAN    | 0.11710739 | 0          |
| sp P60981-2 DEST_HUMAN    | 0.1175499  | 0          |
| sp P31689 DNJA1_HUMAN     | 0.11793518 | 0.35795313 |



|                           |            |            |
|---------------------------|------------|------------|
| sp P00390-2 GSHR_HUMAN    | 0.11816979 | 0          |
| sp Q9NYU2-2 UGGG1_HUMAN   | 0.11903381 | 0.7121611  |
| sp O14818 PSA7_HUMAN      | 0.11923027 | 0          |
| sp Q92890-1 UFD1_HUMAN    | 0.1194973  | 0          |
| sp P62249 RS16_HUMAN      | 0.11953354 | 0.19149946 |
| sp Q8NF37 PCAT1_HUMAN     | 0.11955357 | 0.03367973 |
| sp Q9H3H3-1 CK068_HUMAN   | 0.11981201 | 0          |
| sp P04066 FUCO_HUMAN      | 0.11994553 | 0.45033538 |
| sp Q9Y262 EIF3L_HUMAN     | 0.11997604 | 0          |
| sp P52907 CAZA1_HUMAN     | 0.12018585 | 0.43103603 |
| sp Q15404 RSU1_HUMAN      | 0.12040901 | 0.08307569 |
| sp P08238 HS90B_HUMAN     | 0.12069321 | 0.41334116 |
| sp O60547-2 GMDS_HUMAN    | 0.12099648 | 0          |
| sp P30519 HMOX2_HUMAN     | 0.12103272 | 0.25789237 |
| sp P50552 VASP_HUMAN      | 0.12141037 | 0.04454162 |
| sp O60832-2 DKC1_HUMAN    | 0.12163544 | 0          |
| sp Q06124-2 PTN11_HUMAN   | 0.12164879 | 0          |
| sp Q8WXF1 PSPC1_HUMAN     | 0.12169075 | 0          |
| sp P13861 KAP2_HUMAN      | 0.12173462 | 0.22032139 |
| sp P31937 3HIDH_HUMAN     | 0.12177086 | 0          |
| sp P30533 AMRP_HUMAN      | 0.12236404 | 0          |
| sp Q16647 PTGIS_HUMAN     | 0.12253952 | 0          |
| sp P12235 ADT1_HUMAN      | 0.12263298 | 0          |
| sp P62854 RS26_HUMAN      | 0.12265205 | 0          |
| sp Q13098-5 CSN1_HUMAN    | 0.12302017 | 0.04454162 |
| sp Q92841-1 DDX17_HUMAN   | 0.12321281 | 0          |
| sp Q9P265 DIP2B_HUMAN     | 0.12343025 | 0          |
| sp P30084 ECHM_HUMAN      | 0.1235199  | 0          |
| sp P01780 HV307_HUMAN     | 0.12398529 | 0          |
| sp Q6WCQ1-2 MPRIP_HUMAN   | 0.12406921 | 0.38617682 |
| sp Q92882 OSTF1_HUMAN     | 0.12434197 | 0.06291623 |
| sp P27338 AOFB_HUMAN      | 0.12434578 | 0.01178462 |
| sp P50991 TCPD_HUMAN      | 0.12492561 | 0.17006111 |
| sp Q9H4G4 GAPR1_HUMAN     | 0.12501144 | 0          |
| sp O94832 MYO1D_HUMAN     | 0.12517166 | 0          |
| sp Q5VW32 BROX_HUMAN      | 0.1257801  | 0          |
| sp P48147 PPCE_HUMAN      | 0.1261406  | 0.05483269 |
| sp P02748 CO9_HUMAN       | 0.12615585 | 0.14750385 |
| sp Q8IZ83-3 A16A1_HUMAN   | 0.1261921  | 0.07727676 |
| sp Q13310-2 PABP4_HUMAN   | 0.12673378 | 0          |
| sp A0A0C4DH25 KVD20_HUMAN | 0.1267891  | 0          |
| sp Q8NHP8 PLBL2_HUMAN     | 0.12719727 | 0          |
| sp Q9Y5P6-2 GMPPB_HUMAN   | 0.12752724 | 0          |
| sp Q7Z6Z7-2 HUWE1_HUMAN   | 0.12787819 | 0          |
| sp P62701 RS4X_HUMAN      | 0.12789154 | 0.8983557  |

|                         |            |            |
|-------------------------|------------|------------|
| sp P13667 PDIA4_HUMAN   | 0.12792778 | 0.17653626 |
| sp O95394-3 AGM1_HUMAN  | 0.12798691 | 0          |
| sp P09651-3 ROA1_HUMAN  | 0.12817764 | 0.04454162 |
| sp P63027 VAMP2_HUMAN   | 0.12822914 | 0          |
| sp Q9BUF5 TBB6_HUMAN    | 0.12824821 | 0          |
| sp Q14974 IMB1_HUMAN    | 0.12840271 | 0          |
| sp P60660-2 MYL6_HUMAN  | 0.12846756 | 0.06842031 |
| sp P27348 1433T_HUMAN   | 0.12852097 | 0          |
| sp Q9P0L0-2 VAPA_HUMAN  | 0.12866783 | 0.44572112 |
| sp P13693 TCTP_HUMAN    | 0.12907791 | 0          |
| sp P14174 MIF_HUMAN     | 0.12907791 | 0          |
| sp Q9Y230 RUVB2_HUMAN   | 0.1298523  | 0          |
| sp Q13148 TADBP_HUMAN   | 0.12998009 | 0.09894868 |
| sp Q9UBV8 PEF1_HUMAN    | 0.13002396 | 0          |
| sp P50570-5 DYN2_HUMAN  | 0.1304512  | 0.18414244 |
| sp P35268 RL22_HUMAN    | 0.13089752 | 0.06291623 |
| sp Q96QK1 VPS35_HUMAN   | 0.13160324 | 0.41804093 |
| sp Q96KP4 CNDP2_HUMAN   | 0.13173676 | 0.03138232 |
| sp P00325 ADH1B_HUMAN   | 0.13199234 | 0.5886828  |
| sp P30086 PEBP1_HUMAN   | 0.132164   | 0.20467198 |
| sp P46459 NSF_HUMAN     | 0.13249588 | 0          |
| sp P33176 KINH_HUMAN    | 0.13259697 | 0.21133235 |
| sp P49720 PSB3_HUMAN    | 0.13298607 | 0.4075265  |
| sp P49368 TCPG_HUMAN    | 0.13309288 | 0.28377232 |
| sp Q9Y696 CLIC4_HUMAN   | 0.13314629 | 0          |
| sp P25786-2 PSA1_HUMAN  | 0.13315392 | 0.06210651 |
| sp Q93009-3 UBP7_HUMAN  | 0.13316345 | 0          |
| sp Q9H0R4 HDHD2_HUMAN   | 0.13393593 | 0          |
| sp P60891 PRPS1_HUMAN   | 0.1340847  | 0          |
| sp P26368-2 U2AF2_HUMAN | 0.13432884 | 0.7061832  |
| sp P18085 ARF4_HUMAN    | 0.13444519 | 0.7827403  |
| sp P53621-2 COPA_HUMAN  | 0.13453293 | 0          |
| sp O15382 BCAT2_HUMAN   | 0.13466263 | 0          |
| sp P46939-2 UTRO_HUMAN  | 0.13513947 | 1.019293   |
| sp P31948 STIP1_HUMAN   | 0.13515472 | 0          |
| sp Q13363 CTBP1_HUMAN   | 0.13537025 | 0          |
| sp O15511 ARPC5_HUMAN   | 0.13604355 | 0.45563722 |
| sp P62081 RS7_HUMAN     | 0.13617134 | 0.28516325 |
| sp O00232 PSD12_HUMAN   | 0.13714314 | 0.316588   |
| sp P08133 ANXA6_HUMAN   | 0.13827324 | 0.15771674 |
| sp P23142 FBLN1_HUMAN   | 0.1385231  | 0          |
| sp P00491 PNPH_HUMAN    | 0.13855171 | 0.14672586 |
| sp Q71U36-2 TBA1A_HUMAN | 0.13899231 | 0          |
| sp P49915-2 GUAA_HUMAN  | 0.13899803 | 0          |
| sp Q9Y678 COPG1_HUMAN   | 0.13906288 | 0.09960519 |

|                         |            |            |
|-------------------------|------------|------------|
| sp Q9BT78 CSN4_HUMAN    | 0.13944054 | 0.24097534 |
| sp Q9UHB6-4 LIMA1_HUMAN | 0.1395626  | 0.20467198 |
| sp Q13409-2 DC1I2_HUMAN | 0.13964748 | 0.06986027 |
| sp Q6P2Q9 PRP8_HUMAN    | 0.14004898 | 0          |
| sp P49419-2 AL7A1_HUMAN | 0.14018631 | 0.02410217 |
| sp P00751 CFAB_HUMAN    | 0.14069366 | 0.02866885 |
| sp Q9Y6W5 WASF2_HUMAN   | 0.14110756 | 0.3005443  |
| sp Q96M27-3 PRRC1_HUMAN | 0.14166832 | 0.19149946 |
| sp Q9BVK6 TMED9_HUMAN   | 0.14188766 | 0          |
| sp P10606 COX5B_HUMAN   | 0.1418953  | 0.06291623 |
| sp Q12906-2 ILF3_HUMAN  | 0.14201736 | 0          |
| sp Q6KB66-2 K2C80_HUMAN | 0.14237595 | 0          |
| sp Q16775-2 GLO2_HUMAN  | 0.14277458 | 0          |
| sp Q9NUJ1 ABHDA_HUMAN   | 0.14279747 | 0.45033538 |
| sp P63279 UBC9_HUMAN    | 0.14311218 | 0          |
| sp P62314 SMD1_HUMAN    | 0.14340878 | 0.45033538 |
| sp P50579-2 MAP2_HUMAN  | 0.14354515 | 0.7061832  |
| sp Q9BTV4 TMM43_HUMAN   | 0.14391708 | 0.44572112 |
| sp Q9UKG1 DP13A_HUMAN   | 0.14430428 | 0          |
| sp P60033 CD81_HUMAN    | 0.14437103 | 0.45033538 |
| sp P07737 PROF1_HUMAN   | 0.14471245 | 0.07367946 |
| sp Q7Z3D6-3 GLUCM_HUMAN | 0.1447277  | 0          |
| sp P50454 SERPH_HUMAN   | 0.14475441 | 0.0846519  |
| sp P40306 PSB10_HUMAN   | 0.14476776 | 0.28516325 |
| sp P00746 CFAD_HUMAN    | 0.1451397  | 0          |
| sp Q99497 PARK7_HUMAN   | 0.14624023 | 0.17511293 |
| sp Q1KMD3 HNRL2_HUMAN   | 0.14635468 | 0.06644611 |
| sp P27797 CALR_HUMAN    | 0.14638138 | 0.2699497  |
| sp Q13561-2 DCTN2_HUMAN | 0.14639664 | 0          |
| sp Q16539-2 MK14_HUMAN  | 0.14666176 | 0          |
| sp P35998 PRS7_HUMAN    | 0.14679718 | 0.20174193 |
| sp P08621-2 RU17_HUMAN  | 0.14701653 | 0          |
| sp P11217-2 PYGM_HUMAN  | 0.14731789 | 0          |
| sp P53618 COPB_HUMAN    | 0.14769554 | 0.2718748  |
| sp P02746 C1QB_HUMAN    | 0.14808655 | 0          |
| sp P53992 SC24C_HUMAN   | 0.14824295 | 0          |
| sp Q8WVM8 SCFD1_HUMAN   | 0.1484108  | 0          |
| sp Q9Y3B3 TMED7_HUMAN   | 0.14879227 | 0          |
| sp P61088 UBE2N_HUMAN   | 0.14937592 | 0.656254   |
| sp P49411 EFTU_HUMAN    | 0.14958954 | 0.07841589 |
| sp O00116 ADAS_HUMAN    | 0.14964104 | 0          |
| sp P62829 RL23_HUMAN    | 0.14967155 | 0          |
| sp Q15233 NONO_HUMAN    | 0.15001488 | 0.04817784 |
| sp P27694 RFA1_HUMAN    | 0.15039253 | 0          |
| sp Q9UEY8 ADDG_HUMAN    | 0.15048599 | 0.05483269 |

|                         |            |            |
|-------------------------|------------|------------|
| sp Q3LXA3 TKFC_HUMAN    | 0.15092278 | 0          |
| sp P28062-2 PSB8_HUMAN  | 0.1511612  | 0.5111962  |
| sp P37802 TAGL2_HUMAN   | 0.15117645 | 0.03208591 |
| sp Q9NZ01 TECR_HUMAN    | 0.15149212 | 0          |
| sp P10643 CO7_HUMAN     | 0.15197754 | 0          |
| sp Q8TE77-3 SSH3_HUMAN  | 0.1529541  | 0          |
| sp P27816-2 MAP4_HUMAN  | 0.15299988 | 0          |
| sp Q9Y4D7-2 PLXD1_HUMAN | 0.1534853  | 0          |
| sp O14950 ML12B_HUMAN   | 0.15365219 | 0          |
| sp Q96CN7 ISOC1_HUMAN   | 0.15366364 | 0.24097534 |
| sp P29144 TPP2_HUMAN    | 0.15380669 | 0          |
| sp P62269 RS18_HUMAN    | 0.15443039 | 1.0485198  |
| sp P62333 PRS10_HUMAN   | 0.15485764 | 0          |
| sp O00487 PSDE_HUMAN    | 0.15506554 | 0          |
| sp P00568 KAD1_HUMAN    | 0.15527153 | 0.04817784 |
| sp P08865 RSSA_HUMAN    | 0.1556549  | 0.04817784 |
| sp P48668 K2C6C_HUMAN   | 0.15607262 | 0.33495146 |
| sp P60842 IF4A1_HUMAN   | 0.15628433 | 0.01178462 |
| sp Q9HC35-2 EMAL4_HUMAN | 0.15666962 | 0.356152   |
| sp Q9NUQ9 FA49B_HUMAN   | 0.15686035 | 0.30372584 |
| sp P40763-2 STAT3_HUMAN | 0.15698624 | 0.40787253 |
| sp Q96FW1 OTUB1_HUMAN   | 0.15729523 | 0          |
| sp Q16543 CDC37_HUMAN   | 0.15735817 | 0          |
| sp Q8WXF7-2 ATLA1_HUMAN | 0.15738106 | 0          |
| sp P01624 KV315_HUMAN   | 0.15765762 | 0.45033538 |
| sp Q13838-2 DX39B_HUMAN | 0.1577549  | 0.06986027 |
| sp P61457 PHS_HUMAN     | 0.15788269 | 0.19149946 |
| sp P0DOX7 IGK_HUMAN     | 0.15815163 | 0.19149946 |
| sp O00571-2 DDX3X_HUMAN | 0.15830421 | 0          |
| sp P28838-2 AMPL_HUMAN  | 0.1587944  | 0.18313305 |
| sp P21281 VATB2_HUMAN   | 0.15921974 | 0.8706143  |
| sp P13746 1A11_HUMAN    | 0.15927696 | 0.7827403  |
| sp Q9UMS4 PRP19_HUMAN   | 0.15937042 | 0          |
| sp Q9Y315 DEOC_HUMAN    | 0.15950394 | 0          |
| sp P34896-2 GLYC_HUMAN  | 0.15960503 | 0.5111962  |
| sp Q13045-3 FLII_HUMAN  | 0.15986633 | 0.29066643 |
| sp P06756-3 ITAV_HUMAN  | 0.1599865  | 0.23973103 |
| sp O95373 IPO7_HUMAN    | 0.16041279 | 0.45033538 |
| sp Q13188 STK3_HUMAN    | 0.16043758 | 0          |
| sp Q99873-2 ANM1_HUMAN  | 0.1604557  | 0          |
| sp Q99758 ABCA3_HUMAN   | 0.1604805  | 0.19410844 |
| sp P48637 GSHB_HUMAN    | 0.16068077 | 0.24613085 |
| sp O75368 SH3L1_HUMAN   | 0.16140938 | 0          |
| sp P54802 ANAG_HUMAN    | 0.16149902 | 0.43633315 |
| sp P63241 IF5A1_HUMAN   | 0.16177368 | 0.8983557  |

|                         |            |            |
|-------------------------|------------|------------|
| sp P48163 MAOX_HUMAN    | 0.16192245 | 0.6509351  |
| sp P62191-2 PR54_HUMAN  | 0.16195107 | 0.1342476  |
| sp Q9BVC6 TM109_HUMAN   | 0.1621933  | 0.5204253  |
| sp P27487 DPP4_HUMAN    | 0.16226959 | 0.1558116  |
| sp P50440-3 GATM_HUMAN  | 0.162817   | 0.45033538 |
| sp Q14498-2 RBM39_HUMAN | 0.16312218 | 0.40256184 |
| sp P31150 GDIA_HUMAN    | 0.16324615 | 0          |
| sp Q7Z5L7-2 PODN_HUMAN  | 0.1633358  | 0          |
| sp P06310 KV230_HUMAN   | 0.16343117 | 0          |
| sp P61601 NCALD_HUMAN   | 0.16374111 | 0          |
| sp P29350-4 PTN6_HUMAN  | 0.16388893 | 0.21719235 |
| sp Q96S97 MYADM_HUMAN   | 0.1639061  | 0          |
| sp Q8NBJ7 SUMF2_HUMAN   | 0.16399956 | 0.1342476  |
| sp P62851 RS25_HUMAN    | 0.16444969 | 1.1932944  |
| sp Q16822 PCKGM_HUMAN   | 0.1646576  | 0.04454162 |
| sp Q16851-2 UGPA_HUMAN  | 0.16479492 | 0.11768232 |
| sp P55060-3 XPO2_HUMAN  | 0.16480255 | 0          |
| sp Q9BRA2 TXD17_HUMAN   | 0.16549301 | 0          |
| sp P09104-2 ENOG_HUMAN  | 0.16604996 | 0          |
| sp Q9BZZ5-3 API5_HUMAN  | 0.16605186 | 0.04454162 |
| sp Q9C0C2-2 TB182_HUMAN | 0.16621017 | 0          |
| sp P29401-2 TKT_HUMAN   | 0.16700554 | 0.05702926 |
| sp Q14764 MVP_HUMAN     | 0.16703796 | 0.11168098 |
| sp Q13642-1 FHL1_HUMAN  | 0.16710854 | 0          |
| sp P23946 CMA1_HUMAN    | 0.16713715 | 0.40256184 |
| sp P22061-2 PIMT_HUMAN  | 0.16728592 | 0.19410844 |
| sp Q9UHB9-4 SRP68_HUMAN | 0.16768265 | 0          |
| sp Q99623 PHB2_HUMAN    | 0.16775513 | 0.694615   |
| sp Q9HCB6 SPON1_HUMAN   | 0.16854286 | 0.00900315 |
| sp Q96HD1-2 CREL1_HUMAN | 0.16856575 | 0.7827403  |
| sp A0AVT1 UBA6_HUMAN    | 0.16866302 | 0          |
| sp P61353 RL27_HUMAN    | 0.16867828 | 0.5204253  |
| sp P07203 GPX1_HUMAN    | 0.16873169 | 0.3005443  |
| sp P25325-2 THTM_HUMAN  | 0.16882706 | 0.25789237 |
| sp Q9UNF0-2 PACN2_HUMAN | 0.16903687 | 0          |
| sp Q6XQN6 PNCB_HUMAN    | 0.16942406 | 0.15517515 |
| sp P11177-3 ODPB_HUMAN  | 0.16973877 | 0          |
| sp Q969V3-2 NCLN_HUMAN  | 0.17005157 | 0          |
| sp Q5K4L6-2 S27A3_HUMAN | 0.17039204 | 0          |
| sp Q5TFE4 NT5D1_HUMAN   | 0.17056465 | 0          |
| sp P30101 PDIA3_HUMAN   | 0.1706562  | 0.6213773  |
| sp Q96CX2 KCD12_HUMAN   | 0.17203903 | 0          |
| sp P20338 RAB4A_HUMAN   | 0.172081   | 0          |
| sp Q9UBS4 DJB11_HUMAN   | 0.17224312 | 0          |
| sp Q92947 GCDH_HUMAN    | 0.17232513 | 0          |

|                         |            |            |
|-------------------------|------------|------------|
| sp Q63ZY3-3 KANK2_HUMAN | 0.17242813 | 0.5538428  |
| sp P06753-2 TPM3_HUMAN  | 0.17256165 | 0.00934436 |
| sp O14617-4 AP3D1_HUMAN | 0.17288017 | 0          |
| sp Q9UHX1-2 PUF60_HUMAN | 0.17323112 | 0          |
| sp Q2TAY7 SMU1_HUMAN    | 0.17338371 | 0          |
| sp P50452 SPB8_HUMAN    | 0.17377472 | 0          |
| sp P55327-3 TPD52_HUMAN | 0.17412567 | 0.2178309  |
| sp Q06210-2 GFPT1_HUMAN | 0.17416191 | 0.05681695 |
| sp O43148-2 MCES_HUMAN  | 0.17417526 | 0.45033538 |
| sp Q15019-2 SEPT2_HUMAN | 0.17417908 | 0.3812125  |
| sp Q5TDH0-3 DDI2_HUMAN  | 0.17428398 | 0.06291623 |
| sp Q9NTK5 OLA1_HUMAN    | 0.174963   | 0.6298893  |
| sp Q96RF0-2 SNX18_HUMAN | 0.17496872 | 0.45033538 |
| sp P11586 C1TC_HUMAN    | 0.1750145  | 0.11612091 |
| sp P07357 CO8A_HUMAN    | 0.17515945 | 0.34137914 |
| sp P15428-5 PGDH_HUMAN  | 0.1757412  | 0.09894868 |
| sp P21333-2 FLNA_HUMAN  | 0.17578125 | 0.4486304  |
| sp P78371 TCPB_HUMAN    | 0.17579079 | 0.01888734 |
| sp O94811 TPPP_HUMAN    | 0.1759119  | 0          |
| sp P55084 ECHB_HUMAN    | 0.17599297 | 0.7118947  |
| sp Q86VS8 HOOK3_HUMAN   | 0.17634583 | 0          |
| sp P52566 GDIR2_HUMAN   | 0.17639732 | 0          |
| sp P12956 XRCC6_HUMAN   | 0.17679405 | 0.23970154 |
| sp P55209-2 NP1L1_HUMAN | 0.1770668  | 0          |
| sp Q6DKJ4 NXN_HUMAN     | 0.1773529  | 0          |
| sp O14964-2 HGS_HUMAN   | 0.17785263 | 0          |
| sp P62266 RS23_HUMAN    | 0.1783371  | 0.35795313 |
| sp Q04206-3 TF65_HUMAN  | 0.1783514  | 0          |
| sp O43681 ASNA_HUMAN    | 0.17842484 | 0          |
| sp P30085 KCY_HUMAN     | 0.17847061 | 0          |
| sp P18124 RL7_HUMAN     | 0.17853546 | 0.5032694  |
| sp Q9UGI8-2 TES_HUMAN   | 0.17863846 | 0.04454162 |
| sp P16615 AT2A2_HUMAN   | 0.17863846 | 0.5717351  |
| sp Q03154-4 ACY1_HUMAN  | 0.17923641 | 0.3005443  |
| sp P24534 EF1B_HUMAN    | 0.17992783 | 0.35795313 |
| sp Q9NY33 DPP3_HUMAN    | 0.18068123 | 0.4087177  |
| sp P62736 ACTA_HUMAN    | 0.18072224 | 0.01888734 |
| sp O00410 IPO5_HUMAN    | 0.18083191 | 0.7217418  |
| sp P23142-4 FBLN1_HUMAN | 0.18107224 | 0          |
| sp P02511 CRYAB_HUMAN   | 0.18114662 | 0          |
| sp P14678 RSMB_HUMAN    | 0.1819706  | 0.45033538 |
| sp Q27J81-2 INF2_HUMAN  | 0.18200874 | 0.28516325 |
| sp Q15121 PEA15_HUMAN   | 0.18217087 | 0.2178309  |
| sp P06681 CO2_HUMAN     | 0.18219376 | 0.29934928 |
| sp Q13496 MTM1_HUMAN    | 0.18238449 | 0          |

|                         |            |            |
|-------------------------|------------|------------|
| sp Q16891-2 MIC60_HUMAN | 0.18252373 | 0.02174174 |
| sp P26373 RL13_HUMAN    | 0.1830864  | 0.4075265  |
| sp Q99439 CNN2_HUMAN    | 0.18348503 | 0          |
| sp P53004 BIEA_HUMAN    | 0.1835556  | 0          |
| sp Q15631 TSN_HUMAN     | 0.18361282 | 0          |
| sp P30041 PRDX6_HUMAN   | 0.1836834  | 0.22784016 |
| sp P0DP03 HV335_HUMAN   | 0.1842537  | 0.45033538 |
| sp O94826 TOM70_HUMAN   | 0.18439102 | 0          |
| sp Q16401-2 PSMD5_HUMAN | 0.18458176 | 0.30819008 |
| sp P54886-2 P5CS_HUMAN  | 0.18480492 | 0          |
| sp Q8NBJ5 GT251_HUMAN   | 0.18501472 | 0.61034113 |
| sp P11940-2 PABP1_HUMAN | 0.18563461 | 0.2022302  |
| sp Q9H008 LHPP_HUMAN    | 0.18650436 | 0          |
| sp Q92696 PGTA_HUMAN    | 0.18691254 | 0          |
| sp P19404 NDUV2_HUMAN   | 0.18764687 | 0          |
| sp O14558 HSPB6_HUMAN   | 0.18797207 | 0.1342476  |
| sp Q96IJ6-2 GMPPA_HUMAN | 0.18797684 | 0.48520416 |
| sp Q7L1Q6-2 BZW1_HUMAN  | 0.1885891  | 0.1342476  |
| sp P04632 CPNS1_HUMAN   | 0.18891525 | 0.52598757 |
| sp P31939 PUR9_HUMAN    | 0.18894196 | 0.33213052 |
| sp P21399 ACOC_HUMAN    | 0.18906212 | 0.26737198 |
| sp Q9UH65 SWP70_HUMAN   | 0.1895771  | 0          |
| sp P01911 2B1F_HUMAN    | 0.18989563 | 0          |
| sp P39656-3 OST48_HUMAN | 0.19059181 | 1.1344727  |
| sp P50914 RL14_HUMAN    | 0.19086075 | 0.2178309  |
| sp O94788-4 AL1A2_HUMAN | 0.19105911 | 0          |
| sp P39687 AN32A_HUMAN   | 0.19112015 | 0          |
| sp P10523 ARRS_HUMAN    | 0.19165993 | 0.656254   |
| sp P49959-3 MRE11_HUMAN | 0.19208145 | 0          |
| sp Q9H0D6 XRN2_HUMAN    | 0.19330978 | 0.45563722 |
| sp P02753 RET4_HUMAN    | 0.19359207 | 0          |
| sp O14579 COPE_HUMAN    | 0.19364357 | 0.11612091 |
| sp P27635 RL10_HUMAN    | 0.19372177 | 0.61034113 |
| sp P22314-2 UBA1_HUMAN  | 0.19376945 | 0.12252306 |
| sp P61956-2 SUMO2_HUMAN | 0.19382095 | 0          |
| sp Q15661 TRYB1_HUMAN   | 0.19398117 | 0.13604218 |
| sp P50225 ST1A1_HUMAN   | 0.19411278 | 0.35795313 |
| sp P51858 HDGF_HUMAN    | 0.19427872 | 0          |
| sp O75306-2 NDUS2_HUMAN | 0.19436073 | 0.09894868 |
| sp Q96DG6 CMBL_HUMAN    | 0.19447136 | 0          |
| sp P68366-2 TBA4A_HUMAN | 0.19459534 | 0          |
| sp P31942-2 HNRH3_HUMAN | 0.19482231 | 0.7498006  |
| sp P60983 GMFB_HUMAN    | 0.19499207 | 0          |
| sp P07741 APT_HUMAN     | 0.19506454 | 0.04454162 |
| sp Q99598 TSNAX_HUMAN   | 0.19517517 | 0.09894868 |

|                         |            |            |
|-------------------------|------------|------------|
| sp P49755 TMEDA_HUMAN   | 0.1953106  | 0.29066643 |
| sp Q02952-2 AKA12_HUMAN | 0.19578362 | 0.7827403  |
| sp P13010 XRCC5_HUMAN   | 0.19595718 | 0.24452867 |
| sp Q9Y3Z3 SAMH1_HUMAN   | 0.19641304 | 0          |
| sp P52306 GDS1_HUMAN    | 0.1968689  | 0          |
| sp O75116 ROCK2_HUMAN   | 0.19695282 | 0          |
| sp Q9UBI6 GBG12_HUMAN   | 0.19713974 | 0.19149946 |
| sp P25311 ZA2G_HUMAN    | 0.1972313  | 0.09339783 |
| sp P14618-2 KPYM_HUMAN  | 0.19723892 | 0.29066643 |
| sp Q9UBF2 COPG2_HUMAN   | 0.1972866  | 0.2178309  |
| sp Q9H3K6-2 BOLA2_HUMAN | 0.19737244 | 0          |
| sp Q14108-2 SCR2_HUMAN  | 0.19755745 | 0.19149946 |
| sp Q96HY6 DDR2_HUMAN    | 0.19806099 | 0.30372584 |
| sp Q7Z7H5-3 TMED4_HUMAN | 0.19816971 | 0          |
| sp P14923 PLAK_HUMAN    | 0.19826317 | 0          |
| sp Q14980-2 NUMA1_HUMAN | 0.1988926  | 0.63199323 |
| sp Q16181-2 SEPT7_HUMAN | 0.19943237 | 0.1017544  |
| sp P62857 RS28_HUMAN    | 0.19986725 | 0          |
| sp O96009 NAPSA_HUMAN   | 0.2002449  | 1.0634323  |
| sp Q9Y4L1 HYOU1_HUMAN   | 0.20067978 | 0.4378217  |
| sp Q96G03 PGM2_HUMAN    | 0.20082474 | 0.51870745 |
| sp P30566 PUR8_HUMAN    | 0.20121574 | 0.35795313 |
| sp P09874 PARP1_HUMAN   | 0.20191574 | 0.47871065 |
| sp O00478-2 BT3A3_HUMAN | 0.20253754 | 0.19149946 |
| sp Q9UBQ7 GRHRP_HUMAN   | 0.2026825  | 0.09894868 |
| sp P00966 ASSY_HUMAN    | 0.20328331 | 0          |
| sp Q13435 SF3B2_HUMAN   | 0.20432281 | 0          |
| sp Q9UNZ2-5 NSF1C_HUMAN | 0.20435905 | 0.27902296 |
| sp Q15436 SC23A_HUMAN   | 0.20482635 | 0.09339783 |
| sp P40939 ECHA_HUMAN    | 0.20495796 | 0.6942292  |
| sp P52597 HNRPF_HUMAN   | 0.20555878 | 0.04454162 |
| sp Q96BM9 ARL8A_HUMAN   | 0.20648193 | 0          |
| sp Q14BN4-2 SLMAP_HUMAN | 0.20676231 | 0          |
| sp P49354 FNNTA_HUMAN   | 0.20732117 | 1.1505735  |
| sp Q13177 PAK2_HUMAN    | 0.2077694  | 0          |
| sp P24666-2 PPAC_HUMAN  | 0.20807171 | 0.2178309  |
| sp Q9BRF8 CPPED_HUMAN   | 0.20828629 | 0          |
| sp Q13488 VPP3_HUMAN    | 0.20840073 | 0.09894868 |
| sp P62753 RS6_HUMAN     | 0.20856667 | 0.35193655 |
| sp Q9Y265 RUVB1_HUMAN   | 0.20879745 | 0          |
| sp P26640 SYVC_HUMAN    | 0.20883942 | 0.31759265 |
| sp P33316 DUT_HUMAN     | 0.2088852  | 0          |
| sp O00303 EIF3F_HUMAN   | 0.20911598 | 0.5692702  |
| sp Q9UKV3-5 ACINU_HUMAN | 0.20917511 | 1.2095301  |
| sp O95372 LYPA2_HUMAN   | 0.20920563 | 0          |



|                         |            |            |
|-------------------------|------------|------------|
| sp Q12805-2 FBLN3_HUMAN | 0.20944214 | 0.4301026  |
| sp Q9NR19-2 ACSA_HUMAN  | 0.20993423 | 0          |
| sp Q9UBT2 SAE2_HUMAN    | 0.21095085 | 0.34323573 |
| sp P22059 OSBP1_HUMAN   | 0.21105385 | 0          |
| sp O60749-2 SNX2_HUMAN  | 0.21106529 | 0.03712561 |
| sp P12268 IMDH2_HUMAN   | 0.21128464 | 0.33495146 |
| sp Q96IU4 ABHEB_HUMAN   | 0.21172333 | 0.312067   |
| sp P13798 ACPH_HUMAN    | 0.21183968 | 0.2174103  |
| sp O75155 CAND2_HUMAN   | 0.2118454  | 0.656254   |
| sp P50502 F10A1_HUMAN   | 0.2118988  | 0.52598757 |
| sp Q9NZU5 LMCD1_HUMAN   | 0.21191216 | 0          |
| sp O60763-2 USO1_HUMAN  | 0.21193314 | 0.14338206 |
| sp Q13438-4 OS9_HUMAN   | 0.21309662 | 0.7827403  |
| sp O14791-2 APOL1_HUMAN | 0.21347904 | 0.19149946 |
| sp Q16555 DPYL2_HUMAN   | 0.21391487 | 0.43348378 |
| sp P14207 FOLR2_HUMAN   | 0.21403599 | 0.19149946 |
| sp Q99832 TCPH_HUMAN    | 0.214365   | 0          |
| sp P23528 COF1_HUMAN    | 0.2143898  | 0.20174193 |
| sp Q9UBG0 MRC2_HUMAN    | 0.21456909 | 0.2591514  |
| sp O43390-2 HNRPR_HUMAN | 0.21466827 | 0.984558   |
| sp Q00341 VIGLN_HUMAN   | 0.21529198 | 0.7498006  |
| sp P46109 CRKL_HUMAN    | 0.2153759  | 0.09894868 |
| sp O94776 MTA2_HUMAN    | 0.21562576 | 0          |
| sp Q92945 FUBP2_HUMAN   | 0.21606827 | 0.7259058  |
| sp Q5T013-4 HYI_HUMAN   | 0.21646118 | 0.2178309  |
| sp P11498 PYC_HUMAN     | 0.21711922 | 0.312067   |
| sp P04003 C4BPA_HUMAN   | 0.21757889 | 0.368128   |
| sp P07814 SYEP_HUMAN    | 0.21759987 | 0.54838234 |
| sp P07437 TBB5_HUMAN    | 0.21766663 | 0.06291623 |
| sp P11678 PERE_HUMAN    | 0.21773338 | 0          |
| sp P39059 COFA1_HUMAN   | 0.21779823 | 0.30372584 |
| sp Q9Y376 CAB39_HUMAN   | 0.21825027 | 0.28516325 |
| sp O43294 TGFI1_HUMAN   | 0.21877861 | 0.1342476  |
| sp Q96JB5-4 CK5P3_HUMAN | 0.21882248 | 0.06291623 |
| sp P50395 GDIB_HUMAN    | 0.21931076 | 0.23508528 |
| sp P67936 TPM4_HUMAN    | 0.21975899 | 0.16702904 |
| sp Q9BW30 TPPP3_HUMAN   | 0.22031975 | 0          |
| sp P49756 RBM25_HUMAN   | 0.22051048 | 0.19149946 |
| sp Q53GG5-2 PDLI3_HUMAN | 0.22098732 | 0.2178309  |
| sp O60664-4 PLIN3_HUMAN | 0.22168541 | 0.10861364 |
| sp Q5TZA2 CROCC_HUMAN   | 0.22179794 | 0.20467198 |
| sp Q15257-2 PTPA_HUMAN  | 0.22195244 | 0          |
| sp Q8WYA6-2 CTBL1_HUMAN | 0.22208595 | 0.19149946 |
| sp P62750 RL23A_HUMAN   | 0.22258568 | 0.19149946 |
| sp P05155-2 IC1_HUMAN   | 0.22349167 | 0.23541966 |

|                          |            |            |
|--------------------------|------------|------------|
| sp P51570-2 GALK1_HUMAN  | 0.22349358 | 0          |
| sp P01031 CO5_HUMAN      | 0.22389603 | 1.0297993  |
| sp O15145 ARPC3_HUMAN    | 0.22407532 | 0.09894868 |
| sp P61020 RAB5B_HUMAN    | 0.2242775  | 0.5204253  |
| sp Q13618-2 CUL3_HUMAN   | 0.22444153 | 0.5832693  |
| sp P49588-2 SYAC_HUMAN   | 0.2251358  | 1.0224596  |
| sp O60884 DNJA2_HUMAN    | 0.22546291 | 0          |
| sp O60488-2 ACSL4_HUMAN  | 0.22574425 | 0          |
| sp O43143 DHX15_HUMAN    | 0.22576904 | 0.66088426 |
| sp Q9Y3A3-3 PHOCN_HUMAN  | 0.22587967 | 0.19149946 |
| sp P39019 RS19_HUMAN     | 0.22600174 | 0.5204253  |
| sp Q5JPE7-2 NOMO2_HUMAN  | 0.22629738 | 0.656254   |
| sp Q68EM7-2 RHG17_HUMAN  | 0.22640228 | 0          |
| sp P14550 AK1A1_HUMAN    | 0.22681808 | 0.1742838  |
| sp P02751-15 FINC_HUMAN  | 0.22683525 | 0          |
| sp P25685-2 DNJB1_HUMAN  | 0.22693253 | 0.09894868 |
| sp O75915 PRAF3_HUMAN    | 0.2272911  | 0.21439649 |
| sp P10909-5 CLUS_HUMAN   | 0.22731972 | 0.24295025 |
| sp O43242 PSMD3_HUMAN    | 0.22759628 | 0.312067   |
| sp Q96P70 IPO9_HUMAN     | 0.22790813 | 0.19149946 |
| sp O43396 TXNL1_HUMAN    | 0.22840118 | 0          |
| sp P07195 LDHB_HUMAN     | 0.22863388 | 0.5077588  |
| sp Q07960 RHG01_HUMAN    | 0.22877502 | 0.2207585  |
| sp O75475 PSIP1_HUMAN    | 0.22907639 | 0.656254   |
| sp Q8TCS8 PNPT1_HUMAN    | 0.22950554 | 0          |
| sp P12277 KCRB_HUMAN     | 0.22960854 | 0.48353976 |
| sp P31513 FMO3_HUMAN     | 0.22968864 | 0          |
| sp Q53H82 LACB2_HUMAN    | 0.22979927 | 0          |
| sp Q9HC38-2 GLOD4_HUMAN  | 0.23008156 | 0          |
| sp Q9NT62-2 ATG3_HUMAN   | 0.2307167  | 0          |
| sp Q9Y224 RTRAF_HUMAN    | 0.23096466 | 1.1791906  |
| sp O60506-3 HNRPOQ_HUMAN | 0.2313137  | 0.3852666  |
| sp P19013 K2C4_HUMAN     | 0.23154831 | 0.65625405 |
| sp Q08379 GOGA2_HUMAN    | 0.23167801 | 0.45033538 |
| sp P16298-2 PP2BB_HUMAN  | 0.23256874 | 0          |
| sp Q9NP79 VTA1_HUMAN     | 0.23262978 | 0.19149946 |
| sp P62140 PP1B_HUMAN     | 0.23300934 | 0.09894868 |
| sp Q9UBB4-2 ATX10_HUMAN  | 0.23322487 | 0          |
| sp P54652 HSP72_HUMAN    | 0.23387527 | 0          |
| sp Q9Y570-2 PPME1_HUMAN  | 0.23418427 | 0.6070219  |
| sp P46779-2 RL28_HUMAN   | 0.2343235  | 0.7827403  |
| sp P48741 HSP77_HUMAN    | 0.23472786 | 0          |
| sp O00429-3 DNM1L_HUMAN  | 0.23500443 | 0.42646354 |
| sp O76011 KRT34_HUMAN    | 0.23675728 | 0          |
| sp Q06787-10 FMR1_HUMAN  | 0.23683357 | 0.43633315 |

|                           |            |            |
|---------------------------|------------|------------|
| sp Q09161 NCBP1_HUMAN     | 0.23715782 | 0          |
| sp Q02818 NUCB1_HUMAN     | 0.23736191 | 0.85449874 |
| sp Q8NHV1 GIMA7_HUMAN     | 0.23782349 | 0.7061832  |
| sp A0A0C4DH38 HV551_HUMAN | 0.23828888 | 0.19149946 |
| sp P04843 RPN1_HUMAN      | 0.2382946  | 0.7225199  |
| sp Q92629-2 SGCD_HUMAN    | 0.23854065 | 0          |
| sp P43686 PRS6B_HUMAN     | 0.23908901 | 0.11949348 |
| sp Q15435 PP1R7_HUMAN     | 0.23923588 | 0          |
| sp P62995-3 TRA2B_HUMAN   | 0.23948288 | 1.1932944  |
| sp Q9NY15 STAB1_HUMAN     | 0.23983765 | 0.19149946 |
| sp Q15075 EEA1_HUMAN      | 0.2403984  | 0.48133445 |
| sp P62304 RUXE_HUMAN      | 0.24076653 | 0          |
| sp P04792 HSPB1_HUMAN     | 0.24077797 | 0.3731982  |
| sp P43243 MATR3_HUMAN     | 0.24085045 | 0.92667    |
| sp Q15642-3 CIP4_HUMAN    | 0.24129581 | 0          |
| sp O60610-2 DIAP1_HUMAN   | 0.24146557 | 0.7957244  |
| sp P34932 HSP74_HUMAN     | 0.24190903 | 0.28765488 |
| sp P54727 RD23B_HUMAN     | 0.24205017 | 0.40256184 |
| sp P53990-2 IST1_HUMAN    | 0.24277878 | 0          |
| sp Q96A33-2 CCD47_HUMAN   | 0.24336433 | 0.7827403  |
| sp Q15274 NADC_HUMAN      | 0.24604607 | 0.21439649 |
| sp P31321 KAP1_HUMAN      | 0.24619293 | 0          |
| sp P05156 CFAI_HUMAN      | 0.24628448 | 0.57986265 |
| sp P35813-3 PPM1A_HUMAN   | 0.24656105 | 0          |
| sp P14314-2 GLU2B_HUMAN   | 0.24713326 | 0          |
| sp Q14258 TRI25_HUMAN     | 0.24726486 | 1.1932943  |
| sp P30419-2 NMT1_HUMAN    | 0.24793243 | 0.19149946 |
| sp Q9Y2B0 CNPY2_HUMAN     | 0.24871731 | 0.45033538 |
| sp P36873-2 PP1G_HUMAN    | 0.24905014 | 0          |
| sp Q9Y6E0 STK24_HUMAN     | 0.24922943 | 0          |
| sp P52943 CRIP2_HUMAN     | 0.24931717 | 0.40256184 |
| sp P04350 TBB4A_HUMAN     | 0.24949455 | 0          |
| sp O60313-10 OPA1_HUMAN   | 0.25048637 | 0          |
| sp Q86VP6 CAND1_HUMAN     | 0.2513256  | 0.5204253  |
| sp Q9NR31 SAR1A_HUMAN     | 0.2520256  | 0.7827403  |
| sp Q8WVV9-5 HNRLL_HUMAN   | 0.2520275  | 0          |
| sp Q9UH99-2 SUN2_HUMAN    | 0.25211334 | 0.84879977 |
| sp P02790 HEMO_HUMAN      | 0.2526703  | 1.0902835  |
| sp P43307 SSRA_HUMAN      | 0.25373077 | 0.7827403  |
| sp P17980 PRS6A_HUMAN     | 0.25574303 | 0.2699497  |
| sp P04844 RPN2_HUMAN      | 0.25634193 | 0.84879977 |
| sp P10644 KAPO_HUMAN      | 0.2564354  | 0.98032326 |
| sp P46821 MAP1B_HUMAN     | 0.25689125 | 0.45033538 |
| sp Q6UW02 CP20A_HUMAN     | 0.2570076  | 0.45033538 |
| sp Q9UJU6-2 DBNL_HUMAN    | 0.25735474 | 0.06291623 |

|                         |            |            |
|-------------------------|------------|------------|
| sp Q15717 ELAV1_HUMAN   | 0.25787354 | 0.43633315 |
| sp P22894 MMP8_HUMAN    | 0.2582302  | 0.45033538 |
| sp O60825-2 F262_HUMAN  | 0.26019478 | 0          |
| sp P31323 KAP3_HUMAN    | 0.26031303 | 0.7827403  |
| sp Q14194-2 DPYL1_HUMAN | 0.26057053 | 0          |
| sp Q14847 LASP1_HUMAN   | 0.2610798  | 0          |
| sp Q9BY32 ITPA_HUMAN    | 0.26141834 | 0.06291623 |
| sp P31943 HNRH1_HUMAN   | 0.2616558  | 0.29066643 |
| sp P55265-5 DSRAD_HUMAN | 0.26235008 | 0.45033538 |
| sp Q9BWD1 THIC_HUMAN    | 0.2632103  | 0          |
| sp Q709C8-2 VP13C_HUMAN | 0.26381016 | 0.35795313 |
| sp Q8TDL5 BPIB1_HUMAN   | 0.2653618  | 0.24097534 |
| sp Q9BUT1 BDH2_HUMAN    | 0.26598167 | 0.26737198 |
| sp Q92820 GGH_HUMAN     | 0.2662773  | 0.19149946 |
| sp O00170 AIP_HUMAN     | 0.26633453 | 0.35795313 |
| sp P36542 ATPG_HUMAN    | 0.26643467 | 0          |
| sp Q04828 AK1C1_HUMAN   | 0.26759148 | 0.2178309  |
| sp P36578 RL4_HUMAN     | 0.26762962 | 0.62912476 |
| sp O60271-5 JIP4_HUMAN  | 0.26769638 | 0          |
| sp O14745 NHRF1_HUMAN   | 0.26817894 | 1.0801278  |
| sp Q92896-2 GSLG1_HUMAN | 0.26848984 | 0.33495146 |
| sp Q8N8S7-2 ENAH_HUMAN  | 0.26861954 | 0          |
| sp Q7Z4H8 PLGT3_HUMAN   | 0.26868248 | 1.0485198  |
| sp P14324 FPPS_HUMAN    | 0.2703514  | 0          |
| sp Q99961-2 SH3G1_HUMAN | 0.27054787 | 0          |
| sp P29466-2 CASP1_HUMAN | 0.2710228  | 0.7061832  |
| sp Q9BS40 LXN_HUMAN     | 0.27104378 | 0          |
| sp O00560-2 SDCB1_HUMAN | 0.27181053 | 0.45033538 |
| sp P55854-2 SUMO3_HUMAN | 0.27313805 | 0          |
| sp O43252 PAPS1_HUMAN   | 0.2736473  | 0          |
| sp Q8IU7 AEBP1_HUMAN    | 0.27447128 | 0.09894868 |
| sp P09917-3 LOX5_HUMAN  | 0.27487183 | 0.5204253  |
| sp Q14195-2 DPYL3_HUMAN | 0.27539062 | 1.2859163  |
| sp Q969G5 CAVN3_HUMAN   | 0.27624702 | 1.0485198  |
| sp O15260-2 SURF4_HUMAN | 0.27662086 | 0.19149946 |
| sp Q9UQ16-2 DYN3_HUMAN  | 0.27667046 | 0          |
| sp P22102 PUR2_HUMAN    | 0.2773304  | 0.5111962  |
| sp O43488 ARK72_HUMAN   | 0.27781677 | 0          |
| sp Q6UW68 TM205_HUMAN   | 0.2779274  | 0.45033538 |
| sp P00740-2 FA9_HUMAN   | 0.27911377 | 0.7498006  |
| sp P21291 CSRP1_HUMAN   | 0.27935028 | 0.694615   |
| sp Q8WZA0-2 LZIC_HUMAN  | 0.27945423 | 0.45033538 |
| sp Q13243-3 SRSF5_HUMAN | 0.2803688  | 0.45033538 |
| sp Q8N1B4-2 VPS52_HUMAN | 0.28052902 | 0          |
| sp Q14697 GANAB_HUMAN   | 0.28157806 | 0          |

|                         |            |            |
|-------------------------|------------|------------|
| sp P54578-2 UBP14_HUMAN | 0.28347778 | 0.19149946 |
| sp P11171-2 41_HUMAN    | 0.28372002 | 0.7061832  |
| sp Q8WX93-5 PALLD_HUMAN | 0.28443336 | 0.3188726  |
| sp P48506 GSH1_HUMAN    | 0.28477287 | 0.7827403  |
| sp Q8TCJ2 STT3B_HUMAN   | 0.28507996 | 0.7827403  |
| sp P55263 ADK_HUMAN     | 0.2851658  | 0          |
| sp O00151 PDLI1_HUMAN   | 0.28569794 | 0.5176613  |
| sp Q9Y266 NUDC_HUMAN    | 0.2858143  | 0          |
| sp P35573 GDE_HUMAN     | 0.28666115 | 0.7061832  |
| sp P57737-4 CORO7_HUMAN | 0.28685188 | 0.45033538 |
| sp P35270 SPRE_HUMAN    | 0.28704834 | 0          |
| sp P62195 PRS8_HUMAN    | 0.287117   | 0.21439649 |
| sp P23083 HV102_HUMAN   | 0.28789902 | 0.656254   |
| sp P00441 SODC_HUMAN    | 0.2880268  | 0.65625405 |
| sp Q13043 STK4_HUMAN    | 0.28811264 | 0.7827403  |
| sp Q9P0J0-2 NDUAD_HUMAN | 0.29042816 | 0.19149946 |
| sp P18084 ITB5_HUMAN    | 0.29086494 | 0.7061832  |
| sp Q13505-3 MTX1_HUMAN  | 0.29124165 | 0          |
| sp Q9BU23-3 LMF2_HUMAN  | 0.29179573 | 0.45033538 |
| sp Q16204 CCDC6_HUMAN   | 0.29298973 | 0          |
| sp Q01518 CAP1_HUMAN    | 0.29440403 | 0          |
| sp Q13200 PSMD2_HUMAN   | 0.29512978 | 0.09894868 |
| sp P0C0L5 CO4B_HUMAN    | 0.29516602 | 0.656254   |
| sp Q9NR12-2 PDLI7_HUMAN | 0.29543304 | 0.633381   |
| sp P36269-2 GGT5_HUMAN  | 0.29641342 | 1.120602   |
| sp P30046 DOPD_HUMAN    | 0.2969036  | 0.45033538 |
| sp Q9NQG5 RPR1B_HUMAN   | 0.29812813 | 0.2178309  |
| sp P54725-2 RD23A_HUMAN | 0.2998581  | 0.19149946 |
| sp O15254-2 ACOX3_HUMAN | 0.3006897  | 0          |
| sp P07358 CO8B_HUMAN    | 0.30174446 | 1.2095301  |
| sp O14974-3 MYPT1_HUMAN | 0.3021469  | 0.7217418  |
| sp P28161 GSTM2_HUMAN   | 0.30265808 | 0.7827403  |
| sp O43852-5 CALU_HUMAN  | 0.30275726 | 0.09894868 |
| sp P54819-2 KAD2_HUMAN  | 0.30295944 | 0.40256184 |
| sp P62277 RS13_HUMAN    | 0.30319595 | 0.19149946 |
| sp Q3SY69 AL1L2_HUMAN   | 0.30352783 | 0.45033538 |
| sp O60879-2 DIAP2_HUMAN | 0.3037567  | 0.43633315 |
| sp P29692 EF1D_HUMAN    | 0.3046627  | 0          |
| sp P05387 RLA2_HUMAN    | 0.306036   | 0.45033538 |
| sp O60784 TOM1_HUMAN    | 0.3063259  | 0.30372584 |
| sp Q15149-9 PLEC_HUMAN  | 0.3064804  | 0.656254   |
| sp P49821-2 NDUV1_HUMAN | 0.3065834  | 0.42646354 |
| sp Q9UBE0 SAE1_HUMAN    | 0.3079586  | 0.40256184 |
| sp Q9NVA2 SEP11_HUMAN   | 0.30962753 | 0.8244277  |
| sp P55039 DRG2_HUMAN    | 0.3097725  | 0          |

|                          |            |            |
|--------------------------|------------|------------|
| sp P31946-2 1433B_HUMAN  | 0.31101227 | 0          |
| sp P04440 DPB1_HUMAN     | 0.31212616 | 0.45033538 |
| sp Q08170 SRSF4_HUMAN    | 0.31435204 | 0.656254   |
| sp P12270 TPR_HUMAN      | 0.3149414  | 0.19149946 |
| sp Q9Y5Z4-2 HEBP2_HUMAN  | 0.31522274 | 0.45033538 |
| sp Q04446 GLGB_HUMAN     | 0.3153305  | 0.14927356 |
| sp Q92688-2 AN32B_HUMAN  | 0.31555176 | 0.19149946 |
| sp P08708 RS17_HUMAN     | 0.31569672 | 0.7588735  |
| sp P50135 HNMT_HUMAN     | 0.3163185  | 0          |
| sp Q00013-2 EM55_HUMAN   | 0.31648827 | 0          |
| sp Q16630-3 CPSF6_HUMAN  | 0.3171463  | 0.7061832  |
| sp O94875-11 SRBS2_HUMAN | 0.3171959  | 0.656254   |
| sp O94911-3 ABCA8_HUMAN  | 0.31796074 | 0.45033538 |
| sp P01834 IGKC_HUMAN     | 0.32026672 | 0.7827403  |
| sp P12111-4 CO6A3_HUMAN  | 0.3215065  | 0.656254   |
| sp P62241 RS8_HUMAN      | 0.32235336 | 1.0634323  |
| sp O00534 VMA5A_HUMAN    | 0.32294464 | 0.91072154 |
| sp P49841-2 GSK3B_HUMAN  | 0.32541656 | 0          |
| sp P12931-2 SRC_HUMAN    | 0.32631874 | 0.312067   |
| sp Q13976 KGP1_HUMAN     | 0.32652473 | 0.87291557 |
| sp P02765 FETUA_HUMAN    | 0.32713127 | 1.3006523  |
| sp P48426-2 PI42A_HUMAN  | 0.32749176 | 0.7827403  |
| sp Q9NZ08-2 ERAP1_HUMAN  | 0.32867432 | 1.2064548  |
| sp Q96AQ6-2 PBIP1_HUMAN  | 0.33159828 | 0.26737198 |
| sp P15374 UCHL3_HUMAN    | 0.33196068 | 0.19149946 |
| sp Q0ZGT2-4 NEXN_HUMAN   | 0.33286476 | 0          |
| sp POCG38 POTEI_HUMAN    | 0.33434296 | 0          |
| sp P11166 GTR1_HUMAN     | 0.3353138  | 1.1932944  |
| sp Q8N163-2 CCAR2_HUMAN  | 0.33559227 | 0.30372584 |
| sp Q9NRX4 PHP14_HUMAN    | 0.33570576 | 0.35795313 |
| sp P41240 CSK_HUMAN      | 0.33655167 | 0.19149946 |
| sp P31946 1433B_HUMAN    | 0.33868027 | 0          |
| sp Q13885 TBB2A_HUMAN    | 0.34007263 | 0.656254   |
| sp Q9UJZ1-2 STML2_HUMAN  | 0.34022903 | 0.45033538 |
| sp Q15293 RCN1_HUMAN     | 0.34101677 | 0.2178309  |
| sp Q13596-2 SNX1_HUMAN   | 0.34108734 | 0.656254   |
| sp P39023 RL3_HUMAN      | 0.3431759  | 0.45033538 |
| sp O15355 PPM1G_HUMAN    | 0.34332848 | 0.35795313 |
| sp P24844 MYL9_HUMAN     | 0.34516525 | 1.1505735  |
| sp Q14152-2 EIF3A_HUMAN  | 0.34660912 | 0.87291557 |
| sp Q14651 PLSI_HUMAN     | 0.34743404 | 0.656254   |
| sp P09493-5 TPM1_HUMAN   | 0.34773254 | 0.45033538 |
| sp Q8TD06 AGR3_HUMAN     | 0.3487854  | 0          |
| sp P00736 C1R_HUMAN      | 0.35061646 | 0.45033538 |
| sp Q99538-2 LGMN_HUMAN   | 0.35564995 | 0.7827403  |

|                          |            |            |
|--------------------------|------------|------------|
| sp Q07812-2 BAX_HUMAN    | 0.35780334 | 0.40256184 |
| sp P05452 TETN_HUMAN     | 0.36541176 | 0.7061832  |
| sp Q15172-2 2A5A_HUMAN   | 0.36954308 | 0.19149946 |
| sp Q96C86 DCPS_HUMAN     | 0.36987495 | 0.7217418  |
| sp Q9BTW9-4 TBCD_HUMAN   | 0.37113953 | 0.7061832  |
| sp Q7L576 CYFP1_HUMAN    | 0.37778187 | 0          |
| sp P36542-2 ATPG_HUMAN   | 0.37857914 | 0.656254   |
| sp O60831 PRAF2_HUMAN    | 0.38008308 | 1.1505735  |
| sp A1L4H1 SRCRL_HUMAN    | 0.38066483 | 0.45033538 |
| sp Q9UHD8-3 SEPT9_HUMAN  | 0.38508606 | 0.19149946 |
| sp Q96RU3-3 FNBP1_HUMAN  | 0.38759136 | 0          |
| sp P01619 KV320_HUMAN    | 0.3877735  | 0.656254   |
| sp P42226 STAT6_HUMAN    | 0.38802147 | 0.2178309  |
| sp P06396 GELS_HUMAN     | 0.38851357 | 0.656254   |
| sp P62633-3 CNBP_HUMAN   | 0.39071083 | 1.1932944  |
| sp Q9NWV4 CZIB_HUMAN     | 0.39134598 | 0.19149946 |
| sp Q13247-3 SRSF6_HUMAN  | 0.39260006 | 1.1932944  |
| sp P54577 SYYC_HUMAN     | 0.3930416  | 0.61034113 |
| sp P13646-3 K1C13_HUMAN  | 0.39367294 | 0.7498006  |
| sp P20810-10 ICAL_HUMAN  | 0.39757156 | 0.5204253  |
| sp A0MZ66-5 SHOT1_HUMAN  | 0.39935303 | 0.45033538 |
| sp Q99733-2 NP1L4_HUMAN  | 0.39956474 | 0.91601294 |
| sp Q04637-4 IF4G1_HUMAN  | 0.3996868  | 1.2095301  |
| sp O00233-2 PSMD9_HUMAN  | 0.40013885 | 0.2178309  |
| sp P07951-3 TPM2_HUMAN   | 0.40236473 | 0.7588735  |
| sp P35612-2 ADDB_HUMAN   | 0.4024086  | 0.656254   |
| sp Q92878-2 RAD50_HUMAN  | 0.40428734 | 0.09894868 |
| sp P35637-2 FUS_HUMAN    | 0.40535355 | 0.45033538 |
| sp P01743 HV146_HUMAN    | 0.40740585 | 0.45033538 |
| sp P12814-2 ACTN1_HUMAN  | 0.40767097 | 0.19149946 |
| sp Q562R1 ACTBL_HUMAN    | 0.40929794 | 0.35795313 |
| sp O75881 CP7B1_HUMAN    | 0.4105034  | 0.19149946 |
| sp Q7LG56-6 RIR2B_HUMAN  | 0.411726   | 0.7827403  |
| sp P01591 IGJ_HUMAN      | 0.41192818 | 0.19149946 |
| sp P51692 STA5B_HUMAN    | 0.41471195 | 0.656254   |
| sp P40261 NNMT_HUMAN     | 0.41786194 | 1.1932944  |
| sp Q10713-2 MPPA_HUMAN   | 0.42167854 | 0.45033538 |
| sp P30443 1A01_HUMAN     | 0.42248535 | 1.1932944  |
| sp P84098 RL19_HUMAN     | 0.4258461  | 0.91601294 |
| sp Q06278 AOXA_HUMAN     | 0.42956638 | 0.7827403  |
| sp Q01518-2 CAP1_HUMAN   | 0.43112755 | 0          |
| sp O94979-10 SC31A_HUMAN | 0.43284416 | 0.21439649 |
| sp Q92556 ELMO1_HUMAN    | 0.4385643  | 0.7061832  |
| sp P20674 COX5A_HUMAN    | 0.44174385 | 1.1932944  |
| sp O75489 NDUS3_HUMAN    | 0.44189644 | 0.35795313 |

|                           |            |            |
|---------------------------|------------|------------|
| sp O14787-2 TNPO2_HUMAN   | 0.4427414  | 0.656254   |
| sp Q13630 FCL_HUMAN       | 0.45207787 | 1.1505735  |
| sp Q99584 S10AD_HUMAN     | 0.45292473 | 1.1932944  |
| sp P00739-2 HPTR_HUMAN    | 0.45766068 | 0.84879977 |
| sp Q05682 CALD1_HUMAN     | 0.46874237 | 1.1276597  |
| sp A0A075B6P5 KV228_HUMAN | 0.472147   | 0.656254   |
| sp Q92888-2 ARHG1_HUMAN   | 0.47855282 | 1.1505735  |
| sp Q9UNS2 CSN3_HUMAN      | 0.4799242  | 0.656254   |
| sp Q9Y4G6 TLN2_HUMAN      | 0.48121643 | 1.1932944  |
| sp Q96JJ3-3 ELMO2_HUMAN   | 0.48792267 | 0          |
| sp Q8IUD2-2 RB6I2_HUMAN   | 0.5035095  | 0.656254   |
| sp P05090 APOD_HUMAN      | 0.5132694  | 1.1505735  |
| sp Q6IBS0 TWF2_HUMAN      | 0.5144615  | 0.19149946 |
| sp Q92552-2 RT27_HUMAN    | 0.51666737 | 1.1932944  |
| sp P55058 PLTP_HUMAN      | 0.51915836 | 0.656254   |
| sp Q92599-2 SEPT8_HUMAN   | 0.5222473  | 0.6070219  |
| sp P49721 PSB2_HUMAN      | 0.52494526 | 0.656254   |
| sp P0C0L4 CO4A_HUMAN      | 0.5280838  | 0.45033538 |
| sp Q9P2B2 FPRP_HUMAN      | 0.5334892  | 0.7588735  |
| sp O95050-2 INMT_HUMAN    | 0.53518295 | 1.1932944  |
| sp O95816 BAG2_HUMAN      | 0.5363312  | 1.1932944  |
| sp Q9Y295 DRG1_HUMAN      | 0.556797   | 1.1932944  |
| sp P50238 CRIP1_HUMAN     | 0.559618   | 1.1932944  |
| sp P00748 FA12_HUMAN      | 0.5597954  | 0.45033538 |
| sp P05534 1A24_HUMAN      | 0.61688423 | 0          |
| sp P02533 K1C14_HUMAN     | 0.61904144 | 0.656254   |
| sp Q9NZT2-2 OGFR_HUMAN    | 0.62480545 | 1.1505735  |
| sp O00499-10 BIN1_HUMAN   | 0.6847954  | 1.1932944  |
| sp P55083-2 MFAP4_HUMAN   | 0.68790627 | 1.1932944  |
| sp Q14697-2 GANAB_HUMAN   | 0.71342564 | 0.656254   |
| sp Q9BV20 MTNA_HUMAN      | 0.7195835  | 0.7827403  |
| sp P35542 SAA4_HUMAN      | 0.73840714 | 1.1932944  |
| sp P79483 DRB3_HUMAN      | 0.7456951  | 0.656254   |
| sp P19012-2 K1C15_HUMAN   | 0.75746155 | 0.656254   |
| sp Q9P289 STK26_HUMAN     | 0.7981491  | 0.656254   |
| sp Q9H6R3 ACSS3_HUMAN     | 0.86244965 | 0.45033538 |
| sp P08842 STS_HUMAN       | 0.8742943  | 0.45033538 |
| sp P01871-2 IGHM_HUMAN    | 0.91207314 | 1.2941489  |
| sp Q31612 1B73_HUMAN      | 1.0859318  | 0.656254   |
| sp Q04695 K1C17_HUMAN     | 1.2461987  | 0.656254   |
| sp P02461 CO3A1_HUMAN     | 1.3876724  | 1.1932944  |
| sp O94804 STK10_HUMAN     | 2.159443   | 0.656254   |
| sp Q30134 2B18_HUMAN      | 2.4108124  | 0.656254   |
