# Supplementary material for: Peptidylarginine deiminase 2 citrullinates MZB1 and promotes the secretion of IgM and IgA
Source: PubMed Central journal article supplement (PMC10716219; doi:10.3389/fimmu.2023.1290585), 2023-11-29
Supplement: DataSheet_4.pdf [file DataSheet_4.pdf]

## Supplemental Table 4: RA-ILD2 vs controls

| Accession #             | Fold Change | p value (-log10) |
|-------------------------|-------------|------------------|
| sp Q15109-10 RAGE_HUMAN | -1.7763214  | 1.6997428        |
| sp P22748 CAH4_HUMAN    | -1.2560749  | 2.1818786        |
| sp Q8IWL2-2 SFTA1_HUMAN | -1.1781044  | 4.509013         |
| sp P62805 H4_HUMAN      | -1.0572586  | 6.3204336        |
| sp O95810 CAVN2_HUMAN   | -1.0290108  | 3.4656596        |
| sp Q9NZA1-2 CLIC5_HUMAN | -1.0119743  | 3.342776         |
| sp P00167-2 CYB5_HUMAN  | -0.9791355  | 1.4104178        |
| sp P12429 ANXA3_HUMAN   | -0.9170113  | 8.032379         |
| sp O96009 NAPSA_HUMAN   | -0.9151058  | 2.4829872        |
| sp P08174-3 DAF_HUMAN   | -0.9129753  | 1.6960104        |
| sp P09467 F16P1_HUMAN   | -0.7995834  | 4.7229815        |
| sp P33151 CADH5_HUMAN   | -0.7079163  | 1.4104178        |
| sp Q9UGT4 SUSD2_HUMAN   | -0.7060204  | 3.1266599        |
| sp Q9NZN3 EHD3_HUMAN    | -0.7051048  | 1.6960104        |
| sp P50895 BCAM_HUMAN    | -0.6978416  | 4.964395         |
| sp P41218 MNDA_HUMAN    | -0.6947212  | 2.1818786        |
| sp P26006-1 ITA3_HUMAN  | -0.6929436  | 4.2046685        |
| sp P60903 S10AA_HUMAN   | -0.6840897  | 1.6960104        |
| sp P51659 DHB4_HUMAN    | -0.6814957  | 1.9647322        |
| sp P11233 RALA_HUMAN    | -0.6700573  | 1.6960104        |
| sp P12821-2 ACE_HUMAN   | -0.6501007  | 2.4829872        |
| sp P07339 CATD_HUMAN    | -0.636694   | 7.2183566        |
| sp P49407-2 ARRB1_HUMAN | -0.6357803  | 2.4935064        |
| sp P35241 RADI_HUMAN    | -0.6244202  | 2.838374         |
| sp P56199 ITA1_HUMAN    | -0.6150456  | 5.663637         |
| sp Q6NZI2 CAVN1_HUMAN   | -0.6097794  | 5.3240805        |
| sp P50897-2 PPT1_HUMAN  | -0.6068974  | 1.6960104        |
| sp P05362 ICAM1_HUMAN   | -0.595871   | 3.6211643        |
| sp Q9NPY3 C1QR1_HUMAN   | -0.5870018  | 1.4716977        |
| sp P05164-3 PERM_HUMAN  | -0.5861893  | 8.709611         |
| sp Q9Y624 JAM1_HUMAN    | -0.5785332  | 2.3047035        |
| sp Q13510-2 ASAH1_HUMAN | -0.5773602  | 4.6488075        |
| sp P06703 S10A6_HUMAN   | -0.5683365  | 1.4104178        |
| sp P09668 CATH_HUMAN    | -0.5467377  | 2.0337436        |
| sp Q01469 FABP5_HUMAN   | -0.5442257  | 3.9658737        |
| sp P55290-4 CAD13_HUMAN | -0.5330181  | 1.4104178        |
| sp P21397 AOFA_HUMAN    | -0.5290012  | 3.6182032        |
| sp P26447 S10A4_HUMAN   | -0.5194874  | 2.3143692        |
| sp Q07157 ZO1_HUMAN     | -0.4937744  | 7.3871665        |
| sp P02788 TRFL_HUMAN    | -0.4864807  | 13.995548        |
| sp Q6PIU2-2 NCEH1_HUMAN | -0.4733734  | 1.4278674        |
| sp P09110 THIK_HUMAN    | -0.4640579  | 1.7703108        |
| sp Q92817 EVPL_HUMAN    | -0.4540634  | 2.3801057        |

|                         |            |           |
|-------------------------|------------|-----------|
| sp P05091 ALDH2_HUMAN   | -0.4523239 | 8.576053  |
| sp P22307-8 NLTP_HUMAN  | -0.4496727 | 2.9807727 |
| sp P59666 DEF3_HUMAN    | -0.4464665 | 1.3815327 |
| sp P02786 TFR1_HUMAN    | -0.4317322 | 3.292093  |
| sp P63218 GBG5_HUMAN    | -0.4301987 | 1.6604291 |
| sp Q08722-2 CD47_HUMAN  | -0.4292622 | 1.6960104 |
| sp P61626 LYSC_HUMAN    | -0.4142609 | 2.8384566 |
| sp Q8NF37 PCAT1_HUMAN   | -0.4002323 | 1.827201  |
| sp P01903 DRA_HUMAN     | -0.3992081 | 2.1892438 |
| sp P61106 RAB14_HUMAN   | -0.3828964 | 3.6211643 |
| sp P16284-3 PECA1_HUMAN | -0.3819466 | 2.9846454 |
| sp P02769 ALBU_BOVIN    | -0.3751183 | 3.7944438 |
| sp P11717 MPRI_HUMAN    | -0.3667221 | 1.4104178 |
| sp Q9UPQ0-3 LIMC1_HUMAN | -0.3599548 | 1.4050349 |
| sp P84243 H33_HUMAN     | -0.3545895 | 1.6960104 |
| sp P00325 ADH1B_HUMAN   | -0.3475304 | 3.2450993 |
| sp Q9H0U4 RAB1B_HUMAN   | -0.3448601 | 1.3815327 |
| sp P05556 ITB1_HUMAN    | -0.3443565 | 4.899806  |
| sp P31949 S10AB_HUMAN   | -0.3413658 | 2.4829872 |
| sp Q9UHG3 PCYOX_HUMAN   | -0.3219681 | 2.894491  |
| sp P04040 CATA_HUMAN    | -0.3154316 | 4.974138  |
| sp O00159 MYO1C_HUMAN   | -0.3077164 | 3.9690554 |
| sp Q7Z406-2 MYH14_HUMAN | -0.2855721 | 2.918292  |
| sp Q96TC7 RMD3_HUMAN    | -0.2838249 | 1.6997428 |
| sp Q9UDY2-3 ZO2_HUMAN   | -0.27454   | 1.7451575 |
| sp P04179-4 SODM_HUMAN  | -0.266674  | 1.8444856 |
| sp P51149 RAB7A_HUMAN   | -0.2517967 | 1.6545225 |
| sp P14543-2 NID1_HUMAN  | -0.2501488 | 1.6208863 |
| sp A6NMZ7 CO6A6_HUMAN   | -0.2481041 | 2.629145  |
| sp O60437 PEPL_HUMAN    | -0.2464066 | 1.8593699 |
| sp P10253 LYAG_HUMAN    | -0.2394714 | 2.9306097 |
| sp Q13228-4 SBP1_HUMAN  | -0.2341557 | 1.3849562 |
| sp P55268 LAMB2_HUMAN   | -0.2166557 | 2.10832   |
| sp P42167-2 LAP2B_HUMAN | -0.2158413 | 1.5054473 |
| sp P09960 LKHA4_HUMAN   | -0.2085648 | 2.2420065 |
| sp P07988 PSPB_HUMAN    | -0.2075329 | 3.0139608 |
| sp P42765 THIM_HUMAN    | -0.2022533 | 2.0527554 |
| sp Q9NZN4 EHD2_HUMAN    | -0.1955891 | 1.4936472 |
| sp Q01082 SPTB2_HUMAN   | -0.189949  | 2.279627  |
| sp P35908 K22E_HUMAN    | 0.15756989 | 4.827397  |
| sp P07305 H10_HUMAN     | 0.16381264 | 1.4104178 |
| sp P35527 K1C9_HUMAN    | 0.16681099 | 2.0528736 |
| sp P02730 B3AT_HUMAN    | 0.17526627 | 2.312627  |
| sp P01011 AACT_HUMAN    | 0.18772888 | 4.505435  |
| sp P02768 ALBU_HUMAN    | 0.19329453 | 11.515463 |

|                         |            |           |
|-------------------------|------------|-----------|
| sp Q14980-2 NUMA1_HUMAN | 0.19429779 | 1.3332586 |
| sp Q16629-4 SRSF7_HUMAN | 0.20429039 | 1.3815327 |
| sp P08238 HS90B_HUMAN   | 0.22286987 | 1.7659291 |
| sp P11021 BIP_HUMAN     | 0.2579193  | 2.8963943 |
| sp P15090 FABP4_HUMAN   | 0.25868988 | 2.5644996 |
| sp P62701 RS4X_HUMAN    | 0.26350212 | 2.1818786 |
| sp P32119 PRDX2_HUMAN   | 0.26542664 | 3.2217336 |
| sp P62424 RL7A_HUMAN    | 0.28075218 | 1.867911  |
| sp O14745 NHRF1_HUMAN   | 0.28127098 | 1.7165122 |
| sp Q12906-2 ILF3_HUMAN  | 0.28769684 | 1.3279703 |
| sp Q15084-5 PDIA6_HUMAN | 0.28888607 | 2.703525  |
| sp P23456 Trypsin       | 0.28990936 | 1.9509854 |
| sp P39656-3 OST48_HUMAN | 0.2981472  | 2.1404836 |
| sp P62913 RL11_HUMAN    | 0.3025341  | 1.6960104 |
| sp P04844 RPN2_HUMAN    | 0.3040371  | 1.560883  |
| sp P11277-3 SPTB1_HUMAN | 0.3042488  | 1.6587203 |
| sp P13645 K1C10_HUMAN   | 0.30434036 | 6.57691   |
| sp P61353 RL27_HUMAN    | 0.30615234 | 1.6960104 |
| sp Q15582 BGH3_HUMAN    | 0.30750275 | 3.340024  |
| sp P19013 K2C4_HUMAN    | 0.30840683 | 1.4278674 |
| sp Q7Z5L7-2 PODN_HUMAN  | 0.31939316 | 1.6960104 |
| sp P23396 RS3_HUMAN     | 0.31954002 | 3.7962992 |
| sp P18124 RL7_HUMAN     | 0.3200817  | 1.7703108 |
| sp O96000-2 NDUBA_HUMAN | 0.32143402 | 1.6960104 |
| sp P51888 PRELP_HUMAN   | 0.32188034 | 3.095067  |
| sp P35606-2 COPB2_HUMAN | 0.3263073  | 2.9337258 |
| sp P46781 RS9_HUMAN     | 0.33075714 | 1.8146555 |
| sp O00534 VMA5A_HUMAN   | 0.33579636 | 2.0928013 |
| sp P53621-2 COPA_HUMAN  | 0.33592987 | 1.4663166 |
| sp Q12907 LMAN2_HUMAN   | 0.33626747 | 1.3080103 |
| sp P28838-2 AMPL_HUMAN  | 0.3380108  | 4.9486732 |
| sp P55884-2 EIF3B_HUMAN | 0.34392166 | 1.4936475 |
| sp P68871 HBB_HUMAN     | 0.34472656 | 4.051346  |
| sp P07900-2 HS90A_HUMAN | 0.34499168 | 2.5153658 |
| sp Q9UBX5 FBLN5_HUMAN   | 0.34620094 | 1.9951487 |
| sp Q99798 ACON_HUMAN    | 0.34692764 | 3.2804387 |
| sp Q8IZ83-3 A16A1_HUMAN | 0.34781647 | 1.4564189 |
| sp P09874 PARP1_HUMAN   | 0.34880257 | 2.653196  |
| sp P49419-2 AL7A1_HUMAN | 0.350832   | 3.649813  |
| sp P07814 SYEP_HUMAN    | 0.3517475  | 1.9265962 |
| sp Q9Y4L1 HYOU1_HUMAN   | 0.35731316 | 2.0526927 |
| sp O95834 EMAL2_HUMAN   | 0.35865784 | 2.0727112 |
| sp P07357 CO8A_HUMAN    | 0.36079216 | 2.5461748 |
| sp P32969 RL9_HUMAN     | 0.36273193 | 1.6960104 |
| sp Q14112-2 NID2_HUMAN  | 0.36377716 | 2.987788  |

|                         |            |           |
|-------------------------|------------|-----------|
| sp P21266 GSTM3_HUMAN   | 0.36417198 | 2.1594222 |
| sp Q9UBS4 DJB11_HUMAN   | 0.36675453 | 1.4104178 |
| sp O15061-2 SYNEM_HUMAN | 0.36860085 | 2.838374  |
| sp Q06210-2 GFPT1_HUMAN | 0.36960983 | 1.5403327 |
| sp Q00341 VIGLN_HUMAN   | 0.36987495 | 2.2323174 |
| sp P02042 HBD_HUMAN     | 0.37037086 | 3.5908275 |
| sp P69905 HBA_HUMAN     | 0.3715973  | 3.4656596 |
| sp Q15124 PGM5_HUMAN    | 0.37667084 | 3.520947  |
| sp P07738 PMGE_HUMAN    | 0.37748337 | 1.9647322 |
| sp P02649 APOE_HUMAN    | 0.38094902 | 2.7847733 |
| sp Q15436 SC23A_HUMAN   | 0.38419724 | 1.3635377 |
| sp P15144 AMPN_HUMAN    | 0.38817024 | 1.6604291 |
| sp P04264 K2C1_HUMAN    | 0.39756775 | 11.985547 |
| sp P09493-8 TPM1_HUMAN  | 0.39928246 | 1.5054473 |
| sp O43175 SERA_HUMAN    | 0.40094376 | 1.3319147 |
| sp Q96IJ6-2 GMPPA_HUMAN | 0.40485    | 1.4278674 |
| sp O00567 NOP56_HUMAN   | 0.40821648 | 1.3815327 |
| sp P14550 AK1A1_HUMAN   | 0.40859604 | 1.818702  |
| sp A0AVT1 UBA6_HUMAN    | 0.41140366 | 1.3815327 |
| sp Q07507 DERM_HUMAN    | 0.41759872 | 2.3388627 |
| sp P23946 CMA1_HUMAN    | 0.41834068 | 1.5646582 |
| sp P40429 RL13A_HUMAN   | 0.41859055 | 1.4104178 |
| sp Q9P2E9 RRBP1_HUMAN   | 0.41902542 | 5.3586526 |
| sp P00966 ASSY_HUMAN    | 0.42215347 | 1.4548165 |
| sp P04843 RPN1_HUMAN    | 0.42381096 | 4.3238716 |
| sp P08670 VIME_HUMAN    | 0.42474556 | 12.28203  |
| sp P35555 FBN1_HUMAN    | 0.42723083 | 8.998554  |
| sp P05155-2 IC1_HUMAN   | 0.43045425 | 2.4829872 |
| sp Q07065 CKAP4_HUMAN   | 0.430645   | 7.5853944 |
| sp O60763-2 USO1_HUMAN  | 0.43125916 | 2.3305986 |
| sp P15880 RS2_HUMAN     | 0.4337616  | 3.1266599 |
| sp P24844 MYL9_HUMAN    | 0.44065094 | 1.4104178 |
| sp Q01995 TAGL_HUMAN    | 0.4581108  | 4.578568  |
| sp P04196 HRG_HUMAN     | 0.4598465  | 2.7624686 |
| sp Q8WX93-5 PALLD_HUMAN | 0.46160507 | 1.7026864 |
| sp O15127 SCAM2_HUMAN   | 0.46229553 | 1.6960104 |
| sp P14625 ENPL_HUMAN    | 0.46427727 | 11.565885 |
| sp Q16647 PTGIS_HUMAN   | 0.46470642 | 1.4278674 |
| sp Q9UMS6-2 SYNP2_HUMAN | 0.46769142 | 2.2385595 |
| sp Q92896-2 GSLG1_HUMAN | 0.46783257 | 1.9190748 |
| sp P67936-2 TPM4_HUMAN  | 0.46808243 | 1.9951487 |
| sp P08727 K1C19_HUMAN   | 0.46850395 | 7.105818  |
| sp Q9UHL4 DPP2_HUMAN    | 0.47174072 | 1.4278674 |
| sp P13667 PDIA4_HUMAN   | 0.48226738 | 6.634171  |
| sp Q9NR12-2 PDLI7_HUMAN | 0.48425293 | 2.044628  |

|                         |            |           |
|-------------------------|------------|-----------|
| sp Q9Y266 NUDC_HUMAN    | 0.48587418 | 1.4104178 |
| sp Q00796 DHSO_HUMAN    | 0.48885155 | 1.4104178 |
| sp P28331-3 NDUS1_HUMAN | 0.4906044  | 3.1266599 |
| sp Q8N2S1-3 LTBP4_HUMAN | 0.4912567  | 3.218121  |
| sp P04217 A1BG_HUMAN    | 0.4924717  | 4.7039127 |
| sp Q96JB5-4 CK5P3_HUMAN | 0.49322128 | 1.4716977 |
| sp P16615 AT2A2_HUMAN   | 0.50805855 | 4.2870226 |
| sp P20774 MIME_HUMAN    | 0.5086565  | 2.3559585 |
| sp Q92598-2 HS105_HUMAN | 0.50919914 | 1.6832623 |
| sp P06727 APOA4_HUMAN   | 0.51867294 | 5.6770253 |
| sp P42224-2 STAT1_HUMAN | 0.5186825  | 2.702259  |
| sp P80303-2 NUCB2_HUMAN | 0.5206585  | 2.1818786 |
| sp P02748 CO9_HUMAN     | 0.5214462  | 3.7671235 |
| sp Q7KZF4 SND1_HUMAN    | 0.52262497 | 3.0251918 |
| sp P02774-3 VTDB_HUMAN  | 0.52303886 | 7.3871665 |
| sp P49821-2 NDUV1_HUMAN | 0.5230732  | 2.3143692 |
| sp P62753 RS6_HUMAN     | 0.52308273 | 2.1818786 |
| sp P09493-9 TPM1_HUMAN  | 0.523304   | 1.6960104 |
| sp P02749 APOH_HUMAN    | 0.52918243 | 3.1266599 |
| sp P00915 CAH1_HUMAN    | 0.53087234 | 5.792018  |
| sp Q14767 LTBP2_HUMAN   | 0.53265    | 5.742677  |
| sp P10909-5 CLUS_HUMAN  | 0.5327606  | 4.509013  |
| sp P06681 CO2_HUMAN     | 0.53534317 | 2.8739974 |
| sp P36578 RL4_HUMAN     | 0.54533386 | 4.0843706 |
| sp P84098 RL19_HUMAN    | 0.54554176 | 1.4104178 |
| sp P36955 PEDF_HUMAN    | 0.5464134  | 2.987788  |
| sp P13671 CO6_HUMAN     | 0.54961777 | 2.8739974 |
| sp P20591 MX1_HUMAN     | 0.5519428  | 1.6960104 |
| sp P26373 RL13_HUMAN    | 0.5578518  | 2.6576471 |
| sp P07451 CAH3_HUMAN    | 0.5697098  | 2.8384566 |
| sp Q13162 PRDX4_HUMAN   | 0.572731   | 3.1266599 |
| sp P02766 TTHY_HUMAN    | 0.579113   | 1.3815327 |
| sp P62241 RS8_HUMAN     | 0.5850105  | 2.4829872 |
| sp P22105-1 TENX_HUMAN  | 0.5887146  | 10.149043 |
| sp Q14315-2 FLNC_HUMAN  | 0.58979416 | 14.675837 |
| sp Q14195-2 DPYL3_HUMAN | 0.6077366  | 8.413603  |
| sp Q9Y265 RUVB1_HUMAN   | 0.61265945 | 4.051346  |
| sp P00488 F13A_HUMAN    | 0.6133499  | 5.4724083 |
| sp P07585 PGS2_HUMAN    | 0.619297   | 5.2991114 |
| sp P27635 RL10_HUMAN    | 0.6229019  | 1.6960104 |
| sp Q5TZA2 CROCC_HUMAN   | 0.62591934 | 2.151766  |
| sp P10643 CO7_HUMAN     | 0.631794   | 2.556708  |
| sp P01019 ANGT_HUMAN    | 0.6346588  | 2.4829872 |
| sp P43652 AFAM_HUMAN    | 0.63516426 | 4.4091725 |
| sp P25311 ZA2G_HUMAN    | 0.6381264  | 4.051346  |

|                         |            |           |
|-------------------------|------------|-----------|
| sp Q96PD5-2 PGRP2_HUMAN | 0.6445122  | 1.6960104 |
| sp Q9Y230 RUVB2_HUMAN   | 0.6496773  | 4.5635147 |
| sp Q9NR45 SIAS_HUMAN    | 0.65431786 | 4.051346  |
| sp P05156 CFAI_HUMAN    | 0.66049004 | 3.5908275 |
| sp P15559-3 NQO1_HUMAN  | 0.67393875 | 1.6960104 |
| sp P29622 KAIN_HUMAN    | 0.6818886  | 2.1818786 |
| sp P39059 COFA1_HUMAN   | 0.6894436  | 2.1818786 |
| sp P49257 LMAN1_HUMAN   | 0.7063675  | 2.1818786 |
| sp P51884 LUM_HUMAN     | 0.7253151  | 8.112776  |
| sp Q13938-4 CAYP1_HUMAN | 0.7299347  | 4.964395  |
| sp P01008 ANT3_HUMAN    | 0.7316532  | 5.604593  |
| sp P19823 ITIH2_HUMAN   | 0.7410965  | 5.869831  |
| sp Q9P2B2 FPRP_HUMAN    | 0.770277   | 1.4716977 |
| sp P01031 CO5_HUMAN     | 0.777935   | 4.991322  |
| sp P02675 FIBB_HUMAN    | 0.79257965 | 8.504989  |
| sp P04114 APOB_HUMAN    | 0.8047943  | 11.732811 |
| sp P01042-2 KNG1_HUMAN  | 0.8206043  | 5.776476  |
| sp P02790 HEMO_HUMAN    | 0.83267975 | 9.004438  |
| sp P02679-2 FIBG_HUMAN  | 0.85416794 | 5.5742316 |
| sp P27169 PON1_HUMAN    | 0.86538506 | 1.6960104 |
| sp P02671-2 FIBA_HUMAN  | 0.871006   | 9.406504  |
| sp P00450 CERU_HUMAN    | 0.87106323 | 11.15183  |
| sp Q14624-2 ITIH4_HUMAN | 0.88396835 | 7.2183566 |
| sp P00734 THRB_HUMAN    | 0.88994217 | 5.259211  |
| sp Q9BW30 TPPP3_HUMAN   | 0.90703964 | 3.1266599 |
| sp Q15063-3 POSTN_HUMAN | 0.92873    | 8.762705  |
| sp P00747 PLMN_HUMAN    | 0.938818   | 5.6000037 |
| sp Q05707-2 COEA1_HUMAN | 0.9609566  | 14.632371 |
| sp P19827 ITIH1_HUMAN   | 0.99650574 | 2.5644996 |
| sp P00751 CFAB_HUMAN    | 1.0556736  | 12.326815 |
| sp P05546 HEP2_HUMAN    | 1.071825   | 3.1266599 |
| sp P02652 APOA2_HUMAN   | 1.078186   | 1.9413493 |
| sp P00738-2 HPT_HUMAN   | 1.1364479  | 5.417897  |
| sp P01871-2 IGHM_HUMAN  | 1.1812077  | 1.4716977 |
| sp P08123 CO1A2_HUMAN   | 1.1951942  | 2.6576471 |
| sp P13647 K2C5_HUMAN    | 1.2192612  | 4.964395  |
| sp P02647 APOA1_HUMAN   | 1.2369003  | 13.381719 |
| sp P17661 DESM_HUMAN    | 1.2759018  | 14.778499 |
| sp P01876 IGHA1_HUMAN   | 1.3102608  | 4.051346  |
| sp P02452 CO1A1_HUMAN   | 1.3388386  | 2.058973  |
| sp Q8TDL5 BPIB1_HUMAN   | 1.3455372  | 2.2419565 |
| sp P0DOY2 IGLC2_HUMAN   | 1.3830357  | 2.1818786 |
| sp P04003 C4BPA_HUMAN   | 1.3915482  | 4.964395  |
| sp P01859 IGHG2_HUMAN   | 1.4165516  | 4.051346  |
| sp P01860 IGHG3_HUMAN   | 1.5109997  | 2.6576471 |

|                         |            |            |
|-------------------------|------------|------------|
| sp P00739-2 HPTR_HUMAN  | 1.5397644  | 2.6576471  |
| sp Q9BXN1 ASPN_HUMAN    | 1.5830898  | 1.7590232  |
| sp P0DOX5 IGG1_HUMAN    | 1.6106529  | 4.509013   |
| sp Q8WU39 MZB1_HUMAN    | 1.66259    | 1.6960104  |
| sp P0DOX8 IGL1_HUMAN    | 1.7183723  | 2.6576471  |
| sp P15088 CBPA3_HUMAN   | 1.8788643  | 2.6576471  |
| sp Q04826 1B40_HUMAN    | -2.7332363 | 0.656254   |
| sp Q01518-2 CAP1_HUMAN  | -2.4013128 | 0.656254   |
| sp P30453 1A34_HUMAN    | -1.5764227 | 0.656254   |
| sp P04229 2B11_HUMAN    | -1.361269  | 0.7827403  |
| sp Q9BXM0 PRAX_HUMAN    | -1.3528557 | 0.7827403  |
| sp P10316 1A69_HUMAN    | -1.1327953 | 0.656254   |
| sp P13760 2B14_HUMAN    | -1.0903473 | 0.91601294 |
| sp P37235 HPCL1_HUMAN   | -1.0884094 | 0.656254   |
| sp Q16777 H2A2C_HUMAN   | -1.0067043 | 0.656254   |
| sp P15428-5 PGDH_HUMAN  | -1.0043144 | 0.91601294 |
| sp P49913 CAMP_HUMAN    | -0.8804131 | 1.1932944  |
| sp O00757 F16P2_HUMAN   | -0.8454495 | 0.7827403  |
| sp P04908 H2A1B_HUMAN   | -0.8253841 | 0.656254   |
| sp P08246 ELNE_HUMAN    | -0.7930603 | 1.1932944  |
| sp Q96AP7 ESAM_HUMAN    | -0.7297859 | 0.7827403  |
| sp P13284 GILT_HUMAN    | -0.7143536 | 1.1932944  |
| sp Q07075 AMPE_HUMAN    | -0.6946716 | 1.1505735  |
| sp Q03135-2 CAV1_HUMAN  | -0.6821823 | 0.656254   |
| sp Q14956-2 GPNMB_HUMAN | -0.6606026 | 1.1932944  |
| sp Q31612 1B73_HUMAN    | -0.6392098 | 0          |
| sp Q9ULC5-3 ACSL5_HUMAN | -0.5783138 | 0.656254   |
| sp P13686 PPA5_HUMAN    | -0.5460091 | 0.91601294 |
| sp P09601 HMOX1_HUMAN   | -0.5420981 | 0.7061832  |
| sp P24158 PRTN3_HUMAN   | -0.5192642 | 1.1505735  |
| sp Q10589-2 BST2_HUMAN  | -0.5155411 | 1.1932944  |
| sp Q03135 CAV1_HUMAN    | -0.4722023 | 0.7588735  |
| sp P06753 TPM3_HUMAN    | -0.470295  | 0.656254   |
| sp Q9NVJ2 ARL8B_HUMAN   | -0.4462185 | 0.45033538 |
| sp O43615 TIM44_HUMAN   | -0.4450645 | 0.7827403  |
| sp Q9H2U2-2 IPYR2_HUMAN | -0.4391174 | 1.1932944  |
| sp P02462 CO4A1_HUMAN   | -0.4389906 | 1.1791906  |
| sp P51608 MECP2_HUMAN   | -0.4376831 | 1.1932944  |
| sp Q8WWI1-5 LMO7_HUMAN  | -0.4296417 | 0.7957244  |
| sp P13498 CY24A_HUMAN   | -0.4170971 | 0.7827403  |
| sp P62714 PP2AB_HUMAN   | -0.4122963 | 0.656254   |
| sp P06396-2 GELS_HUMAN  | -0.3984642 | 0          |
| sp O95837 GNA14_HUMAN   | -0.3984032 | 0.656254   |
| sp P02792 FRIL_HUMAN    | -0.3898068 | 0.87291557 |
| sp P61026 RAB10_HUMAN   | -0.3845444 | 0.656254   |

|                         |            |            |
|-------------------------|------------|------------|
| sp Q13231-2 CHIT1_HUMAN | -0.3775559 | 0.6070219  |
| sp P04440 DPB1_HUMAN    | -0.3734894 | 0.7827403  |
| sp Q99715-4 COCA1_HUMAN | -0.3639832 | 0.69308156 |
| sp P06702 S10A9_HUMAN   | -0.3631573 | 0.5896263  |
| sp P25774 CATS_HUMAN    | -0.3610477 | 0.7827403  |
| sp O43760-2 SNG2_HUMAN  | -0.3581982 | 0.45033538 |
| sp Q15599-2 NHRF2_HUMAN | -0.357296  | 0.8983557  |
| sp Q9UPN3 MACF1_HUMAN   | -0.3403549 | 0.35795313 |
| sp P06899 H2B1J_HUMAN   | -0.3392944 | 1.1932944  |
| sp P05109 S10A8_HUMAN   | -0.3323383 | 0.09339783 |
| sp Q53FA7 QORX_HUMAN    | -0.3318386 | 0.19149946 |
| sp P38159 RBMX_HUMAN    | -0.3316174 | 1.1932944  |
| sp O95716 RAB3D_HUMAN   | -0.3268147 | 0.656254   |
| sp Q96HD1-2 CREL1_HUMAN | -0.3237953 | 1.1932944  |
| sp P62070-4 RRAS2_HUMAN | -0.3237038 | 0          |
| sp P11279 LAMP1_HUMAN   | -0.3221149 | 1.1932944  |
| sp Q9Y3D6 FIS1_HUMAN    | -0.3191748 | 0.91601294 |
| sp P20702 ITAX_HUMAN    | -0.3174076 | 0.6070219  |
| sp O15296 LX15B_HUMAN   | -0.3167534 | 0          |
| sp P51153 RAB13_HUMAN   | -0.3104134 | 0          |
| sp Q86Y82 STX12_HUMAN   | -0.2986774 | 1.1791906  |
| sp Q9Y2Q5 LTOR2_HUMAN   | -0.2978172 | 0.7827403  |
| sp P01920 DQB1_HUMAN    | -0.2950306 | 0          |
| sp P11686-2 PSPC_HUMAN  | -0.2927246 | 0.09894868 |
| sp Q9NTX5-3 ECHD1_HUMAN | -0.2858315 | 0.8059303  |
| sp P33121-3 ACSL1_HUMAN | -0.282135  | 0.6509351  |
| sp P04080 CYTB_HUMAN    | -0.2811546 | 0          |
| sp Q9NX46 ARHL2_HUMAN   | -0.2797604 | 0.45033538 |
| sp Q6YN16 HSDL2_HUMAN   | -0.2741604 | 1.1344727  |
| sp P20340-2 RAB6A_HUMAN | -0.2734051 | 0.656254   |
| sp P05107 ITB2_HUMAN    | -0.2725143 | 0.96367663 |
| sp P05534 1A24_HUMAN    | -0.2672291 | 0          |
| sp P20292 AL5AP_HUMAN   | -0.2663889 | 0.7827403  |
| sp P62314 SMD1_HUMAN    | -0.266099  | 0.19149946 |
| sp P61019 RAB2A_HUMAN   | -0.2644978 | 0.5204253  |
| sp Q9NNW7 TRXR2_HUMAN   | -0.2635613 | 0.5111962  |
| sp Q05682-4 CALD1_HUMAN | -0.2618351 | 0          |
| sp Q9P289 STK26_HUMAN   | -0.2614012 | 0.656254   |
| sp Q15907 RB11B_HUMAN   | -0.261322  | 0.9968222  |
| sp Q9P2M7 CING_HUMAN    | -0.2542343 | 0.7588735  |
| sp P26038 MOES_HUMAN    | -0.2539578 | 0.1446394  |
| sp P67809 YBOX1_HUMAN   | -0.2513628 | 0.45033538 |
| sp P0DP25 CALM3_HUMAN   | -0.249157  | 0.44572112 |
| sp Q15286-2 RAB35_HUMAN | -0.2487011 | 0          |
| sp Q13813-2 SPTN1_HUMAN | -0.2475433 | 0.2178309  |



|                         |            |            |
|-------------------------|------------|------------|
| sp P09429 HMGB1_HUMAN   | -0.2467041 | 0.7827403  |
| sp Q13636 RAB31_HUMAN   | -0.2456513 | 0.5204253  |
| sp Q8N9N7 LRC57_HUMAN   | -0.2454662 | 0          |
| sp P17213 BPI_HUMAN     | -0.2443886 | 0          |
| sp P18428 LBP_HUMAN     | -0.241457  | 0.40256184 |
| sp A0MZ66-5 SHOT1_HUMAN | -0.2408466 | 0.19149946 |
| sp P28676 GRAN_HUMAN    | -0.2372646 | 0.35193655 |
| sp O75695 XRP2_HUMAN    | -0.2362232 | 0.09894868 |
| sp Q04837 SSBP_HUMAN    | -0.2353325 | 0.91601294 |
| sp P49327 FAS_HUMAN     | -0.2350369 | 0.50552267 |
| sp P13746 1A11_HUMAN    | -0.2346973 | 0.7827403  |
| sp O75348 VATG1_HUMAN   | -0.2327538 | 0          |
| sp Q02318 CP27A_HUMAN   | -0.2324886 | 0.7827403  |
| sp P23381 SYWC_HUMAN    | -0.2323132 | 0.97180504 |
| sp O15247 CLIC2_HUMAN   | -0.2321835 | 0.51870745 |
| sp Q9UBQ0-2 VPS29_HUMAN | -0.2283859 | 0.19149946 |
| sp A5A3E0 POTEF_HUMAN   | -0.2278156 | 0          |
| sp Q99536 VAT1_HUMAN    | -0.2268047 | 0.12054814 |
| sp O60234 GMFG_HUMAN    | -0.2244225 | 0.33495146 |
| sp P00403 COX2_HUMAN    | -0.2230263 | 0.19149946 |
| sp Q04760-2 LGUL_HUMAN  | -0.2190781 | 0.21439649 |
| sp P36543-2 VATE1_HUMAN | -0.218977  | 0.35795313 |
| sp P13804-2 ETFA_HUMAN  | -0.2185745 | 0.14672586 |
| sp P55196-5 AFAD_HUMAN  | -0.2164002 | 0.25789237 |
| sp Q13813-3 SPTN1_HUMAN | -0.2160187 | 0          |
| sp P26440 IVD_HUMAN     | -0.2155075 | 0          |
| sp P01116-2 RASK_HUMAN  | -0.2148056 | 0          |
| sp Q01518 CAP1_HUMAN    | -0.2132626 | 0          |
| sp P11047 LAMC1_HUMAN   | -0.2131538 | 0.51660806 |
| sp Q02750 MP2K1_HUMAN   | -0.2099381 | 0          |
| sp Q92522 H1X_HUMAN     | -0.20965   | 0.19149946 |
| sp P13987-2 CD59_HUMAN  | -0.209425  | 0.45033538 |
| sp P62937 PIIA_HUMAN    | -0.2088661 | 0.2178309  |
| sp Q9UBR2 CATZ_HUMAN    | -0.2085934 | 0          |
| sp P13797 PLST_HUMAN    | -0.208046  | 0.28186345 |
| sp Q15833-2 STXB2_HUMAN | -0.2073774 | 0.35795313 |
| sp P43304 GPDM_HUMAN    | -0.2010727 | 0.54687065 |
| sp P38606-2 VATA_HUMAN  | -0.2005234 | 0.10280301 |
| sp P09758 TACD2_HUMAN   | -0.1997929 | 0.3005443  |
| sp Q14254 FLOT2_HUMAN   | -0.198698  | 0.95533764 |
| sp Q13751 LAMB3_HUMAN   | -0.1986713 | 0.1342476  |
| sp P16219 ACADS_HUMAN   | -0.1986637 | 0.06291623 |
| sp P59998 ARPC4_HUMAN   | -0.1982117 | 0.52598757 |
| sp P20160 CAP7_HUMAN    | -0.1969872 | 0.7061832  |
| sp P61421 VA0D1_HUMAN   | -0.1955948 | 0.10861364 |

|                         |            |            |
|-------------------------|------------|------------|
| sp Q15121 PEA15_HUMAN   | -0.1946068 | 0.5204253  |
| sp P0CG47 UBB_HUMAN     | -0.1939488 | 0.84879977 |
| sp Q99598 TSNAX_HUMAN   | -0.1928024 | 0.5204253  |
| sp Q6P4A8 PLBL1_HUMAN   | -0.1926003 | 0.35795313 |
| sp P05141 ADT2_HUMAN    | -0.1914158 | 0.4075265  |
| sp O15230 LAMA5_HUMAN   | -0.1896324 | 0.5717351  |
| sp Q8IV08 PLD3_HUMAN    | -0.1895046 | 0.33495146 |
| sp P51648-2 AL3A2_HUMAN | -0.1880283 | 0.70235044 |
| sp Q9UM07 PADI4_HUMAN   | -0.1870537 | 0.5204253  |
| sp P13761 2B17_HUMAN    | -0.1866264 | 0          |
| sp Q15126 PMVK_HUMAN    | -0.1846809 | 0.45033538 |
| sp O00499-10 BIN1_HUMAN | -0.184474  | 0.19149946 |
| sp O95833 CLIC3_HUMAN   | -0.1815834 | 0.14672586 |
| sp O43491 E41L2_HUMAN   | -0.1803494 | 0.35262254 |
| sp Q96MM6 HS12B_HUMAN   | -0.1798859 | 0.9780152  |
| sp P61586 RHOA_HUMAN    | -0.1798172 | 0          |
| sp Q16853 AOC3_HUMAN    | -0.1791344 | 0.65625405 |
| sp P36542-2 ATPG_HUMAN  | -0.1789951 | 0          |
| sp P08572 CO4A2_HUMAN   | -0.1770325 | 0.7498006  |
| sp P30740 ILEU_HUMAN    | -0.1758518 | 0.051214   |
| sp P08729 K2C7_HUMAN    | -0.1758156 | 0.26971197 |
| sp Q96AC1 FERM2_HUMAN   | -0.1756392 | 0.63267636 |
| sp Q9UL25 RAB21_HUMAN   | -0.1679916 | 0.21439649 |
| sp P80188 NGAL_HUMAN    | -0.1668739 | 0.39873424 |
| sp P40121 CAPG_HUMAN    | -0.1665344 | 0          |
| sp Q9NPJ3-2 ACO13_HUMAN | -0.1662064 | 0.45033538 |
| sp P06865 HEXA_HUMAN    | -0.1651917 | 0.7588735  |
| sp Q8N335 GPD1L_HUMAN   | -0.1651459 | 0.30372584 |
| sp P51452-2 DUS3_HUMAN  | -0.1648312 | 0          |
| sp P49593 PPM1F_HUMAN   | -0.1646004 | 0.06291623 |
| sp Q9NV96-3 CC50A_HUMAN | -0.1641808 | 0          |
| sp P30048-2 PRDX3_HUMAN | -0.1641712 | 0.09339783 |
| sp P62820 RAB1A_HUMAN   | -0.1632423 | 0.09339783 |
| sp Q13308-6 PTK7_HUMAN  | -0.1622677 | 0.34137914 |
| sp P04839 CY24B_HUMAN   | -0.1620445 | 0          |
| sp Q16698-2 DECR_HUMAN  | -0.1618881 | 0.4918224  |
| sp P61006 RAB8A_HUMAN   | -0.1614361 | 0          |
| sp P13796 PLSL_HUMAN    | -0.1610031 | 0.66367525 |
| sp O75955-2 FLOT1_HUMAN | -0.1604767 | 0.46530083 |
| sp Q6WCQ1-2 MPRIP_HUMAN | -0.1604233 | 0.6563392  |
| sp O60814 H2B1K_HUMAN   | -0.1600323 | 1.1932944  |
| sp P07355 ANXA2_HUMAN   | -0.1594715 | 0.10328458 |
| sp P07686 HEXB_HUMAN    | -0.1592484 | 0.9968222  |
| sp P05026-2 AT1B1_HUMAN | -0.1579571 | 0.20467198 |
| sp O94760 DDAH1_HUMAN   | -0.1567936 | 0          |

|                         |            |            |
|-------------------------|------------|------------|
| sp Q32MZ4-3 LRRF1_HUMAN | -0.1566162 | 0          |
| sp Q15181 IPYR_HUMAN    | -0.155365  | 0          |
| sp P50148 GNAQ_HUMAN    | -0.1553612 | 0.21439649 |
| sp P68036-3 UB2L3_HUMAN | -0.1542759 | 0          |
| sp Q9Y376 CAB39_HUMAN   | -0.154171  | 0.1558116  |
| sp Q7LG56-6 RIR2B_HUMAN | -0.1503515 | 0          |
| sp O00423-3 EMAL1_HUMAN | -0.1501179 | 0.5204253  |
| sp P07910-2 HNRPC_HUMAN | -0.1489639 | 0.7498006  |
| sp P60953 CDC42_HUMAN   | -0.1486454 | 0.06842031 |
| sp Q09666 AHNK_HUMAN    | -0.1477814 | 0.45600381 |
| sp Q8NBQ5 DHB11_HUMAN   | -0.1472149 | 0.7217418  |
| sp P61224 RAP1B_HUMAN   | -0.1463175 | 0          |
| sp P35221 CTNA1_HUMAN   | -0.1460552 | 0.5992246  |
| sp P23528 COF1_HUMAN    | -0.1460075 | 0.1804695  |
| sp Q13188 STK3_HUMAN    | -0.1452313 | 0          |
| sp P28074 PSB5_HUMAN    | -0.1450176 | 0          |
| sp P16278-2 BGAL_HUMAN  | -0.1444321 | 0.35795313 |
| sp Q99729-2 ROAA_HUMAN  | -0.1431179 | 0          |
| sp Q92973-2 TNPO1_HUMAN | -0.1421681 | 0.43633315 |
| sp Q07866-10 KLC1_HUMAN | -0.1418419 | 0          |
| sp P25815 S100P_HUMAN   | -0.1413727 | 0          |
| sp P36551 HEM6_HUMAN    | -0.1411781 | 0          |
| sp Q15404 RSU1_HUMAN    | -0.1409779 | 0.22362706 |
| sp P27105 STOM_HUMAN    | -0.1405811 | 0.7284051  |
| sp Q00839 HNRPU_HUMAN   | -0.1404381 | 0.45033535 |
| sp Q6DKJ4 NXN_HUMAN     | -0.1403933 | 0          |
| sp P49756 RBM25_HUMAN   | -0.1394854 | 0.19149946 |
| sp P84103-2 SRSF3_HUMAN | -0.1394787 | 0.65625405 |
| sp Q6IBS0 TWF2_HUMAN    | -0.1390801 | 0          |
| sp Q6P587-3 FAHD1_HUMAN | -0.1388702 | 0.2178309  |
| sp Q00577 PURA_HUMAN    | -0.1387482 | 0.21439649 |
| sp O75155 CAND2_HUMAN   | -0.1383896 | 0          |
| sp Q9H8L6 MMRN2_HUMAN   | -0.1381283 | 0.312067   |
| sp Q9P0K7-2 RAI14_HUMAN | -0.137394  | 0          |
| sp P14780 MMP9_HUMAN    | -0.1359158 | 0.26737198 |
| sp P60033 CD81_HUMAN    | -0.1351204 | 0          |
| sp P10412 H14_HUMAN     | -0.1341629 | 0.45720983 |
| sp P24752 THIL_HUMAN    | -0.1335087 | 0.12246842 |
| sp Q15366-2 PCBP2_HUMAN | -0.133461  | 0.09894868 |
| sp Q9H4M9 EHD1_HUMAN    | -0.1327725 | 0          |
| sp Q9BWD1 THIC_HUMAN    | -0.1321735 | 0          |
| sp O15400-2 STX7_HUMAN  | -0.1295662 | 0.25789237 |
| sp Q9BXP5-5 SRRT_HUMAN  | -0.1293926 | 0.35193655 |
| sp P51148-2 RAB5C_HUMAN | -0.1282959 | 0          |
| sp P15170-2 ERF3A_HUMAN | -0.1280727 | 0          |

|                           |            |            |
|---------------------------|------------|------------|
| sp Q15417 CNN3_HUMAN      | -0.1280289 | 0          |
| sp P07942 LAMB1_HUMAN     | -0.1263256 | 0.10280301 |
| sp Q6P179 ERAP2_HUMAN     | -0.1256104 | 0.25789237 |
| sp P78347-2 GTF2I_HUMAN   | -0.1256104 | 0.19149946 |
| sp Q92882 OSTF1_HUMAN     | -0.1247072 | 0.06291623 |
| sp P16435 NCPR_HUMAN      | -0.1244965 | 0.12893641 |
| sp O43795-2 MYO1B_HUMAN   | -0.1244068 | 0.17511293 |
| sp Q16822 PCKGM_HUMAN     | -0.1243687 | 0          |
| sp P52943 CRIP2_HUMAN     | -0.1239185 | 0.1342476  |
| sp P12235 ADT1_HUMAN      | -0.1236782 | 0          |
| sp Q14533 KRT81_HUMAN     | -0.1233578 | 0          |
| sp Q13555-7 KCC2G_HUMAN   | -0.1224794 | 0          |
| sp Q9HDC9 APMAP_HUMAN     | -0.1219988 | 0.08307569 |
| sp P63220 RS21_HUMAN      | -0.1215763 | 0          |
| sp Q5T013-4 HYI_HUMAN     | -0.1214714 | 0          |
| sp Q9UBW8 CSN7A_HUMAN     | -0.1214581 | 0.09894868 |
| sp P20339-2 RAB5A_HUMAN   | -0.1209717 | 0.1558116  |
| sp P26599-2 PTBP1_HUMAN   | -0.1208515 | 0.26737198 |
| sp Q9Y5X3 SNX5_HUMAN      | -0.1201363 | 0.1500082  |
| sp P06753-2 TPM3_HUMAN    | -0.1197014 | 0.13745423 |
| sp O14786 NRP1_HUMAN      | -0.1195717 | 0.09894868 |
| sp Q15056-2 IF4H_HUMAN    | -0.1193123 | 0.19149946 |
| sp Q9NR31 SAR1A_HUMAN     | -0.1192932 | 0.19149946 |
| sp Q02083-2 NAAA_HUMAN    | -0.1172504 | 0          |
| sp O15144 ARPC2_HUMAN     | -0.1170979 | 0.24295025 |
| sp Q13232 NDK3_HUMAN      | -0.1167564 | 0          |
| sp Q99436 PSB7_HUMAN      | -0.115757  | 0          |
| sp P60983 GMFB_HUMAN      | -0.1150188 | 0          |
| sp P55010 IF5_HUMAN       | -0.1144867 | 0          |
| sp P11215-2 ITAM_HUMAN    | -0.1135349 | 0.37060758 |
| sp P17931 LEG3_HUMAN      | -0.1134224 | 0          |
| sp P62834 RAP1A_HUMAN     | -0.1102219 | 0          |
| sp Q9Y281 COF2_HUMAN      | -0.1090565 | 0          |
| sp P78417 GSTO1_HUMAN     | -0.1088715 | 0.15332921 |
| sp P52566 GDIR2_HUMAN     | -0.1078758 | 0.18414244 |
| sp P61604 CH10_HUMAN      | -0.1078606 | 0          |
| sp O15511 ARPC5_HUMAN     | -0.1068878 | 0          |
| sp Q9Y6N5 SQOR_HUMAN      | -0.1067276 | 0.2810592  |
| sp P37837 TALDO_HUMAN     | -0.1060047 | 0.11202396 |
| sp Q9UHB6-4 LIMA1_HUMAN   | -0.1052265 | 0          |
| sp Q9BTZ2 DHRS4_HUMAN     | -0.1048012 | 0.09894868 |
| sp A0A0B4J2D5 GAL3B_HUMAN | -0.1037006 | 0          |
| sp P23634-2 AT2B4_HUMAN   | -0.1036205 | 0.03367973 |
| sp Q6NUK1-2 SCMC1_HUMAN   | -0.1034603 | 0.04454162 |
| sp P61088 UBE2N_HUMAN     | -0.1034565 | 0          |

|                         |            |            |
|-------------------------|------------|------------|
| sp O00468-7 AGRIN_HUMAN | -0.1026421 | 0          |
| sp Q53GQ0 DHB12_HUMAN   | -0.1023579 | 0.20467198 |
| sp P12694-2 ODBA_HUMAN  | -0.1016598 | 0          |
| sp P51636-2 CAV2_HUMAN  | -0.1014309 | 0.19149946 |
| sp P62318-2 SMD3_HUMAN  | -0.1003876 | 0.19149946 |
| sp P40926 MDHM_HUMAN    | -0.0999737 | 0.3556601  |
| sp Q3KQV9 UAP1L_HUMAN   | -0.0996733 | 0.45033538 |
| sp P61601 NCALD_HUMAN   | -0.0993519 | 0          |
| sp Q99459 CDC5L_HUMAN   | -0.098444  | 0          |
| sp O15498-2 YKT6_HUMAN  | -0.0978489 | 0          |
| sp Q13011 ECH1_HUMAN    | -0.0975323 | 0.33495146 |
| sp Q02218-2 ODO1_HUMAN  | -0.0966034 | 0.01343579 |
| sp P50225 ST1A1_HUMAN   | -0.0959721 | 0          |
| sp Q6NY19-2 KANK3_HUMAN | -0.0958328 | 0.43633315 |
| sp P30040 ERP29_HUMAN   | -0.0956612 | 0.31759265 |
| sp Q14118 DAG1_HUMAN    | -0.0937271 | 0          |
| sp P61769 B2MG_HUMAN    | -0.0934792 | 0          |
| sp Q15942 ZYX_HUMAN     | -0.0933533 | 0.07727676 |
| sp P61020 RAB5B_HUMAN   | -0.093235  | 0          |
| sp Q14344 GNA13_HUMAN   | -0.0927734 | 0          |
| sp P10599-2 THIO_HUMAN  | -0.0927486 | 0          |
| sp P50213 IDH3A_HUMAN   | -0.0919552 | 0          |
| sp P62993 GRB2_HUMAN    | -0.09058   | 0          |
| sp Q9UFN0 NPS3A_HUMAN   | -0.0905609 | 0.43633315 |
| sp P11413-3 G6PD_HUMAN  | -0.0902538 | 0          |
| sp P08311 CATG_HUMAN    | -0.0900612 | 0.44572112 |
| sp P60981-2 DEST_HUMAN  | -0.0893822 | 0          |
| sp Q16658 FSCN1_HUMAN   | -0.0887184 | 0.22784016 |
| sp Q13492-2 PICAL_HUMAN | -0.0885696 | 0          |
| sp Q96TA1-2 NIBL1_HUMAN | -0.0882149 | 0          |
| sp P10301 RRAS_HUMAN    | -0.0869656 | 0.35795313 |
| sp P07948-2 LYN_HUMAN   | -0.0867424 | 0          |
| sp O75390 CISY_HUMAN    | -0.0861015 | 0.11094732 |
| sp P02750 A2GL_HUMAN    | -0.0860615 | 0          |
| sp O43707 ACTN4_HUMAN   | -0.0860424 | 0.04597474 |
| sp O75915 PRAF3_HUMAN   | -0.0859671 | 0.21439649 |
| sp P07858 CATB_HUMAN    | -0.0843411 | 0.356152   |
| sp P12236 ADT3_HUMAN    | -0.0843067 | 0          |
| sp P53634 CATC_HUMAN    | -0.0834293 | 0.1342476  |
| sp P37802 TAGL2_HUMAN   | -0.0833855 | 0.01044662 |
| sp P28066 PSA5_HUMAN    | -0.0830326 | 0          |
| sp P28070 PSB4_HUMAN    | -0.0822239 | 0.33495146 |
| sp Q9ULV4-3 COR1C_HUMAN | -0.0820999 | 0          |
| sp Q9H845 ACAD9_HUMAN   | -0.0813675 | 0          |
| sp P21796 VDAC1_HUMAN   | -0.0810242 | 0          |

|                         |            |            |
|-------------------------|------------|------------|
| sp Q15369-2 ELOC_HUMAN  | -0.080286  | 0          |
| sp Q8N1B4-2 VPS52_HUMAN | -0.0798836 | 0.19149946 |
| sp P09211 GSTP1_HUMAN   | -0.0787926 | 0          |
| sp Q16630-3 CPSF6_HUMAN | -0.0786152 | 0.09894868 |
| sp P84077 ARF1_HUMAN    | -0.0760727 | 0.06291623 |
| sp O95340-2 PAPS2_HUMAN | -0.0758724 | 0.14927356 |
| sp P22695 QCR2_HUMAN    | -0.0757904 | 0          |
| sp P28482 MK01_HUMAN    | -0.075119  | 0          |
| sp P00568 KAD1_HUMAN    | -0.0748978 | 0          |
| sp O60504-2 VINEX_HUMAN | -0.0747032 | 0.09894868 |
| sp P30046 DOPD_HUMAN    | -0.0733147 | 0          |
| sp Q16363-2 LAMA4_HUMAN | -0.0730095 | 0.04904167 |
| sp P36957 ODO2_HUMAN    | -0.0727768 | 0          |
| sp Q13740-2 CD166_HUMAN | -0.0727024 | 0.11075022 |
| sp Q6YHK3-4 CD109_HUMAN | -0.0726929 | 0.09894868 |
| sp Q9H0R4 HDHD2_HUMAN   | -0.0713644 | 0          |
| sp Q9H299 SH3L3_HUMAN   | -0.069746  | 0          |
| sp Q13177 PAK2_HUMAN    | -0.0695667 | 0          |
| sp Q04941 PLP2_HUMAN    | -0.0690918 | 0          |
| sp P62873 GBB1_HUMAN    | -0.0681915 | 0          |
| sp P45880-2 VDAC2_HUMAN | -0.0673237 | 0.05621411 |
| sp P43490 NAMPT_HUMAN   | -0.0672569 | 0.01044662 |
| sp Q7Z4I7-3 LIMS2_HUMAN | -0.0671597 | 0.1558116  |
| sp Q15365 PCBP1_HUMAN   | -0.0667362 | 0          |
| sp P54819-2 KAD2_HUMAN  | -0.0666943 | 0.06291623 |
| sp Q9NX63 MIC19_HUMAN   | -0.0662041 | 0.04454162 |
| sp Q16775-2 GLO2_HUMAN  | -0.0657921 | 0          |
| sp O75367-2 H2AY_HUMAN  | -0.0655289 | 0.7173901  |
| sp Q14011 CIRBP_HUMAN   | -0.0650826 | 0          |
| sp P15311 EZRI_HUMAN    | -0.0648251 | 0          |
| sp Q16762 THTR_HUMAN    | -0.064209  | 0          |
| sp Q16555 DPYL2_HUMAN   | -0.0632153 | 0.00697919 |
| sp O60825-2 F262_HUMAN  | -0.0624828 | 0          |
| sp P30519 HMOX2_HUMAN   | -0.0616455 | 0.06291623 |
| sp Q9NZL9-2 MAT2B_HUMAN | -0.061552  | 0          |
| sp P42330 AK1C3_HUMAN   | -0.0611553 | 0          |
| sp P63261 ACTG_HUMAN    | -0.0602112 | 0          |
| sp Q86TX2 ACOT1_HUMAN   | -0.0600452 | 0          |
| sp Q9NYL9 TMOD3_HUMAN   | -0.059082  | 0.26737198 |
| sp Q99439 CNN2_HUMAN    | -0.0587101 | 0          |
| sp Q99758 ABCA3_HUMAN   | -0.0586472 | 0.12897664 |
| sp Q9HCC0-2 MCCB_HUMAN  | -0.058363  | 0          |
| sp P07996 TSP1_HUMAN    | -0.057539  | 0.11949348 |
| sp Q92930 RAB8B_HUMAN   | -0.0572701 | 0          |
| sp P99999 CYC_HUMAN     | -0.0570908 | 0.17511293 |

|                         |            |            |
|-------------------------|------------|------------|
| sp Q8TC12-2 RDH11_HUMAN | -0.0570679 | 0          |
| sp Q7Z4W1 DCXR_HUMAN    | -0.0556526 | 0.2207585  |
| sp O00186 STXB3_HUMAN   | -0.0546236 | 0          |
| sp Q96C23 GALM_HUMAN    | -0.0544777 | 0          |
| sp P50552 VASP_HUMAN    | -0.0520458 | 0.1063047  |
| sp P25787 PSA2_HUMAN    | -0.051259  | 0.09339783 |
| sp P23141-3 EST1_HUMAN  | -0.050314  | 0.3280279  |
| sp Q02252-2 MMSA_HUMAN  | -0.0499554 | 0          |
| sp P16070-16 CD44_HUMAN | -0.0492497 | 0          |
| sp P23246 SFPO_HUMAN    | -0.048542  | 0.01178462 |
| sp Q00169 PIPNA_HUMAN   | -0.0477562 | 0          |
| sp P08397-2 HEM3_HUMAN  | -0.0477161 | 0          |
| sp P51572-2 BAP31_HUMAN | -0.0475101 | 0          |
| sp P47755 CAZA2_HUMAN   | -0.0473042 | 0          |
| sp O75368 SH3L1_HUMAN   | -0.0472336 | 0          |
| sp Q9UJ70-2 NAGK_HUMAN  | -0.0471306 | 0          |
| sp P60660-2 MYL6_HUMAN  | -0.0464764 | 0.02174174 |
| sp P29992 GNA11_HUMAN   | -0.0463944 | 0          |
| sp Q9BV20 MTNA_HUMAN    | -0.0460339 | 0          |
| sp Q9UBF2 COPG2_HUMAN   | -0.0459118 | 0          |
| sp P01861 IGHG4_HUMAN   | -0.0455151 | 0.09339783 |
| sp P0C0S5 H2AZ_HUMAN    | -0.0445843 | 0.656254   |
| sp Q02818 NUCB1_HUMAN   | -0.0444717 | 0.13242109 |
| sp Q86X76-2 NIT1_HUMAN  | -0.0444679 | 0          |
| sp Q9H6R3 ACSS3_HUMAN   | -0.0442333 | 0          |
| sp P36542 ATPG_HUMAN    | -0.0442181 | 0          |
| sp Q53H82 LACB2_HUMAN   | -0.0441055 | 0          |
| sp Q5JWF2-2 GNAS1_HUMAN | -0.0434113 | 0.14672586 |
| sp Q13185 CBX3_HUMAN    | -0.0433979 | 0          |
| sp O95831-3 AIFM1_HUMAN | -0.042366  | 0          |
| sp P15153 RAC2_HUMAN    | -0.0420895 | 0          |
| sp O95865 DDAH2_HUMAN   | -0.0420628 | 0.10943281 |
| sp Q01105-2 SET_HUMAN   | -0.0419197 | 0          |
| sp P29401-2 TKT_HUMAN   | -0.0417862 | 0.00283325 |
| sp P84095 RHOH_HUMAN    | -0.0417824 | 0.09894868 |
| sp P43121 MUC18_HUMAN   | -0.0415993 | 0.09894868 |
| sp P07737 PROF1_HUMAN   | -0.0405941 | 0.01542275 |
| sp O75923-15 DYSF_HUMAN | -0.0405731 | 0          |
| sp Q9UBQ7 GRHPR_HUMAN   | -0.0393753 | 0          |
| sp P35754 GLRX1_HUMAN   | -0.0369988 | 0          |
| sp P07099 HYEP_HUMAN    | -0.0364685 | 0.07334998 |
| sp Q9HBL0 TENS1_HUMAN   | -0.035553  | 0.03357808 |
| sp Q9UHQ9 NB5R1_HUMAN   | -0.0352039 | 0          |
| sp Q969H8 MYDGF_HUMAN   | -0.0350952 | 0          |
| sp P42126-2 ECI1_HUMAN  | -0.0346661 | 0          |

|                         |            |            |
|-------------------------|------------|------------|
| sp Q15435 PP1R7_HUMAN   | -0.0337143 | 0          |
| sp P52565 GDIR1_HUMAN   | -0.0334282 | 0          |
| sp P28072 PSB6_HUMAN    | -0.0333176 | 0          |
| sp P62826 RAN_HUMAN     | -0.0331192 | 0          |
| sp P35914 HMGCL_HUMAN   | -0.0307579 | 0          |
| sp Q9UIJ7 KAD3_HUMAN    | -0.02985   | 0          |
| sp P09497-2 CLCB_HUMAN  | -0.029747  | 0          |
| sp P54619-2 AAKG1_HUMAN | -0.0290756 | 0          |
| sp P09382 LEG1_HUMAN    | -0.0286884 | 0.07727676 |
| sp Q9BTW9-4 TBCD_HUMAN  | -0.0284729 | 0.35795313 |
| sp P09651-3 ROA1_HUMAN  | -0.0281925 | 0          |
| sp P09622 DLDH_HUMAN    | -0.0281639 | 0          |
| sp O95425-4 SVIL_HUMAN  | -0.0280705 | 0.19149946 |
| sp Q92597 NDRG1_HUMAN   | -0.0280476 | 0          |
| sp P00367 DHE3_HUMAN    | -0.0277596 | 0.1804695  |
| sp Q99829 CPNE1_HUMAN   | -0.027256  | 0          |
| sp P35237 SPB6_HUMAN    | -0.0268784 | 0          |
| sp O00764-2 PDXK_HUMAN  | -0.0257845 | 0          |
| sp Q9Y696 CLIC4_HUMAN   | -0.0255718 | 0          |
| sp O60488-2 ACSL4_HUMAN | -0.025095  | 0          |
| sp P48449-3 ERG7_HUMAN  | -0.024744  | 0.09339783 |
| sp Q9P0V9-2 SEP10_HUMAN | -0.0247288 | 0.19410844 |
| sp Q8IWB7 WDFY1_HUMAN   | -0.0238762 | 0          |
| sp Q9NQC3 RTN4_HUMAN    | -0.0238743 | 0.4075265  |
| sp P60900 PSA6_HUMAN    | -0.0237389 | 0          |
| sp P17612 KAPCA_HUMAN   | -0.0231209 | 0          |
| sp P35232 PHB_HUMAN     | -0.0230751 | 0.10280301 |
| sp P16671-4 CD36_HUMAN  | -0.0226364 | 0          |
| sp Q13126-2 MTAP_HUMAN  | -0.0224609 | 0          |
| sp Q06830 PRDX1_HUMAN   | -0.0222092 | 0          |
| sp O94925-3 GLSK_HUMAN  | -0.0220337 | 0          |
| sp Q63ZY3-3 KANK2_HUMAN | -0.021616  | 0.10017801 |
| sp P35222 CTNB1_HUMAN   | -0.0215702 | 0          |
| sp P06576 ATPB_HUMAN    | -0.0206337 | 0.02802646 |
| sp P35579 MYH9_HUMAN    | -0.0205517 | 0.08383793 |
| sp O75131 CPNE3_HUMAN   | -0.0202427 | 0          |
| sp Q14103-3 HNRPD_HUMAN | -0.020031  | 0.2174103  |
| sp Q9UBI6 GBG12_HUMAN   | -0.0200176 | 0          |
| sp P21964-2 COMT_HUMAN  | -0.0195427 | 0.05681695 |
| sp P06733 ENOA_HUMAN    | -0.0193062 | 0          |
| sp Q86UX7-2 URP2_HUMAN  | -0.0184803 | 0          |
| sp P07437 TBB5_HUMAN    | -0.01824   | 0          |
| sp P12111 CO6A3_HUMAN   | -0.0179119 | 0.06534385 |
| sp P43034 LIS1_HUMAN    | -0.0177155 | 0          |
| sp Q96EE3-1 SEH1_HUMAN  | -0.0176563 | 0          |



|                          |            |            |
|--------------------------|------------|------------|
| sp Q9Y3A3-3 PHOCN_HUMAN  | -0.0176315 | 0          |
| sp Q16787-3 LAMA3_HUMAN  | -0.0172977 | 0.19149946 |
| sp Q30134 2B18_HUMAN     | -0.0172691 | 0          |
| sp P08575-10 PTPRC_HUMAN | -0.0172577 | 0.03712561 |
| sp P02545 LMNA_HUMAN     | -0.0169697 | 0          |
| sp P58546 MTPN_HUMAN     | -0.0166969 | 0          |
| sp Q9NUJ1 ABHDA_HUMAN    | -0.0163937 | 0          |
| sp Q27J81-2 INF2_HUMAN   | -0.0160847 | 0          |
| sp O00291 HIP1_HUMAN     | -0.015564  | 0          |
| sp P61978-3 HNRPK_HUMAN  | -0.0155582 | 0.07488067 |
| sp O15143 ARC1B_HUMAN    | -0.0134087 | 0.16077396 |
| sp Q9Y4D7-2 PLXD1_HUMAN  | -0.0131512 | 0          |
| sp O00232 PSD12_HUMAN    | -0.0130339 | 0          |
| sp P35580 MYH10_HUMAN    | -0.0128746 | 0.22968848 |
| sp P61960 UFM1_HUMAN     | -0.0125237 | 0.19149946 |
| sp P14678 RSMB_HUMAN     | -0.0124016 | 0.19149946 |
| sp P39060-1 COIA1_HUMAN  | -0.0120888 | 0.1329664  |
| sp Q96I99 SUCB2_HUMAN    | -0.0115719 | 0.05634482 |
| sp P24539 AT5F1_HUMAN    | -0.0113602 | 0          |
| sp O95571 ETHE1_HUMAN    | -0.0110626 | 0.12897664 |
| sp Q00325-2 MPCP_HUMAN   | -0.0107231 | 0.04454162 |
| sp P06737-2 PYGL_HUMAN   | -0.0093956 | 0          |
| sp Q13423 NNTM_HUMAN     | -0.0086002 | 0.06695005 |
| sp Q92542 NICA_HUMAN     | -0.0081158 | 0          |
| sp P46939-2 UTRO_HUMAN   | -0.0080109 | 0.08490886 |
| sp P55036-2 PSMD4_HUMAN  | -0.0079174 | 0          |
| sp P51553-2 IDH3G_HUMAN  | -0.0075531 | 0          |
| sp O75323 NIPS2_HUMAN    | -0.0074463 | 0          |
| sp P10606 COX5B_HUMAN    | -0.0064774 | 0          |
| sp Q8IY17-3 PLPL6_HUMAN  | -0.0059624 | 0          |
| sp Q9H223 EHD4_HUMAN     | -0.0055313 | 0.12992796 |
| sp Q9NTK5 OLA1_HUMAN     | -0.0051537 | 0.30372584 |
| sp P19338 NUCL_HUMAN     | -0.0046253 | 0.05276814 |
| sp P30041 PRDX6_HUMAN    | -0.0042515 | 0.04897772 |
| sp Q6P1N9 TATD1_HUMAN    | -0.0037842 | 0          |
| sp Q09028-3 RBBP4_HUMAN  | -0.0037346 | 0          |
| sp O43684-2 BUB3_HUMAN   | -0.0033245 | 0          |
| sp Q08431 MFGM_HUMAN     | -0.0025101 | 0          |
| sp Q96AG4 LRC59_HUMAN    | -0.0024853 | 0.04454162 |
| sp O14950 ML12B_HUMAN    | -0.0018234 | 0          |
| sp P62258 1433E_HUMAN    | -9.19E-04  | 0.01406953 |
| sp P63241 IF5A1_HUMAN    | -2.57E-04  | 0.17319627 |
| sp P14923 PLAK_HUMAN     | -1.83E-04  | 0          |
| sp Q13043 STK4_HUMAN     | 7.30E-04   | 0          |
| sp O00264 PGRC1_HUMAN    | 0.00156021 | 0          |

|                         |            |            |
|-------------------------|------------|------------|
| sp P27816-2 MAP4_HUMAN  | 0.00198746 | 0          |
| sp Q8TE77-3 SSH3_HUMAN  | 0.00264931 | 0          |
| sp P05023-4 AT1A1_HUMAN | 0.00332642 | 0.02068257 |
| sp P00387-3 NB5R3_HUMAN | 0.00403404 | 0.01819076 |
| sp Q9Y5S9-2 RBM8A_HUMAN | 0.00444222 | 0.35795313 |
| sp P08758 ANXA5_HUMAN   | 0.00541687 | 0          |
| sp P61158 ARP3_HUMAN    | 0.00552177 | 0.00952955 |
| sp Q03252 LMNB2_HUMAN   | 0.00562668 | 0.41310343 |
| sp Q04917 1433F_HUMAN   | 0.00649834 | 0          |
| sp O95372 LYPA2_HUMAN   | 0.00664902 | 0          |
| sp O94832 MYO1D_HUMAN   | 0.0075779  | 0          |
| sp Q9C0C2-2 TB182_HUMAN | 0.0075779  | 0          |
| sp Q13596-2 SNX1_HUMAN  | 0.00821877 | 0          |
| sp Q9UBV8 PEF1_HUMAN    | 0.00862312 | 0          |
| sp Q13642-1 FHL1_HUMAN  | 0.0088768  | 0          |
| sp Q13884 SNTB1_HUMAN   | 0.00986671 | 0          |
| sp P49748-2 ACADV_HUMAN | 0.01005364 | 0.08626214 |
| sp P61018 RAB4B_HUMAN   | 0.01009369 | 0          |
| sp Q13561-2 DCTN2_HUMAN | 0.0104332  | 0          |
| sp Q02978 M2OM_HUMAN    | 0.01054192 | 0.03367973 |
| sp P48047 ATPO_HUMAN    | 0.01060486 | 0.35262254 |
| sp Q6UWY5 OLFL1_HUMAN   | 0.01118851 | 0.356152   |
| sp P22894 MMP8_HUMAN    | 0.01152992 | 0          |
| sp P61225 RAP2B_HUMAN   | 0.01169395 | 0          |
| sp P05198 IF2A_HUMAN    | 0.01189995 | 0          |
| sp P22626 ROA2_HUMAN    | 0.01221085 | 0.01700861 |
| sp Q16204 CCDC6_HUMAN   | 0.01342773 | 0          |
| sp Q8WUY1 THEM6_HUMAN   | 0.01368332 | 0.09894868 |
| sp Q5TDH0-3 DDI2_HUMAN  | 0.01380539 | 0          |
| sp P61981 1433G_HUMAN   | 0.01423264 | 0.1329664  |
| sp Q14165 MLEC_HUMAN    | 0.01428223 | 0          |
| sp Q15370-2 ELOB_HUMAN  | 0.01439858 | 0          |
| sp Q96CX2 KCD12_HUMAN   | 0.0146637  | 0          |
| sp P47985 UCRI_HUMAN    | 0.01494503 | 0.09894868 |
| sp Q99584 S10AD_HUMAN   | 0.01558876 | 0.45033538 |
| sp Q9NT62-2 ATG3_HUMAN  | 0.01576042 | 0          |
| sp P30050 RL12_HUMAN    | 0.01670456 | 0.26737198 |
| sp O43813 LANC1_HUMAN   | 0.01743889 | 0          |
| sp Q9UNH7 SNX6_HUMAN    | 0.01864815 | 0          |
| sp O60271-5 JIP4_HUMAN  | 0.01882553 | 0          |
| sp Q14498-2 RBM39_HUMAN | 0.01942635 | 0.21439649 |
| sp O75643 U520_HUMAN    | 0.0198822  | 0          |
| sp Q15836 VAMP3_HUMAN   | 0.02014923 | 0          |
| sp Q9BXS5-2 AP1M1_HUMAN | 0.02041245 | 0          |
| sp Q9HAV0 GBB4_HUMAN    | 0.02114296 | 0          |

|                          |            |            |
|--------------------------|------------|------------|
| sp P30084 ECHM_HUMAN     | 0.02119064 | 0          |
| sp Q9H0E2 TOLIP_HUMAN    | 0.02149773 | 0          |
| sp P10809 CH60_HUMAN     | 0.02242279 | 0          |
| sp P48681 NEST_HUMAN     | 0.02249146 | 0          |
| sp P02511 CRYAB_HUMAN    | 0.02252579 | 0          |
| sp P21810 PGS1_HUMAN     | 0.02258492 | 0.31786543 |
| sp P50453 SPB9_HUMAN     | 0.02312088 | 0          |
| sp O94905 ERLN2_HUMAN    | 0.02335548 | 0          |
| sp P21283 VATC1_HUMAN    | 0.02342606 | 0          |
| sp Q99426 TBCB_HUMAN     | 0.02366257 | 0          |
| sp Q9HB40 RISC_HUMAN     | 0.02371597 | 0          |
| sp P29218 IMPA1_HUMAN    | 0.02402496 | 0.09339783 |
| sp Q15637-3 SF01_HUMAN   | 0.02417946 | 0          |
| sp P18206-2 VINC_HUMAN   | 0.02446365 | 0.01248471 |
| sp Q14651 PLSI_HUMAN     | 0.02458    | 0          |
| sp P63167 DYL1_HUMAN     | 0.02480698 | 0          |
| sp P51649-2 SSDH_HUMAN   | 0.02513886 | 0          |
| sp O75436 VP26A_HUMAN    | 0.02536964 | 0          |
| sp Q96C19 EFHD2_HUMAN    | 0.02555084 | 0          |
| sp P27361 MK03_HUMAN     | 0.02566528 | 0          |
| sp Q13451 FKBP5_HUMAN    | 0.02602577 | 0          |
| sp P25786-2 PSA1_HUMAN   | 0.02628326 | 0.06210651 |
| sp Q13418 ILK_HUMAN      | 0.02643395 | 0          |
| sp P52209-2 6PGD_HUMAN   | 0.02648544 | 0          |
| sp Q8N8S7-2 ENAH_HUMAN   | 0.02660561 | 0          |
| sp P11216 PYGB_HUMAN     | 0.02708817 | 0.1007388  |
| sp Q9UHX1-2 PUF60_HUMAN  | 0.02717781 | 0          |
| sp Q14847 LASP1_HUMAN    | 0.02728081 | 0          |
| sp P62136 PP1A_HUMAN     | 0.02768898 | 0          |
| sp P38646 GRP75_HUMAN    | 0.02771378 | 0          |
| sp Q9HC35-2 EMAL4_HUMAN  | 0.02794838 | 0.07727676 |
| sp P49354 FNNTA_HUMAN    | 0.02811432 | 0          |
| sp P09525 ANXA4_HUMAN    | 0.02853203 | 0          |
| sp O60716-14 CTND1_HUMAN | 0.02931595 | 0          |
| sp P08571 CD14_HUMAN     | 0.02953911 | 0.3005443  |
| sp Q9UNF0-2 PACN2_HUMAN  | 0.02977753 | 0          |
| sp P51991 ROA3_HUMAN     | 0.02988625 | 0          |
| sp P41250 GARS_HUMAN     | 0.02997494 | 0          |
| sp Q14019 COTL1_HUMAN    | 0.03052521 | 0.03367973 |
| sp Q9NVD7 PARVA_HUMAN    | 0.03081894 | 0.08891098 |
| sp O95202 LETM1_HUMAN    | 0.03083038 | 0.45563722 |
| sp P41240 CSK_HUMAN      | 0.03131485 | 0          |
| sp O75947-2 ATP5H_HUMAN  | 0.03141403 | 0          |
| sp P52788 SPSY_HUMAN     | 0.03185272 | 0.7061832  |
| sp P61457 PHS_HUMAN      | 0.03261375 | 0          |

|                         |            |            |
|-------------------------|------------|------------|
| sp P05452 TETN_HUMAN    | 0.03282547 | 0.09894868 |
| sp Q9Y315 DEOC_HUMAN    | 0.03310871 | 0          |
| sp Q9NTJ5 SAC1_HUMAN    | 0.03327942 | 0          |
| sp P36776-2 LONM_HUMAN  | 0.03398514 | 0          |
| sp P23786 CPT2_HUMAN    | 0.0344944  | 0.02662771 |
| sp P09543-2 CN37_HUMAN  | 0.03514099 | 0          |
| sp Q10567-2 AP1B1_HUMAN | 0.03515816 | 0.21439649 |
| sp P11310-2 ACADM_HUMAN | 0.03532028 | 0.14969608 |
| sp Q5SSJ5-2 HP1B3_HUMAN | 0.03573608 | 0.0846519  |
| sp P25398 RS12_HUMAN    | 0.03617477 | 0          |
| sp O15145 ARPC3_HUMAN   | 0.03647995 | 0          |
| sp P09917-3 LOX5_HUMAN  | 0.03720856 | 0          |
| sp P62330 ARF6_HUMAN    | 0.03725815 | 0          |
| sp Q86UP2-4 KTN1_HUMAN  | 0.0373764  | 0          |
| sp P02794 FRIH_HUMAN    | 0.03756332 | 0          |
| sp P61160 ARP2_HUMAN    | 0.03810692 | 0.01343579 |
| sp P10515 ODP2_HUMAN    | 0.03873444 | 0.29934928 |
| sp P07237 PDIA1_HUMAN   | 0.03928375 | 0.12736098 |
| sp Q9UUK9 NUDT5_HUMAN   | 0.03969002 | 0          |
| sp P06756-3 ITAV_HUMAN  | 0.04034042 | 0.3201336  |
| sp Q6KB66-2 K2C80_HUMAN | 0.04043961 | 0          |
| sp P27487 DPP4_HUMAN    | 0.04086685 | 0.1558116  |
| sp Q96CN7 ISOC1_HUMAN   | 0.04141235 | 0          |
| sp P60228 EIF3E_HUMAN   | 0.04163742 | 0.30372584 |
| sp P04899-3 GNAI2_HUMAN | 0.04178619 | 0          |
| sp Q92696 PGTA_HUMAN    | 0.04196549 | 0          |
| sp P98160 PGBM_HUMAN    | 0.0420475  | 0.58386195 |
| sp O00391 QSOX1_HUMAN   | 0.04207039 | 0.17319627 |
| sp Q9NP72-2 RAB18_HUMAN | 0.04227066 | 0          |
| sp O75881 CP7B1_HUMAN   | 0.04227352 | 0          |
| sp Q8NBF2-2 NHLC2_HUMAN | 0.04236221 | 0          |
| sp Q8WZA0-2 LZIC_HUMAN  | 0.04313564 | 0          |
| sp P17980 PRS6A_HUMAN   | 0.04345322 | 0          |
| sp P62191-2 PRS4_HUMAN  | 0.04355621 | 0          |
| sp P12830 CADH1_HUMAN   | 0.04360199 | 0          |
| sp P55072 TERA_HUMAN    | 0.04423523 | 0.072567   |
| sp P31321 KAP1_HUMAN    | 0.04428101 | 0          |
| sp O00231-2 PSD11_HUMAN | 0.04453468 | 0.24097534 |
| sp P62942 FKB1A_HUMAN   | 0.04472351 | 0          |
| sp P54920 SNAA_HUMAN    | 0.04498482 | 0.01551361 |
| sp P62879 GBB2_HUMAN    | 0.04508209 | 0.20467198 |
| sp P13861 KAP2_HUMAN    | 0.04535294 | 0          |
| sp P39687 AN32A_HUMAN   | 0.04599381 | 0          |
| sp Q9Y2J2-4 E41L3_HUMAN | 0.04604149 | 0          |
| sp P51178-2 PLCD1_HUMAN | 0.04709053 | 0.09894868 |

|                         |            |            |
|-------------------------|------------|------------|
| sp P13693 TCTP_HUMAN    | 0.04713059 | 0          |
| sp Q9P0L0-2 VAPA_HUMAN  | 0.04745483 | 0.20467198 |
| sp Q13505-3 MTX1_HUMAN  | 0.04804421 | 0          |
| sp P53597 SUCA_HUMAN    | 0.04840851 | 0          |
| sp P53992 SC24C_HUMAN   | 0.04844284 | 0          |
| sp Q9Y3F4-2 STRAP_HUMAN | 0.04914284 | 0          |
| sp O15031 PLXB2_HUMAN   | 0.04950523 | 0.35262254 |
| sp P38919 IF4A3_HUMAN   | 0.04988289 | 0.11949348 |
| sp Q8N1G4 LRC47_HUMAN   | 0.0504036  | 0          |
| sp O75608-2 LYPA1_HUMAN | 0.05043411 | 0          |
| sp O95573 ACSL3_HUMAN   | 0.05059433 | 0          |
| sp Q04206-3 TF65_HUMAN  | 0.05144405 | 0.19149946 |
| sp Q9BS26 ERP44_HUMAN   | 0.05167961 | 0          |
| sp O14558 HSPB6_HUMAN   | 0.05219555 | 0.09750395 |
| sp Q96HY6 DDRKG_HUMAN   | 0.05244064 | 0.09750395 |
| sp P22392-2 NDKB_HUMAN  | 0.05315399 | 0          |
| sp O94804 STK10_HUMAN   | 0.05322647 | 0          |
| sp Q9NRN5 OLFL3_HUMAN   | 0.05368614 | 0          |
| sp P20618 PSB1_HUMAN    | 0.0538578  | 0          |
| sp P51858 HDGF_HUMAN    | 0.05406761 | 0          |
| sp P46976 GLYG_HUMAN    | 0.05490494 | 0          |
| sp P68104 EF1A1_HUMAN   | 0.05498886 | 0.1007388  |
| sp P63010-2 AP2B1_HUMAN | 0.0558815  | 0.16649151 |
| sp P01111 RASN_HUMAN    | 0.0561161  | 0          |
| sp P56537 IF6_HUMAN     | 0.05626106 | 0.5111962  |
| sp Q9H4G4 GAPR1_HUMAN   | 0.05633926 | 0          |
| sp Q6UVK1 CSPG4_HUMAN   | 0.05686188 | 0.1500082  |
| sp Q9UH99-2 SUN2_HUMAN  | 0.05696964 | 0.14672586 |
| sp P25705 ATPA_HUMAN    | 0.05798721 | 0.00348549 |
| sp P21281 VATB2_HUMAN   | 0.05834484 | 0.31741163 |
| sp Q13404 UB2V1_HUMAN   | 0.05894852 | 0.45033538 |
| sp P09871 C1S_HUMAN     | 0.05919647 | 0.7588735  |
| sp P61163 ACTZ_HUMAN    | 0.05922508 | 0          |
| sp P19367-3 H XK1_HUMAN | 0.0592556  | 0.02228302 |
| sp Q9Y394-2 DHRS7_HUMAN | 0.05980682 | 0.06291623 |
| sp Q07954 LRP1_HUMAN    | 0.06020355 | 0.00822741 |
| sp Q9UMS4 PRP19_HUMAN   | 0.06027031 | 0.09894868 |
| sp Q9NZ01 TECR_HUMAN    | 0.06038475 | 0          |
| sp P36871 PGM1_HUMAN    | 0.06097794 | 0          |
| sp Q9UQ80 PA2G4_HUMAN   | 0.06113434 | 0          |
| sp Q9H0W9-2 CK054_HUMAN | 0.06166077 | 0.10861364 |
| sp Q96QK1 VPS35_HUMAN   | 0.06183624 | 0          |
| sp Q9Y490 TLN1_HUMAN    | 0.06209374 | 0.15866357 |
| sp P19474 RO52_HUMAN    | 0.06228447 | 0          |
| sp P25789 PSA4_HUMAN    | 0.06246948 | 0          |

|                         |            |            |
|-------------------------|------------|------------|
| sp O60313-10 OPA1_HUMAN | 0.06249523 | 0          |
| sp P55854-2 SUMO3_HUMAN | 0.06281662 | 0          |
| sp P60174 TPIS_HUMAN    | 0.06317329 | 0          |
| sp P04083 ANXA1_HUMAN   | 0.06331444 | 0          |
| sp Q96EP5-2 DAZP1_HUMAN | 0.06368446 | 0          |
| sp P62316 SMD2_HUMAN    | 0.0638504  | 0          |
| sp P00505 AATM_HUMAN    | 0.06422043 | 0.01178462 |
| sp P46940 IQGA1_HUMAN   | 0.06481934 | 0.07054878 |
| sp P17174 AATC_HUMAN    | 0.06544876 | 0          |
| sp P12109 CO6A1_HUMAN   | 0.06548691 | 0.19276452 |
| sp P62333 PRS10_HUMAN   | 0.06593704 | 0          |
| sp P05166-2 PCCB_HUMAN  | 0.066082   | 0.16214149 |
| sp P35998 PRS7_HUMAN    | 0.06610298 | 0          |
| sp P12081-4 SYHC_HUMAN  | 0.06632614 | 0          |
| sp P22061-2 PIMT_HUMAN  | 0.06648254 | 0.34323573 |
| sp P23142 FBLN1_HUMAN   | 0.0667038  | 0          |
| sp P30086 PEBP1_HUMAN   | 0.06760597 | 0          |
| sp P46108 CRK_HUMAN     | 0.06768036 | 0          |
| sp Q16543 CDC37_HUMAN   | 0.06779671 | 0          |
| sp P61923-5 COPZ1_HUMAN | 0.06784821 | 0          |
| sp Q8TAT6-2 NPL4_HUMAN  | 0.06818676 | 0          |
| sp O75521-2 ECI2_HUMAN  | 0.06826401 | 0          |
| sp P04632 CPNS1_HUMAN   | 0.06835365 | 0.06842031 |
| sp Q9BR76 COR1B_HUMAN   | 0.06848145 | 0          |
| sp Q8NBJ7 SUMF2_HUMAN   | 0.06858444 | 0          |
| sp O00478-2 BT3A3_HUMAN | 0.06892586 | 0          |
| sp Q9UKV3-5 ACINU_HUMAN | 0.07006455 | 0.5111962  |
| sp P01911 2B1F_HUMAN    | 0.07015991 | 0          |
| sp P49591 SYSC_HUMAN    | 0.07018089 | 0.14338206 |
| sp Q9ULA0 DNPEP_HUMAN   | 0.07032967 | 0.26737198 |
| sp P60709 ACTB_HUMAN    | 0.07057571 | 0          |
| sp P63000-2 RAC1_HUMAN  | 0.07070541 | 0          |
| sp Q9BVG4 PBDC1_HUMAN   | 0.07104492 | 0.45033538 |
| sp Q8WYA6-2 CTBL1_HUMAN | 0.07161903 | 0          |
| sp P53004 BIEA_HUMAN    | 0.07174492 | 0          |
| sp P48643 TCPE_HUMAN    | 0.07200813 | 0.08255737 |
| sp Q07812-2 BAX_HUMAN   | 0.07214356 | 0          |
| sp P55039 DRG2_HUMAN    | 0.07259178 | 0          |
| sp O94911-3 ABCA8_HUMAN | 0.07261467 | 0          |
| sp P30838 AL3A1_HUMAN   | 0.072855   | 0          |
| sp O00483 NDUA4_HUMAN   | 0.07288742 | 0          |
| sp Q96FW1 OTUB1_HUMAN   | 0.07293129 | 0          |
| sp P25788-2 PSA3_HUMAN  | 0.07302094 | 0          |
| sp Q7Z6Z7-2 HUWE1_HUMAN | 0.07323456 | 0          |
| sp Q13488 VPP3_HUMAN    | 0.07357979 | 0          |

|                         |            |            |
|-------------------------|------------|------------|
| sp P46926 GNPI1_HUMAN   | 0.07376862 | 0          |
| sp Q9UJU6-2 DBNL_HUMAN  | 0.07385635 | 0          |
| sp P63104 1433Z_HUMAN   | 0.07459259 | 0.07367946 |
| sp O75439 MPPB_HUMAN    | 0.07481575 | 0          |
| sp P49720 PSB3_HUMAN    | 0.07499313 | 0.09339783 |
| sp P30491 1B53_HUMAN    | 0.07558823 | 0          |
| sp O15372 EIF3H_HUMAN   | 0.07565498 | 0          |
| sp Q9H0D6 XRN2_HUMAN    | 0.07584381 | 0          |
| sp P67936 TPM4_HUMAN    | 0.07620239 | 0          |
| sp Q9NUQ9 FA49B_HUMAN   | 0.076231   | 0          |
| sp P26368-2 U2AF2_HUMAN | 0.07719231 | 0.7061832  |
| sp Q99623 PHB2_HUMAN    | 0.07824326 | 0.35520625 |
| sp Q9BRA2 TXD17_HUMAN   | 0.07856178 | 0          |
| sp Q8N392 RHG18_HUMAN   | 0.07903481 | 0          |
| sp P61956-2 SUMO2_HUMAN | 0.07972908 | 0          |
| sp Q9H3H3-1 CK068_HUMAN | 0.08019257 | 0          |
| sp Q9NZM1-3 MYOF_HUMAN  | 0.08030701 | 0          |
| sp O75369-2 FLNB_HUMAN  | 0.080616   | 0.08459944 |
| sp O60256-3 KPRB_HUMAN  | 0.0806675  | 0.06291623 |
| sp Q9Y6B6 SAR1B_HUMAN   | 0.08084106 | 0          |
| sp P31946 1433B_HUMAN   | 0.08097267 | 0          |
| sp P42025 ACTY_HUMAN    | 0.08220291 | 0          |
| sp Q06136 KDSR_HUMAN    | 0.08253479 | 0          |
| sp Q99460-2 PSMD1_HUMAN | 0.08286476 | 0          |
| sp P17655 CAN2_HUMAN    | 0.08290672 | 0.3425803  |
| sp Q9BSJ8-2 ESYT1_HUMAN | 0.08322525 | 0.07841589 |
| sp P54802 ANAG_HUMAN    | 0.08432007 | 0          |
| sp Q9NR19-2 ACSA_HUMAN  | 0.08446121 | 0          |
| sp Q9TQE0 2B19_HUMAN    | 0.08470917 | 0          |
| sp P01833 PIGR_HUMAN    | 0.08501816 | 0.7118947  |
| sp E9PAV3 NACAM_HUMAN   | 0.08581924 | 0          |
| sp Q9UI12-2 VATH_HUMAN  | 0.08588409 | 0          |
| sp Q7Z7H5-3 TMED4_HUMAN | 0.08642197 | 0          |
| sp Q08380 LG3BP_HUMAN   | 0.08642387 | 0.9968222  |
| sp Q5EBM0-3 CMPK2_HUMAN | 0.08713341 | 0.09894868 |
| sp P08648 ITA5_HUMAN    | 0.08716202 | 0          |
| sp Q6PCB0 VWA1_HUMAN    | 0.08772659 | 0          |
| sp Q9NRV9 HEBP1_HUMAN   | 0.08802223 | 0.21439649 |
| sp O14672 ADA10_HUMAN   | 0.0883522  | 0          |
| sp Q00765 REEP5_HUMAN   | 0.08835793 | 0          |
| sp P08134 RHOC_HUMAN    | 0.08866882 | 0          |
| sp P20700 LMNB1_HUMAN   | 0.08867455 | 0.23855431 |
| sp P63096 GNAI1_HUMAN   | 0.08873749 | 0          |
| sp P25325-2 THTM_HUMAN  | 0.08904266 | 0.09750395 |
| sp Q86WV6 STING_HUMAN   | 0.08918572 | 0          |

|                         |            |            |
|-------------------------|------------|------------|
| sp Q9Y6E0 STK24_HUMAN   | 0.0892334  | 0          |
| sp Q96IU4 ABHEB_HUMAN   | 0.08974838 | 0          |
| sp P61970 NTF2_HUMAN    | 0.09016991 | 0          |
| sp Q8NHV1 GIMA7_HUMAN   | 0.09054756 | 0.2178309  |
| sp P16152 CBR1_HUMAN    | 0.09055901 | 0          |
| sp O00429-3 DNM1L_HUMAN | 0.09119415 | 0          |
| sp Q96BW5-2 PTER_HUMAN  | 0.0912075  | 0          |
| sp O43148-2 MCES_HUMAN  | 0.09197617 | 0          |
| sp Q96HC4 PDLI5_HUMAN   | 0.0922966  | 0.23973103 |
| sp P52790 HXK3_HUMAN    | 0.0926342  | 0          |
| sp Q96BM9 ARL8A_HUMAN   | 0.09316063 | 0          |
| sp Q9BRF8 CPPED_HUMAN   | 0.09344864 | 0          |
| sp P17844-2 DDX5_HUMAN  | 0.09367561 | 0          |
| sp Q16527 CSRP2_HUMAN   | 0.09371567 | 0          |
| sp P55795 HNRH2_HUMAN   | 0.0942955  | 0          |
| sp P49903-2 SPS1_HUMAN  | 0.09481049 | 0          |
| sp P07741 APT_HUMAN     | 0.09528923 | 0          |
| sp O60784 TOM1_HUMAN    | 0.09541512 | 0          |
| sp P21291 CSRP1_HUMAN   | 0.09549713 | 0.0315703  |
| sp O75083 WDR1_HUMAN    | 0.09617996 | 0          |
| sp P55263 ADK_HUMAN     | 0.09657288 | 0          |
| sp Q5JRX3-2 PREP_HUMAN  | 0.09781075 | 0          |
| sp Q9BUT1 BDH2_HUMAN    | 0.09787369 | 0          |
| sp P14868 SYDC_HUMAN    | 0.09796715 | 0.01551361 |
| sp O75937 DNJC8_HUMAN   | 0.0989666  | 0.30372584 |
| sp Q03154-4 ACY1_HUMAN  | 0.09907532 | 0.23541966 |
| sp Q8NBX0 SCPD_L_HUMAN  | 0.09908104 | 0          |
| sp P18669 PGAM1_HUMAN   | 0.10009193 | 0          |
| sp P13073 COX41_HUMAN   | 0.10057449 | 0          |
| sp P54652 HSP72_HUMAN   | 0.10092545 | 0          |
| sp O60506-3 HNRPQ_HUMAN | 0.1015892  | 0.02662771 |
| sp Q9UGI8-2 TES_HUMAN   | 0.10428906 | 0.02174174 |
| sp P55327-3 TPD52_HUMAN | 0.10555649 | 0.2178309  |
| sp O95197-2 RTN3_HUMAN  | 0.10565186 | 0          |
| sp P06748-3 NPM_HUMAN   | 0.10582733 | 0          |
| sp P30533 AMRP_HUMAN    | 0.10610771 | 0          |
| sp P55084 ECHB_HUMAN    | 0.10658073 | 0.11920157 |
| sp Q5T440 CAF17_HUMAN   | 0.10663605 | 0          |
| sp P13489 RINI_HUMAN    | 0.10691452 | 0.1069263  |
| sp Q13148 TADBP_HUMAN   | 0.10728836 | 0          |
| sp Q9BPW8 NIPS1_HUMAN   | 0.10748482 | 0          |
| sp Q96HE7 ERO1A_HUMAN   | 0.1076088  | 0          |
| sp P07195 LDHB_HUMAN    | 0.10762405 | 0.12561582 |
| sp O94919 ENDD1_HUMAN   | 0.10768318 | 0.06291623 |
| sp Q92820 GGH_HUMAN     | 0.10769844 | 0.19149946 |



|                         |            |            |
|-------------------------|------------|------------|
| sp P60842 IF4A1_HUMAN   | 0.10802651 | 0.01178462 |
| sp Q13724-2 MOGS_HUMAN  | 0.10865212 | 0.03043297 |
| sp P55209-2 NP1L1_HUMAN | 0.1091919  | 0          |
| sp P17301 ITA2_HUMAN    | 0.10932732 | 0          |
| sp P51692 STA5B_HUMAN   | 0.10950661 | 0          |
| sp Q9Y285 SYFA_HUMAN    | 0.10950947 | 0          |
| sp P07203 GPX1_HUMAN    | 0.10984421 | 0          |
| sp P27694 RFA1_HUMAN    | 0.11042786 | 0.20467198 |
| sp O15254-2 ACOX3_HUMAN | 0.11067009 | 0          |
| sp Q99961-2 SH3G1_HUMAN | 0.11090469 | 0          |
| sp Q01130-2 SRSF2_HUMAN | 0.11103058 | 0.2178309  |
| sp Q14139-2 UBE4A_HUMAN | 0.1117096  | 0          |
| sp Q92947 GCDH_HUMAN    | 0.11206818 | 0          |
| sp O00116 ADAS_HUMAN    | 0.11249733 | 0          |
| sp P31942-2 HNRH3_HUMAN | 0.11266518 | 0.7498006  |
| sp Q16576-2 RBBP7_HUMAN | 0.11292267 | 0          |
| sp P34897-3 GLYM_HUMAN  | 0.11415291 | 0          |
| sp P02743 SAMP_HUMAN    | 0.11421204 | 0          |
| sp P50570-5 DYN2_HUMAN  | 0.11500931 | 0.14927356 |
| sp O95861-4 BPNT1_HUMAN | 0.11545181 | 0.03367973 |
| sp Q14203-4 DCTN1_HUMAN | 0.11605454 | 0.12054814 |
| sp P21980 TGM2_HUMAN    | 0.11677933 | 0.12200338 |
| sp P00918 CAH2_HUMAN    | 0.1169529  | 0.13973783 |
| sp P09493-5 TPM1_HUMAN  | 0.11726761 | 0.19149946 |
| sp O75475 PSIP1_HUMAN   | 0.11728859 | 0          |
| sp O75396 SC22B_HUMAN   | 0.11754799 | 0          |
| sp P08621-2 RU17_HUMAN  | 0.11837006 | 0.04454162 |
| sp P12955 PEPD_HUMAN    | 0.1183815  | 0          |
| sp Q9UNZ2-5 NSF1C_HUMAN | 0.11868858 | 0          |
| sp P52907 CAZA1_HUMAN   | 0.11879921 | 0.47871065 |
| sp Q96RU3-3 FNBP1_HUMAN | 0.11950207 | 0          |
| sp Q15691 MARE1_HUMAN   | 0.11964798 | 0          |
| sp Q99714 HCD2_HUMAN    | 0.1196785  | 0.16702904 |
| sp Q9Y224 RTRAF_HUMAN   | 0.11976051 | 0.48520416 |
| sp P49755 TMEDA_HUMAN   | 0.11987495 | 0          |
| sp Q9Y2Q3-3 GSTK1_HUMAN | 0.11991692 | 0          |
| sp P35612-2 ADDB_HUMAN  | 0.12085724 | 0          |
| sp Q9UJW0-3 DCTN4_HUMAN | 0.12145424 | 0          |
| sp Q9Y277-2 VDAC3_HUMAN | 0.12161255 | 0.09339783 |
| sp Q06323 PSME1_HUMAN   | 0.12192917 | 0.3005443  |
| sp O14787-2 TNPO2_HUMAN | 0.12201309 | 0          |
| sp P84090 ERH_HUMAN     | 0.12206459 | 0          |
| sp Q92900-2 RENT1_HUMAN | 0.12231445 | 0          |
| sp Q13838-2 DX39B_HUMAN | 0.12234116 | 0          |
| sp O14964-2 HGS_HUMAN   | 0.12244034 | 0          |

|                         |            |            |
|-------------------------|------------|------------|
| sp O43776 SYNC_HUMAN    | 0.12399864 | 0          |
| sp P50395 GDIB_HUMAN    | 0.12454796 | 0.11403357 |
| sp P35611-2 ADDA_HUMAN  | 0.12461281 | 0.02662771 |
| sp Q9UBB4-2 ATX10_HUMAN | 0.12462616 | 0          |
| sp Q14764 MVP_HUMAN     | 0.12462807 | 0.1746542  |
| sp P62906 RL10A_HUMAN   | 0.12513542 | 0.03367973 |
| sp Q9NSD9 SYFB_HUMAN    | 0.12550354 | 0          |
| sp Q08257 QOR_HUMAN     | 0.12612152 | 0.12054814 |
| sp Q92888-2 ARHG1_HUMAN | 0.1264019  | 0.35795313 |
| sp P39019 RS19_HUMAN    | 0.12644577 | 0.2178309  |
| sp Q7L1Q6-2 BZW1_HUMAN  | 0.126791   | 0          |
| sp Q15149-9 PLEC_HUMAN  | 0.12710953 | 0          |
| sp P04406 G3P_HUMAN     | 0.12740326 | 0.00508175 |
| sp P22102 PUR2_HUMAN    | 0.12744522 | 0.30372584 |
| sp Q709C8-2 VP13C_HUMAN | 0.12767315 | 0          |
| sp Q14204 DYHC1_HUMAN   | 0.12778854 | 0.21807808 |
| sp Q6XQN6 PNCB_HUMAN    | 0.12788773 | 0.17077933 |
| sp Q9H9B4 SFXN1_HUMAN   | 0.12808228 | 0          |
| sp P00491 PNPH_HUMAN    | 0.12810516 | 0.17511293 |
| sp P50452 SPB8_HUMAN    | 0.12842941 | 0          |
| sp P14618-3 KPYM_HUMAN  | 0.1285286  | 0          |
| sp Q14240-2 IF4A2_HUMAN | 0.12876129 | 0.40256184 |
| sp P43243 MATR3_HUMAN   | 0.12906456 | 0.37060758 |
| sp P48735 IDHP_HUMAN    | 0.130167   | 0.01551361 |
| sp P48147 PPCE_HUMAN    | 0.13035583 | 0          |
| sp P12110 CO6A2_HUMAN   | 0.1312561  | 0.64348376 |
| sp Q9H9G7-2 AGO3_HUMAN  | 0.1313324  | 0.45033538 |
| sp P23284 PIIB_HUMAN    | 0.13142395 | 0.6255959  |
| sp P62495-2 ERF1_HUMAN  | 0.13161278 | 0          |
| sp Q15019-2 SEPT2_HUMAN | 0.13185501 | 0.0315703  |
| sp Q9HD89 RETN_HUMAN    | 0.13196373 | 0.19149946 |
| sp P55786 PSA_HUMAN     | 0.13228226 | 0.04950076 |
| sp Q96RQ3 MCCA_HUMAN    | 0.13260269 | 0          |
| sp Q9Y6W5 WASF2_HUMAN   | 0.1327591  | 0.09339783 |
| sp Q5K4L6-2 S27A3_HUMAN | 0.1336937  | 0          |
| sp Q9BT78 CSN4_HUMAN    | 0.13414001 | 0          |
| sp Q06787-10 FMR1_HUMAN | 0.13447762 | 0          |
| sp Q15102 PA1B3_HUMAN   | 0.13451767 | 0.45563722 |
| sp Q8TBC4 UBA3_HUMAN    | 0.13464165 | 0          |
| sp Q9H3N1 TMX1_HUMAN    | 0.13529205 | 0.09894868 |
| sp P53602 MVD1_HUMAN    | 0.13576698 | 0          |
| sp Q13045-3 FLII_HUMAN  | 0.13578033 | 0          |
| sp O60610-2 DIAP1_HUMAN | 0.13582802 | 0.29066643 |
| sp P26196 DDX6_HUMAN    | 0.13583755 | 0          |
| sp Q9Y6C2 EMIL1_HUMAN   | 0.13645744 | 0.54687065 |

|                         |            |            |
|-------------------------|------------|------------|
| sp Q8NHP8 PLBL2_HUMAN   | 0.13647842 | 0          |
| sp P10644 KAPO_HUMAN    | 0.1366005  | 0.09339783 |
| sp P10768 ESTD_HUMAN    | 0.13720894 | 0          |
| sp Q08379 GOGA2_HUMAN   | 0.13800812 | 0          |
| sp Q96AE4-2 FUBP1_HUMAN | 0.1387024  | 0.5032694  |
| sp P04275 VWF_HUMAN     | 0.13884735 | 0.02921007 |
| sp P63027 VAMP2_HUMAN   | 0.1397152  | 0          |
| sp P30153 2AAA_HUMAN    | 0.13983154 | 0.02333495 |
| sp P00338 LDHA_HUMAN    | 0.13991928 | 0          |
| sp P19971 TYPH_HUMAN    | 0.13994217 | 1.1323998  |
| sp P43307 SSRA_HUMAN    | 0.1401329  | 0.7827403  |
| sp Q8WXF1 PSPC1_HUMAN   | 0.14052963 | 0          |
| sp O00233-2 PSMD9_HUMAN | 0.14076805 | 0          |
| sp P53041 PPP5_HUMAN    | 0.14076996 | 0          |
| sp O43837 IDH3B_HUMAN   | 0.14077759 | 0.2178309  |
| sp P13716-2 HEM2_HUMAN  | 0.14160919 | 0.02662771 |
| sp Q9HCB6 SPON1_HUMAN   | 0.1418953  | 0.04687595 |
| sp P02549-2 SPTA1_HUMAN | 0.14203072 | 1.2435468  |
| sp O15173-2 PGRC2_HUMAN | 0.14232826 | 0.09750395 |
| sp Q9Y2A7-2 NCKP1_HUMAN | 0.14236069 | 0          |
| sp Q9Y4G6 TLN2_HUMAN    | 0.14330578 | 0.19149946 |
| sp Q13409-2 DC112_HUMAN | 0.14404869 | 0.03367973 |
| sp Q8NBJ5 GT251_HUMAN   | 0.1442833  | 0.28516325 |
| sp P09619 PGFRB_HUMAN   | 0.14434814 | 0.1342476  |
| sp P40306 PSB10_HUMAN   | 0.14477158 | 0.5204253  |
| sp Q93052 LPP_HUMAN     | 0.14510536 | 0.29301754 |
| sp P43686 PRS6B_HUMAN   | 0.14520264 | 0          |
| sp O15382 BCAT2_HUMAN   | 0.14529991 | 0.30372584 |
| sp P11766 ADHX_HUMAN    | 0.14594269 | 0.25398457 |
| sp P12268 IMDH2_HUMAN   | 0.14605713 | 0.26737198 |
| sp O75874 IDHC_HUMAN    | 0.1462059  | 0.16293353 |
| sp P47756-2 CAPZB_HUMAN | 0.14623833 | 0.31786543 |
| sp P62195 PRS8_HUMAN    | 0.14627266 | 0          |
| sp Q13098-5 CSN1_HUMAN  | 0.14645004 | 0          |
| sp O94826 TOM70_HUMAN   | 0.14679718 | 0.11949348 |
| sp P48444 COPD_HUMAN    | 0.14711761 | 0.22784016 |
| sp Q9UEY8 ADDG_HUMAN    | 0.14720154 | 0.0846519  |
| sp Q8WUM4 PDC6I_HUMAN   | 0.14736557 | 0.07588609 |
| sp P11586 C1TC_HUMAN    | 0.14741898 | 0.02662771 |
| sp P11166 GTR1_HUMAN    | 0.14767838 | 0          |
| sp P40261 NNMT_HUMAN    | 0.14795685 | 0.19149946 |
| sp P10155-3 RO60_HUMAN  | 0.1481018  | 0.633381   |
| sp Q16851-2 UGPA_HUMAN  | 0.14813614 | 0          |
| sp Q12905 ILF2_HUMAN    | 0.14822578 | 0.11920157 |
| sp P31948 STIP1_HUMAN   | 0.14896965 | 0.13745423 |

|                         |            |            |
|-------------------------|------------|------------|
| sp Q9P2R7-2 SUCB1_HUMAN | 0.14929199 | 0.26546443 |
| sp Q92890-1 UFD1_HUMAN  | 0.14958191 | 0.19149946 |
| sp P24666-2 PPAC_HUMAN  | 0.14968014 | 0.09894868 |
| sp P48163 MAOX_HUMAN    | 0.14998817 | 0.19410844 |
| sp P28161 GSTM2_HUMAN   | 0.15043068 | 0.7827403  |
| sp Q8IU7 AEBP1_HUMAN    | 0.15058136 | 0          |
| sp P22897 MRC1_HUMAN    | 0.15070724 | 0.91458976 |
| sp P27348 1433T_HUMAN   | 0.15093994 | 0          |
| sp P61081 UBC12_HUMAN   | 0.15109825 | 0          |
| sp P31943 HNRH1_HUMAN   | 0.15121078 | 0          |
| sp P24534 EF1B_HUMAN    | 0.15185356 | 0.35795313 |
| sp P17987 TCPA_HUMAN    | 0.15195465 | 0.05473607 |
| sp P22059 OSBP1_HUMAN   | 0.15225983 | 0          |
| sp Q9UBG0 MRC2_HUMAN    | 0.15250015 | 0.2591514  |
| sp Q15233 NONO_HUMAN    | 0.15251541 | 0.29301754 |
| sp Q96CW1-2 AP2M1_HUMAN | 0.15259743 | 0          |
| sp Q9NY33 DPP3_HUMAN    | 0.15279388 | 0.3188726  |
| sp P11177-3 ODPB_HUMAN  | 0.15342712 | 0          |
| sp P04424-2 ARLY_HUMAN  | 0.15388107 | 0.09339783 |
| sp P49458 SRP09_HUMAN   | 0.1539917  | 0          |
| sp P50990 TCPQ_HUMAN    | 0.15492249 | 0.2524271  |
| sp P55083-2 MFAP4_HUMAN | 0.15528679 | 0.19149946 |
| sp Q99497 PARK7_HUMAN   | 0.15587616 | 0.14672586 |
| sp Q96M27-3 PRRC1_HUMAN | 0.15600586 | 0.19149946 |
| sp O00299 CLIC1_HUMAN   | 0.15637779 | 0.01700861 |
| sp O14818 PSA7_HUMAN    | 0.15765762 | 0          |
| sp P29590 PML_HUMAN     | 0.15786934 | 0.051214   |
| sp P24557-2 THAS_HUMAN  | 0.15789413 | 0          |
| sp Q96A33-2 CCD47_HUMAN | 0.1581707  | 0          |
| sp P08559-2 ODPA_HUMAN  | 0.15849113 | 0          |
| sp Q6DD88 ATLA3_HUMAN   | 0.1595459  | 0          |
| sp Q86VS8 HOOK3_HUMAN   | 0.15970421 | 0          |
| sp Q9NVA2 SEP11_HUMAN   | 0.1598053  | 0.1791607  |
| sp Q9BUQ8 DDX23_HUMAN   | 0.15992355 | 0          |
| sp P23229-4 ITA6_HUMAN  | 0.15995598 | 0          |
| sp Q07955-2 SRSF1_HUMAN | 0.16004562 | 1.1932943  |
| sp P49961 ENTP1_HUMAN   | 0.16033936 | 0          |
| sp P05783 K1C18_HUMAN   | 0.16143608 | 0.23826522 |
| sp Q14152-2 EIF3A_HUMAN | 0.16150475 | 0.26546443 |
| sp Q92945 FUBP2_HUMAN   | 0.16151619 | 0.63371044 |
| sp P41091 IF2G_HUMAN    | 0.16210938 | 0          |
| sp Q9Y2B0 CNPY2_HUMAN   | 0.1631813  | 0          |
| sp Q16181-2 SEPT7_HUMAN | 0.16361237 | 0.01700861 |
| sp P31930 QCR1_HUMAN    | 0.16381836 | 0.10138063 |
| sp O95336 6PGL_HUMAN    | 0.16398239 | 0.14927356 |

|                         |            |            |
|-------------------------|------------|------------|
| sp Q71U36-2 TBA1A_HUMAN | 0.16408348 | 0          |
| sp P09496-2 CLCA_HUMAN  | 0.1643467  | 0          |
| sp O43747-2 AP1G1_HUMAN | 0.16435242 | 0          |
| sp Q2TAY7 SMU1_HUMAN    | 0.1644764  | 0          |
| sp Q9BZZ5-3 API5_HUMAN  | 0.1645298  | 0.23541966 |
| sp P30520 PURA2_HUMAN   | 0.16458893 | 0          |
| sp Q9NZU5 LMCD1_HUMAN   | 0.16489029 | 0.22032139 |
| sp O60884 DNJA2_HUMAN   | 0.16568375 | 0          |
| sp O14974-3 MYPT1_HUMAN | 0.16607857 | 0.34323573 |
| sp P40227 TCPZ_HUMAN    | 0.16646957 | 0.3563347  |
| sp Q8TDZ2-4 MICA1_HUMAN | 0.16662979 | 0          |
| sp P00558 PGK1_HUMAN    | 0.16675949 | 0.10770471 |
| sp P33176 KINH_HUMAN    | 0.16731834 | 0.79939914 |
| sp P53396-2 ACLY_HUMAN  | 0.1677227  | 0.00764478 |
| sp P35270 SPRE_HUMAN    | 0.16773129 | 0.30372584 |
| sp P55735 SEC13_HUMAN   | 0.16778374 | 0.35795313 |
| sp Q08211 DHX9_HUMAN    | 0.16790771 | 0.46284658 |
| sp P52272-2 HNRPM_HUMAN | 0.16797829 | 0.52929556 |
| sp P22033 MUTA_HUMAN    | 0.16858482 | 0          |
| sp O60879-2 DIAP2_HUMAN | 0.16873169 | 0          |
| sp P18085 ARF4_HUMAN    | 0.16873169 | 0          |
| sp P29350-4 PTN6_HUMAN  | 0.16886139 | 0.37061578 |
| sp P29466-2 CASP1_HUMAN | 0.16899681 | 0.5204253  |
| sp Q15029-2 U5S1_HUMAN  | 0.16939926 | 0.4584066  |
| sp O00487 PSDE_HUMAN    | 0.16942406 | 0          |
| sp Q16401-2 PSMD5_HUMAN | 0.16947937 | 0          |
| sp O43681 ASNA_HUMAN    | 0.17002869 | 0          |
| sp P05387 RLA2_HUMAN    | 0.17012215 | 0          |
| sp P20073-2 ANXA7_HUMAN | 0.17082977 | 0.76289684 |
| sp O14617-4 AP3D1_HUMAN | 0.1708641  | 0          |
| sp P49902-2 5NTC_HUMAN  | 0.17142487 | 0          |
| sp P08294 SODE_HUMAN    | 0.1721878  | 0          |
| sp Q68EM7-2 RHG17_HUMAN | 0.17220592 | 0.19149946 |
| sp P50454 SERPH_HUMAN   | 0.17228317 | 0.02662771 |
| sp P21333-2 FLNA_HUMAN  | 0.17266464 | 0.53565615 |
| sp P62750 RL23A_HUMAN   | 0.17352295 | 0          |
| sp Q9Y2S2 CRYL1_HUMAN   | 0.17484283 | 0.30372584 |
| sp P00746 CFAD_HUMAN    | 0.17489052 | 0          |
| sp P54725-2 RD23A_HUMAN | 0.17518234 | 0.45033538 |
| sp Q96I15 SCLY_HUMAN    | 0.17591286 | 0.45033538 |
| sp P11940-2 PABP1_HUMAN | 0.17591667 | 0          |
| sp P09417 DHPR_HUMAN    | 0.17593002 | 0          |
| sp O43294 TGFI1_HUMAN   | 0.17602539 | 0          |
| sp Q9Y3A5 SBDS_HUMAN    | 0.17613411 | 0.06291623 |
| sp Q13547 HDAC1_HUMAN   | 0.17650223 | 0          |

|                          |            |            |
|--------------------------|------------|------------|
| sp Q15257-2 PTPA_HUMAN   | 0.17729378 | 0          |
| sp P11217-2 PYGM_HUMAN   | 0.177845   | 0          |
| sp P32456 GBP2_HUMAN     | 0.17787361 | 0          |
| sp Q9UL46 PSME2_HUMAN    | 0.17835426 | 0.68888646 |
| sp P08133 ANXA6_HUMAN    | 0.17867279 | 0.07278968 |
| sp P00352 AL1A1_HUMAN    | 0.1786747  | 0.00443329 |
| sp O94811 TPPP_HUMAN     | 0.17873764 | 0          |
| sp Q9NQR4 NIT2_HUMAN     | 0.17885971 | 0          |
| sp Q9Y2X3 NOP58_HUMAN    | 0.17908859 | 0.45033538 |
| sp Q7Z3D6-3 GLUCM_HUMAN  | 0.17970276 | 0          |
| sp P14317 HCLS1_HUMAN    | 0.17977142 | 0          |
| sp Q12931-2 TRAP1_HUMAN  | 0.17979813 | 0          |
| sp Q8WUP2-3 FBLI1_HUMAN  | 0.18039703 | 0          |
| sp P68366-2 TBA4A_HUMAN  | 0.18054199 | 0          |
| sp Q9P2X0-2 DPM3_HUMAN   | 0.18130302 | 0          |
| sp Q9UKG1 DP13A_HUMAN    | 0.18146706 | 0.28516325 |
| sp Q9P2T1-2 GMPR2_HUMAN  | 0.18171501 | 0.09894868 |
| sp Q14914-2 PTGR1_HUMAN  | 0.18198395 | 0          |
| sp Q08945 SSRP1_HUMAN    | 0.18230629 | 0.84879977 |
| sp Q969X5 ERGI1_HUMAN    | 0.18241882 | 0          |
| sp P23526 SAHH_HUMAN     | 0.18295097 | 0.00934436 |
| sp O94973-2 AP2A2_HUMAN  | 0.18310928 | 0.53506804 |
| sp Q05655-2 KPCD_HUMAN   | 0.18321228 | 0.28516325 |
| sp P33316 DUT_HUMAN      | 0.18376923 | 0.19149946 |
| sp P21912 SDHB_HUMAN     | 0.18379593 | 0          |
| sp P04075 ALDOA_HUMAN    | 0.18391418 | 0.31106147 |
| sp Q13557-10 KCC2D_HUMAN | 0.18395805 | 0.3630891  |
| sp P11171-2 41_HUMAN     | 0.1844368  | 0          |
| sp P26641 EF1G_HUMAN     | 0.18451881 | 0.2824735  |
| sp P15121 ALDR_HUMAN     | 0.1846199  | 0          |
| sp P07384 CAN1_HUMAN     | 0.18479347 | 0.02261831 |
| sp P30101 PDIA3_HUMAN    | 0.18501282 | 0.6730828  |
| sp P27797 CALR_HUMAN     | 0.18621445 | 0.8244277  |
| sp Q96P70 IPO9_HUMAN     | 0.18668556 | 0.19149946 |
| sp P30044 PRDX5_HUMAN    | 0.18727875 | 0.09476809 |
| sp Q13425 SNTB2_HUMAN    | 0.18793488 | 0          |
| sp P34896-2 GLYC_HUMAN   | 0.18807602 | 0.21439649 |
| sp O00303 EIF3F_HUMAN    | 0.18844414 | 0.35193655 |
| sp P30626-2 SORCN_HUMAN  | 0.18855286 | 0          |
| sp O75340-2 PDCD6_HUMAN  | 0.1885624  | 0          |
| sp Q06124-2 PTN11_HUMAN  | 0.18870735 | 0          |
| sp P55265-5 DSRAD_HUMAN  | 0.18986893 | 0.45033538 |
| sp P40939 ECHA_HUMAN     | 0.19029427 | 0.33566394 |
| sp Q7L2H7 EIF3M_HUMAN    | 0.1903801  | 0          |
| sp Q13243-3 SRSF5_HUMAN  | 0.191082   | 0.19149946 |

|                         |            |            |
|-------------------------|------------|------------|
| sp P40925-2 MDHC_HUMAN  | 0.19128609 | 0.06210651 |
| sp Q9BUJ2-4 HNRL1_HUMAN | 0.19139099 | 0.24097534 |
| sp P51911 CNN1_HUMAN    | 0.1913948  | 0.22362706 |
| sp Q16531 DDB1_HUMAN    | 0.1919117  | 0.2711284  |
| sp Q02790 FKBP4_HUMAN   | 0.19206238 | 0.09339783 |
| sp P13798 ACPH_HUMAN    | 0.1920929  | 0.3188726  |
| sp P22234-2 PUR6_HUMAN  | 0.19211578 | 0          |
| sp P30419-2 NMT1_HUMAN  | 0.19263458 | 0          |
| sp Q6NVY1 HIBCH_HUMAN   | 0.19263458 | 0.1342476  |
| sp O43390-2 HNRPR_HUMAN | 0.1926403  | 0.21133235 |
| sp Q9NUV9 GIMA4_HUMAN   | 0.19271088 | 0          |
| sp P12270 TPR_HUMAN     | 0.19298172 | 0.01819076 |
| sp P52597 HNRPF_HUMAN   | 0.19428253 | 0.20467198 |
| sp P42226 STAT6_HUMAN   | 0.19448662 | 0          |
| sp Q15393 SF3B3_HUMAN   | 0.19503975 | 0.19484499 |
| sp P62304 RUXE_HUMAN    | 0.1950512  | 0          |
| sp Q16539-2 MK14_HUMAN  | 0.19543457 | 0.28516325 |
| sp P30566 PUR8_HUMAN    | 0.19545174 | 0.2178309  |
| sp P05388-2 RLA0_HUMAN  | 0.1964798  | 0.14927356 |
| sp P29692 EF1D_HUMAN    | 0.19672966 | 0          |
| sp P31153 METK2_HUMAN   | 0.19674683 | 0          |
| sp P67775-2 PP2AA_HUMAN | 0.19763374 | 0          |
| sp Q1KMD3 HNRL2_HUMAN   | 0.19768906 | 0.23542999 |
| sp P27824-2 CALX_HUMAN  | 0.19798279 | 0.62912476 |
| sp Q13976 KGP1_HUMAN    | 0.19871521 | 0.06986027 |
| sp P48059-3 LIMS1_HUMAN | 0.19976044 | 0.1342476  |
| sp Q15075 EEA1_HUMAN    | 0.19983101 | 0.6287559  |
| sp P05455 LA_HUMAN      | 0.20001984 | 0.41804093 |
| sp Q15642-3 CIP4_HUMAN  | 0.20054436 | 0          |
| sp P09104-2 ENOG_HUMAN  | 0.2006836  | 0          |
| sp P51571 SSRD_HUMAN    | 0.20080948 | 0.09894868 |
| sp Q96KP4 CNDP2_HUMAN   | 0.20158195 | 0.32334426 |
| sp O15260-2 SURF4_HUMAN | 0.20162201 | 0.19149946 |
| sp P30085 KCY_HUMAN     | 0.20166779 | 0.09894868 |
| sp Q13263 TIF1B_HUMAN   | 0.20228958 | 0.4490988  |
| sp Q15717 ELAV1_HUMAN   | 0.20274925 | 0.28516325 |
| sp P02795 MT2_HUMAN     | 0.20489883 | 0.45033538 |
| sp O75688 PPM1B_HUMAN   | 0.2051239  | 0          |
| sp P50991 TCPD_HUMAN    | 0.205904   | 0          |
| sp O43242 PSMD3_HUMAN   | 0.20652199 | 0.16702904 |
| sp Q9NRX4 PHP14_HUMAN   | 0.20680618 | 0.28516325 |
| sp Q9NQG5 RPR1B_HUMAN   | 0.20775318 | 0.35795313 |
| sp Q7Z4H8 PLGT3_HUMAN   | 0.20808792 | 0.30372584 |
| sp O60749-2 SNX2_HUMAN  | 0.20819473 | 0.10943281 |
| sp P18077 RL35A_HUMAN   | 0.20835686 | 0.45033538 |

|                         |            |            |
|-------------------------|------------|------------|
| sp P45974-2 UBP5_HUMAN  | 0.2086525  | 0.45546502 |
| sp Q10713-2 MPPA_HUMAN  | 0.20888329 | 0          |
| sp Q8NFW8 NEUA_HUMAN    | 0.20949936 | 0          |
| sp Q9H3U1-2 UN45A_HUMAN | 0.2098217  | 0          |
| sp P54727 RD23B_HUMAN   | 0.21026802 | 0.30372584 |
| sp O60701 UGDH_HUMAN    | 0.21157646 | 0.42759705 |
| sp Q9P258 RCC2_HUMAN    | 0.21190262 | 0.26737198 |
| sp P62140 PP1B_HUMAN    | 0.21201324 | 0          |
| sp Q9NSE4 SYIM_HUMAN    | 0.2128315  | 0.38551986 |
| sp Q9NZ08-2 ERAP1_HUMAN | 0.21288872 | 0.3852666  |
| sp P14618-2 KPYM_HUMAN  | 0.21300888 | 0.34323573 |
| sp Q9H4A4 AMPB_HUMAN    | 0.21303558 | 0.12561582 |
| sp Q92734-2 TFG_HUMAN   | 0.21315765 | 0          |
| sp Q9BY32 ITPA_HUMAN    | 0.2133131  | 0.69308156 |
| sp O43143 DHX15_HUMAN   | 0.21375656 | 0.2207585  |
| sp P62269 RS18_HUMAN    | 0.21443176 | 1.1276597  |
| sp P50914 RL14_HUMAN    | 0.21491623 | 0          |
| sp Q13618-2 CUL3_HUMAN  | 0.2151928  | 0.26546443 |
| sp P63151-2 2ABA_HUMAN  | 0.21600533 | 0          |
| sp O95782-2 AP2A1_HUMAN | 0.21647263 | 0.7022581  |
| sp O75964 ATP5L_HUMAN   | 0.21719933 | 0.19149946 |
| sp P50579-2 MAP2_HUMAN  | 0.21724701 | 0.35795313 |
| sp P13639 EF2_HUMAN     | 0.21741104 | 0.8487422  |
| sp P49065 ALBU_RABIT    | 0.21774101 | 0.656254   |
| sp Q9H8H3 MET7A_HUMAN   | 0.21783638 | 0          |
| sp P12277 KCRB_HUMAN    | 0.21800613 | 0.41804093 |
| sp P12931-2 SRC_HUMAN   | 0.21819305 | 0          |
| sp Q00013-2 EM55_HUMAN  | 0.21881676 | 0          |
| sp Q5JTV8-3 TOIP1_HUMAN | 0.21926498 | 0.06291623 |
| sp Q14558-2 KPRA_HUMAN  | 0.21953964 | 0.656254   |
| sp P17858-2 PFKAL_HUMAN | 0.219553   | 0.08307569 |
| sp Q9UNM6-2 PSD13_HUMAN | 0.21985245 | 0.04454162 |
| sp O75534-2 CSDE1_HUMAN | 0.22018623 | 0.28516325 |
| sp Q8TD19 NEK9_HUMAN    | 0.22083664 | 0.19149946 |
| sp B5ME19 EIFCL_HUMAN   | 0.22174263 | 0.29934928 |
| sp Q92747 ARC1A_HUMAN   | 0.22278404 | 0          |
| sp P12956 XRCC6_HUMAN   | 0.222826   | 0.22948365 |
| sp Q8N163-2 CCAR2_HUMAN | 0.22332    | 0.06291623 |
| sp P00736 C1R_HUMAN     | 0.2236824  | 0.19149946 |
| sp O60664-4 PLIN3_HUMAN | 0.22424126 | 0.10861364 |
| sp P04350 TBB4A_HUMAN   | 0.2245121  | 0          |
| sp Q99873-2 ANM1_HUMAN  | 0.22496223 | 0.30372584 |
| sp Q9UH65 SWP70_HUMAN   | 0.22536659 | 0          |
| sp P09972 ALDOC_HUMAN   | 0.2254467  | 0.3630891  |
| sp Q9UQ16-2 DYN3_HUMAN  | 0.22607136 | 0          |



|                         |            |            |
|-------------------------|------------|------------|
| sp Q9BVC6 TM109_HUMAN   | 0.22655487 | 0.35795313 |
| sp P69891 HBG1_HUMAN    | 0.22709656 | 1.0634323  |
| sp P47897 SYQ_HUMAN     | 0.22750664 | 0          |
| sp Q92688-2 AN32B_HUMAN | 0.22795677 | 0          |
| sp P55809 SCOT1_HUMAN   | 0.22814369 | 0          |
| sp P27695 APEX1_HUMAN   | 0.22825241 | 0.30372584 |
| sp P48960-2 CD97_HUMAN  | 0.22896004 | 0          |
| sp Q93009-3 UBP7_HUMAN  | 0.22908592 | 0.04454162 |
| sp Q86VP6 CAND1_HUMAN   | 0.22944832 | 0.5204253  |
| sp P01009 A1AT_HUMAN    | 0.2296009  | 0.6948127  |
| sp O00571-2 DDX3X_HUMAN | 0.22968292 | 0          |
| sp Q8WVM8 SCFD1_HUMAN   | 0.23050499 | 0.21439649 |
| sp P24821-4 TENA_HUMAN  | 0.23088837 | 0.3985966  |
| sp Q12797-10 ASPH_HUMAN | 0.23137093 | 0.23541966 |
| sp P31040 SDHA_HUMAN    | 0.23169327 | 0.5004855  |
| sp P0CG39 POTEJ_HUMAN   | 0.23171997 | 0          |
| sp P21399 ACOC_HUMAN    | 0.23277283 | 0.26737198 |
| sp O75746-2 CMC1_HUMAN  | 0.23308563 | 0.5111962  |
| sp O14828-2 SCAM3_HUMAN | 0.23425293 | 0          |
| sp P53990-2 IST1_HUMAN  | 0.23501778 | 0          |
| sp Q9Y3I0 RTCB_HUMAN    | 0.23587036 | 0.42646354 |
| sp Q12805-2 FBLN3_HUMAN | 0.23622894 | 1.2773042  |
| sp P53618 COPB_HUMAN    | 0.23713684 | 0.5834694  |
| sp O00410 IPO5_HUMAN    | 0.23731613 | 0.7957244  |
| sp P50995-2 ANX11_HUMAN | 0.23804855 | 0.3761346  |
| sp P62277 RS13_HUMAN    | 0.23821831 | 0          |
| sp P78371 TCPB_HUMAN    | 0.23830986 | 0.4053777  |
| sp P32455 GBP1_HUMAN    | 0.23971176 | 0.1897449  |
| sp P11142 HSP7C_HUMAN   | 0.23977661 | 0.25004795 |
| sp Q92552-2 RT27_HUMAN  | 0.2398901  | 0.45033538 |
| sp Q9BTV4 TMM43_HUMAN   | 0.24052238 | 0.84879977 |
| sp P49721 PSB2_HUMAN    | 0.24056435 | 0.656254   |
| sp Q9Y678 COPG1_HUMAN   | 0.24083138 | 0.53821    |
| sp P62736 ACTA_HUMAN    | 0.24247551 | 0.2823809  |
| sp P13646-3 K1C13_HUMAN | 0.24306488 | 0.44572112 |
| sp P49189 AL9A1_HUMAN   | 0.24346352 | 0.00764478 |
| sp Q6P2Q9 PRP8_HUMAN    | 0.24346542 | 0.316588   |
| sp Q96S97 MYADM_HUMAN   | 0.24379349 | 0          |
| sp P08754 GNAI3_HUMAN   | 0.24407196 | 0          |
| sp P13010 XRCC5_HUMAN   | 0.24528503 | 0.47446895 |
| sp Q9H2G2-2 SLK_HUMAN   | 0.24547005 | 0          |
| sp P31150 GDIA_HUMAN    | 0.24604797 | 0.01551361 |
| sp P28062-2 PSB8_HUMAN  | 0.24656868 | 0.30372584 |
| sp P08708 RS17_HUMAN    | 0.24667168 | 0.06291623 |
| sp P58107 EPIPL_HUMAN   | 0.2474289  | 0.7622591  |

|                          |            |            |
|--------------------------|------------|------------|
| sp P35637-2 FUS_HUMAN    | 0.24816895 | 0.45033538 |
| sp Q13200 PSMD2_HUMAN    | 0.2481842  | 0          |
| sp P00441 SODC_HUMAN     | 0.24861526 | 0.20467198 |
| sp P63244 RACK1_HUMAN    | 0.2487297  | 0          |
| sp Q02952-2 AKA12_HUMAN  | 0.24904251 | 0.19149946 |
| sp Q8IU2-2 RB6I2_HUMAN   | 0.2493515  | 0          |
| sp Q07960 RHG01_HUMAN    | 0.24938583 | 0.47871065 |
| sp Q16891-2 MIC60_HUMAN  | 0.24964142 | 0.3005443  |
| sp Q92506 DHB8_HUMAN     | 0.2500782  | 1.1932944  |
| sp Q02543 RL18A_HUMAN    | 0.25014877 | 1.2392054  |
| sp O76003 GLRX3_HUMAN    | 0.25028038 | 0          |
| sp Q9Y570-2 PPME1_HUMAN  | 0.2505169  | 0.6070219  |
| sp O60832-2 DKC1_HUMAN   | 0.25065994 | 0.09894868 |
| sp Q02878 RL6_HUMAN      | 0.25127792 | 0.7827403  |
| sp P35573 GDE_HUMAN      | 0.25155067 | 0.7061832  |
| sp P27338 AOFB_HUMAN     | 0.2517109  | 0.2453838  |
| sp P31939 PUR9_HUMAN     | 0.25193024 | 0.57855076 |
| sp P62917 RL8_HUMAN      | 0.25195312 | 0.70235044 |
| sp Q9Y262 EIF3L_HUMAN    | 0.25200653 | 0.08779849 |
| sp O94979-10 SC31A_HUMAN | 0.25299835 | 0          |
| sp P29144 TPP2_HUMAN     | 0.25335503 | 0.42759705 |
| sp Q92841-1 DDX17_HUMAN  | 0.2537117  | 0.14388667 |
| sp P49915-2 GUAA_HUMAN   | 0.2540512  | 0          |
| sp O94776 MTA2_HUMAN     | 0.2542572  | 0          |
| sp Q14258 TRI25_HUMAN    | 0.25450134 | 0.6634523  |
| sp P02751-15 FINC_HUMAN  | 0.25452614 | 0          |
| sp P08865 RSSA_HUMAN     | 0.25471497 | 0.15980355 |
| sp Q14108-2 SCR2_HUMAN   | 0.25575256 | 0.45033538 |
| sp Q8WXF7-2 ATLA1_HUMAN  | 0.25647736 | 0          |
| sp P52306 GDS1_HUMAN     | 0.25827217 | 0          |
| sp P31689 DNJA1_HUMAN    | 0.25894928 | 0.5204253  |
| sp P49588-2 SYAC_HUMAN   | 0.25924683 | 1.1593928  |
| sp P49411 EFTU_HUMAN     | 0.25951385 | 0.91601294 |
| sp Q15293 RCN1_HUMAN     | 0.26233864 | 0          |
| sp P35268 RL22_HUMAN     | 0.2625122  | 0.21439649 |
| sp P04004 VTNC_HUMAN     | 0.2630558  | 0.95332193 |
| sp O95352 ATG7_HUMAN     | 0.26350212 | 0.19149946 |
| sp P62995-3 TRA2B_HUMAN  | 0.264431   | 1.1932944  |
| sp P22352 GPX3_HUMAN     | 0.26452637 | 0          |
| sp Q13438-4 OS9_HUMAN    | 0.26464272 | 0.7827403  |
| sp Q562R1 ACTBL_HUMAN    | 0.26511002 | 0.2178309  |
| sp P0DMV9 HS71B_HUMAN    | 0.26700974 | 0.46176907 |
| sp P07951 TPM2_HUMAN     | 0.26861572 | 1.071201   |
| sp P00390-2 GSHR_HUMAN   | 0.2686844  | 0          |
| sp O14579 COPE_HUMAN     | 0.26916122 | 0.0846519  |

|                         |            |            |
|-------------------------|------------|------------|
| sp O43852-5 CALU_HUMAN  | 0.2701416  | 0          |
| sp Q15046-2 SYK_HUMAN   | 0.2714405  | 0          |
| sp Q9NYU2-2 UGGG1_HUMAN | 0.27148438 | 1.1419085  |
| sp Q15746-3 MYLK_HUMAN  | 0.2716751  | 1.0552052  |
| sp P20674 COX5A_HUMAN   | 0.27179337 | 0.7827403  |
| sp Q969V3-2 NCLN_HUMAN  | 0.27233124 | 0.40256184 |
| sp P31323 KAP3_HUMAN    | 0.2727127  | 0.45033538 |
| sp O95994 AGR2_HUMAN    | 0.27318764 | 0.09339783 |
| sp P31937 3HIDH_HUMAN   | 0.2732334  | 0          |
| sp Q13363 CTBP1_HUMAN   | 0.2738495  | 0.06291623 |
| sp Q8WXH0-2 SYNE2_HUMAN | 0.27435684 | 0.312067   |
| sp P62857 RS28_HUMAN    | 0.27459335 | 0          |
| sp P08237-3 PFKAM_HUMAN | 0.27486038 | 0.06291623 |
| sp Q969G5 CAVN3_HUMAN   | 0.2754326  | 0.40256184 |
| sp O60831 PRAF2_HUMAN   | 0.27578545 | 0.35795313 |
| sp P61247 RS3A_HUMAN    | 0.27610588 | 1.0634323  |
| sp P14314-2 GLU2B_HUMAN | 0.27657127 | 0          |
| sp Q15274 NADC_HUMAN    | 0.27695465 | 0.5111962  |
| sp P51570-2 GALK1_HUMAN | 0.2773037  | 0          |
| sp Q96AQ6-2 PBIP1_HUMAN | 0.27765656 | 0          |
| sp Q15172-2 2A5A_HUMAN  | 0.27780914 | 0          |
| sp P19404 NDUV2_HUMAN   | 0.27798462 | 0.19149946 |
| sp P46821 MAP1B_HUMAN   | 0.27834702 | 0.19149946 |
| sp P62244 RS15A_HUMAN   | 0.27879333 | 0.45033538 |
| sp Q15631 TSN_HUMAN     | 0.2792778  | 0.40256184 |
| sp O43865 SAHH2_HUMAN   | 0.27943134 | 1.0076748  |
| sp O00151 PDLI1_HUMAN   | 0.27974892 | 0.55270666 |
| sp P23142-4 FBLN1_HUMAN | 0.27979374 | 0          |
| sp P48637 GSHB_HUMAN    | 0.28071213 | 0.5511424  |
| sp Q00610-2 CLH1_HUMAN  | 0.2810135  | 0.7365137  |
| sp P04792 HSPB1_HUMAN   | 0.2815132  | 0.8469722  |
| sp P11678 PERE_HUMAN    | 0.28230095 | 0          |
| sp P40763-2 STAT3_HUMAN | 0.2827587  | 0.5511424  |
| sp Q53EL6-2 PDCD4_HUMAN | 0.28328133 | 0.19149946 |
| sp P34932 HSP74_HUMAN   | 0.28370667 | 0.36969694 |
| sp Q29865 1C18_HUMAN    | 0.28378868 | 0.7061832  |
| sp P50502 F10A1_HUMAN   | 0.28383636 | 1.0634323  |
| sp Q96EM0 T3HPD_HUMAN   | 0.28399277 | 0          |
| sp Q04637-4 IF4G1_HUMAN | 0.28476334 | 0.7588735  |
| sp P0CG38 POT1_HUMAN    | 0.285614   | 0          |
| sp P49368 TCPG_HUMAN    | 0.2860031  | 0.91881096 |
| sp P55060-3 XPO2_HUMAN  | 0.28613663 | 0.70235044 |
| sp Q53GG5-2 PDLI3_HUMAN | 0.28671837 | 0.35795313 |
| sp Q3LXA3 TKFC_HUMAN    | 0.28683853 | 1.1025577  |
| sp Q9HC38-2 GLOD4_HUMAN | 0.28807068 | 0.51870745 |

|                           |            |            |
|---------------------------|------------|------------|
| sp P62249 RS16_HUMAN      | 0.2902546  | 0.7827403  |
| sp P06744 G6PI_HUMAN      | 0.29073906 | 0          |
| sp Q9NWXV4 CZIB_HUMAN     | 0.29211998 | 0          |
| sp P31146 COR1A_HUMAN     | 0.29327393 | 0.49789834 |
| sp P30837 AL1B1_HUMAN     | 0.29371834 | 0.65625405 |
| sp Q13217 DNJC3_HUMAN     | 0.2937851  | 1.1276597  |
| sp Q96FV2-2 SCRN2_HUMAN   | 0.2944317  | 0.45033538 |
| sp Q9Y3B3 TMED7_HUMAN     | 0.2944851  | 0.45033538 |
| sp Q9UHB9-4 SRP68_HUMAN   | 0.2957306  | 0.43633315 |
| sp A0A0C4DH25 KVD20_HUMAN | 0.29577255 | 0          |
| sp Q99733-2 NP1L4_HUMAN   | 0.29583454 | 0.35795313 |
| sp Q9HB07 MYG1_HUMAN      | 0.29623413 | 0.61034113 |
| sp O14980 XPO1_HUMAN      | 0.29625893 | 1.2095301  |
| sp P14174 MIF_HUMAN       | 0.29696655 | 0.35795313 |
| sp Q9Y295 DRG1_HUMAN      | 0.29714012 | 0.19149946 |
| sp Q14974 IMB1_HUMAN      | 0.29805183 | 0.34197828 |
| sp O75489 NDUS3_HUMAN     | 0.29852676 | 0.61034113 |
| sp P16298-2 PP2BB_HUMAN   | 0.29991722 | 0          |
| sp Q99832 TCPH_HUMAN      | 0.30250168 | 0          |
| sp P98095-2 FBLN2_HUMAN   | 0.30307388 | 0.9847622  |
| sp P36873-2 PP1G_HUMAN    | 0.303545   | 0.19149946 |
| sp P14866 HNRPL_HUMAN     | 0.3055172  | 0          |
| sp P31947-2 1433S_HUMAN   | 0.3057289  | 0          |
| sp O15355 PPM1G_HUMAN     | 0.3061123  | 0.35795313 |
| sp Q9BUF5 TBB6_HUMAN      | 0.30717468 | 0          |
| sp P46782 RS5_HUMAN       | 0.30729675 | 0.99478513 |
| sp Q9H008 LHPP_HUMAN      | 0.30768967 | 0.37060758 |
| sp P46777 RL5_HUMAN       | 0.30955124 | 0.37410614 |
| sp Q9GZM7-3 TINAL_HUMAN   | 0.30975342 | 0.45033538 |
| sp O75306-2 NDUS2_HUMAN   | 0.31104088 | 0.7061832  |
| sp Q92629-2 SGCD_HUMAN    | 0.3122902  | 0          |
| sp P05165-2 PCCA_HUMAN    | 0.31305504 | 0.15517515 |
| sp P62081 RS7_HUMAN       | 0.31306076 | 0.5204253  |
| sp Q8TD06 AGR3_HUMAN      | 0.31314468 | 0          |
| sp P12814 ACTN1_HUMAN     | 0.3149929  | 0          |
| sp P46779-2 RL28_HUMAN    | 0.31513214 | 0.7827403  |
| sp Q13347 EIF3I_HUMAN     | 0.31519127 | 0.7061832  |
| sp Q13464 ROCK1_HUMAN     | 0.31635857 | 0          |
| sp Q9NY15 STAB1_HUMAN     | 0.3177986  | 0.7827403  |
| sp P26639-2 SYTC_HUMAN    | 0.31922913 | 0.5283125  |
| sp O00170 AIP_HUMAN       | 0.3196411  | 0.35795313 |
| sp Q92499 DDX1_HUMAN      | 0.320755   | 0.80229825 |
| sp P54578-2 UBP14_HUMAN   | 0.32333755 | 0.19149946 |
| sp P02753 RET4_HUMAN      | 0.32358932 | 0.7827403  |
| sp P56134-3 ATPK_HUMAN    | 0.32423782 | 0          |

|                         |            |            |
|-------------------------|------------|------------|
| sp P62633-3 CNBP_HUMAN  | 0.32574654 | 0.45033538 |
| sp P48426-2 PI42A_HUMAN | 0.3271141  | 0.7827403  |
| sp Q5TFE4 NT5D1_HUMAN   | 0.32800102 | 0          |
| sp Q01813 PFKAP_HUMAN   | 0.3284359  | 1.2607617  |
| sp Q9Y5Z4-2 HEBP2_HUMAN | 0.32896042 | 0.7827403  |
| sp P02760 AMBP_HUMAN    | 0.3293171  | 0.6509351  |
| sp Q5JPE7-2 NOMO2_HUMAN | 0.32949066 | 0.656254   |
| sp Q9NP79 VTA1_HUMAN    | 0.32958794 | 0.45033538 |
| sp P22314-2 UBA1_HUMAN  | 0.33034515 | 1.1102507  |
| sp P25685-2 DNJB1_HUMAN | 0.33055305 | 0.2178309  |
| sp P36269-2 GGT5_HUMAN  | 0.33127022 | 1.0076748  |
| sp Q7Z7G0 TARSH_HUMAN   | 0.33253098 | 0          |
| sp Q9BZQ8 NIBAN_HUMAN   | 0.33382416 | 0          |
| sp Q96G03 PGM2_HUMAN    | 0.33461952 | 0.87291557 |
| sp Q13310-2 PABP4_HUMAN | 0.33524895 | 0          |
| sp P78527 PRKDC_HUMAN   | 0.33714294 | 0.06291623 |
| sp P62829 RL23_HUMAN    | 0.33789444 | 0.91601294 |
| sp Q96JJ3-3 ELMO2_HUMAN | 0.3385849  | 0          |
| sp O95373 IPO7_HUMAN    | 0.3390751  | 0.19149946 |
| sp Q8N5K1 CISD2_HUMAN   | 0.3394699  | 0.7827403  |
| sp P20338 RAB4A_HUMAN   | 0.34140015 | 0.656254   |
| sp P00740-2 FA9_HUMAN   | 0.341465   | 1.0634323  |
| sp P20810-10 ICAL_HUMAN | 0.3430748  | 0.5204253  |
| sp Q9UJZ1-2 STML2_HUMAN | 0.34315586 | 1.1932944  |
| sp Q15185-3 TEBP_HUMAN  | 0.34316254 | 0          |
| sp P46459 NSF_HUMAN     | 0.34316254 | 1.120602   |
| sp P46063 RECQ1_HUMAN   | 0.34387207 | 0.57986265 |
| sp Q15005 SPCS2_HUMAN   | 0.34413147 | 0.7827403  |
| sp Q15661 TRYB1_HUMAN   | 0.34524155 | 0.99757636 |
| sp Q8IUZ5 AT2L2_HUMAN   | 0.34602356 | 0.7827403  |
| sp P18084 ITB5_HUMAN    | 0.3482628  | 1.1505735  |
| sp Q09161 NCBP1_HUMAN   | 0.351614   | 0.7827403  |
| sp P42704 LPPRC_HUMAN   | 0.35178375 | 0.21439649 |
| sp P62266 RS23_HUMAN    | 0.3520584  | 1.1505735  |
| sp Q13435 SF3B2_HUMAN   | 0.35315514 | 0.45033538 |
| sp P19525-2 E2AK2_HUMAN | 0.3538971  | 0          |
| sp P07951-3 TPM2_HUMAN  | 0.35395432 | 0.6298893  |
| sp Q96C86 DCPS_HUMAN    | 0.35472488 | 0.9533461  |
| sp Q14BN4-2 SLMAP_HUMAN | 0.35473633 | 0          |
| sp P23368 MAOM_HUMAN    | 0.35550308 | 0.37060758 |
| sp Q9Y5P6-2 GMPPB_HUMAN | 0.3557663  | 0.47871065 |
| sp Q08209-2 PP2BA_HUMAN | 0.35632706 | 0          |
| sp P62851 RS25_HUMAN    | 0.35944366 | 1.1932944  |
| sp Q9UBT2 SAE2_HUMAN    | 0.3601818  | 0.9533461  |
| sp Q9UHD8-3 SEPT9_HUMAN | 0.36175537 | 0.19149946 |

|                           |            |            |
|---------------------------|------------|------------|
| sp P06396 GELS_HUMAN      | 0.361763   | 0.656254   |
| sp P50135 HNMT_HUMAN      | 0.36283493 | 0          |
| sp Q6UW02 CP20A_HUMAN     | 0.36527252 | 0.7827403  |
| sp Q9Y3Z3 SAMH1_HUMAN     | 0.36686516 | 1.0745447  |
| sp A0A0C4DH31 HV118_HUMAN | 0.3687935  | 0          |
| sp Q9BVK6 TMED9_HUMAN     | 0.3698864  | 1.1932944  |
| sp Q9UBE0 SAE1_HUMAN      | 0.3715353  | 0.8272904  |
| sp Q13496 MTM1_HUMAN      | 0.37345982 | 0.19149946 |
| sp Q04446 GLGB_HUMAN      | 0.37421417 | 0.3852666  |
| sp Q04828 AK1C1_HUMAN     | 0.37528992 | 0.35795313 |
| sp P01591 IGJ_HUMAN       | 0.37645912 | 0.19149946 |
| sp P35813-3 PPM1A_HUMAN   | 0.37686157 | 0.656254   |
| sp P00492 HPRT_HUMAN      | 0.37829018 | 0.5111962  |
| sp O76011 KRT34_HUMAN     | 0.38426018 | 0          |
| sp O95394-3 AGM1_HUMAN    | 0.3846321  | 0          |
| sp Q9BWM7 SFXN3_HUMAN     | 0.38568306 | 0.21439649 |
| sp P50440-3 GATM_HUMAN    | 0.3866005  | 1.1932944  |
| sp P54136 SYRC_HUMAN      | 0.38690186 | 0.18414244 |
| sp P48668 K2C6C_HUMAN     | 0.3878994  | 1.2392054  |
| sp P08236-2 BGLR_HUMAN    | 0.38990402 | 0.7588735  |
| sp P14324 FPPS_HUMAN      | 0.3903885  | 0.19149946 |
| sp Q13630 FCL_HUMAN       | 0.39142227 | 0.7061832  |
| sp P49959-3 MRE11_HUMAN   | 0.3927002  | 0.7827403  |
| sp PODJI8 SAA1_HUMAN      | 0.3928795  | 0          |
| sp O60547-2 GMDS_HUMAN    | 0.39291573 | 1.2095301  |
| sp P60891 PRPS1_HUMAN     | 0.39474106 | 1.1932944  |
| sp P49841-2 GSK3B_HUMAN   | 0.39494514 | 0.6070219  |
| sp P62888 RL30_HUMAN      | 0.3954277  | 0.7827403  |
| sp O95479 G6PE_HUMAN      | 0.39764023 | 0.95332193 |
| sp P15374 UCLH3_HUMAN     | 0.39779663 | 0.45033538 |
| sp P62854 RS26_HUMAN      | 0.40515137 | 1.1932944  |
| sp Q9P0J0-2 NDUAD_HUMAN   | 0.40541267 | 0.45033538 |
| sp P48506 GSH1_HUMAN      | 0.40666008 | 0.7827403  |
| sp O43252 PAPS1_HUMAN     | 0.40681458 | 0.7827403  |
| sp P54886-2 P5CS_HUMAN    | 0.40784454 | 0          |
| sp Q6UW68 TM205_HUMAN     | 0.408741   | 1.1932944  |
| sp P46109 CRKL_HUMAN      | 0.4094982  | 0.5204253  |
| sp Q13885 TBB2A_HUMAN     | 0.40954018 | 0.656254   |
| sp P26640 SYVC_HUMAN      | 0.40983963 | 0.90036625 |
| sp P30043 BLVRB_HUMAN     | 0.40997314 | 0.8983557  |
| sp P31513 FMO3_HUMAN      | 0.41505623 | 0.7827403  |
| sp Q9Y3C8 UFC1_HUMAN      | 0.41950607 | 0.19149946 |
| sp O95816 BAG2_HUMAN      | 0.4224491  | 1.1932944  |
| sp Q8WVV9-5 HNRLH_HUMAN   | 0.42247772 | 0.91601294 |
| sp Q5VW32 BROX_HUMAN      | 0.4275608  | 1.1932944  |

|                           |            |            |
|---------------------------|------------|------------|
| sp Q05682 CALD1_HUMAN     | 0.4298973  | 0.97209185 |
| sp P63279 UBC9_HUMAN      | 0.43180084 | 0          |
| sp P11498 PYC_HUMAN       | 0.43257332 | 0.6070219  |
| sp P61254 RL26_HUMAN      | 0.4333992  | 1.2941489  |
| sp Q06278 AOXA_HUMAN      | 0.4445114  | 1.1932944  |
| sp Q7L576 CYFP1_HUMAN     | 0.4464178  | 0          |
| sp Q92556 ELMO1_HUMAN     | 0.44747925 | 0.7061832  |
| sp P57737-4 CORO7_HUMAN   | 0.44751167 | 1.1932944  |
| sp O43488 ARK72_HUMAN     | 0.45007896 | 0.5692702  |
| sp Q96RF0-2 SNX18_HUMAN   | 0.4574108  | 0.7827403  |
| sp Q96N66-3 MBOA7_HUMAN   | 0.4582367  | 0.45033538 |
| sp Q96DG6 CMBL_HUMAN      | 0.4596176  | 0.6070219  |
| sp P07360 CO8G_HUMAN      | 0.467165   | 1.1932944  |
| sp P46736-3 BRCC3_HUMAN   | 0.4681282  | 0.19149946 |
| sp Q92599-2 SEPT8_HUMAN   | 0.47459412 | 0.6070219  |
| sp Q14194-2 DPYL1_HUMAN   | 0.4849434  | 0.656254   |
| sp P23083 HV102_HUMAN     | 0.48884583 | 0.656254   |
| sp P79483 DRB3_HUMAN      | 0.49033737 | 0          |
| sp P10523 ARRS_HUMAN      | 0.49035835 | 0.656254   |
| sp A0A0C4DH38 HV551_HUMAN | 0.49225616 | 1.1932944  |
| sp O43396 TXNL1_HUMAN     | 0.49342155 | 1.1932944  |
| sp P02765 FETUA_HUMAN     | 0.49550247 | 1.3006523  |
| sp P08842 STS_HUMAN       | 0.49656868 | 0.45033538 |
| sp Q9H3K6-2 BOLA2_HUMAN   | 0.4970131  | 0.656254   |
| sp P07358 CO8B_HUMAN      | 0.4978714  | 1.2095301  |
| sp P05090 APOD_HUMAN      | 0.5016899  | 1.1505735  |
| sp P02746 C1QB_HUMAN      | 0.5036011  | 1.1932944  |
| sp Q13247-3 SRSF6_HUMAN   | 0.51187515 | 1.1932944  |
| sp Q9P265 DIP2B_HUMAN     | 0.51350975 | 0.656254   |
| sp Q8TCS8 PNPT1_HUMAN     | 0.5220642  | 0.6070219  |
| sp Q92878-2 RAD50_HUMAN   | 0.52233696 | 1.1505735  |
| sp O14791-2 APOL1_HUMAN   | 0.52560043 | 1.1932944  |
| sp Q9NZZ2-2 OGFR_HUMAN    | 0.53010654 | 1.1505735  |
| sp A1L0T0 ILVBL_HUMAN     | 0.55163574 | 0.6070219  |
| sp P68371 TBB4B_HUMAN     | 0.5518646  | 0          |
| sp P39023 RL3_HUMAN       | 0.5535717  | 1.1932944  |
| sp Q9BS40 LXN_HUMAN       | 0.5641861  | 1.1505735  |
| sp Q14697 GANAB_HUMAN     | 0.5652733  | 1.1932944  |
| sp O94788-4 AL1A2_HUMAN   | 0.5664654  | 0.656254   |
| sp Q9UNS2 CSN3_HUMAN      | 0.5744152  | 0.656254   |
| sp A1L4H1 SRCRL_HUMAN     | 0.58546066 | 1.1932944  |
| sp P12111-4 CO6A3_HUMAN   | 0.5869484  | 0.656254   |
| sp Q9BU23-3 LMF2_HUMAN    | 0.58914566 | 1.1932944  |
| sp O00560-2 SDCB1_HUMAN   | 0.59214973 | 0.45033538 |
| sp O95050-2 INMT_HUMAN    | 0.5978737  | 1.1932944  |

|                           |            |            |
|---------------------------|------------|------------|
| sp P04066 FUCO_HUMAN      | 0.6091118  | 1.1932944  |
| sp P14207 FOLR2_HUMAN     | 0.6140003  | 1.1932944  |
| sp A0A0B4J1X8 HV343_HUMAN | 0.6163807  | 0.656254   |
| sp P12814-2 ACTN1_HUMAN   | 0.6196747  | 1.1932944  |
| sp P43353-2 AL3B1_HUMAN   | 0.64328575 | 0          |
| sp P0DOX7 IGK_HUMAN       | 0.6444702  | 1.1932944  |
| sp Q8TCJ2 STT3B_HUMAN     | 0.65098286 | 1.1932944  |
| sp O75116 ROCK2_HUMAN     | 0.6530819  | 0.6070219  |
| sp P06310 KV230_HUMAN     | 0.6617775  | 0.656254   |
| sp P55058 PLTP_HUMAN      | 0.6653309  | 0.656254   |
| sp POCOL4 CO4A_HUMAN      | 0.67402077 | 0.45033538 |
| sp Q99538-2 LGMN_HUMAN    | 0.6775875  | 1.1932944  |
| sp P08779 K1C16_HUMAN     | 0.68990517 | 0.656254   |
| sp Q14697-2 GANAB_HUMAN   | 0.6995659  | 0.656254   |
| sp Q3SY69 AL1L2_HUMAN     | 0.70443344 | 1.1932944  |
| sp P01743 HV146_HUMAN     | 0.7168102  | 0.7827403  |
| sp Q08170 SRSF4_HUMAN     | 0.7343111  | 0.656254   |
| sp P31946-2 1433B_HUMAN   | 0.7377186  | 0.656254   |
| sp P30443 1A01_HUMAN      | 0.7401924  | 1.1932944  |
| sp P50238 CRIP1_HUMAN     | 0.76348686 | 1.1932944  |
| sp P02747 C1QC_HUMAN      | 0.76496506 | 1.1932944  |
| sp Q0ZGT2-4 NEXN_HUMAN    | 0.7787266  | 0.656254   |
| sp P01624 KV315_HUMAN     | 0.78562355 | 1.1932944  |
| sp P01782 HV309_HUMAN     | 0.7932701  | 0.656254   |
| sp P02533 K1C14_HUMAN     | 0.7994385  | 0.656254   |
| sp P54577 SYYC_HUMAN      | 0.807806   | 0.35795313 |
| sp P0DOX2 IGA2_HUMAN      | 0.8562794  | 1.1932944  |
| sp P01834 IGKC_HUMAN      | 0.9578514  | 1.1932944  |
| sp P00748 FA12_HUMAN      | 0.9743099  | 0.45033538 |
| sp P48741 HSP77_HUMAN     | 0.9889412  | 0.656254   |
| sp P19012-2 K1C15_HUMAN   | 1.027462   | 0.656254   |
| sp P01780 HV307_HUMAN     | 1.0536861  | 0.656254   |
| sp POCOL5 CO4B_HUMAN      | 1.0536976  | 0.656254   |
| sp PODP03 HV335_HUMAN     | 1.0576782  | 1.1932944  |
| sp P01619 KV320_HUMAN     | 1.1066151  | 0.656254   |
| sp P35542 SAA4_HUMAN      | 1.1087036  | 1.1932944  |
| sp P02461 CO3A1_HUMAN     | 1.2196217  | 1.1932944  |
| sp O94875-11 SRBS2_HUMAN  | 1.3355141  | 0.656254   |
| sp A0A075B6P5 KV228_HUMAN | 1.3551102  | 0.656254   |
| sp Q04695 K1C17_HUMAN     | 1.3604717  | 0.656254   |
