# Supplementary material for: Peptidylarginine deiminase 2 citrullinates MZB1 and promotes the secretion of IgM and IgA
Source: PubMed Central journal article supplement (PMC10716219; doi:10.3389/fimmu.2023.1290585), 2023-11-29
Supplement: DataSheet_5.pdf [file DataSheet_5.pdf]

## Supplemental Table 5: RA-ILD3 vs controls

| Accession #             | Fold Change | p value (-log10) |
|-------------------------|-------------|------------------|
| sp Q15109-10 RAGE_HUMAN | -1.7946758  | 2.1818786        |
| sp P12429 ANXA3_HUMAN   | -1.4201756  | 7.665951         |
| sp P22748 CAH4_HUMAN    | -1.4111576  | 2.6576471        |
| sp O96009 NAPSA_HUMAN   | -1.3504906  | 2.6576471        |
| sp P60903 S10AA_HUMAN   | -1.212883   | 1.6960104        |
| sp Q9NZA1-2 CLIC5_HUMAN | -1.1563549  | 3.5908275        |
| sp P12821-2 ACE_HUMAN   | -1.1470909  | 2.6576471        |
| sp P13686 PPA5_HUMAN    | -1.1128521  | 1.6960104        |
| sp P09668 CATH_HUMAN    | -1.0090942  | 4.051346         |
| sp P59665 DEF1_HUMAN    | -0.9286194  | 2.1818786        |
| sp P26440 IVD_HUMAN     | -0.9248428  | 1.6960104        |
| sp Q01469 FABP5_HUMAN   | -0.8989906  | 4.051346         |
| sp Q10589-2 BST2_HUMAN  | -0.8961144  | 1.6960104        |
| sp P62805 H4_HUMAN      | -0.8817921  | 6.3204336        |
| sp P05362 ICAM1_HUMAN   | -0.880209   | 5.869831         |
| sp P11233 RALA_HUMAN    | -0.8714981  | 2.1818786        |
| sp P51659 DHB4_HUMAN    | -0.8707886  | 12.110734        |
| sp O95810 CAVN2_HUMAN   | -0.8615322  | 3.0251918        |
| sp Q9Y624 JAM1_HUMAN    | -0.8435745  | 2.6576471        |
| sp P31949 S10AB_HUMAN   | -0.8298607  | 2.6576471        |
| sp P21397 AOFA_HUMAN    | -0.8230629  | 4.890839         |
| sp P02792 FRIL_HUMAN    | -0.8212318  | 3.7273152        |
| sp P05164-3 PERM_HUMAN  | -0.8195458  | 10.055915        |
| sp P26447 S10A4_HUMAN   | -0.8189716  | 2.6576471        |
| sp P02743 SAMP_HUMAN    | -0.8025971  | 3.760603         |
| sp P41218 MNDA_HUMAN    | -0.7939835  | 1.9647322        |
| sp P50895 BCAM_HUMAN    | -0.7849693  | 6.7698927        |
| sp P49913 CAMP_HUMAN    | -0.767683   | 1.6960104        |
| sp P00167-2 CYB5_HUMAN  | -0.7625084  | 2.1818786        |
| sp P61626 LYSC_HUMAN    | -0.7623711  | 2.6576471        |
| sp Q8WWI1-5 LMO7_HUMAN  | -0.7521801  | 4.6488075        |
| sp P49407-2 ARRB1_HUMAN | -0.746706   | 2.6576471        |
| sp P05091 ALDH2_HUMAN   | -0.7458096  | 10.844091        |
| sp Q6PIU2-2 NCEH1_HUMAN | -0.7194748  | 3.1266599        |
| sp P01903 DRA_HUMAN     | -0.7106037  | 2.1818786        |
| sp Q96TC7 RMD3_HUMAN    | -0.6974945  | 1.6960104        |
| sp Q08722-2 CD47_HUMAN  | -0.6934414  | 1.6960104        |
| sp P09467 F16P1_HUMAN   | -0.6905098  | 5.180782         |
| sp Q8NF37 PCAT1_HUMAN   | -0.6820755  | 2.3143692        |
| sp Q6NZI2 CAVN1_HUMAN   | -0.6769028  | 6.119484         |
| sp P09110 THIK_HUMAN    | -0.6737862  | 2.1818786        |
| sp Q02318 CP27A_HUMAN   | -0.6718674  | 1.6960104        |
| sp P08311 CATG_HUMAN    | -0.6708489  | 4.051346         |

|                         |            |           |
|-------------------------|------------|-----------|
| sp P09758 TACD2_HUMAN   | -0.6634941 | 2.1818786 |
| sp O43760-2 SNG2_HUMAN  | -0.6594238 | 1.6960104 |
| sp O00159-3 MYO1C_HUMAN | -0.6518765 | 6.113284  |
| sp Q9UGT4 SUSD2_HUMAN   | -0.6466389 | 2.3979244 |
| sp P20160 CAP7_HUMAN    | -0.6432076 | 1.6960104 |
| sp Q07157 ZO1_HUMAN     | -0.6279945 | 4.964395  |
| sp P16284-3 PECA1_HUMAN | -0.6210651 | 6.3098373 |
| sp Q13510-2 ASAH1_HUMAN | -0.6092529 | 6.3204336 |
| sp P18428 LBP_HUMAN     | -0.6047058 | 1.6960104 |
| sp P12111-2 CO6A3_HUMAN | -0.6045895 | 2.8384566 |
| sp P05107 ITB2_HUMAN    | -0.594799  | 4.509013  |
| sp P61106 RAB14_HUMAN   | -0.5914383 | 4.7039127 |
| sp P08473 NEP_HUMAN     | -0.5878916 | 1.6960104 |
| sp Q9UFN0 NPS3A_HUMAN   | -0.5808258 | 1.6960104 |
| sp P50225 ST1A1_HUMAN   | -0.5761528 | 1.6960104 |
| sp P23786 CPT2_HUMAN    | -0.575634  | 1.5646582 |
| sp Q15599-2 NHRF2_HUMAN | -0.568903  | 2.6576471 |
| sp P35241 RADI_HUMAN    | -0.5682592 | 2.5461748 |
| sp P84103-2 SRSF3_HUMAN | -0.5641499 | 2.058973  |
| sp P02786 TFR1_HUMAN    | -0.558136  | 4.051346  |
| sp Q6YN16 HSDL2_HUMAN   | -0.5546532 | 1.6960104 |
| sp Q9HB40 RISC_HUMAN    | -0.5458317 | 1.6960104 |
| sp Q03135 CAV1_HUMAN    | -0.5396805 | 1.9647322 |
| sp Q86VB7-2 C163A_HUMAN | -0.5356674 | 8.558914  |
| sp P07339 CATD_HUMAN    | -0.5223236 | 6.689198  |
| sp P51149 RAB7A_HUMAN   | -0.5221939 | 4.876761  |
| sp P02750 A2GL_HUMAN    | -0.5206299 | 2.058973  |
| sp P24158 PRTN3_HUMAN   | -0.5085659 | 1.6960104 |
| sp P05026-2 AT1B1_HUMAN | -0.5036888 | 2.2323174 |
| sp P07355-2 ANXA2_HUMAN | -0.5031147 | 4.6930394 |
| sp P09525 ANXA4_HUMAN   | -0.4916973 | 6.6426344 |
| sp Q13740-2 CD166_HUMAN | -0.490305  | 4.005173  |
| sp Q7Z406 MYH14_HUMAN   | -0.4891434 | 6.9318466 |
| sp Q8IV08 PLD3_HUMAN    | -0.4888783 | 1.6960104 |
| sp Q9UHG3 PCYOX_HUMAN   | -0.4877491 | 4.3100786 |
| sp P01011 AACT_HUMAN    | -0.4869289 | 4.822602  |
| sp P0DP25 CALM3_HUMAN   | -0.4857369 | 3.5908275 |
| sp P04083 ANXA1_HUMAN   | -0.4837818 | 7.554525  |
| sp Q16698-2 DECR_HUMAN  | -0.4823761 | 3.9411435 |
| sp P51648-2 AL3A2_HUMAN | -0.4745617 | 4.051346  |
| sp P42765 THIM_HUMAN    | -0.4709015 | 4.3259945 |
| sp Q9NZN4 EHD2_HUMAN    | -0.4679947 | 6.5985336 |
| sp Q96TA1-2 NIBL1_HUMAN | -0.4605503 | 3.5908275 |
| sp Q16762 THTR_HUMAN    | -0.4599819 | 2.1818786 |
| sp P08729 K2C7_HUMAN    | -0.4582329 | 11.59981  |

|                         |            |           |
|-------------------------|------------|-----------|
| sp P17213 BPI_HUMAN     | -0.4571991 | 1.5646582 |
| sp Q5SSJ5-2 HP1B3_HUMAN | -0.4551811 | 2.1818786 |
| sp P02769 ALBU_BOVIN    | -0.4551582 | 2.8963943 |
| sp P55290-4 CAD13_HUMAN | -0.4547901 | 1.5646582 |
| sp P13804 ETFA_HUMAN    | -0.4528637 | 4.509013  |
| sp Q9H0U4 RAB1B_HUMAN   | -0.4520569 | 1.6960104 |
| sp P61421 VA0D1_HUMAN   | -0.4447193 | 3.103845  |
| sp P04040 CATA_HUMAN    | -0.4403496 | 8.905797  |
| sp P05109 S10A8_HUMAN   | -0.4378967 | 3.103845  |
| sp Q15907-2 RB11B_HUMAN | -0.4344215 | 3.4656596 |
| sp O75390 CISY_HUMAN    | -0.4323235 | 4.538682  |
| sp Q13228-4 SBP1_HUMAN  | -0.423996  | 10.208771 |
| sp Q13011 ECH1_HUMAN    | -0.4182987 | 4.964395  |
| sp Q9H223 EHD4_HUMAN    | -0.4151306 | 4.051346  |
| sp P62987 RL40_HUMAN    | -0.4110222 | 2.4829872 |
| sp P51572-2 BAP31_HUMAN | -0.4093552 | 3.5908275 |
| sp P80188 NGAL_HUMAN    | -0.4045868 | 2.3047035 |
| sp O95340-2 PAPS2_HUMAN | -0.4039936 | 1.3815327 |
| sp P49327 FAS_HUMAN     | -0.4026756 | 7.8719664 |
| sp P16671-4 CD36_HUMAN  | -0.4025955 | 2.1818786 |
| sp P43304 GPDM_HUMAN    | -0.4015522 | 3.5908275 |
| sp P23381 SYWC_HUMAN    | -0.4003544 | 3.9651341 |
| sp Q92817 EVPL_HUMAN    | -0.3982086 | 3.863062  |
| sp P05783 K1C18_HUMAN   | -0.3964844 | 7.252534  |
| sp P07099 HYEP_HUMAN    | -0.3942452 | 4.8271813 |
| sp O43837 IDH3B_HUMAN   | -0.3930492 | 1.6960104 |
| sp Q99715-4 COCA1_HUMAN | -0.3927822 | 1.6960104 |
| sp O15247 CLIC2_HUMAN   | -0.3889275 | 2.3047035 |
| sp P48735-2 IDHP_HUMAN  | -0.3881397 | 4.051346  |
| sp P50995-2 ANX11_HUMAN | -0.3852654 | 3.9439213 |
| sp Q9UHQ9 NB5R1_HUMAN   | -0.3827858 | 2.1818786 |
| sp P30512 1A29_HUMAN    | -0.3758812 | 1.4104178 |
| sp P09960 LKHA4_HUMAN   | -0.3755417 | 6.9708586 |
| sp P04179-4 SODM_HUMAN  | -0.3748474 | 2.6997027 |
| sp P50148 GNAQ_HUMAN    | -0.3715019 | 2.1818786 |
| sp Q6NUK1-2 SCMC1_HUMAN | -0.3695698 | 2.4829872 |
| sp P40121 CAPG_HUMAN    | -0.3683872 | 2.4314263 |
| sp P17931 LEG3_HUMAN    | -0.3678207 | 2.6576471 |
| sp O60234 GMFG_HUMAN    | -0.3625107 | 1.6960104 |
| sp O15230 LAMA5_HUMAN   | -0.3601475 | 6.0711555 |
| sp Q9UBQ0-2 VPS29_HUMAN | -0.35709   | 1.6960104 |
| sp Q14344 GNA13_HUMAN   | -0.3550758 | 2.1818786 |
| sp O75695 XRP2_HUMAN    | -0.3537598 | 1.4104178 |
| sp P30048-2 PRDX3_HUMAN | -0.3534584 | 2.6576471 |
| sp P10253 LYAG_HUMAN    | -0.3475781 | 3.1266599 |

|                         |            |           |
|-------------------------|------------|-----------|
| sp Q99536 VAT1_HUMAN    | -0.3471508 | 2.9903855 |
| sp P11310-2 ACADM_HUMAN | -0.3446541 | 4.051346  |
| sp P37837 TALDO_HUMAN   | -0.3439293 | 7.9589314 |
| sp Q9H4M9 EHD1_HUMAN    | -0.3435116 | 2.56956   |
| sp P62820 RAB1A_HUMAN   | -0.3433304 | 2.1818786 |
| sp Q9UL25 RAB21_HUMAN   | -0.3342934 | 2.151766  |
| sp Q06830 PRDX1_HUMAN   | -0.3335342 | 4.7229815 |
| sp P61604 CH10_HUMAN    | -0.3313484 | 3.1266599 |
| sp Q9HDC9 APMAP_HUMAN   | -0.3300076 | 3.545398  |
| sp O75348 VATG1_HUMAN   | -0.3287506 | 1.6960104 |
| sp P22897 MRC1_HUMAN    | -0.3262749 | 4.80653   |
| sp P36543-2 VATE1_HUMAN | -0.3259201 | 1.6960104 |
| sp P20645 MPRD_HUMAN    | -0.3256989 | 1.6960104 |
| sp Q02218-2 ODO1_HUMAN  | -0.3247566 | 3.316884  |
| sp Q96I99 SUCB2_HUMAN   | -0.3229885 | 2.923088  |
| sp P30040 ERP29_HUMAN   | -0.3214607 | 1.827201  |
| sp Q02252-2 MMSA_HUMAN  | -0.3211117 | 2.4829872 |
| sp Q00765 REEP5_HUMAN   | -0.3208427 | 3.1266599 |
| sp Q9Y6N5 SQOR_HUMAN    | -0.3194675 | 4.42992   |
| sp Q9NQC3 RTN4_HUMAN    | -0.3193054 | 1.5646582 |
| sp P56199 ITA1_HUMAN    | -0.3186779 | 5.4113336 |
| sp P04080 CYTB_HUMAN    | -0.3173714 | 1.6960104 |
| sp P07910-2 HNRPC_HUMAN | -0.3160648 | 2.1818786 |
| sp O94760 DDAH1_HUMAN   | -0.3137894 | 1.4716977 |
| sp Q6YHK3 CD109_HUMAN   | -0.3137074 | 3.8053288 |
| sp P24752 THIL_HUMAN    | -0.3118401 | 4.0641108 |
| sp P50213 IDH3A_HUMAN   | -0.3099766 | 2.9091687 |
| sp O15144 ARPC2_HUMAN   | -0.3026543 | 2.9807727 |
| sp P62258 1433E_HUMAN   | -0.2992439 | 2.1818786 |
| sp P05787-2 K2C8_HUMAN  | -0.2991314 | 8.819769  |
| sp P00568 KAD1_HUMAN    | -0.2982254 | 3.4731379 |
| sp P51148-2 RAB5C_HUMAN | -0.2973766 | 1.6960104 |
| sp Q13404 UB2V1_HUMAN   | -0.29599   | 1.6960104 |
| sp P09917 LOX5_HUMAN    | -0.2958374 | 1.560883  |
| sp P07988 PSPB_HUMAN    | -0.2955666 | 2.5461748 |
| sp P16435 NCPR_HUMAN    | -0.2932892 | 2.457975  |
| sp Q9H3N1 TMX1_HUMAN    | -0.2904739 | 1.6960104 |
| sp P14780 MMP9_HUMAN    | -0.2851467 | 2.1190927 |
| sp Q9NTX5-6 ECHD1_HUMAN | -0.2830849 | 2.4982266 |
| sp P40926 MDHM_HUMAN    | -0.2827225 | 6.8298965 |
| sp P22061-2 PIMT_HUMAN  | -0.2820168 | 2.1818786 |
| sp P26038 MOES_HUMAN    | -0.2779617 | 9.830367  |
| sp Q04917 1433F_HUMAN   | -0.2776279 | 4.2870226 |
| sp P10301 RRAS_HUMAN    | -0.2775421 | 1.6960104 |
| sp P27105 STOM_HUMAN    | -0.276453  | 2.8132849 |

|                         |            |           |
|-------------------------|------------|-----------|
| sp P55268 LAMB2_HUMAN   | -0.2762642 | 6.357367  |
| sp A6NMZ7 CO6A6_HUMAN   | -0.2754116 | 1.8087089 |
| sp P30740 ILEU_HUMAN    | -0.2719536 | 3.5908275 |
| sp P84095 RHOG_HUMAN    | -0.2705193 | 1.4104178 |
| sp Q14011-2 CIRBP_HUMAN | -0.2665091 | 1.6960104 |
| sp P22695 QCR2_HUMAN    | -0.266325  | 3.9417877 |
| sp P02763 A1AG1_HUMAN   | -0.2661858 | 1.6960104 |
| sp P28072 PSB6_HUMAN    | -0.2643738 | 1.6960104 |
| sp P54819-2 KAD2_HUMAN  | -0.2643604 | 1.6960104 |
| sp P36957 ODO2_HUMAN    | -0.2633457 | 4.509013  |
| sp P13797 PLST_HUMAN    | -0.2613106 | 2.352714  |
| sp P11177-3 ODPB_HUMAN  | -0.2592125 | 1.6832623 |
| sp P08571 CD14_HUMAN    | -0.2581139 | 1.7590232 |
| sp O00743-3 PPP6_HUMAN  | -0.2577343 | 1.6960104 |
| sp P35221 CTNA1_HUMAN   | -0.2567787 | 6.218706  |
| sp P13073 COX41_HUMAN   | -0.2543755 | 1.6960104 |
| sp O75955 FLOT1_HUMAN   | -0.2521362 | 2.024977  |
| sp P59998 ARPC4_HUMAN   | -0.252079  | 2.6576471 |
| sp P61019 RAB2A_HUMAN   | -0.2519512 | 3.1627245 |
| sp P35914 HMGCL_HUMAN   | -0.2471294 | 2.151766  |
| sp P09497-2 CLCB_HUMAN  | -0.2460728 | 2.1818786 |
| sp P20073-2 ANXA7_HUMAN | -0.2444668 | 1.9509854 |
| sp Q92597 NDRG1_HUMAN   | -0.2420425 | 1.3815327 |
| sp P48047 ATPO_HUMAN    | -0.2368012 | 1.5270832 |
| sp Q9H4G4 GAPR1_HUMAN   | -0.2343731 | 1.4104178 |
| sp Q9UIJ7 KAD3_HUMAN    | -0.2327251 | 3.1266599 |
| sp P84090 ERH_HUMAN     | -0.2316456 | 2.1818786 |
| sp Q00577 PURA_HUMAN    | -0.2309227 | 2.151766  |
| sp P21796 VDAC1_HUMAN   | -0.228796  | 2.4331102 |
| sp P35222 CTNB1_HUMAN   | -0.2280865 | 1.5121045 |
| sp P35232 PHB_HUMAN     | -0.2238922 | 3.2217336 |
| sp Q6NVY1 HIBCH_HUMAN   | -0.221098  | 1.3815327 |
| sp P51858 HDGF_HUMAN    | -0.2206936 | 2.1818786 |
| sp P99999 CYC_HUMAN     | -0.2190323 | 2.1818786 |
| sp P22626 ROA2_HUMAN    | -0.2182941 | 4.0610723 |
| sp Q9HCC0 MCCB_HUMAN    | -0.2178021 | 1.5054473 |
| sp P11413-2 G6PD_HUMAN  | -0.2163086 | 2.0598862 |
| sp P01009 A1AT_HUMAN    | -0.216116  | 6.016212  |
| sp O43491 E41L2_HUMAN   | -0.2146015 | 1.9308543 |
| sp Q9BS26 ERP44_HUMAN   | -0.2145557 | 2.838374  |
| sp P17844-2 DDX5_HUMAN  | -0.2141151 | 1.560883  |
| sp Q9UHB6-4 LIMA1_HUMAN | -0.2113991 | 1.3815327 |
| sp P02760 AMBP_HUMAN    | -0.2072048 | 1.9509854 |
| sp P62873 GBB1_HUMAN    | -0.2058067 | 1.3184075 |
| sp P23246 SFPQ_HUMAN    | -0.204464  | 2.1952481 |

|                         |            |           |
|-------------------------|------------|-----------|
| sp P62316-2 SMD2_HUMAN  | -0.2037029 | 1.6960104 |
| sp P20340-2 RAB6A_HUMAN | -0.2027226 | 2.2323174 |
| sp Q08257 QOR_HUMAN     | -0.2006283 | 2.2535503 |
| sp O75367-2 H2AY_HUMAN  | -0.2003784 | 1.4278674 |
| sp Q16853 AOC3_HUMAN    | -0.198143  | 1.5942118 |
| sp P05556 ITB1_HUMAN    | -0.1957722 | 4.9799447 |
| sp P35237 SPB6_HUMAN    | -0.1930389 | 3.1533113 |
| sp P11215-2 ITAM_HUMAN  | -0.1915836 | 1.6997428 |
| sp P27361 MK03_HUMAN    | -0.1914883 | 1.6960104 |
| sp P10515 ODP2_HUMAN    | -0.1908073 | 1.9190748 |
| sp P30533 AMRP_HUMAN    | -0.1884346 | 1.6997428 |
| sp P49748-2 ACADV_HUMAN | -0.1879902 | 5.5088854 |
| sp P40429 RL13A_HUMAN   | -0.1871948 | 1.6960104 |
| sp P38606 VATA_HUMAN    | -0.1865616 | 2.9903855 |
| sp Q9Y277-2 VDAC3_HUMAN | -0.1813965 | 2.653196  |
| sp P50552 VASP_HUMAN    | -0.1753101 | 2.432837  |
| sp P08727 K1C19_HUMAN   | -0.1746159 | 4.5162024 |
| sp P08758 ANXA5_HUMAN   | -0.1741943 | 1.5011283 |
| sp P11047 LAMC1_HUMAN   | -0.1715164 | 4.874187  |
| sp P30041 PRDX6_HUMAN   | -0.1709061 | 3.7671235 |
| sp P00352 AL1A1_HUMAN   | -0.1706467 | 4.9527197 |
| sp P62993 GRB2_HUMAN    | -0.169838  | 1.827201  |
| sp P38646 GRP75_HUMAN   | -0.1698265 | 2.8603818 |
| sp Q99729-3 ROAA_HUMAN  | -0.1661644 | 1.9997257 |
| sp P10606 COX5B_HUMAN   | -0.1642456 | 1.6960104 |
| sp P52209-2 6PGD_HUMAN  | -0.162281  | 1.5175526 |
| sp P14543-2 NID1_HUMAN  | -0.1590519 | 3.4268153 |
| sp Q00839 HNRPU_HUMAN   | -0.1577263 | 1.872644  |
| sp P54920 SNAA_HUMAN    | -0.1562367 | 1.6265627 |
| sp O00264 PGRC1_HUMAN   | -0.1554585 | 2.3143692 |
| sp Q03252 LMNB2_HUMAN   | -0.15485   | 5.8857155 |
| sp P16219 ACADS_HUMAN   | -0.1546516 | 1.4278674 |
| sp Q02543 RL18A_HUMAN   | -0.1546459 | 1.9413493 |
| sp P05023 AT1A1_HUMAN   | -0.1519222 | 4.0484858 |
| sp P13796 PLSL_HUMAN    | -0.1516838 | 5.3970337 |
| sp P00325 ADH1B_HUMAN   | -0.1501389 | 1.3635377 |
| sp P23141-2 EST1_HUMAN  | -0.1501236 | 4.322409  |
| sp P08572 CO4A2_HUMAN   | -0.1487522 | 1.867911  |
| sp Q13185 CBX3_HUMAN    | -0.1469383 | 2.1818786 |
| sp P27487 DPP4_HUMAN    | -0.1467362 | 1.7590232 |
| sp P52565 GDIR1_HUMAN   | -0.1457233 | 1.8595492 |
| sp P21281 VATB2_HUMAN   | -0.144105  | 1.6295799 |
| sp P00390-2 GSHR_HUMAN  | -0.1436386 | 2.3143692 |
| sp P04004 VTNC_HUMAN    | -0.1404648 | 2.0727112 |
| sp P06737-2 PYGL_HUMAN  | -0.1395302 | 2.096182  |

|                         |            |           |
|-------------------------|------------|-----------|
| sp P10809 CH60_HUMAN    | -0.1387253 | 2.152236  |
| sp P09622 DLDH_HUMAN    | -0.1370926 | 2.173994  |
| sp O75369-2 FLNB_HUMAN  | -0.1360016 | 4.2932334 |
| sp Q07020-2 RL18_HUMAN  | -0.1313477 | 1.6960104 |
| sp Q02878 RL6_HUMAN     | -0.1270618 | 1.6960104 |
| sp P20700 LMNB1_HUMAN   | -0.1253357 | 4.6877613 |
| sp Q14103-3 HNRPD_HUMAN | -0.1238289 | 1.9473329 |
| sp Q16555 DPYL2_HUMAN   | -0.1199493 | 1.6404219 |
| sp P00367 DHE3_HUMAN    | -0.1185989 | 1.9153107 |
| sp P35580-3 MYH10_HUMAN | -0.1126404 | 5.4172683 |
| sp P23528 COF1_HUMAN    | -0.110918  | 1.7565529 |
| sp P02545 LMNA_HUMAN    | -0.1102696 | 7.0661864 |
| sp P05198 IF2A_HUMAN    | -0.107914  | 1.9647322 |
| sp P00387-3 NB5R3_HUMAN | -0.1078396 | 1.7713763 |
| sp O14745 NHRF1_HUMAN   | -0.1066952 | 1.6960104 |
| sp P06576 ATPB_HUMAN    | -0.1066494 | 2.450404  |
| sp P35579 MYH9_HUMAN    | -0.1042519 | 2.6082938 |
| sp P15586-2 GNS_HUMAN   | -0.1024418 | 1.6960104 |
| sp Q86UP2-4 KTN1_HUMAN  | -0.0962372 | 2.3499942 |
| sp O95831-3 AIFM1_HUMAN | -0.0960865 | 1.4068714 |
| sp P07237 PDIA1_HUMAN   | -0.0943966 | 3.2734182 |
| sp P17655 CAN2_HUMAN    | -0.0934277 | 1.3924598 |
| sp Q9NRN5-2 OLFL3_HUMAN | -0.0910015 | 1.7265131 |
| sp P00505 AATM_HUMAN    | -0.0807552 | 1.3908802 |
| sp P23396 RS3_HUMAN     | -0.0792408 | 1.572624  |
| sp O43707 ACTN4_HUMAN   | -0.0664043 | 2.6716063 |
| sp Q13561-2 DCTN2_HUMAN | -0.0615501 | 1.3079358 |
| sp P12109 CO6A1_HUMAN   | -0.0550308 | 1.4578869 |
| sp Q07954 LRP1_HUMAN    | -0.0521545 | 1.406226  |
| sp P98160 PGBM_HUMAN    | 0.0792675  | 2.398297  |
| sp P23456 Trypsin       | 0.08312607 | 2.653196  |
| sp P19971 TYPH_HUMAN    | 0.08837318 | 2.3149889 |
| sp P55072 TERA_HUMAN    | 0.08870125 | 2.9725993 |
| sp Q14258 TRI25_HUMAN   | 0.08972931 | 2.0727112 |
| sp P48444 COPD_HUMAN    | 0.09312439 | 3.2952836 |
| sp Q9NYU2-2 UGGG1_HUMAN | 0.09363747 | 1.8576962 |
| sp P00751 CFAB_HUMAN    | 0.09413147 | 3.3201993 |
| sp P11766 ADHX_HUMAN    | 0.09490776 | 2.1242583 |
| sp P13010 XRCC5_HUMAN   | 0.09754181 | 1.7944541 |
| sp P12270 TPR_HUMAN     | 0.10106278 | 1.6099055 |
| sp P02790 HEMO_HUMAN    | 0.10350418 | 2.593232  |
| sp P62277 RS13_HUMAN    | 0.10745239 | 1.5646582 |
| sp P04075 ALDOA_HUMAN   | 0.10763741 | 2.8820472 |
| sp P27797 CALR_HUMAN    | 0.10840225 | 2.8438601 |
| sp P15374 UCHL3_HUMAN   | 0.10953617 | 1.9647322 |

|                         |            |           |
|-------------------------|------------|-----------|
| sp P60174 TPIS_HUMAN    | 0.11014938 | 1.7658234 |
| sp Q15631 TSN_HUMAN     | 0.11097145 | 1.3815327 |
| sp P35606 COPB2_HUMAN   | 0.11163712 | 3.0497963 |
| sp Q13409-3 DC112_HUMAN | 0.11255074 | 1.3080103 |
| sp Q9BRF8-2 CPPED_HUMAN | 0.11283493 | 1.6960104 |
| sp Q9UEY8 ADDG_HUMAN    | 0.1131134  | 1.3319147 |
| sp P11277-2 SPTB1_HUMAN | 0.1154995  | 3.213026  |
| sp P49368 TCPG_HUMAN    | 0.11598778 | 3.3390138 |
| sp Q15019-2 SEPT2_HUMAN | 0.11602211 | 3.8199413 |
| sp P55786 PSA_HUMAN     | 0.11661148 | 1.4931748 |
| sp P13489 RINI_HUMAN    | 0.11842728 | 3.8108344 |
| sp P04003 C4BPA_HUMAN   | 0.11902046 | 1.7647069 |
| sp P08238 HS90B_HUMAN   | 0.11961556 | 2.1952481 |
| sp P01008 ANT3_HUMAN    | 0.11963654 | 3.056411  |
| sp P02748 CO9_HUMAN     | 0.11990547 | 2.3801057 |
| sp O75083 WDR1_HUMAN    | 0.12046433 | 1.7198673 |
| sp Q92900-2 RENT1_HUMAN | 0.12333679 | 1.3567923 |
| sp P14868 SYDC_HUMAN    | 0.12359428 | 1.8831652 |
| sp Q15582 BGH3_HUMAN    | 0.12419128 | 3.5922449 |
| sp P35611-2 ADDA_HUMAN  | 0.12532997 | 1.6997428 |
| sp P04196 HRG_HUMAN     | 0.13068771 | 1.6545225 |
| sp P17987 TCPA_HUMAN    | 0.13184357 | 3.4120767 |
| sp P50991-2 TCPD_HUMAN  | 0.13451958 | 1.4595377 |
| sp P12956 XRCC6_HUMAN   | 0.13542175 | 2.6867676 |
| sp P78371 TCPB_HUMAN    | 0.13794613 | 3.3269932 |
| sp Q16181-2 SEPT7_HUMAN | 0.14226913 | 2.2401297 |
| sp Q15084-2 PDIA6_HUMAN | 0.14301682 | 4.3492994 |
| sp Q13838-2 DX39B_HUMAN | 0.14522362 | 1.7590232 |
| sp P36955 PEDF_HUMAN    | 0.14533997 | 1.560883  |
| sp P17174 AATC_HUMAN    | 0.14637756 | 3.1092827 |
| sp P35527 K1C9_HUMAN    | 0.1491394  | 1.8521893 |
| sp Q15942 ZYX_HUMAN     | 0.1492405  | 1.9190748 |
| sp P05166-2 PCCB_HUMAN  | 0.15037727 | 1.7713763 |
| sp P05546 HEP2_HUMAN    | 0.15332985 | 1.4278674 |
| sp P01042-2 KNG1_HUMAN  | 0.15333557 | 4.192454  |
| sp P60660-2 MYL6_HUMAN  | 0.15379333 | 3.5844223 |
| sp P32969 RL9_HUMAN     | 0.15526009 | 1.6960104 |
| sp P11216 PYGB_HUMAN    | 0.15541649 | 3.4001613 |
| sp O75306-2 NDUS2_HUMAN | 0.15639114 | 1.9647322 |
| sp Q9NZ08-2 ERAP1_HUMAN | 0.15642929 | 2.2613342 |
| sp P28838-2 AMPL_HUMAN  | 0.15711403 | 4.0538487 |
| sp P07195 LDHB_HUMAN    | 0.16043854 | 3.3575702 |
| sp P10768 ESTD_HUMAN    | 0.16093445 | 2.151766  |
| sp P39656-3 OST48_HUMAN | 0.16125488 | 3.2450993 |
| sp P50454 SERPH_HUMAN   | 0.16126823 | 3.7273152 |



|                         |            |           |
|-------------------------|------------|-----------|
| sp P62917 RL8_HUMAN     | 0.16289902 | 2.4829872 |
| sp P00747 PLMN_HUMAN    | 0.16430664 | 2.329737  |
| sp Q15293 RCN1_HUMAN    | 0.16615105 | 2.151766  |
| sp P10909-5 CLUS_HUMAN  | 0.16880798 | 3.364204  |
| sp P49591 SYSC_HUMAN    | 0.17050743 | 1.5688182 |
| sp P21980 TGM2_HUMAN    | 0.17184067 | 5.034626  |
| sp P09104-2 ENOG_HUMAN  | 0.17235947 | 1.827201  |
| sp Q9Y5Z4 HEBP2_HUMAN   | 0.17297363 | 1.6960104 |
| sp P13716-2 HEM2_HUMAN  | 0.1766491  | 2.1404836 |
| sp Q15075 EEA1_HUMAN    | 0.17808533 | 3.1957111 |
| sp P04264 K2C1_HUMAN    | 0.17863846 | 3.8732924 |
| sp Q07507 DERM_HUMAN    | 0.18115997 | 1.5983955 |
| sp Q14112-2 NID2_HUMAN  | 0.18191719 | 2.4945192 |
| sp P13798 ACPH_HUMAN    | 0.18277359 | 3.4366283 |
| sp P32119 PRDX2_HUMAN   | 0.18462372 | 3.324656  |
| sp Q8IUX7 AEBP1_HUMAN   | 0.18579865 | 2.058973  |
| sp O43852-3 CALU_HUMAN  | 0.18707085 | 1.5646582 |
| sp Q96G03 PGM2_HUMAN    | 0.18795776 | 3.0819354 |
| sp P06744 G6PI_HUMAN    | 0.19141388 | 5.1049714 |
| sp Q7KZF4 SND1_HUMAN    | 0.1934967  | 4.033051  |
| sp P11021 BIP_HUMAN     | 0.19404411 | 9.761793  |
| sp P34932 HSP74_HUMAN   | 0.19512367 | 2.5322723 |
| sp P08670 VIME_HUMAN    | 0.19625092 | 12.945139 |
| sp P45974-2 UBP5_HUMAN  | 0.19674873 | 3.4260464 |
| sp Q00341-2 VIGLN_HUMAN | 0.19779205 | 1.4751658 |
| sp P53618 COPB_HUMAN    | 0.20006752 | 2.5975564 |
| sp P29622 KAIN_HUMAN    | 0.20021439 | 1.4278674 |
| sp O14828-2 SCAM3_HUMAN | 0.2006855  | 1.4104178 |
| sp Q3LXA3 TKFC_HUMAN    | 0.20126152 | 1.8992519 |
| sp P06756-3 ITAV_HUMAN  | 0.20303535 | 2.0727112 |
| sp P23526 SAHH_HUMAN    | 0.20618057 | 3.939045  |
| sp P01031 CO5_HUMAN     | 0.20630074 | 4.5719495 |
| sp Q9Y5M8 SRPRB_HUMAN   | 0.2074585  | 2.1818786 |
| sp P00338 LDHA_HUMAN    | 0.20765495 | 2.3798928 |
| sp P08133 ANXA6_HUMAN   | 0.20774078 | 7.768831  |
| sp O75112-7 LDB3_HUMAN  | 0.2108059  | 1.6960104 |
| sp O00534 VMA5A_HUMAN   | 0.2110672  | 2.792622  |
| sp P53621-2 COPA_HUMAN  | 0.2111969  | 2.8653378 |
| sp P49419-2 AL7A1_HUMAN | 0.2119484  | 4.8271813 |
| sp Q8IZ83-3 A16A1_HUMAN | 0.21495247 | 2.923088  |
| sp P18669 PGAM1_HUMAN   | 0.21733093 | 3.3575702 |
| sp P22314 UBA1_HUMAN    | 0.21953583 | 3.4109392 |
| sp Q6XQN6-2 PNCB_HUMAN  | 0.22079849 | 2.312627  |
| sp P13647 K2C5_HUMAN    | 0.22121048 | 4.177984  |
| sp Q9Y4L1 HYOU1_HUMAN   | 0.22472382 | 5.1043024 |

|                         |            |            |
|-------------------------|------------|------------|
| sp P26373 RL13_HUMAN    | 0.22521782 | 1.9647322  |
| sp P41250 GARS_HUMAN    | 0.22646332 | 2.4364867  |
| sp P13639 EF2_HUMAN     | 0.22688866 | 10.2286415 |
| sp O00151 PDLI1_HUMAN   | 0.22835922 | 3.0019732  |
| sp O00567 NOP56_HUMAN   | 0.22846031 | 2.987788   |
| sp P08236-2 BGLR_HUMAN  | 0.23007011 | 2.1818786  |
| sp Q14847 LASP1_HUMAN   | 0.23071861 | 1.3567923  |
| sp P04259 K2C6B_HUMAN   | 0.23261642 | 1.4716977  |
| sp Q00796 DHSO_HUMAN    | 0.23573303 | 1.6960104  |
| sp Q16643-3 DREB_HUMAN  | 0.2362442  | 1.3815327  |
| sp Q86VP6 CAND1_HUMAN   | 0.23660469 | 4.302124   |
| sp P51888 PRELP_HUMAN   | 0.23730278 | 5.4389644  |
| sp P68871 HBB_HUMAN     | 0.23765182 | 1.9190748  |
| sp Q16647 PTGIS_HUMAN   | 0.23812866 | 1.7713763  |
| sp P04843 RPN1_HUMAN    | 0.24079323 | 7.128238   |
| sp Q9Y315 DEOC_HUMAN    | 0.24085617 | 1.5646582  |
| sp P07814 SYEP_HUMAN    | 0.2413969  | 1.5983955  |
| sp P49961-6 ENTP1_HUMAN | 0.24535179 | 1.4104178  |
| sp P07738 PMGE_HUMAN    | 0.24539757 | 2.1818786  |
| sp P26640 SYVC_HUMAN    | 0.24635315 | 1.8595492  |
| sp P43243 MATR3_HUMAN   | 0.24765778 | 2.4829872  |
| sp P46782 RS5_HUMAN     | 0.24921417 | 1.5270832  |
| sp O60763-2 USO1_HUMAN  | 0.25033188 | 3.292093   |
| sp Q9Y6C2 EMIL1_HUMAN   | 0.2532196  | 5.964717   |
| sp Q9BS40 LXN_HUMAN     | 0.25531197 | 1.3815327  |
| sp Q08378 GOGA3_HUMAN   | 0.25557804 | 1.6960104  |
| sp P07437 TBB5_HUMAN    | 0.25600052 | 1.3815327  |
| sp Q13263 TIF1B_HUMAN   | 0.25677872 | 4.2451677  |
| sp Q9NPH2 INO1_HUMAN    | 0.25792885 | 1.9413493  |
| sp P39060-1 COIA1_HUMAN | 0.2592697  | 2.6576471  |
| sp Q63ZY3-3 KANK2_HUMAN | 0.26375866 | 2.4829872  |
| sp Q9H008 LHPP_HUMAN    | 0.2661295  | 1.9413493  |
| sp P22105-1 TENX_HUMAN  | 0.27624702 | 7.847662   |
| sp Q9NR45 SIAS_HUMAN    | 0.27723694 | 3.734273   |
| sp Q9UBG0 MRC2_HUMAN    | 0.2777338  | 2.3388627  |
| sp O14974-3 MYPT1_HUMAN | 0.27806664 | 3.1208909  |
| sp P48147 PPCE_HUMAN    | 0.27841568 | 2.044628   |
| sp P27338 AOFB_HUMAN    | 0.2805977  | 4.6488075  |
| sp P36578 RL4_HUMAN     | 0.28272247 | 3.103845   |
| sp P26639-2 SYTC_HUMAN  | 0.2840023  | 2.6196775  |
| sp P00915 CAH1_HUMAN    | 0.28445053 | 7.665951   |
| sp O43175 SERA_HUMAN    | 0.28564072 | 2.0928013  |
| sp Q07065 CKAP4_HUMAN   | 0.2858925  | 9.554357   |
| sp P00450 CERU_HUMAN    | 0.28695488 | 11.220342  |
| sp A1L4H1 SRCRL_HUMAN   | 0.29042244 | 1.6960104  |

|                          |            |           |
|--------------------------|------------|-----------|
| sp O00754-2 MA2B1_HUMAN  | 0.29284477 | 2.1818786 |
| sp P11498 PYC_HUMAN      | 0.29406834 | 1.6960104 |
| sp Q01813-2 PFKAP_HUMAN  | 0.29421425 | 1.4278674 |
| sp P62701 RS4X_HUMAN     | 0.29473305 | 2.1818786 |
| sp P62140 PP1B_HUMAN     | 0.2952404  | 1.4104178 |
| sp P08648 ITA5_HUMAN     | 0.29639435 | 1.6960104 |
| sp Q96C86 DCPS_HUMAN     | 0.2985916  | 1.6960104 |
| sp P12277 KCRB_HUMAN     | 0.30036163 | 1.8350728 |
| sp P00488 F13A_HUMAN     | 0.30101776 | 5.226002  |
| sp Q6PCB0 VWA1_HUMAN     | 0.303154   | 1.6960104 |
| sp P08294 SODE_HUMAN     | 0.30364227 | 2.058973  |
| sp P05534 1A24_HUMAN     | 0.3069992  | 1.6960104 |
| sp P13667 PDIA4_HUMAN    | 0.31037712 | 10.021521 |
| sp P22234-2 PUR6_HUMAN   | 0.3150158  | 2.6576471 |
| sp P35555 FBN1_HUMAN     | 0.31578445 | 9.35835   |
| sp Q9Y678 COPG1_HUMAN    | 0.31764698 | 6.253077  |
| sp P62241 RS8_HUMAN      | 0.31874084 | 3.1266599 |
| sp P06727 APOA4_HUMAN    | 0.3200302  | 6.3204336 |
| sp Q9UBT2 SAE2_HUMAN     | 0.32409096 | 2.1818786 |
| sp P80303-2 NUCB2_HUMAN  | 0.32975006 | 2.1818786 |
| sp P08603 CFAH_HUMAN     | 0.33151627 | 14.632371 |
| sp P04114 APOB_HUMAN     | 0.33409882 | 9.866501  |
| sp O60547-2 GMDS_HUMAN   | 0.33465576 | 1.6960104 |
| sp P46779-2 RL28_HUMAN   | 0.34303093 | 1.3815327 |
| sp Q92896-2 GSLG1_HUMAN  | 0.34387589 | 4.051346  |
| sp P02647 APOA1_HUMAN    | 0.35307884 | 11.261091 |
| sp P08708 RS17_HUMAN     | 0.35313797 | 2.0727112 |
| sp P62266 RS23_HUMAN     | 0.35681725 | 1.560883  |
| sp P18206-2 VINC_HUMAN   | 0.35928726 | 14.699317 |
| sp P49257 LMAN1_HUMAN    | 0.36786652 | 3.4656596 |
| sp O60831 PRAF2_HUMAN    | 0.37101555 | 1.6960104 |
| sp P55809 SCOT1_HUMAN    | 0.37223244 | 1.6960104 |
| sp Q07960 RHG01_HUMAN    | 0.37650108 | 3.9417877 |
| sp P23142 FBLN1_HUMAN    | 0.37883377 | 2.432837  |
| sp P49588-2 SYAC_HUMAN   | 0.37958527 | 5.1321483 |
| sp Q13162 PRDX4_HUMAN    | 0.38264084 | 3.1266599 |
| sp P08237-3 PFKAM_HUMAN  | 0.39874268 | 1.9951487 |
| sp O75746-2 CMC1_HUMAN   | 0.40784454 | 1.6960104 |
| sp P21399 ACOC_HUMAN     | 0.40868092 | 3.5908275 |
| sp Q9HCB6 SPON1_HUMAN    | 0.40994644 | 3.218121  |
| sp P16615 AT2A2_HUMAN    | 0.41054535 | 7.665951  |
| sp P28331-2 NDUS1_HUMAN  | 0.41399384 | 2.6576471 |
| sp Q96D15 RCN3_HUMAN     | 0.41708374 | 1.6960104 |
| sp O94979-10 SC31A_HUMAN | 0.418602   | 1.6960104 |
| sp P07585 PGS2_HUMAN     | 0.4290676  | 5.417897  |

|                         |            |           |
|-------------------------|------------|-----------|
| sp P51884 LUM_HUMAN     | 0.43702698 | 8.112776  |
| sp P01860 IGHG3_HUMAN   | 0.445076   | 2.6576471 |
| sp P14618-2 KPYM_HUMAN  | 0.44867325 | 1.4104178 |
| sp Q8TDL5 BPIB1_HUMAN   | 0.45905113 | 2.1404836 |
| sp P27169 PON1_HUMAN    | 0.462965   | 1.6960104 |
| sp P21266 GSTM3_HUMAN   | 0.46615982 | 3.2221727 |
| sp P15090 FABP4_HUMAN   | 0.47262955 | 3.1266599 |
| sp P20774 MIME_HUMAN    | 0.4789791  | 4.051346  |
| sp Q9BXN1 ASPN_HUMAN    | 0.4850235  | 2.6576471 |
| sp P21291 CSRP1_HUMAN   | 0.48706055 | 5.417897  |
| sp Q8N2S1 LTBP4_HUMAN   | 0.489254   | 5.1954384 |
| sp P46821 MAP1B_HUMAN   | 0.49632072 | 2.1818786 |
| sp Q9P2E9 RRBP1_HUMAN   | 0.50429535 | 14.010107 |
| sp P40261 NNMT_HUMAN    | 0.5057678  | 1.6960104 |
| sp Q9P2B2 FPRP_HUMAN    | 0.51496696 | 2.4982266 |
| sp Q8TAQ2-2 SMRC2_HUMAN | 0.5172024  | 1.6960104 |
| sp O43301 HS12A_HUMAN   | 0.5412369  | 2.1818786 |
| sp P0DOX7 IGK_HUMAN     | 0.5487232  | 2.1818786 |
| sp P10643 CO7_HUMAN     | 0.5596638  | 4.6930394 |
| sp Q93052 LPP_HUMAN     | 0.57123566 | 4.0641108 |
| sp Q14195-2 DPYL3_HUMAN | 0.57148933 | 7.6308155 |
| sp P13611 CSPG2_HUMAN   | 0.5725651  | 5.417897  |
| sp Q15746-2 MYLK_HUMAN  | 0.58844376 | 7.023118  |
| sp P04792 HSPB1_HUMAN   | 0.5965004  | 7.2183566 |
| sp P49821-2 NDUV1_HUMAN | 0.59955406 | 3.5908275 |
| sp Q12765 SCRN1_HUMAN   | 0.6042862  | 2.1818786 |
| sp P98095-2 FBLN2_HUMAN | 0.6089096  | 5.727641  |
| sp P07951-3 TPM2_HUMAN  | 0.61615753 | 2.1818786 |
| sp Q12805-2 FBLN3_HUMAN | 0.62044334 | 6.3204336 |
| sp Q0ZGT2-4 NEXN_HUMAN  | 0.6363869  | 4.509013  |
| sp O14558 HSPB6_HUMAN   | 0.64740086 | 2.4829872 |
| sp Q8TCJ2 STT3B_HUMAN   | 0.6737709  | 1.6960104 |
| sp P24844 MYL9_HUMAN    | 0.6821308  | 1.6960104 |
| sp P39059 COFA1_HUMAN   | 0.6852684  | 2.1818786 |
| sp P01876 IGHA1_HUMAN   | 0.6911583  | 3.8503277 |
| sp P08123 CO1A2_HUMAN   | 0.6953697  | 2.4829872 |
| sp P0DOX8 IGL1_HUMAN    | 0.7290058  | 2.1818786 |
| sp Q15124 PGM5_HUMAN    | 0.7313175  | 7.7619967 |
| sp Q53GG5-2 PDLI3_HUMAN | 0.7598858  | 2.1818786 |
| sp Q14767 LTBP2_HUMAN   | 0.7632408  | 5.4738517 |
| sp P36269-3 GGT5_HUMAN  | 0.7655754  | 3.1266599 |
| sp Q8NBS9 TXND5_HUMAN   | 0.7702637  | 7.665951  |
| sp P09493-9 TPM1_HUMAN  | 0.7703991  | 1.6960104 |
| sp Q14192 FHL2_HUMAN    | 0.77052116 | 2.1818786 |
| sp P02452 CO1A1_HUMAN   | 0.80664444 | 2.058973  |

|                         |            |            |
|-------------------------|------------|------------|
| sp P07951 TPM2_HUMAN    | 0.8124237  | 3.1266599  |
| sp O15061 SYNEM_HUMAN   | 0.8277254  | 3.5190198  |
| sp Q9UBX5 FBLN5_HUMAN   | 0.82930183 | 4.4116287  |
| sp P67936-2 TPM4_HUMAN  | 0.8699379  | 1.6960104  |
| sp P09493-8 TPM1_HUMAN  | 0.87311935 | 3.5908275  |
| sp P07451 CAH3_HUMAN    | 0.8733654  | 3.1266599  |
| sp P51911 CNN1_HUMAN    | 0.98700523 | 4.8353806  |
| sp Q9NYL4 FKB11_HUMAN   | 0.9936676  | 1.6960104  |
| sp Q9NR12-2 PDLI7_HUMAN | 1.0516167  | 2.1800864  |
| sp Q14315-2 FLNC_HUMAN  | 1.0989723  | 15.95459   |
| sp Q8WU39 MZB1_HUMAN    | 1.1754417  | 3.1266599  |
| sp P0DOY3 IGLC3_HUMAN   | 1.1758022  | 2.1818786  |
| sp Q8WX93-5 PALLD_HUMAN | 1.1878853  | 1.6960104  |
| sp P01859 IGHG2_HUMAN   | 1.2014732  | 4.509013   |
| sp Q01995 TAGL_HUMAN    | 1.2401638  | 9.004438   |
| sp Q9UMS6-2 SYNP2_HUMAN | 1.2932491  | 4.051346   |
| sp P01861 IGHG4_HUMAN   | 1.3670502  | 3.5908275  |
| sp P01871-2 IGHM_HUMAN  | 1.4475918  | 2.1818786  |
| sp P0DOX5 IGG1_HUMAN    | 1.6017609  | 4.964395   |
| sp Q05682 CALD1_HUMAN   | 1.6363449  | 1.6960104  |
| sp P17661 DESM_HUMAN    | 1.7278194  | 14.778499  |
| sp P04229 2B11_HUMAN    | -2.8930798 | 0.656254   |
| sp O00757 F16P2_HUMAN   | -1.7075348 | 1.1932944  |
| sp Q9BW04 SARG_HUMAN    | -1.6432972 | 0.7827403  |
| sp P08246 ELNE_HUMAN    | -1.3534603 | 1.1932944  |
| sp P02741 CRP_HUMAN     | -1.256094  | 1.1932944  |
| sp P13761 2B17_HUMAN    | -1.1777973 | 0          |
| sp P16422 EPCAM_HUMAN   | -1.1038246 | 1.1932944  |
| sp P37235 HPCL1_HUMAN   | -1.0896969 | 0.656254   |
| sp O00592-2 PODXL_HUMAN | -0.9956284 | 1.1932944  |
| sp Q29963 1C06_HUMAN    | -0.9643707 | 0.656254   |
| sp P13760 2B14_HUMAN    | -0.9356289 | 1.2773042  |
| sp P08263 GSTA1_HUMAN   | -0.9255199 | 0          |
| sp P20702 ITAX_HUMAN    | -0.8820229 | 0.656254   |
| sp P33151 CADH5_HUMAN   | -0.8706608 | 1.1932944  |
| sp Q16777 H2A2C_HUMAN   | -0.8573284 | 1.1932944  |
| sp Q9UHN6-2 CEIP2_HUMAN | -0.8241749 | 1.1932944  |
| sp P63218 GBG5_HUMAN    | -0.818264  | 1.1932944  |
| sp Q93077 H2A1C_HUMAN   | -0.7896423 | 0.7827403  |
| sp Q01955 CO4A3_HUMAN   | -0.7775497 | 1.1932944  |
| sp Q9HD89 RETN_HUMAN    | -0.7740288 | 0.7827403  |
| sp O43795-2 MYO1B_HUMAN | -0.7717695 | 0.45033538 |
| sp P12830 CADH1_HUMAN   | -0.7701187 | 0.19149946 |
| sp P28330 ACADL_HUMAN   | -0.7540493 | 1.1932944  |
| sp P54108-2 CRIS3_HUMAN | -0.7452393 | 0.656254   |

|                         |            |            |
|-------------------------|------------|------------|
| sp O95837 GNA14_HUMAN   | -0.7261391 | 0.656254   |
| sp P28799-3 GRN_HUMAN   | -0.7151375 | 1.1505735  |
| sp Q8NBQ5 DHB11_HUMAN   | -0.6837521 | 1.1932944  |
| sp P06753-6 TPM3_HUMAN  | -0.6835861 | 0.656254   |
| sp Q13751 LAMB3_HUMAN   | -0.6515122 | 0.7061832  |
| sp P22894 MMP8_HUMAN    | -0.6477661 | 0.19149946 |
| sp P38159 RBMX_HUMAN    | -0.6335316 | 0.656254   |
| sp A6NMY6 AXA2L_HUMAN   | -0.6320591 | 0.656254   |
| sp Q9H8L6 MMRN2_HUMAN   | -0.6018677 | 0.7827403  |
| sp Q9NPY3 C1QR1_HUMAN   | -0.5997353 | 1.1932944  |
| sp P01111 RASN_HUMAN    | -0.5851975 | 0.656254   |
| sp Q7L2H7 EIF3M_HUMAN   | -0.574894  | 0.656254   |
| sp Q9NVJ2 ARL8B_HUMAN   | -0.5640602 | 1.1932944  |
| sp Q9H2U2-3 IPYR2_HUMAN | -0.5592861 | 0.656254   |
| sp P06703 S10A6_HUMAN   | -0.5528927 | 1.1932944  |
| sp P51606-2 RENBP_HUMAN | -0.5432911 | 1.1932944  |
| sp P20292 AL5AP_HUMAN   | -0.5374985 | 0.7061832  |
| sp Q9NPJ3 ACO13_HUMAN   | -0.5284443 | 1.1932944  |
| sp Q96BM9 ARL8A_HUMAN   | -0.527935  | 0.656254   |
| sp Q03135-2 CAV1_HUMAN  | -0.5211258 | 0.656254   |
| sp P63167 DYL1_HUMAN    | -0.5180721 | 0.656254   |
| sp P61601 NCALD_HUMAN   | -0.5154629 | 0.656254   |
| sp O76041-2 NEBL_HUMAN  | -0.5078144 | 0.656254   |
| sp Q12846 STX4_HUMAN    | -0.5061188 | 0.656254   |
| sp Q07075 AMPE_HUMAN    | -0.5038376 | 1.0485198  |
| sp Q9NVD7 PARVA_HUMAN   | -0.5024605 | 0.7827403  |
| sp Q32MZ4-3 LRRF1_HUMAN | -0.497015  | 0.7827403  |
| sp Q14956-2 GPNMB_HUMAN | -0.4906883 | 1.1932944  |
| sp Q8TD06 AGR3_HUMAN    | -0.4839592 | 1.1932944  |
| sp P28676 GRAN_HUMAN    | -0.4839382 | 1.1932944  |
| sp Q16822 PCKGM_HUMAN   | -0.464283  | 1.1932944  |
| sp P29972-2 AQP1_HUMAN  | -0.463192  | 1.1932944  |
| sp P33121-3 ACSL1_HUMAN | -0.4621334 | 1.0485198  |
| sp Q9UPQ0 LIMC1_HUMAN   | -0.4512787 | 0.65625405 |
| sp P10599-2 THIO_HUMAN  | -0.4511719 | 0.6298893  |
| sp P16403 H12_HUMAN     | -0.4468346 | 0          |
| sp P30049 ATPD_HUMAN    | -0.4359455 | 1.1932944  |
| sp Q6P4A8 PLBL1_HUMAN   | -0.4328232 | 0.8983557  |
| sp Q16836-3 HCDH_HUMAN  | -0.4220142 | 0.2178309  |
| sp P02462 CO4A1_HUMAN   | -0.419445  | 0.91601294 |
| sp Q9Y376 CAB39_HUMAN   | -0.416811  | 1.2773042  |
| sp Q53GQ0 DHB12_HUMAN   | -0.4128914 | 1.1505735  |
| sp P61916-2 NPC2_HUMAN  | -0.4101582 | 1.1932944  |
| sp O75323 NIPS2_HUMAN   | -0.3890457 | 1.1932944  |
| sp P52789 HXK2_HUMAN    | -0.3833809 | 0.656254   |

|                         |            |            |
|-------------------------|------------|------------|
| sp O15400-2 STX7_HUMAN  | -0.3751507 | 1.3006523  |
| sp P05141 ADT2_HUMAN    | -0.3730087 | 0.84879977 |
| sp P09493-5 TPM1_HUMAN  | -0.3656731 | 1.1932944  |
| sp Q07812-7 BAX_HUMAN   | -0.3610706 | 1.1932944  |
| sp Q9ULZ3-2 ASC_HUMAN   | -0.3588562 | 0.7827403  |
| sp Q9UBR2 CATZ_HUMAN    | -0.3559399 | 1.1932944  |
| sp Q8N335 GPD1L_HUMAN   | -0.3549767 | 0.5204253  |
| sp O60504-2 VINEX_HUMAN | -0.3538971 | 1.1791906  |
| sp Q6DN03 H2B2C_HUMAN   | -0.3506718 | 1.1932944  |
| sp Q7Z7H5-3 TMED4_HUMAN | -0.3497849 | 1.1932944  |
| sp Q13283 G3BP1_HUMAN   | -0.3474045 | 0.6070219  |
| sp P62834 RAP1A_HUMAN   | -0.3465195 | 0.656254   |
| sp Q8N684-3 CPSF7_HUMAN | -0.3429146 | 1.1932944  |
| sp P57088 TMM33_HUMAN   | -0.3418636 | 1.1932944  |
| sp P11717 MPRI_HUMAN    | -0.335989  | 1.1932944  |
| sp Q13938-4 CAYP1_HUMAN | -0.334919  | 0          |
| sp P45954-2 ACDSB_HUMAN | -0.3328743 | 1.1932944  |
| sp P11166 GTR1_HUMAN    | -0.3292885 | 1.1932944  |
| sp Q92930 RAB8B_HUMAN   | -0.3292084 | 0.656254   |
| sp P06396-2 GELS_HUMAN  | -0.3284798 | 0.656254   |
| sp O15296 LX15B_HUMAN   | -0.3269501 | 1.2095301  |
| sp P00740 FA9_HUMAN     | -0.3240032 | 1.1932944  |
| sp P06702 S10A9_HUMAN   | -0.3234787 | 1.2805575  |
| sp P62745 RHOB_HUMAN    | -0.3185463 | 0.656254   |
| sp P02794 FRIH_HUMAN    | -0.3166008 | 1.3006523  |
| sp Q9UUK9 NUDT5_HUMAN   | -0.3162594 | 1.1932944  |
| sp P0DPI2-2 GAL3A_HUMAN | -0.3143559 | 0.7061832  |
| sp Q9Y394-2 DHRS7_HUMAN | -0.3138447 | 1.0485198  |
| sp Q9NNW7 TRXR2_HUMAN   | -0.3117695 | 0.6298893  |
| sp P22307-8 NLTP_HUMAN  | -0.3102665 | 0.7061832  |
| sp Q92522 H1X_HUMAN     | -0.3070889 | 0.45033538 |
| sp P29992 GNA11_HUMAN   | -0.3059158 | 1.1932944  |
| sp P61956-2 SUMO2_HUMAN | -0.3058548 | 0.656254   |
| sp O95833 CLIC3_HUMAN   | -0.2999783 | 0.7061832  |
| sp Q86Y82 STX12_HUMAN   | -0.2991276 | 1.3006523  |
| sp P69891 HBG1_HUMAN    | -0.2987309 | 0.656254   |
| sp P07954-2 FUMH_HUMAN  | -0.2981339 | 1.0634323  |
| sp O00483 NDUA4_HUMAN   | -0.2944012 | 1.1932944  |
| sp P78417-3 GSTO1_HUMAN | -0.2861843 | 0.7827403  |
| sp Q9NUB1-2 ACS2L_HUMAN | -0.2843056 | 0.7827403  |
| sp O00186 STXB3_HUMAN   | -0.2841625 | 0.45033538 |
| sp Q8NBX0 SCPDL_HUMAN   | -0.2840042 | 1.2773042  |
| sp P63096 GNAI1_HUMAN   | -0.2818565 | 1.1505735  |
| sp P09601 HMOX1_HUMAN   | -0.277462  | 0.7588735  |
| sp Q15056-2 IF4H_HUMAN  | -0.2769585 | 0.7827403  |

|                         |            |            |
|-------------------------|------------|------------|
| sp P62070-4 RRAS2_HUMAN | -0.2692165 | 0.656254   |
| sp P15559-2 NQO1_HUMAN  | -0.266222  | 1.1932944  |
| sp Q9NZK5 ADA2_HUMAN    | -0.2661934 | 0.7827403  |
| sp P51636-2 CAV2_HUMAN  | -0.2661018 | 1.1932944  |
| sp P10619-2 PPGB_HUMAN  | -0.2650528 | 0.6070219  |
| sp P06753-2 TPM3_HUMAN  | -0.2645645 | 1.1932944  |
| sp P07948-2 LYN_HUMAN   | -0.2641106 | 1.1932944  |
| sp P25685-2 DNJB1_HUMAN | -0.2640648 | 1.1932944  |
| sp Q13813-3 SPTN1_HUMAN | -0.2621231 | 0.7827403  |
| sp Q16787-3 LAMA3_HUMAN | -0.2618942 | 0.656254   |
| sp O95197-2 RTN3_HUMAN  | -0.2593765 | 1.1932944  |
| sp P11279 LAMP1_HUMAN   | -0.2590313 | 0.45033538 |
| sp P10412 H14_HUMAN     | -0.2583695 | 0          |
| sp P06239-3 LCK_HUMAN   | -0.2564507 | 0.656254   |
| sp P26368-2 U2AF2_HUMAN | -0.2558193 | 1.1932944  |
| sp P12236 ADT3_HUMAN    | -0.2554035 | 1.1932944  |
| sp Q06136 KDSR_HUMAN    | -0.2553501 | 1.1932944  |
| sp P31947 1433S_HUMAN   | -0.2546768 | 1.2095301  |
| sp Q9Y5S9-2 RBM8A_HUMAN | -0.2542372 | 0.2178309  |
| sp P61586 RHOA_HUMAN    | -0.2525559 | 1.1932944  |
| sp P02749 APOH_HUMAN    | -0.2522049 | 0.23973103 |
| sp P29400-2 CO4A5_HUMAN | -0.2473364 | 0.656254   |
| sp Q92542 NICA_HUMAN    | -0.2469273 | 1.1505735  |
| sp Q9NP72 RAB18_HUMAN   | -0.2454052 | 1.0485198  |
| sp P14866-2 HNRPL_HUMAN | -0.2419987 | 1.1505735  |
| sp Q92769 HDAC2_HUMAN   | -0.2412472 | 0.656254   |
| sp P48059-3 LIMS1_HUMAN | -0.2395668 | 0.656254   |
| sp P15153 RAC2_HUMAN    | -0.2393036 | 0.656254   |
| sp P11234-2 RALB_HUMAN  | -0.2353172 | 0.656254   |
| sp Q13884 SNTB1_HUMAN   | -0.2346668 | 0.19149946 |
| sp P62937 PPIA_HUMAN    | -0.2326107 | 0.7061832  |
| sp O00712-4 NFIB_HUMAN  | -0.2323837 | 0.656254   |
| sp Q02978-2 M2OM_HUMAN  | -0.2321529 | 0.7061832  |
| sp P63092-3 GNAS2_HUMAN | -0.2309876 | 1.0634323  |
| sp P08631-2 HCK_HUMAN   | -0.2304287 | 0.656254   |
| sp PODJI8 SAA1_HUMAN    | -0.2288914 | 0.45033538 |
| sp Q08431 MFGM_HUMAN    | -0.2264481 | 0.91601294 |
| sp Q7Z4W1 DCXR_HUMAN    | -0.224781  | 1.2941489  |
| sp P08962-2 CD63_HUMAN  | -0.2241116 | 1.1932944  |
| sp P30838 AL3A1_HUMAN   | -0.2211876 | 1.1932944  |
| sp O60271-4 JIP4_HUMAN  | -0.2198963 | 0.35795313 |
| sp Q53T59 H1BP3_HUMAN   | -0.2198544 | 1.1932944  |
| sp P12235 ADT1_HUMAN    | -0.2194901 | 0.656254   |
| sp P30626-2 SORCN_HUMAN | -0.2190437 | 0.9968222  |
| sp P60953 CDC42_HUMAN   | -0.217598  | 1.214352   |



|                         |            |            |
|-------------------------|------------|------------|
| sp P02746 C1QB_HUMAN    | -0.2163715 | 0.19149946 |
| sp O76003 GLRX3_HUMAN   | -0.2138844 | 0.656254   |
| sp P51153 RAB13_HUMAN   | -0.213274  | 0.656254   |
| sp P21964-2 COMT_HUMAN  | -0.2127342 | 0.7759099  |
| sp P09429 HMGB1_HUMAN   | -0.2124062 | 1.1932944  |
| sp Q6IAA8 LTOR1_HUMAN   | -0.211792  | 1.1932944  |
| sp P52788-2 SPSY_HUMAN  | -0.2112789 | 0.7827403  |
| sp P29350-3 PTN6_HUMAN  | -0.2065773 | 1.3006523  |
| sp Q96RQ3 MCCA_HUMAN    | -0.2057762 | 0.6298893  |
| sp Q9BZF9-2 UACA_HUMAN  | -0.2011404 | 0.19149946 |
| sp P09417-2 DHPR_HUMAN  | -0.201004  | 0.19149946 |
| sp Q9NYL9 TMOD3_HUMAN   | -0.1977615 | 0.30372584 |
| sp Q9UGI8-2 TES_HUMAN   | -0.1959992 | 1.2954973  |
| sp Q9Y3D6 FIS1_HUMAN    | -0.1959915 | 0.7061832  |
| sp O15511 ARPC5_HUMAN   | -0.1945438 | 0.40256184 |
| sp Q9H8H3 MET7A_HUMAN   | -0.19454   | 0.2178309  |
| sp P15311 EZRI_HUMAN    | -0.1936665 | 0.3664326  |
| sp O15143 ARC1B_HUMAN   | -0.192049  | 1.0076748  |
| sp P61006 RAB8A_HUMAN   | -0.1918068 | 1.1932944  |
| sp Q00325-2 MPCP_HUMAN  | -0.1916618 | 1.0801278  |
| sp Q9BW30 TPPP3_HUMAN   | -0.1900234 | 0.7217418  |
| sp Q6NY19-2 KANK3_HUMAN | -0.1893435 | 1.1932944  |
| sp O00391 QSOX1_HUMAN   | -0.1877213 | 1.1932944  |
| sp P35754 GLRX1_HUMAN   | -0.1856155 | 0.7498006  |
| sp P04222 1C03_HUMAN    | -0.1854057 | 0          |
| sp Q86TX2 ACOT1_HUMAN   | -0.1840019 | 0.656254   |
| sp P28482 MK01_HUMAN    | -0.1826344 | 1.1791906  |
| sp P42167 LAP2B_HUMAN   | -0.1817761 | 1.1932944  |
| sp P51991-2 ROA3_HUMAN  | -0.1808529 | 0.656254   |
| sp P68371 TBB4B_HUMAN   | -0.1786995 | 0          |
| sp P63220 RS21_HUMAN    | -0.1783333 | 1.1932944  |
| sp Q14019 COTL1_HUMAN   | -0.1780624 | 1.3006523  |
| sp Q10713 MPPA_HUMAN    | -0.1779327 | 0.48520416 |
| sp P13987-2 CD59_HUMAN  | -0.1771298 | 0.35795313 |
| sp Q92688-2 AN32B_HUMAN | -0.1770287 | 1.1505735  |
| sp P62263 RS14_HUMAN    | -0.1758843 | 0.7061832  |
| sp P51649-2 SSDH_HUMAN  | -0.1735516 | 1.0485198  |
| sp Q15185-3 TEBP_HUMAN  | -0.1718864 | 0.45033538 |
| sp P53597 SUCA_HUMAN    | -0.1715469 | 0.7061832  |
| sp Q9UBV8 PEF1_HUMAN    | -0.1676807 | 0.7061832  |
| sp P35270 SPRE_HUMAN    | -0.1676788 | 0.7498006  |
| sp P04839 CY24B_HUMAN   | -0.1676426 | 0.7827403  |
| sp P58107 EPIPL_HUMAN   | -0.1673594 | 0.98032326 |
| sp Q9HC35-2 EMAL4_HUMAN | -0.1654797 | 0.84879977 |
| sp P62942 FKB1A_HUMAN   | -0.1652355 | 0.656254   |

|                         |            |            |
|-------------------------|------------|------------|
| sp Q9UDY2-3 ZO2_HUMAN   | -0.163496  | 1.1932944  |
| sp P31946-2 1433B_HUMAN | -0.1625366 | 0.656254   |
| sp P30566 PUR8_HUMAN    | -0.1617203 | 0.656254   |
| sp Q03154-4 ACY1_HUMAN  | -0.1615448 | 0.7061832  |
| sp P63000-2 RAC1_HUMAN  | -0.161396  | 0.35795313 |
| sp Q15833-2 STXB2_HUMAN | -0.1613522 | 0.19149946 |
| sp P07305-2 H10_HUMAN   | -0.1610603 | 0.1558116  |
| sp Q96EP5-2 DAZP1_HUMAN | -0.1608219 | 0.45033538 |
| sp P08559-2 ODPA_HUMAN  | -0.1605473 | 0.5886828  |
| sp O75608-2 LYPA1_HUMAN | -0.1600056 | 1.1932944  |
| sp P62879 GBB2_HUMAN    | -0.1586113 | 0.40256184 |
| sp P42126-2 ECI1_HUMAN  | -0.1578217 | 1.1932944  |
| sp Q86U42-2 PABP2_HUMAN | -0.1578064 | 0.656254   |
| sp P35908 K22E_HUMAN    | -0.1570816 | 0.7740364  |
| sp Q15181 IPYR_HUMAN    | -0.1569786 | 0.30372584 |
| sp P04217 A1BG_HUMAN    | -0.1550922 | 1.1895121  |
| sp Q14254 FLOT2_HUMAN   | -0.1550598 | 0.7217418  |
| sp P09651-3 ROA1_HUMAN  | -0.1545811 | 0.80804527 |
| sp P09211 GSTP1_HUMAN   | -0.1543999 | 0.08684197 |
| sp P29466-2 CASP1_HUMAN | -0.152626  | 0.656254   |
| sp P63261 ACTG_HUMAN    | -0.1507282 | 0          |
| sp Q9P0L0-2 VAPA_HUMAN  | -0.1500397 | 1.214352   |
| sp P61204 ARF3_HUMAN    | -0.1494961 | 1.0634323  |
| sp Q16630-2 CPSF6_HUMAN | -0.1469078 | 0.2178309  |
| sp P01920 DQB1_HUMAN    | -0.145792  | 0.7827403  |
| sp Q9UMS4 PRP19_HUMAN   | -0.14571   | 1.1240381  |
| sp P60983 GMFB_HUMAN    | -0.1456051 | 1.1505735  |
| sp Q86W92-2 LIPB1_HUMAN | -0.1451817 | 0.45033538 |
| sp Q969X5-2 ERGI1_HUMAN | -0.1436367 | 0.91601294 |
| sp P53004 BIEA_HUMAN    | -0.1435127 | 0.70235044 |
| sp P24539 AT5F1_HUMAN   | -0.1435108 | 0.3852666  |
| sp P78417-2 GSTO1_HUMAN | -0.143261  | 0.656254   |
| sp P19367-2 HXK1_HUMAN  | -0.1431255 | 0.68352973 |
| sp Q9P2R7-2 SUCB1_HUMAN | -0.1426697 | 1.1240381  |
| sp P49593-2 PPM1F_HUMAN | -0.142581  | 1.0485198  |
| sp P06865 HEXA_HUMAN    | -0.1420288 | 0.43633315 |
| sp P58546 MTPN_HUMAN    | -0.1418476 | 0.5204253  |
| sp O15145 ARPC3_HUMAN   | -0.1415844 | 1.1505735  |
| sp Q9UQ80 PA2G4_HUMAN   | -0.1398811 | 0          |
| sp P07203 GPX1_HUMAN    | -0.1395035 | 0.2591514  |
| sp P52272-2 HNRPM_HUMAN | -0.1391411 | 0.92609    |
| sp O95716 RAB3D_HUMAN   | -0.1389542 | 0.656254   |
| sp P06733 ENOA_HUMAN    | -0.1366272 | 0.79965526 |
| sp Q27J81-2 INF2_HUMAN  | -0.1364479 | 0.04707252 |
| sp P62826 RAN_HUMAN     | -0.1359272 | 0.7957244  |

|                           |            |            |
|---------------------------|------------|------------|
| sp P54727 RD23B_HUMAN     | -0.1358814 | 1.1505735  |
| sp P62906 RL10A_HUMAN     | -0.1355286 | 1.0370445  |
| sp P02751-15 FINC_HUMAN   | -0.1352348 | 0.656254   |
| sp Q9NX63 MIC19_HUMAN     | -0.1345177 | 0.45033538 |
| sp P63010-2 AP2B1_HUMAN   | -0.1341934 | 0.7957244  |
| sp O15127 SCAM2_HUMAN     | -0.1339932 | 0.7061832  |
| sp P37802 TAGL2_HUMAN     | -0.1325092 | 0.7604814  |
| sp Q9UBQ5 EIF3K_HUMAN     | -0.1314697 | 0.45033538 |
| sp P07360 CO8G_HUMAN      | -0.1306877 | 0.7827403  |
| sp Q9BWD1 THIC_HUMAN      | -0.1304359 | 0.45033538 |
| sp P48681 NEST_HUMAN      | -0.1303425 | 0.9943782  |
| sp P30466 1B18_HUMAN      | -0.1303062 | 0.656254   |
| sp P33316 DUT_HUMAN       | -0.1302338 | 1.1932944  |
| sp P53007 TXTP_HUMAN      | -0.1298752 | 0.84879977 |
| sp P36542-2 ATPG_HUMAN    | -0.1291056 | 0          |
| sp P04424-2 ARLY_HUMAN    | -0.1289539 | 0.68888646 |
| sp O94811 TPPP_HUMAN      | -0.1277542 | 0.45033538 |
| sp P46108 CRK_HUMAN       | -0.1268578 | 0.9533461  |
| sp P61758 PFD3_HUMAN      | -0.1266956 | 0.7827403  |
| sp P52790 HXK3_HUMAN      | -0.1261158 | 0.48520416 |
| sp Q9NZL9 MAT2B_HUMAN     | -0.1241074 | 1.1276597  |
| sp P61088 UBE2N_HUMAN     | -0.1229248 | 0.19149946 |
| sp Q9H0W9-2 CK054_HUMAN   | -0.1227112 | 0.90036625 |
| sp P16157-21 ANK1_HUMAN   | -0.1226025 | 1.120602   |
| sp O95994 AGR2_HUMAN      | -0.1214485 | 0.6115017  |
| sp O00231-2 PSD11_HUMAN   | -0.1206017 | 0.6298893  |
| sp Q15233 NONO_HUMAN      | -0.1199627 | 1.1054204  |
| sp Q07955-3 SRSF1_HUMAN   | -0.1190777 | 0.7022581  |
| sp P98082-2 DAB2_HUMAN    | -0.118824  | 1.1932944  |
| sp Q04760-2 LGUL_HUMAN    | -0.118763  | 0.35193655 |
| sp Q9H2G2-2 SLK_HUMAN     | -0.1180744 | 0          |
| sp O14791-2 APOL1_HUMAN   | -0.1177902 | 1.1932944  |
| sp Q9HC38 GLOD4_HUMAN     | -0.1176682 | 0.19410844 |
| sp P08754 GNAI3_HUMAN     | -0.1175327 | 0.21439649 |
| sp P54577 SYYC_HUMAN      | -0.1172314 | 1.1505735  |
| sp P42285 MTREX_HUMAN     | -0.1170683 | 0.19149946 |
| sp P31946 1433B_HUMAN     | -0.1170654 | 0.656254   |
| sp P52566 GDIR2_HUMAN     | -0.1168938 | 1.0370445  |
| sp POC0S5 H2AZ_HUMAN      | -0.1168327 | 0          |
| sp P13284 GILT_HUMAN      | -0.1167755 | 0.7061832  |
| sp Q96MM6 HS12B_HUMAN     | -0.1164475 | 0.06986027 |
| sp P11387 TOP1_HUMAN      | -0.1160851 | 0.19149946 |
| sp A0A0C4DH31 HV118_HUMAN | -0.1152687 | 0.656254   |
| sp P25788-2 PSA3_HUMAN    | -0.1143723 | 1.1791906  |
| sp Q13451 FKBP5_HUMAN     | -0.1140347 | 1.0076748  |

|                         |            |            |
|-------------------------|------------|------------|
| sp P28066 PSA5_HUMAN    | -0.1140213 | 1.1791906  |
| sp P50570-2 DYN2_HUMAN  | -0.1139145 | 1.1240381  |
| sp P62304 RUXE_HUMAN    | -0.113884  | 0.45033538 |
| sp B5ME19 EIFCL_HUMAN   | -0.1137829 | 0.91601294 |
| sp O60825-2 F262_HUMAN  | -0.1137791 | 0.656254   |
| sp P15121 ALDR_HUMAN    | -0.1134338 | 0.28377196 |
| sp P35268 RL22_HUMAN    | -0.1128674 | 0.7061832  |
| sp O75874 IDHC_HUMAN    | -0.1124954 | 0.694615   |
| sp Q16629-2 SRSF7_HUMAN | -0.1123314 | 0.1342476  |
| sp P0DMV9 HS71B_HUMAN   | -0.1119881 | 0.7687336  |
| sp Q5JPE7-2 NOMO2_HUMAN | -0.1111984 | 0.35795313 |
| sp P53634 CATC_HUMAN    | -0.1099701 | 0.09894868 |
| sp Q13308-6 PTK7_HUMAN  | -0.1095448 | 1.0485198  |
| sp Q9UNF0-2 PACN2_HUMAN | -0.1090317 | 0.84879977 |
| sp P48509 CD151_HUMAN   | -0.1081238 | 0.45033538 |
| sp O75436 VP26A_HUMAN   | -0.1075745 | 0.7498006  |
| sp O75347 TBCA_HUMAN    | -0.1070881 | 0.7061832  |
| sp P18077 RL35A_HUMAN   | -0.1067886 | 0.40256184 |
| sp O60749 SNX2_HUMAN    | -0.10672   | 0.8339981  |
| sp O00299 CLIC1_HUMAN   | -0.1056786 | 0.26737198 |
| sp Q96HD1 CREL1_HUMAN   | -0.1053982 | 0.45033538 |
| sp Q15717-2 ELAV1_HUMAN | -0.1041279 | 0.7061832  |
| sp Q9NUQ9 FA49B_HUMAN   | -0.1032372 | 0.35795313 |
| sp Q9UI12-2 VATH_HUMAN  | -0.103199  | 0.84879977 |
| sp P30519 HMOX2_HUMAN   | -0.103035  | 0.19149946 |
| sp Q14118 DAG1_HUMAN    | -0.1027203 | 0.09894868 |
| sp O43681 ASNA_HUMAN    | -0.1021805 | 0.09894868 |
| sp P61225 RAP2B_HUMAN   | -0.1021709 | 0.7827403  |
| sp Q92841-3 DDX17_HUMAN | -0.1016274 | 0.25398457 |
| sp Q9NZM1-6 MYOF_HUMAN  | -0.1002102 | 0.22836551 |
| sp Q16881-2 TRXR1_HUMAN | -0.0990295 | 0.65625405 |
| sp Q92905 CSN5_HUMAN    | -0.0989533 | 0          |
| sp Q96HE7 ERO1A_HUMAN   | -0.0988007 | 0.91601294 |
| sp Q13813-2 SPTN1_HUMAN | -0.0983734 | 0.19149946 |
| sp Q13177 PAK2_HUMAN    | -0.0980644 | 0.45033538 |
| sp Q9BVC6 TM109_HUMAN   | -0.0979576 | 0.09894868 |
| sp O14950 ML12B_HUMAN   | -0.0974922 | 0.7588735  |
| sp P23497 SP100_HUMAN   | -0.0965347 | 0.7827403  |
| sp Q9Y2Q5 LTOR2_HUMAN   | -0.0964394 | 0          |
| sp O60814 H2B1K_HUMAN   | -0.09622   | 0          |
| sp P07858 CATB_HUMAN    | -0.0958443 | 0.7827403  |
| sp P48449-3 ERG7_HUMAN  | -0.0957089 | 0.40256184 |
| sp Q10567-2 AP1B1_HUMAN | -0.0949135 | 0.09894868 |
| sp Q9HAV0 GBB4_HUMAN    | -0.0945149 | 0.35795313 |
| sp P49411 EFTU_HUMAN    | -0.0935936 | 1.2203159  |

|                          |            |            |
|--------------------------|------------|------------|
| sp P02768 ALBU_HUMAN     | -0.0935249 | 0.06678823 |
| sp P60033 CD81_HUMAN     | -0.0935249 | 0.45033538 |
| sp P20674 COX5A_HUMAN    | -0.0928268 | 0.35795313 |
| sp O43747-2 AP1G1_HUMAN  | -0.0926857 | 0.69308156 |
| sp P50452 SPB8_HUMAN     | -0.0926743 | 0.45033538 |
| sp P47755 CAZA2_HUMAN    | -0.092514  | 1.0242546  |
| sp O75947-2 ATP5H_HUMAN  | -0.091856  | 0.7217418  |
| sp Q96C23 GALM_HUMAN     | -0.0918427 | 0          |
| sp Q5R3I4 TTC38_HUMAN    | -0.0910559 | 0.45033538 |
| sp P00403 COX2_HUMAN     | -0.0908966 | 0.30372584 |
| sp P36776-3 LONM_HUMAN   | -0.0906334 | 1.1791906  |
| sp Q9H2D6-2 TARA_HUMAN   | -0.090229  | 0.43103603 |
| sp O75340-2 PDCD6_HUMAN  | -0.0898037 | 0.2178309  |
| sp Q9UH99-3 SUN2_HUMAN   | -0.0896778 | 0          |
| sp Q8WUM4 PDC6I_HUMAN    | -0.0895557 | 0.8068939  |
| sp P49756 RBM25_HUMAN    | -0.0893898 | 0.35795313 |
| sp P08575-10 PTPRC_HUMAN | -0.0892601 | 1.3006523  |
| sp P61020 RAB5B_HUMAN    | -0.0889206 | 0.35795313 |
| sp P48163-2 MAOX_HUMAN   | -0.0887032 | 0.5204253  |
| sp O43813 LANC1_HUMAN    | -0.0886879 | 0.35795313 |
| sp Q13347 EIF3I_HUMAN    | -0.0886688 | 0          |
| sp O43390-2 HNRPR_HUMAN  | -0.088604  | 0.49383867 |
| sp Q9NSE4 SYIM_HUMAN     | -0.0884571 | 0.37060758 |
| sp P61160 ARP2_HUMAN     | -0.0884438 | 0.7827403  |
| sp Q9BR76 COR1B_HUMAN    | -0.088131  | 0.0846519  |
| sp P23946 CMA1_HUMAN     | -0.0880203 | 0.33495146 |
| sp Q99623 PHB2_HUMAN     | -0.0877876 | 0.6262363  |
| sp Q9BRA2 TXD17_HUMAN    | -0.0875015 | 0.6298893  |
| sp P29218 IMPA1_HUMAN    | -0.0864697 | 1.0992733  |
| sp Q9Y6A4 CFA20_HUMAN    | -0.0863152 | 0.19149946 |
| sp Q96DG6 CMBL_HUMAN     | -0.0855045 | 0.7061832  |
| sp P30085 KCY_HUMAN      | -0.0853329 | 0.91601294 |
| sp Q9NZB2-6 F120A_HUMAN  | -0.084465  | 0.6070219  |
| sp P20618 PSB1_HUMAN     | -0.0839424 | 1.2064548  |
| sp P63027 VAMP2_HUMAN    | -0.0838299 | 0.19149946 |
| sp P01112 RASH_HUMAN     | -0.083725  | 0          |
| sp P42330 AK1C3_HUMAN    | -0.0830498 | 0.68888646 |
| sp P61353 RL27_HUMAN     | -0.0829582 | 0.7827403  |
| sp P08621-3 RU17_HUMAN   | -0.0827694 | 0.48520416 |
| sp Q15393 SF3B3_HUMAN    | -0.0826454 | 0.5832693  |
| sp Q9UPN3 MACF1_HUMAN    | -0.0822964 | 0.37554002 |
| sp O75131 CPNE3_HUMAN    | -0.0821877 | 0.46889037 |
| sp Q99538-2 LGMN_HUMAN   | -0.0814867 | 0.19149946 |
| sp Q96KP4 CNDP2_HUMAN    | -0.0808411 | 0.9735724  |
| sp P02753 RET4_HUMAN     | -0.0808086 | 0.5204253  |

|                         |            |            |
|-------------------------|------------|------------|
| sp P51991 ROA3_HUMAN    | -0.0803766 | 0.1342476  |
| sp P52597 HNRPF_HUMAN   | -0.0800953 | 0.06986027 |
| sp O95571 ETHE1_HUMAN   | -0.0794792 | 0.95332193 |
| sp Q92888-2 ARHG1_HUMAN | -0.0793495 | 0.1558116  |
| sp Q13217 DNJC3_HUMAN   | -0.0791626 | 0.6298893  |
| sp Q9NZU5-2 LMCD1_HUMAN | -0.0788631 | 0.32654193 |
| sp P43652 AFAM_HUMAN    | -0.0787449 | 0.25634286 |
| sp Q14165 MLEC_HUMAN    | -0.0770035 | 0.91601294 |
| sp P40763-3 STAT3_HUMAN | -0.0761776 | 0          |
| sp P31937 3HIDH_HUMAN   | -0.0758228 | 0.2178309  |
| sp P02747 C1QC_HUMAN    | -0.0753136 | 0.45033538 |
| sp P30050 RL12_HUMAN    | -0.0750847 | 0.06291623 |
| sp Q9UJS0-2 CMC2_HUMAN  | -0.0741615 | 0.19149946 |
| sp P02774-3 VTDB_HUMAN  | -0.0732918 | 0.98237437 |
| sp P17612 KAPCA_HUMAN   | -0.0730276 | 0.8983557  |
| sp Q86UX7-2 URP2_HUMAN  | -0.0728245 | 0.62912476 |
| sp Q13045-2 FLII_HUMAN  | -0.0721798 | 0.09339783 |
| sp P29590 PML_HUMAN     | -0.07164   | 0.35795313 |
| sp P60842 IF4A1_HUMAN   | -0.0710335 | 0.29781067 |
| sp Q01130-2 SRSF2_HUMAN | -0.0692883 | 0.35795313 |
| sp Q06033-2 ITIH3_HUMAN | -0.0692368 | 0.45033538 |
| sp E9PAV3 NACAM_HUMAN   | -0.0692081 | 0          |
| sp P53396-2 ACLY_HUMAN  | -0.0689735 | 0.01343579 |
| sp P55084 ECHB_HUMAN    | -0.0684109 | 0.5176613  |
| sp Q99439 CNN2_HUMAN    | -0.0682907 | 0.52598757 |
| sp Q02818 NUCB1_HUMAN   | -0.0679588 | 1.0848553  |
| sp P22033 MUTA_HUMAN    | -0.0679073 | 0.09894868 |
| sp P25789 PSA4_HUMAN    | -0.0678654 | 0.5176613  |
| sp P61081 UBC12_HUMAN   | -0.0677776 | 0.48520416 |
| sp O60256-3 KPRB_HUMAN  | -0.0675793 | 0          |
| sp O95865 DDAH2_HUMAN   | -0.0672646 | 0.4668234  |
| sp O43615 TIM44_HUMAN   | -0.0667868 | 0.45033538 |
| sp P23284 PIIB_HUMAN    | -0.0663891 | 0.6255959  |
| sp Q9H299 SH3L3_HUMAN   | -0.0649128 | 0.7827403  |
| sp Q13492-2 PICAL_HUMAN | -0.0645027 | 0.2178309  |
| sp Q9Y3A5 SBDS_HUMAN    | -0.0637817 | 0.56808305 |
| sp Q99714 HCD2_HUMAN    | -0.0633144 | 1.1701994  |
| sp P61163 ACTZ_HUMAN    | -0.0629177 | 0.30372584 |
| sp P13861 KAP2_HUMAN    | -0.0622692 | 0.45876312 |
| sp Q96QK1 VPS35_HUMAN   | -0.0614777 | 0.07727676 |
| sp P02766 TTHY_HUMAN    | -0.0605965 | 0.6298893  |
| sp P07357 CO8A_HUMAN    | -0.0604153 | 0          |
| sp P46926 GNPI1_HUMAN   | -0.0596008 | 0.21439649 |
| sp Q9BT78 CSN4_HUMAN    | -0.0594711 | 0.30372584 |
| sp Q9NUJ1-3 ABHDA_HUMAN | -0.0594635 | 0.19149946 |

|                         |            |            |
|-------------------------|------------|------------|
| sp P24557-2 THAS_HUMAN  | -0.059103  | 0          |
| sp P26196 DDX6_HUMAN    | -0.0588417 | 0.09894868 |
| sp P62314 SMD1_HUMAN    | -0.0586605 | 0          |
| sp Q9P258 RCC2_HUMAN    | -0.0581379 | 0.7588735  |
| sp Q13363-2 CTBP1_HUMAN | -0.0580483 | 0.19149946 |
| sp P46940 IQGA1_HUMAN   | -0.0575256 | 0.32928494 |
| sp P62081 RS7_HUMAN     | -0.0575161 | 0.04707252 |
| sp Q14152 EIF3A_HUMAN   | -0.0573874 | 0.09894868 |
| sp P46939-2 UTRO_HUMAN  | -0.0572643 | 1.2669417  |
| sp Q969G5 CAVN3_HUMAN   | -0.057045  | 0.35795313 |
| sp Q92973-2 TNPO1_HUMAN | -0.0568047 | 0.5111962  |
| sp P01019 ANGT_HUMAN    | -0.0564232 | 0.5111962  |
| sp O43684-2 BUB3_HUMAN  | -0.0559635 | 0.7827403  |
| sp P63151-2 2ABA_HUMAN  | -0.0543289 | 0.312067   |
| sp Q9Y383-3 LC7L2_HUMAN | -0.0533829 | 0.5204253  |
| sp Q9BSJ8-2 ESYT1_HUMAN | -0.0528889 | 0.53847194 |
| sp P25311 ZA2G_HUMAN    | -0.0516529 | 0.17511293 |
| sp Q16658 FSCN1_HUMAN   | -0.0514832 | 0.6073585  |
| sp P18085 ARF4_HUMAN    | -0.0509453 | 0.656254   |
| sp P31150 GDIA_HUMAN    | -0.0507813 | 0.3516469  |
| sp Q13232 NDK3_HUMAN    | -0.0501213 | 0.21439649 |
| sp P47756-2 CAPZB_HUMAN | -0.0500183 | 0.79939914 |
| sp Q6WCQ1-2 MPRIP_HUMAN | -0.0495777 | 0.14672586 |
| sp Q96S97 MYADM_HUMAN   | -0.0489998 | 0          |
| sp Q96C19 EFHD2_HUMAN   | -0.0482101 | 0.35795313 |
| sp P19338 NUCL_HUMAN    | -0.0481396 | 0.24485865 |
| sp Q9UN86-2 G3BP2_HUMAN | -0.0480766 | 0          |
| sp P28074 PSB5_HUMAN    | -0.0478649 | 0.4075265  |
| sp Q9Y3B3 TMED7_HUMAN   | -0.0478058 | 0.19149946 |
| sp Q16891-2 MIC60_HUMAN | -0.047718  | 0.12054814 |
| sp Q9ULV4-3 COR1C_HUMAN | -0.0467587 | 0.02662771 |
| sp Q9Y305-4 ACOT9_HUMAN | -0.0466328 | 0          |
| sp P61457 PHS_HUMAN     | -0.0453148 | 0.19149946 |
| sp P27635 RL10_HUMAN    | -0.0452824 | 0          |
| sp O75915 PRAF3_HUMAN   | -0.0452051 | 0.2178309  |
| sp P20339-2 RAB5A_HUMAN | -0.0448065 | 0          |
| sp O75396 SC22B_HUMAN   | -0.044344  | 0.51870745 |
| sp P61158 ARP3_HUMAN    | -0.0439873 | 0.4685232  |
| sp P40306 PSB10_HUMAN   | -0.0435944 | 0.45563722 |
| sp Q15404 RSU1_HUMAN    | -0.0429096 | 0.656254   |
| sp O75964 ATP5L_HUMAN   | -0.0427208 | 0.19149946 |
| sp P61313 RL15_HUMAN    | -0.0424709 | 0          |
| sp P39687 AN32A_HUMAN   | -0.0420475 | 0.09894868 |
| sp P05155-2 IC1_HUMAN   | -0.0418358 | 0          |
| sp P28062 PSB8_HUMAN    | -0.0411339 | 0.03043297 |

|                          |            |            |
|--------------------------|------------|------------|
| sp P62495-2 ERF1_HUMAN   | -0.0404701 | 0.09894868 |
| sp Q9BQE3 TBA1C_HUMAN    | -0.040062  | 0          |
| sp O60716-14 CTND1_HUMAN | -0.0400391 | 0.2178309  |
| sp P25786-2 PSA1_HUMAN   | -0.0399895 | 0.46799397 |
| sp P16930 FAAA_HUMAN     | -0.0399704 | 0          |
| sp Q5EBM0 CMPK2_HUMAN    | -0.0398598 | 0          |
| sp Q13423 NNTM_HUMAN     | -0.0397606 | 0.4075265  |
| sp P07737 PROF1_HUMAN    | -0.0391426 | 0.43193293 |
| sp Q92556 ELMO1_HUMAN    | -0.0386887 | 0.06291623 |
| sp P49458 SRP09_HUMAN    | -0.0385628 | 0          |
| sp Q15257-2 PTPA_HUMAN   | -0.0384178 | 0.33495146 |
| sp Q9BTV4 TMM43_HUMAN    | -0.0382252 | 0.14672586 |
| sp Q99961-3 SH3G1_HUMAN  | -0.0380516 | 0          |
| sp Q6UW68 TM205_HUMAN    | -0.0374908 | 0.19149946 |
| sp O75643 U520_HUMAN     | -0.0368099 | 0.28516325 |
| sp Q9Y224 RTRAF_HUMAN    | -0.0366421 | 0.33495146 |
| sp P51553-2 IDH3G_HUMAN  | -0.0366077 | 0.312067   |
| sp Q96CX2 KCD12_HUMAN    | -0.0364475 | 0.25398457 |
| sp P38919 IF4A3_HUMAN    | -0.0350685 | 0.0846519  |
| sp Q9P0V9-2 SEP10_HUMAN  | -0.0350018 | 0          |
| sp P30101 PDIA3_HUMAN    | -0.034729  | 0.33077648 |
| sp Q13724-2 MOGS_HUMAN   | -0.0344543 | 0.12897664 |
| sp P30084 ECHM_HUMAN     | -0.034339  | 0.20467198 |
| sp P09496-2 CLCA_HUMAN   | -0.0336075 | 0.7588735  |
| sp P09382 LEG1_HUMAN     | -0.0329819 | 0.12026574 |
| sp P16152 CBR1_HUMAN     | -0.0325584 | 0.07727676 |
| sp Q9NZ32 ARP10_HUMAN    | -0.0322304 | 0.45033538 |
| sp Q16539-2 MK14_HUMAN   | -0.0308666 | 0          |
| sp P60900 PSA6_HUMAN     | -0.0307159 | 0.19102953 |
| sp P43034 LIS1_HUMAN     | -0.0305157 | 0.08891098 |
| sp O15173-2 PGRC2_HUMAN  | -0.0305138 | 0.06291623 |
| sp P36551 HEM6_HUMAN     | -0.0302429 | 0.45033538 |
| sp O14773 TPP1_HUMAN     | -0.0296345 | 0.06291623 |
| sp Q15365 PCBP1_HUMAN    | -0.0295448 | 0.19410844 |
| sp Q9GZP4-2 PITH1_HUMAN  | -0.0295048 | 0          |
| sp Q96CW1-2 AP2M1_HUMAN  | -0.0291405 | 0.21439649 |
| sp Q99497 PARK7_HUMAN    | -0.0291328 | 0.52598757 |
| sp P31321 KAP1_HUMAN     | -0.029089  | 0          |
| sp P11171-7 41_HUMAN     | -0.0288239 | 0.21439649 |
| sp P12694 ODBA_HUMAN     | -0.0278969 | 0.09894868 |
| sp Q08945 SSRP1_HUMAN    | -0.0274086 | 0.20467198 |
| sp P46781 RS9_HUMAN      | -0.0269623 | 0.1500082  |
| sp Q15149-3 PLEC_HUMAN   | -0.0269165 | 0          |
| sp P43121 MUC18_HUMAN    | -0.0268841 | 0.3005443  |
| sp P40939 ECHA_HUMAN     | -0.0267239 | 0.7192765  |



|                         |            |            |
|-------------------------|------------|------------|
| sp P27824-2 CALX_HUMAN  | -0.0265045 | 0.24295025 |
| sp P23193-2 TCEA1_HUMAN | -0.026474  | 0.04707252 |
| sp P04440 DPB1_HUMAN    | -0.0262241 | 0.7827403  |
| sp Q9Y5K5-2 UCHL5_HUMAN | -0.0260925 | 0          |
| sp P60709 ACTB_HUMAN    | -0.0258732 | 0          |
| sp P00492 HPRT_HUMAN    | -0.0251923 | 0          |
| sp Q00610-2 CLH1_HUMAN  | -0.0249443 | 0.09291492 |
| sp P26599-2 PTBP1_HUMAN | -0.0247307 | 0.1500082  |
| sp Q12905 ILF2_HUMAN    | -0.0246696 | 0.22977081 |
| sp P11678 PERE_HUMAN    | -0.0245762 | 0          |
| sp P55327-3 TPD52_HUMAN | -0.0245457 | 0          |
| sp P55265-4 DSRAD_HUMAN | -0.0242767 | 0.1558116  |
| sp Q9NQR4 NIT2_HUMAN    | -0.0241222 | 0.02174174 |
| sp P14314-2 GLU2B_HUMAN | -0.0239639 | 0.7173901  |
| sp Q8NBJ5 GT251_HUMAN   | -0.0237122 | 0.09894868 |
| sp P02511 CRYAB_HUMAN   | -0.0237045 | 0.09894868 |
| sp Q9BXP5-2 SRRT_HUMAN  | -0.0227909 | 0.06291623 |
| sp P43490 NAMPT_HUMAN   | -0.0225716 | 0.26099685 |
| sp Q9UNE7-2 CHIP_HUMAN  | -0.0209084 | 0.19149946 |
| sp Q9BUJ2-4 HNRL1_HUMAN | -0.0207176 | 0.49383867 |
| sp Q12907 LMAN2_HUMAN   | -0.0206909 | 0.19410844 |
| sp P04632 CPNS1_HUMAN   | -0.0202189 | 0.09851671 |
| sp Q16851 UGPA_HUMAN    | -0.0200768 | 0.1558116  |
| sp P15144 AMPN_HUMAN    | -0.0198078 | 0.01653191 |
| sp P13645 K1C10_HUMAN   | -0.0194702 | 0.04882055 |
| sp Q969H8 MYDGF_HUMAN   | -0.0184135 | 0.2178309  |
| sp Q12931-2 TRAP1_HUMAN | -0.01828   | 0.35795313 |
| sp Q9Y371-2 SHLB1_HUMAN | -0.0179062 | 0          |
| sp O00571-2 DDX3X_HUMAN | -0.0169868 | 0          |
| sp Q9Y262-2 EIF3L_HUMAN | -0.0167274 | 0.45720983 |
| sp P23368 MAOM_HUMAN    | -0.016674  | 0.14927356 |
| sp P25398 RS12_HUMAN    | -0.0162201 | 0.1897449  |
| sp Q9Y3Z3 SAMH1_HUMAN   | -0.0151577 | 0.05898649 |
| sp Q8N1G4 LRC47_HUMAN   | -0.0149994 | 0.7173901  |
| sp Q8WXF1 PSPC1_HUMAN   | -0.0145931 | 0.14672586 |
| sp P55795 HNRH2_HUMAN   | -0.0141068 | 0.25789237 |
| sp P25705 ATPA_HUMAN    | -0.0139198 | 0.06291623 |
| sp Q8NDH3 PEPL1_HUMAN   | -0.0136032 | 0.17319627 |
| sp Q9UNM6-2 PSD13_HUMAN | -0.0126839 | 0.04454162 |
| sp P62888 RL30_HUMAN    | -0.0126553 | 0.7061832  |
| sp Q9Y3I0 RTCB_HUMAN    | -0.0121574 | 0.02662771 |
| sp P30086 PEBP1_HUMAN   | -0.0115852 | 0.48520416 |
| sp P33176 KINH_HUMAN    | -0.0114784 | 0.26665917 |
| sp P12110 CO6A2_HUMAN   | -0.011116  | 0.22630788 |
| sp P04275 VWF_HUMAN     | -0.0104198 | 0.13193025 |

|                         |            |            |
|-------------------------|------------|------------|
| sp Q96JB5-4 CK5P3_HUMAN | -0.0101051 | 0.09894868 |
| sp Q6UVK1 CSPG4_HUMAN   | -0.0100288 | 0.20467198 |
| sp P54886-2 P5CS_HUMAN  | -0.009964  | 0.09894868 |
| sp O75368 SH3L1_HUMAN   | -0.0097332 | 0.2178309  |
| sp Q9NRV9 HEBP1_HUMAN   | -0.0091591 | 0          |
| sp Q969V3-2 NCLN_HUMAN  | -0.0087624 | 0.2178309  |
| sp Q04323-2 UBXN1_HUMAN | -0.0084553 | 0          |
| sp P27918 PROP_HUMAN    | -0.0081987 | 0          |
| sp O43143 DHX15_HUMAN   | -0.0072269 | 0          |
| sp P31153 METK2_HUMAN   | -0.0071049 | 0          |
| sp Q08209-5 PP2BA_HUMAN | -0.0057812 | 0          |
| sp O14818 PSA7_HUMAN    | -0.0054054 | 0.30819008 |
| sp P29401-2 TKT_HUMAN   | -0.0053768 | 0.09297622 |
| sp Q9NZ01 TECR_HUMAN    | -0.0050716 | 0          |
| sp P54578-3 UBP14_HUMAN | -0.004612  | 0.03043297 |
| sp Q9UL18 AGO1_HUMAN    | -0.0045738 | 0.35795313 |
| sp P07686 HEXB_HUMAN    | -0.0045509 | 0.17171621 |
| sp Q9BXS5-2 AP1M1_HUMAN | -0.0043888 | 0          |
| sp P03952 KLKB1_HUMAN   | -0.0041294 | 0.30372584 |
| sp P61970 NTF2_HUMAN    | -0.0040646 | 0.2178309  |
| sp Q9BRR6-2 ADPGK_HUMAN | -0.0039234 | 0          |
| sp P0C0L4 CO4A_HUMAN    | -0.0036011 | 0.19149946 |
| sp P24666 PPAC_HUMAN    | -0.0035439 | 0          |
| sp P41091 IF2G_HUMAN    | -0.0030613 | 0          |
| sp O14936-2 CSKP_HUMAN  | -0.0029068 | 0.33495146 |
| sp Q04837 SSBP_HUMAN    | -0.0023975 | 0.19149946 |
| sp P16278-2 BGAL_HUMAN  | -0.0019455 | 0.20467198 |
| sp Q14204 DYHC1_HUMAN   | -0.0013695 | 0.02575658 |
| sp Q9Y265 RUVB1_HUMAN   | -0.0011616 | 0          |
| sp P51688 SPHM_HUMAN    | -5.74E-04  | 0.21439649 |
| sp P10155 RO60_HUMAN    | -2.10E-04  | 0.06842031 |
| sp Q16401-2 PSMD5_HUMAN | 9.59E-04   | 0.23541966 |
| sp P31942-2 HNRH3_HUMAN | 0.00144959 | 0.20467198 |
| sp P50914 RL14_HUMAN    | 0.00206375 | 0.2178309  |
| sp P08134 RHOC_HUMAN    | 0.00225449 | 0          |
| sp Q16543 CDC37_HUMAN   | 0.00232315 | 0.2810592  |
| sp P50579-2 MAP2_HUMAN  | 0.00288773 | 0          |
| sp Q96CN7 ISOC1_HUMAN   | 0.00303268 | 0.09339783 |
| sp Q14764 MVP_HUMAN     | 0.00321579 | 0.3627779  |
| sp P49189 AL9A1_HUMAN   | 0.00362396 | 0.02127174 |
| sp Q12792-3 TWF1_HUMAN  | 0.00458717 | 0          |
| sp Q8NHV1 GIMA7_HUMAN   | 0.00492287 | 0          |
| sp P28065-2 PSB9_HUMAN  | 0.0051918  | 0.04454162 |
| sp Q14498-2 RBM39_HUMAN | 0.00542831 | 0.20467198 |
| sp Q16775-2 GLO2_HUMAN  | 0.007061   | 0.09894868 |

|                         |            |            |
|-------------------------|------------|------------|
| sp Q8N392 RHG18_HUMAN   | 0.00748062 | 0.2178309  |
| sp P02549-2 SPTA1_HUMAN | 0.00771713 | 0.6083561  |
| sp P47985 UCRI_HUMAN    | 0.00845909 | 0.09894868 |
| sp P14550 AK1A1_HUMAN   | 0.00852776 | 0.05908025 |
| sp P42566 EPS15_HUMAN   | 0.00860024 | 0          |
| sp Q13435 SF3B2_HUMAN   | 0.00902939 | 0.312067   |
| sp Q16527 CSR2_HUMAN    | 0.00948715 | 0.09894868 |
| sp P62269 RS18_HUMAN    | 0.00970078 | 0.09750395 |
| sp O00764-2 PDXK_HUMAN  | 0.00989246 | 0.45720983 |
| sp Q9UNZ2-5 NSF1C_HUMAN | 0.01033783 | 0.02662771 |
| sp P51178-2 PLCD1_HUMAN | 0.01044655 | 0          |
| sp P53041 PPP5_HUMAN    | 0.0110321  | 0          |
| sp Q96AE4-2 FUBP1_HUMAN | 0.0111084  | 0.12054814 |
| sp Q9UBW8 CSN7A_HUMAN   | 0.01127434 | 0.2178309  |
| sp O15498-2 YKT6_HUMAN  | 0.01170921 | 0.45033538 |
| sp P0CG39 POTEJ_HUMAN   | 0.01203919 | 0          |
| sp O60506-3 HNRPQ_HUMAN | 0.01266098 | 0.06291623 |
| sp P56537 IF6_HUMAN     | 0.01311302 | 0.04454162 |
| sp Q15691 MARE1_HUMAN   | 0.013134   | 0.37060758 |
| sp Q6UWY5 OLFL1_HUMAN   | 0.01407623 | 0.06695005 |
| sp P22392-2 NDKB_HUMAN  | 0.01420212 | 0.04454162 |
| sp P67809 YBOX1_HUMAN   | 0.01423645 | 0          |
| sp P60891 PRPS1_HUMAN   | 0.01424599 | 0          |
| sp Q9NSK0-5 KLC4_HUMAN  | 0.01435852 | 0.656254   |
| sp P12955 PEPD_HUMAN    | 0.0148983  | 0.24097534 |
| sp P00441 SODC_HUMAN    | 0.01498222 | 0.09339783 |
| sp P49755 TMEDA_HUMAN   | 0.01505852 | 0.21439649 |
| sp P31943 HNRH1_HUMAN   | 0.01603317 | 0.316588   |
| sp Q14980-2 NUMA1_HUMAN | 0.01617622 | 0.32702127 |
| sp P62136 PP1A_HUMAN    | 0.01692581 | 0          |
| sp Q06323 PSME1_HUMAN   | 0.01695061 | 0.37060758 |
| sp P15529-10 MCP_HUMAN  | 0.01705933 | 0          |
| sp Q9H9B4 SFXN1_HUMAN   | 0.0171814  | 0          |
| sp Q99829 CPNE1_HUMAN   | 0.01723576 | 0.1500082  |
| sp P47897 SYQ_HUMAN     | 0.01755905 | 0.20467198 |
| sp Q16531 DDB1_HUMAN    | 0.01773071 | 0.77930474 |
| sp Q16363-2 LAMA4_HUMAN | 0.01823235 | 0.16339546 |
| sp P02649 APOE_HUMAN    | 0.01863289 | 0.24702984 |
| sp P84085 ARF5_HUMAN    | 0.01880837 | 0          |
| sp P30153 2AAA_HUMAN    | 0.01882935 | 0.11475069 |
| sp P60228 EIF3E_HUMAN   | 0.01891136 | 0.06291623 |
| sp P07942 LAMB1_HUMAN   | 0.01927185 | 0.25200537 |
| sp Q15661 TRYB1_HUMAN   | 0.02106857 | 0.2699497  |
| sp P31930 QCR1_HUMAN    | 0.02133751 | 0.06210651 |
| sp P12004 PCNA_HUMAN    | 0.02169037 | 0.19149946 |

|                         |            |            |
|-------------------------|------------|------------|
| sp O43242 PSMD3_HUMAN   | 0.0224247  | 0.31759265 |
| sp Q15366-2 PCBP2_HUMAN | 0.02262116 | 0.2178309  |
| sp P52306-4 GDS1_HUMAN  | 0.02323341 | 0.09894868 |
| sp P11586 C1TC_HUMAN    | 0.02326202 | 0.2178309  |
| sp Q6DD88 ATLA3_HUMAN   | 0.02345085 | 0.24097534 |
| sp P05455 LA_HUMAN      | 0.02352524 | 0.65625405 |
| sp P46777 RL5_HUMAN     | 0.02373695 | 0.0315703  |
| sp P26885 FKBP2_HUMAN   | 0.02394104 | 0.19149946 |
| sp O60784-3 TOM1_HUMAN  | 0.02417755 | 0          |
| sp Q5TZA2 CROCC_HUMAN   | 0.02497482 | 0          |
| sp P07384 CAN1_HUMAN    | 0.02507019 | 0.03677253 |
| sp P05387 RLA2_HUMAN    | 0.02529907 | 0.45033538 |
| sp P30043 BLVRB_HUMAN   | 0.02540588 | 0.1342476  |
| sp P21810 PGS1_HUMAN    | 0.02547836 | 0.21133235 |
| sp P62714 PP2AB_HUMAN   | 0.02552414 | 0          |
| sp P60866-2 RS20_HUMAN  | 0.02590942 | 0.19149946 |
| sp Q9NQG5 RPR1B_HUMAN   | 0.02593803 | 0.35795313 |
| sp P36873-2 PP1G_HUMAN  | 0.02647018 | 0          |
| sp Q04695 K1C17_HUMAN   | 0.02650356 | 0          |
| sp P11940-2 PABP1_HUMAN | 0.02678299 | 0.35795313 |
| sp Q9C0C2 TB182_HUMAN   | 0.02717209 | 0.4075265  |
| sp Q1KMD3 HNRL2_HUMAN   | 0.02827644 | 0.04904167 |
| sp Q92696 PGTA_HUMAN    | 0.02902031 | 0          |
| sp P30520 PURA2_HUMAN   | 0.0293026  | 0.06986027 |
| sp P19823 ITIH2_HUMAN   | 0.03021622 | 0.83349776 |
| sp P61018-2 RAB4B_HUMAN | 0.03073311 | 0          |
| sp O14786 NRP1_HUMAN    | 0.03074074 | 0          |
| sp Q9H4A4 AMPB_HUMAN    | 0.03086853 | 0.05473607 |
| sp Q9BZZ5-5 API5_HUMAN  | 0.03087044 | 0.04454162 |
| sp P68400 CSK21_HUMAN   | 0.03104019 | 0          |
| sp P09619 PGFRB_HUMAN   | 0.03155899 | 0.09894868 |
| sp P00918 CAH2_HUMAN    | 0.03281021 | 0.48353976 |
| sp P02675 FIBB_HUMAN    | 0.03284454 | 0.33477    |
| sp P50453 SPB9_HUMAN    | 0.03290176 | 0.13248472 |
| sp P48637 GSHB_HUMAN    | 0.03376579 | 1.0951192  |
| sp P07900-2 HS90A_HUMAN | 0.03393745 | 0.43756488 |
| sp P21953 ODBB_HUMAN    | 0.03399658 | 0.09894868 |
| sp P40227 TCPZ_HUMAN    | 0.03437233 | 0.4490988  |
| sp P36871 PGM1_HUMAN    | 0.03442192 | 0          |
| sp P61026 RAB10_HUMAN   | 0.03585625 | 0.45033538 |
| sp P46063 RECQ1_HUMAN   | 0.03608894 | 0          |
| sp P53602 MVD1_HUMAN    | 0.03680992 | 0.09894868 |
| sp P63244 RACK1_HUMAN   | 0.03735733 | 0.3731982  |
| sp Q71UM5 RS27L_HUMAN   | 0.03779221 | 0          |
| sp Q9P2X0-2 DPM3_HUMAN  | 0.03816986 | 0.19149946 |

|                          |            |            |
|--------------------------|------------|------------|
| sp P48739 PIPNB_HUMAN    | 0.03841019 | 0          |
| sp O00232 PSD12_HUMAN    | 0.03842545 | 0.25789237 |
| sp P55010 IF5_HUMAN      | 0.03859711 | 0.09750395 |
| sp O95394-3 AGM1_HUMAN   | 0.03868866 | 0          |
| sp Q14914-2 PTGR1_HUMAN  | 0.0394783  | 0          |
| sp Q9UBQ7 GRHPR_HUMAN    | 0.03952789 | 0.45563722 |
| sp P02730 B3AT_HUMAN     | 0.03960419 | 0.2131149  |
| sp P13928 ANXA8_HUMAN    | 0.03993988 | 0.19149946 |
| sp P01833 PIGR_HUMAN     | 0.04096603 | 0.35520625 |
| sp O94905 ERLN2_HUMAN    | 0.04128647 | 0.312067   |
| sp P18124 RL7_HUMAN      | 0.04191589 | 0.56808305 |
| sp P25787 PSA2_HUMAN     | 0.04196549 | 0.93112767 |
| sp Q14108 SCRB2_HUMAN    | 0.04209709 | 0.19149946 |
| sp O95336 6PGL_HUMAN     | 0.04227829 | 0.95332193 |
| sp P32455 GBP1_HUMAN     | 0.04247284 | 0.14672586 |
| sp P11142 HSP7C_HUMAN    | 0.04288292 | 0.7263896  |
| sp O15372 EIF3H_HUMAN    | 0.04302788 | 0.09894868 |
| sp Q9NYF8-2 BCLF1_HUMAN  | 0.04328346 | 0.312067   |
| sp P15170-2 ERF3A_HUMAN  | 0.04387665 | 0          |
| sp Q96BW5-2 PTER_HUMAN   | 0.04388046 | 0          |
| sp O00233-2 PSMD9_HUMAN  | 0.04449272 | 0.19149946 |
| sp P55209-2 NP1L1_HUMAN  | 0.04484177 | 0          |
| sp O00429-6 DNM1L_HUMAN  | 0.0450058  | 0.06986027 |
| sp P20591 MX1_HUMAN      | 0.04503632 | 0.26737198 |
| sp Q02790 FKBP4_HUMAN    | 0.04589272 | 0.21439649 |
| sp P00736 C1R_HUMAN      | 0.04620361 | 0.35795313 |
| sp Q15637-2 SF01_HUMAN   | 0.04620743 | 0.19149946 |
| sp P49721 PSB2_HUMAN     | 0.04671669 | 0.19149946 |
| sp P54652 HSP72_HUMAN    | 0.04735756 | 0.2178309  |
| sp Q08211 DHX9_HUMAN     | 0.04820442 | 0.3703328  |
| sp Q99460 PSMD1_HUMAN    | 0.04829216 | 0.3761346  |
| sp P61201-2 CSN2_HUMAN   | 0.04847908 | 0.19149946 |
| sp Q13557-12 KCC2D_HUMAN | 0.04870415 | 0.45720983 |
| sp P61224 RAP1B_HUMAN    | 0.04888725 | 0          |
| sp P62424 RL7A_HUMAN     | 0.04949188 | 0.14672586 |
| sp Q09028-3 RBBP4_HUMAN  | 0.05097199 | 0.656254   |
| sp P05165-2 PCCA_HUMAN   | 0.05122757 | 0.4065472  |
| sp P61978-3 HNRPK_HUMAN  | 0.05140877 | 0.79155684 |
| sp O94973-2 AP2A2_HUMAN  | 0.05221558 | 0.2699497  |
| sp O43252 PAPS1_HUMAN    | 0.05237579 | 0.28516325 |
| sp P23229-4 ITA6_HUMAN   | 0.05253029 | 0.45033538 |
| sp P52907 CAZA1_HUMAN    | 0.05271339 | 0.18414244 |
| sp O60701-2 UGDH_HUMAN   | 0.05283356 | 0          |
| sp Q15005 SPCS2_HUMAN    | 0.05302048 | 0.7061832  |
| sp O60664-4 PLIN3_HUMAN  | 0.0531807  | 0.14672586 |

|                         |            |            |
|-------------------------|------------|------------|
| sp Q08380 LG3BP_HUMAN   | 0.05326462 | 0.55060285 |
| sp Q15417 CNN3_HUMAN    | 0.05327416 | 0.2178309  |
| sp O60884 DNJA2_HUMAN   | 0.05330086 | 0.40256184 |
| sp P12081-4 SYHC_HUMAN  | 0.0540123  | 0.1558116  |
| sp Q13200 PSMD2_HUMAN   | 0.05428886 | 0.09894868 |
| sp P46976-2 GLYG_HUMAN  | 0.05477715 | 0.33495146 |
| sp Q9Y3F4-2 STRAP_HUMAN | 0.05480003 | 0.5204253  |
| sp Q7Z4H8 PLGT3_HUMAN   | 0.05485916 | 0          |
| sp Q9UJU6-2 DBNL_HUMAN  | 0.05522919 | 0.06291623 |
| sp P24534 EF1B_HUMAN    | 0.05677986 | 0.19149946 |
| sp Q14651 PLSI_HUMAN    | 0.05678368 | 0          |
| sp P67936 TPM4_HUMAN    | 0.05710793 | 0.47741386 |
| sp Q8WXX5 DNJC9_HUMAN   | 0.05849457 | 0.19149946 |
| sp O95861-4 BPNT1_HUMAN | 0.05903435 | 0          |
| sp Q16774 KGUA_HUMAN    | 0.0590477  | 0          |
| sp Q8N163-2 CCAR2_HUMAN | 0.05933476 | 0.5204253  |
| sp O14980 XPO1_HUMAN    | 0.05957794 | 0.09894868 |
| sp P31040 SDHA_HUMAN    | 0.05993462 | 0.2453838  |
| sp P31146 COR1A_HUMAN   | 0.06005478 | 1.2873641  |
| sp P02679-2 FIBG_HUMAN  | 0.06007004 | 0.24452867 |
| sp P55263 ADK_HUMAN     | 0.06012535 | 0.06291623 |
| sp P26641 EF1G_HUMAN    | 0.0604744  | 0.21971017 |
| sp P34897-2 GLYM_HUMAN  | 0.06052971 | 0.37061578 |
| sp Q9BTE1 DCTN5_HUMAN   | 0.06085968 | 0          |
| sp P54136 SYRC_HUMAN    | 0.0609169  | 0.02174174 |
| sp Q9BVK6 TMED9_HUMAN   | 0.06093979 | 0.2178309  |
| sp P29144 TPP2_HUMAN    | 0.06097603 | 0.43633315 |
| sp Q6P2Q9 PRP8_HUMAN    | 0.06131554 | 0.09894868 |
| sp P30044-2 PRDX5_HUMAN | 0.06144714 | 0.656254   |
| sp O15031 PLXB2_HUMAN   | 0.06144905 | 1.0644729  |
| sp Q7L5N1 CSN6_HUMAN    | 0.06279469 | 0.19149946 |
| sp P02765 FETUA_HUMAN   | 0.06394196 | 0.7740364  |
| sp P62195 PRS8_HUMAN    | 0.06417847 | 0          |
| sp O95782-2 AP2A1_HUMAN | 0.06424332 | 0.7498006  |
| sp P27694 RFA1_HUMAN    | 0.06432533 | 0.06842031 |
| sp Q9UL46 PSME2_HUMAN   | 0.06471443 | 0.7498006  |
| sp P05388 RLA0_HUMAN    | 0.06477547 | 0.7061832  |
| sp P35542 SAA4_HUMAN    | 0.06480789 | 0.19149946 |
| sp P35998 PRS7_HUMAN    | 0.06542397 | 0.22977081 |
| sp P01034 CYTC_HUMAN    | 0.06632996 | 0.45033538 |
| sp P25325-2 THTM_HUMAN  | 0.06658745 | 0.1342476  |
| sp Q9Y230 RUVB2_HUMAN   | 0.06678772 | 0.00519248 |
| sp P23142-4 FBLN1_HUMAN | 0.06681442 | 0          |
| sp P49354-2 FNNTA_HUMAN | 0.06683922 | 0          |
| sp P50395 GDIB_HUMAN    | 0.06686783 | 0.01269578 |

|                         |            |            |
|-------------------------|------------|------------|
| sp P02671 FIBA_HUMAN    | 0.06690407 | 1.1204947  |
| sp Q12906-4 ILF3_HUMAN  | 0.06692314 | 0.9380495  |
| sp P50990 TCPQ_HUMAN    | 0.06718254 | 0.90534914 |
| sp Q99426 TBCB_HUMAN    | 0.06762886 | 0.5204253  |
| sp P48643 TCPE_HUMAN    | 0.06800652 | 0.9609878  |
| sp Q9ULA0 DNPEP_HUMAN   | 0.06804085 | 0.9847622  |
| sp Q8NBF2-2 NHLC2_HUMAN | 0.0697155  | 0          |
| sp Q562R1 ACTBL_HUMAN   | 0.06974983 | 0          |
| sp P05452 TETN_HUMAN    | 0.07024002 | 0.5204253  |
| sp P00558 PGK1_HUMAN    | 0.07025528 | 0          |
| sp Q8WVM8 SCFD1_HUMAN   | 0.07125282 | 0.37060758 |
| sp P27348 1433T_HUMAN   | 0.07145309 | 0.6452372  |
| sp Q13630 FCL_HUMAN     | 0.07267761 | 0.19149946 |
| sp Q9UHL4 DPP2_HUMAN    | 0.07271195 | 1.2805575  |
| sp Q15323 K1H1_HUMAN    | 0.07345963 | 0.656254   |
| sp O60313-10 OPA1_HUMAN | 0.07358551 | 0.19149946 |
| sp P55884-2 EIF3B_HUMAN | 0.07394028 | 0.33495146 |
| sp Q14515-2 SPRL1_HUMAN | 0.07395744 | 0          |
| sp Q709C8-3 VP13C_HUMAN | 0.07405853 | 0.6167118  |
| sp P19827 ITIH1_HUMAN   | 0.07424164 | 0.8654178  |
| sp Q13418 ILK_HUMAN     | 0.07429123 | 0          |
| sp Q14240-2 IF4A2_HUMAN | 0.07466984 | 0.30372584 |
| sp O75923-11 DYSF_HUMAN | 0.07471657 | 0.61034113 |
| sp P68366-2 TBA4A_HUMAN | 0.07545471 | 0          |
| sp P14923 PLAK_HUMAN    | 0.07551384 | 0.35193655 |
| sp P51692 STA5B_HUMAN   | 0.07562161 | 0.19149946 |
| sp Q9NP79 VTA1_HUMAN    | 0.07610321 | 0.2178309  |
| sp O43488 ARK72_HUMAN   | 0.07673264 | 0.1342476  |
| sp Q9UK22 FBX2_HUMAN    | 0.07680321 | 0          |
| sp P34896-2 GLYC_HUMAN  | 0.07711315 | 0          |
| sp Q12797-10 ASPH_HUMAN | 0.07777023 | 0.7220187  |
| sp O00487 PSDE_HUMAN    | 0.0782547  | 0          |
| sp Q99832 TCPH_HUMAN    | 0.07941818 | 0.54838234 |
| sp P05156 CFAI_HUMAN    | 0.07979584 | 1.3006523  |
| sp P00734 THRB_HUMAN    | 0.08078957 | 0.97180504 |
| sp P23588 IF4B_HUMAN    | 0.08080101 | 0.97209185 |
| sp Q9UNH7-2 SNX6_HUMAN  | 0.08080292 | 0          |
| sp Q86WV6 STING_HUMAN   | 0.08148384 | 0.35795313 |
| sp A0FGR8-2 ESYT2_HUMAN | 0.08227348 | 0          |
| sp P14618 KPYM_HUMAN    | 0.08251953 | 0.04454162 |
| sp P00966 ASSY_HUMAN    | 0.08257484 | 0.29066643 |
| sp Q14203-3 DCTN1_HUMAN | 0.08350754 | 0.7217418  |
| sp P50502 F10A1_HUMAN   | 0.08363724 | 0.6791336  |
| sp Q9P2J5-2 SYLC_HUMAN  | 0.08431339 | 0.19149946 |
| sp P23634-8 AT2B4_HUMAN | 0.08445931 | 0.47871065 |

|                         |            |            |
|-------------------------|------------|------------|
| sp Q13425 SNTB2_HUMAN   | 0.08481598 | 0.09750395 |
| sp P62244 RS15A_HUMAN   | 0.08587265 | 1.1932944  |
| sp Q96FV2-2 SCRN2_HUMAN | 0.08617592 | 0.19149946 |
| sp Q9Y2X3 NOP58_HUMAN   | 0.08624649 | 0.70235044 |
| sp P17980 PRS6A_HUMAN   | 0.08662415 | 0.31759265 |
| sp Q9Y6W5 WASF2_HUMAN   | 0.08720779 | 0.2178309  |
| sp P63104 1433Z_HUMAN   | 0.08720779 | 1.1437052  |
| sp Q99873-3 ANM1_HUMAN  | 0.0873661  | 0.33495146 |
| sp Q6DKJ4 NXN_HUMAN     | 0.08885384 | 0.45033538 |
| sp O75937 DNJC8_HUMAN   | 0.08929825 | 0.1342476  |
| sp Q99436 PSB7_HUMAN    | 0.08984757 | 0.19149946 |
| sp O95466-2 FMNL1_HUMAN | 0.09017658 | 0          |
| sp P61981 1433G_HUMAN   | 0.09052658 | 1.2954973  |
| sp P62995-3 TRA2B_HUMAN | 0.09158707 | 0.45033538 |
| sp P11217 PYGM_HUMAN    | 0.09164429 | 0.656254   |
| sp P68104 EF1A1_HUMAN   | 0.09178543 | 0.3852666  |
| sp P12268 IMDH2_HUMAN   | 0.09181595 | 1.1932944  |
| sp P46459 NSF_HUMAN     | 0.09199905 | 0.30372584 |
| sp O14579 COPE_HUMAN    | 0.09277535 | 0.95332193 |
| sp P18583-10 SON_HUMAN  | 0.09290505 | 0.19149946 |
| sp Q9NUV9 GIMA4_HUMAN   | 0.09391975 | 1.1687785  |
| sp Q9GZT8 NIF3L_HUMAN   | 0.09394455 | 1.1932944  |
| sp Q92945 FUBP2_HUMAN   | 0.09409332 | 0.31759265 |
| sp Q8NF91-4 SYNE1_HUMAN | 0.09464455 | 0.19149946 |
| sp P15088 CBPA3_HUMAN   | 0.09506798 | 0.5111962  |
| sp O43776 SYNC_HUMAN    | 0.09523773 | 0.63371044 |
| sp P16070-7 CD44_HUMAN  | 0.09542084 | 0          |
| sp Q92598-2 HS105_HUMAN | 0.09544563 | 0.656254   |
| sp P56134-3 ATPK_HUMAN  | 0.09576988 | 0          |
| sp P15880 RS2_HUMAN     | 0.09662819 | 0.40256184 |
| sp P31939 PUR9_HUMAN    | 0.09669113 | 0.4214492  |
| sp Q13126-2 MTAP_HUMAN  | 0.09687042 | 1.0370445  |
| sp P49720 PSB3_HUMAN    | 0.09692001 | 1.1791906  |
| sp Q9HBL0 TENS1_HUMAN   | 0.09734154 | 1.2872459  |
| sp Q9Y696 CLIC4_HUMAN   | 0.09803009 | 0.44572112 |
| sp Q9Y3A3-3 PHOCN_HUMAN | 0.09875488 | 0.45033538 |
| sp Q32P44 EMAL3_HUMAN   | 0.0996666  | 0.35795313 |
| sp P39019 RS19_HUMAN    | 0.1011467  | 0.2178309  |
| sp Q8NCW5 NNRE_HUMAN    | 0.10137367 | 0.7588735  |
| sp Q9NQW7-3 XPP1_HUMAN  | 0.10151482 | 0.03367973 |
| sp P61247 RS3A_HUMAN    | 0.10171509 | 0.8744098  |
| sp P62913-2 RL11_HUMAN  | 0.10208511 | 0.7827403  |
| sp Q99798 ACON_HUMAN    | 0.10246086 | 1.0902835  |
| sp P37108 SRP14_HUMAN   | 0.10256195 | 0.45033538 |
| sp O43865 SAHH2_HUMAN   | 0.10307884 | 0.09894868 |



|                         |            |            |
|-------------------------|------------|------------|
| sp P23083 HV102_HUMAN   | 0.10418892 | 0          |
| sp P07358 CO8B_HUMAN    | 0.10424233 | 0.25789237 |
| sp P09543-2 CN37_HUMAN  | 0.10435867 | 0.70235044 |
| sp O75489 NDUS3_HUMAN   | 0.10625649 | 0.6298893  |
| sp P02042 HBD_HUMAN     | 0.10668564 | 0.33495146 |
| sp P36542 ATPG_HUMAN    | 0.10767651 | 0.656254   |
| sp Q14894 CRYM_HUMAN    | 0.10821533 | 1.1932944  |
| sp Q15008-4 PSMD6_HUMAN | 0.10825157 | 0          |
| sp P84243 H33_HUMAN     | 0.10838413 | 0          |
| sp A5A3E0 POTEF_HUMAN   | 0.10857201 | 0          |
| sp P46783 RS10_HUMAN    | 0.10948944 | 0.19149946 |
| sp P02652-2 APOA2_HUMAN | 0.11044502 | 0.29066643 |
| sp Q5K4L6 S27A3_HUMAN   | 0.11058807 | 1.0301651  |
| sp Q9NSD9 SYFB_HUMAN    | 0.1108036  | 0.1342476  |
| sp Q13526 PIN1_HUMAN    | 0.11107636 | 0.19149946 |
| sp P29692-2 EF1D_HUMAN  | 0.11126709 | 1.1505735  |
| sp P18084 ITB5_HUMAN    | 0.11136246 | 0.7827403  |
| sp P00491 PNPH_HUMAN    | 0.11140442 | 1.0951192  |
| sp P55060-3 XPO2_HUMAN  | 0.11250305 | 0.79861414 |
| sp Q9BUT1 BDH2_HUMAN    | 0.1125412  | 0.44572112 |
| sp O95479 G6PE_HUMAN    | 0.11265183 | 0.5111962  |
| sp Q14974 IMB1_HUMAN    | 0.11315537 | 1.1551039  |
| sp Q15029-2 U5S1_HUMAN  | 0.11359787 | 0.6828178  |
| sp P78406 RAE1L_HUMAN   | 0.11487198 | 0.312067   |
| sp O75503 CLN5_HUMAN    | 0.11552811 | 0.5204253  |
| sp P16298-4 PP2BB_HUMAN | 0.11629486 | 0.312067   |
| sp Q13867 BLMH_HUMAN    | 0.11675263 | 0.19149946 |
| sp P08865 RSSA_HUMAN    | 0.11711502 | 0.91072154 |
| sp P28070 PSB4_HUMAN    | 0.11728859 | 1.1687785  |
| sp P42704 LPPRC_HUMAN   | 0.11781693 | 0          |
| sp Q93034 CUL5_HUMAN    | 0.11852455 | 0          |
| sp Q5JRX3-3 PREP_HUMAN  | 0.11852646 | 1.1932944  |
| sp P30419-2 NMT1_HUMAN  | 0.11968613 | 0.656254   |
| sp Q9NY15 STAB1_HUMAN   | 0.11970139 | 0          |
| sp Q06210-2 GFPT1_HUMAN | 0.11972809 | 0.84879977 |
| sp Q15121 PEA15_HUMAN   | 0.11996651 | 0.7061832  |
| sp P24821-4 TENA_HUMAN  | 0.12018585 | 0.6615227  |
| sp P55735-2 SEC13_HUMAN | 0.12021256 | 0.8983557  |
| sp Q15149-9 PLEC_HUMAN  | 0.12071991 | 0.656254   |
| sp P62333 PRS10_HUMAN   | 0.12212753 | 0.48520416 |
| sp P25774 CATS_HUMAN    | 0.12368584 | 0.35795313 |
| sp P31948 STIP1_HUMAN   | 0.12405586 | 0          |
| sp P52888 THOP1_HUMAN   | 0.12430573 | 0.45033538 |
| sp Q15819 UB2V2_HUMAN   | 0.12491036 | 0.656254   |
| sp O00170 AIP_HUMAN     | 0.12524986 | 1.2095301  |

|                           |            |            |
|---------------------------|------------|------------|
| sp P42224-2 STAT1_HUMAN   | 0.1257     | 0.6115017  |
| sp P21912 SDHB_HUMAN      | 0.12613869 | 0.7061832  |
| sp O14744 ANM5_HUMAN      | 0.12630844 | 0.45033538 |
| sp P22352 GPX3_HUMAN      | 0.1270523  | 0.91601294 |
| sp P07741 APT_HUMAN       | 0.12751389 | 0.8059303  |
| sp Q96AG4 LRC59_HUMAN     | 0.12767029 | 1.1791906  |
| sp P62857 RS28_HUMAN      | 0.12777138 | 0.7061832  |
| sp P06748-2 NPM_HUMAN     | 0.12779617 | 0.80804527 |
| sp Q9Y639-4 NPTN_HUMAN    | 0.12938786 | 0.19149946 |
| sp P31689-2 DNJA1_HUMAN   | 0.12968254 | 0.6070219  |
| sp Q9Y2B0 CNPY2_HUMAN     | 0.1301918  | 0.91601294 |
| sp Q02952-2 AKA12_HUMAN   | 0.13088608 | 0.7827403  |
| sp P19404 NDUV2_HUMAN     | 0.1311245  | 1.1932944  |
| sp Q9UHX1-6 PUF60_HUMAN   | 0.13143158 | 0.2178309  |
| sp O94776 MTA2_HUMAN      | 0.13183784 | 1.2941489  |
| sp Q13464 ROCK1_HUMAN     | 0.13236618 | 0.2178309  |
| sp O43790 KRT86_HUMAN     | 0.13237    | 0.656254   |
| sp P06681-3 CO2_HUMAN     | 0.13250732 | 1.1791906  |
| sp P52758 RIDA_HUMAN      | 0.13308525 | 0.7827403  |
| sp P22102 PUR2_HUMAN      | 0.13341522 | 0.21439649 |
| sp Q5TFE4 NT5D1_HUMAN     | 0.1351223  | 0          |
| sp Q9UKV3-5 ACINU_HUMAN   | 0.135458   | 0.8272904  |
| sp Q12882 DPYD_HUMAN      | 0.1360817  | 1.1932944  |
| sp Q06828 FMOD_HUMAN      | 0.1363945  | 0.7827403  |
| sp Q8TD55 PKHO2_HUMAN     | 0.13746071 | 0.7827403  |
| sp P20810-4 ICAL_HUMAN    | 0.13751793 | 0.5204253  |
| sp P53992 SC24C_HUMAN     | 0.1377964  | 0.6298893  |
| sp Q93009-3 UBP7_HUMAN    | 0.13781166 | 1.1932944  |
| sp Q9UBC2-2 EP15R_HUMAN   | 0.1389761  | 0.19149946 |
| sp Q9NY33 DPP3_HUMAN      | 0.14040756 | 0.63371044 |
| sp Q15437 SC23B_HUMAN     | 0.14055634 | 0.656254   |
| sp Q99733-2 NP1L4_HUMAN   | 0.14081669 | 0.65625405 |
| sp P39023 RL3_HUMAN       | 0.14105034 | 0.7588735  |
| sp Q8NHP8 PLBL2_HUMAN     | 0.14107323 | 0.7827403  |
| sp P30046 DOPD_HUMAN      | 0.14273834 | 1.1932944  |
| sp Q8TAT6-2 NPL4_HUMAN    | 0.14385319 | 0.35193655 |
| sp P51665 PSMD7_HUMAN     | 0.14427185 | 0.7827403  |
| sp P30613-2 KPYR_HUMAN    | 0.14460182 | 0.656254   |
| sp A0A0B4J1X8 HV343_HUMAN | 0.1452713  | 0          |
| sp Q9Y281 COF2_HUMAN      | 0.14557648 | 0.91601294 |
| sp O43396 TXNL1_HUMAN     | 0.14881516 | 0.7827403  |
| sp Q14697 GANAB_HUMAN     | 0.15060043 | 1.1932944  |
| BirA-TRIP6_BirAT6         | 0.15146828 | 0.45033538 |
| sp Q7Z4I7-3 LIMS2_HUMAN   | 0.15323544 | 1.1932944  |
| sp Q9BUF5 TBB6_HUMAN      | 0.1535492  | 0.7588735  |

|                         |            |            |
|-------------------------|------------|------------|
| sp Q9P2T1-2 GMPR2_HUMAN | 0.15413094 | 0.70235044 |
| sp Q92499 DDX1_HUMAN    | 0.15468407 | 0.74639726 |
| sp P04066 FUCO_HUMAN    | 0.15529633 | 1.1505735  |
| sp O95302-3 FKBP9_HUMAN | 0.15555954 | 0.45033538 |
| sp Q96P70 IPO9_HUMAN    | 0.15565109 | 1.0485198  |
| sp P10644 KAP0_HUMAN    | 0.15668297 | 0.312067   |
| sp Q96FN4 CPNE2_HUMAN   | 0.15696144 | 0          |
| sp O75828 CBR3_HUMAN    | 0.15713882 | 0.45033538 |
| sp P35579-2 MYH9_HUMAN  | 0.15755844 | 0.656254   |
| sp Q15274 NADC_HUMAN    | 0.15886497 | 0.91601294 |
| sp Q86VS8 HOOK3_HUMAN   | 0.15958023 | 0.7827403  |
| sp P13693 TCTP_HUMAN    | 0.16000938 | 0.45033538 |
| sp Q96PD5-2 PGRP2_HUMAN | 0.1618309  | 0.8983557  |
| sp P08185 CBG_HUMAN     | 0.1627922  | 1.1932944  |
| sp P00748 FA12_HUMAN    | 0.16456223 | 0.91601294 |
| sp Q9HB71 CYBP_HUMAN    | 0.16623497 | 0.312067   |
| sp P62249 RS16_HUMAN    | 0.1674099  | 1.1505735  |
| sp Q16134-3 ETFD_HUMAN  | 0.16784286 | 0.45033538 |
| sp Q7L576 CYFP1_HUMAN   | 0.16806793 | 0          |
| sp P49903-2 SPS1_HUMAN  | 0.16813278 | 0.91601294 |
| sp P12111-4 CO6A3_HUMAN | 0.16972733 | 0.656254   |
| sp P22059 OSBP1_HUMAN   | 0.17030907 | 0.45033538 |
| sp P43686 PRS6B_HUMAN   | 0.17045021 | 1.2109947  |
| sp P60981 DEST_HUMAN    | 0.17071533 | 0.7498006  |
| sp Q9UBE0 SAE1_HUMAN    | 0.17100525 | 0.35795313 |
| sp P00738 HPT_HUMAN     | 0.17247391 | 0.656254   |
| sp O15260-2 SURF4_HUMAN | 0.17302513 | 0.19149946 |
| sp P21589-2 5NTD_HUMAN  | 0.17370796 | 0.7827403  |
| sp O60610-2 DIAP1_HUMAN | 0.17458534 | 0.30372584 |
| sp Q8TBC4-2 UBA3_HUMAN  | 0.17540741 | 1.1932944  |
| sp P09972 ALDOC_HUMAN   | 0.17605019 | 1.1497186  |
| sp A0AVT1 UBA6_HUMAN    | 0.17720222 | 0.69308156 |
| sp Q99598 TSNAX_HUMAN   | 0.17725754 | 0.5204253  |
| sp Q96HC4 PDLI5_HUMAN   | 0.17884064 | 0.656254   |
| sp Q9BTE3-2 MCMBP_HUMAN | 0.18108082 | 0.45033538 |
| sp P01911 2B1F_HUMAN    | 0.18162155 | 1.1932944  |
| sp P62854 RS26_HUMAN    | 0.18262863 | 0.7827403  |
| sp Q7LG56-6 RIR2B_HUMAN | 0.18697548 | 1.1932944  |
| sp Q9NTK5 OLA1_HUMAN    | 0.187294   | 0.45033538 |
| sp Q13243-3 SRSF5_HUMAN | 0.18746376 | 0.656254   |
| sp P01892 1A02_HUMAN    | 0.18762016 | 0.7061832  |
| sp Q13976 KGP1_HUMAN    | 0.18936348 | 0          |
| sp Q9BWS9-3 CHID1_HUMAN | 0.18950844 | 0.656254   |
| sp P52895 AK1C2_HUMAN   | 0.18975067 | 0.19149946 |
| sp P14174 MIF_HUMAN     | 0.19006538 | 0.7061832  |

|                         |            |            |
|-------------------------|------------|------------|
| sp P0C0L5 CO4B_HUMAN    | 0.19034195 | 0.7827403  |
| sp P08779 K1C16_HUMAN   | 0.19146633 | 1.1932944  |
| sp P63241 IF5A1_HUMAN   | 0.19202042 | 0.656254   |
| sp P23219-2 PGH1_HUMAN  | 0.19739151 | 1.2095301  |
| sp P48741 HSP77_HUMAN   | 0.20043945 | 0.656254   |
| sp P69905 HBA_HUMAN     | 0.20126534 | 0.95332193 |
| sp P09874 PARP1_HUMAN   | 0.20211601 | 0.29066643 |
| sp Q5TDH0-3 DDI2_HUMAN  | 0.20318222 | 0.5204253  |
| sp Q6ZVM7-3 TM1L2_HUMAN | 0.20527744 | 0.45033538 |
| sp P09871 C1S_HUMAN     | 0.2063675  | 0.09894868 |
| sp Q9H6S3 ES8L2_HUMAN   | 0.20638752 | 0.45033538 |
| sp Q9HD45 TM9S3_HUMAN   | 0.2080555  | 0.7827403  |
| sp Q92629-3 SGCD_HUMAN  | 0.20808029 | 1.2095301  |
| sp Q9BZE9-2 ASPC1_HUMAN | 0.21119308 | 0.656254   |
| sp P13671 CO6_HUMAN     | 0.21279335 | 1.1505735  |
| sp O94919 ENDD1_HUMAN   | 0.21400642 | 0.19149946 |
| sp P62191-2 PRS4_HUMAN  | 0.21520424 | 0.5204253  |
| sp P01743 HV146_HUMAN   | 0.21647453 | 0.656254   |
| sp O60832 DKC1_HUMAN    | 0.22153854 | 1.1932944  |
| sp Q13885 TBB2A_HUMAN   | 0.2215538  | 0          |
| sp P20039 2B1B_HUMAN    | 0.22213745 | 0.656254   |
| sp Q8NC51-3 PAIRB_HUMAN | 0.2227602  | 1.1932944  |
| sp P42785-2 PCP_HUMAN   | 0.22432518 | 1.2773042  |
| sp Q9UBS4 DJB11_HUMAN   | 0.22594261 | 1.1932944  |
| sp P06132 DCUP_HUMAN    | 0.2283001  | 0.97209185 |
| sp Q04446 GLGB_HUMAN    | 0.22938156 | 0.06291623 |
| sp Q9UNS2 CSN3_HUMAN    | 0.23162842 | 0.656254   |
| sp Q13642-1 FHL1_HUMAN  | 0.2323494  | 0.656254   |
| sp Q96HN2-2 SAHH3_HUMAN | 0.23542023 | 0.656254   |
| sp P35637-2 FUS_HUMAN   | 0.23897076 | 0.7827403  |
| sp Q15286 RAB35_HUMAN   | 0.24458218 | 0.656254   |
| sp O75533 SF3B1_HUMAN   | 0.24580002 | 1.1932944  |
| sp Q9NR56-2 MBNL1_HUMAN | 0.2474289  | 0.45033538 |
| sp Q93084-2 AT2A3_HUMAN | 0.24872208 | 1.1932944  |
| sp P61923 COPZ1_HUMAN   | 0.2528267  | 0.7827403  |
| sp P07996 TSP1_HUMAN    | 0.26031017 | 0.7061832  |
| sp P14207 FOLR2_HUMAN   | 0.26111794 | 0.656254   |
| sp Q96HY6 DDR GK_HUMAN  | 0.2616663  | 0.656254   |
| sp P62633-3 CNBP_HUMAN  | 0.2631588  | 0.7827403  |
| sp P01782 HV309_HUMAN   | 0.26563644 | 0.656254   |
| sp Q15436 SC23A_HUMAN   | 0.2750883  | 1.0485198  |
| sp P62753 RS6_HUMAN     | 0.275774   | 0.7061832  |
| sp Q9UJZ1-2 STML2_HUMAN | 0.2758541  | 0.7061832  |
| sp Q96M27-3 PRRC1_HUMAN | 0.27661705 | 1.1932944  |
| sp Q13310-2 PABP4_HUMAN | 0.28466034 | 0.656254   |

|                           |            |            |
|---------------------------|------------|------------|
| sp P67775 PP2AA_HUMAN     | 0.28541183 | 0.656254   |
| sp Q7Z7G0 TARSH_HUMAN     | 0.28611946 | 1.1932944  |
| sp Q03519 TAP2_HUMAN      | 0.28821945 | 0.656254   |
| sp P27695 APEX1_HUMAN     | 0.2895584  | 0.45033538 |
| sp P35080-2 PROF2_HUMAN   | 0.29071808 | 0.656254   |
| sp P0DOX3 IGD_HUMAN       | 0.2919445  | 0.656254   |
| sp P84098 RL19_HUMAN      | 0.29273224 | 0.7827403  |
| sp Q9P1F3 ABRAL_HUMAN     | 0.2951107  | 0.656254   |
| sp P35858-2 ALS_HUMAN     | 0.29603195 | 1.1932944  |
| sp Q8TD19 NEK9_HUMAN      | 0.29684448 | 1.1932944  |
| sp O14617-4 AP3D1_HUMAN   | 0.2973404  | 1.1932944  |
| sp P04844 RPN2_HUMAN      | 0.30129433 | 1.0634323  |
| sp Q13596-2 SNX1_HUMAN    | 0.30274963 | 0.656254   |
| sp P12814 ACTN1_HUMAN     | 0.3041172  | 0.656254   |
| sp Q92747 ARC1A_HUMAN     | 0.3043518  | 0.656254   |
| sp P01591 IGJ_HUMAN       | 0.3056984  | 1.1932944  |
| sp Q08379 GOGA2_HUMAN     | 0.3082018  | 1.1932944  |
| sp P57737-4 CORO7_HUMAN   | 0.3101902  | 1.1932944  |
| sp P61803 DAD1_HUMAN      | 0.31290817 | 0.656254   |
| sp Q06278 AOXA_HUMAN      | 0.31308937 | 1.1932944  |
| sp Q03113 GNA12_HUMAN     | 0.317461   | 0.656254   |
| sp P12814-2 ACTN1_HUMAN   | 0.31881714 | 1.1932944  |
| sp P54802 ANAG_HUMAN      | 0.3263626  | 1.1932944  |
| sp Q14141-2 SEPT6_HUMAN   | 0.3324852  | 0.656254   |
| sp Q9Y5P6-2 GMPPB_HUMAN   | 0.3346386  | 1.0301651  |
| sp Q15046 SYK_HUMAN       | 0.33969498 | 0.656254   |
| sp P55145 MANF_HUMAN      | 0.34036064 | 1.1932944  |
| sp P62910 RL32_HUMAN      | 0.34047318 | 1.1932944  |
| sp P55058 PLTP_HUMAN      | 0.34212875 | 1.1932944  |
| sp Q7L1Q6-2 BZW1_HUMAN    | 0.3424816  | 1.2773042  |
| sp O15067 PUR4_HUMAN      | 0.3431015  | 0.19149946 |
| sp Q92599-3 SEPT8_HUMAN   | 0.34591866 | 1.1932944  |
| sp A0A0C4DH38 HV551_HUMAN | 0.3508091  | 1.1932944  |
| sp Q86UX2-2 ITIH5_HUMAN   | 0.3509674  | 1.1932944  |
| sp Q66K74-2 MAP1S_HUMAN   | 0.3526907  | 1.1932944  |
| sp O76074-2 PDE5A_HUMAN   | 0.35488987 | 1.0301651  |
| sp Q8TCD5 NT5C_HUMAN      | 0.36183548 | 1.1932944  |
| sp P50135 HNMT_HUMAN      | 0.36248398 | 1.1932944  |
| sp P02533 K1C14_HUMAN     | 0.36699486 | 1.1932944  |
| sp P16104 H2AX_HUMAN      | 0.38312817 | 0          |
| sp P30711 GSTT1_HUMAN     | 0.38586044 | 1.1505735  |
| sp Q9GZM7-3 TINAL_HUMAN   | 0.3895607  | 1.1932944  |
| sp Q96AY3 FKB10_HUMAN     | 0.39074326 | 1.1932944  |
| sp Q9C0B1 FTO_HUMAN       | 0.39145374 | 1.1932944  |
| sp P47895 AL1A3_HUMAN     | 0.3915739  | 0.656254   |

|                           |            |            |
|---------------------------|------------|------------|
| sp O94788-3 AL1A2_HUMAN   | 0.39335442 | 0.656254   |
| sp P04406 G3P_HUMAN       | 0.4095478  | 0.656254   |
| sp Q01518 CAP1_HUMAN      | 0.41464996 | 0.656254   |
| sp P01780 HV307_HUMAN     | 0.4202652  | 0.656254   |
| sp Q9HCN8 SDF2L_HUMAN     | 0.4269333  | 1.1932944  |
| sp P09012 SNRPA_HUMAN     | 0.44374275 | 0.6070219  |
| sp Q05315 LEG10_HUMAN     | 0.44470978 | 1.1932944  |
| sp P02461 CO3A1_HUMAN     | 0.4537716  | 1.1932944  |
| sp P62736 ACTA_HUMAN      | 0.45960617 | 0.656254   |
| sp P01619 KV320_HUMAN     | 0.46038246 | 0.656254   |
| sp P40123-2 CAP2_HUMAN    | 0.46378326 | 0.656254   |
| sp O14787-2 TNPO2_HUMAN   | 0.46917534 | 0.656254   |
| sp P69892 HBG2_HUMAN      | 0.46977615 | 0.656254   |
| sp P28161 GSTM2_HUMAN     | 0.4734354  | 0.656254   |
| sp POCG38 POTEI_HUMAN     | 0.48222923 | 0.656254   |
| sp P16144-2 ITB4_HUMAN    | 0.49498558 | 1.1932944  |
| sp Q13247-3 SRSF6_HUMAN   | 0.49838257 | 0.45033538 |
| sp Q96IJ6-2 GMPPA_HUMAN   | 0.50512123 | 1.1932944  |
| sp P62829 RL23_HUMAN      | 0.50683784 | 1.1932944  |
| sp Q15102 PA1B3_HUMAN     | 0.5094795  | 1.1505735  |
| sp P63267 ACTH_HUMAN      | 0.5139313  | 0.656254   |
| sp P46977 STT3A_HUMAN     | 0.5155163  | 1.1932944  |
| sp Q03591 FHR1_HUMAN      | 0.52656937 | 1.1932944  |
| sp P0DOX2 IGA2_HUMAN      | 0.54795265 | 0.91601294 |
| sp O94855-2 SC24D_HUMAN   | 0.548151   | 1.1932944  |
| sp A0A0C4DH29 HV103_HUMAN | 0.57790375 | 0.656254   |
| sp O94804 STK10_HUMAN     | 0.6008053  | 0.7827403  |
| sp Q9Y4G6 TLN2_HUMAN      | 0.62131214 | 0.656254   |
| sp P32456 GBP2_HUMAN      | 0.62660027 | 0.19149946 |
| sp P06310 KV230_HUMAN     | 0.6333065  | 0.656254   |
| sp P42226 STAT6_HUMAN     | 0.63524246 | 0.656254   |
| sp Q9C0E8-4 LNP_HUMAN     | 0.6457863  | 0          |
| sp P30837 AL1B1_HUMAN     | 0.6652775  | 1.1791906  |
| sp O43294 TGFI1_HUMAN     | 0.66576195 | 1.1932944  |
| sp P04062-2 GLCM_HUMAN    | 0.6959076  | 1.1932944  |
| sp P01624 KV315_HUMAN     | 0.7047386  | 1.1932944  |
| sp Q687X5 STEA4_HUMAN     | 0.7505169  | 1.1932944  |
| sp Q9BX97 PLVAP_HUMAN     | 0.758543   | 1.1932944  |
| sp Q08170 SRSF4_HUMAN     | 0.8705864  | 0.656254   |
| sp Q15063-3 POSTN_HUMAN   | 0.8774166  | 1.1932944  |
| sp Q30154 DRB5_HUMAN      | 0.9771919  | 0.656254   |
| sp Q15063-2 POSTN_HUMAN   | 1.0057259  | 0.656254   |
| sp A0A0C4DH25 KVD20_HUMAN | 1.0268784  | 0.656254   |
| sp P01834 IGKC_HUMAN      | 1.1237373  | 1.1932944  |
| sp O76011 KRT34_HUMAN     | 1.1389542  | 0.656254   |

|                           |           |           |
|---------------------------|-----------|-----------|
| sp P0DP03 HV335_HUMAN     | 1.1739845 | 1.1932944 |
| sp A0A0C4DH41 HV461_HUMAN | 1.3298035 | 0.656254  |
| sp Q13976-2 KGP1_HUMAN    | 1.406908  | 0.656254  |
| sp A0A075B6P5 KV228_HUMAN | 1.4804668 | 0.656254  |
