# Supplementary material for: Peptidylarginine deiminase 2 citrullinates MZB1 and promotes the secretion of IgM and IgA
Source: PubMed Central journal article supplement (PMC10716219; doi:10.3389/fimmu.2023.1290585), 2023-11-29
Supplement: DataSheet_6.pdf [file DataSheet_6.pdf]

## Supplemental Table 6: RA-ILD4 vs controls

| Accession #             | Fold Change | p value (-log10) |
|-------------------------|-------------|------------------|
| sp Q15109-10 RAGE_HUMAN | -1.8763103  | 2.1818786        |
| sp Q9NZA1-2 CLIC5_HUMAN | -1.4462833  | 3.5908275        |
| sp P13760 2B14_HUMAN    | -1.4182129  | 1.6960104        |
| sp P22748 CAH4_HUMAN    | -1.39781    | 2.6576471        |
| sp O96009 NAPSA_HUMAN   | -1.3222275  | 2.6576471        |
| sp P12429 ANXA3_HUMAN   | -1.2847366  | 7.665951         |
| sp O95810 CAVN2_HUMAN   | -1.1478958  | 3.7803535        |
| sp P09668 CATH_HUMAN    | -1.1342812  | 4.051346         |
| sp P62805 H4_HUMAN      | -1.1264305  | 6.3204336        |
| sp P12821-2 ACE_HUMAN   | -1.0942383  | 2.6576471        |
| sp P49407-2 ARRB1_HUMAN | -1.0702648  | 2.6576471        |
| sp P05362 ICAM1_HUMAN   | -1.0369568  | 5.869831         |
| sp Q01469 FABP5_HUMAN   | -0.9558582  | 4.051346         |
| sp Q10589-2 BST2_HUMAN  | -0.935112   | 1.6960104        |
| sp P50895 BCAM_HUMAN    | -0.9252377  | 6.7698927        |
| sp Q6NZI2 CAVN1_HUMAN   | -0.9243584  | 6.3204336        |
| sp P11233 RALA_HUMAN    | -0.8924561  | 2.1818786        |
| sp Q9UGT4 SUSD2_HUMAN   | -0.8921204  | 4.051346         |
| sp P51659 DHB4_HUMAN    | -0.8718166  | 12.110734        |
| sp P21397 AOFA_HUMAN    | -0.8706131  | 5.2991114        |
| sp P09467 F16P1_HUMAN   | -0.8620758  | 5.417897         |
| sp Q9Y624 JAM1_HUMAN    | -0.8580589  | 2.6576471        |
| sp P26447 S10A4_HUMAN   | -0.8483505  | 2.6576471        |
| sp P61626 LYSC_HUMAN    | -0.8436203  | 2.6576471        |
| sp P60903 S10AA_HUMAN   | -0.8416977  | 1.6960104        |
| sp Q8WWI1-5 LMO7_HUMAN  | -0.8331699  | 4.873151         |
| sp P35241 RADI_HUMAN    | -0.8298674  | 3.5908275        |
| sp P41218 MNDA_HUMAN    | -0.8036041  | 2.1818786        |
| sp P59665 DEF1_HUMAN    | -0.7842903  | 2.1818786        |
| sp Q13510-2 ASAH1_HUMAN | -0.782917   | 6.3204336        |
| sp P08473 NEP_HUMAN     | -0.7751885  | 1.6960104        |
| sp P05164-3 PERM_HUMAN  | -0.7705879  | 10.685196        |
| sp P56199 ITA1_HUMAN    | -0.7598114  | 6.3204336        |
| sp Q15599-2 NHRF2_HUMAN | -0.7541599  | 2.6576471        |
| sp O43760-2 SNG2_HUMAN  | -0.7535286  | 1.6960104        |
| sp P02792 FRIL_HUMAN    | -0.7494049  | 3.8337784        |
| sp Q07157 ZO1_HUMAN     | -0.7483292  | 4.964395         |
| sp P00167-2 CYB5_HUMAN  | -0.747221   | 2.1818786        |
| sp P07339 CATD_HUMAN    | -0.7462177  | 8.112776         |
| sp P01903 DRA_HUMAN     | -0.7282181  | 2.1818786        |
| sp Q03135 CAV1_HUMAN    | -0.726717   | 2.1818786        |
| sp Q8NF37 PCAT1_HUMAN   | -0.7252331  | 2.0727112        |
| sp P16284-3 PECA1_HUMAN | -0.7139416  | 6.0646477        |

|                         |            |           |
|-------------------------|------------|-----------|
| sp P55290-4 CAD13_HUMAN | -0.7075768 | 2.1818786 |
| sp Q08722-2 CD47_HUMAN  | -0.7018814 | 1.6960104 |
| sp P05091 ALDH2_HUMAN   | -0.6987038 | 11.597818 |
| sp P02786 TFR1_HUMAN    | -0.6983261 | 4.051346  |
| sp Q6YN16 HSDL2_HUMAN   | -0.6957808 | 1.6960104 |
| sp P05109 S10A8_HUMAN   | -0.6911373 | 3.5908275 |
| sp P09110 THIK_HUMAN    | -0.6760807 | 2.1818786 |
| sp P00325 ADH1B_HUMAN   | -0.6486321 | 4.051346  |
| sp P61106 RAB14_HUMAN   | -0.6089516 | 4.964395  |
| sp P23381 SYWC_HUMAN    | -0.6081715 | 6.6615443 |
| sp Q6PIU2-2 NCEH1_HUMAN | -0.6041546 | 2.9807727 |
| sp O00159-3 MYO1C_HUMAN | -0.5983868 | 6.560051  |
| sp P33121-3 ACSL1_HUMAN | -0.5919914 | 2.1818786 |
| sp Q9UHG3 PCYOX_HUMAN   | -0.5882683 | 4.8244376 |
| sp P06702 S10A9_HUMAN   | -0.5822144 | 3.5908275 |
| sp P05107 ITB2_HUMAN    | -0.5678253 | 4.509013  |
| sp Q92817 EVPL_HUMAN    | -0.5635586 | 5.505251  |
| sp P05556 ITB1_HUMAN    | -0.5578499 | 10.337908 |
| sp Q9NZN4 EHD2_HUMAN    | -0.5495834 | 8.079533  |
| sp P04040 CATA_HUMAN    | -0.5422745 | 10.295993 |
| sp P26440 IVD_HUMAN     | -0.5417919 | 1.6960104 |
| sp P26038 MOES_HUMAN    | -0.5404587 | 14.55665  |
| sp Q02318 CP27A_HUMAN   | -0.5314999 | 1.6960104 |
| sp P51149 RAB7A_HUMAN   | -0.5314236 | 4.964395  |
| sp P09960 LKHA4_HUMAN   | -0.5247154 | 9.748629  |
| sp P20160 CAP7_HUMAN    | -0.5222836 | 1.6960104 |
| sp P09758 TACD2_HUMAN   | -0.5166416 | 2.1818786 |
| sp P07988 PSPB_HUMAN    | -0.5127544 | 3.5908275 |
| sp P42765 THIM_HUMAN    | -0.5087395 | 5.5742316 |
| sp P50225 ST1A1_HUMAN   | -0.5047188 | 1.6960104 |
| sp Q9H0U4 RAB1B_HUMAN   | -0.4991264 | 1.6960104 |
| sp P31949 S10AB_HUMAN   | -0.4925346 | 2.6576471 |
| sp P12111-2 CO6A3_HUMAN | -0.4890022 | 2.8384566 |
| sp P20645 MPRD_HUMAN    | -0.487114  | 1.6960104 |
| sp O60437 PEPL_HUMAN    | -0.4855194 | 14.808462 |
| sp Q86Y82 STX12_HUMAN   | -0.4777937 | 1.9951487 |
| sp Q8IV08 PLD3_HUMAN    | -0.4744377 | 1.6960104 |
| sp O60504-2 VINEX_HUMAN | -0.4704742 | 2.6576471 |
| sp Q7Z406 MYH14_HUMAN   | -0.467144  | 9.577684  |
| sp O15247 CLIC2_HUMAN   | -0.4659996 | 3.1266599 |
| sp P23193-2 TCEA1_HUMAN | -0.4631729 | 1.6960104 |
| sp P04179-4 SODM_HUMAN  | -0.4603348 | 3.1266599 |
| sp Q14118 DAG1_HUMAN    | -0.4579563 | 1.6960104 |
| sp Q15907-2 RB11B_HUMAN | -0.456152  | 3.5908275 |
| sp Q6YHK3 CD109_HUMAN   | -0.4540329 | 4.509013  |

|                          |            |           |
|--------------------------|------------|-----------|
| sp O15230 LAMA5_HUMAN    | -0.4516983 | 5.2716713 |
| sp P40121 CAPG_HUMAN     | -0.4441738 | 4.873151  |
| sp P05026-2 AT1B1_HUMAN  | -0.4392281 | 2.6576471 |
| sp P59998 ARPC4_HUMAN    | -0.4386444 | 1.8444856 |
| sp P08572 CO4A2_HUMAN    | -0.4343147 | 1.867911  |
| sp Q9NTX5-6 ECHD1_HUMAN  | -0.4341583 | 2.9091687 |
| sp Q9UL25 RAB21_HUMAN    | -0.4336624 | 2.6576471 |
| sp P43304 GPDM_HUMAN     | -0.4303513 | 3.5908275 |
| sp P13284 GILT_HUMAN     | -0.4261856 | 1.6960104 |
| sp P02769 ALBU_BOVIN     | -0.4240131 | 3.7246199 |
| sp Q13228-4 SBP1_HUMAN   | -0.4237785 | 11.943951 |
| sp P16671-4 CD36_HUMAN   | -0.4223003 | 2.1818786 |
| sp P09601 HMOX1_HUMAN    | -0.4217701 | 1.3815327 |
| sp P36543-2 VATE1_HUMAN  | -0.4207859 | 1.6960104 |
| sp P15586-2 GNS_HUMAN    | -0.4155407 | 1.6960104 |
| sp P11047 LAMC1_HUMAN    | -0.4139519 | 10.176739 |
| sp P10253 LYAG_HUMAN     | -0.4128494 | 3.1266599 |
| sp P04080 CYTB_HUMAN     | -0.4122162 | 1.6960104 |
| sp P49913 CAMP_HUMAN     | -0.4119186 | 1.6960104 |
| sp Q99536 VAT1_HUMAN     | -0.4108467 | 4.2870226 |
| sp P17213 BPI_HUMAN      | -0.4105015 | 1.9647322 |
| sp Q16698-2 DECR_HUMAN   | -0.4069099 | 4.509013  |
| sp P0DP25 CALM3_HUMAN    | -0.406414  | 3.5908275 |
| sp P14780 MMP9_HUMAN     | -0.4057999 | 2.768635  |
| sp P08729 K2C7_HUMAN     | -0.4054318 | 13.799253 |
| sp P51688 SPHM_HUMAN     | -0.4054241 | 1.8604537 |
| sp P13987-2 CD59_HUMAN   | -0.4048805 | 1.6960104 |
| sp P10301 RRAS_HUMAN     | -0.4021626 | 1.6960104 |
| sp Q99715-4 COCA1_HUMAN  | -0.4001656 | 1.6960104 |
| sp P14543-2 NID1_HUMAN   | -0.3990078 | 7.665951  |
| sp P51648-2 AL3A2_HUMAN  | -0.3987465 | 4.051346  |
| sp Q27J81-2 INF2_HUMAN   | -0.3943968 | 1.4104178 |
| sp Q9Y3D6 FIS1_HUMAN     | -0.3936567 | 1.6960104 |
| sp O95340-2 PAPS2_HUMAN  | -0.3915939 | 2.1818786 |
| sp Q96TC7 RMD3_HUMAN     | -0.3905621 | 1.6960104 |
| sp Q9UBQ0-2 VPS29_HUMAN  | -0.3890362 | 1.6960104 |
| sp P49327 FAS_HUMAN      | -0.3887196 | 10.290007 |
| sp P13797 PLST_HUMAN     | -0.3857708 | 5.856767  |
| sp O95833 CLIC3_HUMAN    | -0.3826351 | 1.6960104 |
| sp P62987 RL40_HUMAN     | -0.38134   | 1.8444856 |
| sp P05141 ADT2_HUMAN     | -0.3804932 | 2.6576471 |
| sp Q6WCQ1-2 MPRIIP_HUMAN | -0.379633  | 2.7472508 |
| sp P07355-2 ANXA2_HUMAN  | -0.377758  | 4.628043  |
| sp P55268 LAMB2_HUMAN    | -0.3772316 | 8.569753  |
| sp P36957 ODO2_HUMAN     | -0.373621  | 4.4116287 |

|                         |            |           |
|-------------------------|------------|-----------|
| sp P07910-2 HNRPC_HUMAN | -0.3729038 | 2.1818786 |
| sp O75348 VATG1_HUMAN   | -0.3720017 | 1.6960104 |
| sp P05534 1A24_HUMAN    | -0.3719826 | 1.6960104 |
| sp Q96TA1-2 NIBL1_HUMAN | -0.3713303 | 3.103845  |
| sp P50148 GNAQ_HUMAN    | -0.3709412 | 2.1818786 |
| sp P27105 STOM_HUMAN    | -0.3703537 | 4.789934  |
| sp P51148-2 RAB5C_HUMAN | -0.3673286 | 1.6960104 |
| sp A6NMZ7 CO6A6_HUMAN   | -0.3658981 | 3.9658737 |
| sp Q14344 GNA13_HUMAN   | -0.364521  | 2.1818786 |
| sp P61421 VA0D1_HUMAN   | -0.3624477 | 3.5908275 |
| sp P13796 PLSL_HUMAN    | -0.3598614 | 11.115791 |
| sp P13804 ETFA_HUMAN    | -0.3589592 | 4.509013  |
| sp Q16836-3 HCDH_HUMAN  | -0.3562756 | 1.4104178 |
| sp Q86VB7-2 C163A_HUMAN | -0.3545952 | 8.558914  |
| sp P49593-2 PPM1F_HUMAN | -0.3519402 | 2.1818786 |
| sp Q99439 CNN2_HUMAN    | -0.3515797 | 1.6997428 |
| sp O60234 GMFG_HUMAN    | -0.3505001 | 1.6960104 |
| sp P30048-2 PRDX3_HUMAN | -0.3480492 | 2.6576471 |
| sp P62937 PPIA_HUMAN    | -0.3432598 | 1.6960104 |
| sp P30040 ERP29_HUMAN   | -0.342123  | 2.9807727 |
| sp P24752 THIL_HUMAN    | -0.3417397 | 4.890839  |
| sp P20340-2 RAB6A_HUMAN | -0.3415661 | 3.8337784 |
| sp P38606 VATA_HUMAN    | -0.3400993 | 4.760296  |
| sp P84103-2 SRSF3_HUMAN | -0.3383122 | 1.7165122 |
| sp P18428 LBP_HUMAN     | -0.3371124 | 1.6960104 |
| sp O43491 E41L2_HUMAN   | -0.3342419 | 3.760603  |
| sp Q13740-2 CD166_HUMAN | -0.3339768 | 4.5763893 |
| sp P62820 RAB1A_HUMAN   | -0.3310661 | 2.1818786 |
| sp P35221 CTNA1_HUMAN   | -0.3278141 | 9.457676  |
| sp P22307-8 NLTP_HUMAN  | -0.3261461 | 1.6960104 |
| sp P17931 LEG3_HUMAN    | -0.3258095 | 2.6576471 |
| sp P23528 COF1_HUMAN    | -0.3257999 | 4.964395  |
| sp P43121 MUC18_HUMAN   | -0.3249073 | 4.051346  |
| sp P84095 RHOG_HUMAN    | -0.3198948 | 1.6960104 |
| sp Q13011 ECH1_HUMAN    | -0.3188019 | 4.964395  |
| sp Q99729-3 ROAA_HUMAN  | -0.3173122 | 2.9091687 |
| sp P0DPI2-2 GAL3A_HUMAN | -0.317009  | 1.6960104 |
| sp P60983 GMFB_HUMAN    | -0.3119202 | 1.6960104 |
| sp P25774 CATS_HUMAN    | -0.3104687 | 1.6960104 |
| sp Q02818 NUCB1_HUMAN   | -0.3103485 | 4.964395  |
| sp P48163-2 MAOX_HUMAN  | -0.3096685 | 1.6960104 |
| sp Q6NUK1-2 SCMC1_HUMAN | -0.309372  | 2.4829872 |
| sp Q15942 ZYX_HUMAN     | -0.3068924 | 4.051346  |
| sp Q53GQ0 DHB12_HUMAN   | -0.3059387 | 1.6960104 |
| sp P61604 CH10_HUMAN    | -0.3054676 | 3.1266599 |

|                         |            |            |
|-------------------------|------------|------------|
| sp Q16555 DPYL2_HUMAN   | -0.3047829 | 6.5560675  |
| sp P11310-2 ACADM_HUMAN | -0.3035774 | 4.051346   |
| sp P60953 CDC42_HUMAN   | -0.3026238 | 2.432837   |
| sp P54819-2 KAD2_HUMAN  | -0.3022232 | 1.6960104  |
| sp P07954-2 FUMH_HUMAN  | -0.2999878 | 2.3143692  |
| sp Q5SSJ5-2 HP1B3_HUMAN | -0.2999649 | 2.1818786  |
| sp Q9H4M9 EHD1_HUMAN    | -0.2997551 | 2.7472508  |
| sp P80188 NGAL_HUMAN    | -0.2996826 | 2.3047035  |
| sp O43707 ACTN4_HUMAN   | -0.2959995 | 14.9131975 |
| sp P07686 HEXB_HUMAN    | -0.2959213 | 2.9807727  |
| sp Q92597 NDRG1_HUMAN   | -0.2957058 | 1.3815327  |
| sp P99999 CYC_HUMAN     | -0.2956009 | 2.1818786  |
| sp P52566 GDIR2_HUMAN   | -0.2955513 | 3.1266599  |
| sp P30740 ILEU_HUMAN    | -0.2954063 | 3.342776   |
| sp O75390 CISY_HUMAN    | -0.2953606 | 3.7395706  |
| sp O75955 FLOT1_HUMAN   | -0.2937965 | 4.4923797  |
| sp O43837 IDH3B_HUMAN   | -0.2935677 | 1.6960104  |
| sp Q02252-2 MMSA_HUMAN  | -0.2928391 | 1.9190748  |
| sp P07942 LAMB1_HUMAN   | -0.2908382 | 6.016212   |
| sp P51572-2 BAP31_HUMAN | -0.2901135 | 3.5908275  |
| sp Q00577 PURA_HUMAN    | -0.2882156 | 2.6576471  |
| sp Q6UWY5 OLFL1_HUMAN   | -0.2868023 | 3.412591   |
| sp O95865 DDAH2_HUMAN   | -0.286129  | 2.0598862  |
| sp Q969G5 CAVN3_HUMAN   | -0.2855263 | 1.6960104  |
| sp P37837 TALDO_HUMAN   | -0.2841549 | 7.4078336  |
| sp P35222 CTNB1_HUMAN   | -0.2827263 | 2.2613342  |
| sp Q96MM6 HS12B_HUMAN   | -0.2817917 | 1.4050349  |
| sp P27361 MK03_HUMAN    | -0.2817192 | 1.4104178  |
| sp P40926 MDHM_HUMAN    | -0.2812653 | 6.412339   |
| sp Q15417 CNN3_HUMAN    | -0.2805634 | 1.6960104  |
| sp O75367-2 H2AY_HUMAN  | -0.2798977 | 3.0251918  |
| sp Q9P0V9-2 SEP10_HUMAN | -0.277729  | 1.9190748  |
| sp Q16658 FSCN1_HUMAN   | -0.2773457 | 5.0928617  |
| sp Q04917 1433F_HUMAN   | -0.2760124 | 4.3581686  |
| sp Q9H223 EHD4_HUMAN    | -0.2748432 | 2.977915   |
| sp Q9UPN3 MACF1_HUMAN   | -0.2719307 | 4.2386756  |
| sp O15144 ARPC2_HUMAN   | -0.2697754 | 3.1266599  |
| sp P09497-2 CLCB_HUMAN  | -0.268919  | 2.1818786  |
| sp P08311 CATG_HUMAN    | -0.2675076 | 4.051346   |
| sp Q16853 AOC3_HUMAN    | -0.2653198 | 5.4738517  |
| sp Q9HDC9 APMAP_HUMAN   | -0.2633972 | 5.5196576  |
| sp Q9UHB6-4 LIMA1_HUMAN | -0.2613297 | 1.5646582  |
| sp P11413-2 G6PD_HUMAN  | -0.2611218 | 2.7685447  |
| sp Q00765 REEP5_HUMAN   | -0.2595348 | 3.1266599  |
| sp P23141-2 EST1_HUMAN  | -0.2594585 | 8.994744   |

|                          |            |           |
|--------------------------|------------|-----------|
| sp P62873 GBB1_HUMAN     | -0.2592945 | 3.342776  |
| sp Q9UGI8-2 TES_HUMAN    | -0.2571316 | 2.7685447 |
| sp Q9P0L0-2 VAPA_HUMAN   | -0.2562065 | 2.9807727 |
| sp O14950 ML12B_HUMAN    | -0.2557735 | 1.9647322 |
| sp P08575-10 PTPRC_HUMAN | -0.2533054 | 4.051346  |
| sp O15511 ARPC5_HUMAN    | -0.2533035 | 1.3815327 |
| sp Q9HCC0 MCCB_HUMAN     | -0.2531147 | 1.6092666 |
| sp Q16363-2 LAMA4_HUMAN  | -0.2508469 | 4.403177  |
| sp P09622 DLDH_HUMAN     | -0.2505989 | 3.7395706 |
| sp P16219 ACADS_HUMAN    | -0.2498417 | 2.6576471 |
| sp P02750 A2GL_HUMAN     | -0.2494125 | 1.3080103 |
| sp P28074 PSB5_HUMAN     | -0.2454014 | 1.560883  |
| sp P61020 RAB5B_HUMAN    | -0.2440567 | 1.6960104 |
| sp P53634 CATC_HUMAN     | -0.2434406 | 1.4104178 |
| sp Q9NNW7 TRXR2_HUMAN    | -0.2425518 | 1.7590232 |
| sp Q9NP72 RAB18_HUMAN    | -0.2422981 | 1.9647322 |
| sp Q14019 COTL1_HUMAN    | -0.242096  | 2.4829872 |
| sp P00568 KAD1_HUMAN     | -0.2399063 | 2.556708  |
| sp Q96CX2 KCD12_HUMAN    | -0.2396431 | 5.351797  |
| sp Q9H0W9-2 CK054_HUMAN  | -0.2394218 | 1.560883  |
| sp P21281 VATB2_HUMAN    | -0.2393055 | 3.7273152 |
| sp Q96C19 EFHD2_HUMAN    | -0.2391357 | 1.6960104 |
| sp Q96I99 SUCB2_HUMAN    | -0.2378635 | 2.923088  |
| sp P35232 PHB_HUMAN      | -0.2358513 | 4.789934  |
| sp P09651-3 ROA1_HUMAN   | -0.2349625 | 1.6960104 |
| sp P22061-2 PIMT_HUMAN   | -0.2348919 | 2.1818786 |
| sp Q9Y6N5 SQOR_HUMAN     | -0.2346802 | 3.261252  |
| sp P11215-2 ITAM_HUMAN   | -0.2338638 | 2.151766  |
| sp Q06830 PRDX1_HUMAN    | -0.2330494 | 5.338249  |
| sp P52565 GDIR1_HUMAN    | -0.232851  | 3.5908275 |
| sp P25788-2 PSA3_HUMAN   | -0.2307301 | 2.6576471 |
| sp P43490 NAMPT_HUMAN    | -0.2307186 | 6.7073655 |
| sp P46939-2 UTRO_HUMAN   | -0.2305641 | 5.8330364 |
| sp P21796 VDAC1_HUMAN    | -0.2300644 | 2.9462817 |
| sp P60660-2 MYL6_HUMAN   | -0.2294884 | 3.671968  |
| sp Q15365 PCBP1_HUMAN    | -0.2289505 | 2.6997027 |
| sp P22695 QCR2_HUMAN     | -0.2282982 | 2.7472508 |
| sp P10606 COX5B_HUMAN    | -0.2250004 | 1.6960104 |
| sp P09917 LOX5_HUMAN     | -0.2249355 | 2.3143692 |
| sp P29401-2 TKT_HUMAN    | -0.2247963 | 9.7664795 |
| sp Q14103-3 HNRPD_HUMAN  | -0.2246933 | 3.9141645 |
| sp Q9ULV4-3 COR1C_HUMAN  | -0.2236576 | 2.3388627 |
| sp Q9UIJ7 KAD3_HUMAN     | -0.2230701 | 3.1266599 |
| sp P35237 SPB6_HUMAN     | -0.2210293 | 4.2515793 |
| sp P08648 ITA5_HUMAN     | -0.2198601 | 1.6960104 |

|                         |            |           |
|-------------------------|------------|-----------|
| sp P62993 GRB2_HUMAN    | -0.2172852 | 1.9413493 |
| sp P09211 GSTP1_HUMAN   | -0.2152176 | 1.6587203 |
| sp P06737-2 PYGL_HUMAN  | -0.2148209 | 5.1043024 |
| sp P25786-2 PSA1_HUMAN  | -0.2137871 | 4.865345  |
| sp Q9HBL0 TENS1_HUMAN   | -0.2134819 | 1.9681813 |
| sp P63092-3 GNAS2_HUMAN | -0.2113724 | 1.7713763 |
| sp Q9H3N1 TMX1_HUMAN    | -0.2098579 | 1.4104178 |
| sp Q04760-2 LGUL_HUMAN  | -0.2097931 | 1.4716977 |
| sp Q9H2D6-2 TARA_HUMAN  | -0.2097054 | 3.4656596 |
| sp O00764-2 PDXK_HUMAN  | -0.2090864 | 3.1266599 |
| sp Q16881-2 TRXR1_HUMAN | -0.2088242 | 2.1918545 |
| sp P06733 ENOA_HUMAN    | -0.2085266 | 1.3563709 |
| sp P16435 NCPR_HUMAN    | -0.2068176 | 2.816493  |
| sp Q00839 HNRPU_HUMAN   | -0.2059403 | 2.5602834 |
| sp P24539 AT5F1_HUMAN   | -0.2047844 | 3.342776  |
| sp P62258 1433E_HUMAN   | -0.2045002 | 2.1818786 |
| sp P09382 LEG1_HUMAN    | -0.2036724 | 3.8106754 |
| sp P61019 RAB2A_HUMAN   | -0.2033558 | 2.817951  |
| sp P47755 CAZA2_HUMAN   | -0.2032661 | 4.005173  |
| sp P13073 COX41_HUMAN   | -0.201416  | 1.6960104 |
| sp Q00325-2 MPCP_HUMAN  | -0.2010212 | 2.4982266 |
| sp P50213 IDH3A_HUMAN   | -0.2006645 | 2.4982266 |
| sp P67936 TPM4_HUMAN    | -0.197794  | 2.4945192 |
| sp P37802 TAGL2_HUMAN   | -0.1976986 | 2.3660793 |
| sp P43034 LIS1_HUMAN    | -0.197506  | 1.827201  |
| sp Q9Y6W5 WASF2_HUMAN   | -0.1974068 | 1.6960104 |
| sp P27487 DPP4_HUMAN    | -0.1973724 | 1.9647322 |
| sp Q9BRA2 TXD17_HUMAN   | -0.1973686 | 1.5646582 |
| sp P35914 HMGCL_HUMAN   | -0.1966248 | 2.6576471 |
| sp P53007 TXTP_HUMAN    | -0.1963253 | 2.4829872 |
| sp P22626 ROA2_HUMAN    | -0.1962147 | 4.3709893 |
| sp P48681 NEST_HUMAN    | -0.1960888 | 1.9828281 |
| sp Q13561-2 DCTN2_HUMAN | -0.1952591 | 4.797763  |
| sp P08571 CD14_HUMAN    | -0.1950665 | 1.9647322 |
| sp P61158 ARP3_HUMAN    | -0.1948128 | 5.815884  |
| sp P49748-2 ACADV_HUMAN | -0.1937447 | 7.5214024 |
| sp P46108 CRK_HUMAN     | -0.1900902 | 2.9807727 |
| sp P46976-2 GLYG_HUMAN  | -0.1883621 | 1.6997428 |
| sp P06576 ATPB_HUMAN    | -0.1881218 | 8.452712  |
| sp Q99623 PHB2_HUMAN    | -0.1877079 | 2.5385003 |
| sp P38646 GRP75_HUMAN   | -0.1856461 | 5.089066  |
| sp Q9NYL9 TMOD3_HUMAN   | -0.1854973 | 1.7590232 |
| sp P19338 NUCL_HUMAN    | -0.1800919 | 6.412339  |
| sp P20618 PSB1_HUMAN    | -0.1792908 | 3.342776  |
| sp P39060-1 COIA1_HUMAN | -0.1791649 | 2.2323174 |

|                         |            |           |
|-------------------------|------------|-----------|
| sp Q9NRN5-2 OLFL3_HUMAN | -0.1783733 | 3.5908275 |
| sp P07737 PROF1_HUMAN   | -0.1773605 | 2.4402673 |
| sp O15143 ARC1B_HUMAN   | -0.1772156 | 1.5270832 |
| sp P98160 PGBM_HUMAN    | -0.1764088 | 6.62782   |
| sp Q03252 LMNB2_HUMAN   | -0.1760731 | 7.7913103 |
| sp P10515 ODP2_HUMAN    | -0.1755219 | 1.560883  |
| sp P51858 HDGF_HUMAN    | -0.1724396 | 1.7590232 |
| sp Q92542 NICA_HUMAN    | -0.1720104 | 1.6960104 |
| sp P23246 SFPO_HUMAN    | -0.1719952 | 2.846239  |
| sp P51649-2 SSDH_HUMAN  | -0.171196  | 1.5646582 |
| sp P07858 CATB_HUMAN    | -0.1688271 | 2.12598   |
| sp P18206-2 VINC_HUMAN  | -0.1679058 | 15.95459  |
| sp P05198 IF2A_HUMAN    | -0.1675453 | 2.1818786 |
| sp P07099 HYEP_HUMAN    | -0.166069  | 5.045351  |
| sp O15031 PLXB2_HUMAN   | -0.1653004 | 2.1663873 |
| sp Q8N1G4 LRC47_HUMAN   | -0.165266  | 2.2884321 |
| sp Q86UP2-4 KTN1_HUMAN  | -0.1650467 | 4.40577   |
| sp Q14152 EIF3A_HUMAN   | -0.164113  | 1.6960104 |
| sp P25789 PSA4_HUMAN    | -0.1622791 | 4.033051  |
| sp O00743-3 PPP6_HUMAN  | -0.1605988 | 1.4104178 |
| sp Q13409-3 DC1I2_HUMAN | -0.1597834 | 2.432837  |
| sp Q9UNZ2-5 NSF1C_HUMAN | -0.1594524 | 1.6832623 |
| sp P00367 DHE3_HUMAN    | -0.1575165 | 2.4331102 |
| sp P28066 PSA5_HUMAN    | -0.1564026 | 2.6576471 |
| sp P04275 VWF_HUMAN     | -0.1560917 | 2.8820472 |
| sp P60900 PSA6_HUMAN    | -0.1549072 | 2.7155995 |
| sp P25787 PSA2_HUMAN    | -0.1536369 | 2.653196  |
| sp Q9BS26 ERP44_HUMAN   | -0.1517162 | 2.3143692 |
| sp Q13185 CBX3_HUMAN    | -0.1505776 | 1.5646582 |
| sp P52209-2 6PGD_HUMAN  | -0.1499519 | 2.2158308 |
| sp Q9Y3F4-2 STRAP_HUMAN | -0.1456661 | 1.6960104 |
| sp Q13308-6 PTK7_HUMAN  | -0.1454697 | 1.9647322 |
| sp Q13451 FKBP5_HUMAN   | -0.1447868 | 1.4936475 |
| sp O15127 SCAM2_HUMAN   | -0.1438561 | 1.6960104 |
| sp Q86UX7-2 URP2_HUMAN  | -0.143467  | 2.5880952 |
| sp P05023 AT1A1_HUMAN   | -0.1423473 | 4.7194524 |
| sp P40306 PSB10_HUMAN   | -0.1403656 | 1.4716977 |
| sp P30050 RL12_HUMAN    | -0.1401024 | 1.5646582 |
| sp O15145 ARPC3_HUMAN   | -0.1382332 | 1.6960104 |
| sp O75369-2 FLNB_HUMAN  | -0.1357689 | 6.2336907 |
| sp Q14847 LASP1_HUMAN   | -0.1317062 | 1.4351699 |
| sp P61981 1433G_HUMAN   | -0.1309948 | 1.8992519 |
| sp P30041 PRDX6_HUMAN   | -0.1297951 | 1.9891415 |
| sp P61978-3 HNRPK_HUMAN | -0.1294975 | 2.409984  |
| sp P55072 TERA_HUMAN    | -0.1274414 | 6.0030184 |



|                         |            |           |
|-------------------------|------------|-----------|
| sp Q16543 CDC37_HUMAN   | -0.1263008 | 3.4366283 |
| sp P38919 IF4A3_HUMAN   | -0.1241837 | 1.7703108 |
| sp Q07954 LRP1_HUMAN    | -0.123806  | 3.5392559 |
| sp P62316-2 SMD2_HUMAN  | -0.1189861 | 1.6960104 |
| sp Q99714 HCD2_HUMAN    | -0.1188946 | 2.3388627 |
| sp P11216 PYGB_HUMAN    | -0.118     | 3.0333433 |
| sp P10809 CH60_HUMAN    | -0.1164379 | 1.9237356 |
| sp P00505 AATM_HUMAN    | -0.1139488 | 3.0491316 |
| sp P07237 PDIA1_HUMAN   | -0.1138649 | 8.419361  |
| sp P49720 PSB3_HUMAN    | -0.1126251 | 2.3143692 |
| sp Q9UHQ9 NB5R1_HUMAN   | -0.1091118 | 1.7590232 |
| sp P47756-2 CAPZB_HUMAN | -0.1077042 | 2.2718198 |
| sp O14818 PSA7_HUMAN    | -0.1057358 | 2.9027722 |
| sp P54920 SNAA_HUMAN    | -0.1015854 | 1.7451575 |
| sp Q9Y490 TLN1_HUMAN    | -0.1001263 | 7.125478  |
| sp P22897 MRC1_HUMAN    | -0.0982876 | 3.0253785 |
| sp Q9BSJ8-2 ESYT1_HUMAN | -0.0976658 | 2.2178984 |
| sp O95571 ETHE1_HUMAN   | -0.0972614 | 1.560883  |
| sp Q96AE4-2 FUBP1_HUMAN | -0.0961247 | 1.7451575 |
| sp P21810 PGS1_HUMAN    | -0.0924568 | 1.4262929 |
| sp P13489 RINI_HUMAN    | -0.090992  | 1.9696252 |
| sp P52907 CAZA1_HUMAN   | -0.0904522 | 1.5983955 |
| sp P12109 CO6A1_HUMAN   | -0.0899448 | 3.3101625 |
| sp O95831-3 AIFM1_HUMAN | -0.0880356 | 1.4068714 |
| sp P00387-3 NB5R3_HUMAN | -0.0868492 | 1.7713763 |
| sp P21291 CSRP1_HUMAN   | -0.0811329 | 1.4068714 |
| sp P20700 LMNB1_HUMAN   | -0.074213  | 2.669452  |
| sp P12110 CO6A2_HUMAN   | -0.0720196 | 1.4641514 |
| sp P16157-21 ANK1_HUMAN | -0.0608616 | 1.4278674 |
| sp P21980 TGM2_HUMAN    | -0.050108  | 1.4413939 |
| sp P05783 K1C18_HUMAN   | -0.046957  | 1.9913259 |
| sp P11021 BIP_HUMAN     | 0.05473709 | 1.8804649 |
| sp P04792 HSPB1_HUMAN   | 0.0691433  | 1.9405096 |
| sp Q15746-2 MYLK_HUMAN  | 0.07836533 | 1.3095477 |
| sp P04004 VTNC_HUMAN    | 0.07925606 | 1.3635377 |
| sp P23396 RS3_HUMAN     | 0.08415794 | 2.4802232 |
| sp P11277-2 SPTB1_HUMAN | 0.08441544 | 1.713281  |
| sp P09543-2 CN37_HUMAN  | 0.08536148 | 1.3635377 |
| sp P13010 XRCC5_HUMAN   | 0.0997448  | 1.4413342 |
| sp P13645 K1C10_HUMAN   | 0.10048866 | 1.4202096 |
| sp O60884 DNJA2_HUMAN   | 0.10574341 | 2.1818786 |
| sp P35606 COPB2_HUMAN   | 0.10971069 | 3.7420487 |
| sp P31040 SDHA_HUMAN    | 0.11091423 | 1.5167314 |
| sp Q9Y5Z4 HEBP2_HUMAN   | 0.1117878  | 1.6960104 |
| sp Q9UBX5 FBLN5_HUMAN   | 0.11547279 | 1.6265627 |

|                         |            |           |
|-------------------------|------------|-----------|
| sp P49411 EFTU_HUMAN    | 0.11693955 | 1.804513  |
| sp Q14112-2 NID2_HUMAN  | 0.11881447 | 2.37248   |
| sp P31146 COR1A_HUMAN   | 0.11898613 | 1.6896294 |
| sp P32119 PRDX2_HUMAN   | 0.12033081 | 3.456225  |
| sp P01009 A1AT_HUMAN    | 0.12061882 | 5.919944  |
| sp P05455 LA_HUMAN      | 0.12414932 | 4.051346  |
| sp Q8IZ83-3 A16A1_HUMAN | 0.12590218 | 1.8060131 |
| sp P50914 RL14_HUMAN    | 0.12662125 | 1.6960104 |
| sp Q5EBM0 CMPK2_HUMAN   | 0.12701035 | 1.6960104 |
| sp P51911 CNN1_HUMAN    | 0.12716484 | 1.6587203 |
| sp Q9NYU2-2 UGGG1_HUMAN | 0.12771988 | 1.7791386 |
| sp P49368 TCPG_HUMAN    | 0.13132286 | 2.2371037 |
| sp Q96G03 PGM2_HUMAN    | 0.13406944 | 1.867911  |
| sp Q07960 RHG01_HUMAN   | 0.13558578 | 1.3635377 |
| sp P13611 CSPG2_HUMAN   | 0.13620567 | 1.7697086 |
| sp O14828-2 SCAM3_HUMAN | 0.13633537 | 1.4104178 |
| sp P04196 HRG_HUMAN     | 0.1386795  | 1.5071542 |
| sp P08236-2 BGLR_HUMAN  | 0.13996124 | 2.1818786 |
| sp Q9NZ08-2 ERAP1_HUMAN | 0.14599991 | 1.8060131 |
| sp P46777 RL5_HUMAN     | 0.14676476 | 1.3895186 |
| sp Q15582 BGH3_HUMAN    | 0.14845657 | 3.9748769 |
| sp P61247 RS3A_HUMAN    | 0.15209961 | 2.4829872 |
| sp P23456 Trypsin       | 0.15538788 | 2.987788  |
| sp Q07507 DERM_HUMAN    | 0.15685463 | 2.2385595 |
| sp P05165-2 PCCA_HUMAN  | 0.15688324 | 2.7936864 |
| sp P27338 AOFB_HUMAN    | 0.15852547 | 2.2752137 |
| sp P18124 RL7_HUMAN     | 0.1622467  | 2.3143692 |
| sp Q9Y678 COPG1_HUMAN   | 0.16227913 | 2.4140475 |
| sp P15090 FABP4_HUMAN   | 0.1638794  | 1.9997257 |
| sp P46782 RS5_HUMAN     | 0.1702652  | 1.4278674 |
| sp Q15084-2 PDIA6_HUMAN | 0.17501545 | 3.8108692 |
| sp P04264 K2C1_HUMAN    | 0.17563248 | 4.3733654 |
| sp P62701 RS4X_HUMAN    | 0.17564392 | 2.1818786 |
| sp P07357 CO8A_HUMAN    | 0.17887497 | 1.560883  |
| sp Q9Y2X3 NOP58_HUMAN   | 0.17954445 | 1.7713763 |
| sp P39656-3 OST48_HUMAN | 0.18312836 | 2.400925  |
| sp P21399 ACOC_HUMAN    | 0.18331718 | 1.6405568 |
| sp Q99798 ACON_HUMAN    | 0.18606186 | 2.1260412 |
| sp P51888 PRELP_HUMAN   | 0.1930275  | 5.4389644 |
| sp P07900-2 HS90A_HUMAN | 0.19477654 | 4.4093137 |
| sp P28838-2 AMPL_HUMAN  | 0.1955967  | 6.2617097 |
| sp P46063 RECQ1_HUMAN   | 0.19648743 | 1.4936475 |
| sp P21912 SDHB_HUMAN    | 0.19827461 | 1.4104178 |
| sp O15061 SYNEM_HUMAN   | 0.20263195 | 1.6997428 |
| sp O60763-2 USO1_HUMAN  | 0.20669174 | 2.9318283 |

|                         |            |           |
|-------------------------|------------|-----------|
| sp Q9Y4L1 HYOU1_HUMAN   | 0.2067852  | 3.5053878 |
| sp P62424 RL7A_HUMAN    | 0.20786858 | 2.2323174 |
| sp Q9UHL4 DPP2_HUMAN    | 0.20915985 | 2.987788  |
| sp P35555 FBN1_HUMAN    | 0.2127552  | 7.1820946 |
| sp P32969 RL9_HUMAN     | 0.21372795 | 1.6960104 |
| sp P53618 COPB_HUMAN    | 0.21648026 | 2.9455793 |
| sp Q99873-3 ANM1_HUMAN  | 0.2170639  | 2.3143692 |
| sp P02765 FETUA_HUMAN   | 0.21829796 | 1.560883  |
| sp A1L4H1 SRCRL_HUMAN   | 0.21851921 | 1.4104178 |
| sp P04844 RPN2_HUMAN    | 0.21877575 | 1.9190748 |
| sp P21266 GSTM3_HUMAN   | 0.22295761 | 2.5461748 |
| sp Q96PD5-2 PGRP2_HUMAN | 0.22309685 | 1.4716977 |
| sp P07814 SYEP_HUMAN    | 0.22724724 | 2.044628  |
| sp Q16647 PTGIS_HUMAN   | 0.22934341 | 2.3143692 |
| sp P00915 CAH1_HUMAN    | 0.23254204 | 6.016213  |
| sp P49419-2 AL7A1_HUMAN | 0.23557663 | 4.957485  |
| sp P23219-2 PGH1_HUMAN  | 0.23933029 | 1.5646582 |
| sp Q15124 PGM5_HUMAN    | 0.24077415 | 5.489956  |
| sp P02649 APOE_HUMAN    | 0.24200058 | 1.9986866 |
| sp P08708 RS17_HUMAN    | 0.2457695  | 1.560883  |
| sp Q9BS40 LXN_HUMAN     | 0.2472763  | 1.7590232 |
| sp Q9P2E9 RRBP1_HUMAN   | 0.24790955 | 11.459226 |
| sp P22352 GPX3_HUMAN    | 0.24960709 | 1.6960104 |
| sp Q07065 CKAP4_HUMAN   | 0.2504692  | 7.9042997 |
| sp Q9UBT2 SAE2_HUMAN    | 0.25064087 | 2.1818786 |
| sp P24844 MYL9_HUMAN    | 0.25358582 | 1.6960104 |
| sp P26640 SYVC_HUMAN    | 0.2538948  | 2.653196  |
| sp P04843 RPN1_HUMAN    | 0.25589943 | 7.3409    |
| sp P05156 CFAI_HUMAN    | 0.25873184 | 3.417183  |
| sp P62266 RS23_HUMAN    | 0.2628498  | 1.560883  |
| sp Q9Y3Z3 SAMH1_HUMAN   | 0.26325417 | 3.4253109 |
| sp O60547-2 GMDS_HUMAN  | 0.26397705 | 1.6960104 |
| sp Q9H008 LHPP_HUMAN    | 0.26474285 | 1.6092666 |
| sp Q8N2S1 LTBP4_HUMAN   | 0.26700974 | 3.4805238 |
| sp P55884-2 EIF3B_HUMAN | 0.2679901  | 1.9951487 |
| sp O60831 PRAF2_HUMAN   | 0.26823616 | 1.6960104 |
| sp P67936-2 TPM4_HUMAN  | 0.2710743  | 1.6960104 |
| sp P09493-9 TPM1_HUMAN  | 0.27181244 | 1.6960104 |
| sp O00567 NOP56_HUMAN   | 0.2743225  | 3.5908275 |
| sp Q92896-2 GSLG1_HUMAN | 0.27923203 | 4.051346  |
| sp P53621-2 COPA_HUMAN  | 0.27968788 | 5.4724083 |
| sp O00534 VMA5A_HUMAN   | 0.28222847 | 3.6746628 |
| sp P22314 UBA1_HUMAN    | 0.2824669  | 6.5729823 |
| sp P08670 VIME_HUMAN    | 0.28351784 | 14.398287 |
| sp P02753 RET4_HUMAN    | 0.2837162  | 1.6960104 |

|                         |            |           |
|-------------------------|------------|-----------|
| sp P09493-8 TPM1_HUMAN  | 0.2854805  | 3.4656596 |
| sp P20774 MIME_HUMAN    | 0.28650475 | 2.6576471 |
| sp P13667 PDIA4_HUMAN   | 0.2994175  | 9.884588  |
| sp P43652 AFAM_HUMAN    | 0.3023033  | 3.1629772 |
| sp Q9UMS6-2 SYNP2_HUMAN | 0.30309296 | 2.838374  |
| sp Q7KZF4 SND1_HUMAN    | 0.3034973  | 2.6928825 |
| sp Q96C86 DCPS_HUMAN    | 0.30522537 | 1.6960104 |
| sp P14550 AK1A1_HUMAN   | 0.3059845  | 4.578167  |
| sp O43175 SERA_HUMAN    | 0.31017685 | 2.923088  |
| sp P14625 ENPL_HUMAN    | 0.31710434 | 13.666788 |
| sp P40261 NNMT_HUMAN    | 0.31984138 | 1.4104178 |
| sp Q00341-2 VIGLN_HUMAN | 0.32055855 | 2.1404836 |
| sp P02774-3 VTDB_HUMAN  | 0.3233528  | 7.445339  |
| sp Q8TCJ2 STT3B_HUMAN   | 0.3306694  | 1.6960104 |
| sp Q5TZA2 CROCC_HUMAN   | 0.33731842 | 2.1818786 |
| sp Q14767 LTBP2_HUMAN   | 0.3391304  | 3.0253785 |
| sp P49257 LMAN1_HUMAN   | 0.3395157  | 2.7075508 |
| sp P26373 RL13_HUMAN    | 0.34363365 | 2.1818786 |
| sp Q01995 TAGL_HUMAN    | 0.34490585 | 6.892501  |
| sp P03952 KLKB1_HUMAN   | 0.35798836 | 2.1818786 |
| sp P02766 TTHY_HUMAN    | 0.35956192 | 2.1818786 |
| sp P10909-5 CLUS_HUMAN  | 0.36676407 | 4.964395  |
| sp P02748 CO9_HUMAN     | 0.36956787 | 6.8719745 |
| sp P04217 A1BG_HUMAN    | 0.3714943  | 3.8106754 |
| sp P39023 RL3_HUMAN     | 0.37233925 | 2.1818786 |
| sp P08727 K1C19_HUMAN   | 0.37722778 | 9.893875  |
| sp P39059 COFA1_HUMAN   | 0.3824768  | 2.1818786 |
| sp Q9NR12-2 PDLI7_HUMAN | 0.3890381  | 2.058973  |
| sp P02749 APOH_HUMAN    | 0.39386368 | 1.3567923 |
| sp P28331-2 NDUS1_HUMAN | 0.39700127 | 2.6576471 |
| sp P01019 ANGT_HUMAN    | 0.39979362 | 1.5646582 |
| sp P36578 RL4_HUMAN     | 0.41420937 | 3.5908275 |
| sp P06727 APOA4_HUMAN   | 0.42101288 | 5.727641  |
| sp Q9P2B2 FPRP_HUMAN    | 0.42125893 | 3.1266599 |
| sp P22105-1 TENX_HUMAN  | 0.42806244 | 11.11263  |
| sp Q14192 FHL2_HUMAN    | 0.43423462 | 2.1818786 |
| sp Q14195-2 DPYL3_HUMAN | 0.45190048 | 7.0677576 |
| sp P06681-3 CO2_HUMAN   | 0.45391083 | 1.4278674 |
| sp P05787-2 K2C8_HUMAN  | 0.45598602 | 14.230314 |
| sp P25311 ZA2G_HUMAN    | 0.45905685 | 4.051346  |
| sp P36955 PEDF_HUMAN    | 0.46026993 | 3.8337784 |
| sp P0DOX7 IGK_HUMAN     | 0.46348763 | 2.1818786 |
| sp P62753 RS6_HUMAN     | 0.46616554 | 1.6960104 |
| sp P36269-3 GGT5_HUMAN  | 0.46954727 | 3.1266599 |
| sp P16615 AT2A2_HUMAN   | 0.4719906  | 6.2357526 |

|                         |            |           |
|-------------------------|------------|-----------|
| sp Q14315-2 FLNC_HUMAN  | 0.4813919  | 15.051499 |
| sp P49821-2 NDUV1_HUMAN | 0.48513794 | 3.5908275 |
| sp P23946 CMA1_HUMAN    | 0.48846245 | 2.4829872 |
| sp P04259 K2C6B_HUMAN   | 0.49025345 | 2.1818786 |
| sp P29622 KAIN_HUMAN    | 0.49585724 | 2.6576471 |
| sp P10643 CO7_HUMAN     | 0.49674225 | 4.5635147 |
| sp P19827 ITIH1_HUMAN   | 0.4969883  | 4.517996  |
| sp P07585 PGS2_HUMAN    | 0.49738693 | 5.102962  |
| sp Q9Y265 RUVB1_HUMAN   | 0.5025749  | 4.051346  |
| sp P42224-2 STAT1_HUMAN | 0.50473976 | 2.6576471 |
| sp P00488 F13A_HUMAN    | 0.5065956  | 5.856767  |
| sp P0DOX2 IGA2_HUMAN    | 0.508091   | 1.6960104 |
| sp P62241 RS8_HUMAN     | 0.51481247 | 2.9807727 |
| sp Q12765 SCRN1_HUMAN   | 0.52611923 | 1.9647322 |
| sp Q9NR45 SIAS_HUMAN    | 0.52801895 | 4.964395  |
| sp P80303-2 NUCB2_HUMAN | 0.5286598  | 2.1818786 |
| sp P13671 CO6_HUMAN     | 0.53061676 | 1.6960104 |
| sp P51884 LUM_HUMAN     | 0.53601074 | 8.112776  |
| sp P01008 ANT3_HUMAN    | 0.53883743 | 8.061325  |
| sp Q9Y230 RUVB2_HUMAN   | 0.56750107 | 6.3204336 |
| sp Q00796 DH5O_HUMAN    | 0.5684681  | 1.6960104 |
| sp Q13162 PRDX4_HUMAN   | 0.5702286  | 3.1266599 |
| sp P20591 MX1_HUMAN     | 0.578125   | 2.6576471 |
| sp P02675 FIBB_HUMAN    | 0.5934715  | 9.769767  |
| sp P07451 CAH3_HUMAN    | 0.5950985  | 1.9997257 |
| sp P01031 CO5_HUMAN     | 0.6045685  | 6.2111583 |
| sp P02679-2 FIBG_HUMAN  | 0.6104412  | 6.878014  |
| sp P19823 ITIH2_HUMAN   | 0.61401176 | 5.417897  |
| sp P02790 HEMO_HUMAN    | 0.64281464 | 7.831889  |
| sp P00450 CERU_HUMAN    | 0.64979553 | 10.83602  |
| sp P04114 APOB_HUMAN    | 0.6733074  | 12.475591 |
| sp P00748 FA12_HUMAN    | 0.679533   | 1.6960104 |
| sp P01023 A2MG_HUMAN    | 0.68457985 | 14.386388 |
| sp P01042-2 KNG1_HUMAN  | 0.68932724 | 7.2183566 |
| sp Q8NBS9 TXND5_HUMAN   | 0.71315575 | 7.665951  |
| sp P02652-2 APOA2_HUMAN | 0.7177887  | 3.1266599 |
| sp P00734 THR3_HUMAN    | 0.7510433  | 6.314202  |
| sp Q9BW30 TPPP3_HUMAN   | 0.76011086 | 3.1266599 |
| sp Q05707 COEA1_HUMAN   | 0.77067566 | 14.507432 |
| sp P02671 FIBA_HUMAN    | 0.77326393 | 11.667864 |
| sp P00751 CFAB_HUMAN    | 0.7750225  | 10.241625 |
| sp Q8WU39 MZB1_HUMAN    | 0.8037529  | 3.1266599 |
| sp Q9NYL4 FKB11_HUMAN   | 0.82024765 | 1.6960104 |
| sp P08123 CO1A2_HUMAN   | 0.82531166 | 2.6576471 |
| sp P13647 K2C5_HUMAN    | 0.8616257  | 6.7698927 |

|                         |            |           |
|-------------------------|------------|-----------|
| sp P08603 CFAH_HUMAN    | 0.8723297  | 15.35253  |
| sp P00747 PLMN_HUMAN    | 0.9109764  | 6.7698927 |
| sp P27169 PON1_HUMAN    | 0.9162636  | 1.6960104 |
| sp P17661 DESM_HUMAN    | 0.94592094 | 14.840647 |
| sp P01859 IGHG2_HUMAN   | 0.95537186 | 4.509013  |
| sp P04003 C4BPA_HUMAN   | 0.9865322  | 5.869831  |
| sp P02647 APOA1_HUMAN   | 1.0032425  | 13.420564 |
| sp P01876 IGHA1_HUMAN   | 1.0350742  | 4.509013  |
| sp P01871-2 IGHM_HUMAN  | 1.0938072  | 2.1818786 |
| sp P05546 HEP2_HUMAN    | 1.094387   | 2.6576471 |
| sp P0DOY3 IGLC3_HUMAN   | 1.1071568  | 2.1818786 |
| sp P02452 CO1A1_HUMAN   | 1.1218872  | 2.1800864 |
| sp P0DOX8 IGL1_HUMAN    | 1.1790733  | 2.1818786 |
| sp Q8TDL5 BPIB1_HUMAN   | 1.2697239  | 2.044628  |
| sp P0DOX5 IGG1_HUMAN    | 1.2765732  | 4.964395  |
| sp Q9BXN1 ASPN_HUMAN    | 1.3565903  | 2.6576471 |
| sp P01860 IGHG3_HUMAN   | 1.5645103  | 2.6576471 |
| sp P15088 CBPA3_HUMAN   | 1.9092846  | 2.1818786 |
| sp Q9BW04 SARG_HUMAN    | -1.9911194 | 1.1932944 |
| sp P04229 2B11_HUMAN    | -1.6544609 | 0.656254  |
| sp O00757 F16P2_HUMAN   | -1.3538017 | 1.1932944 |
| sp P13686 PPA5_HUMAN    | -1.2505798 | 1.2773042 |
| sp P37235 HPCL1_HUMAN   | -1.1461496 | 0.656254  |
| sp P08246 ELNE_HUMAN    | -1.102642  | 1.1932944 |
| sp P33151 CADH5_HUMAN   | -1.0502663 | 1.1932944 |
| sp Q93077 H2A1C_HUMAN   | -1.0113544 | 1.1932944 |
| sp Q16777 H2A2C_HUMAN   | -1.0048599 | 1.1932944 |
| sp P28330 ACADL_HUMAN   | -0.9859142 | 1.1932944 |
| sp P08263 GSTA1_HUMAN   | -0.9842415 | 0         |
| sp O00592-2 PODXL_HUMAN | -0.9434471 | 1.1932944 |
| sp P54108-2 CRIS3_HUMAN | -0.8950558 | 0.656254  |
| sp Q9UHN6-2 CEIP2_HUMAN | -0.883255  | 1.1932944 |
| sp P20702 ITAX_HUMAN    | -0.8786964 | 0.656254  |
| sp Q01955 CO4A3_HUMAN   | -0.8611202 | 1.1932944 |
| sp Q14956-2 GPNMB_HUMAN | -0.820713  | 1.1932944 |
| sp P16422 EPCAM_HUMAN   | -0.8109779 | 1.1932944 |
| sp Q03135-2 CAV1_HUMAN  | -0.8097458 | 0.656254  |
| sp Q13751 LAMB3_HUMAN   | -0.8041515 | 1.2773042 |
| sp P63218 GBG5_HUMAN    | -0.7971249 | 1.1932944 |
| sp P29972-2 AQP1_HUMAN  | -0.7817631 | 1.1932944 |
| sp Q9UDY2-3 ZO2_HUMAN   | -0.7722426 | 1.1932944 |
| sp P02462 CO4A1_HUMAN   | -0.7241011 | 1.1505735 |
| sp Q9NPY3 C1QR1_HUMAN   | -0.7229805 | 1.1932944 |
| sp Q08209-5 PP2BA_HUMAN | -0.7123013 | 0.7827403 |
| sp O76041-2 NEBL_HUMAN  | -0.69207   | 0.656254  |

|                         |            |            |
|-------------------------|------------|------------|
| sp Q96BM9 ARL8A_HUMAN   | -0.6917801 | 0.656254   |
| sp O95837 GNA14_HUMAN   | -0.6908684 | 0.656254   |
| sp P02741 CRP_HUMAN     | -0.6864872 | 1.1932944  |
| sp P24158 PRTN3_HUMAN   | -0.6850205 | 1.1505735  |
| sp Q15286 RAB35_HUMAN   | -0.6650314 | 0.656254   |
| sp P04440 DPB1_HUMAN    | -0.6330109 | 1.1932944  |
| sp Q9UPQ0 LIMC1_HUMAN   | -0.6275845 | 1.2392054  |
| sp P06703 S10A6_HUMAN   | -0.614624  | 1.1932944  |
| sp O43795-2 MYO1B_HUMAN | -0.6130638 | 1.1932944  |
| sp P16403 H12_HUMAN     | -0.5995483 | 0.656254   |
| sp P06396-2 GELS_HUMAN  | -0.589962  | 0.656254   |
| sp Q9NVJ2 ARL8B_HUMAN   | -0.5896835 | 1.1932944  |
| sp Q9H8L6 MMRN2_HUMAN   | -0.5797596 | 0.7827403  |
| sp Q9H2U2-3 IPYR2_HUMAN | -0.576313  | 0.656254   |
| sp P51606-2 RENBP_HUMAN | -0.5749989 | 1.1932944  |
| sp P11279 LAMP1_HUMAN   | -0.5684185 | 1.1932944  |
| sp P51153 RAB13_HUMAN   | -0.5536308 | 0.656254   |
| sp P61916-2 NPC2_HUMAN  | -0.5519371 | 1.1932944  |
| sp P08962-2 CD63_HUMAN  | -0.5452595 | 0.7827403  |
| sp P20292 AL5AP_HUMAN   | -0.5372086 | 0.91601294 |
| sp Q08431 MFGM_HUMAN    | -0.5339108 | 1.1505735  |
| sp P36542-2 ATPG_HUMAN  | -0.5288067 | 0.656254   |
| sp P28799-3 GRN_HUMAN   | -0.5285082 | 0.2178309  |
| sp P01920 DQB1_HUMAN    | -0.526331  | 1.1932944  |
| sp P22894 MMP8_HUMAN    | -0.5245647 | 0.19149946 |
| sp P48509 CD151_HUMAN   | -0.5219727 | 1.1932944  |
| sp O60271-4 JIP4_HUMAN  | -0.5205402 | 1.0301651  |
| sp Q7Z4I7-3 LIMS2_HUMAN | -0.5158291 | 1.1932944  |
| sp P11717 MPRI_HUMAN    | -0.507185  | 1.1932944  |
| sp P06753-6 TPM3_HUMAN  | -0.5033169 | 0.656254   |
| sp Q9HD89 RETN_HUMAN    | -0.5021477 | 1.1932944  |
| sp Q6DN03 H2B2C_HUMAN   | -0.4989319 | 1.1932944  |
| sp Q9NVD7 PARVA_HUMAN   | -0.4988899 | 0.7827403  |
| sp Q9UBR2 CATZ_HUMAN    | -0.4966736 | 1.1932944  |
| sp Q9BZF9-2 UACA_HUMAN  | -0.4929657 | 0.7827403  |
| sp P01111 RASN_HUMAN    | -0.4795322 | 0.656254   |
| sp Q8NBQ5 DHB11_HUMAN   | -0.4729729 | 1.1932944  |
| sp P61601 NCALD_HUMAN   | -0.4726429 | 0.656254   |
| sp A6NMY6 AXA2L_HUMAN   | -0.4706039 | 0.656254   |
| sp P38159 RBMX_HUMAN    | -0.4679642 | 0.656254   |
| sp P62745 RHOB_HUMAN    | -0.4676495 | 0.656254   |
| sp Q7L2H7 EIF3M_HUMAN   | -0.4674988 | 0.656254   |
| sp Q96HD1 CREL1_HUMAN   | -0.4549599 | 0.7827403  |
| sp P62834 RAP1A_HUMAN   | -0.4510593 | 0.656254   |
| sp P69891 HBG1_HUMAN    | -0.4465962 | 0.656254   |

|                         |            |            |
|-------------------------|------------|------------|
| sp P10619-2 PPGB_HUMAN  | -0.4459305 | 1.1932944  |
| sp Q07075 AMPE_HUMAN    | -0.4347382 | 1.0485198  |
| sp Q13813-3 SPTN1_HUMAN | -0.4271793 | 1.1932944  |
| sp Q92522 H1X_HUMAN     | -0.4260712 | 0.7827403  |
| sp Q9NPJ3 ACO13_HUMAN   | -0.4256153 | 1.1932944  |
| sp Q13813-2 SPTN1_HUMAN | -0.4245844 | 1.1932944  |
| sp P12830 CADH1_HUMAN   | -0.4204903 | 1.1932944  |
| sp Q86TX2 ACOT1_HUMAN   | -0.4181728 | 0.656254   |
| sp Q9Y4G6 TLN2_HUMAN    | -0.4112597 | 0.656254   |
| sp P61006 RAB8A_HUMAN   | -0.4077721 | 1.1932944  |
| sp P78417-3 GSTO1_HUMAN | -0.4045334 | 1.1932944  |
| sp Q9Y376 CAB39_HUMAN   | -0.401516  | 1.2773042  |
| sp Q07812-7 BAX_HUMAN   | -0.3921318 | 1.1932944  |
| sp Q32MZ4-3 LRRF1_HUMAN | -0.3904533 | 1.1932944  |
| sp Q6NY19-2 KANK3_HUMAN | -0.3844643 | 1.1932944  |
| sp Q6IAA8 LTOR1_HUMAN   | -0.3835869 | 1.1932944  |
| sp P08631-2 HCK_HUMAN   | -0.3789673 | 0.656254   |
| sp P28676 GRAN_HUMAN    | -0.3788109 | 1.1932944  |
| sp P13761 2B17_HUMAN    | -0.3781185 | 0          |
| sp Q13976 KGP1_HUMAN    | -0.3720741 | 0          |
| sp P06753-2 TPM3_HUMAN  | -0.3594627 | 1.1932944  |
| sp Q12846 STX4_HUMAN    | -0.3551788 | 0.656254   |
| sp P29466-2 CASP1_HUMAN | -0.3542461 | 0.656254   |
| sp Q13283 G3BP1_HUMAN   | -0.3516502 | 0.6070219  |
| sp O15296 LX15B_HUMAN   | -0.3506241 | 0.69308156 |
| sp P15170-2 ERF3A_HUMAN | -0.3471737 | 1.1932944  |
| sp P06865 HEXA_HUMAN    | -0.3452396 | 1.2773042  |
| sp Q16822 PCKGM_HUMAN   | -0.3429833 | 1.1932944  |
| sp Q9BQE3 TBA1C_HUMAN   | -0.3429632 | 0.656254   |
| sp P61586 RHOA_HUMAN    | -0.3418312 | 1.1932944  |
| sp P51636-2 CAV2_HUMAN  | -0.3390656 | 1.1932944  |
| sp P63241 IF5A1_HUMAN   | -0.3367519 | 0.656254   |
| sp O75695 XRP2_HUMAN    | -0.3318119 | 1.1505735  |
| sp P09493-5 TPM1_HUMAN  | -0.3316631 | 1.1932944  |
| sp Q9ULZ3-2 ASC_HUMAN   | -0.3308754 | 1.1932944  |
| sp P52789 HXK2_HUMAN    | -0.3306599 | 0.656254   |
| sp Q96FN4 CPNE2_HUMAN   | -0.328063  | 0.656254   |
| sp Q9Y2Q5 LTOR2_HUMAN   | -0.3256674 | 0.7827403  |
| sp Q15056-2 IF4H_HUMAN  | -0.3248253 | 1.1932944  |
| sp P30049 ATPD_HUMAN    | -0.322937  | 1.1932944  |
| sp P06239-3 LCK_HUMAN   | -0.3208847 | 0.656254   |
| sp P10412 H14_HUMAN     | -0.3168945 | 0.19149946 |
| sp Q7Z7H5-3 TMED4_HUMAN | -0.3149433 | 1.1932944  |
| sp Q13404 UB2V1_HUMAN   | -0.3139248 | 1.2773042  |
| sp Q8N335 GPD1L_HUMAN   | -0.3130608 | 1.1505735  |



|                         |            |            |
|-------------------------|------------|------------|
| sp Q96EP5-2 DAZP1_HUMAN | -0.3117504 | 1.1932944  |
| sp P61956-2 SUMO2_HUMAN | -0.3098946 | 0.656254   |
| sp P30044-2 PRDX5_HUMAN | -0.3091354 | 0.656254   |
| sp P57088 TMM33_HUMAN   | -0.3031445 | 1.1932944  |
| sp Q6P4A8 PLBL1_HUMAN   | -0.299511  | 1.0485198  |
| sp P29992 GNA11_HUMAN   | -0.2987671 | 1.1932944  |
| sp P62314 SMD1_HUMAN    | -0.2978888 | 0.7827403  |
| sp Q8NC51-3 PAIRB_HUMAN | -0.2975025 | 1.1932944  |
| sp P62070-4 RRAS2_HUMAN | -0.2966995 | 0.656254   |
| sp Q15149-9 PLEC_HUMAN  | -0.2964306 | 0.656254   |
| sp Q30154 DRB5_HUMAN    | -0.2930164 | 0.656254   |
| sp Q6ZVM7-3 TM1L2_HUMAN | -0.290946  | 0.7827403  |
| sp Q9H2G2-2 SLK_HUMAN   | -0.2883568 | 0.7827403  |
| sp Q13177 PAK2_HUMAN    | -0.2882862 | 1.1932944  |
| sp Q9HB71 CYBP_HUMAN    | -0.2855434 | 1.1932944  |
| sp Q01518 CAP1_HUMAN    | -0.285039  | 0.656254   |
| sp P48059-3 LIMS1_HUMAN | -0.2836418 | 0.656254   |
| sp Q99436 PSB7_HUMAN    | -0.2812386 | 1.1932944  |
| sp P31946-2 1433B_HUMAN | -0.279213  | 0.656254   |
| sp Q92930 RAB8B_HUMAN   | -0.2779121 | 0.656254   |
| sp Q9H299 SH3L3_HUMAN   | -0.2760468 | 1.1932944  |
| sp Q7LG56-6 RIR2B_HUMAN | -0.275178  | 1.1932944  |
| sp P42285 MTREX_HUMAN   | -0.2736645 | 0.45033538 |
| sp P20339-2 RAB5A_HUMAN | -0.2726879 | 0.656254   |
| sp P02794 FRIH_HUMAN    | -0.2708988 | 0.84879977 |
| sp P42167 LAP2B_HUMAN   | -0.2702198 | 1.1932944  |
| sp P60033 CD81_HUMAN    | -0.2699928 | 1.1932944  |
| sp P61225 RAP2B_HUMAN   | -0.2691708 | 1.1932944  |
| sp P26368-2 U2AF2_HUMAN | -0.2689734 | 1.1932944  |
| sp Q03113 GNA12_HUMAN   | -0.2669525 | 0.656254   |
| sp P01112 RASH_HUMAN    | -0.2651081 | 0.656254   |
| sp P63096 GNAI1_HUMAN   | -0.2648754 | 1.1505735  |
| sp P62942 FKB1A_HUMAN   | -0.2647018 | 0.656254   |
| sp P61457 PHS_HUMAN     | -0.2581797 | 1.1932944  |
| sp Q8NHP8 PLBL2_HUMAN   | -0.2579041 | 0.45033538 |
| sp O14786 NRP1_HUMAN    | -0.2572918 | 1.1932944  |
| sp Q99961-3 SH3G1_HUMAN | -0.2567253 | 0.656254   |
| sp P35579-2 MYH9_HUMAN  | -0.2551422 | 0.656254   |
| sp Q9UFN0 NPS3A_HUMAN   | -0.2535267 | 0.7061832  |
| sp Q14254 FLOT2_HUMAN   | -0.2502251 | 1.214352   |
| sp P11234-2 RALB_HUMAN  | -0.2501926 | 0.656254   |
| sp P35754 GLRX1_HUMAN   | -0.2496758 | 1.1791906  |
| sp Q9UL18 AGO1_HUMAN    | -0.2490635 | 1.0301651  |
| sp Q9NUB1-2 ACS2L_HUMAN | -0.2487145 | 0.45033538 |
| sp P52788-2 SPSY_HUMAN  | -0.2482758 | 0.7827403  |

|                         |            |            |
|-------------------------|------------|------------|
| sp Q9NUJ1-3 ABHDA_HUMAN | -0.247879  | 0.7827403  |
| sp P45954-2 ACDSB_HUMAN | -0.247572  | 0.45033538 |
| sp P63220 RS21_HUMAN    | -0.2471924 | 1.1932944  |
| sp P12236 ADT3_HUMAN    | -0.2471237 | 1.1932944  |
| sp Q9NZ32 ARP10_HUMAN   | -0.2464581 | 1.1932944  |
| sp Q15121 PEA15_HUMAN   | -0.2463894 | 0.5204253  |
| sp P04839 CY24B_HUMAN   | -0.2462091 | 1.1932944  |
| sp O60814 H2B1K_HUMAN   | -0.2459583 | 0.2178309  |
| sp P25685-2 DNJB1_HUMAN | -0.2451    | 0.45033538 |
| sp O15400-2 STX7_HUMAN  | -0.2450676 | 0.20467198 |
| sp O00186 STXB3_HUMAN   | -0.2432032 | 0.45033538 |
| sp Q15181 IPYR_HUMAN    | -0.24263   | 0.45563722 |
| sp A5A3E0 POTEF_HUMAN   | -0.2423496 | 0          |
| sp P15529-10 MCP_HUMAN  | -0.2395859 | 0.656254   |
| sp Q9BWD1 THIC_HUMAN    | -0.2393532 | 0.7827403  |
| sp Q04695 K1C17_HUMAN   | -0.23839   | 0.656254   |
| sp Q04837 SSBP_HUMAN    | -0.2370281 | 1.1932944  |
| sp Q53T59 H1BP3_HUMAN   | -0.2353993 | 0.45033538 |
| sp O95716 RAB3D_HUMAN   | -0.2349243 | 0.656254   |
| sp P49756 RBM25_HUMAN   | -0.2318668 | 1.1505735  |
| sp P12694 ODBA_HUMAN    | -0.2310982 | 0.35795313 |
| sp P02511 CRYAB_HUMAN   | -0.2300072 | 1.0301651  |
| sp Q05315 LEG10_HUMAN   | -0.2274513 | 0          |
| sp Q14011-2 CIRBP_HUMAN | -0.2270289 | 0.91601294 |
| sp P61160 ARP2_HUMAN    | -0.2253075 | 1.1932944  |
| sp Q9UH99-3 SUN2_HUMAN  | -0.2233753 | 0.40256184 |
| sp P15311 EZRI_HUMAN    | -0.2230864 | 0.1806812  |
| sp Q15404 RSU1_HUMAN    | -0.2161007 | 0.656254   |
| sp Q9NX63 MIC19_HUMAN   | -0.2152042 | 1.1932944  |
| sp P28072 PSB6_HUMAN    | -0.2130413 | 1.1505735  |
| sp P10599-2 THIO_HUMAN  | -0.2129173 | 0.6298893  |
| sp P46783 RS10_HUMAN    | -0.2125902 | 0.45033538 |
| sp P31946 1433B_HUMAN   | -0.2124577 | 0.656254   |
| sp O75347 TBCA_HUMAN    | -0.2123451 | 0.5204253  |
| sp Q5JRX3-3 PREP_HUMAN  | -0.2104549 | 1.1932944  |
| sp P50552 VASP_HUMAN    | -0.2102919 | 1.0370445  |
| sp P12235 ADT1_HUMAN    | -0.2080097 | 0.656254   |
| sp Q16762 THTR_HUMAN    | -0.2074986 | 0.40256184 |
| sp P00740 FA9_HUMAN     | -0.2072277 | 0.312067   |
| sp P63167 DYL1_HUMAN    | -0.2069092 | 0.656254   |
| sp P01892 1A02_HUMAN    | -0.2059727 | 0.2178309  |
| sp P62826 RAN_HUMAN     | -0.2036114 | 1.214352   |
| sp Q8N684-3 CPSF7_HUMAN | -0.2028027 | 0.6070219  |
| sp P63261 ACTG_HUMAN    | -0.2024479 | 0          |
| sp P28482 MK01_HUMAN    | -0.2024307 | 1.3006523  |

|                         |            |            |
|-------------------------|------------|------------|
| sp Q02978-2 M2OM_HUMAN  | -0.2014694 | 1.1505735  |
| sp P61026 RAB10_HUMAN   | -0.200552  | 0.7827403  |
| sp P61224 RAP1B_HUMAN   | -0.1998682 | 0          |
| sp Q5JPE7-2 NOMO2_HUMAN | -0.1992645 | 1.1505735  |
| sp Q06136 KDSR_HUMAN    | -0.1982708 | 1.1932944  |
| sp Q15819 UB2V2_HUMAN   | -0.198204  | 0.656254   |
| sp Q9Y394-2 DHRS7_HUMAN | -0.1981049 | 0.5111962  |
| sp O60784-3 TOM1_HUMAN  | -0.1937523 | 0.656254   |
| sp P51553-2 IDH3G_HUMAN | -0.1933632 | 1.1932944  |
| sp Q9Y696 CLIC4_HUMAN   | -0.1920815 | 0.90036625 |
| sp O00231-2 PSD11_HUMAN | -0.1916943 | 1.0485198  |
| sp Q92905 CSN5_HUMAN    | -0.1913796 | 0.19149946 |
| sp Q04323-2 UBXN1_HUMAN | -0.1912251 | 1.1932944  |
| sp P30046 DOPD_HUMAN    | -0.1903477 | 1.1932944  |
| sp P07948-2 LYN_HUMAN   | -0.1902199 | 0.7827403  |
| sp P60981 DEST_HUMAN    | -0.1898918 | 0.7498006  |
| sp P23786 CPT2_HUMAN    | -0.1895332 | 0.8983557  |
| sp Q03154-4 ACY1_HUMAN  | -0.1890774 | 0.91601294 |
| sp Q9BXS5-2 AP1M1_HUMAN | -0.1877632 | 1.1276597  |
| sp P01911 2B1F_HUMAN    | -0.1877251 | 0.45033538 |
| sp Q9NQC3 RTN4_HUMAN    | -0.1867485 | 0.7588735  |
| sp Q8NBF2-2 NHLG2_HUMAN | -0.186039  | 0.7827403  |
| sp Q02218-2 ODO1_HUMAN  | -0.1848354 | 1.1791906  |
| sp P55010 IF5_HUMAN     | -0.1847973 | 1.1276597  |
| sp Q9NZB2-6 F120A_HUMAN | -0.1836395 | 0.6070219  |
| sp P16298-4 PP2BB_HUMAN | -0.1834526 | 0.6070219  |
| sp O43813 LANC1_HUMAN   | -0.1832848 | 1.1505735  |
| sp P06748-2 NPM_HUMAN   | -0.1826496 | 0.35795313 |
| sp Q8NHV1 GIMA7_HUMAN   | -0.1798935 | 0.7827403  |
| sp P52758 RIDA_HUMAN    | -0.1791325 | 0.19149946 |
| sp P31153 METK2_HUMAN   | -0.1781483 | 0.656254   |
| sp Q9HB40 RISC_HUMAN    | -0.1751652 | 1.0301651  |
| sp P08134 RHOC_HUMAN    | -0.1747513 | 0.19149946 |
| sp Q16630-2 CPSF6_HUMAN | -0.1740704 | 1.1505735  |
| sp P53004 BIEA_HUMAN    | -0.1740665 | 0.84879977 |
| sp Q9UBV8 PEF1_HUMAN    | -0.1739674 | 0.91601294 |
| sp Q15833-2 STXB2_HUMAN | -0.17313   | 0.19149946 |
| sp O94760 DDAH1_HUMAN   | -0.1719494 | 1.0485198  |
| sp Q86W92-2 LIPB1_HUMAN | -0.1718235 | 0.45033538 |
| sp Q14651 PLSI_HUMAN    | -0.1715412 | 0          |
| sp Q29963 1C06_HUMAN    | -0.1700954 | 0.656254   |
| sp P23142-4 FBLN1_HUMAN | -0.1674681 | 0.656254   |
| sp Q09028-3 RBBP4_HUMAN | -0.1669903 | 0.656254   |
| sp P67809 YBOX1_HUMAN   | -0.1634827 | 0.19149946 |
| sp P12955 PEPD_HUMAN    | -0.1634293 | 1.1240381  |

|                         |            |            |
|-------------------------|------------|------------|
| sp P58546 MTPN_HUMAN    | -0.1627369 | 0.91601294 |
| sp P51178-2 PLCD1_HUMAN | -0.1612358 | 0.2178309  |
| sp Q9UUK9 NUDT5_HUMAN   | -0.1611366 | 0.45033538 |
| sp P00403 COX2_HUMAN    | -0.1593933 | 0.5111962  |
| sp Q9NUQ9 FA49B_HUMAN   | -0.1592751 | 0.91601294 |
| sp Q9C0B1 FTO_HUMAN     | -0.158823  | 0.45033538 |
| sp Q9NRV9 HEBP1_HUMAN   | -0.1574154 | 0.40256184 |
| sp P62136 PP1A_HUMAN    | -0.1569748 | 1.1505735  |
| sp P61163 ACTZ_HUMAN    | -0.1568661 | 1.0485198  |
| sp Q9NZU5-2 LMCD1_HUMAN | -0.1568489 | 0.09851671 |
| sp P13693 TCTP_HUMAN    | -0.1565743 | 1.1932944  |
| sp P62879 GBB2_HUMAN    | -0.1560669 | 0.5111962  |
| sp P61758 PFD3_HUMAN    | -0.1555023 | 1.1932944  |
| sp P30533 AMRP_HUMAN    | -0.155468  | 0.4075265  |
| sp Q15637-2 SF01_HUMAN  | -0.1552792 | 1.1932944  |
| sp Q9Y305-4 ACOT9_HUMAN | -0.1548615 | 0          |
| sp P47985 UCRI_HUMAN    | -0.1544685 | 0.2178309  |
| sp P16930 FAAA_HUMAN    | -0.153244  | 0.656254   |
| sp P50452 SPB8_HUMAN    | -0.1529732 | 0.45033538 |
| sp P09525 ANXA4_HUMAN   | -0.1523819 | 0.565784   |
| sp Q9GZP4-2 PITH1_HUMAN | -0.151515  | 1.1932944  |
| sp P60891 PRPS1_HUMAN   | -0.1481819 | 0.656254   |
| sp P21964-2 COMT_HUMAN  | -0.1475315 | 0.43103603 |
| sp P48449-3 ERG7_HUMAN  | -0.1474056 | 1.0485198  |
| sp Q9UBW8 CSN7A_HUMAN   | -0.1473217 | 0.5204253  |
| sp Q9BTE1 DCTN5_HUMAN   | -0.145649  | 0.19149946 |
| sp Q9UNF0-2 PACN2_HUMAN | -0.1441193 | 0.95332193 |
| sp P07437 TBB5_HUMAN    | -0.1437683 | 0.5111962  |
| sp P18084 ITB5_HUMAN    | -0.1430092 | 0.7827403  |
| sp O75937 DNJC8_HUMAN   | -0.1421814 | 1.2095301  |
| sp P53597 SUCA_HUMAN    | -0.1418877 | 0.5204253  |
| sp P61204 ARF3_HUMAN    | -0.1414852 | 1.3006523  |
| sp P61088 UBE2N_HUMAN   | -0.1411648 | 0.45033538 |
| sp O15067 PUR4_HUMAN    | -0.1408625 | 0.7827403  |
| sp Q9NZK5 ADA2_HUMAN    | -0.1407204 | 0.45033538 |
| sp O00712-4 NFIB_HUMAN  | -0.1395435 | 0.656254   |
| sp O15498-2 YKT6_HUMAN  | -0.1387692 | 0.7827403  |
| sp Q99426 TBCB_HUMAN    | -0.1382484 | 0.43633315 |
| sp Q9Y3A3-3 PHOCN_HUMAN | -0.1375942 | 0.7827403  |
| sp P42126-2 ECI1_HUMAN  | -0.1367989 | 1.1932944  |
| sp O75131 CPNE3_HUMAN   | -0.1356545 | 0.5065026  |
| sp P12081-4 SYHC_HUMAN  | -0.1355972 | 0.43633315 |
| sp P62263 RS14_HUMAN    | -0.1349258 | 0.35795313 |
| sp Q10713 MPPA_HUMAN    | -0.1346893 | 0.70235044 |
| sp P14923 PLAK_HUMAN    | -0.1339569 | 0.7588735  |

|                          |            |            |
|--------------------------|------------|------------|
| sp O00391 QSOX1_HUMAN    | -0.1329842 | 1.1932944  |
| sp P09429 HMGB1_HUMAN    | -0.131155  | 0          |
| sp P02743 SAMP_HUMAN     | -0.1305866 | 0.21680334 |
| sp P36551 HEM6_HUMAN     | -0.1294289 | 0          |
| sp Q9UBQ7 GRHPR_HUMAN    | -0.1294022 | 0.30372584 |
| sp P34896-2 GLYC_HUMAN   | -0.1279163 | 0          |
| sp Q14515-2 SPRL1_HUMAN  | -0.1277466 | 0          |
| sp P0C0S5 H2AZ_HUMAN     | -0.1270752 | 0.656254   |
| sp P19367-2 HXK1_HUMAN   | -0.1270504 | 0.8941546  |
| sp P16104 H2AX_HUMAN     | -0.126173  | 0          |
| sp P51991 ROA3_HUMAN     | -0.1251984 | 0.25789237 |
| sp P63000-2 RAC1_HUMAN   | -0.1245899 | 0.09894868 |
| sp P84085 ARF5_HUMAN     | -0.1245689 | 0.656254   |
| sp P15153 RAC2_HUMAN     | -0.1237011 | 0.656254   |
| sp P23588 IF4B_HUMAN     | -0.1228333 | 0.5692702  |
| sp P30566 PUR8_HUMAN     | -0.1227951 | 0.656254   |
| sp Q16787-3 LAMA3_HUMAN  | -0.122551  | 0.656254   |
| sp P04083 ANXA1_HUMAN    | -0.122488  | 0.19318101 |
| sp Q96S97 MYADM_HUMAN    | -0.1224232 | 0.45033538 |
| sp P62495-2 ERF1_HUMAN   | -0.1218433 | 0.35795313 |
| sp O75915 PRAF3_HUMAN    | -0.1216221 | 0.7061832  |
| sp O75503 CLN5_HUMAN     | -0.1213989 | 0.91601294 |
| sp P60709 ACTB_HUMAN     | -0.1209984 | 0          |
| sp P28070 PSB4_HUMAN     | -0.1203194 | 0.48757824 |
| sp P11217 PYGM_HUMAN     | -0.1198521 | 0.656254   |
| sp Q9Y371-2 SHLB1_HUMAN  | -0.1185017 | 0          |
| sp Q6DKJ4 NXN_HUMAN      | -0.1180649 | 0.19149946 |
| sp O00232 PSD12_HUMAN    | -0.1178989 | 0.40256184 |
| sp E9PAV3 NACAM_HUMAN    | -0.1166382 | 0.7827403  |
| sp Q9UBC2-2 EP15R_HUMAN  | -0.1155148 | 0.45033538 |
| sp P09417-2 DHPR_HUMAN   | -0.1146145 | 0.19149946 |
| sp Q9C0C2 TB182_HUMAN    | -0.1143608 | 1.0634323  |
| sp Q9H4G4 GAPR1_HUMAN    | -0.1138916 | 0.5204253  |
| sp Q9Y277-2 VDAC3_HUMAN  | -0.1135922 | 1.0992733  |
| sp O95466-2 FMNL1_HUMAN  | -0.1134176 | 1.1932944  |
| sp P01833 PIGR_HUMAN     | -0.1132603 | 0.13973783 |
| sp Q15366-2 PCBP2_HUMAN  | -0.1125736 | 0.7061832  |
| sp Q9NZL9 MAT2B_HUMAN    | -0.1122246 | 0.5111962  |
| sp O14974-3 MYPT1_HUMAN  | -0.1115379 | 0.90036625 |
| sp O60716-14 CTND1_HUMAN | -0.1115189 | 0.09894868 |
| sp P08758 ANXA5_HUMAN    | -0.1102486 | 0.5741409  |
| sp Q7Z4W1 DCXR_HUMAN     | -0.1093521 | 0.8983557  |
| sp Q969V3-2 NCLN_HUMAN   | -0.1088257 | 0.5204253  |
| sp P51692 STA5B_HUMAN    | -0.1087952 | 0.7827403  |
| sp O43615 TIM44_HUMAN    | -0.1083775 | 0.45033538 |

|                         |            |            |
|-------------------------|------------|------------|
| sp P48047 ATPO_HUMAN    | -0.1082649 | 0.37060758 |
| sp P54578-3 UBP14_HUMAN | -0.1075096 | 0.17319627 |
| sp Q8TD55 PKHO2_HUMAN   | -0.1068344 | 0          |
| sp P21953 ODBB_HUMAN    | -0.1057358 | 0.35795313 |
| sp P30711 GSTT1_HUMAN   | -0.1051559 | 0.2178309  |
| sp Q13642-1 FHL1_HUMAN  | -0.1048355 | 0.656254   |
| sp Q15717-2 ELAV1_HUMAN | -0.104578  | 0.5204253  |
| sp Q9UQ80 PA2G4_HUMAN   | -0.1040726 | 0          |
| sp Q9HC35-2 EMAL4_HUMAN | -0.1022949 | 0.84879977 |
| sp P63267 ACTH_HUMAN    | -0.101696  | 0.656254   |
| sp Q9UJS0-2 CMC2_HUMAN  | -0.1015892 | 1.1932944  |
| sp P17612 KAPCA_HUMAN   | -0.1001759 | 0.6298893  |
| sp P50453 SPB9_HUMAN    | -0.0992966 | 0.8059303  |
| sp P08621-3 RU17_HUMAN  | -0.0990315 | 1.3006523  |
| sp P24557-2 THAS_HUMAN  | -0.0986977 | 0.7827403  |
| sp P31937 3HIDH_HUMAN   | -0.0984936 | 0.5204253  |
| sp Q6UVK1 CSPG4_HUMAN   | -0.0983162 | 0.04454162 |
| sp O75436 VP26A_HUMAN   | -0.098217  | 0.65625405 |
| sp O75608-2 LYPA1_HUMAN | -0.0978413 | 0.7827403  |
| sp Q16527 CSRP2_HUMAN   | -0.0977268 | 0.7061832  |
| sp O00483 NDUA4_HUMAN   | -0.0976105 | 0.45033538 |
| sp P52790 HXK3_HUMAN    | -0.0974636 | 0.33495146 |
| sp P84090 ERH_HUMAN     | -0.0969086 | 1.2095301  |
| sp Q9Y5S9-2 RBM8A_HUMAN | -0.0965166 | 0.09894868 |
| sp P16070-7 CD44_HUMAN  | -0.0963268 | 0.35795313 |
| sp Q08945 SSRP1_HUMAN   | -0.0960979 | 0.90036625 |
| sp P55263 ADK_HUMAN     | -0.0948887 | 0.6298893  |
| sp Q9Y5K5-2 UCHL5_HUMAN | -0.0948772 | 0.43633315 |
| sp Q6DD88 ATLA3_HUMAN   | -0.0936184 | 0.87291557 |
| sp Q96C23 GALM_HUMAN    | -0.0934925 | 0          |
| sp P30084 ECHM_HUMAN    | -0.0926285 | 0.84879977 |
| sp P30520 PURA2_HUMAN   | -0.0925522 | 0.5832693  |
| sp P30838 AL3A1_HUMAN   | -0.0923157 | 0          |
| sp P30466 1B18_HUMAN    | -0.0919228 | 0          |
| sp P61081 UBC12_HUMAN   | -0.0907497 | 0.84879977 |
| sp P13861 KAP2_HUMAN    | -0.0906696 | 1.1034192  |
| sp Q969H8 MYDGF_HUMAN   | -0.0903549 | 0.7061832  |
| sp P30086 PEBP1_HUMAN   | -0.0900326 | 0.90036625 |
| sp O75083 WDR1_HUMAN    | -0.0900173 | 0.8200627  |
| sp Q9NQR4 NIT2_HUMAN    | -0.0896988 | 0.84879977 |
| sp P46940 IQGA1_HUMAN   | -0.0893326 | 0.73115146 |
| sp P05452 TETN_HUMAN    | -0.089138  | 0.7061832  |
| sp P11177-3 ODPB_HUMAN  | -0.0882645 | 0.34137914 |
| sp P16278-2 BGAL_HUMAN  | -0.0880718 | 1.0634323  |
| sp P48637 GSHB_HUMAN    | -0.0880184 | 1.071201   |

|                         |            |            |
|-------------------------|------------|------------|
| sp Q02878 RL6_HUMAN     | -0.0880051 | 0.5204253  |
| sp P07203 GPX1_HUMAN    | -0.0878944 | 0.0846519  |
| sp Q13045-2 FLII_HUMAN  | -0.0872936 | 0.44572112 |
| sp P31930 QCR1_HUMAN    | -0.0868149 | 0.8826702  |
| sp Q92769 HDAC2_HUMAN   | -0.0866928 | 0.656254   |
| sp P25398 RS12_HUMAN    | -0.0861301 | 0.84879977 |
| sp P30512 1A29_HUMAN    | -0.0849991 | 0.5204253  |
| sp O75112-7 LDB3_HUMAN  | -0.0845871 | 0.91601294 |
| sp P16152 CBR1_HUMAN    | -0.0843391 | 0.41804093 |
| sp P09496-2 CLCA_HUMAN  | -0.0834827 | 0.8983557  |
| sp O15260-2 SURF4_HUMAN | -0.0827379 | 0.19149946 |
| sp P23634-8 AT2B4_HUMAN | -0.0826836 | 0.68888646 |
| sp P63010-2 AP2B1_HUMAN | -0.0826607 | 0.45720983 |
| sp Q9HAV0 GGB4_HUMAN    | -0.082653  | 0          |
| sp P04632 CPNS1_HUMAN   | -0.0823536 | 1.0241117  |
| sp Q5K4L6 S27A3_HUMAN   | -0.0819635 | 0.35795313 |
| sp Q08257 QOR_HUMAN     | -0.0813828 | 0.94599336 |
| sp P26599-2 PTBP1_HUMAN | -0.080843  | 0.51870745 |
| sp O95197-2 RTN3_HUMAN  | -0.0808334 | 0          |
| sp O00264 PGRC1_HUMAN   | -0.0807533 | 0.70235044 |
| sp P46926 GNPI1_HUMAN   | -0.0801086 | 0.30372584 |
| sp P00736 C1R_HUMAN     | -0.079567  | 0.35795313 |
| sp P36871 PGM1_HUMAN    | -0.079319  | 0          |
| sp Q86VS8 HOOK3_HUMAN   | -0.0780697 | 0.19149946 |
| sp P61970 NTF2_HUMAN    | -0.0778408 | 0.91601294 |
| sp Q92556 ELMO1_HUMAN   | -0.0773964 | 0.1342476  |
| sp P42330 AK1C3_HUMAN   | -0.0773296 | 1.0992733  |
| sp Q13884 SNTB1_HUMAN   | -0.0772743 | 0          |
| sp P42566 EPS15_HUMAN   | -0.0763321 | 0.19149946 |
| sp Q9Y2B0 CNPY2_HUMAN   | -0.0761004 | 0.35795313 |
| sp Q9UI12-2 VATH_HUMAN  | -0.0751247 | 0.20467198 |
| sp Q14108 SCR2_HUMAN    | -0.0741806 | 0.7827403  |
| sp Q13492-2 PICAL_HUMAN | -0.0739212 | 0.09894868 |
| sp P60842 IF4A1_HUMAN   | -0.0729561 | 1.2954973  |
| sp Q96HC4 PDLI5_HUMAN   | -0.0724926 | 0          |
| sp Q9Y639-4 NPTN_HUMAN  | -0.0724716 | 0.19149946 |
| sp Q13526 PIN1_HUMAN    | -0.0723667 | 0.45033538 |
| sp P01861 IGHG4_HUMAN   | -0.0722504 | 0.01311907 |
| sp Q96HN2-2 SAHH3_HUMAN | -0.0717754 | 0          |
| sp P49961-6 ENTP1_HUMAN | -0.0711002 | 0.5204253  |
| sp Q9BZZ5-5 API5_HUMAN  | -0.0709276 | 0.4075265  |
| sp O75368 SH3L1_HUMAN   | -0.0705757 | 0.35795313 |
| sp P50570-2 DYN2_HUMAN  | -0.070549  | 1.0370445  |
| sp P29400-2 CO4A5_HUMAN | -0.0697517 | 0          |
| sp Q13418 ILK_HUMAN     | -0.0696125 | 0.16649151 |

|                         |            |            |
|-------------------------|------------|------------|
| sp P33176 KINH_HUMAN    | -0.0687332 | 0.44444597 |
| sp O75947-2 ATP5H_HUMAN | -0.0673466 | 0.51870745 |
| sp Q16629-2 SRSF7_HUMAN | -0.0671806 | 0.21439649 |
| sp Q9NUV9 GIMA4_HUMAN   | -0.0670357 | 0.316588   |
| sp Q02952-2 AKA12_HUMAN | -0.0669861 | 0          |
| sp Q96P70 IPO9_HUMAN    | -0.0666142 | 0.5111962  |
| sp P12004 PCNA_HUMAN    | -0.0662708 | 1.1932944  |
| sp Q9Y6A4 CFA20_HUMAN   | -0.0661659 | 0.19149946 |
| sp Q01130-2 SRSF2_HUMAN | -0.0655937 | 0.09894868 |
| sp P36873-2 PP1G_HUMAN  | -0.0655727 | 0.45033538 |
| sp Q9UHX1-6 PUF60_HUMAN | -0.0639801 | 0.5204253  |
| sp Q15691 MARE1_HUMAN   | -0.0636597 | 0.20467198 |
| sp Q16775-2 GLO2_HUMAN  | -0.0634441 | 0.09894868 |
| sp Q10567-2 AP1B1_HUMAN | -0.063427  | 0.91601294 |
| sp Q96BW5-2 PTER_HUMAN  | -0.0623436 | 0          |
| sp Q9NSE4 SYIM_HUMAN    | -0.0622978 | 0.3005443  |
| sp O60749 SNX2_HUMAN    | -0.0622406 | 0.35520625 |
| sp Q16181-2 SEPT7_HUMAN | -0.0620117 | 0.91458976 |
| sp P01743 HV146_HUMAN   | -0.0619583 | 0          |
| sp P63104 1433Z_HUMAN   | -0.0617886 | 0.24295025 |
| sp P49354-2 FNNTA_HUMAN | -0.0616751 | 1.0485198  |
| sp Q15075 EEA1_HUMAN    | -0.0613651 | 0.34969378 |
| sp P78417-2 GSTO1_HUMAN | -0.0610695 | 0.656254   |
| sp P06132 DCUP_HUMAN    | -0.0610199 | 0.09750395 |
| sp P26196 DDX6_HUMAN    | -0.0609245 | 0.2178309  |
| sp Q86U42-2 PABP2_HUMAN | -0.0608692 | 0          |
| sp P08294 SODE_HUMAN    | -0.0595818 | 0.45720983 |
| sp Q96HE7 ERO1A_HUMAN   | -0.0594406 | 0.09894868 |
| sp Q14165 MLEC_HUMAN    | -0.0583363 | 0.5204253  |
| sp P31942-2 HNRH3_HUMAN | -0.0579376 | 1.3006523  |
| sp Q06323 PSME1_HUMAN   | -0.0578041 | 0.79861414 |
| sp O75396 SC22B_HUMAN   | -0.0577717 | 0.39873424 |
| sp Q9HCB6 SPON1_HUMAN   | -0.0575771 | 0          |
| sp P00918 CAH2_HUMAN    | -0.0569019 | 1.1932943  |
| sp P49903-2 SPS1_HUMAN  | -0.0568085 | 0.2178309  |
| sp O00571-2 DDX3X_HUMAN | -0.0565624 | 0.2178309  |
| sp P48444 COPD_HUMAN    | -0.0565147 | 1.0984834  |
| sp Q9UL46 PSME2_HUMAN   | -0.0552387 | 0.79861414 |
| sp Q9P2R7-2 SUCB1_HUMAN | -0.0543137 | 0.19410844 |
| sp Q99733-2 NP1L4_HUMAN | -0.0537062 | 0.04454162 |
| sp Q8NCW5 NNRE_HUMAN    | -0.0536461 | 0.40256184 |
| sp P26885 FKBP2_HUMAN   | -0.0536308 | 0.19149946 |
| sp P36542 ATPG_HUMAN    | -0.0524874 | 0          |
| sp P54727 RD23B_HUMAN   | -0.0523491 | 0.35795313 |
| sp P04424-2 ARLY_HUMAN  | -0.0512848 | 0.0846519  |



|                         |            |            |
|-------------------------|------------|------------|
| sp O75874 IDHC_HUMAN    | -0.051281  | 0.34244674 |
| sp Q9Y281 COF2_HUMAN    | -0.0512218 | 0          |
| sp Q13838-2 DX39B_HUMAN | -0.051178  | 0.21439649 |
| sp O43747-2 AP1G1_HUMAN | -0.050724  | 0.35193655 |
| sp O94905 ERLN2_HUMAN   | -0.0501022 | 0.312067   |
| sp P33316 DUT_HUMAN     | -0.0499935 | 0          |
| sp Q9BR76 COR1B_HUMAN   | -0.0495338 | 0          |
| sp P35998 PRS7_HUMAN    | -0.0494537 | 0.5004855  |
| sp O00299 CLIC1_HUMAN   | -0.0493507 | 0.07367946 |
| sp P35268 RL22_HUMAN    | -0.0490608 | 0.09894868 |
| sp P53602 MVD1_HUMAN    | -0.0489502 | 0.28516325 |
| sp O60313-10 OPA1_HUMAN | -0.0481873 | 0.19149946 |
| sp Q9NZM1-6 MYOF_HUMAN  | -0.0481586 | 0.04711977 |
| sp Q9NYF8-2 BCLF1_HUMAN | -0.0480137 | 0.312067   |
| sp P62304 RUXE_HUMAN    | -0.0479012 | 0          |
| sp P60174 TPIS_HUMAN    | -0.047596  | 0.95974463 |
| sp P17655 CAN2_HUMAN    | -0.0466652 | 1.1164713  |
| sp Q9BTE3-2 MCMBP_HUMAN | -0.046483  | 0.19149946 |
| sp P35908 K22E_HUMAN    | -0.0455971 | 0.13882811 |
| sp P51991-2 ROA3_HUMAN  | -0.045332  | 0          |
| sp P23284 PIIB_HUMAN    | -0.0447521 | 1.2438905  |
| sp Q9UMS4 PRP19_HUMAN   | -0.044323  | 0.29066643 |
| sp Q14203-3 DCTN1_HUMAN | -0.044117  | 0.45720983 |
| sp Q9Y3A5 SBDS_HUMAN    | -0.0435791 | 0.48520416 |
| sp Q13126-2 MTAP_HUMAN  | -0.0426674 | 0.34323573 |
| sp P08754 GNAI3_HUMAN   | -0.04245   | 0          |
| sp Q14894 CRYM_HUMAN    | -0.0418873 | 0.19149946 |
| sp Q13867 BLMH_HUMAN    | -0.0407505 | 0.19149946 |
| sp P30613-2 KPYR_HUMAN  | -0.0406609 | 0.656254   |
| sp P10155 RO60_HUMAN    | -0.0406332 | 0.16077396 |
| sp P34897-2 GLYM_HUMAN  | -0.039608  | 0.48757824 |
| sp Q13423 NNTM_HUMAN    | -0.0394478 | 0.52598757 |
| sp P60866-2 RS20_HUMAN  | -0.0386524 | 0.19149946 |
| sp O00429-6 DNM1L_HUMAN | -0.0386162 | 0.1500082  |
| sp O43390-2 HNRPR_HUMAN | -0.0384121 | 0.5717351  |
| sp P11387 TOP1_HUMAN    | -0.0382118 | 0.19149946 |
| sp Q92629-3 SGCD_HUMAN  | -0.0381241 | 0.21439649 |
| sp P49591 SYSC_HUMAN    | -0.038044  | 0.312067   |
| sp P18669 PGAM1_HUMAN   | -0.0370216 | 0.8654178  |
| sp Q99598 TSNAX_HUMAN   | -0.0365372 | 0          |
| sp P28065-2 PSB9_HUMAN  | -0.0359993 | 0.04454162 |
| sp P62906 RL10A_HUMAN   | -0.0359325 | 0          |
| sp Q9UN86-2 G3BP2_HUMAN | -0.0355797 | 0          |
| sp Q07955-3 SRSF1_HUMAN | -0.0351944 | 0.05681695 |
| sp Q16643-3 DREB_HUMAN  | -0.0345497 | 0.17319627 |

|                          |            |            |
|--------------------------|------------|------------|
| sp Q15019-2 SEPT2_HUMAN  | -0.034153  | 0.3653036  |
| sp Q9NZ01 TECR_HUMAN     | -0.0333328 | 0.21439649 |
| sp Q13232 NDK3_HUMAN     | -0.0332603 | 0.1342476  |
| sp Q12931-2 TRAP1_HUMAN  | -0.0332375 | 0.5204253  |
| sp O94979-10 SC31A_HUMAN | -0.033226  | 0.1558116  |
| sp P68104 EF1A1_HUMAN    | -0.0326462 | 0.18414244 |
| sp P07195 LDHB_HUMAN     | -0.0325298 | 0.1159057  |
| sp P62857 RS28_HUMAN     | -0.0323677 | 0.2178309  |
| sp O15372 EIF3H_HUMAN    | -0.0323467 | 0.2178309  |
| sp P11678 PERE_HUMAN     | -0.0322361 | 0          |
| sp Q15233 NONO_HUMAN     | -0.0308323 | 0.10138063 |
| sp Q96QK1 VPS35_HUMAN    | -0.0307388 | 0.29781067 |
| sp Q92973-2 TNPO1_HUMAN  | -0.0300884 | 0.21439649 |
| sp P22033 MUTA_HUMAN     | -0.0297623 | 0          |
| sp Q99829 CPNE1_HUMAN    | -0.029417  | 0.29066643 |
| sp P55786 PSA_HUMAN      | -0.0291805 | 0.3985966  |
| sp P29590 PML_HUMAN      | -0.0290871 | 0.09064758 |
| sp P20073-2 ANXA7_HUMAN  | -0.0290318 | 0.2591514  |
| sp P62269 RS18_HUMAN     | -0.0283661 | 0.1342476  |
| sp Q92688-2 AN32B_HUMAN  | -0.0278702 | 0          |
| sp P00390-2 GSHR_HUMAN   | -0.0277252 | 0.11949348 |
| sp O94811 TPPP_HUMAN     | -0.0276546 | 0          |
| sp O00233-2 PSMD9_HUMAN  | -0.0276241 | 0.19149946 |
| sp Q9UJU6-2 DBNL_HUMAN   | -0.0274467 | 0.1342476  |
| sp Q9BT78 CSN4_HUMAN     | -0.026226  | 0.06291623 |
| sp P11766 ADHX_HUMAN     | -0.0260468 | 0.44444597 |
| sp Q9BUJ2-4 HNRL1_HUMAN  | -0.0258369 | 0.7118947  |
| sp O75923-11 DYSF_HUMAN  | -0.0255775 | 0          |
| sp P29350-3 PTN6_HUMAN   | -0.0248261 | 0.04454162 |
| sp Q7L5N1 CSN6_HUMAN     | -0.0238209 | 0          |
| sp P43686 PRS6B_HUMAN    | -0.0234642 | 0.6615227  |
| sp P41250 GARS_HUMAN     | -0.0230951 | 0.12054814 |
| sp P53041 PPP5_HUMAN     | -0.0224152 | 0.2178309  |
| sp Q15437 SC23B_HUMAN    | -0.022274  | 0          |
| sp Q16891-2 MIC60_HUMAN  | -0.0221672 | 0.32654193 |
| sp Q9ULA0 DNPEP_HUMAN    | -0.0220451 | 0.4490988  |
| sp O00754-2 MA2B1_HUMAN  | -0.0218506 | 0.21439649 |
| sp Q0ZGT2-4 NEXN_HUMAN   | -0.0217609 | 0.09851671 |
| sp P01034 CYTC_HUMAN     | -0.0216331 | 0.45033538 |
| sp Q969X5-2 ERGI1_HUMAN  | -0.0210686 | 0.2178309  |
| sp Q8TCD5 NT5C_HUMAN     | -0.020997  | 0.19149946 |
| sp O60506-3 HNRPQ_HUMAN  | -0.0209656 | 0.1342476  |
| sp P00491 PNPH_HUMAN     | -0.0206528 | 0.386649   |
| sp Q12905 ILF2_HUMAN     | -0.0201359 | 0.02756438 |
| sp Q14498-2 RBM39_HUMAN  | -0.0186272 | 0.14672586 |

|                         |            |            |
|-------------------------|------------|------------|
| sp P23497 SP100_HUMAN   | -0.0181122 | 0.45033538 |
| sp P25705 ATPA_HUMAN    | -0.017992  | 0.25789237 |
| sp P22059 OSBP1_HUMAN   | -0.0178566 | 0          |
| sp Q13435 SF3B2_HUMAN   | -0.0171127 | 0          |
| sp P07741 APT_HUMAN     | -0.0166435 | 0.11612091 |
| sp P40227 TCPZ_HUMAN    | -0.0162869 | 0.09215608 |
| sp Q6NVY1 HIBCH_HUMAN   | -0.0160599 | 0.21439649 |
| sp Q8WUM4 PDC6I_HUMAN   | -0.0156002 | 0.01406953 |
| sp P54652 HSP72_HUMAN   | -0.0148907 | 0.09894868 |
| sp Q15393 SF3B3_HUMAN   | -0.0146275 | 0.19410844 |
| sp P10768 ESTD_HUMAN    | -0.0139503 | 0.09339783 |
| sp P11166 GTR1_HUMAN    | -0.0135994 | 0          |
| sp P49755 TMEDA_HUMAN   | -0.0133514 | 0.06291623 |
| sp P35611-2 ADDA_HUMAN  | -0.0132122 | 0.20467198 |
| sp P27694 RFA1_HUMAN    | -0.0127792 | 0.17511293 |
| sp P40429 RL13A_HUMAN   | -0.0124302 | 0.09894868 |
| sp Q92945 FUBP2_HUMAN   | -0.0121479 | 0.02174174 |
| sp Q92747 ARC1A_HUMAN   | -0.0121269 | 0          |
| sp Q9NY33 DPP3_HUMAN    | -0.0121155 | 0.05634482 |
| sp P27348 1433T_HUMAN   | -0.0120277 | 0.04817784 |
| sp P04066 FUCO_HUMAN    | -0.0117531 | 0.09894868 |
| sp Q9BVC6 TM109_HUMAN   | -0.0117512 | 0.09894868 |
| sp Q9NY15 STAB1_HUMAN   | -0.0117493 | 0.19149946 |
| sp O43242 PSMD3_HUMAN   | -0.0116959 | 0.05634482 |
| sp P48735-2 IDHP_HUMAN  | -0.0113678 | 0.79861414 |
| sp P30153 2AAA_HUMAN    | -0.0097198 | 0.15874931 |
| sp P17844-2 DDX5_HUMAN  | -0.0094337 | 0.02174174 |
| sp P27824-2 CALX_HUMAN  | -0.0086594 | 0.03712561 |
| sp P17980 PRS6A_HUMAN   | -0.0074635 | 0.1329664  |
| sp P02768 ALBU_HUMAN    | -0.0071392 | 0.09927666 |
| sp P27797 CALR_HUMAN    | -0.0069942 | 0.0426314  |
| sp P00492 HPRT_HUMAN    | -0.006424  | 0.21439649 |
| sp Q9UNH7-2 SNX6_HUMAN  | -0.0059757 | 0          |
| sp P61313 RL15_HUMAN    | -0.0059528 | 0.45033538 |
| sp Q16539-2 MK14_HUMAN  | -0.0058708 | 0          |
| sp Q96M27-3 PRRC1_HUMAN | -0.005785  | 0.45033538 |
| sp P61201-2 CSN2_HUMAN  | -0.0052242 | 0          |
| sp Q9UKV3-5 ACINU_HUMAN | -0.005043  | 0.21439649 |
| sp Q96KP4 CNDP2_HUMAN   | -0.0044498 | 0.12274049 |
| sp P09619 PGFRB_HUMAN   | -0.0043831 | 0.09894868 |
| sp Q02790 FKBP4_HUMAN   | -0.0043354 | 0.30372584 |
| sp Q9BXP5-2 SRRT_HUMAN  | -0.0042877 | 0.21439649 |
| sp P48643 TCPE_HUMAN    | -0.0040035 | 0.16178675 |
| sp Q9UNE7-2 CHIP_HUMAN  | -0.0039272 | 0          |
| sp P98082-2 DAB2_HUMAN  | -0.0038414 | 0          |

|                         |            |            |
|-------------------------|------------|------------|
| sp P23142 FBLN1_HUMAN   | -0.0031528 | 0          |
| sp P08133 ANXA6_HUMAN   | -0.0030918 | 0.14408782 |
| sp P04075 ALDOA_HUMAN   | -0.0030708 | 0.09088494 |
| sp Q14980-2 NUMA1_HUMAN | -0.0029163 | 0.10770471 |
| sp Q15631 TSN_HUMAN     | -0.0027332 | 0.06291623 |
| sp O75643 U520_HUMAN    | -0.002636  | 0          |
| sp Q13630 FCL_HUMAN     | -0.0024433 | 0          |
| sp Q9H9B4 SFXN1_HUMAN   | -0.0023117 | 0.19149946 |
| sp P30085 KCY_HUMAN     | -0.0021105 | 0.5204253  |
| sp P49458 SRP09_HUMAN   | -0.0015221 | 0          |
| sp P06756-3 ITAV_HUMAN  | -0.0014992 | 0.20467198 |
| sp Q9BRR6-2 ADPGK_HUMAN | -0.0011101 | 0          |
| sp Q9BTV4 TMM43_HUMAN   | -9.54E-04  | 0.04454162 |
| sp O75323 NIPS2_HUMAN   | -1.37E-04  | 0          |
| sp P37108 SRP14_HUMAN   | 6.31E-04   | 0          |
| sp P22234-2 PUR6_HUMAN  | 0.00112534 | 0.11949348 |
| sp P18085 ARF4_HUMAN    | 0.00129128 | 0          |
| sp Q08211 DHX9_HUMAN    | 0.0021019  | 0.24362843 |
| sp Q96RQ3 MCCA_HUMAN    | 0.00326729 | 0.30372584 |
| sp P55209-2 NP1L1_HUMAN | 0.00358582 | 0          |
| sp P02549-2 SPTA1_HUMAN | 0.0038414  | 0.1827406  |
| sp Q06828 FMOD_HUMAN    | 0.00400734 | 0.19149946 |
| sp Q9P2J5-2 SYLC_HUMAN  | 0.00457001 | 0          |
| sp Q9NSD9 SYFB_HUMAN    | 0.00504303 | 0.06291623 |
| sp Q8WVM8 SCFD1_HUMAN   | 0.00568199 | 0.04454162 |
| sp Q96CW1-2 AP2M1_HUMAN | 0.00719452 | 0.06291623 |
| sp P62888 RL30_HUMAN    | 0.00719833 | 0.2178309  |
| sp Q562R1 ACTBL_HUMAN   | 0.00748253 | 0          |
| sp P30101 PDIA3_HUMAN   | 0.00777054 | 0.00597242 |
| sp P53396-2 ACLY_HUMAN  | 0.0078392  | 0.03435687 |
| sp P50990 TCPQ_HUMAN    | 0.00803947 | 0.12618111 |
| sp Q15029-2 U5S1_HUMAN  | 0.00949287 | 0.04153777 |
| sp P11171-7 41_HUMAN    | 0.00995255 | 0.03043297 |
| sp P25325-2 THTM_HUMAN  | 0.01003456 | 0.06291623 |
| sp P29692-2 EF1D_HUMAN  | 0.01012421 | 0.2178309  |
| sp A0FGR8-2 ESYT2_HUMAN | 0.0104847  | 0          |
| sp P15121 ALDR_HUMAN    | 0.01081276 | 0.06695005 |
| sp P55084 ECHB_HUMAN    | 0.01090431 | 0.37128913 |
| sp P24666 PPAC_HUMAN    | 0.01184654 | 0          |
| sp P68366-2 TBA4A_HUMAN | 0.01196671 | 0          |
| sp Q8NBJ5 GT251_HUMAN   | 0.01199913 | 0.2178309  |
| sp Q86UX2-2 ITIH5_HUMAN | 0.01248646 | 0.19149946 |
| sp Q08380 LG3BP_HUMAN   | 0.01252937 | 0.316588   |
| sp Q15293 RCN1_HUMAN    | 0.01265526 | 0.20467198 |
| sp P30626-2 SORCN_HUMAN | 0.01325417 | 0.14927356 |

|                         |            |            |
|-------------------------|------------|------------|
| sp O95861-4 BPNT1_HUMAN | 0.0133934  | 0.1342476  |
| sp Q9Y6C2 EMIL1_HUMAN   | 0.01347351 | 0.08173559 |
| sp Q8WXF1 PSPC1_HUMAN   | 0.01347351 | 0.09339783 |
| sp P19971 TYPH_HUMAN    | 0.01401138 | 0.03228646 |
| sp P04222 1C03_HUMAN    | 0.01441574 | 0          |
| sp Q9BRF8-2 CPPED_HUMAN | 0.01468658 | 0.09894868 |
| sp P00441 SODC_HUMAN    | 0.01516342 | 0.14672586 |
| sp O60256-3 KPRB_HUMAN  | 0.01529121 | 0.45033538 |
| sp P13716-2 HEM2_HUMAN  | 0.01548958 | 0.34137914 |
| sp O60610-2 DIAP1_HUMAN | 0.01551437 | 0.30372584 |
| sp O15173-2 PGRC2_HUMAN | 0.01570129 | 0.09750395 |
| sp P14868 SYDC_HUMAN    | 0.01596832 | 0.02863072 |
| sp P36776-3 LONM_HUMAN  | 0.01679039 | 0.26737198 |
| sp Q5TDH0-3 DDI2_HUMAN  | 0.0168438  | 0.2178309  |
| sp P62633-3 CNBP_HUMAN  | 0.01806641 | 0          |
| sp Q1KMD3 HNRL2_HUMAN   | 0.01820183 | 0.10328458 |
| sp P22392-2 NDKB_HUMAN  | 0.01853943 | 0.7498006  |
| sp Q9GZT8 NIF3L_HUMAN   | 0.01866913 | 0.19149946 |
| sp P52272-2 HNRPM_HUMAN | 0.01896095 | 0.29692787 |
| sp P56537 IF6_HUMAN     | 0.01909828 | 0.26737198 |
| sp Q71UM5 RS27L_HUMAN   | 0.0193615  | 0          |
| sp Q9BUF5 TBB6_HUMAN    | 0.01964378 | 0          |
| BirA-TRIP6_BirAT6       | 0.01972485 | 0          |
| sp Q8NDH3 PEPL1_HUMAN   | 0.02028465 | 0.40256184 |
| sp Q8WXX5 DNJC9_HUMAN   | 0.02042389 | 0          |
| sp O76003 GLRX3_HUMAN   | 0.02052879 | 0          |
| sp Q14764 MVP_HUMAN     | 0.0207119  | 0.0099764  |
| sp P28062 PSB8_HUMAN    | 0.02075195 | 0.1342476  |
| sp P31943 HNRH1_HUMAN   | 0.02076531 | 0          |
| sp Q96JB5-4 CK5P3_HUMAN | 0.02108383 | 0.2178309  |
| sp Q9Y3B3 TMED7_HUMAN   | 0.02114487 | 0.19149946 |
| sp P21333-2 FLNA_HUMAN  | 0.02136612 | 0.07781328 |
| sp Q9UBQ5 EIF3K_HUMAN   | 0.02169991 | 0.19149946 |
| sp Q96CN7 ISOC1_HUMAN   | 0.02174377 | 0.20467198 |
| sp Q63ZY3-3 KANK2_HUMAN | 0.02177429 | 0.33495146 |
| sp Q13425 SNTB2_HUMAN   | 0.02206039 | 0          |
| sp P41091 IF2G_HUMAN    | 0.02211189 | 0.4075265  |
| sp Q6PCB0 VWA1_HUMAN    | 0.02249527 | 0.28516325 |
| sp P27918 PROP_HUMAN    | 0.0230217  | 0.45033538 |
| sp P20674 COX5A_HUMAN   | 0.02323532 | 0.2178309  |
| sp P11940-2 PABP1_HUMAN | 0.0233078  | 0.2178309  |
| sp P30519 HMOX2_HUMAN   | 0.02408981 | 0          |
| sp P62714 PP2AB_HUMAN   | 0.02511787 | 0          |
| sp P0DOX3 IGD_HUMAN     | 0.02513886 | 0.656254   |
| sp POCG39 POTEJ_HUMAN   | 0.0263691  | 0          |

|                         |            |            |
|-------------------------|------------|------------|
| sp Q8NBX0 SCPDL_HUMAN   | 0.02645111 | 0.09894868 |
| sp P28161 GSTM2_HUMAN   | 0.02708721 | 0.656254   |
| sp Q9P1F3 ABRAL_HUMAN   | 0.02797794 | 0          |
| sp P12270 TPR_HUMAN     | 0.02862358 | 0.20304409 |
| sp P17987 TCPA_HUMAN    | 0.0288353  | 0.7817134  |
| sp P07996 TSP1_HUMAN    | 0.02908707 | 0.09894868 |
| sp P07951-3 TPM2_HUMAN  | 0.02933502 | 0.40256184 |
| sp Q13217 DNJC3_HUMAN   | 0.02974892 | 0.6298893  |
| sp O14936-2 CSKP_HUMAN  | 0.03014755 | 0.33495146 |
| sp O95336 6PGL_HUMAN    | 0.03043556 | 0.4075265  |
| sp Q96AG4 LRC59_HUMAN   | 0.03138733 | 0.20467198 |
| sp Q709C8-3 VP13C_HUMAN | 0.03237152 | 0.316588   |
| sp P00338 LDHA_HUMAN    | 0.0336647  | 0.01542275 |
| sp P39687 AN32A_HUMAN   | 0.03402519 | 0.35795313 |
| sp Q8N163-2 CCAR2_HUMAN | 0.03408623 | 0.5204253  |
| sp P78371 TCPB_HUMAN    | 0.03455067 | 0.53140414 |
| sp P40763-3 STAT3_HUMAN | 0.03530693 | 0.30372584 |
| sp O43684-2 BUB3_HUMAN  | 0.03552628 | 0.19149946 |
| sp Q99497 PARK7_HUMAN   | 0.03566742 | 0.26737198 |
| sp Q9BUT1 BDH2_HUMAN    | 0.03575134 | 0.04454162 |
| sp P05388 RLA0_HUMAN    | 0.03588486 | 0.61034113 |
| sp Q16531 DDB1_HUMAN    | 0.03607559 | 0.54672104 |
| sp Q12805-2 FBLN3_HUMAN | 0.03607559 | 0.7214603  |
| sp B5ME19 EIFCL_HUMAN   | 0.03650475 | 0.09894868 |
| sp P50991-2 TCPD_HUMAN  | 0.03660584 | 0.29301754 |
| sp Q93052 LPP_HUMAN     | 0.03691101 | 0.61945313 |
| sp P14866-2 HNRPL_HUMAN | 0.0371418  | 0          |
| sp P04406 G3P_HUMAN     | 0.03726959 | 0          |
| sp P55327-3 TPD52_HUMAN | 0.03730393 | 0.19149946 |
| sp Q99460 PSMD1_HUMAN   | 0.03751564 | 0.3563347  |
| sp P63151-2 2ABA_HUMAN  | 0.03809738 | 0.312067   |
| sp O94973-2 AP2A2_HUMAN | 0.03825951 | 0.28377196 |
| sp P18077 RL35A_HUMAN   | 0.03856659 | 0.30372584 |
| sp Q14141-2 SEPT6_HUMAN | 0.03906441 | 0.656254   |
| sp Q14204 DYHC1_HUMAN   | 0.03932762 | 0.30084842 |
| sp P31947 1433S_HUMAN   | 0.03966522 | 0          |
| sp Q13596-2 SNX1_HUMAN  | 0.040411   | 0          |
| sp P00352 AL1A1_HUMAN   | 0.04094696 | 0.6864217  |
| sp Q9NTK5 OLA1_HUMAN    | 0.0412941  | 0          |
| sp P40939 ECHA_HUMAN    | 0.04155159 | 0.00415907 |
| sp P35270 SPRE_HUMAN    | 0.04191208 | 0.11949348 |
| sp Q16401-2 PSMD5_HUMAN | 0.04201889 | 0.0330081  |
| sp Q9Y5M8 SRPRB_HUMAN   | 0.04217529 | 0.25789237 |
| sp Q9P258 RCC2_HUMAN    | 0.04280853 | 0.40256184 |
| sp P63027 VAMP2_HUMAN   | 0.04290962 | 0          |

|                         |            |            |
|-------------------------|------------|------------|
| sp Q06278 AOXA_HUMAN    | 0.04292297 | 0          |
| sp P31948 STIP1_HUMAN   | 0.04299545 | 0          |
| sp Q93034 CUL5_HUMAN    | 0.04318237 | 0          |
| sp O43143 DHX15_HUMAN   | 0.04345512 | 0.33495146 |
| sp P61923 COPZ1_HUMAN   | 0.04438019 | 0.45033538 |
| sp P01011 AACT_HUMAN    | 0.04458618 | 0.28377232 |
| sp Q9H8H3 MET7A_HUMAN   | 0.04465103 | 0          |
| sp Q7L1Q6-2 BZW1_HUMAN  | 0.04481316 | 0          |
| sp O94804 STK10_HUMAN   | 0.04552841 | 0.19149946 |
| sp Q9Y262-2 EIF3L_HUMAN | 0.04572678 | 0.10861364 |
| sp Q13263 TIF1B_HUMAN   | 0.04595566 | 0.13973783 |
| sp P50395 GDIB_HUMAN    | 0.04655838 | 0.18887028 |
| sp P45974-2 UBP5_HUMAN  | 0.04734421 | 0.5368848  |
| sp P08559-2 ODPA_HUMAN  | 0.04737473 | 0.12054814 |
| sp P14314-2 GLU2B_HUMAN | 0.0474453  | 0.47871065 |
| sp P09104-2 ENOG_HUMAN  | 0.04744911 | 0.37061578 |
| sp P39019 RS19_HUMAN    | 0.04754067 | 0.2178309  |
| sp P11142 HSP7C_HUMAN   | 0.04762077 | 0.26694477 |
| sp Q13363-2 CTBP1_HUMAN | 0.04790878 | 0.19149946 |
| sp P06744 G6PI_HUMAN    | 0.04798889 | 0.22627127 |
| sp Q12907 LMAN2_HUMAN   | 0.04886246 | 0.10861364 |
| sp Q92888-2 ARHG1_HUMAN | 0.04933167 | 0          |
| sp O00151 PDLI1_HUMAN   | 0.05038452 | 0.12054814 |
| sp P50502 F10A1_HUMAN   | 0.05066299 | 0.33495146 |
| sp P21589-2 5NTD_HUMAN  | 0.05078125 | 0.45033538 |
| sp P54886-2 P5CS_HUMAN  | 0.05123901 | 0          |
| sp P17174 AATC_HUMAN    | 0.05263901 | 0.58516645 |
| sp P02730 B3AT_HUMAN    | 0.05330277 | 0.7187941  |
| sp O43852-3 CALU_HUMAN  | 0.05338287 | 0.30372584 |
| sp P23229-4 ITA6_HUMAN  | 0.05359459 | 0          |
| sp Q12792-3 TWF1_HUMAN  | 0.05382156 | 0          |
| sp Q9UEY8 ADDG_HUMAN    | 0.05391693 | 0.02174174 |
| sp P52597 HNRPF_HUMAN   | 0.05508804 | 0.7217418  |
| sp Q96DG6 CMBL_HUMAN    | 0.05581856 | 0.2178309  |
| sp P78406 RAE1L_HUMAN   | 0.05666351 | 0.312067   |
| sp P09972 ALDOC_HUMAN   | 0.05899429 | 0.26737198 |
| sp P00558 PGK1_HUMAN    | 0.05928421 | 0.01406953 |
| sp P0DMV9 HS71B_HUMAN   | 0.05935097 | 0.27482995 |
| sp P55265-4 DSRAD_HUMAN | 0.05960846 | 0.43633315 |
| sp Q12906-4 ILF3_HUMAN  | 0.06050301 | 0.9764444  |
| sp P62995-3 TRA2B_HUMAN | 0.06073189 | 0.7827403  |
| sp P29144 TPP2_HUMAN    | 0.06146622 | 0          |
| sp P58107 EPIPL_HUMAN   | 0.06224251 | 0.01073991 |
| sp P05166-2 PCCB_HUMAN  | 0.06230545 | 0.3005443  |
| sp Q92900-2 RENT1_HUMAN | 0.06300163 | 0.16649151 |

|                           |            |            |
|---------------------------|------------|------------|
| sp P51665 PSMD7_HUMAN     | 0.06344414 | 0          |
| sp P62736 ACTA_HUMAN      | 0.06345367 | 0          |
| sp Q8TAT6-2 NPL4_HUMAN    | 0.06371117 | 0.35193655 |
| sp P62333 PRS10_HUMAN     | 0.06420898 | 0.79861414 |
| sp P07384 CAN1_HUMAN      | 0.06424904 | 0.3096179  |
| sp Q13347 EIF3I_HUMAN     | 0.0647049  | 0.20467198 |
| sp P26641 EF1G_HUMAN      | 0.06483841 | 0.22817776 |
| sp O43294 TGFI1_HUMAN     | 0.06512451 | 0.45033538 |
| sp Q02543 RL18A_HUMAN     | 0.06532478 | 0.51870745 |
| sp P30419-2 NMT1_HUMAN    | 0.06567955 | 0.656254   |
| sp P35637-2 FUS_HUMAN     | 0.0662899  | 0.45033538 |
| sp Q9P2X0-2 DPM3_HUMAN    | 0.06633186 | 0.19149946 |
| sp Q15257-2 PTPA_HUMAN    | 0.06745338 | 0.48520416 |
| sp P14618 KPYM_HUMAN      | 0.06746864 | 0.04454162 |
| sp P05387 RLA2_HUMAN      | 0.06751251 | 0.7827403  |
| sp P62081 RS7_HUMAN       | 0.0676918  | 0.2178309  |
| sp Q9UBG0 MRC2_HUMAN      | 0.06895065 | 0.16649151 |
| sp P55809 SCOT1_HUMAN     | 0.0693531  | 0.09894868 |
| sp P68400 CSK21_HUMAN     | 0.06963158 | 0.2178309  |
| sp Q9Y224 RTRAF_HUMAN     | 0.07017899 | 0.26737198 |
| sp P11498 PYC_HUMAN       | 0.07024765 | 0.28516325 |
| sp O43681 ASNA_HUMAN      | 0.07034683 | 0          |
| sp P07358 CO8B_HUMAN      | 0.07044411 | 0.1342476  |
| sp Q13724-2 MOGS_HUMAN    | 0.07069969 | 0.34323573 |
| sp Q13464 ROCK1_HUMAN     | 0.0721302  | 0          |
| sp A0A0C4DH31 HV118_HUMAN | 0.07217789 | 0          |
| sp A0AVT1 UBA6_HUMAN      | 0.07246018 | 0          |
| sp P13639 EF2_HUMAN       | 0.07258034 | 0.8991083  |
| sp Q5TFE4 NT5D1_HUMAN     | 0.0727005  | 0          |
| sp O95782-2 AP2A1_HUMAN   | 0.07276726 | 0.65625405 |
| sp Q9UNM6-2 PSD13_HUMAN   | 0.07379913 | 0.20467198 |
| sp Q14258 TRI25_HUMAN     | 0.07408142 | 0.7740364  |
| sp O43776 SYNC_HUMAN      | 0.07533836 | 0.37060758 |
| sp Q8NF91-4 SYNE1_HUMAN   | 0.07565498 | 0          |
| sp O14579 COPE_HUMAN      | 0.07670975 | 0.48520416 |
| sp O14617-4 AP3D1_HUMAN   | 0.07688141 | 0          |
| sp Q13200 PSMD2_HUMAN     | 0.07711601 | 0          |
| sp P49189 AL9A1_HUMAN     | 0.07730484 | 0.79074126 |
| sp P60228 EIF3E_HUMAN     | 0.07822418 | 0.45563722 |
| sp P62249 RS16_HUMAN      | 0.07849121 | 0.09894868 |
| sp P07305-2 H10_HUMAN     | 0.0786171  | 0          |
| sp P11586 C1TC_HUMAN      | 0.07862473 | 0.2178309  |
| sp Q16774 KGUA_HUMAN      | 0.07881165 | 0          |
| sp P48739 PIPNB_HUMAN     | 0.07889748 | 0          |
| sp P08238 HS90B_HUMAN     | 0.07923126 | 1.2765499  |



|                         |            |            |
|-------------------------|------------|------------|
| sp Q15008-4 PSMD6_HUMAN | 0.07954788 | 0.45033538 |
| sp Q92696 PGTA_HUMAN    | 0.07984924 | 0.37060758 |
| sp P20039 2B1B_HUMAN    | 0.08019829 | 0.656254   |
| sp Q99832 TCPH_HUMAN    | 0.08023834 | 0.95492345 |
| sp Q8N392 RHG18_HUMAN   | 0.08029366 | 0          |
| sp P08237-3 PFKAM_HUMAN | 0.0805378  | 0.56808305 |
| sp P13798 ACPH_HUMAN    | 0.08077622 | 1.1054204  |
| sp Q08379 GOGA2_HUMAN   | 0.08097744 | 0.7827403  |
| sp Q16851 UGPA_HUMAN    | 0.08346367 | 0.03208591 |
| sp Q92841-3 DDX17_HUMAN | 0.08366394 | 0.25398457 |
| sp O14558 HSPB6_HUMAN   | 0.08368778 | 0.65625405 |
| sp O14773 TPP1_HUMAN    | 0.08375359 | 0.6298893  |
| sp P57737-4 CORO7_HUMAN | 0.08432007 | 0.45033538 |
| sp P42785-2 PCP_HUMAN   | 0.08449554 | 1.0301651  |
| sp Q9NR56-2 MBNL1_HUMAN | 0.08587074 | 0          |
| sp Q14240-2 IF4A2_HUMAN | 0.08611298 | 0.40256184 |
| sp Q15102 PA1B3_HUMAN   | 0.08682442 | 0.5204253  |
| sp O60664-4 PLIN3_HUMAN | 0.08714867 | 0.56808305 |
| sp Q9UBE0 SAE1_HUMAN    | 0.08721924 | 0.5204253  |
| sp O95394-3 AGM1_HUMAN  | 0.08790588 | 0          |
| sp P31150 GDIA_HUMAN    | 0.08963585 | 0.17106695 |
| sp P35527 K1C9_HUMAN    | 0.08966255 | 0.57177407 |
| sp P62244 RS15A_HUMAN   | 0.09090424 | 0.45033538 |
| sp P67775 PP2AA_HUMAN   | 0.09098625 | 0          |
| sp P62140 PP1B_HUMAN    | 0.091259   | 0.09894868 |
| sp Q9H6S3 ES8L2_HUMAN   | 0.0915823  | 0.19149946 |
| sp Q86WV6 STING_HUMAN   | 0.09177589 | 0.35795313 |
| sp P23526 SAHH_HUMAN    | 0.09204483 | 0.95888454 |
| sp P55795 HNRH2_HUMAN   | 0.09245873 | 0.35193655 |
| sp Q9P2T1-2 GMPR2_HUMAN | 0.09339905 | 0.4075265  |
| sp Q13243-3 SRSF5_HUMAN | 0.09363937 | 0.656254   |
| sp P47897 SYQ_HUMAN     | 0.09436417 | 0.14672586 |
| sp P12956 XRCC6_HUMAN   | 0.09550285 | 0.82809293 |
| sp P29218 IMPA1_HUMAN   | 0.09562111 | 0.02662771 |
| sp Q96FV2-2 SCRN2_HUMAN | 0.09573746 | 0.45033538 |
| sp O00170 AIP_HUMAN     | 0.09653664 | 1.2095301  |
| sp P26639-2 SYTC_HUMAN  | 0.0976162  | 0.907945   |
| sp O43865 SAHH2_HUMAN   | 0.09841442 | 0.35795313 |
| sp P43243 MATR3_HUMAN   | 0.09852219 | 0.33495146 |
| sp P52306-4 GDS1_HUMAN  | 0.09864235 | 0.5204253  |
| sp P23368 MAOM_HUMAN    | 0.10067368 | 1.2805575  |
| sp Q9GZM7-3 TINAL_HUMAN | 0.10087681 | 0          |
| sp P69905 HBA_HUMAN     | 0.10139465 | 0.23541966 |
| sp Q07020-2 RL18_HUMAN  | 0.10142326 | 0.35795313 |
| sp P62277 RS13_HUMAN    | 0.10164261 | 1.2095301  |

|                         |            |            |
|-------------------------|------------|------------|
| sp Q03519 TAP2_HUMAN    | 0.10328865 | 0.656254   |
| sp P24821-4 TENA_HUMAN  | 0.10340309 | 0.76289684 |
| sp P62913-2 RL11_HUMAN  | 0.10391617 | 0.7827403  |
| sp P12814 ACTN1_HUMAN   | 0.10469055 | 0          |
| sp Q9UK22 FBX2_HUMAN    | 0.10483551 | 0          |
| sp O14980 XPO1_HUMAN    | 0.10488129 | 0.2178309  |
| sp Q9NPH2 INO1_HUMAN    | 0.10540199 | 0.9533461  |
| sp Q9HC38 GLOD4_HUMAN   | 0.10557556 | 0.9533461  |
| sp P15144 AMPN_HUMAN    | 0.10570717 | 0.87291557 |
| sp Q01813-2 PFKAP_HUMAN | 0.10647774 | 0.26737198 |
| sp P63244 RACK1_HUMAN   | 0.10650253 | 0.7187941  |
| sp Q9H4A4 AMPB_HUMAN    | 0.10728645 | 0.52713376 |
| sp Q9Y3I0 RTCB_HUMAN    | 0.10778427 | 0.83646035 |
| sp P31321 KAP1_HUMAN    | 0.10791397 | 0          |
| sp P55735-2 SEC13_HUMAN | 0.10798836 | 0.6298893  |
| sp Q14974 IMB1_HUMAN    | 0.10857773 | 0.8826702  |
| sp O14745 NHRF1_HUMAN   | 0.10873032 | 1.1505735  |
| sp P12277 KCRB_HUMAN    | 0.10874367 | 0.11075022 |
| sp Q8IU7 AEBP1_HUMAN    | 0.10882568 | 0.7957244  |
| sp Q12797-10 ASPH_HUMAN | 0.10895729 | 1.1932943  |
| sp P09012 SNRPA_HUMAN   | 0.10974693 | 0.19149946 |
| sp O95479 G6PE_HUMAN    | 0.10991097 | 0.7588735  |
| sp P50579-2 MAP2_HUMAN  | 0.11003876 | 0.19149946 |
| sp P12814-2 ACTN1_HUMAN | 0.11042023 | 0.7827403  |
| sp P07360 CO8G_HUMAN    | 0.11166954 | 0.7827403  |
| sp Q92499 DDX1_HUMAN    | 0.11171722 | 0.66088426 |
| sp P55060-3 XPO2_HUMAN  | 0.11266327 | 0.52598757 |
| sp Q92598-2 HS105_HUMAN | 0.1128521  | 0.656254   |
| sp P50454 SERPH_HUMAN   | 0.11289597 | 1.1791906  |
| sp P49588-2 SYAC_HUMAN  | 0.11331368 | 0.7187941  |
| sp P56134-3 ATPK_HUMAN  | 0.11456299 | 0          |
| sp P02042 HBD_HUMAN     | 0.11460877 | 0.56808305 |
| sp Q08378 GOGA3_HUMAN   | 0.11497593 | 0          |
| sp P00966 ASSY_HUMAN    | 0.11553955 | 0.48757824 |
| sp O43301 HS12A_HUMAN   | 0.11652565 | 1.2095301  |
| sp O94788-3 AL1A2_HUMAN | 0.1166935  | 0.656254   |
| sp Q32P44 EMAL3_HUMAN   | 0.11697578 | 0.35795313 |
| sp Q9NQW7-3 XPP1_HUMAN  | 0.11754608 | 0.05145278 |
| sp P09874 PARP1_HUMAN   | 0.11950111 | 0.51870745 |
| sp O75746-2 CMC1_HUMAN  | 0.12026596 | 0.80804527 |
| sp P32455 GBP1_HUMAN    | 0.12030029 | 0.3005443  |
| sp P0CG38 POT1_HUMAN    | 0.12036324 | 0.656254   |
| sp O75306-2 NDUS2_HUMAN | 0.12068939 | 1.0485198  |
| sp P01591 IGJ_HUMAN     | 0.12128067 | 0.19149946 |
| sp P34932 HSP74_HUMAN   | 0.12243652 | 0.6083562  |

|                         |            |            |
|-------------------------|------------|------------|
| sp O43790 KRT86_HUMAN   | 0.12249756 | 0.656254   |
| sp O00487 PSDE_HUMAN    | 0.12338257 | 0.19149946 |
| sp Q14914-2 PTGR1_HUMAN | 0.12379646 | 0.1342476  |
| sp Q15661 TRYB1_HUMAN   | 0.12404823 | 0.8244277  |
| sp P48147 PPCE_HUMAN    | 0.12406921 | 0.3201336  |
| sp P08865 RSSA_HUMAN    | 0.12421227 | 1.0951192  |
| sp Q8WX93-5 PALLD_HUMAN | 0.12454987 | 0.5204253  |
| sp Q3LXA3 TKFC_HUMAN    | 0.12480545 | 0.8887816  |
| sp P50995-2 ANX11_HUMAN | 0.12741852 | 1.0916015  |
| sp Q9Y383-3 LC7L2_HUMAN | 0.12790298 | 1.1505735  |
| sp P20810-4 ICAL_HUMAN  | 0.12795639 | 0.2178309  |
| sp Q9NSK0-5 KLC4_HUMAN  | 0.12862778 | 0.656254   |
| sp O94776 MTA2_HUMAN    | 0.12961197 | 0.6298893  |
| sp Q00610-2 CLH1_HUMAN  | 0.13000488 | 0.9237222  |
| sp P07951 TPM2_HUMAN    | 0.13087273 | 0.7957244  |
| sp O14744 ANM5_HUMAN    | 0.13118362 | 0.45033538 |
| sp P98095-2 FBLN2_HUMAN | 0.13200378 | 1.0757319  |
| sp O75340-2 PDCD6_HUMAN | 0.13351631 | 0.7061832  |
| sp O75964 ATP5L_HUMAN   | 0.13371277 | 0.7827403  |
| sp Q6P2Q9 PRP8_HUMAN    | 0.13410568 | 0.5204253  |
| sp Q9UNS2 CSN3_HUMAN    | 0.13467789 | 0.656254   |
| sp Q9NP79 VTA1_HUMAN    | 0.13520241 | 0.91601294 |
| sp Q9NQG5 RPR1B_HUMAN   | 0.13522911 | 0.91601294 |
| sp Q12882 DPYD_HUMAN    | 0.13636017 | 1.1932944  |
| sp P62195 PRS8_HUMAN    | 0.13661194 | 0          |
| sp P12268 IMDH2_HUMAN   | 0.13677597 | 0.19149946 |
| sp P0DJ18 SAA1_HUMAN    | 0.13787079 | 0.19149946 |
| sp Q15005 SPCS2_HUMAN   | 0.13838768 | 1.1505735  |
| sp P24534 EF1B_HUMAN    | 0.13842773 | 0.45033538 |
| sp P30043 BLVRB_HUMAN   | 0.13893127 | 0.8983557  |
| sp P15374 UCHL3_HUMAN   | 0.14108086 | 1.2095301  |
| sp Q86VP6 CAND1_HUMAN   | 0.1420784  | 1.1610394  |
| sp O43396 TXNL1_HUMAN   | 0.14236069 | 0.7827403  |
| sp P46821 MAP1B_HUMAN   | 0.14398575 | 0.69308156 |
| sp P54802 ANAG_HUMAN    | 0.1440506  | 0.19149946 |
| sp Q8TD06 AGR3_HUMAN    | 0.14652634 | 0          |
| sp Q93009-3 UBP7_HUMAN  | 0.1489582  | 1.1932944  |
| sp Q15274 NADC_HUMAN    | 0.14901352 | 0.91601294 |
| sp O43488 ARK72_HUMAN   | 0.14978409 | 0.1342476  |
| sp P27695 APEX1_HUMAN   | 0.15175629 | 0.19149946 |
| sp P68871 HBB_HUMAN     | 0.1518364  | 1.1791906  |
| sp O76074-2 PDE5A_HUMAN | 0.15264416 | 0.80804527 |
| sp Q9Y315 DEOC_HUMAN    | 0.15409279 | 1.0485198  |
| sp Q8TD19 NEK9_HUMAN    | 0.15450478 | 0.45033538 |
| sp Q53GG5-2 PDLI3_HUMAN | 0.15462303 | 0.30372584 |

|                          |            |            |
|--------------------------|------------|------------|
| sp Q9C0E8-4 LNP_HUMAN    | 0.15482998 | 0          |
| sp P19404 NDUV2_HUMAN    | 0.15567398 | 0.312067   |
| sp Q9BZE9-2 ASPC1_HUMAN  | 0.15625954 | 0.656254   |
| sp O95302-3 FKBP9_HUMAN  | 0.1583252  | 0.19149946 |
| sp Q9BVK6 TMED9_HUMAN    | 0.16076088 | 0.91601294 |
| sp P22102 PUR2_HUMAN     | 0.1655693  | 0.8983557  |
| sp P52888 THOP1_HUMAN    | 0.16568375 | 0.45033538 |
| sp Q7Z4H8 PLGT3_HUMAN    | 0.16685867 | 0.656254   |
| sp Q06210-2 GFPT1_HUMAN  | 0.17160034 | 0.95332193 |
| sp Q9UBS4 DJB11_HUMAN    | 0.17198372 | 1.1932944  |
| sp P62191-2 PRS4_HUMAN   | 0.17450333 | 0.5204253  |
| sp Q13557-12 KCC2D_HUMAN | 0.17508698 | 1.214352   |
| sp O60825-2 F262_HUMAN   | 0.17518616 | 0.656254   |
| sp Q13885 TBB2A_HUMAN    | 0.17782974 | 0          |
| sp P84243 H33_HUMAN      | 0.18048954 | 0          |
| sp O94919 ENDD1_HUMAN    | 0.18122292 | 0          |
| sp P62829 RL23_HUMAN     | 0.18126678 | 0.7827403  |
| sp P15880 RS2_HUMAN      | 0.1818428  | 1.0485198  |
| sp P68371 TBB4B_HUMAN    | 0.18252563 | 0          |
| sp P35858-2 ALS_HUMAN    | 0.18305016 | 0.19149946 |
| sp Q96D15 RCN3_HUMAN     | 0.18352413 | 0.7061832  |
| sp P14174 MIF_HUMAN      | 0.18365479 | 1.1505735  |
| sp P62917 RL8_HUMAN      | 0.18475723 | 1.1791906  |
| sp P31939 PUR9_HUMAN     | 0.18611145 | 0.8706143  |
| sp Q15185-3 TEBP_HUMAN   | 0.18625641 | 0.45033538 |
| sp P15559-2 NQO1_HUMAN   | 0.18990898 | 0.45033538 |
| sp O43252 PAPS1_HUMAN    | 0.19108582 | 1.1505735  |
| sp O60832 DKC1_HUMAN     | 0.19112968 | 1.1932944  |
| sp P02760 AMBP_HUMAN     | 0.19190979 | 0.47871065 |
| sp O75489 NDUS3_HUMAN    | 0.19235802 | 0.8983557  |
| sp P46781 RS9_HUMAN      | 0.19284439 | 0.68594354 |
| sp P10644 KAP0_HUMAN     | 0.19339752 | 0.312067   |
| sp P14618-2 KPYM_HUMAN   | 0.19566917 | 0.7061832  |
| sp Q8TAQ2-2 SMRC2_HUMAN  | 0.1957264  | 0.80804527 |
| sp Q8TBC4-2 UBA3_HUMAN   | 0.19703674 | 1.1932944  |
| sp P07738 PMGE_HUMAN     | 0.1993866  | 0.8983557  |
| sp Q93084-2 AT2A3_HUMAN  | 0.19970131 | 0.45033538 |
| sp P53992 SC24C_HUMAN    | 0.20035744 | 0.6298893  |
| sp Q16134-3 ETFD_HUMAN   | 0.20175076 | 1.1932944  |
| sp P30837 AL1B1_HUMAN    | 0.20492554 | 1.1791906  |
| sp Q7Z7G0 TARSH_HUMAN    | 0.20555115 | 1.1932944  |
| sp P49721 PSB2_HUMAN     | 0.2063961  | 0.19149946 |
| sp P32456 GBP2_HUMAN     | 0.20656204 | 0          |
| sp P02751-15 FINC_HUMAN  | 0.20698357 | 0.656254   |
| sp Q15436 SC23A_HUMAN    | 0.20734501 | 0.1342476  |

|                         |            |            |
|-------------------------|------------|------------|
| sp P46459 NSF_HUMAN     | 0.20743942 | 0.8983557  |
| sp P61353 RL27_HUMAN    | 0.2120781  | 1.1932944  |
| sp Q66K74-2 MAP1S_HUMAN | 0.21217251 | 1.1932944  |
| sp O75828 CBR3_HUMAN    | 0.21236229 | 1.1932944  |
| sp Q6XQN6-2 PNCB_HUMAN  | 0.212574   | 0.9847622  |
| sp Q99538-2 LGMN_HUMAN  | 0.21278763 | 1.1932944  |
| sp Q96AY3 FKB10_HUMAN   | 0.22075272 | 0.6070219  |
| sp O95994 AGR2_HUMAN    | 0.22115898 | 1.3006523  |
| sp P42704 LPPRC_HUMAN   | 0.22696877 | 1.0076748  |
| sp P18583-10 SON_HUMAN  | 0.23055267 | 1.1932944  |
| sp P54136 SYRC_HUMAN    | 0.24118996 | 0.84879977 |
| sp P55145 MANF_HUMAN    | 0.24543    | 1.1932944  |
| sp Q5R3I4 TTC38_HUMAN   | 0.24547386 | 0.45033538 |
| sp P42226 STAT6_HUMAN   | 0.24783897 | 0.656254   |
| sp O14787-2 TNPO2_HUMAN | 0.24894047 | 0.656254   |
| sp O76011 KRT34_HUMAN   | 0.256485   | 0.656254   |
| sp Q92599-3 SEPT8_HUMAN | 0.25716972 | 1.1932944  |
| sp Q9UJZ1-2 STML2_HUMAN | 0.2575674  | 0.91601294 |
| sp P02747 C1QC_HUMAN    | 0.2587185  | 1.1932944  |
| sp P50135 HNMT_HUMAN    | 0.25972748 | 0.45033538 |
| sp P31689-2 DNJA1_HUMAN | 0.2666092  | 1.1932944  |
| sp Q9Y5P6-2 GMPPB_HUMAN | 0.26906586 | 1.0301651  |
| sp Q96HY6 DDR GK_HUMAN  | 0.2733717  | 0.656254   |
| sp Q6UW68 TM205_HUMAN   | 0.2736187  | 1.1932944  |
| sp P02763 A1AG1_HUMAN   | 0.27404594 | 0.80804527 |
| sp Q13310-2 PABP4_HUMAN | 0.27405357 | 0.656254   |
| sp P61803 DAD1_HUMAN    | 0.27931404 | 0.656254   |
| sp P40123-2 CAP2_HUMAN  | 0.2829666  | 0          |
| sp Q04446 GLGB_HUMAN    | 0.28380966 | 0.5692702  |
| sp O14791-2 APOL1_HUMAN | 0.2875023  | 1.1932944  |
| sp P04062-2 GLCM_HUMAN  | 0.28876114 | 0.6070219  |
| sp P08779 K1C16_HUMAN   | 0.28970242 | 0.19149946 |
| sp Q06033-2 ITIH3_HUMAN | 0.29623985 | 0.7827403  |
| sp P02746 C1QB_HUMAN    | 0.29746628 | 1.1932944  |
| sp P62854 RS26_HUMAN    | 0.29994965 | 1.1932944  |
| sp P69892 HBG2_HUMAN    | 0.3071804  | 0.656254   |
| sp Q14697 GANAB_HUMAN   | 0.31155396 | 1.1932944  |
| sp P27635 RL10_HUMAN    | 0.31227493 | 0.656254   |
| sp O60701-2 UGDH_HUMAN  | 0.3138733  | 0.656254   |
| sp P55058 PLTP_HUMAN    | 0.31573105 | 1.1932944  |
| sp Q13247-3 SRSF6_HUMAN | 0.31818962 | 0.45033538 |
| sp P16144-2 ITB4_HUMAN  | 0.31824398 | 0.7827403  |
| sp P12111-4 CO6A3_HUMAN | 0.32121277 | 0.656254   |
| sp P01619 KV320_HUMAN   | 0.3221016  | 0.656254   |
| sp Q9HD45 TM9S3_HUMAN   | 0.32566452 | 1.1932944  |

|                           |            |            |
|---------------------------|------------|------------|
| sp O75533 SF3B1_HUMAN     | 0.32688332 | 1.1932944  |
| sp P54577 SYYC_HUMAN      | 0.3303299  | 0.7061832  |
| sp P09871 C1S_HUMAN       | 0.3389778  | 0.09894868 |
| sp P05155-2 IC1_HUMAN     | 0.33935928 | 1.1932944  |
| sp Q7L576 CYFP1_HUMAN     | 0.3530922  | 0.6070219  |
| sp Q05682 CALD1_HUMAN     | 0.35460186 | 0.2178309  |
| sp P52895 AK1C2_HUMAN     | 0.36023903 | 0.19149946 |
| sp P84098 RL19_HUMAN      | 0.36663246 | 0.7827403  |
| sp P23083 HV102_HUMAN     | 0.3686409  | 0.656254   |
| sp P02533 K1C14_HUMAN     | 0.37032318 | 0.45033538 |
| sp P13928 ANXA8_HUMAN     | 0.37114716 | 1.1932944  |
| sp Q15149-3 PLEC_HUMAN    | 0.37446213 | 0.656254   |
| sp Q15323 K1H1_HUMAN      | 0.3802147  | 0.656254   |
| sp A0A0B4J1X8 HV343_HUMAN | 0.38097763 | 0.656254   |
| sp Q9HCN8 SDF2L_HUMAN     | 0.3959732  | 1.1932944  |
| sp Q9BX97 PLVAP_HUMAN     | 0.40327835 | 1.1932944  |
| sp Q96IJ6-2 GMPPA_HUMAN   | 0.40448952 | 1.1932944  |
| sp O94855-2 SC24D_HUMAN   | 0.40451622 | 1.1932944  |
| sp A0A0C4DH29 HV103_HUMAN | 0.40841484 | 0.656254   |
| sp P08185 CBG_HUMAN       | 0.41263962 | 1.1932944  |
| sp P61018-2 RAB4B_HUMAN   | 0.4138813  | 0.656254   |
| sp Q15063-2 POSTN_HUMAN   | 0.42027092 | 0.656254   |
| sp Q15063-3 POSTN_HUMAN   | 0.46837616 | 1.1932944  |
| sp P46779-2 RL28_HUMAN    | 0.47846222 | 1.2095301  |
| sp P62910 RL32_HUMAN      | 0.4838543  | 1.1932944  |
| sp P06310 KV230_HUMAN     | 0.48698616 | 0.656254   |
| sp P47895 AL1A3_HUMAN     | 0.4906149  | 0.656254   |
| sp Q9BWS9-3 CHID1_HUMAN   | 0.49173355 | 0.656254   |
| sp Q08170 SRSF4_HUMAN     | 0.5091982  | 0.656254   |
| sp Q15046 SYK_HUMAN       | 0.55125046 | 0.656254   |
| sp Q687X5 STEA4_HUMAN     | 0.5844059  | 1.1932944  |
| sp P35080-2 PROF2_HUMAN   | 0.6588135  | 0.656254   |
| sp A0A0C4DH25 KVD20_HUMAN | 0.6743965  | 0.656254   |
| sp P48741 HSP77_HUMAN     | 0.7063198  | 0.656254   |
| sp P46977 STT3A_HUMAN     | 0.7264805  | 1.1932944  |
| sp P35542 SAA4_HUMAN      | 0.72792625 | 1.1932944  |
| sp A0A0C4DH38 HV551_HUMAN | 0.7502117  | 1.1932944  |
| sp P01782 HV309_HUMAN     | 0.75719833 | 0.656254   |
| sp P01624 KV315_HUMAN     | 0.7973633  | 1.1932944  |
| sp P14207 FOLR2_HUMAN     | 0.85708046 | 0.656254   |
| sp P01834 IGKC_HUMAN      | 0.8639355  | 1.1932944  |
| sp Q03591 FHR1_HUMAN      | 0.8907776  | 1.1932944  |
| sp A0A075B6P5 KV228_HUMAN | 0.91993904 | 0.656254   |
| sp PODP03 HV335_HUMAN     | 0.9296398  | 1.1932944  |
| sp P01780 HV307_HUMAN     | 0.9698124  | 0.656254   |

|                           |           |           |
|---------------------------|-----------|-----------|
| sp Q13938-4 CAYP1_HUMAN   | 1.0082302 | 0.656254  |
| sp P02461 CO3A1_HUMAN     | 1.0347652 | 1.1932944 |
| sp Q13976-2 KGP1_HUMAN    | 1.081934  | 0.656254  |
| sp A0A0C4DH41 HV461_HUMAN | 1.139904  | 0.656254  |
| sp POCOL4 CO4A_HUMAN      | 1.151926  | 1.1932944 |
| sp P00738 HPT_HUMAN       | 1.2329216 | 0.656254  |
| sp POCOL5 CO4B_HUMAN      | 1.5534401 | 1.1932944 |
