# Supplementary material for: Peptidylarginine deiminase 2 citrullinates MZB1 and promotes the secretion of IgM and IgA
Source: PubMed Central journal article supplement (PMC10716219; doi:10.3389/fimmu.2023.1290585), 2023-11-29
Supplement: DataSheet_7.pdf [file DataSheet_7.pdf]

## Supplemental Table 7: IPF1 vs controls

| Accession #             | Fold Change | p value (-log10) |
|-------------------------|-------------|------------------|
| sp P13760 2B14_HUMAN    | -1.2406063  | 1.6960104        |
| sp P05164-3 PERM_HUMAN  | -0.964447   | 9.925412         |
| sp Q15109-10 RAGE_HUMAN | -0.7791596  | 1.6997428        |
| sp P50897-2 PPT1_HUMAN  | -0.730835   | 1.6960104        |
| sp P59666 DEF3_HUMAN    | -0.7227097  | 2.1818786        |
| sp P41218 MNDA_HUMAN    | -0.704237   | 1.6604291        |
| sp P07339 CATD_HUMAN    | -0.6734581  | 7.2183566        |
| sp P22748 CAH4_HUMAN    | -0.6611595  | 2.1818786        |
| sp P62805 H4_HUMAN      | -0.6488762  | 6.3204336        |
| sp P31949 S10AB_HUMAN   | -0.6433296  | 2.6576471        |
| sp P60903 S10AA_HUMAN   | -0.6258736  | 1.6960104        |
| sp P80188 NGAL_HUMAN    | -0.600193   | 2.1800864        |
| sp P08174-3 DAF_HUMAN   | -0.557827   | 1.6960104        |
| sp P12821-2 ACE_HUMAN   | -0.5410538  | 2.3143692        |
| sp P10253 LYAG_HUMAN    | -0.5363674  | 3.5908275        |
| sp P24158 PRTN3_HUMAN   | -0.5284939  | 1.6960104        |
| sp Q13510-2 ASAH1_HUMAN | -0.527401   | 4.2164803        |
| sp P02786 TFR1_HUMAN    | -0.5253449  | 3.4802763        |
| sp P84103-2 SRSF3_HUMAN | -0.5169964  | 1.6295799        |
| sp P09467 F16P1_HUMAN   | -0.49646    | 2.9903855        |
| sp P07305 H10_HUMAN     | -0.4863873  | 1.6960104        |
| sp P61626 LYSC_HUMAN    | -0.4641457  | 3.1266599        |
| sp P18428 LBP_HUMAN     | -0.4521103  | 1.3815327        |
| sp P07858 CATB_HUMAN    | -0.4483414  | 2.400925         |
| sp P20160 CAP7_HUMAN    | -0.4368668  | 1.4104178        |
| sp P08311 CATG_HUMAN    | -0.4357147  | 2.6576471        |
| sp P02769 ALBU_BOVIN    | -0.4114609  | 6.879847         |
| sp Q01469 FABP5_HUMAN   | -0.3950081  | 3.364204         |
| sp P09758 TACD2_HUMAN   | -0.3827324  | 1.3635377        |
| sp P50895 BCAM_HUMAN    | -0.3640003  | 4.285869         |
| sp P01011 AACT_HUMAN    | -0.3496418  | 5.3834457        |
| sp Q9UM07 PADI4_HUMAN   | -0.3349419  | 1.4104178        |
| sp Q9Y624 JAM1_HUMAN    | -0.3313084  | 1.6092666        |
| sp P05091 ALDH2_HUMAN   | -0.3143368  | 2.066954         |
| sp P26006-1 ITA3_HUMAN  | -0.3118286  | 1.4595377        |
| sp P21810 PGS1_HUMAN    | -0.3114948  | 4.0641108        |
| sp Q6PIU2-2 NCEH1_HUMAN | -0.3086166  | 1.4278674        |
| sp Q13740-2 CD166_HUMAN | -0.2976551  | 1.7565529        |
| sp P05023-4 AT1A1_HUMAN | -0.2892971  | 2.1937726        |
| sp P35527 K1C9_HUMAN    | -0.2881165  | 3.9267747        |
| sp P07686 HEXB_HUMAN    | -0.2813873  | 1.9509854        |
| sp Q9UGT4 SUSD2_HUMAN   | -0.278225   | 1.4050349        |
| sp P43490 NAMPT_HUMAN   | -0.2754631  | 2.3935137        |

|                         |            |           |
|-------------------------|------------|-----------|
| sp P06865 HEXA_HUMAN    | -0.2738838 | 1.3815327 |
| sp Q8NBQ5 DHB11_HUMAN   | -0.2654171 | 2.1800864 |
| sp P04179-4 SODM_HUMAN  | -0.2587547 | 1.8444856 |
| sp P35908 K22E_HUMAN    | -0.2524643 | 6.3250384 |
| sp P55268 LAMB2_HUMAN   | -0.2415085 | 2.7087963 |
| sp O96009 NAPSA_HUMAN   | -0.2304745 | 1.4278674 |
| sp P10412 H14_HUMAN     | -0.2224007 | 1.5054473 |
| sp P07237 PDIA1_HUMAN   | -0.2118359 | 2.207884  |
| sp P13645 K1C10_HUMAN   | -0.203516  | 5.2685075 |
| sp Q7Z406-2 MYH14_HUMAN | -0.2029724 | 1.716333  |
| sp Q9UHG3 PCYOX_HUMAN   | -0.2002239 | 1.3213577 |
| sp O95810 CAVN2_HUMAN   | -0.1599655 | 1.515701  |
| sp P04264 K2C1_HUMAN    | -0.0816689 | 3.7654986 |
| sp P01833 PIGR_HUMAN    | 0.1484375  | 1.8842831 |
| sp P19971 TYPH_HUMAN    | 0.16301918 | 1.6661506 |
| sp P13647 K2C5_HUMAN    | 0.17661476 | 1.9153107 |
| sp P22105-1 TENX_HUMAN  | 0.18163681 | 3.472686  |
| sp P15088 CBPA3_HUMAN   | 0.19852448 | 1.4278674 |
| sp P02730 B3AT_HUMAN    | 0.20829391 | 2.2535503 |
| sp P35555 FBN1_HUMAN    | 0.22310448 | 2.6576467 |
| sp P62269 RS18_HUMAN    | 0.22734642 | 1.6604291 |
| sp P02549-2 SPTA1_HUMAN | 0.24033737 | 3.9846432 |
| sp P21333-2 FLNA_HUMAN  | 0.24609375 | 2.5771337 |
| sp P00450 CERU_HUMAN    | 0.24838829 | 4.514301  |
| sp P15880 RS2_HUMAN     | 0.25235367 | 2.9807727 |
| sp P46782 RS5_HUMAN     | 0.25242996 | 1.6624602 |
| sp P35749-4 MYH11_HUMAN | 0.2607174  | 4.386148  |
| sp P02749 APOH_HUMAN    | 0.2667389  | 2.6997027 |
| sp P04217 A1BG_HUMAN    | 0.26778793 | 1.6046445 |
| sp P23381 SYWC_HUMAN    | 0.27154922 | 4.281241  |
| sp Q9NZ08-2 ERAP1_HUMAN | 0.271595   | 1.3567923 |
| sp Q9UL46 PSME2_HUMAN   | 0.2733612  | 1.9509854 |
| sp P49411 EFTU_HUMAN    | 0.2747059  | 1.5609726 |
| sp P28838-2 AMPL_HUMAN  | 0.2819538  | 1.5092005 |
| sp Q9H223 EHD4_HUMAN    | 0.2869892  | 1.5799892 |
| sp Q15746-3 MYLK_HUMAN  | 0.29870224 | 1.6295882 |
| sp P05156 CFAI_HUMAN    | 0.30791664 | 1.6832623 |
| sp Q13263 TIF1B_HUMAN   | 0.31331635 | 1.5555226 |
| sp Q06323 PSME1_HUMAN   | 0.31850243 | 3.622396  |
| sp Q15063-3 POSTN_HUMAN | 0.32172394 | 3.2009048 |
| sp P0DOX8 IGL1_HUMAN    | 0.3222828  | 2.6576471 |
| sp Q14315-2 FLNC_HUMAN  | 0.322834   | 6.797499  |
| sp P62424 RL7A_HUMAN    | 0.32369232 | 2.3305986 |
| sp Q96CX2 KCD12_HUMAN   | 0.32461166 | 1.5444825 |
| sp P00751 CFAB_HUMAN    | 0.33095932 | 5.9832516 |

|                         |            |           |
|-------------------------|------------|-----------|
| sp P23456 Trypsin       | 0.3378563  | 2.3388627 |
| sp P02774-3 VTDB_HUMAN  | 0.3423252  | 6.1391983 |
| sp P48735 IDHP_HUMAN    | 0.34759903 | 1.6046445 |
| sp P18124 RL7_HUMAN     | 0.35020065 | 2.817951  |
| sp P10909-5 CLUS_HUMAN  | 0.35831642 | 3.0019732 |
| sp P13671 CO6_HUMAN     | 0.35947418 | 1.6405568 |
| sp P07451 CAH3_HUMAN    | 0.37070084 | 1.3080103 |
| sp O00151 PDLI1_HUMAN   | 0.378994   | 2.12598   |
| sp P09874 PARP1_HUMAN   | 0.37918663 | 1.4751658 |
| sp P00740-2 FA9_HUMAN   | 0.38594055 | 1.8444856 |
| sp P43652 AFAM_HUMAN    | 0.3885479  | 4.3267694 |
| sp Q9UMS6-2 SYNP2_HUMAN | 0.39120674 | 1.7703108 |
| sp P67936-2 TPM4_HUMAN  | 0.39198685 | 1.6997428 |
| sp P01031 CO5_HUMAN     | 0.3943634  | 3.288843  |
| sp Q9BUT1 BDH2_HUMAN    | 0.3968544  | 1.560883  |
| sp P08603 CFAH_HUMAN    | 0.40758514 | 11.101238 |
| sp Q12805-2 FBLN3_HUMAN | 0.40948868 | 4.1295223 |
| sp P01019 ANGT_HUMAN    | 0.41119385 | 2.6576471 |
| sp P00734 THRB_HUMAN    | 0.41279602 | 3.8058946 |
| sp P62266 RS23_HUMAN    | 0.4130993  | 1.6960104 |
| sp P27635 RL10_HUMAN    | 0.41572762 | 1.6960104 |
| sp P46781 RS9_HUMAN     | 0.41714096 | 3.4656596 |
| sp P61247 RS3A_HUMAN    | 0.41906357 | 2.2323174 |
| sp P11171-2 41_HUMAN    | 0.42181015 | 1.6960104 |
| sp P17661 DESM_HUMAN    | 0.42771912 | 13.275162 |
| sp P02790 HEMO_HUMAN    | 0.43245506 | 6.2466874 |
| sp P00966 ASSY_HUMAN    | 0.43442917 | 1.5569298 |
| sp P54136 SYRC_HUMAN    | 0.4409752  | 1.8595492 |
| sp P04196 HRG_HUMAN     | 0.44153595 | 2.987788  |
| sp P01008 ANT3_HUMAN    | 0.44491005 | 4.9172535 |
| sp P04792 HSPB1_HUMAN   | 0.44491577 | 5.805384  |
| sp Q8N2S1-3 LTBP4_HUMAN | 0.44492912 | 2.702259  |
| sp P21291 CSRP1_HUMAN   | 0.44965363 | 3.658668  |
| sp P36578 RL4_HUMAN     | 0.4525032  | 3.4003167 |
| sp Q9NZN4 EHD2_HUMAN    | 0.4532814  | 7.040581  |
| sp P69891 HBG1_HUMAN    | 0.45342827 | 2.6576471 |
| sp P01042-2 KNG1_HUMAN  | 0.4542427  | 3.9849691 |
| sp P01023 A2MG_HUMAN    | 0.4583931  | 12.067423 |
| sp P61353 RL27_HUMAN    | 0.46709824 | 1.6960104 |
| sp P11277-3 SPTB1_HUMAN | 0.46987915 | 3.1092827 |
| sp Q05682 CALD1_HUMAN   | 0.47275925 | 1.7590232 |
| sp P02511 CRYAB_HUMAN   | 0.48090363 | 1.6960104 |
| sp P62913 RL11_HUMAN    | 0.4866333  | 1.6960104 |
| sp Q14624-2 ITIH4_HUMAN | 0.49407387 | 4.530363  |
| sp P29466-2 CASP1_HUMAN | 0.49465942 | 1.6960104 |

|                         |            |           |
|-------------------------|------------|-----------|
| sp P62241 RS8_HUMAN     | 0.50107193 | 2.4829872 |
| sp P50225 ST1A1_HUMAN   | 0.5039253  | 1.6960104 |
| sp P02787 TRFE_HUMAN    | 0.50450516 | 14.592862 |
| sp Q9NR12-2 PDLI7_HUMAN | 0.5208168  | 2.441399  |
| sp P0DOY2 IGLC2_HUMAN   | 0.5208397  | 2.1818786 |
| sp P25311 ZA2G_HUMAN    | 0.5265789  | 4.051346  |
| sp P62736 ACTA_HUMAN    | 0.53154564 | 3.545398  |
| sp P01876 IGHA1_HUMAN   | 0.53406143 | 2.9310203 |
| sp P00747 PLMN_HUMAN    | 0.54634476 | 4.461395  |
| sp P01861 IGHG4_HUMAN   | 0.54769325 | 2.6576471 |
| sp Q14767 LTBP2_HUMAN   | 0.5610771  | 7.2792387 |
| sp P26373 RL13_HUMAN    | 0.5648861  | 2.6576471 |
| sp P05546 HEP2_HUMAN    | 0.5679283  | 2.4982266 |
| sp Q9NZU5 LMCD1_HUMAN   | 0.57027054 | 5.6000037 |
| sp P84098 RL19_HUMAN    | 0.5884857  | 1.4104178 |
| sp P29622 KAIN_HUMAN    | 0.5897064  | 2.1818786 |
| sp P04003 C4BPA_HUMAN   | 0.5950031  | 4.367871  |
| sp P52943 CRIP2_HUMAN   | 0.60881805 | 1.9647322 |
| sp P30043 BLVRB_HUMAN   | 0.61424637 | 1.7590232 |
| sp P15428-5 PGDH_HUMAN  | 0.6161003  | 1.6960104 |
| sp Q01995 TAGL_HUMAN    | 0.63765335 | 6.264521  |
| sp P32969 RL9_HUMAN     | 0.6384182  | 1.6960104 |
| sp P32455 GBP1_HUMAN    | 0.6443615  | 3.9417877 |
| sp P00738-2 HPT_HUMAN   | 0.65237045 | 5.417897  |
| sp P00918 CAH2_HUMAN    | 0.66083527 | 4.876761  |
| sp P19823 ITIH2_HUMAN   | 0.66166306 | 5.869831  |
| sp P21266 GSTM3_HUMAN   | 0.67009354 | 3.4551415 |
| sp P19827 ITIH1_HUMAN   | 0.67022324 | 1.827201  |
| sp Q96PD5-2 PGRP2_HUMAN | 0.67350197 | 1.6960104 |
| sp P61254 RL26_HUMAN    | 0.6896839  | 2.1818786 |
| sp P42224-2 STAT1_HUMAN | 0.68989754 | 2.977915  |
| sp P32119 PRDX2_HUMAN   | 0.7154255  | 4.964395  |
| sp P07738 PMGE_HUMAN    | 0.7240448  | 2.1818786 |
| sp P02766 TTHY_HUMAN    | 0.7544441  | 1.3815327 |
| sp P09493-9 TPM1_HUMAN  | 0.764061   | 1.6960104 |
| sp P0DOX5 IGG1_HUMAN    | 0.7719612  | 4.509013  |
| sp P27169 PON1_HUMAN    | 0.7856159  | 1.6960104 |
| sp P04114 APOB_HUMAN    | 0.84806633 | 11.703171 |
| sp P48668 K2C6C_HUMAN   | 0.8779774  | 2.4829872 |
| sp Q9UBX5 FBLN5_HUMAN   | 0.91659164 | 4.051346  |
| sp P06727 APOA4_HUMAN   | 0.94646835 | 7.2183566 |
| sp P02042 HBD_HUMAN     | 0.97548103 | 3.5908275 |
| sp P00915 CAH1_HUMAN    | 1.1656532  | 6.3204336 |
| sp P68871 HBB_HUMAN     | 1.1691666  | 4.051346  |
| sp P02647 APOA1_HUMAN   | 1.2948189  | 13.420564 |

|                         |            |            |
|-------------------------|------------|------------|
| sp P02652 APOA2_HUMAN   | 1.3353729  | 2.5644996  |
| sp P69905 HBA_HUMAN     | 1.3428421  | 3.5908275  |
| sp P19013 K2C4_HUMAN    | 1.6130104  | 2.6576471  |
| sp P13646-3 K1C13_HUMAN | 2.6910114  | 2.6576471  |
| sp P04229 2B11_HUMAN    | -3.0526848 | 1.1932944  |
| sp P13761 2B17_HUMAN    | -1.8588295 | 0.656254   |
| sp P08246 ELNE_HUMAN    | -1.4635429 | 1.1932944  |
| sp P30453 1A34_HUMAN    | -1.444376  | 0.656254   |
| sp P49913 CAMP_HUMAN    | -1.1465454 | 1.1932944  |
| sp Q31612 1B73_HUMAN    | -1.0801373 | 0          |
| sp P10316 1A69_HUMAN    | -1.0369205 | 0.656254   |
| sp Q01518-2 CAP1_HUMAN  | -0.9289055 | 0.656254   |
| sp P25815 S100P_HUMAN   | -0.8826485 | 0.656254   |
| sp P61224 RAP1B_HUMAN   | -0.8797817 | 0.656254   |
| sp O00757 F16P2_HUMAN   | -0.8717346 | 0.7827403  |
| sp Q16777 H2A2C_HUMAN   | -0.6185513 | 0.656254   |
| sp P13498 CY24A_HUMAN   | -0.5984535 | 1.1932944  |
| sp P25774 CATS_HUMAN    | -0.5674019 | 0.7827403  |
| sp Q07075 AMPE_HUMAN    | -0.5594025 | 0.7061832  |
| sp O95716 RAB3D_HUMAN   | -0.5234032 | 0.656254   |
| sp P37235 HPCL1_HUMAN   | -0.5232678 | 0.656254   |
| sp Q13231-2 CHIT1_HUMAN | -0.5085526 | 0.6070219  |
| sp Q14956-2 GPNMB_HUMAN | -0.4913063 | 1.1932944  |
| sp P06703 S10A6_HUMAN   | -0.4888897 | 0.5204253  |
| sp P38159 RBMX_HUMAN    | -0.4632702 | 1.1932944  |
| sp P04908 H2A1B_HUMAN   | -0.4234314 | 0.656254   |
| sp Q14011 CIRBP_HUMAN   | -0.4224787 | 0.7827403  |
| sp P13284 GILT_HUMAN    | -0.4155703 | 1.1932944  |
| sp O95994 AGR2_HUMAN    | -0.4152622 | 1.0634323  |
| sp P55290-4 CAD13_HUMAN | -0.4109879 | 0.7061832  |
| sp P15559-3 NQO1_HUMAN  | -0.4086494 | 0.7061832  |
| sp P30491 1B53_HUMAN    | -0.405592  | 0.19149946 |
| sp Q01518 CAP1_HUMAN    | -0.402668  | 0.656254   |
| sp Q9NNW7 TRXR2_HUMAN   | -0.4008408 | 1.2095301  |
| sp P05109 S10A8_HUMAN   | -0.3782997 | 0.4075265  |
| sp P04839 CY24B_HUMAN   | -0.3774128 | 0.45033538 |
| sp P51608 MECP2_HUMAN   | -0.377388  | 1.1932944  |
| sp O43615 TIM44_HUMAN   | -0.375638  | 0.45033538 |
| sp P05534 1A24_HUMAN    | -0.3620033 | 0          |
| sp P99999 CYC_HUMAN     | -0.355978  | 0.65625405 |
| sp Q15056-2 IF4H_HUMAN  | -0.3371124 | 0.7827403  |
| sp Q6P4A8 PLBL1_HUMAN   | -0.3354626 | 0.7061832  |
| sp P02795 MT2_HUMAN     | -0.3352308 | 0.19149946 |
| sp P17213 BPI_HUMAN     | -0.3241692 | 0          |
| sp P00167-2 CYB5_HUMAN  | -0.3207378 | 0.91601294 |

|                         |            |            |
|-------------------------|------------|------------|
| sp P12694-2 ODBA_HUMAN  | -0.3185663 | 0.7827403  |
| sp Q9UFN0 NPS3A_HUMAN   | -0.3179894 | 0.80804527 |
| sp P63218 GBG5_HUMAN    | -0.3128929 | 0.7588735  |
| sp Q9NPY3 C1QR1_HUMAN   | -0.3117733 | 0.5692702  |
| sp P20702 ITAX_HUMAN    | -0.3112698 | 0.312067   |
| sp P09429 HMGB1_HUMAN   | -0.3111649 | 0.45033538 |
| sp Q13751 LAMB3_HUMAN   | -0.310051  | 0.6298893  |
| sp P62314 SMD1_HUMAN    | -0.3078966 | 0.7827403  |
| sp Q08722-2 CD47_HUMAN  | -0.3068657 | 0.7061832  |
| sp P11215-2 ITAM_HUMAN  | -0.3041248 | 0.90036625 |
| sp P05107 ITB2_HUMAN    | -0.3019733 | 1.1386513  |
| sp P16671-4 CD36_HUMAN  | -0.3005905 | 0.40256184 |
| sp P43304 GPDM_HUMAN    | -0.297081  | 0.5896263  |
| sp A5A3E0 POTEF_HUMAN   | -0.2957726 | 0          |
| sp P04066 FUCO_HUMAN    | -0.2945776 | 1.1932944  |
| sp P28676 GRAN_HUMAN    | -0.2920857 | 0.45563722 |
| sp P61421 VA0D1_HUMAN   | -0.2900829 | 0.19410844 |
| sp P30838 AL3A1_HUMAN   | -0.2880173 | 0.7827403  |
| sp Q9NZA1-2 CLIC5_HUMAN | -0.2822132 | 0.8059303  |
| sp Q9BXM0 PRAX_HUMAN    | -0.2804794 | 0          |
| sp Q53FA7 QORX_HUMAN    | -0.278616  | 0.19149946 |
| sp Q9NZN3 EHD3_HUMAN    | -0.2772903 | 0.09894868 |
| sp Q9HB40 RISC_HUMAN    | -0.2760563 | 1.1932944  |
| sp Q04941 PLP2_HUMAN    | -0.2739372 | 0          |
| sp P24557-2 THAS_HUMAN  | -0.2711182 | 0.45033538 |
| sp P26447 S10A4_HUMAN   | -0.2661018 | 0.09339783 |
| sp Q9UBR2 CATZ_HUMAN    | -0.265131  | 0          |
| sp P62714 PP2AB_HUMAN   | -0.2627335 | 0.656254   |
| sp P06702 S10A9_HUMAN   | -0.2596664 | 0.16077396 |
| sp P35241 RADI_HUMAN    | -0.2596378 | 0.6115017  |
| sp Q9H8H3 MET7A_HUMAN   | -0.2594223 | 0          |
| sp P67809 YBOX1_HUMAN   | -0.2561007 | 0.7827403  |
| sp Q03135-2 CAV1_HUMAN  | -0.2523365 | 0          |
| sp Q92522 H1X_HUMAN     | -0.2507172 | 0.45033538 |
| sp P11686-2 PSPC_HUMAN  | -0.2504635 | 0          |
| sp P23229-4 ITA6_HUMAN  | -0.2502422 | 0          |
| sp P20292 AL5AP_HUMAN   | -0.248766  | 1.1932944  |
| sp P17931 LEG3_HUMAN    | -0.247366  | 0.30372584 |
| sp Q92973-2 TNPO1_HUMAN | -0.2414017 | 0.5204253  |
| sp P26440 IVD_HUMAN     | -0.2414017 | 0.1342476  |
| sp P02462 CO4A1_HUMAN   | -0.2399168 | 1.0634323  |
| sp Q9H2U2-2 IPYR2_HUMAN | -0.2360859 | 0.19149946 |
| sp P10523 ARRS_HUMAN    | -0.2300301 | 0.656254   |
| sp O15296 LX15B_HUMAN   | -0.2268829 | 0          |
| sp P11279 LAMP1_HUMAN   | -0.2268791 | 1.1932944  |

|                           |            |            |
|---------------------------|------------|------------|
| sp Q9Y2Q5 LTOR2_HUMAN     | -0.2259483 | 0.45033538 |
| sp P11047 LAMC1_HUMAN     | -0.2249184 | 1.0584712  |
| sp Q9HDC9 APMAP_HUMAN     | -0.2246056 | 0.694615   |
| sp P05026-2 AT1B1_HUMAN   | -0.2236481 | 0.84879977 |
| sp P09622 DLDH_HUMAN      | -0.2200928 | 0.22362706 |
| sp P22894 MMP8_HUMAN      | -0.219595  | 0          |
| sp P12236 ADT3_HUMAN      | -0.219183  | 0.19149946 |
| sp P16284-3 PECA1_HUMAN   | -0.218401  | 1.1371965  |
| sp Q9BXP5-5 SRRT_HUMAN    | -0.2180214 | 0.40256184 |
| sp P40926 MDHM_HUMAN      | -0.2152767 | 1.0728569  |
| sp P49756 RBM25_HUMAN     | -0.2130871 | 0.45033538 |
| sp Q8TD06 AGR3_HUMAN      | -0.2119484 | 0          |
| sp P07099 HYEP_HUMAN      | -0.21064   | 0.8524118  |
| sp P21980 TGM2_HUMAN      | -0.2082539 | 0.7152521  |
| sp Q96AP7 ESAM_HUMAN      | -0.2065353 | 0          |
| sp P02750 A2GL_HUMAN      | -0.2042446 | 0.26737198 |
| sp Q96EE3-1 SEH1_HUMAN    | -0.2035618 | 0          |
| sp Q9Y2J2-4 E41L3_HUMAN   | -0.2031326 | 0          |
| sp O15230 LAMA5_HUMAN     | -0.2029724 | 0.7118947  |
| sp P01920 DQB1_HUMAN      | -0.2022743 | 0          |
| sp Q13488 VPP3_HUMAN      | -0.2021322 | 0.43633315 |
| sp P61960 UFM1_HUMAN      | -0.2006588 | 0.45033538 |
| sp P13686 PPA5_HUMAN      | -0.1991882 | 0.5204253  |
| sp P51659 DHB4_HUMAN      | -0.1984463 | 0.7588735  |
| sp O95837 GNA14_HUMAN     | -0.1980686 | 0          |
| sp P12429 ANXA3_HUMAN     | -0.1974239 | 0.01290371 |
| sp P55327-3 TPD52_HUMAN   | -0.1969528 | 0.5204253  |
| sp A0A0B4J2D5 GAL3B_HUMAN | -0.1959209 | 0.06291623 |
| sp Q9UBW8 CSN7A_HUMAN     | -0.1951809 | 0.09894868 |
| sp P30048-2 PRDX3_HUMAN   | -0.1935196 | 0.20467198 |
| sp P07355 ANXA2_HUMAN     | -0.1927452 | 0.01178462 |
| sp P43353-2 AL3B1_HUMAN   | -0.1915665 | 0          |
| sp P35914 HMGCL_HUMAN     | -0.189949  | 0.09894868 |
| sp Q96AG4 LRC59_HUMAN     | -0.1897831 | 1.1791906  |
| sp P40121 CAPG_HUMAN      | -0.1882629 | 0          |
| sp P00352 AL1A1_HUMAN     | -0.1872463 | 0.11367966 |
| sp P11310-2 ACADM_HUMAN   | -0.1862106 | 0.01551361 |
| sp Q04837 SSBP_HUMAN      | -0.185833  | 0.35795313 |
| sp P61106 RAB14_HUMAN     | -0.1851044 | 0.81595695 |
| sp P11717 MPRI_HUMAN      | -0.1840725 | 0.35795313 |
| sp P09668 CATH_HUMAN      | -0.183548  | 0.3005443  |
| sp P14780 MMP9_HUMAN      | -0.1835365 | 0.4075265  |
| sp P22307-8 NLTP_HUMAN    | -0.1817551 | 0.9533461  |
| sp P0CG47 UBB_HUMAN       | -0.1813164 | 0.95332193 |
| sp Q01130-2 SRSF2_HUMAN   | -0.1806221 | 0.7061832  |

|                           |            |            |
|---------------------------|------------|------------|
| sp P61604 CH10_HUMAN      | -0.1799355 | 0.40256184 |
| sp Q99715-4 COCA1_HUMAN   | -0.1790695 | 0.25789237 |
| sp Q99436 PSB7_HUMAN      | -0.1788321 | 0          |
| sp P20340-2 RAB6A_HUMAN   | -0.1760368 | 0          |
| sp Q9NVJ2 ARL8B_HUMAN     | -0.1760101 | 0          |
| sp P08236-2 BGLR_HUMAN    | -0.1732636 | 0.35193655 |
| sp O00159 MYO1C_HUMAN     | -0.1731663 | 0.82648736 |
| sp P07996 TSP1_HUMAN      | -0.1725655 | 0.65625405 |
| sp Q6NY19-2 KANK3_HUMAN   | -0.1715584 | 0.2178309  |
| sp P61026 RAB10_HUMAN     | -0.1710463 | 0          |
| sp Q99536 VAT1_HUMAN      | -0.1708355 | 0.21680334 |
| sp Q13813-2 SPTN1_HUMAN   | -0.1707592 | 0          |
| sp Q13555-7 KCC2G_HUMAN   | -0.1700821 | 0          |
| sp Q92820 GGH_HUMAN       | -0.1700258 | 0.45033538 |
| sp P05362 ICAM1_HUMAN     | -0.1684799 | 0.5818213  |
| sp Q13228-4 SBP1_HUMAN    | -0.1676388 | 0.306704   |
| sp P14543-2 NID1_HUMAN    | -0.1659756 | 0.3096179  |
| sp P09110 THIK_HUMAN      | -0.1651955 | 0.633381   |
| sp P63220 RS21_HUMAN      | -0.1641922 | 0          |
| sp Q15833-2 STXB2_HUMAN   | -0.1639099 | 0.09894868 |
| sp P42126-2 ECI1_HUMAN    | -0.1625214 | 0          |
| sp Q07955-2 SRSF1_HUMAN   | -0.1599922 | 1.0475321  |
| sp P04080 CYTB_HUMAN      | -0.159565  | 0          |
| sp P01903 DRA_HUMAN       | -0.1584892 | 0.4546338  |
| sp P30044 PRDX5_HUMAN     | -0.1575623 | 0.29762787 |
| sp P28074 PSB5_HUMAN      | -0.1566639 | 0          |
| sp P16435 NCPR_HUMAN      | -0.1558456 | 0.01044662 |
| sp O75695 XRP2_HUMAN      | -0.15555   | 0          |
| sp Q14254 FLOT2_HUMAN     | -0.1542568 | 0.2699497  |
| sp P33121-3 ACSL1_HUMAN   | -0.1540756 | 0.03367973 |
| sp Q9NYL9 TMOD3_HUMAN     | -0.1538582 | 0.4075265  |
| sp Q13813-3 SPTN1_HUMAN   | -0.1536636 | 0          |
| sp Q9GZM7-3 TINAL_HUMAN   | -0.1532898 | 0          |
| sp Q02252-2 MMSA_HUMAN    | -0.1532135 | 0.12054814 |
| sp O75131 CPNE3_HUMAN     | -0.1523438 | 0          |
| sp Q96TC7 RMD3_HUMAN      | -0.1517277 | 0.95332193 |
| sp P51149 RAB7A_HUMAN     | -0.1498852 | 0.1804695  |
| sp P30040 ERP29_HUMAN     | -0.14958   | 0.7740364  |
| sp A0A0B4J1X8 HV343_HUMAN | -0.1491127 | 0.656254   |
| sp P09960 LKHA4_HUMAN     | -0.14888   | 0.869505   |
| sp P27824-2 CALX_HUMAN    | -0.1483135 | 0.368128   |
| sp P62820 RAB1A_HUMAN     | -0.1478024 | 0          |
| sp P23634-2 AT2B4_HUMAN   | -0.1476955 | 0.03367973 |
| sp Q9H0U4 RAB1B_HUMAN     | -0.1468487 | 0.1342476  |
| sp P10599-2 THIO_HUMAN    | -0.1460133 | 0.1342476  |



|                         |            |            |
|-------------------------|------------|------------|
| sp P07910-2 HNRPC_HUMAN | -0.145998  | 0.7498006  |
| sp Q969H8 MYDGF_HUMAN   | -0.1453133 | 0.2178309  |
| sp P00403 COX2_HUMAN    | -0.1441727 | 0          |
| sp Q9Y3D6 FIS1_HUMAN    | -0.1434031 | 0.2178309  |
| sp Q8TC12-2 RDH11_HUMAN | -0.1429596 | 0          |
| sp P13804-2 ETFA_HUMAN  | -0.1427193 | 0          |
| sp P35754 GLRX1_HUMAN   | -0.1425228 | 0          |
| sp P06737-2 PYGL_HUMAN  | -0.1413193 | 0.19818917 |
| sp O00186 STXB3_HUMAN   | -0.1412916 | 0          |
| sp P16278-2 BGAL_HUMAN  | -0.1403198 | 0.35795313 |
| sp O75390 CISY_HUMAN    | -0.1394444 | 0.05621411 |
| sp O94760 DDAH1_HUMAN   | -0.1385021 | 0          |
| sp Q00839 HNRPU_HUMAN   | -0.1378307 | 0.45033535 |
| sp P01009 A1AT_HUMAN    | -0.1371861 | 0.09165865 |
| sp Q13636 RAB31_HUMAN   | -0.1358948 | 0.09894868 |
| sp P15144 AMPN_HUMAN    | -0.1350517 | 0.45563722 |
| sp Q13011 ECH1_HUMAN    | -0.1345844 | 0.4075265  |
| sp P49748-2 ACADV_HUMAN | -0.133915  | 0.04487669 |
| sp P29401-2 TKT_HUMAN   | -0.1338005 | 0.01727676 |
| sp O75348 VATG1_HUMAN   | -0.1326294 | 0          |
| sp O14786 NRP1_HUMAN    | -0.1320419 | 0          |
| sp Q09666 AHNK_HUMAN    | -0.131897  | 0.5848035  |
| sp P06748-3 NPM_HUMAN   | -0.1310711 | 0          |
| sp P52790 HXK3_HUMAN    | -0.1309929 | 0          |
| sp P41250 GARS_HUMAN    | -0.1306114 | 0.12054814 |
| sp P53992 SC24C_HUMAN   | -0.1282024 | 0.26737198 |
| sp O43760-2 SNG2_HUMAN  | -0.1273441 | 0          |
| sp P61019 RAB2A_HUMAN   | -0.1237545 | 0          |
| sp P42167-2 LAP2B_HUMAN | -0.1233902 | 0.6509351  |
| sp P62873 GBB1_HUMAN    | -0.1232948 | 0          |
| sp O00391 QSOX1_HUMAN   | -0.1225529 | 0          |
| sp Q16698-2 DECR_HUMAN  | -0.1224766 | 0.34244674 |
| sp P54802 ANAG_HUMAN    | -0.1218462 | 0.2178309  |
| sp Q9H0R4 HDHD2_HUMAN   | -0.1207686 | 0          |
| sp Q9ULV4-3 COR1C_HUMAN | -0.1199436 | 0          |
| sp P09601 HMOX1_HUMAN   | -0.1197605 | 0.04707252 |
| sp P00505 AATM_HUMAN    | -0.1197109 | 0.15517515 |
| sp P61225 RAP2B_HUMAN   | -0.11936   | 0          |
| sp Q16853 AOC3_HUMAN    | -0.1190605 | 0.13882811 |
| sp P38606-2 VATA_HUMAN  | -0.1183853 | 0.08684197 |
| sp P05556 ITB1_HUMAN    | -0.1175995 | 0.56076217 |
| sp P10515 ODP2_HUMAN    | -0.1169262 | 0.02662771 |
| sp Q14165 MLEC_HUMAN    | -0.1160774 | 0.35795313 |
| sp P09619 PGFRB_HUMAN   | -0.1150608 | 0.40256184 |
| sp P36543-2 VATE1_HUMAN | -0.1132469 | 0.2178309  |

|                         |            |            |
|-------------------------|------------|------------|
| sp P17655 CAN2_HUMAN    | -0.1122952 | 0.44116515 |
| sp P52209-2 6PGD_HUMAN  | -0.1107845 | 0.20449738 |
| sp Q16630-3 CPSF6_HUMAN | -0.1104717 | 0.35795313 |
| sp P53041 PPP5_HUMAN    | -0.1104603 | 0.06842031 |
| sp P60953 CDC42_HUMAN   | -0.1094742 | 0          |
| sp O00468-7 AGRIN_HUMAN | -0.1092157 | 0          |
| sp O15143 ARC1B_HUMAN   | -0.1088924 | 0          |
| sp Q07507 DERM_HUMAN    | -0.1086731 | 0.34137914 |
| sp Q10567-2 AP1B1_HUMAN | -0.1073608 | 0.06291623 |
| sp P23786 CPT2_HUMAN    | -0.1063919 | 0.0846519  |
| sp Q15907 RB11B_HUMAN   | -0.1063881 | 0.2207585  |
| sp Q9HAV0 GBB4_HUMAN    | -0.1058464 | 0          |
| sp P0DP25 CALM3_HUMAN   | -0.1058311 | 0.06842031 |
| sp Q01105-2 SET_HUMAN   | -0.1056252 | 0.09894868 |
| sp O15400-2 STX7_HUMAN  | -0.1048622 | 0.25789237 |
| sp O15247 CLIC2_HUMAN   | -0.1047096 | 0.03367973 |
| sp P13987-2 CD59_HUMAN  | -0.1044598 | 0          |
| sp P12109 CO6A1_HUMAN   | -0.1042366 | 1.0589138  |
| sp P04004 VTNC_HUMAN    | -0.1040764 | 0.04454162 |
| sp P27487 DPP4_HUMAN    | -0.1040535 | 0.28516325 |
| sp P62995-3 TRA2B_HUMAN | -0.1039429 | 0.19149946 |
| sp Q9UBQ0-2 VPS29_HUMAN | -0.1037617 | 0          |
| sp P35579 MYH9_HUMAN    | -0.1037426 | 0.6473716  |
| sp P06733 ENOA_HUMAN    | -0.1030598 | 0.00699881 |
| sp P10809 CH60_HUMAN    | -0.102562  | 0.00415907 |
| sp P62070-4 RRAS2_HUMAN | -0.1022739 | 0          |
| sp P25325-2 THTM_HUMAN  | -0.1016769 | 0          |
| sp Q8WWI1-5 LMO7_HUMAN  | -0.1013374 | 0.29066643 |
| sp P50440-3 GATM_HUMAN  | -0.0997219 | 0.19149946 |
| sp P50452 SPB8_HUMAN    | -0.0982819 | 0.19149946 |
| sp Q9NRN5 OLFL3_HUMAN   | -0.0978012 | 0.10017801 |
| sp Q9Y2X3 NOP58_HUMAN   | -0.0977135 | 0.19149946 |
| sp P37837 TALDO_HUMAN   | -0.0977097 | 0.01700861 |
| sp O95831-3 AIFM1_HUMAN | -0.0972366 | 0          |
| sp Q9HCC0-2 MCCB_HUMAN  | -0.0971584 | 0          |
| sp P68036-3 UB2L3_HUMAN | -0.0969391 | 0          |
| sp Q02318 CP27A_HUMAN   | -0.0964985 | 0          |
| sp Q53H82 LACB2_HUMAN   | -0.096426  | 0          |
| sp P04440 DPB1_HUMAN    | -0.0957661 | 0          |
| sp P00338 LDHA_HUMAN    | -0.0953922 | 0.00697919 |
| sp O75955-2 FLOT1_HUMAN | -0.095089  | 0          |
| sp Q9BWD1 THIC_HUMAN    | -0.0949154 | 0          |
| sp Q99598 TSNAX_HUMAN   | -0.0945139 | 0.09894868 |
| sp Q92542 NICA_HUMAN    | -0.0935097 | 0.09894868 |
| sp Q8IWB7 WDFY1_HUMAN   | -0.0915222 | 0          |

|                          |            |            |
|--------------------------|------------|------------|
| sp P05141 ADT2_HUMAN     | -0.0896912 | 0.26737198 |
| sp P49591 SYSC_HUMAN     | -0.0893822 | 0.09851671 |
| sp P61088 UBE2N_HUMAN    | -0.0886612 | 0          |
| sp P01871-2 IGHM_HUMAN   | -0.0885735 | 0          |
| sp Q9HD89 RETN_HUMAN     | -0.0883827 | 0.45033538 |
| sp Q9Y2A7-2 NCKP1_HUMAN  | -0.0880928 | 0          |
| sp Q03135 CAV1_HUMAN     | -0.0877075 | 0          |
| sp Q15582 BGH3_HUMAN     | -0.0876236 | 0.18948217 |
| sp P13796 PLSL_HUMAN     | -0.0873718 | 0.30111516 |
| sp P20774 MIME_HUMAN     | -0.0870686 | 0.04454162 |
| sp P08575-10 PTPRC_HUMAN | -0.0869026 | 0.16702904 |
| sp P21912 SDHB_HUMAN     | -0.0867672 | 0.09894868 |
| sp P22897 MRC1_HUMAN     | -0.086525  | 0.49008074 |
| sp Q6UWY5 OLFL1_HUMAN    | -0.0862637 | 0.6255959  |
| sp O94832 MYO1D_HUMAN    | -0.0861588 | 0          |
| sp Q92552-2 RT27_HUMAN   | -0.0859299 | 0          |
| sp P60033 CD81_HUMAN     | -0.0857048 | 0          |
| sp Q14344 GNA13_HUMAN    | -0.085331  | 0.06291623 |
| sp O60437 PEPL_HUMAN     | -0.084507  | 0.10950502 |
| sp Q9BRF8 CPPED_HUMAN    | -0.083683  | 0          |
| sp P34896-2 GLYC_HUMAN   | -0.0836372 | 0.06291623 |
| sp Q3KQV9 UAP1L_HUMAN    | -0.0831947 | 0.45033538 |
| sp Q14533 KRT81_HUMAN    | -0.0829735 | 0          |
| sp Q13451 FKBP5_HUMAN    | -0.0827141 | 0          |
| sp Q5JWF2-2 GNAS1_HUMAN  | -0.0825138 | 0.09339783 |
| sp Q13496 MTM1_HUMAN     | -0.0823851 | 0.19149946 |
| sp Q9H0W9-2 CK054_HUMAN  | -0.0819626 | 0          |
| sp O75439 MPPB_HUMAN     | -0.0815945 | 0.28516325 |
| sp Q9UKV3-5 ACINU_HUMAN  | -0.0801353 | 0.40256184 |
| sp A6NMZ7 CO6A6_HUMAN    | -0.0799179 | 0.37277833 |
| sp P30740 ILEU_HUMAN     | -0.0782814 | 0          |
| sp P24752 THIL_HUMAN     | -0.0778885 | 0.31423286 |
| sp Q15149-9 PLEC_HUMAN   | -0.0775204 | 0          |
| sp P84090 ERH_HUMAN      | -0.0771618 | 0          |
| sp P36551 HEM6_HUMAN     | -0.0764732 | 0          |
| sp Q00169 PIPNA_HUMAN    | -0.0761051 | 0          |
| sp P08572 CO4A2_HUMAN    | -0.0752525 | 0.26737198 |
| sp P31040 SDHA_HUMAN     | -0.0752449 | 0.09851671 |
| sp P04075 ALDOA_HUMAN    | -0.0750008 | 0.17235917 |
| sp P62258 1433E_HUMAN    | -0.0746002 | 0.19959533 |
| sp P21397 AOFA_HUMAN     | -0.0743008 | 0          |
| sp Q9NZM1-3 MYOF_HUMAN   | -0.0740051 | 0          |
| sp P15170-2 ERF3A_HUMAN  | -0.072731  | 0          |
| sp P98160 PGBM_HUMAN     | -0.0722332 | 0.19525568 |
| sp Q08380 LG3BP_HUMAN    | -0.0722008 | 0.74639726 |

|                         |            |            |
|-------------------------|------------|------------|
| sp P51648-2 AL3A2_HUMAN | -0.0721149 | 0.04454162 |
| sp Q16658 FSCN1_HUMAN   | -0.0719204 | 0.02114108 |
| sp P30626-2 SORCN_HUMAN | -0.0703297 | 0          |
| sp Q9ULA0 DNPEP_HUMAN   | -0.0700417 | 0.56808305 |
| sp Q7Z6Z7-2 HUWE1_HUMAN | -0.0695915 | 0          |
| sp P21281 VATB2_HUMAN   | -0.0694923 | 0.04817784 |
| sp Q04760-2 LGUL_HUMAN  | -0.0692368 | 0          |
| sp P51148-2 RAB5C_HUMAN | -0.0690575 | 0.04454162 |
| sp P20700 LMNB1_HUMAN   | -0.0686913 | 0.6666559  |
| sp Q9Y5S9-2 RBM8A_HUMAN | -0.0685825 | 0.09894868 |
| sp O94811 TPPP_HUMAN    | -0.0684357 | 0          |
| sp P31323 KAP3_HUMAN    | -0.0681038 | 0.312067   |
| sp P06753 TPM3_HUMAN    | -0.0680828 | 0          |
| sp Q9NTX5-3 ECHD1_HUMAN | -0.0670776 | 0          |
| sp P55263 ADK_HUMAN     | -0.0668936 | 0          |
| sp P30084 ECHM_HUMAN    | -0.0665455 | 0          |
| sp Q13217 DNJC3_HUMAN   | -0.06633   | 0.17319627 |
| sp P38646 GRP75_HUMAN   | -0.0647202 | 0.18005672 |
| sp Q96P70 IPO9_HUMAN    | -0.0646896 | 0          |
| sp P12110 CO6A2_HUMAN   | -0.0641747 | 0.02228302 |
| sp Q8NFW8 NEUA_HUMAN    | -0.0640183 | 0          |
| sp P50148 GNAQ_HUMAN    | -0.0639076 | 0.06291623 |
| sp P09382 LEG1_HUMAN    | -0.0635986 | 0.16702904 |
| sp Q9Y394-2 DHRS7_HUMAN | -0.0634041 | 0          |
| sp O75923-15 DYSF_HUMAN | -0.0626011 | 0          |
| sp P61158 ARP3_HUMAN    | -0.0624542 | 0.11648214 |
| sp O43175 SERA_HUMAN    | -0.0621948 | 0.08077049 |
| sp P02743 SAMP_HUMAN    | -0.0620651 | 0          |
| sp P13489 RINI_HUMAN    | -0.0619679 | 0.1007388  |
| sp P37802 TAGL2_HUMAN   | -0.0618477 | 0          |
| sp Q06830 PRDX1_HUMAN   | -0.0618248 | 0          |
| sp O75643 U520_HUMAN    | -0.0615997 | 0          |
| sp P09871 C1S_HUMAN     | -0.0613422 | 0.30372584 |
| sp P63167 DYL1_HUMAN    | -0.0612755 | 0          |
| sp Q9NSE4 SYIM_HUMAN    | -0.061142  | 0.16214149 |
| sp P00387-3 NB5R3_HUMAN | -0.0607147 | 0          |
| sp P78417 GSTO1_HUMAN   | -0.0603256 | 0.04153777 |
| sp P02545 LMNA_HUMAN    | -0.0602779 | 0.01551361 |
| sp P51636-2 CAV2_HUMAN  | -0.0601501 | 0.19149946 |
| sp P11216 PYGB_HUMAN    | -0.0597534 | 0.50252277 |
| sp Q15084-5 PDIA6_HUMAN | -0.0592365 | 0.15332921 |
| sp Q07157 ZO1_HUMAN     | -0.0591297 | 0.46260658 |
| sp Q96S97 MYADM_HUMAN   | -0.0590744 | 0          |
| sp Q01082 SPTB2_HUMAN   | -0.0584106 | 0.21964629 |
| sp P61586 RHOA_HUMAN    | -0.0582533 | 0.09894868 |

|                         |            |            |
|-------------------------|------------|------------|
| sp P06396-2 GELS_HUMAN  | -0.057045  | 0          |
| sp P55072 TERA_HUMAN    | -0.0570164 | 0.06431034 |
| sp P24666-2 PPAC_HUMAN  | -0.0566854 | 0          |
| sp Q92597 NDRG1_HUMAN   | -0.0564308 | 0.06291623 |
| sp P63104 1433Z_HUMAN   | -0.0563698 | 0.2909411  |
| sp Q9NV96-3 CC50A_HUMAN | -0.0556564 | 0          |
| sp P21964-2 COMT_HUMAN  | -0.0547447 | 0          |
| sp P11678 PERE_HUMAN    | -0.0543556 | 0          |
| sp P30519 HMOX2_HUMAN   | -0.0538006 | 0.06291623 |
| sp P50213 IDH3A_HUMAN   | -0.0533485 | 0          |
| sp P23141-3 EST1_HUMAN  | -0.0532227 | 0.37313595 |
| sp P54920 SNAA_HUMAN    | -0.0528355 | 0          |
| sp Q9UUK9 NUDT5_HUMAN   | -0.052618  | 0          |
| sp P08648 ITA5_HUMAN    | -0.0525246 | 0          |
| sp Q14112-2 NID2_HUMAN  | -0.0525169 | 0.34137914 |
| sp Q6NZI2 CAVN1_HUMAN   | -0.0523338 | 0.09139413 |
| sp P31948 STIP1_HUMAN   | -0.0521946 | 0          |
| sp Q07954 LRP1_HUMAN    | -0.0520191 | 0.12618111 |
| sp Q10589-2 BST2_HUMAN  | -0.0513134 | 0          |
| sp O95373 IPO7_HUMAN    | -0.050518  | 0          |
| sp P05166-2 PCCB_HUMAN  | -0.0504761 | 0.01343579 |
| sp P27797 CALR_HUMAN    | -0.0498962 | 0.16702904 |
| sp P07948-2 LYN_HUMAN   | -0.0498924 | 0          |
| sp P45880-2 VDAC2_HUMAN | -0.0497055 | 0          |
| sp P28070 PSB4_HUMAN    | -0.0493889 | 0.14672586 |
| sp Q86X76-2 NIT1_HUMAN  | -0.0492573 | 0          |
| sp Q16363-2 LAMA4_HUMAN | -0.0486145 | 0.01178462 |
| sp P13639 EF2_HUMAN     | -0.0482101 | 0.00226418 |
| sp O95202 LETM1_HUMAN   | -0.0474777 | 0.25789237 |
| sp P67775-2 PP2AA_HUMAN | -0.04739   | 0          |
| sp Q14651 PLSI_HUMAN    | -0.0465183 | 0          |
| sp Q13126-2 MTAP_HUMAN  | -0.0465031 | 0          |
| sp Q6YN16 HSDL2_HUMAN   | -0.046442  | 0.05483269 |
| sp O43148-2 MCES_HUMAN  | -0.0460644 | 0          |
| sp Q9BUJ2-4 HNRL1_HUMAN | -0.0459309 | 0          |
| sp Q6P1N9 TATD1_HUMAN   | -0.0459042 | 0          |
| sp Q14240-2 IF4A2_HUMAN | -0.0456944 | 0.21439649 |
| sp P55010 IF5_HUMAN     | -0.0451126 | 0          |
| sp Q6P587-3 FAHD1_HUMAN | -0.0450954 | 0          |
| sp P47985 UCRI_HUMAN    | -0.0450745 | 0.35795313 |
| sp O75947-2 ATP5H_HUMAN | -0.0446911 | 0.04454162 |
| sp Q96N66-3 MBOA7_HUMAN | -0.0420036 | 0          |
| sp P14625 ENPL_HUMAN    | -0.0410385 | 0.40633747 |
| sp Q709C8-2 VP13C_HUMAN | -0.040535  | 0          |
| sp Q04826 1B40_HUMAN    | -0.0403748 | 0          |

|                         |            |            |
|-------------------------|------------|------------|
| sp P52788 SPSY_HUMAN    | -0.0387383 | 0.7061832  |
| sp Q15029-2 U5S1_HUMAN  | -0.0383949 | 0.1159057  |
| sp Q8TAT6-2 NPL4_HUMAN  | -0.0383291 | 0          |
| sp P04406 G3P_HUMAN     | -0.0376205 | 0.05919517 |
| sp P29218 IMPA1_HUMAN   | -0.0374184 | 0.14672586 |
| sp Q13938-4 CAYP1_HUMAN | -0.0371094 | 0          |
| sp P06744 G6PI_HUMAN    | -0.0367031 | 0          |
| sp Q02218-2 ODO1_HUMAN  | -0.0366545 | 0          |
| sp P42765 THIM_HUMAN    | -0.0365047 | 0.09124502 |
| sp P39060-1 COIA1_HUMAN | -0.0362549 | 0.1063047  |
| sp O43813 LANC1_HUMAN   | -0.0358181 | 0          |
| sp P51991 ROA3_HUMAN    | -0.0355682 | 0          |
| sp P01780 HV307_HUMAN   | -0.034977  | 0          |
| sp P84077 ARF1_HUMAN    | -0.0345726 | 0.06291623 |
| sp Q99829 CPNE1_HUMAN   | -0.0344753 | 0          |
| sp Q6P179 ERAP2_HUMAN   | -0.0344505 | 0          |
| sp Q13043 STK4_HUMAN    | -0.0336437 | 0          |
| sp O60825-2 F262_HUMAN  | -0.0335293 | 0          |
| sp P12830 CADH1_HUMAN   | -0.0333481 | 0          |
| sp Q8IV08 PLD3_HUMAN    | -0.0332432 | 0.26737198 |
| sp Q32MZ4-3 LRRF1_HUMAN | -0.0322456 | 0          |
| sp P61981 1433G_HUMAN   | -0.0321674 | 0          |
| sp P49407-2 ARRB1_HUMAN | -0.032156  | 0          |
| sp P53634 CATC_HUMAN    | -0.0319462 | 0.06291623 |
| sp P62879 GBB2_HUMAN    | -0.031168  | 0          |
| sp Q8N335 GPD1L_HUMAN   | -0.0308933 | 0.30372584 |
| sp P39687 AN32A_HUMAN   | -0.0296268 | 0          |
| sp P21796 VDAC1_HUMAN   | -0.0288467 | 0          |
| sp Q86Y82 STX12_HUMAN   | -0.0287571 | 0          |
| sp P25685-2 DNJB1_HUMAN | -0.0285034 | 0          |
| sp Q15599-2 NHRF2_HUMAN | -0.0283756 | 0          |
| sp P60228 EIF3E_HUMAN   | -0.0282784 | 0.30372584 |
| sp Q5T440 CAF17_HUMAN   | -0.0280495 | 0          |
| sp Q13308-6 PTK7_HUMAN  | -0.0278797 | 0.2207585  |
| sp Q96I99 SUCB2_HUMAN   | -0.0275784 | 0          |
| sp P22626 ROA2_HUMAN    | -0.0273552 | 0.02575658 |
| sp Q03252 LMNB2_HUMAN   | -0.0272121 | 0.23348935 |
| sp Q14108-2 SCRB2_HUMAN | -0.0271034 | 0          |
| sp Q08211 DHX9_HUMAN    | -0.0269127 | 0.02421166 |
| sp Q6NUK1-2 SCMC1_HUMAN | -0.0264111 | 0.04454162 |
| sp P11021 BIP_HUMAN     | -0.0259285 | 0.00246678 |
| sp Q9UDY2-3 ZO2_HUMAN   | -0.0249672 | 0.356152   |
| sp Q8WXF1 PSPC1_HUMAN   | -0.0247688 | 0          |
| sp O75521-2 ECI2_HUMAN  | -0.0243588 | 0          |
| sp P49458 SRP09_HUMAN   | -0.0238876 | 0          |

|                         |            |            |
|-------------------------|------------|------------|
| sp Q03154-4 ACY1_HUMAN  | -0.0236797 | 0          |
| sp Q9HB07 MYG1_HUMAN    | -0.0231934 | 0          |
| sp P49755 TMEDA_HUMAN   | -0.0228252 | 0          |
| sp P63261 ACTG_HUMAN    | -0.0224628 | 0          |
| sp P16219 ACADS_HUMAN   | -0.0220871 | 0.06291623 |
| sp O94919 ENDD1_HUMAN   | -0.0220394 | 0.06291623 |
| sp Q12905 ILF2_HUMAN    | -0.0220013 | 0          |
| sp P0COL4 CO4A_HUMAN    | -0.0219994 | 0          |
| sp P17174 AATC_HUMAN    | -0.0219307 | 0.02174174 |
| sp Q12931-2 TRAP1_HUMAN | -0.0215836 | 0          |
| sp Q00325-2 MPCP_HUMAN  | -0.0211639 | 0.26737198 |
| sp Q53GQ0 DHB12_HUMAN   | -0.0210953 | 0          |
| sp Q5EBM0-3 CMPK2_HUMAN | -0.020834  | 0.09894868 |
| sp P19367-3 H XK1_HUMAN | -0.0207596 | 0.01100408 |
| sp P14618-3 KP YM_HUMAN | -0.0205765 | 0          |
| sp P49189 AL9A1_HUMAN   | -0.0204849 | 0          |
| sp Q15121 PEA15_HUMAN   | -0.0194016 | 0.09894868 |
| sp Q9BVG4 PBDC1_HUMAN   | -0.019043  | 0          |
| sp P00367 DHE3_HUMAN    | -0.0188484 | 0.01551361 |
| sp P06899 H2B1J_HUMAN   | -0.0186653 | 0          |
| sp P60983 GMFB_HUMAN    | -0.0184937 | 0          |
| sp P49065 ALBU_RABIT    | -0.018362  | 0          |
| sp P60660-2 MYL6_HUMAN  | -0.0178776 | 0          |
| sp Q15369-2 ELOC_HUMAN  | -0.0178604 | 0          |
| sp P07942 LAMB1_HUMAN   | -0.0168514 | 0.19852771 |
| sp P78347-2 GTF2I_HUMAN | -0.0167751 | 0.19149946 |
| sp P61601 NCALD_HUMAN   | -0.0160408 | 0          |
| sp P26641 EF1G_HUMAN    | -0.0159149 | 0.18378536 |
| sp O60234 GMFG_HUMAN    | -0.0152721 | 0.04454162 |
| sp Q9Y315 DEOC_HUMAN    | -0.015029  | 0          |
| sp P09543-2 CN37_HUMAN  | -0.0150108 | 0.09750395 |
| sp P84243 H33_HUMAN     | -0.0147266 | 0.2178309  |
| sp Q9UJ70-2 NAGK_HUMAN  | -0.0146255 | 0          |
| sp Q9BS26 ERP44_HUMAN   | -0.014389  | 0          |
| sp Q15836 VAMP3_HUMAN   | -0.013237  | 0          |
| sp O95571 ETHE1_HUMAN   | -0.0127563 | 0.26546443 |
| sp Q9UI12-2 VATH_HUMAN  | -0.0127296 | 0.11949348 |
| sp P51649-2 SSDH_HUMAN  | -0.0123329 | 0.09750395 |
| sp P62993 GRB2_HUMAN    | -0.0122833 | 0          |
| sp Q9NYU2-2 UGGG1_HUMAN | -0.0121841 | 0.02858656 |
| sp Q92598-2 HS105_HUMAN | -0.0115299 | 0          |
| sp P23246 SFPQ_HUMAN    | -0.0110989 | 0          |
| sp P22234-2 PUR6_HUMAN  | -0.0109787 | 0          |
| sp P55196-5 AFAD_HUMAN  | -0.0109177 | 0          |
| sp Q8NBJ5 GT251_HUMAN   | -0.0108986 | 0.1558116  |

|                         |            |            |
|-------------------------|------------|------------|
| sp P09211 GSTP1_HUMAN   | -0.0108585 | 0          |
| sp P27105 STOM_HUMAN    | -0.0107918 | 0.13973783 |
| sp Q9Y277-2 VDAC3_HUMAN | -0.010498  | 0          |
| sp P12270 TPR_HUMAN     | -0.0103874 | 0          |
| sp P63151-2 2ABA_HUMAN  | -0.0100594 | 0          |
| sp Q9UL25 RAB21_HUMAN   | -0.0096455 | 0.06291623 |
| sp Q16629-4 SRSF7_HUMAN | -0.0093174 | 0          |
| sp Q9NZ01 TECR_HUMAN    | -0.0092688 | 0          |
| sp P30085 KCY_HUMAN     | -0.0092335 | 0          |
| sp Q96BM9 ARL8A_HUMAN   | -0.0091305 | 0          |
| sp P04350 TBB4A_HUMAN   | -0.0089035 | 0          |
| sp Q9P265 DIP2B_HUMAN   | -0.0087757 | 0          |
| sp P48643 TCPE_HUMAN    | -0.0087528 | 0.11004404 |
| sp P16070-16 CD44_HUMAN | -0.008606  | 0          |
| sp P62937 PPIA_HUMAN    | -0.0083885 | 0          |
| sp Q8NBJ7 SUMF2_HUMAN   | -0.0081024 | 0          |
| sp O95197-2 RTN3_HUMAN  | -0.0070229 | 0          |
| sp Q96KP4 CNDP2_HUMAN   | -0.0067081 | 0          |
| sp Q5K4L6-2 S27A3_HUMAN | -0.0065098 | 0          |
| sp P06576 ATPB_HUMAN    | -0.0063133 | 0.05779712 |
| sp Q16762 THTR_HUMAN    | -0.0057831 | 0          |
| sp O00264 PGRC1_HUMAN   | -0.0050354 | 0          |
| sp P35221 CTNA1_HUMAN   | -0.0046501 | 0.2237808  |
| sp P26368-2 U2AF2_HUMAN | -0.0044727 | 0          |
| sp P48449-3 ERG7_HUMAN  | -0.004406  | 0.09339783 |
| sp Q02818 NUCB1_HUMAN   | -0.0042934 | 0.16293353 |
| sp Q96FV2-2 SCRN2_HUMAN | -0.0037746 | 0          |
| sp P34897-3 GLYM_HUMAN  | -0.0034027 | 0          |
| sp P05452 TETN_HUMAN    | -0.0032272 | 0.09894868 |
| sp P25787 PSA2_HUMAN    | -0.0030937 | 0.20467198 |
| sp P14207 FOLR2_HUMAN   | -0.0029993 | 0          |
| sp O75608-2 LYPA1_HUMAN | -0.0020676 | 0          |
| sp Q86UP2-4 KTN1_HUMAN  | -0.0019856 | 0          |
| sp P63027 VAMP2_HUMAN   | -0.0019302 | 0          |
| sp Q02083-2 NAAA_HUMAN  | -0.0015221 | 0          |
| sp O00423-3 EMAL1_HUMAN | -0.0013332 | 0.09894868 |
| sp O94826 TOM70_HUMAN   | -0.0012903 | 0.11949348 |
| sp P98095-2 FBLN2_HUMAN | -0.0011559 | 0.12026574 |
| sp Q96HD1-2 CREL1_HUMAN | -0.0011292 | 0          |
| sp P48960-2 CD97_HUMAN  | -7.46E-04  | 0          |
| sp P33316 DUT_HUMAN     | -1.72E-04  | 0          |
| sp P23142 FBLN1_HUMAN   | 0.00154495 | 0          |
| sp Q9Y2B0 CNPY2_HUMAN   | 0.0015564  | 0          |
| sp P61081 UBC12_HUMAN   | 0.00163078 | 0          |
| sp P56537 IF6_HUMAN     | 0.00174713 | 0.5111962  |



|                          |            |            |
|--------------------------|------------|------------|
| sp P22033 MUTA_HUMAN     | 0.00255966 | 0          |
| sp P36957 ODO2_HUMAN     | 0.00260735 | 0          |
| sp O60701 UGDH_HUMAN     | 0.00270462 | 0          |
| sp P10768 ESTD_HUMAN     | 0.00285149 | 0          |
| sp Q15661 TRYB1_HUMAN    | 0.003582   | 0          |
| sp O94973-2 AP2A2_HUMAN  | 0.00362206 | 0          |
| sp Q9NX46 ARHL2_HUMAN    | 0.00428391 | 0          |
| sp P29590 PML_HUMAN      | 0.00470924 | 0          |
| sp Q9H008 LHPP_HUMAN     | 0.00517082 | 0          |
| sp Q14697 GANAB_HUMAN    | 0.00540924 | 0          |
| sp Q92734-2 TFG_HUMAN    | 0.00577354 | 0          |
| sp Q13557-10 KCC2D_HUMAN | 0.00579071 | 0          |
| sp Q9Y6E0 STK24_HUMAN    | 0.00579071 | 0.19149946 |
| sp P16615 AT2A2_HUMAN    | 0.00582886 | 0          |
| sp P35606-2 COPB2_HUMAN  | 0.00583649 | 0          |
| sp O43776 SYNC_HUMAN     | 0.00604439 | 0          |
| sp P25398 RS12_HUMAN     | 0.00634289 | 0          |
| sp O43684-2 BUB3_HUMAN   | 0.00646973 | 0          |
| sp P43034 LIS1_HUMAN     | 0.00681686 | 0          |
| sp P09651-3 ROA1_HUMAN   | 0.00699043 | 0          |
| sp Q96HE7 ERO1A_HUMAN    | 0.00708199 | 0.09894868 |
| sp P49327 FAS_HUMAN      | 0.00709724 | 0.01335202 |
| sp P80303-2 NUCB2_HUMAN  | 0.00715446 | 0          |
| sp P00488 F13A_HUMAN     | 0.00724411 | 0.02575658 |
| sp Q7Z4W1 DCXR_HUMAN     | 0.00785637 | 0          |
| sp P50995-2 ANX11_HUMAN  | 0.00831223 | 0.22817776 |
| sp O15031 PLXB2_HUMAN    | 0.00862122 | 0.4075265  |
| sp Q9BTZ2 DHRS4_HUMAN    | 0.00865555 | 0          |
| sp P00390-2 GSHR_HUMAN   | 0.00939941 | 0          |
| sp P35237 SPB6_HUMAN     | 0.00954056 | 0          |
| sp P51572-2 BAP31_HUMAN  | 0.01036835 | 0          |
| sp Q96EP5-2 DAZP1_HUMAN  | 0.0105629  | 0          |
| sp Q16539-2 MK14_HUMAN   | 0.01104546 | 0          |
| sp P41091 IF2G_HUMAN     | 0.01114464 | 0.09339783 |
| sp Q9H8L6 MMRN2_HUMAN    | 0.01131821 | 0.312067   |
| sp O94788-4 AL1A2_HUMAN  | 0.01198196 | 0          |
| sp Q9NUJ1 ABHDA_HUMAN    | 0.01257324 | 0          |
| sp Q04206-3 TF65_HUMAN   | 0.01298714 | 0.19149946 |
| sp O75369-2 FLNB_HUMAN   | 0.0134182  | 0.0538261  |
| sp O15144 ARPC2_HUMAN    | 0.01389313 | 0.05681695 |
| sp Q9BTW9-4 TBCD_HUMAN   | 0.01407242 | 0.2178309  |
| sp Q8NBX0 SCPDL_HUMAN    | 0.0144043  | 0          |
| sp P62318-2 SMD3_HUMAN   | 0.01449776 | 0          |
| sp Q86VP6 CAND1_HUMAN    | 0.01451111 | 0          |
| sp P50579-2 MAP2_HUMAN   | 0.01451874 | 0          |

|                         |            |            |
|-------------------------|------------|------------|
| sp Q9ULC5-3 ACSL5_HUMAN | 0.01470566 | 0          |
| sp P55735 SEC13_HUMAN   | 0.01507378 | 0          |
| sp Q6P2Q9 PRP8_HUMAN    | 0.01509094 | 0          |
| sp P19338 NUCL_HUMAN    | 0.01518059 | 0.00590555 |
| sp P62316 SMD2_HUMAN    | 0.01535797 | 0          |
| sp P07737 PROF1_HUMAN   | 0.01581955 | 0          |
| sp P46926 GNPI1_HUMAN   | 0.01594925 | 0          |
| sp O60547-2 GMDS_HUMAN  | 0.01601028 | 0          |
| sp Q8WUY1 THEM6_HUMAN   | 0.01642609 | 0          |
| sp Q15637-3 SF01_HUMAN  | 0.01646805 | 0          |
| sp P24539 AT5F1_HUMAN   | 0.01701355 | 0.03367973 |
| sp Q13185 CBX3_HUMAN    | 0.01710701 | 0          |
| sp Q96RQ3 MCCA_HUMAN    | 0.01753998 | 0          |
| sp P60174 TPIS_HUMAN    | 0.01762962 | 0.01290371 |
| sp P10155-3 RO60_HUMAN  | 0.01767159 | 0.02662771 |
| sp P21399 ACOC_HUMAN    | 0.01779175 | 0          |
| sp Q15393 SF3B3_HUMAN   | 0.01794434 | 0.01178462 |
| sp P50990 TCPQ_HUMAN    | 0.01804733 | 0.02720552 |
| sp O95352 ATG7_HUMAN    | 0.01822853 | 0          |
| sp Q06787-10 FMR1_HUMAN | 0.01872444 | 0          |
| sp Q9NY33 DPP3_HUMAN    | 0.01911354 | 0.08684197 |
| sp O15382 BCAT2_HUMAN   | 0.01915932 | 0          |
| sp P20339-2 RAB5A_HUMAN | 0.01981735 | 0          |
| sp O75155 CAND2_HUMAN   | 0.0198288  | 0          |
| sp Q9H299 SH3L3_HUMAN   | 0.02031708 | 0.09894868 |
| sp P51452-2 DUS3_HUMAN  | 0.02035904 | 0          |
| sp P23528 COF1_HUMAN    | 0.02077866 | 0          |
| sp Q92696 PGTA_HUMAN    | 0.0208931  | 0          |
| sp P47756-2 CAPZB_HUMAN | 0.02152634 | 0.02388411 |
| sp P09497-2 CLCB_HUMAN  | 0.02172089 | 0          |
| sp P04899-3 GNAI2_HUMAN | 0.0218277  | 0          |
| sp O75306-2 NDUS2_HUMAN | 0.02214241 | 0.2178309  |
| sp P55786 PSA_HUMAN     | 0.02218628 | 0.19276452 |
| sp P62304 RUXE_HUMAN    | 0.02231026 | 0          |
| sp Q9BSJ8-2 ESYT1_HUMAN | 0.02278519 | 0.01044662 |
| sp P46939-2 UTRO_HUMAN  | 0.02289581 | 0.04973141 |
| sp P61923-5 COPZ1_HUMAN | 0.0229702  | 0          |
| sp Q96HY6 DDRKG_HUMAN   | 0.02315521 | 0.06291623 |
| sp P17612 KAPCA_HUMAN   | 0.02331734 | 0          |
| sp Q13404 UB2V1_HUMAN   | 0.02334976 | 0          |
| sp O94905 ERLN2_HUMAN   | 0.02359963 | 0          |
| sp Q16775-2 GLO2_HUMAN  | 0.0236845  | 0          |
| sp Q9UBV8 PEF1_HUMAN    | 0.02434921 | 0          |
| sp Q96QK1 VPS35_HUMAN   | 0.02451897 | 0.19149946 |
| sp P15090 FABP4_HUMAN   | 0.02486992 | 0          |

|                         |            |            |
|-------------------------|------------|------------|
| sp Q16543 CDC37_HUMAN   | 0.02512932 | 0          |
| sp Q13188 STK3_HUMAN    | 0.0255909  | 0          |
| sp O00499-10 BIN1_HUMAN | 0.02565002 | 0          |
| sp Q9Y224 RTRAF_HUMAN   | 0.02578735 | 0.20467198 |
| sp E9PAV3 NACAM_HUMAN   | 0.02585602 | 0          |
| sp Q16787-3 LAMA3_HUMAN | 0.02597809 | 0.19149946 |
| sp Q3LXA3 TKFC_HUMAN    | 0.0263195  | 0.10280301 |
| sp P49593 PPM1F_HUMAN   | 0.02634144 | 0          |
| sp Q6DKJ4 NXN_HUMAN     | 0.02635002 | 0          |
| sp Q9H845 ACAD9_HUMAN   | 0.02658081 | 0          |
| sp P24821-4 TENA_HUMAN  | 0.02688789 | 0.071984   |
| sp P22695 QCR2_HUMAN    | 0.02749443 | 0.02174174 |
| sp Q13409-2 DC1I2_HUMAN | 0.0281868  | 0          |
| sp Q9NY15 STAB1_HUMAN   | 0.02863693 | 0          |
| sp P06753-2 TPM3_HUMAN  | 0.02917862 | 0          |
| sp P15311 EZRI_HUMAN    | 0.02918053 | 0          |
| sp O00410 IPO5_HUMAN    | 0.02920914 | 0.06986027 |
| sp Q6XQN6 PNCB_HUMAN    | 0.02937698 | 0          |
| sp P09525 ANXA4_HUMAN   | 0.0294075  | 0.01406953 |
| sp Q9NSD9 SYFB_HUMAN    | 0.02985764 | 0          |
| sp Q9NPJ3-2 ACO13_HUMAN | 0.03058052 | 0          |
| sp Q9NQC3 RTN4_HUMAN    | 0.03091812 | 0.26737198 |
| sp P14678 RSMB_HUMAN    | 0.03134155 | 0.19149946 |
| sp Q9H0D6 XRN2_HUMAN    | 0.03320885 | 0.25789237 |
| sp P40939 ECHA_HUMAN    | 0.03330231 | 0.07369066 |
| sp Q9P2T1-2 GMPR2_HUMAN | 0.03363609 | 0          |
| sp P07384 CAN1_HUMAN    | 0.03373718 | 0          |
| sp P13797 PLST_HUMAN    | 0.03376389 | 0.00697919 |
| sp Q16647 PTGIS_HUMAN   | 0.03455544 | 0          |
| sp Q06136 KDSR_HUMAN    | 0.03455734 | 0          |
| sp P04632 CPNS1_HUMAN   | 0.03457832 | 0.02174174 |
| sp P18669 PGAM1_HUMAN   | 0.03470802 | 0          |
| sp P28072 PSB6_HUMAN    | 0.03494453 | 0          |
| sp O95865 DDAH2_HUMAN   | 0.03538132 | 0.01819076 |
| sp P38919 IF4A3_HUMAN   | 0.03542709 | 0.02174174 |
| sp P50454 SERPH_HUMAN   | 0.03556442 | 0.02662771 |
| sp P22392-2 NDKB_HUMAN  | 0.03581619 | 0          |
| sp P35268 RL22_HUMAN    | 0.03596306 | 0          |
| sp P25705 ATPA_HUMAN    | 0.03596878 | 0.07107546 |
| sp P46940 IQGA1_HUMAN   | 0.03609085 | 0.05398579 |
| sp Q09161 NCBP1_HUMAN   | 0.03625107 | 0          |
| sp P84095 RHOG_HUMAN    | 0.03674126 | 0.5204253  |
| sp P48147 PPCE_HUMAN    | 0.03683853 | 0          |
| sp P12081-4 SYHC_HUMAN  | 0.03694916 | 0          |
| sp O75083 WDR1_HUMAN    | 0.03722572 | 0          |

|                          |            |            |
|--------------------------|------------|------------|
| sp P0DJI8 SAA1_HUMAN     | 0.03725815 | 0          |
| sp P50552 VASP_HUMAN     | 0.03735542 | 0          |
| sp Q08379 GOGA2_HUMAN    | 0.03795815 | 0          |
| sp O75915 PRAF3_HUMAN    | 0.03881264 | 0          |
| sp Q9H0E2 TOLIP_HUMAN    | 0.03893471 | 0          |
| sp P49902-2 5NTC_HUMAN   | 0.03933525 | 0          |
| sp Q13596-2 SNX1_HUMAN   | 0.03938294 | 0          |
| sp O00764-2 PDXK_HUMAN   | 0.03957844 | 0.2207585  |
| sp O43865 SAHH2_HUMAN    | 0.0397377  | 0          |
| sp Q13884 SNTB1_HUMAN    | 0.03975296 | 0          |
| sp P49903-2 SPS1_HUMAN   | 0.03979397 | 0          |
| sp Q96BW5-2 PTER_HUMAN   | 0.04001617 | 0          |
| sp Q04917 1433F_HUMAN    | 0.04035568 | 0.09215608 |
| sp P08758 ANXA5_HUMAN    | 0.04094124 | 0          |
| sp P48059-3 LIMS1_HUMAN  | 0.04157066 | 0          |
| sp P30566 PUR8_HUMAN     | 0.04160309 | 0          |
| sp O60832-2 DKC1_HUMAN   | 0.04233551 | 0          |
| sp P52597 HNRPF_HUMAN    | 0.04255867 | 0          |
| sp Q9Y6C2 EMIL1_HUMAN    | 0.04256821 | 0.00764478 |
| sp O43747-2 AP1G1_HUMAN  | 0.04354858 | 0          |
| sp O43707 ACTN4_HUMAN    | 0.04380989 | 0          |
| sp Q16822 PCKGM_HUMAN    | 0.04404068 | 0          |
| sp P54727 RD23B_HUMAN    | 0.04471493 | 0          |
| sp P14868 SYDC_HUMAN     | 0.04482079 | 0          |
| sp P40925-2 MDHC_HUMAN   | 0.0454731  | 0          |
| sp Q9P2M7 CING_HUMAN     | 0.04577732 | 0          |
| sp Q92688-2 AN32B_HUMAN  | 0.04577828 | 0          |
| sp Q9UMS4 PRP19_HUMAN    | 0.04583931 | 0          |
| sp Q13505-3 MTX1_HUMAN   | 0.04594231 | 0          |
| sp P27348 1433T_HUMAN    | 0.04659462 | 0          |
| sp Q14103-3 HNRPD_HUMAN  | 0.04702568 | 0.20791115 |
| sp P61970 NTF2_HUMAN     | 0.04706383 | 0          |
| sp O94979-10 SC31A_HUMAN | 0.04795647 | 0          |
| sp P63010-2 AP2B1_HUMAN  | 0.04810715 | 0.04053069 |
| sp Q68EM7-2 RHG17_HUMAN  | 0.04829216 | 0          |
| sp O95425-4 SVIL_HUMAN   | 0.04852676 | 0          |
| sp Q9Y2S2 CRYL1_HUMAN    | 0.04853058 | 0.1342476  |
| sp Q13724-2 MOGS_HUMAN   | 0.04875183 | 0          |
| sp P51884 LUM_HUMAN      | 0.049263   | 0.02127174 |
| sp P13667 PDIA4_HUMAN    | 0.0494175  | 0.01189081 |
| sp O15173-2 PGRC2_HUMAN  | 0.04988289 | 0.17319627 |
| sp Q99497 PARK7_HUMAN    | 0.049963   | 0.44572112 |
| sp P46736-3 BRCC3_HUMAN  | 0.0501976  | 0          |
| sp Q5SSJ5-2 HP1B3_HUMAN  | 0.05023575 | 0.02662771 |
| sp Q9H4A4 AMPB_HUMAN     | 0.05032539 | 0.00464747 |

|                         |            |            |
|-------------------------|------------|------------|
| sp Q15366-2 PCBP2_HUMAN | 0.05088806 | 0          |
| sp P28482 MK01_HUMAN    | 0.05089378 | 0          |
| sp O75367-2 H2AY_HUMAN  | 0.05127525 | 0.06953826 |
| sp O43795-2 MYO1B_HUMAN | 0.05137539 | 0.09339783 |
| sp P42025 ACTY_HUMAN    | 0.05206299 | 0          |
| sp Q13162 PRDX4_HUMAN   | 0.05254173 | 0          |
| sp Q9P0K7-2 RAI14_HUMAN | 0.05269241 | 0          |
| sp Q9Y678 COPG1_HUMAN   | 0.05288696 | 0.01406953 |
| sp P08238 HS90B_HUMAN   | 0.05313873 | 0.05299055 |
| sp Q00765 REEP5_HUMAN   | 0.05316162 | 0.0846519  |
| sp Q15181 IPYR_HUMAN    | 0.05328369 | 0          |
| sp P30419-2 NMT1_HUMAN  | 0.05348396 | 0          |
| sp O00231-2 PSD11_HUMAN | 0.05355454 | 0.1500082  |
| sp P55795 HNRH2_HUMAN   | 0.05355644 | 0          |
| sp Q8TBC4 UBA3_HUMAN    | 0.05377197 | 0          |
| sp Q86VS8 HOOK3_HUMAN   | 0.05378723 | 0          |
| sp Q9Y6B6 SAR1B_HUMAN   | 0.0538826  | 0          |
| sp Q9UH99-2 SUN2_HUMAN  | 0.0540762  | 0          |
| sp P52907 CAZA1_HUMAN   | 0.05429459 | 0.18414244 |
| sp Q969X5 ERGI1_HUMAN   | 0.05429459 | 0          |
| sp Q8IWL2-2 SFTA1_HUMAN | 0.05452347 | 0.32654193 |
| sp Q7Z7G0 TARSH_HUMAN   | 0.0547905  | 0          |
| sp Q96I15 SCLY_HUMAN    | 0.05496407 | 0          |
| sp P25789 PSA4_HUMAN    | 0.05509567 | 0          |
| sp Q9NX63 MIC19_HUMAN   | 0.05510521 | 0          |
| sp P61006 RAB8A_HUMAN   | 0.05515099 | 0          |
| sp Q5T013-4 HYI_HUMAN   | 0.05515862 | 0          |
| sp P09496-2 CLCA_HUMAN  | 0.05535507 | 0          |
| sp Q1KMD3 HNRL2_HUMAN   | 0.05540276 | 0          |
| sp P50453 SPB9_HUMAN    | 0.0554142  | 0.01343579 |
| sp P30050 RL12_HUMAN    | 0.05583    | 0.20467198 |
| sp P60900 PSA6_HUMAN    | 0.05598068 | 0          |
| sp P31930 QCR1_HUMAN    | 0.05611801 | 0          |
| sp O95050-2 INMT_HUMAN  | 0.05612946 | 0          |
| sp Q12907 LMAN2_HUMAN   | 0.05643082 | 0          |
| sp Q92882 OSTF1_HUMAN   | 0.05709744 | 0.06291623 |
| sp P15121 ALDR_HUMAN    | 0.05713272 | 0          |
| sp P36776-2 LONM_HUMAN  | 0.05719757 | 0          |
| sp P01911 2B1F_HUMAN    | 0.05741501 | 0          |
| sp Q86TX2 ACOT1_HUMAN   | 0.05788803 | 0          |
| sp Q99729-2 ROAA_HUMAN  | 0.05807686 | 0.5204253  |
| sp P07195 LDHB_HUMAN    | 0.05825996 | 0          |
| sp Q15417 CNN3_HUMAN    | 0.05882645 | 0          |
| sp P36871 PGM1_HUMAN    | 0.05898285 | 0          |
| sp O95782-2 AP2A1_HUMAN | 0.05920029 | 0          |

|                         |            |            |
|-------------------------|------------|------------|
| sp Q9P258 RCC2_HUMAN    | 0.05974388 | 0          |
| sp Q92947 GCDH_HUMAN    | 0.0597477  | 0          |
| sp Q7L2H7 EIF3M_HUMAN   | 0.05982018 | 0.09894868 |
| sp Q8WZA0-2 LZIC_HUMAN  | 0.05993748 | 0          |
| sp P10301 RRAS_HUMAN    | 0.06015015 | 0          |
| sp O14980 XPO1_HUMAN    | 0.06015587 | 0          |
| sp P05165-2 PCCA_HUMAN  | 0.06088638 | 0          |
| sp O60506-3 HNRPQ_HUMAN | 0.06090927 | 0          |
| sp P09972 ALDOC_HUMAN   | 0.06105614 | 0          |
| sp P63279 UBC9_HUMAN    | 0.062603   | 0          |
| sp Q8N1G4 LRC47_HUMAN   | 0.06296921 | 0.06986027 |
| sp P48444 COPD_HUMAN    | 0.06298637 | 0          |
| sp P22102 PUR2_HUMAN    | 0.06307697 | 0          |
| sp Q9Y696 CLIC4_HUMAN   | 0.06321716 | 0          |
| sp P28066 PSA5_HUMAN    | 0.06330681 | 0          |
| sp Q9P0L0-2 VAPA_HUMAN  | 0.06342125 | 0.02174174 |
| sp Q9Y5P6-2 GMPPB_HUMAN | 0.06374359 | 0          |
| sp Q13247-3 SRSF6_HUMAN | 0.06394959 | 0.19149946 |
| sp Q9NP72-2 RAB18_HUMAN | 0.06402969 | 0          |
| sp O00483 NDUA4_HUMAN   | 0.06420326 | 0          |
| sp Q15691 MARE1_HUMAN   | 0.06432343 | 0          |
| sp P17987 TCPA_HUMAN    | 0.06433678 | 0.12893641 |
| sp P19474 RO52_HUMAN    | 0.06467629 | 0          |
| sp Q96C23 GALM_HUMAN    | 0.06474018 | 0          |
| sp O75436 VP26A_HUMAN   | 0.06506348 | 0          |
| sp Q9NZL9-2 MAT2B_HUMAN | 0.06511307 | 0          |
| sp P02768 ALBU_HUMAN    | 0.06556702 | 0.74178255 |
| sp P26639-2 SYTC_HUMAN  | 0.06572151 | 0          |
| sp Q9NR45 SIAS_HUMAN    | 0.06584168 | 0          |
| sp Q15185-3 TEBP_HUMAN  | 0.06595802 | 0          |
| sp P78527 PRKDC_HUMAN   | 0.06599045 | 0          |
| sp Q9Y281 COF2_HUMAN    | 0.06718254 | 0          |
| sp P53621-2 COPA_HUMAN  | 0.06768417 | 0          |
| sp P12111 CO6A3_HUMAN   | 0.06774712 | 0.35520625 |
| sp Q99460-2 PSMD1_HUMAN | 0.06791687 | 0          |
| sp P14174 MIF_HUMAN     | 0.06825447 | 0          |
| sp P58546 MTPN_HUMAN    | 0.06827927 | 0          |
| sp P23526 SAHH_HUMAN    | 0.06846046 | 0.08041298 |
| sp P26599-2 PTBP1_HUMAN | 0.06925964 | 0          |
| sp O14617-4 AP3D1_HUMAN | 0.06937695 | 0          |
| sp P04275 VWF_HUMAN     | 0.06959152 | 0          |
| sp Q14204 DYHC1_HUMAN   | 0.06960869 | 0.12838145 |
| sp Q9P2R7-2 SUCB1_HUMAN | 0.06964302 | 0          |
| sp P48047 ATPO_HUMAN    | 0.06988144 | 0.1329664  |
| sp O76011 KRT34_HUMAN   | 0.07020569 | 0          |

|                         |            |            |
|-------------------------|------------|------------|
| sp Q6KB66-2 K2C80_HUMAN | 0.07066727 | 0          |
| sp P06756-3 ITAV_HUMAN  | 0.07076836 | 0          |
| sp Q16531 DDB1_HUMAN    | 0.0709877  | 0.4210128  |
| sp Q9H9G7-2 AGO3_HUMAN  | 0.07123566 | 0          |
| sp P00746 CFAD_HUMAN    | 0.07250214 | 0          |
| sp P49257 LMAN1_HUMAN   | 0.07339287 | 0          |
| sp P12956 XRCC6_HUMAN   | 0.07395554 | 0          |
| sp Q6YHK3-4 CD109_HUMAN | 0.07396698 | 0.2178309  |
| sp P27695 APEX1_HUMAN   | 0.0740242  | 0          |
| sp Q14139-2 UBE4A_HUMAN | 0.07470703 | 0          |
| sp P19525-2 E2AK2_HUMAN | 0.07481289 | 0          |
| sp Q15075 EEA1_HUMAN    | 0.07523727 | 0.13150784 |
| sp P11413-3 G6PD_HUMAN  | 0.0753479  | 0          |
| sp Q14764 MVP_HUMAN     | 0.07541084 | 0.15575379 |
| sp P01116-2 RASK_HUMAN  | 0.07650566 | 0          |
| sp P36542 ATPG_HUMAN    | 0.07652855 | 0          |
| sp Q14203-4 DCTN1_HUMAN | 0.07679939 | 0.03712561 |
| sp P33151 CADH5_HUMAN   | 0.07760811 | 0          |
| sp Q15172-2 2A5A_HUMAN  | 0.07770157 | 0          |
| sp Q02978 M2OM_HUMAN    | 0.07783508 | 0.24097534 |
| sp P49368 TCPG_HUMAN    | 0.07785797 | 0.3915664  |
| sp P02649 APOE_HUMAN    | 0.07857513 | 0.02863072 |
| sp P39656-3 OST48_HUMAN | 0.0789032  | 0.2591514  |
| sp P35232 PHB_HUMAN     | 0.0792923  | 0.07131392 |
| sp Q9Y5Z4-2 HEBP2_HUMAN | 0.07992554 | 0          |
| sp Q5JPE7-2 NOMO2_HUMAN | 0.08025742 | 0          |
| sp Q96A33-2 CCD47_HUMAN | 0.08034515 | 0          |
| sp P11233 RALA_HUMAN    | 0.0803566  | 0.5204253  |
| sp Q99798 ACON_HUMAN    | 0.08040047 | 0          |
| sp P10606 COX5B_HUMAN   | 0.08049774 | 0          |
| sp Q99459 CDC5L_HUMAN   | 0.0809021  | 0          |
| sp O75396 SC22B_HUMAN   | 0.08211136 | 0.03367973 |
| sp O95336 6PGL_HUMAN    | 0.0821743  | 0.11612091 |
| sp P49720 PSB3_HUMAN    | 0.08240891 | 0.04454162 |
| sp P09104-2 ENOG_HUMAN  | 0.08323479 | 0          |
| sp P07900-2 HS90A_HUMAN | 0.08348656 | 0          |
| sp Q9Y3F4-2 STRAP_HUMAN | 0.08371925 | 0          |
| sp P00491 PNPH_HUMAN    | 0.08419228 | 0.14672586 |
| sp O75368 SH3L1_HUMAN   | 0.0845089  | 0          |
| sp Q15005 SPCS2_HUMAN   | 0.08472443 | 0          |
| sp Q15365 PCBP1_HUMAN   | 0.08480454 | 0.0846519  |
| sp Q9BR76 COR1B_HUMAN   | 0.08488464 | 0          |
| sp P49961 ENTP1_HUMAN   | 0.08503914 | 0.04454162 |
| sp P13798 ACPH_HUMAN    | 0.08532333 | 0          |
| sp P61160 ARP2_HUMAN    | 0.08600044 | 0          |

|                         |            |            |
|-------------------------|------------|------------|
| sp P23083 HV102_HUMAN   | 0.08623886 | 0          |
| sp P63096 GNAI1_HUMAN   | 0.08634186 | 0          |
| sp Q08257 QOR_HUMAN     | 0.08642006 | 0.15510327 |
| sp A0MZ66-5 SHOT1_HUMAN | 0.08650017 | 0          |
| sp P46821 MAP1B_HUMAN   | 0.08656311 | 0          |
| sp O75937 DNJC8_HUMAN   | 0.08678627 | 0          |
| sp O00299 CLIC1_HUMAN   | 0.08690643 | 0.00842351 |
| sp P53597 SUCA_HUMAN    | 0.08693314 | 0          |
| sp P35998 PRS7_HUMAN    | 0.08713913 | 0.13973783 |
| sp Q9HC35-2 EMAL4_HUMAN | 0.08736992 | 0.55270666 |
| sp P13693 TCTP_HUMAN    | 0.08814812 | 0          |
| sp Q969G5 CAVN3_HUMAN   | 0.08820152 | 0.06291623 |
| sp P62495-2 ERF1_HUMAN  | 0.08820725 | 0          |
| sp P48163 MAOX_HUMAN    | 0.08895302 | 0.06986027 |
| sp P49821-2 NDUV1_HUMAN | 0.08932877 | 0          |
| sp Q16851-2 UGPA_HUMAN  | 0.08937264 | 0          |
| sp P13073 COX41_HUMAN   | 0.08974075 | 0          |
| sp P11766 ADHX_HUMAN    | 0.09071922 | 0.33432218 |
| sp P56199 ITA1_HUMAN    | 0.09140968 | 0.4488957  |
| sp O60256-3 KPRB_HUMAN  | 0.09157944 | 0.21439649 |
| sp P05198 IF2A_HUMAN    | 0.09230423 | 0          |
| sp Q15046-2 SYK_HUMAN   | 0.09237862 | 0          |
| sp P59998 ARPC4_HUMAN   | 0.09270477 | 0          |
| sp P48637 GSHB_HUMAN    | 0.09293175 | 0.09215608 |
| sp Q96M27-3 PRRC1_HUMAN | 0.09315682 | 0          |
| sp P55809 SCOT1_HUMAN   | 0.09344673 | 0          |
| sp Q9BPW8 NIPS1_HUMAN   | 0.09347916 | 0          |
| sp P30520 PURA2_HUMAN   | 0.0937748  | 0          |
| sp Q9Y262 EIF3L_HUMAN   | 0.09386253 | 0          |
| sp Q13423 NNTM_HUMAN    | 0.0939045  | 0.07727676 |
| sp Q92506 DHB8_HUMAN    | 0.09469223 | 0          |
| sp P47755 CAZA2_HUMAN   | 0.09495926 | 0          |
| sp P07988 PSPB_HUMAN    | 0.09502029 | 0.7980934  |
| sp Q96AC1 FERM2_HUMAN   | 0.09533405 | 0.14237618 |
| sp P55036-2 PSMD4_HUMAN | 0.09540558 | 0          |
| sp Q96CN7 ISOC1_HUMAN   | 0.09569168 | 0          |
| sp Q08945 SSRP1_HUMAN   | 0.09576607 | 0          |
| sp P49354 FNNTA_HUMAN   | 0.09583283 | 0.35795313 |
| sp Q86WV6 STING_HUMAN   | 0.09630394 | 0          |
| sp Q9BU23-3 LMF2_HUMAN  | 0.0968647  | 0          |
| sp Q8NBF2-2 NHLC2_HUMAN | 0.09689331 | 0          |
| sp Q92499 DDX1_HUMAN    | 0.09703827 | 0          |
| sp Q14980-2 NUMA1_HUMAN | 0.09794426 | 0.6092752  |
| sp Q86UX7-2 URP2_HUMAN  | 0.09838867 | 0          |
| sp Q9UQ80 PA2G4_HUMAN   | 0.09879875 | 0          |



|                         |            |            |
|-------------------------|------------|------------|
| sp P21283 VATC1_HUMAN   | 0.09938431 | 0          |
| sp Q9NTJ5 SAC1_HUMAN    | 0.09958267 | 0.03043297 |
| sp P08865 RSSA_HUMAN    | 0.09967423 | 0          |
| sp P51153 RAB13_HUMAN   | 0.1000042  | 0          |
| sp P04424-2 ARLY_HUMAN  | 0.10026169 | 0          |
| sp Q00577 PURA_HUMAN    | 0.10042191 | 0.06291623 |
| sp Q9P2E9 RRBP1_HUMAN   | 0.10050774 | 0.19478811 |
| sp P30153 2AAA_HUMAN    | 0.10056305 | 0          |
| sp P19404 NDUV2_HUMAN   | 0.10072327 | 0          |
| sp P49419-2 AL7A1_HUMAN | 0.10089684 | 0          |
| sp Q9BUQ8 DDX23_HUMAN   | 0.10125732 | 0          |
| sp Q9Y3I0 RTCB_HUMAN    | 0.10133743 | 0.21989624 |
| sp O95861-4 BPNT1_HUMAN | 0.10147476 | 0          |
| sp O75881 CP7B1_HUMAN   | 0.10165024 | 0          |
| sp O75874 IDHC_HUMAN    | 0.10169792 | 0          |
| sp Q13045-3 FLII_HUMAN  | 0.10178566 | 0          |
| sp P53602 MVD1_HUMAN    | 0.10233116 | 0          |
| sp Q96FW1 OTUB1_HUMAN   | 0.10240173 | 0          |
| sp Q9Y490 TLN1_HUMAN    | 0.10301209 | 0.09570572 |
| sp P42330 AK1C3_HUMAN   | 0.10333633 | 0          |
| sp P0DMV9 HS71B_HUMAN   | 0.10349274 | 0          |
| sp O14818 PSA7_HUMAN    | 0.10361099 | 0.04454162 |
| sp P24534 EF1B_HUMAN    | 0.10389519 | 0          |
| sp Q8WUM4 PDC6I_HUMAN   | 0.10393524 | 0.16644415 |
| sp O15498-2 YKT6_HUMAN  | 0.10422516 | 0          |
| sp O43143 DHX15_HUMAN   | 0.10428619 | 0.3630891  |
| sp P61769 B2MG_HUMAN    | 0.10549927 | 0          |
| sp P54886-2 P5CS_HUMAN  | 0.10551071 | 0          |
| sp Q8N5K1 CISD2_HUMAN   | 0.10592842 | 0.45033538 |
| sp Q99439 CNN2_HUMAN    | 0.10597801 | 0          |
| sp Q02543 RL18A_HUMAN   | 0.1060524  | 0.04454162 |
| sp P53618 COPB_HUMAN    | 0.10629845 | 0.04904167 |
| sp P08571 CD14_HUMAN    | 0.10648918 | 0.37060758 |
| sp O94911-3 ABCA8_HUMAN | 0.1065197  | 0.45033538 |
| sp Q15126 PMVK_HUMAN    | 0.10664749 | 0.19149946 |
| sp Q09028-3 RBBP4_HUMAN | 0.10680389 | 0          |
| sp O15511 ARPC5_HUMAN   | 0.10683441 | 0          |
| sp O15372 EIF3H_HUMAN   | 0.10684776 | 0          |
| sp Q92930 RAB8B_HUMAN   | 0.10691643 | 0          |
| sp Q9UHX1-2 PUF60_HUMAN | 0.10700989 | 0          |
| sp O14828-2 SCAM3_HUMAN | 0.1070652  | 0          |
| sp Q9UBF2 COPG2_HUMAN   | 0.10707855 | 0          |
| sp Q9UPQ0-3 LIMC1_HUMAN | 0.10735893 | 0.24097534 |
| sp Q29865 1C18_HUMAN    | 0.10759926 | 0.2178309  |
| sp P51553-2 IDH3G_HUMAN | 0.10764694 | 0          |

|                         |            |            |
|-------------------------|------------|------------|
| sp Q71U36-2 TBA1A_HUMAN | 0.10790062 | 0          |
| sp P12955 PEPD_HUMAN    | 0.10832596 | 0          |
| sp P62330 ARF6_HUMAN    | 0.10846138 | 0          |
| sp P30086 PEBP1_HUMAN   | 0.10893631 | 0          |
| sp P08729 K2C7_HUMAN    | 0.10906792 | 0.19248605 |
| sp P61457 PHS_HUMAN     | 0.10921288 | 0          |
| sp O95834 EMAL2_HUMAN   | 0.10939407 | 0.02174174 |
| sp P08559-2 ODPA_HUMAN  | 0.10948753 | 0          |
| sp P07741 APT_HUMAN     | 0.10956955 | 0          |
| sp P52566 GDIR2_HUMAN   | 0.11003113 | 0          |
| sp Q92817 EVPL_HUMAN    | 0.1101799  | 0          |
| sp Q30134 2B18_HUMAN    | 0.11049652 | 0          |
| sp P31943 HNRH1_HUMAN   | 0.11090279 | 0.03367973 |
| sp O75340-2 PDCD6_HUMAN | 0.11099815 | 0          |
| sp P30041 PRDX6_HUMAN   | 0.11139488 | 0.01576272 |
| sp P31942-2 HNRH3_HUMAN | 0.11150932 | 0.48520416 |
| sp Q12906-2 ILF3_HUMAN  | 0.1115303  | 0.01700861 |
| sp Q13148 TADBP_HUMAN   | 0.11176109 | 0.35795313 |
| sp P45974-2 UBP5_HUMAN  | 0.11190796 | 0.04872547 |
| sp Q9UKG1 DP13A_HUMAN   | 0.11194992 | 0          |
| sp Q93009-3 UBP7_HUMAN  | 0.11199951 | 0          |
| sp Q8IY17-3 PLPL6_HUMAN | 0.11215591 | 0          |
| sp P68104 EF1A1_HUMAN   | 0.11245155 | 0.14871502 |
| sp Q5JTV8-3 TOIP1_HUMAN | 0.11271858 | 0          |
| sp P08754 GNAI3_HUMAN   | 0.11314201 | 0          |
| sp Q2TAY7 SMU1_HUMAN    | 0.11333466 | 0          |
| sp Q9UBS4 DJB11_HUMAN   | 0.1135006  | 0          |
| sp P40306 PSB10_HUMAN   | 0.11367226 | 0.61034113 |
| sp P23284 PPIB_HUMAN    | 0.11381912 | 0.21680334 |
| sp P52306 GDS1_HUMAN    | 0.11383057 | 0          |
| sp Q16401-2 PSMD5_HUMAN | 0.11392784 | 0.05621411 |
| sp Q9P0V9-2 SEP10_HUMAN | 0.11458778 | 0          |
| sp P60981-2 DEST_HUMAN  | 0.1146183  | 0          |
| sp Q14558-2 KPRA_HUMAN  | 0.11473179 | 0.656254   |
| sp P55884-2 EIF3B_HUMAN | 0.11509514 | 0.23541966 |
| sp P04040 CATA_HUMAN    | 0.11517143 | 0.6542169  |
| sp P46063 RECQ1_HUMAN   | 0.11519241 | 0.05483269 |
| sp P56134-3 ATPK_HUMAN  | 0.11530304 | 0          |
| sp P40227 TCPZ_HUMAN    | 0.11621094 | 0.10328458 |
| sp P04844 RPN2_HUMAN    | 0.11645699 | 0.33495146 |
| sp Q96C19 EFHD2_HUMAN   | 0.1169014  | 0          |
| sp Q8N1B4-2 VPS52_HUMAN | 0.11702728 | 0          |
| sp Q5TFE4 NT5D1_HUMAN   | 0.11785317 | 0          |
| sp P29992 GNA11_HUMAN   | 0.11810684 | 0          |
| sp P63241 IF5A1_HUMAN   | 0.11818314 | 0.7588735  |

|                         |            |            |
|-------------------------|------------|------------|
| sp Q6UVK1 CSPG4_HUMAN   | 0.11835861 | 0          |
| sp P53396-2 ACLY_HUMAN  | 0.11844635 | 0.11475069 |
| sp P08294 SODE_HUMAN    | 0.11888886 | 0          |
| sp Q9Y3Z3 SAMH1_HUMAN   | 0.11917496 | 0          |
| sp P01859 IGHG2_HUMAN   | 0.11936569 | 0.84879977 |
| sp O00116 ADAS_HUMAN    | 0.12017632 | 0          |
| sp O60814 H2B1K_HUMAN   | 0.12043381 | 1.1932944  |
| sp Q9UBQ7 GRHPR_HUMAN   | 0.1204586  | 0          |
| sp Q9NQR4 NIT2_HUMAN    | 0.12055588 | 0.06291623 |
| sp P46976 GLYG_HUMAN    | 0.12067604 | 0.30372584 |
| sp Q96AE4-2 FUBP1_HUMAN | 0.12072372 | 0          |
| sp P51888 PRELP_HUMAN   | 0.12074661 | 0          |
| sp Q14498-2 RBM39_HUMAN | 0.12094116 | 0.40256184 |
| sp O60271-5 JIP4_HUMAN  | 0.12113667 | 0.19149946 |
| sp Q9Y3A3-3 PHOCN_HUMAN | 0.12120438 | 0          |
| sp P00441 SODC_HUMAN    | 0.12145996 | 0          |
| sp O00291 HIP1_HUMAN    | 0.12179184 | 0          |
| sp P27338 AOFB_HUMAN    | 0.12202454 | 0          |
| sp P00558 PGK1_HUMAN    | 0.12207413 | 0          |
| sp P09917-3 LOX5_HUMAN  | 0.12222481 | 0.09894868 |
| sp O43390-2 HNRPR_HUMAN | 0.12270927 | 0.06210651 |
| sp P14314-2 GLU2B_HUMAN | 0.12322998 | 0.0846519  |
| sp Q9BY32 ITPA_HUMAN    | 0.1232605  | 0          |
| sp Q08209-2 PP2BA_HUMAN | 0.12385178 | 0          |
| sp Q15404 RSU1_HUMAN    | 0.12454605 | 0.14969608 |
| sp Q9P289 STK26_HUMAN   | 0.12611198 | 0.656254   |
| sp P31937 3HIDH_HUMAN   | 0.12624931 | 0          |
| sp Q9Y376 CAB39_HUMAN   | 0.12631989 | 0          |
| sp Q92841-1 DDX17_HUMAN | 0.12633896 | 0          |
| sp P35580 MYH10_HUMAN   | 0.1263504  | 0.42482498 |
| sp P13861 KAP2_HUMAN    | 0.12640381 | 0.290567   |
| sp P43307 SSRA_HUMAN    | 0.12641525 | 0.45033538 |
| sp O00567 NOP56_HUMAN   | 0.12711143 | 0          |
| sp Q9UJU6-2 DBNL_HUMAN  | 0.12804985 | 0          |
| sp P05455 LA_HUMAN      | 0.128191   | 0.07727676 |
| sp Q96G03 PGM2_HUMAN    | 0.12831879 | 0.03367973 |
| sp O00170 AIP_HUMAN     | 0.128479   | 0          |
| sp O15260-2 SURF4_HUMAN | 0.12930107 | 0          |
| sp P50395 GDIB_HUMAN    | 0.1296196  | 0.01290371 |
| sp O00534 VMA5A_HUMAN   | 0.12993813 | 0          |
| sp O60504-2 VINEX_HUMAN | 0.12998962 | 0.09894868 |
| sp P11217-2 PYGM_HUMAN  | 0.13007355 | 0          |
| sp P55060-3 XPO2_HUMAN  | 0.13021469 | 0.05634482 |
| sp Q9Y5X3 SNX5_HUMAN    | 0.13076401 | 0.37061578 |
| sp P23368 MAOM_HUMAN    | 0.13085556 | 0.04454162 |

|                         |            |            |
|-------------------------|------------|------------|
| sp P07585 PGS2_HUMAN    | 0.13103485 | 0.2718748  |
| sp Q92896-2 GSLG1_HUMAN | 0.1310463  | 0.09339783 |
| sp Q6UW02 CP20A_HUMAN   | 0.13110352 | 0.19149946 |
| sp O60763-2 USO1_HUMAN  | 0.13110542 | 0          |
| sp P22314-2 UBA1_HUMAN  | 0.13131523 | 0          |
| sp P08133 ANXA6_HUMAN   | 0.13162613 | 0.01620588 |
| sp Q14974 IMB1_HUMAN    | 0.13197899 | 0.13745423 |
| sp Q15642-3 CIP4_HUMAN  | 0.13368988 | 0          |
| sp O95833 CLIC3_HUMAN   | 0.1339035  | 0          |
| sp P20591 MX1_HUMAN     | 0.13434029 | 0.7061832  |
| sp P54819-2 KAD2_HUMAN  | 0.13444519 | 0          |
| sp Q53EL6-2 PDCD4_HUMAN | 0.13461113 | 0          |
| sp Q8N8S7-2 ENAH_HUMAN  | 0.13465881 | 0          |
| sp P02751-15 FINC_HUMAN | 0.13515854 | 0          |
| sp Q9UBB4-2 ATX10_HUMAN | 0.1356163  | 0          |
| sp Q9Y4L1 HYOU1_HUMAN   | 0.13562012 | 0.14750385 |
| sp P62136 PP1A_HUMAN    | 0.13591385 | 0          |
| sp Q13098-5 CSN1_HUMAN  | 0.13596725 | 0.04454162 |
| sp P11940-2 PABP1_HUMAN | 0.13610458 | 0          |
| sp P62942 FKB1A_HUMAN   | 0.13714981 | 0          |
| sp Q8TE77-3 SSH3_HUMAN  | 0.13715744 | 0          |
| sp P20073-2 ANXA7_HUMAN | 0.13724709 | 0.34244674 |
| sp P17980 PRS6A_HUMAN   | 0.13738823 | 0          |
| sp P14618-2 KPYM_HUMAN  | 0.13747025 | 0          |
| sp Q13310-2 PABP4_HUMAN | 0.13748932 | 0          |
| sp Q8NF37 PCAT1_HUMAN   | 0.13759327 | 0.1500082  |
| sp O43491 E41L2_HUMAN   | 0.1376667  | 0.02174174 |
| sp Q9P0J0-2 NDUAD_HUMAN | 0.1383133  | 0          |
| sp Q9BT78 CSN4_HUMAN    | 0.13832855 | 0.03367973 |
| sp P40261 NNMT_HUMAN    | 0.13840675 | 0.19149946 |
| sp Q6WCQ1-2 MPRIP_HUMAN | 0.13840675 | 0.26295313 |
| sp P60842 IF4A1_HUMAN   | 0.13853073 | 0.14750385 |
| sp Q07065 CKAP4_HUMAN   | 0.13858414 | 0.33825856 |
| sp Q15435 PP1R7_HUMAN   | 0.13877201 | 0          |
| sp Q7L1Q6-2 BZW1_HUMAN  | 0.13878632 | 0          |
| sp P15153 RAC2_HUMAN    | 0.13899231 | 0.656254   |
| sp Q9NZT2-2 OGFR_HUMAN  | 0.13899708 | 0.35795313 |
| sp Q12797-10 ASPH_HUMAN | 0.13910484 | 0.44572112 |
| sp P18206-2 VINC_HUMAN  | 0.13926697 | 0.11062484 |
| sp Q9Y4D7-2 PLXD1_HUMAN | 0.13948345 | 0          |
| sp P05388-2 RLAO_HUMAN  | 0.1397438  | 0          |
| sp P61163 ACTZ_HUMAN    | 0.13982391 | 0          |
| sp P01111 RASN_HUMAN    | 0.14011002 | 0          |
| sp O60313-10 OPA1_HUMAN | 0.14019775 | 0          |
| sp P47897 SYQ_HUMAN     | 0.14038086 | 0          |

|                          |            |            |
|--------------------------|------------|------------|
| sp Q6PCB0 VWA1_HUMAN     | 0.1413536  | 0          |
| sp O14950 ML12B_HUMAN    | 0.1415062  | 0          |
| sp Q9BTV4 TMM43_HUMAN    | 0.14159775 | 0.33495146 |
| sp P46777 RL5_HUMAN      | 0.14180946 | 0.13604218 |
| sp B5ME19 EIFCL_HUMAN    | 0.14181137 | 0.05483269 |
| sp Q92900-2 RENT1_HUMAN  | 0.14185143 | 0.3412366  |
| sp Q96IU4 ABHEB_HUMAN    | 0.14194107 | 0          |
| sp O60716-14 CTND1_HUMAN | 0.14229202 | 0          |
| sp Q99623 PHB2_HUMAN     | 0.14240456 | 0.39446053 |
| sp Q07960 RHG01_HUMAN    | 0.14263916 | 0.23973103 |
| sp P35270 SPRE_HUMAN     | 0.14266396 | 0          |
| sp Q16204 CCDC6_HUMAN    | 0.14352226 | 0          |
| sp P26038 MOES_HUMAN     | 0.14470482 | 0.10086016 |
| sp O60664-4 PLIN3_HUMAN  | 0.1452179  | 0          |
| sp P00325 ADH1B_HUMAN    | 0.14522362 | 0.03712561 |
| sp Q9UJW0-3 DCTN4_HUMAN  | 0.14565277 | 0          |
| sp Q02790 FKBP4_HUMAN    | 0.14577103 | 0.20467198 |
| sp Q15102 PA1B3_HUMAN    | 0.14586067 | 0.6298893  |
| sp Q9NP79 VTA1_HUMAN     | 0.14597893 | 0          |
| sp Q96CW1-2 AP2M1_HUMAN  | 0.14605904 | 0          |
| sp P61978-3 HNRPK_HUMAN  | 0.1467247  | 0.07488067 |
| sp Q92945 FUBP2_HUMAN    | 0.14679909 | 0.1897449  |
| sp P51571 SSRD_HUMAN     | 0.14687729 | 0          |
| sp Q7LG56-6 RIR2B_HUMAN  | 0.14735794 | 0          |
| sp P05387 RLA2_HUMAN     | 0.14764404 | 0          |
| sp P78371 TCPB_HUMAN     | 0.14805412 | 0.05908025 |
| sp Q9BVK6 TMED9_HUMAN    | 0.14848328 | 0          |
| sp P25786-2 PSA1_HUMAN   | 0.14895439 | 0.01178462 |
| sp Q96TA1-2 NIBL1_HUMAN  | 0.14910698 | 0          |
| sp P01860 IGHG3_HUMAN    | 0.14911842 | 0.56808305 |
| sp P20618 PSB1_HUMAN     | 0.14990997 | 0          |
| sp Q6IBS0 TWF2_HUMAN     | 0.15007591 | 0          |
| sp P02760 AMBP_HUMAN     | 0.15027809 | 0.1500082  |
| sp Q92890-1 UFD1_HUMAN   | 0.15028    | 0.19149946 |
| sp O75688 PPM1B_HUMAN    | 0.15064621 | 0          |
| sp Q9Y3A5 SBDS_HUMAN     | 0.15094566 | 0          |
| sp P30101 PDIA3_HUMAN    | 0.15097046 | 0.07107546 |
| sp P52565 GDIR1_HUMAN    | 0.1517353  | 0.02174174 |
| sp P04843 RPN1_HUMAN     | 0.1519413  | 0.13882811 |
| sp P39019 RS19_HUMAN     | 0.15207672 | 0.09894868 |
| sp P12277 KCRB_HUMAN     | 0.15208054 | 0.41804093 |
| sp P55084 ECHB_HUMAN     | 0.15303993 | 0.26665917 |
| sp Q8IZ83-3 A16A1_HUMAN  | 0.15306473 | 0.24295025 |
| sp P30533 AMRP_HUMAN     | 0.15317154 | 0          |
| sp Q7Z7H5-3 TMED4_HUMAN  | 0.1532917  | 0          |

|                         |            |            |
|-------------------------|------------|------------|
| sp O00303 EIF3F_HUMAN   | 0.15349007 | 0          |
| sp Q05655-2 KPCD_HUMAN  | 0.1535492  | 0.28516325 |
| sp Q99714 HCD2_HUMAN    | 0.15355301 | 0.03712561 |
| sp P54578-2 UBP14_HUMAN | 0.15397644 | 0          |
| sp P17301 ITA2_HUMAN    | 0.15424538 | 0          |
| sp Q9NUQ9 FA49B_HUMAN   | 0.15428162 | 0.30372584 |
| sp O00487 PSDE_HUMAN    | 0.15481186 | 0          |
| sp P13010 XRCC5_HUMAN   | 0.15483284 | 0          |
| sp P00736 C1R_HUMAN     | 0.15493774 | 0          |
| sp Q9BRA2 TXD17_HUMAN   | 0.15522003 | 0          |
| sp Q00610-2 CLH1_HUMAN  | 0.1552887  | 0.1483452  |
| sp P22061-2 PIMT_HUMAN  | 0.15533447 | 0.39873424 |
| sp Q9UEY8 ADDG_HUMAN    | 0.15555954 | 0          |
| sp Q00796 DHSO_HUMAN    | 0.15589714 | 0          |
| sp O15145 ARPC3_HUMAN   | 0.15629578 | 0          |
| sp Q9NR31 SAR1A_HUMAN   | 0.15648651 | 0.19149946 |
| sp Q9NQG5 RPR1B_HUMAN   | 0.15683937 | 0          |
| sp P08727 K1C19_HUMAN   | 0.15688515 | 0.45995986 |
| sp Q8WVM8 SCFD1_HUMAN   | 0.15707588 | 0          |
| sp P0DOX7 IGK_HUMAN     | 0.15735245 | 0.45033538 |
| sp Q99538-2 LGMN_HUMAN  | 0.1575203  | 0          |
| sp Q16527 CSR2_HUMAN    | 0.15754128 | 0          |
| sp P31153 METK2_HUMAN   | 0.15759468 | 0          |
| sp Q8NHP8 PLBL2_HUMAN   | 0.15778732 | 0          |
| sp O14745 NHRF1_HUMAN   | 0.1581707  | 0.48757824 |
| sp Q13243-3 SRSF5_HUMAN | 0.15847397 | 0.19149946 |
| sp Q13561-2 DCTN2_HUMAN | 0.15870857 | 0.01178462 |
| sp P51858 HDGF_HUMAN    | 0.15906525 | 0          |
| sp P63244 RACK1_HUMAN   | 0.15925026 | 0          |
| sp O60784 TOM1_HUMAN    | 0.15960884 | 0          |
| sp Q13464 ROCK1_HUMAN   | 0.1603756  | 0          |
| sp Q9Y230 RUVB2_HUMAN   | 0.16064835 | 0          |
| sp Q9UHQ9 NB5R1_HUMAN   | 0.16070747 | 0          |
| sp Q92888-2 ARHG1_HUMAN | 0.16075993 | 0          |
| sp Q6NVY1 HIBCH_HUMAN   | 0.161026   | 0          |
| sp Q14914-2 PTGR1_HUMAN | 0.1614685  | 0          |
| sp Q9UBI6 GBG12_HUMAN   | 0.16147232 | 0          |
| sp Q05707-2 COEA1_HUMAN | 0.16181564 | 0.9582053  |
| sp O15127 SCAM2_HUMAN   | 0.16199303 | 0.35795313 |
| sp O00232 PSD12_HUMAN   | 0.1629324  | 0.29066643 |
| sp P16298-2 PP2BB_HUMAN | 0.16360855 | 0          |
| sp Q99873-2 ANM1_HUMAN  | 0.16369247 | 0          |
| sp Q9BXS5-2 AP1M1_HUMAN | 0.16379738 | 0          |
| sp P12235 ADT1_HUMAN    | 0.16383171 | 0          |
| sp P49588-2 SYAC_HUMAN  | 0.16394043 | 0.3503162  |

|                         |            |            |
|-------------------------|------------|------------|
| sp O43852-5 CALU_HUMAN  | 0.16402054 | 0          |
| sp P60709 ACTB_HUMAN    | 0.16453171 | 0          |
| sp P12814 ACTN1_HUMAN   | 0.16453934 | 0          |
| sp A0AVT1 UBA6_HUMAN    | 0.16469574 | 0          |
| sp Q15942 ZYX_HUMAN     | 0.16547203 | 0.6634523  |
| sp P40763-2 STAT3_HUMAN | 0.1658516  | 0.10138063 |
| sp Q9UNH7 SNX6_HUMAN    | 0.16606522 | 0          |
| sp P31939 PUR9_HUMAN    | 0.16615486 | 0.14899042 |
| sp Q6DD88 ATLA3_HUMAN   | 0.16619682 | 0.1500082  |
| sp P06310 KV230_HUMAN   | 0.16648674 | 0          |
| sp Q9UNF0-2 PACN2_HUMAN | 0.16651154 | 0          |
| sp Q15286-2 RAB35_HUMAN | 0.16664696 | 0          |
| sp P55039 DRG2_HUMAN    | 0.16681862 | 0          |
| sp Q96HC4 PDLI5_HUMAN   | 0.1671009  | 0.74639726 |
| sp P07437 TBB5_HUMAN    | 0.16713333 | 0.06291623 |
| sp O00429-3 DNM1L_HUMAN | 0.16753769 | 0.52598757 |
| sp Q15233 NONO_HUMAN    | 0.16804504 | 0.09215608 |
| sp P35222 CTNB1_HUMAN   | 0.1685543  | 0          |
| sp Q14697-2 GANAB_HUMAN | 0.16865158 | 0          |
| sp P11177-3 ODPB_HUMAN  | 0.16942596 | 0          |
| sp O43681 ASNA_HUMAN    | 0.16965675 | 0          |
| sp P35611-2 ADDA_HUMAN  | 0.16983032 | 0          |
| sp Q02952-2 AKA12_HUMAN | 0.1701355  | 0          |
| sp Q9HCB6 SPON1_HUMAN   | 0.17065239 | 0          |
| sp Q96MM6 HS12B_HUMAN   | 0.1707325  | 0.43407488 |
| sp Q8N9N7 LRC57_HUMAN   | 0.17090034 | 0          |
| sp Q14118 DAG1_HUMAN    | 0.17213821 | 0          |
| sp Q15370-2 ELOB_HUMAN  | 0.1722393  | 0          |
| sp P08621-2 RU17_HUMAN  | 0.1728611  | 0.04454162 |
| sp Q13232 NDK3_HUMAN    | 0.17298698 | 0.312067   |
| sp Q9UGI8-2 TES_HUMAN   | 0.17322063 | 0          |
| sp P61018 RAB4B_HUMAN   | 0.17375183 | 0.45033538 |
| sp P43121 MUC18_HUMAN   | 0.17392349 | 0          |
| sp P04083 ANXA1_HUMAN   | 0.17417145 | 0.07916547 |
| sp O76003 GLRX3_HUMAN   | 0.17424774 | 0          |
| sp P01782 HV309_HUMAN   | 0.17769241 | 0          |
| sp Q8WVV9-5 HNRLI_HUMAN | 0.17773914 | 0          |
| sp P68371 TBB4B_HUMAN   | 0.17785072 | 0          |
| sp O60884 DNJA2_HUMAN   | 0.17886257 | 0          |
| sp Q8WUP2-3 FBLI1_HUMAN | 0.17887306 | 0          |
| sp O60879-2 DIAP2_HUMAN | 0.17888641 | 0          |
| sp Q9Y265 RUVB1_HUMAN   | 0.17892838 | 0          |
| sp Q9NR19-2 ACSA_HUMAN  | 0.17975235 | 0          |
| sp Q9Y6W5 WASF2_HUMAN   | 0.18025589 | 0.09339783 |
| sp P51178-2 PLCD1_HUMAN | 0.18029404 | 0.09894868 |

|                           |            |            |
|---------------------------|------------|------------|
| sp P02452 CO1A1_HUMAN     | 0.18079948 | 0.6509351  |
| sp Q9NT62-2 ATG3_HUMAN    | 0.18167305 | 0          |
| sp Q27J81-2 INF2_HUMAN    | 0.18243027 | 0          |
| sp P07360 CO8G_HUMAN      | 0.18350983 | 0.45033538 |
| sp Q93052 LPP_HUMAN       | 0.18353653 | 0.4490988  |
| sp Q9UBG0 MRC2_HUMAN      | 0.18474102 | 0.29934928 |
| sp P27361 MK03_HUMAN      | 0.18616486 | 0.04454162 |
| sp P61956-2 SUMO2_HUMAN   | 0.18621826 | 0          |
| sp P55854-2 SUMO3_HUMAN   | 0.18645859 | 0          |
| sp Q13492-2 PICAL_HUMAN   | 0.18687057 | 0          |
| sp Q9Y285 SYFA_HUMAN      | 0.1871357  | 0          |
| sp Q9UHL4 DPP2_HUMAN      | 0.1876564  | 0          |
| sp P58107 EPIPL_HUMAN     | 0.18779564 | 0.24295025 |
| sp P54725-2 RD23A_HUMAN   | 0.18782806 | 0.08779849 |
| sp P02765 FETUA_HUMAN     | 0.18794155 | 0.70235044 |
| sp Q9NRX4 PHP14_HUMAN     | 0.18808174 | 0.5204253  |
| sp P08842 STS_HUMAN       | 0.18817139 | 0          |
| sp O95340-2 PAPS2_HUMAN   | 0.18822479 | 0.2591514  |
| sp P28331-3 NDUS1_HUMAN   | 0.18825722 | 0.06986027 |
| sp Q07866-10 KLC1_HUMAN   | 0.1884346  | 0          |
| sp P63000-2 RAC1_HUMAN    | 0.18878555 | 0          |
| sp Q9BW30 TPPP3_HUMAN     | 0.1889     | 0          |
| sp Q16891-2 MIC60_HUMAN   | 0.18910408 | 0.2838047  |
| sp O43242 PSMD3_HUMAN     | 0.18929291 | 0          |
| sp P23142-4 FBLN1_HUMAN   | 0.18967819 | 0          |
| sp O14964-2 HGS_HUMAN     | 0.18971634 | 0.21439649 |
| sp P50991 TCPD_HUMAN      | 0.18983269 | 0          |
| sp Q14152-2 EIF3A_HUMAN   | 0.18986511 | 0          |
| sp P20674 COX5A_HUMAN     | 0.18996048 | 0.7827403  |
| sp P29144 TPP2_HUMAN      | 0.18999672 | 0.21719235 |
| sp Q9UIJ7 KAD3_HUMAN      | 0.19032097 | 0          |
| sp A1L0T0 ILVBL_HUMAN     | 0.19055176 | 0          |
| sp Q9Y3C8 UFC1_HUMAN      | 0.19062424 | 0          |
| sp Q9HBL0 TENS1_HUMAN     | 0.19073868 | 0.11977793 |
| sp P10643 CO7_HUMAN       | 0.19092941 | 0          |
| sp Q92747 ARC1A_HUMAN     | 0.1910286  | 0          |
| sp A0A0C4DH38 HV551_HUMAN | 0.191185   | 0          |
| sp P61020 RAB5B_HUMAN     | 0.19133377 | 0.35795313 |
| sp Q5JRX3-2 PREP_HUMAN    | 0.19191933 | 0          |
| sp P53004 BIEA_HUMAN      | 0.19201088 | 0          |
| sp P36873-2 PP1G_HUMAN    | 0.19207191 | 0          |
| sp Q53GG5-2 PDLI3_HUMAN   | 0.1920929  | 0          |
| sp P62191-2 PRS4_HUMAN    | 0.19264221 | 0.1342476  |
| sp P62701 RS4X_HUMAN      | 0.19292259 | 0.6298893  |
| sp P49915-2 GUAA_HUMAN    | 0.1931839  | 0          |



|                         |            |            |
|-------------------------|------------|------------|
| sp Q9BVC6 TM109_HUMAN   | 0.19325256 | 0.5204253  |
| sp P34932 HSP74_HUMAN   | 0.19380188 | 0.13308895 |
| sp Q15124 PGM5_HUMAN    | 0.1939888  | 0.17253529 |
| sp Q9H4G4 GAPR1_HUMAN   | 0.19403839 | 0          |
| sp P08670 VIME_HUMAN    | 0.19415283 | 0.7731812  |
| sp P12268 IMDH2_HUMAN   | 0.19457817 | 0.48520416 |
| sp P00568 KAD1_HUMAN    | 0.1948967  | 0          |
| sp P52272-2 HNRPM_HUMAN | 0.1955719  | 0.7947966  |
| sp O43837 IDH3B_HUMAN   | 0.19574165 | 0.2178309  |
| sp P62857 RS28_HUMAN    | 0.19582176 | 0.06291623 |
| sp Q06278 AOXA_HUMAN    | 0.1960659  | 0.45033538 |
| sp P62906 RL10A_HUMAN   | 0.1967907  | 0          |
| sp Q15019-2 SEPT2_HUMAN | 0.19800949 | 0.46317288 |
| sp Q5TDH0-3 DDI2_HUMAN  | 0.19865036 | 0          |
| sp Q15717 ELAV1_HUMAN   | 0.1989727  | 0          |
| sp Q5TZA2 CROCC_HUMAN   | 0.19908714 | 0.65625405 |
| sp P07814 SYEP_HUMAN    | 0.19917488 | 0.13242109 |
| sp P12111-4 CO6A3_HUMAN | 0.19932556 | 0          |
| sp P62888 RL30_HUMAN    | 0.19999886 | 0          |
| sp Q96DG6 CMBL_HUMAN    | 0.2000637  | 0          |
| sp Q15257-2 PTPA_HUMAN  | 0.20051384 | 0.21719235 |
| sp P02748 CO9_HUMAN     | 0.20060539 | 0.19484499 |
| sp Q99426 TBCB_HUMAN    | 0.20085716 | 0          |
| sp Q96RU3-3 FNBP1_HUMAN | 0.20178127 | 0          |
| sp Q04828 AK1C1_HUMAN   | 0.20215988 | 0.2178309  |
| sp P27694 RFA1_HUMAN    | 0.20220566 | 0          |
| sp Q15274 NADC_HUMAN    | 0.20221329 | 0.1342476  |
| sp O75746-2 CMC1_HUMAN  | 0.20251846 | 0          |
| sp Q08431 MFGM_HUMAN    | 0.2026329  | 0.21439649 |
| sp Q9H9B4 SFXN1_HUMAN   | 0.20336533 | 0          |
| sp Q8WXF7-2 ATLA1_HUMAN | 0.20343208 | 0          |
| sp P0CG39 POTEJ_HUMAN   | 0.20354462 | 0          |
| sp Q16555 DPYL2_HUMAN   | 0.2036171  | 0.10808486 |
| sp Q8NHV1 GIMA7_HUMAN   | 0.2038536  | 0.7061832  |
| sp P48506 GSH1_HUMAN    | 0.2039814  | 0.45033538 |
| sp O43252 PAPS1_HUMAN   | 0.20443916 | 0          |
| sp Q07812-2 BAX_HUMAN   | 0.20446587 | 0          |
| sp P50570-5 DYN2_HUMAN  | 0.20479584 | 0          |
| sp P08397-2 HEM3_HUMAN  | 0.20557785 | 0.35795313 |
| sp O95372 LYPA2_HUMAN   | 0.20656586 | 0          |
| sp P46108 CRK_HUMAN     | 0.20695686 | 0.2178309  |
| sp Q5VW32 BROX_HUMAN    | 0.20710373 | 0.19149946 |
| sp O75534-2 CSDE1_HUMAN | 0.20792389 | 0.28516325 |
| sp Q9Y3B3 TMED7_HUMAN   | 0.20843124 | 0          |
| sp Q9UHD8-3 SEPT9_HUMAN | 0.20849991 | 0          |

|                         |            |            |
|-------------------------|------------|------------|
| sp O14787-2 TNPO2_HUMAN | 0.20867538 | 0          |
| sp Q92556 ELMO1_HUMAN   | 0.2094593  | 0.35795313 |
| sp O75475 PSIP1_HUMAN   | 0.20973206 | 0          |
| sp Q9HC38-2 GLOD4_HUMAN | 0.20981407 | 0          |
| sp O95479 G6PE_HUMAN    | 0.20981407 | 0.14672586 |
| sp Q8N163-2 CCAR2_HUMAN | 0.21007633 | 0.30372584 |
| sp Q9P2X0-2 DPM3_HUMAN  | 0.21040726 | 0          |
| sp P62140 PP1B_HUMAN    | 0.21049118 | 0.09894868 |
| sp Q10713-2 MPPA_HUMAN  | 0.21154022 | 0.19149946 |
| sp P53990-2 IST1_HUMAN  | 0.211586   | 0          |
| sp Q8N392 RHG18_HUMAN   | 0.21194649 | 0          |
| sp P07357 CO8A_HUMAN    | 0.21208191 | 0.7759099  |
| sp Q9UH65 SWP70_HUMAN   | 0.21215439 | 0          |
| sp Q15631 TSN_HUMAN     | 0.21238708 | 0.30372584 |
| sp O95573 ACSL3_HUMAN   | 0.2123928  | 0          |
| sp P62826 RAN_HUMAN     | 0.21253777 | 0.03367973 |
| sp Q9NRV9 HEBP1_HUMAN   | 0.21342087 | 0.21439649 |
| sp Q63ZY3-3 KANK2_HUMAN | 0.21342087 | 0.3201336  |
| sp P62829 RL23_HUMAN    | 0.213768   | 0          |
| sp P25788-2 PSA3_HUMAN  | 0.21467209 | 0.45720983 |
| sp O60610-2 DIAP1_HUMAN | 0.21526718 | 0.29066643 |
| sp Q9UJZ1-2 STML2_HUMAN | 0.21574211 | 0.7827403  |
| sp O94776 MTA2_HUMAN    | 0.21588516 | 0          |
| sp P00748 FA12_HUMAN    | 0.21629524 | 0.19149946 |
| sp P57737-4 CORO7_HUMAN | 0.21717262 | 0          |
| sp Q9H3N1 TMX1_HUMAN    | 0.21727371 | 0          |
| sp Q8IUD2-2 RB6I2_HUMAN | 0.21775436 | 0          |
| sp Q99832 TCPH_HUMAN    | 0.21782684 | 0.02662771 |
| sp O60831 PRAF2_HUMAN   | 0.21858025 | 0.35795313 |
| sp Q92878-2 RAD50_HUMAN | 0.2191124  | 0          |
| sp Q9UBE0 SAE1_HUMAN    | 0.21956348 | 0.35193655 |
| sp Q9H3H3-1 CK068_HUMAN | 0.21964073 | 0          |
| sp Q9UPN3 MACF1_HUMAN   | 0.21984291 | 0          |
| sp P33176 KINH_HUMAN    | 0.220644   | 0.85449874 |
| sp Q7Z4H8 PLGT3_HUMAN   | 0.2206459  | 0.7588735  |
| sp Q8TDL5 BPIB1_HUMAN   | 0.2213459  | 0.17171621 |
| sp P17858-2 PFKAL_HUMAN | 0.22171783 | 0.4490988  |
| sp Q8IUX7 AEBP1_HUMAN   | 0.22190094 | 0          |
| sp P23946 CMA1_HUMAN    | 0.22190666 | 0.69308156 |
| sp Q14258 TRI25_HUMAN   | 0.22211647 | 0.48353976 |
| sp O00571-2 DDX3X_HUMAN | 0.22223663 | 0.2178309  |
| sp P62854 RS26_HUMAN    | 0.22249603 | 0.7827403  |
| sp P02794 FRIH_HUMAN    | 0.22273827 | 0.14672586 |
| sp P67936 TPM4_HUMAN    | 0.2229023  | 0.01819076 |
| sp Q7L576 CYFP1_HUMAN   | 0.22320938 | 0          |

|                         |            |            |
|-------------------------|------------|------------|
| sp P50502 F10A1_HUMAN   | 0.223526   | 0.04454162 |
| sp P43686 PRS6B_HUMAN   | 0.22371578 | 0.04454162 |
| sp Q13838-2 DX39B_HUMAN | 0.22430038 | 0.1500082  |
| sp P14550 AK1A1_HUMAN   | 0.22436523 | 0.13745423 |
| sp O00478-2 BT3A3_HUMAN | 0.22466469 | 0.19149946 |
| sp POC0S5 H2AZ_HUMAN    | 0.22473907 | 0.656254   |
| sp Q13618-2 CUL3_HUMAN  | 0.22502136 | 0.7217418  |
| sp P31689 DNJA1_HUMAN   | 0.22504807 | 0.35795313 |
| sp P16152 CBR1_HUMAN    | 0.22513008 | 0.02388411 |
| sp Q96AQ6-2 PBIP1_HUMAN | 0.22566032 | 0.3005443  |
| sp P00492 HPRT_HUMAN    | 0.22631073 | 0.7588735  |
| sp Q02878 RL6_HUMAN     | 0.22691154 | 0.45033538 |
| sp Q14019 COTL1_HUMAN   | 0.22704124 | 0.91272414 |
| sp Q9BZZ5-3 API5_HUMAN  | 0.22716713 | 0.09339783 |
| sp O15254-2 ACOX3_HUMAN | 0.22736645 | 0          |
| sp P23396 RS3_HUMAN     | 0.22744751 | 1.2535655  |
| sp P31150 GDIA_HUMAN    | 0.22749329 | 0          |
| sp P09417 DHPR_HUMAN    | 0.22812653 | 0          |
| sp Q9H3K6-2 BOLA2_HUMAN | 0.22838974 | 0          |
| sp P55209-2 NP1L1_HUMAN | 0.2285862  | 0.43633315 |
| sp Q13438-4 OS9_HUMAN   | 0.22907448 | 0          |
| sp Q96JJ3-3 ELMO2_HUMAN | 0.22942543 | 0          |
| sp P28161 GSTM2_HUMAN   | 0.23040771 | 0.7827403  |
| sp Q8TD19 NEK9_HUMAN    | 0.23049736 | 0          |
| sp Q16181-2 SEPT7_HUMAN | 0.2309246  | 0.2746514  |
| sp P14317 HCLS1_HUMAN   | 0.23214531 | 0.19149946 |
| sp P02671-2 FIBA_HUMAN  | 0.2321949  | 0.35838646 |
| sp Q9Y6N5 SQOR_HUMAN    | 0.23241806 | 1.1470993  |
| sp Q13642-1 FHL1_HUMAN  | 0.23365402 | 0          |
| sp Q9UHB6-4 LIMA1_HUMAN | 0.2339611  | 0.14672586 |
| sp P22352 GPX3_HUMAN    | 0.2344017  | 0          |
| sp P46109 CRKL_HUMAN    | 0.23484802 | 0.09894868 |
| sp Q13363 CTBP1_HUMAN   | 0.23516846 | 0          |
| sp Q7Z5L7-2 PODN_HUMAN  | 0.23582458 | 0.5204253  |
| sp Q9BUF5 TBB6_HUMAN    | 0.23608017 | 0.09894868 |
| sp Q9H2G2-2 SLK_HUMAN   | 0.23611069 | 0          |
| sp Q08170 SRSF4_HUMAN   | 0.23633385 | 0.656254   |
| sp P62834 RAP1A_HUMAN   | 0.23634338 | 0          |
| sp P55265-5 DSRAD_HUMAN | 0.23661804 | 0.45033538 |
| sp P36269-2 GGT5_HUMAN  | 0.23692322 | 1.2392054  |
| sp P43243 MATR3_HUMAN   | 0.2369976  | 0.52598757 |
| sp O75116 ROCK2_HUMAN   | 0.2379036  | 0          |
| sp P18084 ITB5_HUMAN    | 0.23832703 | 0.7061832  |
| sp P30046 DOPD_HUMAN    | 0.2390995  | 0.19149946 |
| sp P11498 PYC_HUMAN     | 0.23952103 | 0.312067   |

|                         |            |            |
|-------------------------|------------|------------|
| sp Q7KZF4 SND1_HUMAN    | 0.23985481 | 0          |
| sp P62195 PRS8_HUMAN    | 0.23994827 | 0          |
| sp Q8IUZ5 AT2L2_HUMAN   | 0.24009514 | 0          |
| sp P02675 FIBB_HUMAN    | 0.24020004 | 0.19687796 |
| sp Q8WYA6-2 CTBL1_HUMAN | 0.24025154 | 0.19149946 |
| sp O15355 PPM1G_HUMAN   | 0.24036789 | 0          |
| sp O96000-2 NDUBA_HUMAN | 0.24045944 | 0.7061832  |
| sp Q15436 SC23A_HUMAN   | 0.24092865 | 0.04454162 |
| sp Q14BN4-2 SLMAP_HUMAN | 0.24316406 | 0          |
| sp Q96C86 DCPS_HUMAN    | 0.24502563 | 0.29066643 |
| sp Q04637-4 IF4G1_HUMAN | 0.24633217 | 0.21439649 |
| sp Q96IJ6-2 GMPPA_HUMAN | 0.2467537  | 0.7498006  |
| sp Q99758 ABCA3_HUMAN   | 0.24783325 | 0.29066643 |
| sp P68366-2 TBA4A_HUMAN | 0.24818993 | 0          |
| sp Q06124-2 PTN11_HUMAN | 0.24838257 | 0.21439649 |
| sp Q99961-2 SH3G1_HUMAN | 0.25049782 | 0          |
| sp Q13425 SNTB2_HUMAN   | 0.25079155 | 0.20467198 |
| sp P32456 GBP2_HUMAN    | 0.25165176 | 0          |
| sp P11142 HSP7C_HUMAN   | 0.2519436  | 0.08300373 |
| sp Q15293 RCN1_HUMAN    | 0.2541275  | 0          |
| sp Q01813 PFKAP_HUMAN   | 0.25429153 | 0.10861364 |
| sp P14923 PLAK_HUMAN    | 0.25447083 | 0.14672586 |
| sp P35573 GDE_HUMAN     | 0.25450134 | 0.7061832  |
| sp Q13177 PAK2_HUMAN    | 0.25463104 | 0          |
| sp P29350-4 PTN6_HUMAN  | 0.25538254 | 0.8339169  |
| sp P02679-2 FIBG_HUMAN  | 0.25559616 | 0.09165865 |
| sp P07358 CO8B_HUMAN    | 0.2557125  | 0.8983557  |
| sp O14558 HSPB6_HUMAN   | 0.25616837 | 0.35193655 |
| sp P62249 RS16_HUMAN    | 0.2566719  | 0.7827403  |
| sp Q7Z4I7-3 LIMS2_HUMAN | 0.25737762 | 0.2178309  |
| sp P18077 RL35A_HUMAN   | 0.25751495 | 0.7827403  |
| sp P02533 K1C14_HUMAN   | 0.25759315 | 0.656254   |
| sp Q16576-2 RBBP7_HUMAN | 0.25762558 | 0          |
| sp O14672 ADA10_HUMAN   | 0.25781822 | 0          |
| sp Q8TDZ2-4 MICA1_HUMAN | 0.2581215  | 0          |
| sp P17844-2 DDX5_HUMAN  | 0.25942993 | 0.312067   |
| sp P10644 KAPO_HUMAN    | 0.25967598 | 0.63371044 |
| sp P42704 LPPRC_HUMAN   | 0.26208305 | 0.40256184 |
| sp Q9H3U1-2 UN45A_HUMAN | 0.2625847  | 0          |
| sp Q9Y266 NUDC_HUMAN    | 0.26268005 | 0.09894868 |
| sp P05783 K1C18_HUMAN   | 0.26273727 | 1.08751    |
| sp P28062-2 PSB8_HUMAN  | 0.26286125 | 0.97209185 |
| sp Q8WXH0-2 SYNE2_HUMAN | 0.26352692 | 0.312067   |
| sp P02792 FRIL_HUMAN    | 0.2653904  | 0          |
| sp Q00341 VIGLN_HUMAN   | 0.26558113 | 1.3006523  |

|                         |            |            |
|-------------------------|------------|------------|
| sp O15061-2 SYNEM_HUMAN | 0.26927948 | 1.120602   |
| sp P62917 RL8_HUMAN     | 0.2694397  | 0.90036625 |
| sp O95816 BAG2_HUMAN    | 0.27159882 | 0.7827403  |
| sp P31946 1433B_HUMAN   | 0.27175903 | 0          |
| sp P62081 RS7_HUMAN     | 0.27291298 | 0.35795313 |
| sp P07203 GPX1_HUMAN    | 0.27308846 | 0.56808305 |
| sp Q14195-2 DPYL3_HUMAN | 0.2732315  | 0.8397521  |
| sp P62750 RL23A_HUMAN   | 0.27324486 | 0.7827403  |
| sp O75323 NIPS2_HUMAN   | 0.27415466 | 0.7061832  |
| sp P24844 MYL9_HUMAN    | 0.27492905 | 0.7061832  |
| sp P07951 TPM2_HUMAN    | 0.27505875 | 1.071201   |
| sp Q9Y570-2 PPME1_HUMAN | 0.27534866 | 0.6070219  |
| sp Q9UNM6-2 PSD13_HUMAN | 0.27666473 | 0          |
| sp P54577 SYYC_HUMAN    | 0.27731705 | 0.61034113 |
| sp Q9UBT2 SAE2_HUMAN    | 0.27773857 | 0.7217418  |
| sp Q9BWM7 SFXN3_HUMAN   | 0.27791023 | 0          |
| sp Q9Y295 DRG1_HUMAN    | 0.27881432 | 0.19149946 |
| sp P36955 PEDF_HUMAN    | 0.2808323  | 0.47871065 |
| sp P55058 PLTP_HUMAN    | 0.28089905 | 0          |
| sp P08123 CO1A2_HUMAN   | 0.28119946 | 0.26737198 |
| sp P08708 RS17_HUMAN    | 0.28144264 | 0.21439649 |
| sp O75964 ATP5L_HUMAN   | 0.28146362 | 0.45033538 |
| sp Q06210-2 GFPT1_HUMAN | 0.28191948 | 0.6634523  |
| sp P39059 COFA1_HUMAN   | 0.28256416 | 0.06291623 |
| sp O14579 COPE_HUMAN    | 0.28272057 | 0.43103603 |
| sp P51911 CNN1_HUMAN    | 0.2827778  | 1.1054204  |
| sp O75489 NDUS3_HUMAN   | 0.28310776 | 0.35795313 |
| sp P26640 SYVC_HUMAN    | 0.28361893 | 0.44572112 |
| sp Q13630 FCL_HUMAN     | 0.28578568 | 0.35795313 |
| sp P30837 AL1B1_HUMAN   | 0.2908497  | 0.84879977 |
| sp P02461 CO3A1_HUMAN   | 0.29183388 | 0          |
| sp Q13885 TBB2A_HUMAN   | 0.2921772  | 0.656254   |
| sp Q02750 MP2K1_HUMAN   | 0.29278183 | 0          |
| sp P46459 NSF_HUMAN     | 0.29379272 | 0.09339783 |
| sp P22059 OSBP1_HUMAN   | 0.29489136 | 0.06291623 |
| sp Q13418 ILK_HUMAN     | 0.29777145 | 0.32654193 |
| sp P09493-5 TPM1_HUMAN  | 0.2980709  | 0.45033538 |
| sp P14866 HNRPL_HUMAN   | 0.29821968 | 0          |
| sp Q13547 HDAC1_HUMAN   | 0.29824066 | 0          |
| sp Q13435 SF3B2_HUMAN   | 0.29841423 | 0.19149946 |
| sp Q04446 GLGB_HUMAN    | 0.29878235 | 0.2591514  |
| sp P39023 RL3_HUMAN     | 0.29898643 | 0.19149946 |
| sp P54619-2 AAKG1_HUMAN | 0.2994213  | 0.19149946 |
| sp Q9C0C2-2 TB182_HUMAN | 0.3013668  | 0.25789237 |
| sp P40429 RL13A_HUMAN   | 0.30141068 | 0.7061832  |

|                         |            |            |
|-------------------------|------------|------------|
| sp P06681 CO2_HUMAN     | 0.30257034 | 0.68888646 |
| sp Q969V3-2 NCLN_HUMAN  | 0.30286217 | 0.5111962  |
| sp O95394-3 AGM1_HUMAN  | 0.30306625 | 0          |
| sp P49721 PSB2_HUMAN    | 0.3036213  | 0.656254   |
| sp P15374 UCLH3_HUMAN   | 0.30438805 | 0          |
| sp P26196 DDX6_HUMAN    | 0.3047905  | 0.2178309  |
| sp P49959-3 MRE11_HUMAN | 0.30516052 | 0.45033538 |
| sp Q96JB5-4 CK5P3_HUMAN | 0.3065281  | 0.06291623 |
| sp P09493-8 TPM1_HUMAN  | 0.30774307 | 0.7217418  |
| sp Q8TCJ2 STT3B_HUMAN   | 0.30889797 | 0.45033538 |
| sp Q99733-2 NP1L4_HUMAN | 0.30986214 | 0.7061832  |
| sp P46779-2 RL28_HUMAN  | 0.31196404 | 0.7827403  |
| sp P0DP03 HV335_HUMAN   | 0.31224823 | 1.1932944  |
| sp P31146 COR1A_HUMAN   | 0.31550598 | 1.1610394  |
| sp P62333 PRS10_HUMAN   | 0.3156662  | 0.43103603 |
| sp Q14847 LASP1_HUMAN   | 0.31800652 | 0.29066643 |
| sp P18085 ARF4_HUMAN    | 0.31827164 | 1.1932944  |
| sp P50135 HNMT_HUMAN    | 0.31863976 | 0          |
| sp P20810-10 ICAL_HUMAN | 0.31994057 | 0.5204253  |
| sp Q7Z3D6-3 GLUCM_HUMAN | 0.32012177 | 0          |
| sp Q9P2B2 FPRP_HUMAN    | 0.32089615 | 0.21439649 |
| sp P49841-2 GSK3B_HUMAN | 0.32151413 | 0.312067   |
| sp P13716-2 HEM2_HUMAN  | 0.3232994  | 0.8675019  |
| sp O60749-2 SNX2_HUMAN  | 0.3239193  | 0.41804093 |
| sp Q9NVA2 SEP11_HUMAN   | 0.32639885 | 0.86708647 |
| sp Q9NUV9 GIMA4_HUMAN   | 0.32798004 | 0.56808305 |
| sp P42226 STAT6_HUMAN   | 0.3289299  | 0.35795313 |
| sp P50914 RL14_HUMAN    | 0.32924843 | 0.7061832  |
| sp Q9NVD7 PARVA_HUMAN   | 0.3293476  | 1.2607617  |
| sp P05155-2 IC1_HUMAN   | 0.3317032  | 1.120602   |
| sp P08237-3 PFKAM_HUMAN | 0.33358192 | 0.1342476  |
| sp P11166 GTR1_HUMAN    | 0.33421707 | 1.1932944  |
| sp Q9H4M9 EHD1_HUMAN    | 0.33451462 | 0.63371044 |
| sp P36542-2 ATPG_HUMAN  | 0.33499432 | 0.656254   |
| sp P0CG38 POT1_HUMAN    | 0.33578873 | 0          |
| sp P48681 NEST_HUMAN    | 0.33594894 | 1.2435468  |
| sp Q9Y2Q3-3 GSTK1_HUMAN | 0.33605957 | 0.40256184 |
| sp P27816-2 MAP4_HUMAN  | 0.33747292 | 0          |
| sp P11586 C1TC_HUMAN    | 0.3394165  | 0.68888646 |
| sp P01624 KV315_HUMAN   | 0.34037018 | 1.1932944  |
| sp P60891 PRPS1_HUMAN   | 0.34109497 | 0.19149946 |
| sp Q9UNZ2-5 NSF1C_HUMAN | 0.3426094  | 1.0645995  |
| sp Q99584 S10AD_HUMAN   | 0.34304428 | 0.7827403  |
| sp Q9BS40 LXN_HUMAN     | 0.34340668 | 0          |
| sp O43488 ARK72_HUMAN   | 0.3452282  | 0.25789237 |

|                           |            |            |
|---------------------------|------------|------------|
| sp Q9BXN1 ASPN_HUMAN      | 0.34817123 | 1.2095301  |
| sp P01591 IGJ_HUMAN       | 0.35033607 | 0          |
| sp P31321 KAP1_HUMAN      | 0.3506508  | 0          |
| sp A0A0C4DH31 HV118_HUMAN | 0.35128403 | 0          |
| sp P62277 RS13_HUMAN      | 0.351511   | 0.19149946 |
| sp A0A0C4DH25 KVD20_HUMAN | 0.35276794 | 0.656254   |
| sp Q13976 KGP1_HUMAN      | 0.35443115 | 1.1240381  |
| sp P31946-2 1433B_HUMAN   | 0.35684204 | 0          |
| sp Q96EM0 T3HPD_HUMAN     | 0.35966873 | 0          |
| sp Q9NTK5 OLA1_HUMAN      | 0.3610382  | 0.7588735  |
| sp P62753 RS6_HUMAN       | 0.36270714 | 0.97209185 |
| sp P02753 RET4_HUMAN      | 0.36383438 | 0.7827403  |
| sp O94925-3 GLSK_HUMAN    | 0.36431694 | 0.45033538 |
| sp P02747 C1QC_HUMAN      | 0.36667252 | 0.45033538 |
| sp P35612-2 ADDB_HUMAN    | 0.3678589  | 0          |
| sp Q9Y4G6 TLN2_HUMAN      | 0.36842346 | 0.19149946 |
| sp Q9UHB9-4 SRP68_HUMAN   | 0.37118912 | 0.28516325 |
| sp O00233-2 PSMD9_HUMAN   | 0.374897   | 0          |
| sp Q6UW68 TM205_HUMAN     | 0.37563896 | 1.1932944  |
| sp A1L4H1 SRCRL_HUMAN     | 0.3769207  | 0.19149946 |
| sp P0C0L5 CO4B_HUMAN      | 0.3833351  | 0.656254   |
| sp Q96RF0-2 SNX18_HUMAN   | 0.38542175 | 0.7827403  |
| sp P51570-2 GALK1_HUMAN   | 0.38601494 | 0.45033538 |
| sp P41240 CSK_HUMAN       | 0.3868847  | 0.45033538 |
| sp Q8WU39 MZB1_HUMAN      | 0.38708115 | 1.1505735  |
| sp P00739-2 HPTR_HUMAN    | 0.3934536  | 1.3006523  |
| sp O14974-3 MYPT1_HUMAN   | 0.39671326 | 1.1240381  |
| sp P02746 C1QB_HUMAN      | 0.39683914 | 1.1932944  |
| sp Q13347 EIF3I_HUMAN     | 0.397295   | 1.1505735  |
| sp P54652 HSP72_HUMAN     | 0.3976593  | 0.656254   |
| sp P01743 HV146_HUMAN     | 0.3982334  | 0.7827403  |
| sp Q0ZGT2-4 NEXN_HUMAN    | 0.39832687 | 0.656254   |
| sp Q8TCS8 PNPT1_HUMAN     | 0.39937973 | 0.6070219  |
| sp Q3SY69 AL1L2_HUMAN     | 0.39947128 | 1.1932944  |
| sp O94804 STK10_HUMAN     | 0.39949036 | 0.656254   |
| sp P51692 STA5B_HUMAN     | 0.40053654 | 0.656254   |
| sp Q9NWV4 CZIB_HUMAN      | 0.4018135  | 0.19149946 |
| sp P07951-3 TPM2_HUMAN    | 0.40216064 | 1.0485198  |
| sp Q9BV20 MTNA_HUMAN      | 0.40229225 | 0.45033538 |
| sp P35813-3 PPM1A_HUMAN   | 0.40454865 | 0.656254   |
| sp P0DOX2 IGA2_HUMAN      | 0.40766144 | 0.7827403  |
| sp P08134 RHOC_HUMAN      | 0.41060257 | 0.45033538 |
| sp Q92629-2 SGCD_HUMAN    | 0.41332436 | 0.656254   |
| sp P06396 GELS_HUMAN      | 0.42172623 | 0.656254   |
| sp Q8WX93-5 PALLD_HUMAN   | 0.42388153 | 0.6828178  |

|                           |            |            |
|---------------------------|------------|------------|
| sp Q562R1 ACTBL_HUMAN     | 0.42864227 | 0.35795313 |
| sp O60488-2 ACSL4_HUMAN   | 0.42946815 | 0.656254   |
| sp Q00013-2 EM55_HUMAN    | 0.43194008 | 0.7827403  |
| sp P31513 FMO3_HUMAN      | 0.4336319  | 0.7827403  |
| sp P20338 RAB4A_HUMAN     | 0.44079208 | 0.656254   |
| sp P31947-2 1433S_HUMAN   | 0.44242096 | 0          |
| sp P12814-2 ACTN1_HUMAN   | 0.44337845 | 0.45033538 |
| sp P48426-2 PI42A_HUMAN   | 0.44906044 | 1.1932944  |
| sp P29692 EF1D_HUMAN      | 0.4495449  | 0.656254   |
| sp O43396 TXNL1_HUMAN     | 0.45003128 | 0.7827403  |
| sp P62851 RS25_HUMAN      | 0.45196915 | 1.1932944  |
| sp Q13200 PSMD2_HUMAN     | 0.47013283 | 0.35795313 |
| sp Q9UQ16-2 DYN3_HUMAN    | 0.4707489  | 0.656254   |
| sp O14791-2 APOL1_HUMAN   | 0.47918797 | 1.1932944  |
| sp P12931-2 SRC_HUMAN     | 0.48188782 | 0.312067   |
| sp P01834 IGKC_HUMAN      | 0.48706055 | 1.1932944  |
| sp P13746 1A11_HUMAN      | 0.49005127 | 1.1932944  |
| sp Q92599-2 SEPT8_HUMAN   | 0.49645805 | 0.6070219  |
| sp O43294 TGFI1_HUMAN     | 0.5017319  | 1.2095301  |
| sp P62244 RS15A_HUMAN     | 0.5030651  | 1.1932944  |
| sp P14324 FPPS_HUMAN      | 0.5036049  | 1.1932944  |
| sp P62633-3 CNBP_HUMAN    | 0.5131035  | 1.1932944  |
| sp P55083-2 MFAP4_HUMAN   | 0.5272312  | 0.7827403  |
| sp P50238 CRIP1_HUMAN     | 0.5277977  | 0.7827403  |
| sp O00560-2 SDCB1_HUMAN   | 0.5313816  | 0.45033538 |
| sp Q9BZQ8 NIBAN_HUMAN     | 0.5377636  | 0.7588735  |
| sp P48741 HSP77_HUMAN     | 0.5377655  | 0.656254   |
| sp P19012-2 K1C15_HUMAN   | 0.5450287  | 0.656254   |
| sp O94875-11 SRBS2_HUMAN  | 0.5538597  | 0.656254   |
| sp P05090 APOD_HUMAN      | 0.63890076 | 1.1505735  |
| sp P79483 DRB3_HUMAN      | 0.6720352  | 0.656254   |
| sp P01619 KV320_HUMAN     | 0.685482   | 0.656254   |
| sp Q14194-2 DPYL1_HUMAN   | 0.6965256  | 0.656254   |
| sp Q9UNS2 CSN3_HUMAN      | 0.69868755 | 0.656254   |
| sp Q05682-4 CALD1_HUMAN   | 0.70895386 | 0.656254   |
| sp P35637-2 FUS_HUMAN     | 0.71324444 | 0.45033538 |
| sp P30443 1A01_HUMAN      | 0.9847717  | 1.1932944  |
| sp P08779 K1C16_HUMAN     | 0.99220085 | 0.656254   |
| sp A0A075B6P5 KV228_HUMAN | 1.0091572  | 0.656254   |
| sp Q04695 K1C17_HUMAN     | 1.0334282  | 0.656254   |
| sp P35542 SAA4_HUMAN      | 1.1694069  | 1.1932944  |
| sp Q9H6R3 ACSS3_HUMAN     | 1.6629009  | 0.45033538 |
| sp Q9TQE0 2B19_HUMAN      | 2.7001724  | 0.656254   |
