# Supplementary material for: Peptidylarginine deiminase 2 citrullinates MZB1 and promotes the secretion of IgM and IgA
Source: PubMed Central journal article supplement (PMC10716219; doi:10.3389/fimmu.2023.1290585), 2023-11-29
Supplement: DataSheet_8.pdf [file DataSheet_8.pdf]

## Supplemental Table 8: IPF2 vs controls

| Accession #             | Fold Change | p value (-log10) |
|-------------------------|-------------|------------------|
| sp Q15109-10 RAGE_HUMAN | -1.7256279  | 2.1818786        |
| sp P13760 2B14_HUMAN    | -1.2917519  | 1.6960104        |
| sp P22748 CAH4_HUMAN    | -1.1331406  | 2.6576471        |
| sp P12429 ANXA3_HUMAN   | -1.1135616  | 7.665951         |
| sp P02788 TRFL_HUMAN    | -1.0902653  | 14.612167        |
| sp P59665 DEF1_HUMAN    | -1.086132   | 2.1818786        |
| sp P05164-3 PERM_HUMAN  | -1.0112572  | 11.224656        |
| sp P24158 PRTN3_HUMAN   | -0.9918919  | 1.4104178        |
| sp P62805 H4_HUMAN      | -0.9647751  | 6.3204336        |
| sp P49913 CAMP_HUMAN    | -0.9553032  | 1.6960104        |
| sp P05109 S10A8_HUMAN   | -0.9161873  | 3.5908275        |
| sp P28799-3 GRN_HUMAN   | -0.9088364  | 1.6960104        |
| sp P08473 NEP_HUMAN     | -0.8945522  | 1.6960104        |
| sp P61626 LYSC_HUMAN    | -0.8684483  | 2.6576471        |
| sp P12821-2 ACE_HUMAN   | -0.756012   | 2.6576471        |
| sp Q9NZA1-2 CLIC5_HUMAN | -0.7497425  | 3.5908275        |
| sp Q01469 FABP5_HUMAN   | -0.7307911  | 4.051346         |
| sp P13686 PPA5_HUMAN    | -0.7250938  | 1.6960104        |
| sp P08311 CATG_HUMAN    | -0.7188339  | 4.051346         |
| sp P33121-3 ACSL1_HUMAN | -0.7165508  | 2.1818786        |
| sp P20160 CAP7_HUMAN    | -0.7151642  | 1.6960104        |
| sp P80188 NGAL_HUMAN    | -0.7100925  | 3.1266599        |
| sp P01011 AACT_HUMAN    | -0.6720238  | 8.062322         |
| sp Q10589-2 BST2_HUMAN  | -0.6703453  | 1.6960104        |
| sp Q9Y624 JAM1_HUMAN    | -0.6591282  | 2.6576471        |
| sp P50895 BCAM_HUMAN    | -0.6583881  | 6.614138         |
| sp P05107 ITB2_HUMAN    | -0.6550903  | 4.3153405        |
| sp P41218 MNDA_HUMAN    | -0.6545639  | 2.1818786        |
| sp P06702 S10A9_HUMAN   | -0.6513081  | 3.5908275        |
| sp P07339 CATD_HUMAN    | -0.647377   | 7.556109         |
| sp Q08722-2 CD47_HUMAN  | -0.6399117  | 1.6960104        |
| sp P35241 RADI_HUMAN    | -0.6261978  | 3.5908275        |
| sp Q9HB40 RISC_HUMAN    | -0.6249676  | 1.6960104        |
| sp P31949 S10AB_HUMAN   | -0.622303   | 2.6576471        |
| sp P09467 F16P1_HUMAN   | -0.6203499  | 5.338249         |
| sp Q9UGT4 SUSD2_HUMAN   | -0.6191273  | 2.9310203        |
| sp O15400-2 STX7_HUMAN  | -0.6105537  | 1.6997428        |
| sp P02786 TFR1_HUMAN    | -0.602993   | 4.051346         |
| sp P26447 S10A4_HUMAN   | -0.59585    | 2.6576471        |
| sp Q02218-2 ODO1_HUMAN  | -0.5951948  | 4.051346         |
| sp P17213 BPI_HUMAN     | -0.5940933  | 2.1818786        |
| sp Q13740-2 CD166_HUMAN | -0.5887718  | 4.964395         |
| sp O95810 CAVN2_HUMAN   | -0.5867577  | 3.8875895        |

|                         |            |            |
|-------------------------|------------|------------|
| sp P61106 RAB14_HUMAN   | -0.5724449 | 4.6186957  |
| sp O00159-3 MYO1C_HUMAN | -0.5696297 | 7.5025163  |
| sp P55290-4 CAD13_HUMAN | -0.5688648 | 1.9647322  |
| sp P05362 ICAM1_HUMAN   | -0.5599136 | 5.869831   |
| sp P48735-2 IDHP_HUMAN  | -0.5597343 | 4.051346   |
| sp P60903 S10AA_HUMAN   | -0.5577927 | 1.6960104  |
| sp P18428 LBP_HUMAN     | -0.5432129 | 1.6960104  |
| sp P30512 1A29_HUMAN    | -0.5414009 | 1.6960104  |
| sp P02750 A2GL_HUMAN    | -0.5298786 | 3.1266599  |
| sp Q86VB7-2 C163A_HUMAN | -0.5298538 | 8.461897   |
| sp Q9UHG3 PCYOX_HUMAN   | -0.5223026 | 5.869831   |
| sp P51149 RAB7A_HUMAN   | -0.5150337 | 4.7039127  |
| sp P43304 GPDM_HUMAN    | -0.5018482 | 3.5908275  |
| sp Q6NZI2 CAVN1_HUMAN   | -0.5017586 | 5.2874084  |
| sp P11233 RALA_HUMAN    | -0.4967766 | 2.1818786  |
| sp Q9H0U4 RAB1B_HUMAN   | -0.4911404 | 1.6960104  |
| sp P49756 RBM25_HUMAN   | -0.4866924 | 1.6960104  |
| sp P04083 ANXA1_HUMAN   | -0.482254  | 8.788385   |
| sp P16671-4 CD36_HUMAN  | -0.4664345 | 2.1818786  |
| sp Q02318 CP27A_HUMAN   | -0.4642639 | 1.6960104  |
| sp P84103-2 SRSF3_HUMAN | -0.4634495 | 1.9413493  |
| sp O96009 NAPSA_HUMAN   | -0.4551907 | 2.6576471  |
| sp P51148-2 RAB5C_HUMAN | -0.4532757 | 1.6960104  |
| sp Q8N335 GPD1L_HUMAN   | -0.4524803 | 1.6960104  |
| sp P21397 AOFA_HUMAN    | -0.452034  | 5.2991114  |
| sp P09668 CATH_HUMAN    | -0.449564  | 4.051346   |
| sp Q9UL25 RAB21_HUMAN   | -0.4485207 | 2.6576471  |
| sp Q13510-2 ASAHI_HUMAN | -0.446228  | 6.3204336  |
| sp Q15907-2 RB11B_HUMAN | -0.4461498 | 3.5908275  |
| sp P49407-2 ARRB1_HUMAN | -0.4421082 | 2.6576471  |
| sp P05091 ALDH2_HUMAN   | -0.4404621 | 11.4588375 |
| sp Q03135 CAV1_HUMAN    | -0.439415  | 2.1818786  |
| sp P04179-4 SODM_HUMAN  | -0.4362774 | 3.1266599  |
| sp Q9NZN4 EHD2_HUMAN    | -0.434248  | 7.568668   |
| sp Q8WWI1-5 LMO7_HUMAN  | -0.4316025 | 4.0772076  |
| sp Q14152 EIF3A_HUMAN   | -0.4182596 | 1.6960104  |
| sp P27105 STOM_HUMAN    | -0.4175072 | 4.964395   |
| sp P50148 GNAQ_HUMAN    | -0.4168739 | 2.1818786  |
| sp P52790 HXK3_HUMAN    | -0.4167614 | 2.6576471  |
| sp Q13451 FKBP5_HUMAN   | -0.4161224 | 2.3979244  |
| sp P07910-2 HNRPC_HUMAN | -0.4157391 | 1.9647322  |
| sp Q07157 ZO1_HUMAN     | -0.4149551 | 4.789934   |
| sp P14780 MMP9_HUMAN    | -0.4136486 | 2.768635   |
| sp P09758 TACD2_HUMAN   | -0.4130325 | 2.1818786  |
| sp O15247 CLIC2_HUMAN   | -0.4112949 | 2.9807727  |

|                         |            |           |
|-------------------------|------------|-----------|
| sp P09622 DLDH_HUMAN    | -0.4094753 | 3.8058946 |
| sp P07355-2 ANXA2_HUMAN | -0.4086952 | 4.247887  |
| sp P08758 ANXA5_HUMAN   | -0.4069061 | 9.697888  |
| sp P16284-3 PECA1_HUMAN | -0.4043922 | 5.3137383 |
| sp P09525 ANXA4_HUMAN   | -0.3923779 | 6.3667836 |
| sp Q96TA1-2 NIBL1_HUMAN | -0.3910923 | 3.4656596 |
| sp P22307-8 NLTP_HUMAN  | -0.3891945 | 1.6960104 |
| sp O75695 XRP2_HUMAN    | -0.3874474 | 1.6960104 |
| sp Q14344 GNA13_HUMAN   | -0.3853264 | 1.6604291 |
| sp P09601 HMOX1_HUMAN   | -0.3826771 | 1.3815327 |
| sp Q6PIU2-2 NCEH1_HUMAN | -0.3822441 | 2.6997027 |
| sp P36543-2 VATE1_HUMAN | -0.3811817 | 1.6960104 |
| sp Q86Y82 STX12_HUMAN   | -0.3741388 | 2.6576471 |
| sp P05141 ADT2_HUMAN    | -0.3727665 | 2.6576471 |
| sp Q6P4A8 PLBL1_HUMAN   | -0.3720665 | 2.1818786 |
| sp A6NMZ7 CO6A6_HUMAN   | -0.3601131 | 3.364204  |
| sp P60953 CDC42_HUMAN   | -0.3596115 | 3.1266599 |
| sp P61421 VA0D1_HUMAN   | -0.3570557 | 3.4656596 |
| sp P20292 AL5AP_HUMAN   | -0.3556423 | 1.6960104 |
| sp P62987 RL40_HUMAN    | -0.3548241 | 1.8444856 |
| sp P30711 GSTT1_HUMAN   | -0.3541927 | 1.6960104 |
| sp P23786 CPT2_HUMAN    | -0.3540115 | 1.3815327 |
| sp Q13228-4 SBP1_HUMAN  | -0.3524017 | 11.411416 |
| sp P00167-2 CYB5_HUMAN  | -0.3512821 | 1.5646582 |
| sp Q9H4M9 EHD1_HUMAN    | -0.3494434 | 3.1208909 |
| sp P11413-2 G6PD_HUMAN  | -0.3465729 | 4.033051  |
| sp O95994 AGR2_HUMAN    | -0.3452816 | 2.6576471 |
| sp P51659 DHB4_HUMAN    | -0.3424549 | 12.043698 |
| sp P04080 CYTB_HUMAN    | -0.3418655 | 1.6960104 |
| sp Q9H223 EHD4_HUMAN    | -0.3387985 | 4.051346  |
| sp O75955 FLOT1_HUMAN   | -0.3385468 | 4.964395  |
| sp P11215-2 ITAM_HUMAN  | -0.3368759 | 3.9417877 |
| sp P20340-2 RAB6A_HUMAN | -0.336443  | 3.9417877 |
| sp P36957 ODO2_HUMAN    | -0.3356056 | 4.509013  |
| sp P0DP25 CALM3_HUMAN   | -0.3346577 | 3.342776  |
| sp P06737-2 PYGL_HUMAN  | -0.3341904 | 4.984084  |
| sp P47897 SYQ_HUMAN     | -0.33354   | 1.8444856 |
| sp Q99536 VAT1_HUMAN    | -0.33214   | 3.6087239 |
| sp P08571 CD14_HUMAN    | -0.3320236 | 2.1818786 |
| sp Q9NYL9 TMOD3_HUMAN   | -0.3317699 | 2.1818786 |
| sp P01009 A1AT_HUMAN    | -0.3310165 | 7.629475  |
| sp P62258 1433E_HUMAN   | -0.3281994 | 2.1818786 |
| sp Q7Z406 MYH14_HUMAN   | -0.3263702 | 8.664913  |
| sp Q14254 FLOT2_HUMAN   | -0.3255634 | 3.1266599 |
| sp P51648-2 AL3A2_HUMAN | -0.32411   | 2.56956   |

|                         |            |           |
|-------------------------|------------|-----------|
| sp P61604 CH10_HUMAN    | -0.3238106 | 3.1266599 |
| sp Q9Y696 CLIC4_HUMAN   | -0.3236885 | 1.6295799 |
| sp O43760-2 SNG2_HUMAN  | -0.3228951 | 1.6960104 |
| sp O15230 LAMA5_HUMAN   | -0.3220711 | 6.478972  |
| sp P15586-2 GNS_HUMAN   | -0.3220329 | 1.6960104 |
| sp P10301 RRAS_HUMAN    | -0.3171806 | 1.6960104 |
| sp P13987-2 CD59_HUMAN  | -0.3139648 | 1.6960104 |
| sp P05026-2 AT1B1_HUMAN | -0.3132649 | 2.2323174 |
| sp Q9NP72 RAB18_HUMAN   | -0.31213   | 2.1818786 |
| sp P14543-2 NID1_HUMAN  | -0.3086853 | 5.888033  |
| sp Q92817 EVPL_HUMAN    | -0.3063088 | 4.461395  |
| sp P09110 THIK_HUMAN    | -0.3050613 | 2.1818786 |
| sp Q04760-2 LGUL_HUMAN  | -0.3044758 | 1.9647322 |
| sp O60437 PEPL_HUMAN    | -0.3036041 | 13.481833 |
| sp P10809 CH60_HUMAN    | -0.3033466 | 7.5463896 |
| sp O00571-2 DDX3X_HUMAN | -0.301508  | 1.6960104 |
| sp Q16698-2 DECR_HUMAN  | -0.2976704 | 4.033051  |
| sp P62820 RAB1A_HUMAN   | -0.2963791 | 1.9647322 |
| sp P26440 IVD_HUMAN     | -0.295887  | 1.6960104 |
| sp Q16881-2 TRXR1_HUMAN | -0.2932472 | 3.5705152 |
| sp Q15599-2 NHRF2_HUMAN | -0.2920933 | 2.3979244 |
| sp P05556 ITB1_HUMAN    | -0.291729  | 8.448556  |
| sp P20073-2 ANXA7_HUMAN | -0.2915325 | 2.653196  |
| sp P43490 NAMPT_HUMAN   | -0.2864723 | 6.521583  |
| sp Q6NUK1-2 SCMC1_HUMAN | -0.2856922 | 2.4829872 |
| sp Q9NTX5-6 ECHD1_HUMAN | -0.2851448 | 2.36833   |
| sp P55268 LAMB2_HUMAN   | -0.2850113 | 9.150676  |
| sp P17844-2 DDX5_HUMAN  | -0.2839851 | 3.5190198 |
| sp P09960 LKHA4_HUMAN   | -0.2836151 | 7.2164545 |
| sp P62495-2 ERF1_HUMAN  | -0.2835741 | 1.6960104 |
| sp P50995-2 ANX11_HUMAN | -0.2834034 | 2.997126  |
| sp P17931 LEG3_HUMAN    | -0.2828884 | 2.6576471 |
| sp P63092-3 GNAS2_HUMAN | -0.2823277 | 1.6295799 |
| sp Q9UBQ0-2 VPS29_HUMAN | -0.2806435 | 1.6960104 |
| sp P10253 LYAG_HUMAN    | -0.2789974 | 1.827201  |
| sp P51688 SPHM_HUMAN    | -0.2770653 | 2.1818786 |
| sp P61019 RAB2A_HUMAN   | -0.2763958 | 3.1627245 |
| sp Q02252-2 MMSA_HUMAN  | -0.2763901 | 1.3635377 |
| sp Q6YHK3 CD109_HUMAN   | -0.2759857 | 4.033051  |
| sp Q27J81-2 INF2_HUMAN  | -0.2752781 | 1.6960104 |
| sp P54886-2 P5CS_HUMAN  | -0.2738628 | 1.4104178 |
| sp Q01130-2 SRSF2_HUMAN | -0.2720127 | 1.6960104 |
| sp Q00325-2 MPCP_HUMAN  | -0.2700386 | 3.1266599 |
| sp O14980 XPO1_HUMAN    | -0.2700291 | 1.6960104 |
| sp P00403 COX2_HUMAN    | -0.2680492 | 1.7590232 |

|                         |            |           |
|-------------------------|------------|-----------|
| sp P23381 SYWC_HUMAN    | -0.2676868 | 4.7413087 |
| sp Q96RQ3 MCCA_HUMAN    | -0.2671375 | 1.7590232 |
| sp P11177-3 ODPB_HUMAN  | -0.2636738 | 1.5983955 |
| sp Q16630-2 CPSF6_HUMAN | -0.2626495 | 1.6960104 |
| sp Q96I99 SUCB2_HUMAN   | -0.2622376 | 4.172964  |
| sp Q9HDC9 APMAP_HUMAN   | -0.2585583 | 4.5526023 |
| sp Q9BXS5-2 AP1M1_HUMAN | -0.2585068 | 2.1818786 |
| sp Q8WUM4 PDC6I_HUMAN   | -0.2557392 | 3.903645  |
| sp P07942 LAMB1_HUMAN   | -0.2554445 | 6.57691   |
| sp Q99439 CNN2_HUMAN    | -0.253582  | 1.8444856 |
| sp P16278-2 BGAL_HUMAN  | -0.253542  | 2.6576471 |
| sp P30740 ILEU_HUMAN    | -0.2479076 | 2.5461748 |
| sp P50570-2 DYN2_HUMAN  | -0.2477169 | 1.9413493 |
| sp P20645 MPRD_HUMAN    | -0.2466297 | 1.6960104 |
| sp P08754 GNAI3_HUMAN   | -0.2456474 | 1.7590232 |
| sp P11047 LAMC1_HUMAN   | -0.2438641 | 5.2853217 |
| sp P07686 HEXB_HUMAN    | -0.2436714 | 1.827201  |
| sp Q99715-4 COCA1_HUMAN | -0.2423439 | 1.6960104 |
| sp P99999 CYC_HUMAN     | -0.2423248 | 1.9647322 |
| sp Q8NBX0 SCPDL_HUMAN   | -0.240778  | 1.4104178 |
| sp P30040 ERP29_HUMAN   | -0.238348  | 2.3047035 |
| sp P61204 ARF3_HUMAN    | -0.2373276 | 1.9951487 |
| sp P42330 AK1C3_HUMAN   | -0.2369413 | 2.5461748 |
| sp P37837 TALDO_HUMAN   | -0.2366867 | 5.6821094 |
| sp P04632 CPNS1_HUMAN   | -0.2333822 | 2.4723146 |
| sp P49327 FAS_HUMAN     | -0.2314682 | 5.371087  |
| sp P00352 AL1A1_HUMAN   | -0.2312241 | 7.6453085 |
| sp P62873 GBB1_HUMAN    | -0.2304211 | 2.044628  |
| sp P35237 SPB6_HUMAN    | -0.2301884 | 4.6038065 |
| sp P04066 FUCO_HUMAN    | -0.2295513 | 1.6960104 |
| sp P02743 SAMP_HUMAN    | -0.2271156 | 1.6265627 |
| sp P21796 VDAC1_HUMAN   | -0.2257156 | 3.658668  |
| sp O75874 IDHC_HUMAN    | -0.2232895 | 3.1516862 |
| sp P30626-2 SORCN_HUMAN | -0.2224789 | 2.2385595 |
| sp Q9UBV8 PEF1_HUMAN    | -0.2217217 | 1.6960104 |
| sp P35270 SPRE_HUMAN    | -0.2206287 | 1.4278674 |
| sp P42765 THIM_HUMAN    | -0.2206059 | 4.834172  |
| sp Q16853 AOC3_HUMAN    | -0.219223  | 4.0218377 |
| sp P0DMV9 HS71B_HUMAN   | -0.2179794 | 3.5779264 |
| sp P11310-2 ACADM_HUMAN | -0.2161274 | 3.218121  |
| sp Q9NQC3 RTN4_HUMAN    | -0.2137947 | 1.5646582 |
| sp Q9UFN0 NPS3A_HUMAN   | -0.2134247 | 1.4104178 |
| sp P84090 ERH_HUMAN     | -0.2116985 | 2.1818786 |
| sp O00264 PGRC1_HUMAN   | -0.2105198 | 2.0727112 |
| sp P08621-3 RU17_HUMAN  | -0.2059002 | 1.9951487 |

|                         |            |           |
|-------------------------|------------|-----------|
| sp Q04917 1433F_HUMAN   | -0.205204  | 4.611947  |
| sp Q13011 ECH1_HUMAN    | -0.203249  | 4.044672  |
| sp P61970 NTF2_HUMAN    | -0.2018204 | 1.4104178 |
| sp P56199 ITA1_HUMAN    | -0.2015724 | 4.1295223 |
| sp P05023 AT1A1_HUMAN   | -0.1998196 | 6.057522  |
| sp Q16363-2 LAMA4_HUMAN | -0.199688  | 2.8787436 |
| sp Q14118 DAG1_HUMAN    | -0.1993675 | 1.4104178 |
| sp P21281 VATB2_HUMAN   | -0.1972427 | 3.218121  |
| sp P54920 SNA4_HUMAN    | -0.1971836 | 3.1629772 |
| sp Q00765 REEP5_HUMAN   | -0.1956463 | 3.1266599 |
| sp P06576 ATPB_HUMAN    | -0.1949883 | 4.9429183 |
| sp P59998 ARPC4_HUMAN   | -0.1938248 | 2.3143692 |
| sp Q92542 NICA_HUMAN    | -0.1933289 | 1.4104178 |
| sp Q01082 SPTB2_HUMAN   | -0.1895866 | 14.374806 |
| sp P04040 CATA_HUMAN    | -0.1880341 | 6.8146358 |
| sp O15031 PLXB2_HUMAN   | -0.1864014 | 2.7155995 |
| sp P38606 VATA_HUMAN    | -0.1859074 | 2.8451047 |
| sp P49755 TMEDA_HUMAN   | -0.1838064 | 1.7590232 |
| sp P06733 ENOA_HUMAN    | -0.1832981 | 1.3454111 |
| sp P43121 MUC18_HUMAN   | -0.1827107 | 3.316884  |
| sp P29401-2 TKT_HUMAN   | -0.1823311 | 7.6846213 |
| sp P09497-2 CLCB_HUMAN  | -0.1809406 | 1.9647322 |
| sp P49961-6 ENTP1_HUMAN | -0.180521  | 1.4104178 |
| sp P24752 THIL_HUMAN    | -0.1797218 | 2.0740998 |
| sp P46939-2 UTRO_HUMAN  | -0.1790505 | 3.3572266 |
| sp P19971 TYPH_HUMAN    | -0.178997  | 4.339341  |
| sp P35221 CTNA1_HUMAN   | -0.1780167 | 6.2760777 |
| sp P13804 ETFA_HUMAN    | -0.1768112 | 2.845279  |
| sp O00764-2 PDXK_HUMAN  | -0.1746101 | 3.1266599 |
| sp P62993 GRB2_HUMAN    | -0.1740894 | 1.4050349 |
| sp P51572-2 BAP31_HUMAN | -0.173645  | 1.515701  |
| sp Q9Y277-2 VDAC3_HUMAN | -0.1723862 | 1.3957126 |
| sp P38646 GRP75_HUMAN   | -0.171669  | 3.9272358 |
| sp O75348 VATG1_HUMAN   | -0.1716251 | 1.6960104 |
| sp P25789 PSA4_HUMAN    | -0.1670742 | 3.671968  |
| sp P49748-2 ACADV_HUMAN | -0.1667252 | 4.8317146 |
| sp P50213 IDH3A_HUMAN   | -0.1646729 | 1.6092666 |
| sp P07954-2 FUMH_HUMAN  | -0.1627808 | 1.4278674 |
| sp P35579 MYH9_HUMAN    | -0.1614037 | 9.9857025 |
| sp P50552 VASP_HUMAN    | -0.1589184 | 2.1800864 |
| sp Q9UPN3 MACF1_HUMAN   | -0.1577759 | 2.9337258 |
| sp P23634-8 AT2B4_HUMAN | -0.1571121 | 1.4351699 |
| sp Q99729-3 ROAA_HUMAN  | -0.1566277 | 1.4548165 |
| sp Q9Y224 RTRAF_HUMAN   | -0.1559868 | 1.6997428 |
| sp Q14112-2 NID2_HUMAN  | -0.1552677 | 1.8087089 |

|                          |            |           |
|--------------------------|------------|-----------|
| sp Q02818 NUCB1_HUMAN    | -0.1545677 | 2.2535503 |
| sp O95831-3 AIFM1_HUMAN  | -0.1539974 | 1.8842831 |
| sp Q08945 SSRP1_HUMAN    | -0.1538162 | 2.3143692 |
| sp P35232 PHB_HUMAN      | -0.1537247 | 2.8793902 |
| sp Q9NZ08-2 ERAP1_HUMAN  | -0.1537247 | 2.544769  |
| sp P23141-2 EST1_HUMAN   | -0.1518459 | 5.832636  |
| sp P27824-2 CALX_HUMAN   | -0.151516  | 2.400925  |
| sp O60234 GMFG_HUMAN     | -0.1506901 | 1.6960104 |
| sp O75390 CISY_HUMAN     | -0.1499577 | 1.8842831 |
| sp Q6UWY5 OLFL1_HUMAN    | -0.1494217 | 1.4564189 |
| sp Q15417 CNN3_HUMAN     | -0.1488609 | 1.4104178 |
| sp O43813 LANC1_HUMAN    | -0.1451626 | 1.4104178 |
| sp Q9ULA0 DNPEP_HUMAN    | -0.1445732 | 3.0139608 |
| sp Q9BSJ8-2 ESYT1_HUMAN  | -0.1440144 | 4.3259945 |
| sp P09382 LEG1_HUMAN     | -0.1435814 | 3.364204  |
| sp Q9NRN5-2 OLFL3_HUMAN  | -0.1423779 | 2.817951  |
| sp Q16658 FSCN1_HUMAN    | -0.14118   | 2.6947098 |
| sp P07988 PSPB_HUMAN     | -0.1408291 | 1.5983955 |
| sp P16435 NCPR_HUMAN     | -0.1407766 | 1.9076298 |
| sp Q03252 LMNB2_HUMAN    | -0.1400757 | 5.6768107 |
| sp P08575-10 PTPRC_HUMAN | -0.1399841 | 1.4936475 |
| sp Q06830 PRDX1_HUMAN    | -0.1396637 | 2.2243123 |
| sp P30520 PURA2_HUMAN    | -0.1390762 | 1.827201  |
| sp P52209-2 6PGD_HUMAN   | -0.1364975 | 1.6613601 |
| sp P04275 VWF_HUMAN      | -0.13554   | 2.2135153 |
| sp Q99623 PHB2_HUMAN     | -0.1335564 | 1.4068714 |
| sp P08572 CO4A2_HUMAN    | -0.1331673 | 1.7451575 |
| sp Q9HCC0 MCCB_HUMAN     | -0.1323891 | 2.1800864 |
| sp P54819-2 KAD2_HUMAN   | -0.1272316 | 1.4104178 |
| sp Q99460 PSMD1_HUMAN    | -0.1252823 | 1.3908802 |
| sp P35914 HMGCL_HUMAN    | -0.1235848 | 1.6997428 |
| sp P40926 MDHM_HUMAN     | -0.1230812 | 3.3269932 |
| sp P52907 CAZA1_HUMAN    | -0.1210232 | 1.4351699 |
| sp P13073 COX41_HUMAN    | -0.1168461 | 1.4104178 |
| sp P35580-3 MYH10_HUMAN  | -0.1133843 | 6.249163  |
| sp P00390-2 GSHR_HUMAN   | -0.1132965 | 1.7713763 |
| sp P00505 AATM_HUMAN     | -0.1114922 | 3.15452   |
| sp P07099 HYEP_HUMAN     | -0.1074944 | 1.5294853 |
| sp P60900 PSA6_HUMAN     | -0.1056862 | 1.8087089 |
| sp P13489 RINI_HUMAN     | -0.1056404 | 2.330168  |
| sp P05198 IF2A_HUMAN     | -0.1053829 | 1.3815327 |
| sp P48643 TCPE_HUMAN     | -0.1052704 | 1.9819717 |
| sp P13796 PLSL_HUMAN     | -0.1050262 | 3.8791635 |
| sp Q96HE7 ERO1A_HUMAN    | -0.1045837 | 1.4104178 |
| sp P21980 TGM2_HUMAN     | -0.1040154 | 2.6854048 |

|                         |            |           |
|-------------------------|------------|-----------|
| sp P04004 VTNC_HUMAN    | -0.1029739 | 2.3979244 |
| sp Q9UL46 PSME2_HUMAN   | -0.1029148 | 1.6997428 |
| sp Q00839 HNRPU_HUMAN   | -0.1012993 | 1.3379446 |
| sp P41250 GARS_HUMAN    | -0.1006136 | 1.4564189 |
| sp Q07954 LRP1_HUMAN    | -0.1005592 | 3.646963  |
| sp Q06323 PSME1_HUMAN   | -0.0996857 | 1.5270832 |
| sp Q9UHQ9 NB5R1_HUMAN   | -0.0961533 | 1.3815327 |
| sp Q9UIJ7 KAD3_HUMAN    | -0.0938187 | 2.058973  |
| sp P61158 ARP3_HUMAN    | -0.0936184 | 1.3801578 |
| sp O15144 ARPC2_HUMAN   | -0.0926895 | 1.4050349 |
| sp P17655 CAN2_HUMAN    | -0.0888519 | 2.3202872 |
| sp P20700 LMNB1_HUMAN   | -0.0876827 | 2.7836905 |
| sp P08729 K2C7_HUMAN    | -0.0860157 | 1.7871698 |
| sp Q08257 QOR_HUMAN     | -0.0844765 | 1.5071542 |
| sp O60504-2 VINEX_HUMAN | -0.0815887 | 1.560883  |
| sp O14818 PSA7_HUMAN    | -0.0758934 | 1.8842831 |
| sp Q9BUJ2-4 HNRL1_HUMAN | -0.0745888 | 1.3668759 |
| sp Q9Y490 TLN1_HUMAN    | -0.0707417 | 2.8255475 |
| sp P55072 TERA_HUMAN    | -0.0654717 | 1.7263757 |
| sp P08133 ANXA6_HUMAN   | -0.0611286 | 1.3304803 |
| sp P60842 IF4A1_HUMAN   | -0.0567532 | 1.3481187 |
| sp P19338 NUCL_HUMAN    | -0.0540772 | 1.5096362 |
| sp P02545 LMNA_HUMAN    | -0.0539246 | 2.5078812 |
| sp P12109 CO6A1_HUMAN   | -0.0438404 | 1.4875728 |
| sp P11021 BIP_HUMAN     | -0.0427666 | 1.3693259 |
| sp Q07065 CKAP4_HUMAN   | 0.06452751 | 1.8029867 |
| sp Q99497 PARK7_HUMAN   | 0.06971359 | 1.560883  |
| sp O00567 NOP56_HUMAN   | 0.06984139 | 1.515701  |
| sp P02549-2 SPTA1_HUMAN | 0.07066727 | 1.6728406 |
| sp P30101 PDIA3_HUMAN   | 0.07391357 | 2.0547411 |
| sp P35606 COPB2_HUMAN   | 0.08586502 | 3.068567  |
| sp P09972 ALDOC_HUMAN   | 0.09036446 | 1.4278674 |
| sp Q92900-2 RENT1_HUMAN | 0.09292221 | 1.3184075 |
| sp P04843 RPN1_HUMAN    | 0.09348106 | 1.7921138 |
| sp P18206-2 VINC_HUMAN  | 0.09399796 | 6.316927  |
| sp P49257 LMAN1_HUMAN   | 0.10253525 | 1.5567774 |
| sp P04075 ALDOA_HUMAN   | 0.10853195 | 2.3661125 |
| sp P31040 SDHA_HUMAN    | 0.1091156  | 1.3559021 |
| sp P23284 PPIB_HUMAN    | 0.11219978 | 3.5844223 |
| sp P27348 1433T_HUMAN   | 0.11577797 | 1.436011  |
| sp P40939 ECHA_HUMAN    | 0.11669159 | 1.4881507 |
| sp P49419-2 AL7A1_HUMAN | 0.11795425 | 1.7404958 |
| sp P31943 HNRH1_HUMAN   | 0.12033463 | 1.5054473 |
| sp Q13263 TIF1B_HUMAN   | 0.12540436 | 1.6797456 |
| sp P05156 CFAI_HUMAN    | 0.12926865 | 1.4936475 |



|                         |            |           |
|-------------------------|------------|-----------|
| sp Q96G03 PGM2_HUMAN    | 0.1305542  | 2.0598862 |
| sp Q12906-4 ILF3_HUMAN  | 0.13311386 | 3.26026   |
| sp P67936 TPM4_HUMAN    | 0.1367321  | 2.1377194 |
| sp O75083 WDR1_HUMAN    | 0.14050102 | 2.4186769 |
| sp P04844 RPN2_HUMAN    | 0.14097786 | 3.0251918 |
| sp O15372 EIF3H_HUMAN   | 0.14101791 | 1.6960104 |
| sp Q15075 EEA1_HUMAN    | 0.14233398 | 2.015472  |
| sp O94776 MTA2_HUMAN    | 0.14594841 | 1.5646582 |
| sp P23526 SAHH_HUMAN    | 0.14605522 | 1.3503746 |
| sp Q9Y315 DEOC_HUMAN    | 0.14617729 | 1.5646582 |
| sp Q86VP6 CAND1_HUMAN   | 0.14670944 | 1.6891338 |
| sp P11766 ADHX_HUMAN    | 0.14783859 | 3.0495367 |
| sp P62316-2 SMD2_HUMAN  | 0.14912033 | 1.6960104 |
| sp O60884 DNJA2_HUMAN   | 0.14958382 | 1.3815327 |
| sp P02774-3 VTDB_HUMAN  | 0.14971733 | 3.2431045 |
| sp P13798 ACPH_HUMAN    | 0.15115356 | 2.747965  |
| sp Q15942 ZYX_HUMAN     | 0.15135002 | 1.8444856 |
| sp P08727 K1C19_HUMAN   | 0.1533699  | 2.6788433 |
| sp Q9UBT2 SAE2_HUMAN    | 0.1630249  | 1.9647322 |
| sp Q9HCB6 SPON1_HUMAN   | 0.16519356 | 1.3635377 |
| sp Q8IZ83-3 A16A1_HUMAN | 0.167099   | 3.3703115 |
| sp P13645 K1C10_HUMAN   | 0.17503357 | 2.5292609 |
| sp O00534 VMA5A_HUMAN   | 0.17681313 | 1.6295799 |
| sp P25311 ZA2G_HUMAN    | 0.17969513 | 3.1693146 |
| sp P08670 VIME_HUMAN    | 0.17995453 | 8.414972  |
| sp P14625 ENPL_HUMAN    | 0.18278503 | 5.598441  |
| sp P11277-2 SPTB1_HUMAN | 0.18607903 | 4.0486217 |
| sp P32119 PRDX2_HUMAN   | 0.186903   | 4.056798  |
| sp Q15582 BGH3_HUMAN    | 0.18848038 | 2.4678369 |
| sp P98095-2 FBLN2_HUMAN | 0.18944931 | 1.800942  |
| sp P55084 ECHB_HUMAN    | 0.19316673 | 2.3305986 |
| sp Q16643-3 DREB_HUMAN  | 0.19510078 | 1.4716977 |
| sp Q14847 LASP1_HUMAN   | 0.19893646 | 1.6832623 |
| sp P02790 HEMO_HUMAN    | 0.19935799 | 3.729114  |
| sp P06681-3 CO2_HUMAN   | 0.2007389  | 2.3143692 |
| sp P80303-2 NUCB2_HUMAN | 0.20617867 | 2.1818786 |
| sp Q0ZGT2-4 NEXN_HUMAN  | 0.2084961  | 2.923088  |
| sp Q5TDH0-3 DDI2_HUMAN  | 0.2179985  | 1.4104178 |
| sp Q8IUX7 AEBP1_HUMAN   | 0.22303009 | 1.4050349 |
| sp Q92896-2 GSLG1_HUMAN | 0.22632027 | 4.051346  |
| sp P36955 PEDF_HUMAN    | 0.22869301 | 2.3143692 |
| sp P15090 FABP4_HUMAN   | 0.23130417 | 2.36833   |
| sp P10909-5 CLUS_HUMAN  | 0.23461723 | 4.534284  |
| sp P02042 HBD_HUMAN     | 0.24206161 | 2.3979244 |
| sp P01008 ANT3_HUMAN    | 0.24249268 | 4.937407  |

|                         |            |            |
|-------------------------|------------|------------|
| sp P28331-2 NDUS1_HUMAN | 0.24377632 | 1.560883   |
| sp P35555 FBN1_HUMAN    | 0.24386978 | 8.268259   |
| sp P23219-2 PGH1_HUMAN  | 0.24842453 | 1.9647322  |
| sp P09493-9 TPM1_HUMAN  | 0.25156212 | 1.6960104  |
| sp Q15746-2 MYLK_HUMAN  | 0.25204086 | 3.26026    |
| sp Q9UBG0 MRC2_HUMAN    | 0.25398064 | 1.8595492  |
| sp Q9NZU5-2 LMCD1_HUMAN | 0.25655937 | 1.8060131  |
| sp P13671 CO6_HUMAN     | 0.25896835 | 1.4104178  |
| sp O14558 HSPB6_HUMAN   | 0.2592678  | 1.4278674  |
| sp Q16181-2 SEPT7_HUMAN | 0.26430702 | 4.6295204  |
| sp P23946 CMA1_HUMAN    | 0.2674675  | 1.6997428  |
| sp Q14019 COTL1_HUMAN   | 0.26768875 | 2.6576471  |
| sp P62753 RS6_HUMAN     | 0.2694168  | 1.6960104  |
| sp P13667 PDIA4_HUMAN   | 0.27235413 | 8.084617   |
| sp P10643 CO7_HUMAN     | 0.27420807 | 3.1015959  |
| sp P04196 HRG_HUMAN     | 0.27703857 | 3.2925725  |
| sp P05783 K1C18_HUMAN   | 0.27786255 | 6.68389    |
| sp P07951 TPM2_HUMAN    | 0.28624153 | 1.3080103  |
| sp P03952 KLKB1_HUMAN   | 0.28657532 | 2.1818786  |
| sp P08708 RS17_HUMAN    | 0.29084015 | 2.3143692  |
| sp P51911 CNN1_HUMAN    | 0.2914276  | 2.3787699  |
| sp P00450 CERU_HUMAN    | 0.29290962 | 7.740138   |
| sp P09493-8 TPM1_HUMAN  | 0.2933178  | 2.7624686  |
| sp A1L4H1 SRCRL_HUMAN   | 0.29749107 | 1.6960104  |
| sp Q15124 PGM5_HUMAN    | 0.29950714 | 7.01345    |
| sp P13611 CSPG2_HUMAN   | 0.3089695  | 4.393969   |
| sp P36578 RL4_HUMAN     | 0.3185768  | 3.5908275  |
| sp P08123 CO1A2_HUMAN   | 0.33423042 | 1.6997428  |
| sp P62241 RS8_HUMAN     | 0.33778954 | 2.8384566  |
| sp P22105-1 TENX_HUMAN  | 0.3393097  | 10.5570965 |
| sp P04792 HSPB1_HUMAN   | 0.34099197 | 6.5900383  |
| sp P00488 F13A_HUMAN    | 0.34155083 | 4.984084   |
| sp Q93052 LPP_HUMAN     | 0.34933662 | 3.5945017  |
| sp Q9BXN1 ASPN_HUMAN    | 0.3520527  | 2.6576471  |
| sp Q9NYL4 FKB11_HUMAN   | 0.35588074 | 1.4104178  |
| sp Q12805-2 FBLN3_HUMAN | 0.35663795 | 4.80653    |
| sp P67936-2 TPM4_HUMAN  | 0.35853577 | 1.6960104  |
| sp P21291 CSRP1_HUMAN   | 0.3588333  | 5.417897   |
| sp Q12765 SCRN1_HUMAN   | 0.35939598 | 2.1818786  |
| sp P00751 CFAB_HUMAN    | 0.36118126 | 8.874068   |
| sp P68871 HBB_HUMAN     | 0.36701584 | 2.838374   |
| sp P27169 PON1_HUMAN    | 0.36768723 | 1.6960104  |
| sp Q14195-2 DPYL3_HUMAN | 0.36808968 | 7.605871   |
| sp P00918 CAH2_HUMAN    | 0.3697834  | 4.509013   |
| sp Q9P2B2 FPRP_HUMAN    | 0.3741417  | 3.1266599  |

|                         |            |           |
|-------------------------|------------|-----------|
| sp P00734 THRB_HUMAN    | 0.37493515 | 4.017758  |
| sp P07585 PGS2_HUMAN    | 0.37509537 | 4.2870226 |
| sp P06727 APOA4_HUMAN   | 0.3801632  | 4.865345  |
| sp P35749 MYH11_HUMAN   | 0.38070107 | 14.436076 |
| sp P01042-2 KNG1_HUMAN  | 0.38121414 | 5.938259  |
| sp Q96C86 DCPS_HUMAN    | 0.39722633 | 1.6960104 |
| sp Q8N2S1 LTBP4_HUMAN   | 0.39870453 | 4.0486217 |
| sp P01833 PIGR_HUMAN    | 0.4012413  | 4.964395  |
| sp P15088 CBPA3_HUMAN   | 0.4054451  | 2.1818786 |
| sp Q9P2E9 RRBP1_HUMAN   | 0.4067669  | 12.329277 |
| sp P04114 APOB_HUMAN    | 0.40989685 | 10.952644 |
| sp P69905 HBA_HUMAN     | 0.41264343 | 3.316884  |
| sp P07738 PMGE_HUMAN    | 0.41810226 | 2.1818786 |
| sp P05787-2 K2C8_HUMAN  | 0.42713928 | 10.888629 |
| sp P19827 ITIH1_HUMAN   | 0.42729187 | 4.80653   |
| sp P02452 CO1A1_HUMAN   | 0.43024635 | 2.058973  |
| sp P24844 MYL9_HUMAN    | 0.4360485  | 1.6960104 |
| sp P62266 RS23_HUMAN    | 0.44197464 | 2.6576471 |
| sp O00151 PDLI1_HUMAN   | 0.44431114 | 2.400925  |
| sp Q9UBX5 FBLN5_HUMAN   | 0.4636593  | 4.033051  |
| sp Q9NR12-2 PDLI7_HUMAN | 0.4684143  | 2.1800864 |
| sp Q8WU39 MZB1_HUMAN    | 0.47790527 | 2.3047035 |
| sp Q13162 PRDX4_HUMAN   | 0.47974014 | 2.432837  |
| sp P49821-2 NDUV1_HUMAN | 0.4839363  | 2.441399  |
| sp P29622 KAIN_HUMAN    | 0.4841652  | 2.6576471 |
| sp P01031 CO5_HUMAN     | 0.48708344 | 2.753709  |
| sp P02671 FIBA_HUMAN    | 0.49538994 | 8.574463  |
| sp Q9UMS6-2 SYNP2_HUMAN | 0.4996872  | 2.9310203 |
| sp P00748 FA12_HUMAN    | 0.5012665  | 1.6960104 |
| sp P07451 CAH3_HUMAN    | 0.50237274 | 1.827201  |
| sp Q14315-2 FLNC_HUMAN  | 0.5033512  | 14.539617 |
| sp P00915 CAH1_HUMAN    | 0.5163994  | 5.7298145 |
| sp Q14767 LTBP2_HUMAN   | 0.5288372  | 4.3492994 |
| sp Q8TDL5 BPIB1_HUMAN   | 0.53274536 | 2.044628  |
| sp Q01995 TAGL_HUMAN    | 0.53463936 | 7.8047314 |
| sp P02675 FIBB_HUMAN    | 0.5466118  | 9.180728  |
| sp Q14192 FHL2_HUMAN    | 0.54758453 | 2.1818786 |
| sp P05546 HEP2_HUMAN    | 0.55908203 | 2.6576471 |
| sp P19823 ITIH2_HUMAN   | 0.5642929  | 5.417897  |
| sp P46779-2 RL28_HUMAN  | 0.5662422  | 2.1818786 |
| sp P02679-2 FIBG_HUMAN  | 0.57214546 | 6.2420893 |
| sp P17661 DESM_HUMAN    | 0.577261   | 14.808462 |
| sp Q8NBS9 TXND5_HUMAN   | 0.5908718  | 7.665951  |
| sp P04259 K2C6B_HUMAN   | 0.6235943  | 2.1818786 |
| sp P23456 Trypsin       | 0.64588165 | 3.4656596 |

|                         |            |           |
|-------------------------|------------|-----------|
| sp P04003 C4BPA_HUMAN   | 0.65763474 | 5.869831  |
| sp P13647 K2C5_HUMAN    | 0.6654587  | 6.7698927 |
| sp P02647 APOA1_HUMAN   | 0.6998539  | 12.519223 |
| sp P00747 PLMN_HUMAN    | 0.7055321  | 6.7698927 |
| sp P0DOX5 IGG1_HUMAN    | 0.8013725  | 4.367871  |
| sp P0DOY3 IGLC3_HUMAN   | 0.8267708  | 2.1818786 |
| sp Q05707 COEA1_HUMAN   | 0.9431114  | 15.25562  |
| sp P0DOX8 IGL1_HUMAN    | 0.9557438  | 2.1818786 |
| sp P02652-2 APOA2_HUMAN | 1.0050583  | 2.058973  |
| sp P01859 IGHG2_HUMAN   | 1.0217228  | 4.4116287 |
| sp P01876 IGHA1_HUMAN   | 1.0276661  | 4.509013  |
| sp P04264 K2C1_HUMAN    | 1.0650234  | 12.332273 |
| sp P01860 IGHG3_HUMAN   | 1.3390617  | 2.6576471 |
| sp P01871-2 IGHM_HUMAN  | 1.3807735  | 2.1818786 |
| sp P35527 K1C9_HUMAN    | 1.4763031  | 5.728786  |
| sp P01861 IGHG4_HUMAN   | 1.5504074  | 3.5908275 |
| sp P04229 2B11_HUMAN    | -3.0598888 | 0.656254  |
| sp P08246 ELNE_HUMAN    | -1.7198162 | 1.1932944 |
| sp P08263 GSTA1_HUMAN   | -1.5163345 | 0         |
| sp P54108-2 CRIS3_HUMAN | -1.4643812 | 0.656254  |
| sp Q29963 1C06_HUMAN    | -1.4123783 | 0.656254  |
| sp P02741 CRP_HUMAN     | -1.2031498 | 1.1932944 |
| sp Q03135-2 CAV1_HUMAN  | -1.1924057 | 0.656254  |
| sp P13761 2B17_HUMAN    | -1.1225281 | 0         |
| sp Q9HD89 RETN_HUMAN    | -1.0432739 | 1.1932944 |
| sp Q16777 H2A2C_HUMAN   | -0.9454651 | 1.1932944 |
| sp P37235 HPCL1_HUMAN   | -0.8826199 | 0.656254  |
| sp Q9BW04 SARG_HUMAN    | -0.8154545 | 1.1932944 |
| sp P62745 RHOB_HUMAN    | -0.7995548 | 0.656254  |
| sp O00757 F16P2_HUMAN   | -0.7635078 | 1.1932944 |
| sp Q93077 H2A1C_HUMAN   | -0.7275238 | 1.1932944 |
| sp Q9UHN6-2 CEIP2_HUMAN | -0.7262268 | 1.1932944 |
| sp P22894 MMP8_HUMAN    | -0.7195606 | 1.1932944 |
| sp P38159 RBMX_HUMAN    | -0.7003403 | 0.656254  |
| sp Q14956-2 GPNMB_HUMAN | -0.6956101 | 1.1932944 |
| sp P33151 CADH5_HUMAN   | -0.6946182 | 1.1932944 |
| sp Q13751 LAMB3_HUMAN   | -0.6778717 | 1.2773042 |
| sp P28330 ACADL_HUMAN   | -0.6626072 | 1.1932944 |
| sp P28676 GRAN_HUMAN    | -0.6601563 | 1.1932944 |
| sp P06703 S10A6_HUMAN   | -0.6211567 | 1.1932944 |
| sp Q8NC51-3 PAIRB_HUMAN | -0.6205502 | 0.7827403 |
| sp P20702 ITAX_HUMAN    | -0.5988541 | 0.656254  |
| sp Q01518 CAP1_HUMAN    | -0.5727549 | 0.656254  |
| sp Q15286 RAB35_HUMAN   | -0.5663471 | 0.656254  |
| sp O00186 STXB3_HUMAN   | -0.5506477 | 1.1932944 |

|                         |            |            |
|-------------------------|------------|------------|
| sp P16403 H12_HUMAN     | -0.5427036 | 0.656254   |
| sp Q9NVJ2 ARL8B_HUMAN   | -0.5405426 | 1.1932944  |
| sp A6NMY6 AXA2L_HUMAN   | -0.5333309 | 0.656254   |
| sp P16930 FAAA_HUMAN    | -0.5313835 | 0.656254   |
| sp P63218 GBG5_HUMAN    | -0.5306377 | 1.1932944  |
| sp Q01955 CO4A3_HUMAN   | -0.5259914 | 1.1932944  |
| sp P78417-3 GSTO1_HUMAN | -0.5100975 | 1.1932944  |
| sp Q9P2J5-2 SYLC_HUMAN  | -0.5088043 | 1.1932944  |
| sp Q15056-2 IF4H_HUMAN  | -0.504097  | 1.1932944  |
| sp O95716 RAB3D_HUMAN   | -0.5033312 | 0.656254   |
| sp P16422 EPCAM_HUMAN   | -0.5014916 | 1.1932944  |
| sp O00592-2 PODXL_HUMAN | -0.4967194 | 1.1932944  |
| sp A5A3E0 POTEF_HUMAN   | -0.4952145 | 0.656254   |
| sp P51636-2 CAV2_HUMAN  | -0.482214  | 1.1932944  |
| sp Q9UDY2-3 ZO2_HUMAN   | -0.4803429 | 1.1932944  |
| sp Q30154 DRB5_HUMAN    | -0.4785252 | 0.656254   |
| sp P62070-4 RRAS2_HUMAN | -0.4752884 | 0.656254   |
| sp Q14011-2 CIRBP_HUMAN | -0.474905  | 1.2773042  |
| sp P51153 RAB13_HUMAN   | -0.4657555 | 0.656254   |
| sp O76041-2 NEBL_HUMAN  | -0.4624901 | 0.656254   |
| sp Q8NBQ5 DHB11_HUMAN   | -0.4612865 | 1.1932944  |
| sp P61601 NCALD_HUMAN   | -0.4600029 | 0.656254   |
| sp P08631-2 HCK_HUMAN   | -0.4444637 | 0.656254   |
| sp Q6DN03 H2B2C_HUMAN   | -0.4299011 | 1.1932944  |
| sp Q9NPY3 C1QR1_HUMAN   | -0.4288006 | 1.1932944  |
| sp Q9Y376 CAB39_HUMAN   | -0.4248447 | 1.2773042  |
| sp P61006 RAB8A_HUMAN   | -0.4236908 | 1.1932944  |
| sp Q9Y4G6 TLN2_HUMAN    | -0.4214706 | 0.656254   |
| sp P12830 CADH1_HUMAN   | -0.4199619 | 1.1932944  |
| sp P12236 ADT3_HUMAN    | -0.4179115 | 1.1932944  |
| sp P11717 MPRI_HUMAN    | -0.4165268 | 1.1932944  |
| sp P61586 RHOA_HUMAN    | -0.4154186 | 1.1932944  |
| sp O60271-4 JIP4_HUMAN  | -0.4153996 | 0.35795313 |
| sp Q9H2U2-3 IPYR2_HUMAN | -0.4145241 | 0.656254   |
| sp Q9NPJ3 ACO13_HUMAN   | -0.4141102 | 1.1932944  |
| sp P61224 RAP1B_HUMAN   | -0.4116221 | 0          |
| sp O95837 GNA14_HUMAN   | -0.407938  | 0.656254   |
| sp P15153 RAC2_HUMAN    | -0.407177  | 0.656254   |
| sp P07948-2 LYN_HUMAN   | -0.4029503 | 1.1932944  |
| sp P12694 ODBA_HUMAN    | -0.4028282 | 0.7061832  |
| sp P06753-6 TPM3_HUMAN  | -0.3999577 | 0.656254   |
| sp P29992 GNA11_HUMAN   | -0.3929691 | 1.1932944  |
| sp Q13283 G3BP1_HUMAN   | -0.3912773 | 0.6070219  |
| sp P48059-3 LIMS1_HUMAN | -0.3903294 | 0.656254   |
| sp P62314 SMD1_HUMAN    | -0.3854885 | 1.1932944  |

|                         |            |            |
|-------------------------|------------|------------|
| sp Q9Y3D6 FIS1_HUMAN    | -0.384923  | 0.7061832  |
| sp Q96BM9 ARL8A_HUMAN   | -0.3777542 | 0.656254   |
| sp P30049 ATPD_HUMAN    | -0.3768444 | 1.1932944  |
| sp P21589-2 5NTD_HUMAN  | -0.3725128 | 1.1932944  |
| sp Q9H8L6 MMRN2_HUMAN   | -0.3720627 | 0.7827403  |
| sp P15559-2 NQO1_HUMAN  | -0.3715496 | 1.1932944  |
| sp P13928 ANXA8_HUMAN   | -0.3600941 | 0.7827403  |
| sp P06239-3 LCK_HUMAN   | -0.356844  | 0.656254   |
| sp P62834 RAP1A_HUMAN   | -0.352623  | 0.656254   |
| sp P30533 AMRP_HUMAN    | -0.3519211 | 0.09339783 |
| sp P57088 TMM33_HUMAN   | -0.3489761 | 1.1932944  |
| sp O14786 NRP1_HUMAN    | -0.3486109 | 1.1932944  |
| sp P01112 RASH_HUMAN    | -0.3461838 | 0.656254   |
| sp P36542-2 ATPG_HUMAN  | -0.3439999 | 0.656254   |
| sp P08962-2 CD63_HUMAN  | -0.3435535 | 0.7827403  |
| sp P01111 RASN_HUMAN    | -0.3403816 | 0.656254   |
| sp P24557-2 THAS_HUMAN  | -0.3358383 | 1.1932944  |
| sp Q9BZF9-2 UACA_HUMAN  | -0.3349495 | 0.7827403  |
| sp Q12846 STX4_HUMAN    | -0.3321304 | 0.656254   |
| sp Q9H8H3 MET7A_HUMAN   | -0.3317375 | 1.1505735  |
| sp Q96S97 MYADM_HUMAN   | -0.3264542 | 1.1932944  |
| sp Q9UBW8 CSN7A_HUMAN   | -0.3236198 | 0.91601294 |
| sp P48509 CD151_HUMAN   | -0.322464  | 1.1932944  |
| sp Q07812-7 BAX_HUMAN   | -0.3190117 | 1.1932944  |
| sp Q07075 AMPE_HUMAN    | -0.3174992 | 1.2095301  |
| sp P11234-2 RALB_HUMAN  | -0.3141403 | 0.656254   |
| sp O95197-2 RTN3_HUMAN  | -0.304512  | 1.1932944  |
| sp Q8NDH3 PEPL1_HUMAN   | -0.3025169 | 1.0485198  |
| sp Q15149-9 PLEC_HUMAN  | -0.3016481 | 0.656254   |
| sp P02462 CO4A1_HUMAN   | -0.3006611 | 0.7061832  |
| sp Q96HD1 CREL1_HUMAN   | -0.3004036 | 1.1932944  |
| sp O94811 TPPP_HUMAN    | -0.2958365 | 0.45033538 |
| sp P52789 HXK2_HUMAN    | -0.2953949 | 0.656254   |
| sp O43615 TIM44_HUMAN   | -0.2921124 | 0.7827403  |
| sp Q14515-2 SPRL1_HUMAN | -0.2899771 | 1.1932944  |
| sp Q86W92-2 LIPB1_HUMAN | -0.2894392 | 1.1932944  |
| sp P52788-2 SPSY_HUMAN  | -0.2874718 | 0.7827403  |
| sp Q5SSJ5-2 HP1B3_HUMAN | -0.2865028 | 0.8983557  |
| sp O60814 H2B1K_HUMAN   | -0.2863846 | 0.7061832  |
| sp O00712-4 NFIB_HUMAN  | -0.2835388 | 0.656254   |
| sp O43795-2 MYO1B_HUMAN | -0.2829037 | 1.1932944  |
| sp P23193-2 TCEA1_HUMAN | -0.2812386 | 0.7061832  |
| sp Q16822 PCKGM_HUMAN   | -0.2809849 | 1.1932944  |
| sp P42566 EPS15_HUMAN   | -0.2787018 | 1.1932944  |
| sp P08134 RHOC_HUMAN    | -0.2785902 | 0.7827403  |

|                         |            |            |
|-------------------------|------------|------------|
| sp Q08170 SRSF4_HUMAN   | -0.2778091 | 0.656254   |
| sp Q9Y2Q5 LTOR2_HUMAN   | -0.2776508 | 1.1932944  |
| sp Q9UPQ0 LIMC1_HUMAN   | -0.2769775 | 1.120602   |
| sp Q9H2G2-2 SLK_HUMAN   | -0.2762775 | 0.7827403  |
| sp P51606-2 REBP_HUMAN  | -0.2751961 | 1.1932944  |
| sp Q13813-2 SPTN1_HUMAN | -0.2749023 | 1.1932944  |
| sp Q9NUB1-2 ACS2L_HUMAN | -0.2740765 | 0.45033538 |
| sp Q8TCD5 NT5C_HUMAN    | -0.2731609 | 0.7827403  |
| sp Q13404 UB2V1_HUMAN   | -0.2727032 | 0.04707252 |
| sp Q14651 PLSI_HUMAN    | -0.272152  | 0          |
| sp Q6YN16 HSDL2_HUMAN   | -0.2716103 | 1.2773042  |
| sp P29972-2 AQP1_HUMAN  | -0.2711754 | 1.1932944  |
| sp P11279 LAMP1_HUMAN   | -0.2710266 | 0.45033538 |
| sp O94919 ENDD1_HUMAN   | -0.2687855 | 0.7827403  |
| sp P63261 ACTG_HUMAN    | -0.2655945 | 0          |
| sp P31946 1433B_HUMAN   | -0.2634182 | 0.656254   |
| sp Q9GZP4-2 PITH1_HUMAN | -0.2613125 | 1.1932944  |
| sp Q9NUJ1-3 ABHDA_HUMAN | -0.260025  | 1.1932944  |
| sp P11387 TOP1_HUMAN    | -0.259861  | 0.7827403  |
| sp Q9NVD7 PARVA_HUMAN   | -0.2593308 | 0.19149946 |
| sp Q9UBR2 CATZ_HUMAN    | -0.2586784 | 1.1932944  |
| sp P04839 CY24B_HUMAN   | -0.2576122 | 0.19149946 |
| sp Q9UUK9 NUDT5_HUMAN   | -0.2567864 | 0.7827403  |
| sp P42126-2 ECI1_HUMAN  | -0.2567253 | 1.1932944  |
| sp Q15323 K1H1_HUMAN    | -0.2559462 | 0.656254   |
| sp Q92930 RAB8B_HUMAN   | -0.2556419 | 0.656254   |
| sp P13284 GILT_HUMAN    | -0.2553797 | 1.2773042  |
| sp Q562R1 ACTBL_HUMAN   | -0.2538471 | 0          |
| sp Q8NF37 PCAT1_HUMAN   | -0.253109  | 1.120602   |
| sp P30048-2 PRDX3_HUMAN | -0.2496662 | 0.7498006  |
| sp Q9C0B1 FTO_HUMAN     | -0.2477236 | 1.1932944  |
| sp P51553-2 IDH3G_HUMAN | -0.2452965 | 1.1932944  |
| sp Q15819 UB2V2_HUMAN   | -0.2452622 | 0.656254   |
| sp P0DJ18 SAA1_HUMAN    | -0.2428761 | 0.45033538 |
| sp Q6ZVM7-3 TM1L2_HUMAN | -0.2428722 | 0.45033538 |
| sp P06753-2 TPM3_HUMAN  | -0.2421112 | 1.1932944  |
| sp Q7LG56-6 RIR2B_HUMAN | -0.2419567 | 1.1932944  |
| sp Q14108 SCRB2_HUMAN   | -0.2416592 | 0.7827403  |
| sp P55327-3 TPD52_HUMAN | -0.2416115 | 1.1932944  |
| sp P25774 CATS_HUMAN    | -0.2387981 | 0.5204253  |
| sp P02763 A1AG1_HUMAN   | -0.2374077 | 1.2773042  |
| sp P36542 ATPG_HUMAN    | -0.2372322 | 0.656254   |
| sp O75323 NIPS2_HUMAN   | -0.2370224 | 1.1932944  |
| sp Q6NY19-2 KANK3_HUMAN | -0.2367497 | 0.7827403  |
| sp P10619-2 PPGB_HUMAN  | -0.2339306 | 0.6070219  |

|                          |            |            |
|--------------------------|------------|------------|
| sp P24666 PPAC_HUMAN     | -0.2335548 | 0.7827403  |
| sp P67809 YBOX1_HUMAN    | -0.2331009 | 0.45033538 |
| sp Q96EP5-2 DAZP1_HUMAN  | -0.2328987 | 0.45033538 |
| sp P10412 H14_HUMAN      | -0.2313881 | 0          |
| sp Q9BZE9-2 ASPC1_HUMAN  | -0.2296782 | 0.656254   |
| sp P0CG39 POTEJ_HUMAN    | -0.2292748 | 0          |
| sp P20339-2 RAB5A_HUMAN  | -0.229003  | 0.656254   |
| sp Q53T59 H1BP3_HUMAN    | -0.2289305 | 1.1932944  |
| sp Q7L5N1 CSN6_HUMAN     | -0.2266197 | 0.19149946 |
| sp Q9P1F3 ABRAL_HUMAN    | -0.2255697 | 0          |
| sp P47985 UCRI_HUMAN     | -0.224083  | 0.7061832  |
| sp Q10567-2 AP1B1_HUMAN  | -0.2234669 | 1.1505735  |
| sp P06396-2 GELS_HUMAN   | -0.2233028 | 0.656254   |
| sp P07305-2 H10_HUMAN    | -0.2232704 | 0.28516325 |
| sp O00231-2 PSD11_HUMAN  | -0.2223816 | 1.2095301  |
| sp Q9NTK5 OLA1_HUMAN     | -0.22159   | 0.19149946 |
| sp Q86TX2 ACOT1_HUMAN    | -0.2185097 | 0.656254   |
| sp P30838 AL3A1_HUMAN    | -0.2178421 | 0.45033538 |
| sp Q15181 IPYR_HUMAN     | -0.2177277 | 1.0485198  |
| sp P84243 H33_HUMAN      | -0.2175808 | 0          |
| sp P61020 RAB5B_HUMAN    | -0.2166672 | 1.1505735  |
| sp P02769 ALBU_BOVIN     | -0.2162476 | 0.02012722 |
| sp P23497 SP100_HUMAN    | -0.2160912 | 1.1932944  |
| sp Q9ULZ3-2 ASC_HUMAN    | -0.2149239 | 1.1932944  |
| sp P08648 ITA5_HUMAN     | -0.2147923 | 1.0301651  |
| sp Q7L2H7 EIF3M_HUMAN    | -0.2147064 | 0.656254   |
| sp P60709 ACTB_HUMAN     | -0.2145882 | 0          |
| sp P30044-2 PRDX5_HUMAN  | -0.2105808 | 0.656254   |
| sp P61225 RAP2B_HUMAN    | -0.210247  | 1.1932944  |
| sp Q9GZT8 NIF3L_HUMAN    | -0.2100315 | 1.1932944  |
| sp Q08209-5 PP2BA_HUMAN  | -0.2074432 | 0.45033538 |
| sp P31937 3HIDH_HUMAN    | -0.2025414 | 0.91601294 |
| sp P09493-5 TPM1_HUMAN   | -0.2025185 | 1.1932944  |
| sp O95833 CLIC3_HUMAN    | -0.198225  | 1.2773042  |
| sp P31939 PUR9_HUMAN     | -0.1975594 | 1.2326616  |
| sp O15173-2 PGRC2_HUMAN  | -0.1974373 | 0.6298893  |
| sp Q7L1Q6-2 BZW1_HUMAN   | -0.1969137 | 0.7061832  |
| sp P30419-2 NMT1_HUMAN   | -0.1966572 | 0.656254   |
| sp Q32MZ4-3 LRRF1_HUMAN  | -0.1957684 | 0.45033538 |
| sp O60716-14 CTND1_HUMAN | -0.1956043 | 0.91601294 |
| sp P25685-2 DNJB1_HUMAN  | -0.1945915 | 1.1932944  |
| sp Q9NNW7 TRXR2_HUMAN    | -0.1945286 | 0.6298893  |
| sp Q53GQ0 DHB12_HUMAN    | -0.1941586 | 0.7061832  |
| sp Q04837 SSBP_HUMAN     | -0.1940289 | 0.7827403  |
| sp P61088 UBE2N_HUMAN    | -0.1940136 | 0.45033538 |



|                         |            |            |
|-------------------------|------------|------------|
| sp O15067 PUR4_HUMAN    | -0.1932373 | 1.1932944  |
| sp Q9NYF8-2 BCLF1_HUMAN | -0.192234  | 1.1932944  |
| sp P53396-2 ACLY_HUMAN  | -0.1921501 | 1.1025577  |
| sp P30084 ECHM_HUMAN    | -0.1919403 | 1.3006523  |
| sp P62937 PIIA_HUMAN    | -0.1890793 | 0.7061832  |
| sp P35754 GLRX1_HUMAN   | -0.1874809 | 1.3006523  |
| sp P06865 HEXA_HUMAN    | -0.1869659 | 0.80804527 |
| sp P61457 PHS_HUMAN     | -0.186511  | 0.19149946 |
| sp Q15833-2 STXB2_HUMAN | -0.1862087 | 0.19149946 |
| sp O43175 SERA_HUMAN    | -0.1860256 | 1.0241117  |
| sp P48163-2 MAOX_HUMAN  | -0.185894  | 1.1505735  |
| sp O75131 CPNE3_HUMAN   | -0.1854191 | 0.897507   |
| sp Q13867 BLMH_HUMAN    | -0.1851311 | 1.1932944  |
| sp P26368-2 U2AF2_HUMAN | -0.1846075 | 1.1932944  |
| sp P68371 TBB4B_HUMAN   | -0.1845017 | 0.19149946 |
| sp P50225 ST1A1_HUMAN   | -0.1841164 | 1.1505735  |
| sp P62995-3 TRA2B_HUMAN | -0.183712  | 1.1932944  |
| sp P84095 RHOG_HUMAN    | -0.1830769 | 0.91601294 |
| sp P40121 CAPG_HUMAN    | -0.1824074 | 0.30819008 |
| sp P04222 1C03_HUMAN    | -0.1791878 | 0          |
| sp P36551 HEM6_HUMAN    | -0.1785717 | 0.19149946 |
| sp P49593-2 PPM1F_HUMAN | -0.1779547 | 1.0485198  |
| sp P07741 APT_HUMAN     | -0.1757946 | 0.8059303  |
| sp Q99436 PSB7_HUMAN    | -0.1757498 | 0.45033538 |
| sp Q16762 THTR_HUMAN    | -0.1750088 | 0.21439649 |
| sp O15511 ARPC5_HUMAN   | -0.1729717 | 0.8983557  |
| sp P61026 RAB10_HUMAN   | -0.1729202 | 1.1932944  |
| sp P09917 LOX5_HUMAN    | -0.172287  | 1.0634323  |
| sp P60033 CD81_HUMAN    | -0.1719818 | 0.7827403  |
| sp O00391 QSOX1_HUMAN   | -0.1717758 | 1.1932944  |
| sp P56134-3 ATPK_HUMAN  | -0.1717033 | 0          |
| sp P12111-2 CO6A3_HUMAN | -0.1703224 | 1.1240381  |
| sp Q9UBC2-2 EP15R_HUMAN | -0.1680908 | 0.7827403  |
| sp P31946-2 1433B_HUMAN | -0.1676331 | 0.656254   |
| sp P50452 SPB8_HUMAN    | -0.1668949 | 1.1932944  |
| sp P62879 GBB2_HUMAN    | -0.1647854 | 0.7588735  |
| sp O75367-2 H2AY_HUMAN  | -0.1626644 | 1.2392054  |
| sp Q8IV08 PLD3_HUMAN    | -0.161993  | 0.5204253  |
| sp P55060-3 XPO2_HUMAN  | -0.1612835 | 0.84879977 |
| sp O14773 TPP1_HUMAN    | -0.160223  | 0.40256184 |
| sp Q9HB71 CYBP_HUMAN    | -0.1595707 | 0.312067   |
| sp Q9Y281 COF2_HUMAN    | -0.1594696 | 0.91601294 |
| sp Q16629-2 SRSF7_HUMAN | -0.1591911 | 0.5111962  |
| sp Q6NVY1 HIBCH_HUMAN   | -0.1587086 | 1.0485198  |
| sp P25788-2 PSA3_HUMAN  | -0.157753  | 0.84879977 |

|                         |            |            |
|-------------------------|------------|------------|
| sp Q9H9B4 SFXN1_HUMAN   | -0.1575737 | 0.19149946 |
| sp P42285 MTREX_HUMAN   | -0.1561384 | 0.45033538 |
| sp P04440 DPB1_HUMAN    | -0.1560478 | 1.1932944  |
| sp P12235 ADT1_HUMAN    | -0.1559105 | 0.656254   |
| sp P09429 HMGB1_HUMAN   | -0.1552124 | 0.7827403  |
| sp Q05315 LEG10_HUMAN   | -0.1535254 | 0          |
| sp P62826 RAN_HUMAN     | -0.1533928 | 0.87291557 |
| sp O75923-11 DYSF_HUMAN | -0.1524048 | 0          |
| sp P63010-2 AP2B1_HUMAN | -0.1521912 | 0.9533461  |
| sp Q6DKJ4 NXN_HUMAN     | -0.1517677 | 0.19149946 |
| sp Q93084-2 AT2A3_HUMAN | -0.150959  | 0.45033538 |
| sp Q9NZ32 ARP10_HUMAN   | -0.1504917 | 1.1932944  |
| sp Q5K4L6 S27A3_HUMAN   | -0.1503773 | 0.7061832  |
| sp Q9BVC6 TM109_HUMAN   | -0.1495514 | 0.7061832  |
| sp P51178-2 PLCD1_HUMAN | -0.1491547 | 0.2178309  |
| sp P10515 ODP2_HUMAN    | -0.1487503 | 0.90036625 |
| sp Q969V3-2 NCLN_HUMAN  | -0.1473389 | 0.7061832  |
| sp Q08380 LG3BP_HUMAN   | -0.1471672 | 0.51870745 |
| sp P23229-4 ITA6_HUMAN  | -0.146553  | 1.1932944  |
| sp Q8TD55 PKHO2_HUMAN   | -0.1464691 | 0.45033538 |
| sp P62304 RUXE_HUMAN    | -0.1459808 | 1.1932944  |
| sp P18084 ITB5_HUMAN    | -0.1457424 | 1.1932944  |
| sp P29350-3 PTN6_HUMAN  | -0.1455545 | 0.04454162 |
| sp P06132 DCUP_HUMAN    | -0.1449566 | 0.5111962  |
| sp O43681 ASNA_HUMAN    | -0.1446152 | 0.2178309  |
| sp P07858 CATB_HUMAN    | -0.1446056 | 0.7827403  |
| sp Q13177 PAK2_HUMAN    | -0.1440373 | 0          |
| sp Q06136 KDSR_HUMAN    | -0.1426125 | 1.1932944  |
| sp P42704 LPPRC_HUMAN   | -0.142395  | 0.4075265  |
| sp P62906 RL10A_HUMAN   | -0.1414013 | 0.6509351  |
| sp Q13045-2 FLII_HUMAN  | -0.1400032 | 0.79861414 |
| sp P09651-3 ROA1_HUMAN  | -0.1391068 | 0.35795313 |
| sp O75347 TBCA_HUMAN    | -0.1385613 | 0.91601294 |
| sp Q13884 SNTB1_HUMAN   | -0.1375885 | 0.19149946 |
| sp Q5TFE4 NT5D1_HUMAN   | -0.1373634 | 0.312067   |
| sp Q9NZM1-6 MYOF_HUMAN  | -0.1370182 | 0.5630115  |
| sp P22314 UBA1_HUMAN    | -0.1365204 | 0.38718706 |
| sp P63096 GNAI1_HUMAN   | -0.1364784 | 0.09894868 |
| sp Q16836-3 HCDH_HUMAN  | -0.1362305 | 0.91601294 |
| sp Q04695 K1C17_HUMAN   | -0.135725  | 0.656254   |
| sp Q13418 ILK_HUMAN     | -0.135437  | 0.0846519  |
| sp P53634 CATC_HUMAN    | -0.13517   | 0.35795313 |
| sp Q15233 NONO_HUMAN    | -0.1344814 | 1.1895121  |
| sp Q9H4A4 AMPB_HUMAN    | -0.1344318 | 0.5474665  |
| sp Q15404 RSU1_HUMAN    | -0.1339073 | 0.656254   |

|                         |            |            |
|-------------------------|------------|------------|
| sp Q8NHV1 GIMA7_HUMAN   | -0.13381   | 1.1932944  |
| sp P01903 DRA_HUMAN     | -0.1337547 | 0.6298893  |
| sp Q9NQG5 RPR1B_HUMAN   | -0.1332989 | 0.91601294 |
| sp P63000-2 RAC1_HUMAN  | -0.1332588 | 0          |
| sp Q86UX7-2 URP2_HUMAN  | -0.1331577 | 1.0044178  |
| sp Q8WVM8 SCFD1_HUMAN   | -0.1329517 | 0.33495146 |
| sp O60701-2 UGDH_HUMAN  | -0.1305618 | 0          |
| sp Q14204 DYHC1_HUMAN   | -0.1292038 | 1.2669417  |
| sp Q13126-2 MTAP_HUMAN  | -0.1288872 | 1.1240381  |
| sp P30046 DOPD_HUMAN    | -0.1275425 | 0.45033538 |
| sp E9PAV3 NACAM_HUMAN   | -0.1271095 | 0.7827403  |
| sp Q8NHP8 PLBL2_HUMAN   | -0.1268616 | 0.19149946 |
| sp P27361 MK03_HUMAN    | -0.1262837 | 1.1505735  |
| sp P53041 PPP5_HUMAN    | -0.1259937 | 0.7061832  |
| sp P23246 SFPQ_HUMAN    | -0.1248856 | 1.1470993  |
| sp Q92556 ELMO1_HUMAN   | -0.1246605 | 0.5111962  |
| sp Q9BWD1 THIC_HUMAN    | -0.1242142 | 0.19149946 |
| sp P30466 1B18_HUMAN    | -0.1240883 | 0.656254   |
| sp Q7Z4W1 DCXR_HUMAN    | -0.1237946 | 1.0485198  |
| sp Q9UQ80 PA2G4_HUMAN   | -0.1231918 | 0          |
| sp P21964-2 COMT_HUMAN  | -0.1218014 | 0.9968222  |
| sp P68400 CSK21_HUMAN   | -0.1210709 | 0.5204253  |
| sp P21953 ODBB_HUMAN    | -0.1205959 | 0.7061832  |
| sp Q06210-2 GFPT1_HUMAN | -0.1202183 | 0.4075265  |
| sp O43865 SAHH2_HUMAN   | -0.1200924 | 0.09894868 |
| sp Q9BQE3 TBA1C_HUMAN   | -0.1199951 | 0          |
| sp Q9BT78 CSN4_HUMAN    | -0.1191788 | 0.5111962  |
| sp Q13185 CBX3_HUMAN    | -0.1185494 | 0.8983557  |
| sp P05534 1A24_HUMAN    | -0.1182041 | 0.2178309  |
| sp P36873-2 PP1G_HUMAN  | -0.1178837 | 1.1932944  |
| sp P40306 PSB10_HUMAN   | -0.1176453 | 1.0485198  |
| sp Q8N684-3 CPSF7_HUMAN | -0.1175079 | 0.6070219  |
| sp Q13976 KGP1_HUMAN    | -0.1168537 | 0          |
| sp Q15393 SF3B3_HUMAN   | -0.1165028 | 0.7217418  |
| sp Q99829 CPNE1_HUMAN   | -0.1163769 | 0.6509351  |
| sp Q9UL18 AGO1_HUMAN    | -0.1160278 | 0.35795313 |
| sp O75436 VP26A_HUMAN   | -0.1160107 | 0.84879977 |
| sp P49354-2 FNNTA_HUMAN | -0.1158781 | 1.2095301  |
| sp P26599-2 PTBP1_HUMAN | -0.1158352 | 0.8339169  |
| sp Q9Y262-2 EIF3L_HUMAN | -0.1155987 | 0.29066643 |
| sp Q9NQR4 NIT2_HUMAN    | -0.1154747 | 0.65625405 |
| sp Q02978-2 M2OM_HUMAN  | -0.1152802 | 0.7061832  |
| sp Q01813-2 PFKAP_HUMAN | -0.1151314 | 0.65625405 |
| sp P28482 MK01_HUMAN    | -0.1131668 | 0.84879977 |
| sp Q92597 NDRG1_HUMAN   | -0.1126461 | 0.7588735  |

|                         |            |            |
|-------------------------|------------|------------|
| sp P46976-2 GLYG_HUMAN  | -0.1122513 | 0.65625405 |
| sp Q9BTE1 DCTN5_HUMAN   | -0.1121111 | 0.19149946 |
| sp P18085 ARF4_HUMAN    | -0.1120873 | 0.656254   |
| sp P63220 RS21_HUMAN    | -0.1118393 | 1.1932944  |
| sp P53007 TXTP_HUMAN    | -0.1117382 | 0.90036625 |
| sp O75340-2 PDCD6_HUMAN | -0.111681  | 0.35795313 |
| sp P63104 1433Z_HUMAN   | -0.1109772 | 0.2699497  |
| sp Q9UMS4 PRP19_HUMAN   | -0.1109314 | 0.5832693  |
| sp Q13217 DNJC3_HUMAN   | -0.1108322 | 0.6298893  |
| sp Q7Z7H5-3 TMED4_HUMAN | -0.1101551 | 1.1932944  |
| sp Q9BZZ5-5 API5_HUMAN  | -0.1091843 | 0.84879977 |
| sp Q86U42-2 PABP2_HUMAN | -0.1082802 | 0          |
| sp Q8N392 RHG18_HUMAN   | -0.1080341 | 0          |
| sp Q9Y6W5 WASF2_HUMAN   | -0.1074524 | 0.7061832  |
| sp P30050 RL12_HUMAN    | -0.1066628 | 0.5111962  |
| sp Q9H0W9-2 CK054_HUMAN | -0.1065826 | 0.52598757 |
| sp O94760 DDAH1_HUMAN   | -0.1056919 | 0.6298893  |
| sp P02649 APOE_HUMAN    | -0.1056004 | 0.89178735 |
| sp P07996 TSP1_HUMAN    | -0.103817  | 0.5204253  |
| sp O94973-2 AP2A2_HUMAN | -0.1037483 | 0.7827403  |
| sp Q07955-3 SRSF1_HUMAN | -0.1036949 | 0.6255959  |
| sp P54802 ANAG_HUMAN    | -0.1033001 | 0.45033538 |
| sp P61160 ARP2_HUMAN    | -0.1027794 | 0.19149946 |
| sp Q8NF91-4 SYNE1_HUMAN | -0.101943  | 0.19149946 |
| sp P51858 HDGF_HUMAN    | -0.0995159 | 0.30372584 |
| sp P67775 PP2AA_HUMAN   | -0.0993099 | 0          |
| sp Q86VS8 HOOK3_HUMAN   | -0.0991364 | 0.19149946 |
| sp O75937 DNJC8_HUMAN   | -0.0978508 | 0.7588735  |
| sp P45954-2 ACDSB_HUMAN | -0.0972939 | 0          |
| sp Q9Y371-2 SHLB1_HUMAN | -0.0972099 | 0          |
| sp P54578-3 UBP14_HUMAN | -0.0971432 | 0.1342476  |
| sp O00429-6 DNM1L_HUMAN | -0.0971146 | 0.26546443 |
| sp Q9Y3B3 TMED7_HUMAN   | -0.0968628 | 0.19149946 |
| sp P36776-3 LONM_HUMAN  | -0.0967646 | 0.95332193 |
| sp P52272-2 HNRPM_HUMAN | -0.0967445 | 0.8469722  |
| sp Q16647 PTGIS_HUMAN   | -0.0965643 | 0.6115017  |
| sp Q92598-2 HS105_HUMAN | -0.0963955 | 0.656254   |
| sp Q12905 ILF2_HUMAN    | -0.0963593 | 0.5004855  |
| sp P48449-3 ERG7_HUMAN  | -0.0958519 | 0.5111962  |
| sp P02768 ALBU_HUMAN    | -0.0957909 | 1.0092533  |
| sp Q9UJS0-2 CMC2_HUMAN  | -0.095356  | 1.1932944  |
| sp P25787 PSA2_HUMAN    | -0.0952215 | 0.9968222  |
| sp P06748-2 NPM_HUMAN   | -0.0947742 | 0.2178309  |
| sp O75947-2 ATP5H_HUMAN | -0.0938892 | 0.9533461  |
| sp P48637 GSHB_HUMAN    | -0.0937634 | 0.6827362  |

|                         |            |            |
|-------------------------|------------|------------|
| sp P55884-2 EIF3B_HUMAN | -0.0933991 | 0.23541966 |
| sp P54136 SYRC_HUMAN    | -0.0933571 | 0.09339783 |
| sp Q13435 SF3B2_HUMAN   | -0.0932007 | 0.312067   |
| sp P00325 ADH1B_HUMAN   | -0.0931187 | 0.65625405 |
| sp P26038 MOES_HUMAN    | -0.092556  | 0.68123025 |
| sp P12081-4 SYHC_HUMAN  | -0.092413  | 0          |
| sp P61313 RL15_HUMAN    | -0.0923767 | 0          |
| sp P26885 FKBP2_HUMAN   | -0.0923615 | 0.45033538 |
| sp P00568 KAD1_HUMAN    | -0.091547  | 0.852217   |
| sp Q96TC7 RMD3_HUMAN    | -0.0910797 | 0.91601294 |
| sp P52758 RIDA_HUMAN    | -0.0909653 | 0.7827403  |
| sp Q99714 HCD2_HUMAN    | -0.0908012 | 1.2432404  |
| sp P23142-4 FBLN1_HUMAN | -0.0907688 | 0          |
| sp P30085 KCY_HUMAN     | -0.090682  | 0.7061832  |
| sp Q15365 PCBP1_HUMAN   | -0.0898323 | 0.7217418  |
| sp P58107 EPIPL_HUMAN   | -0.0897989 | 0.46530083 |
| sp P32455 GBP1_HUMAN    | -0.0894337 | 1.120602   |
| sp O43747-2 AP1G1_HUMAN | -0.0893326 | 0.5111962  |
| sp Q16775-2 GLO2_HUMAN  | -0.0887814 | 0.2178309  |
| sp P20618 PSB1_HUMAN    | -0.0885849 | 1.2805575  |
| sp P30566 PUR8_HUMAN    | -0.0882378 | 0.656254   |
| sp Q96KP4 CNDP2_HUMAN   | -0.0875359 | 1.0584712  |
| sp P02792 FRIL_HUMAN    | -0.0871429 | 0.20467198 |
| sp P11142 HSP7C_HUMAN   | -0.08708   | 0.66672885 |
| sp P10606 COX5B_HUMAN   | -0.0865002 | 0.7061832  |
| sp Q13813-3 SPTN1_HUMAN | -0.0862503 | 0.19149946 |
| sp P68104 EF1A1_HUMAN   | -0.0862312 | 0.57986265 |
| sp P07358 CO8B_HUMAN    | -0.0857563 | 0.06291623 |
| sp O43684-2 BUB3_HUMAN  | -0.0857544 | 0.19149946 |
| sp Q14103-3 HNRPD_HUMAN | -0.0856972 | 0.54838234 |
| sp Q66K74-2 MAP1S_HUMAN | -0.0853272 | 0          |
| sp O15260-2 SURF4_HUMAN | -0.0852308 | 0.45033538 |
| sp P61981 1433G_HUMAN   | -0.0849304 | 1.0009397  |
| sp P29400-2 CO4A5_HUMAN | -0.0849152 | 0          |
| sp O75915 PRAF3_HUMAN   | -0.0843878 | 0.91601294 |
| sp O43776 SYNC_HUMAN    | -0.0840988 | 0.05634482 |
| sp P49588-2 SYAC_HUMAN  | -0.0838833 | 0.4726498  |
| sp P08237-3 PFKAM_HUMAN | -0.0838623 | 0          |
| sp Q9Y2B0 CNPY2_HUMAN   | -0.0835648 | 0          |
| sp Q92973-2 TNPO1_HUMAN | -0.0831871 | 0.30372584 |
| sp Q06033-2 ITIH3_HUMAN | -0.0826988 | 0.19149946 |
| sp P13797 PLST_HUMAN    | -0.0821762 | 0.32367095 |
| sp P55010 IF5_HUMAN     | -0.0821171 | 0.7588735  |
| sp P07384 CAN1_HUMAN    | -0.0821114 | 0.37744418 |
| sp P37802 TAGL2_HUMAN   | -0.0820923 | 0.45546502 |

|                         |            |            |
|-------------------------|------------|------------|
| sp P41091 IF2G_HUMAN    | -0.081768  | 0.33495146 |
| sp Q9HAV0 GBB4_HUMAN    | -0.0814991 | 0          |
| sp O75369-2 FLNB_HUMAN  | -0.0812931 | 1.0147437  |
| sp P54577 SYYC_HUMAN    | -0.0811462 | 0.61034113 |
| sp Q07507 DERM_HUMAN    | -0.0810204 | 1.2805575  |
| sp Q02543 RL18A_HUMAN   | -0.0808353 | 1.214352   |
| sp Q14974 IMB1_HUMAN    | -0.0807819 | 0.85449874 |
| sp P17612 KAPCA_HUMAN   | -0.080492  | 0.6298893  |
| sp O14787-2 TNPO2_HUMAN | -0.0799246 | 0          |
| sp P46108 CRK_HUMAN     | -0.0790901 | 0.7957244  |
| sp P38919 IF4A3_HUMAN   | -0.0790844 | 0.68888646 |
| sp P09211 GSTP1_HUMAN   | -0.0789566 | 0.08684197 |
| sp P62263 RS14_HUMAN    | -0.0783138 | 0.2178309  |
| sp Q9NSE4 SYIM_HUMAN    | -0.0778847 | 0.06842031 |
| sp Q13938-4 CAYP1_HUMAN | -0.0778103 | 0          |
| sp P49903-2 SPS1_HUMAN  | -0.0775528 | 0.35795313 |
| sp Q00610-2 CLH1_HUMAN  | -0.07728   | 0.26865074 |
| sp Q92696 PGTA_HUMAN    | -0.0762901 | 0          |
| sp P40227 TCPZ_HUMAN    | -0.0762482 | 0.25761655 |
| sp Q8TAT6-2 NPL4_HUMAN  | -0.0760307 | 0.30372584 |
| sp P52565 GDIR1_HUMAN   | -0.0752792 | 0.5283125  |
| sp Q9Y305-4 ACOT9_HUMAN | -0.0752068 | 0          |
| sp P61923 COPZ1_HUMAN   | -0.0748415 | 0          |
| sp P29218 IMPA1_HUMAN   | -0.0747204 | 0.6063746  |
| sp Q96AG4 LRC59_HUMAN   | -0.0743656 | 1.1791906  |
| sp P06756-3 ITAV_HUMAN  | -0.0741406 | 0.65625405 |
| sp P62888 RL30_HUMAN    | -0.0741043 | 0.91601294 |
| sp Q02952-2 AKA12_HUMAN | -0.0738525 | 0.19149946 |
| sp P11586 C1TC_HUMAN    | -0.0737228 | 0.2178309  |
| sp Q14165 MLEC_HUMAN    | -0.0730686 | 0.7061832  |
| sp P35998 PRS7_HUMAN    | -0.0730228 | 1.0009397  |
| sp O75964 ATP5L_HUMAN   | -0.0729523 | 0.45033538 |
| sp Q9NSD9 SYFB_HUMAN    | -0.0727997 | 0.1342476  |
| sp Q02790 FKBP4_HUMAN   | -0.072773  | 1.2095301  |
| sp P00492 HPRT_HUMAN    | -0.0726166 | 0.1342476  |
| sp O94788-3 AL1A2_HUMAN | -0.0725908 | 0.656254   |
| sp Q96FN4 CPNE2_HUMAN   | -0.0723763 | 0          |
| sp P28065-2 PSB9_HUMAN  | -0.0722313 | 0.4075265  |
| sp O15127 SCAM2_HUMAN   | -0.0722046 | 0.7061832  |
| sp Q96QK1 VPS35_HUMAN   | -0.0719128 | 0.48353976 |
| sp O94905 ERLN2_HUMAN   | -0.0717545 | 1.1932944  |
| sp O95336 6PGL_HUMAN    | -0.0715733 | 0.4075265  |
| sp Q9NUQ9 FA49B_HUMAN   | -0.0709705 | 0.2178309  |
| sp Q9Y5K5-2 UCHL5_HUMAN | -0.070961  | 0.43633315 |
| sp Q32P44 EMAL3_HUMAN   | -0.0707836 | 0.43633315 |

|                         |            |            |
|-------------------------|------------|------------|
| sp P31948 STIP1_HUMAN   | -0.0707626 | 0          |
| sp O00299 CLIC1_HUMAN   | -0.0706558 | 0.3029608  |
| sp Q13425 SNTB2_HUMAN   | -0.0705185 | 0.09750395 |
| sp Q3LXA3 TKFC_HUMAN    | -0.0703239 | 0.24295025 |
| sp O95340-2 PAPS2_HUMAN | -0.0702934 | 0.35193655 |
| sp Q5JPE7-2 NOMO2_HUMAN | -0.0701389 | 0.2178309  |
| sp Q8NCW5 NNRE_HUMAN    | -0.0687141 | 0          |
| sp O00743-3 PPP6_HUMAN  | -0.0686302 | 0.35795313 |
| sp P49720 PSB3_HUMAN    | -0.0684109 | 0.56808305 |
| sp O94804 STK10_HUMAN   | -0.0682182 | 0.19149946 |
| sp P39060-1 COIA1_HUMAN | -0.0680008 | 0.44572112 |
| sp P25786-2 PSA1_HUMAN  | -0.067955  | 1.2474942  |
| sp P35579-2 MYH9_HUMAN  | -0.0677929 | 0.656254   |
| sp P22234-2 PUR6_HUMAN  | -0.0671654 | 0.37060758 |
| sp P46777 RL5_HUMAN     | -0.0670261 | 0.08307569 |
| sp Q9UHX1-6 PUF60_HUMAN | -0.0664654 | 0          |
| sp P16219 ACADS_HUMAN   | -0.0664101 | 0.14672586 |
| sp Q15631 TSN_HUMAN     | -0.0659523 | 0.06291623 |
| sp P07203 GPX1_HUMAN    | -0.0652466 | 0.43103603 |
| sp O60749 SNX2_HUMAN    | -0.0649891 | 0.76289684 |
| sp P39019 RS19_HUMAN    | -0.0649452 | 0.2178309  |
| sp P55786 PSA_HUMAN     | -0.0647259 | 0.3840488  |
| sp P15170-2 ERF3A_HUMAN | -0.064373  | 0          |
| sp P14618 KPYM_HUMAN    | -0.0642414 | 0          |
| sp P29466-2 CASP1_HUMAN | -0.0640602 | 0          |
| sp P54727 RD23B_HUMAN   | -0.0638886 | 0.5204253  |
| sp Q10713 MPPA_HUMAN    | -0.063549  | 0.33495146 |
| sp Q96MM6 HS12B_HUMAN   | -0.0634537 | 0.06986027 |
| sp Q13561-2 DCTN2_HUMAN | -0.0630188 | 1.1752976  |
| sp P26641 EF1G_HUMAN    | -0.0625916 | 0.4808736  |
| sp P08236-2 BGLR_HUMAN  | -0.0624828 | 0.30372584 |
| sp Q8WXF1 PSPC1_HUMAN   | -0.0622787 | 0.33495146 |
| sp Q5EBM0 CMPK2_HUMAN   | -0.0622721 | 0.09894868 |
| sp Q9NQW7-3 XPP1_HUMAN  | -0.0622444 | 0.08891098 |
| sp P28066 PSA5_HUMAN    | -0.0621796 | 0.7498006  |
| sp Q9P0L0-2 VAPA_HUMAN  | -0.061882  | 0.45720983 |
| sp Q96JB5-4 CK5P3_HUMAN | -0.061821  | 0.09894868 |
| sp P24539 AT5F1_HUMAN   | -0.0615196 | 0          |
| sp Q16539-2 MK14_HUMAN  | -0.0615025 | 0.19149946 |
| sp P15144 AMPN_HUMAN    | -0.0609169 | 0.316588   |
| sp Q9Y6A4 CFA20_HUMAN   | -0.0607166 | 0.19149946 |
| sp P28074 PSB5_HUMAN    | -0.0607147 | 0          |
| sp P35268 RL22_HUMAN    | -0.0606346 | 0.35795313 |
| sp Q16401-2 PSMD5_HUMAN | -0.0606003 | 0.48520416 |
| sp P60983 GMFB_HUMAN    | -0.0602951 | 0.35795313 |

|                         |            |            |
|-------------------------|------------|------------|
| sp P15311 EZRI_HUMAN    | -0.0599489 | 0          |
| sp P49189 AL9A1_HUMAN   | -0.0597305 | 0.3037259  |
| sp P35222 CTNB1_HUMAN   | -0.0596619 | 0.386649   |
| sp P11498 PYC_HUMAN     | -0.059413  | 0          |
| sp Q9HBL0 TENS1_HUMAN   | -0.0586567 | 0.02388411 |
| sp P63244 RACK1_HUMAN   | -0.0579853 | 0.5998898  |
| sp P04424-2 ARLY_HUMAN  | -0.057663  | 0.57986265 |
| sp Q04323-2 UBXN1_HUMAN | -0.0575333 | 0          |
| sp P46940 IQGA1_HUMAN   | -0.0572071 | 0.33057013 |
| sp P29590 PML_HUMAN     | -0.0566711 | 0.20549615 |
| sp P25325-2 THTM_HUMAN  | -0.0566387 | 0.06291623 |
| sp P28070 PSB4_HUMAN    | -0.0562515 | 0.316588   |
| sp P01920 DQB1_HUMAN    | -0.0561085 | 0.19149946 |
| sp P09417-2 DHPR_HUMAN  | -0.055727  | 0          |
| sp P19367-2 HXK1_HUMAN  | -0.0553093 | 0.2909411  |
| sp O43837 IDH3B_HUMAN   | -0.0552444 | 0.2178309  |
| sp O95571 ETHE1_HUMAN   | -0.0550346 | 0.95332193 |
| sp O60256-3 KPRB_HUMAN  | -0.0549641 | 0.45033538 |
| sp Q969X5-2 ERGI1_HUMAN | -0.0547962 | 0.09894868 |
| sp P16157-21 ANK1_HUMAN | -0.0545044 | 0.37060758 |
| sp O75643 U520_HUMAN    | -0.0543633 | 0.28516325 |
| sp P27487 DPP4_HUMAN    | -0.0543098 | 0.30372584 |
| sp P46926 GNPI1_HUMAN   | -0.0538464 | 0.21439649 |
| sp P52566 GDIR2_HUMAN   | -0.0535164 | 0.6509351  |
| sp Q96CN7 ISOC1_HUMAN   | -0.0535011 | 0.20467198 |
| sp P51888 PRELP_HUMAN   | -0.0533276 | 0.8826702  |
| sp P22897 MRC1_HUMAN    | -0.0531921 | 1.1600966  |
| sp Q9P2R7-2 SUCB1_HUMAN | -0.0529766 | 0.1500082  |
| sp P61201-2 CSN2_HUMAN  | -0.0520706 | 0.19149946 |
| sp Q9Y3A5 SBDS_HUMAN    | -0.0518684 | 0.02174174 |
| sp Q9BS26 ERP44_HUMAN   | -0.0517159 | 0.6115017  |
| sp P15374 UCHL3_HUMAN   | -0.0509949 | 0.17319627 |
| sp P55263 ADK_HUMAN     | -0.0509758 | 0.1342476  |
| sp P00387-3 NB5R3_HUMAN | -0.0507183 | 0.95332193 |
| sp P31942-2 HNRH3_HUMAN | -0.0503616 | 0.56808305 |
| sp P10155 RO60_HUMAN    | -0.0500374 | 0.04454162 |
| sp P61081 UBC12_HUMAN   | -0.049511  | 0.11949348 |
| sp Q96C23 GALM_HUMAN    | -0.0493193 | 0          |
| sp Q15029-2 U5S1_HUMAN  | -0.0492687 | 0.6828178  |
| sp P17980 PRS6A_HUMAN   | -0.0491009 | 0.2838047  |
| sp Q96FV2-2 SCRN2_HUMAN | -0.0487289 | 0.45033538 |
| sp O15498-2 YKT6_HUMAN  | -0.0486279 | 0          |
| sp P47755 CAZA2_HUMAN   | -0.0481968 | 0.56639653 |
| sp P00736 C1R_HUMAN     | -0.0480814 | 0.35795313 |
| sp P55209-2 NP1L1_HUMAN | -0.047823  | 0          |



|                         |            |            |
|-------------------------|------------|------------|
| sp Q03154-4 ACY1_HUMAN  | -0.0477085 | 0.2178309  |
| sp Q9NP79 VTA1_HUMAN    | -0.0463638 | 0.09894868 |
| sp P60866-2 RS20_HUMAN  | -0.0463409 | 0          |
| sp P50914 RL14_HUMAN    | -0.0460129 | 0.35795313 |
| sp B5ME19 EIFCL_HUMAN   | -0.045557  | 0.35795313 |
| sp P11166 GTR1_HUMAN    | -0.0453548 | 0          |
| sp P49411 EFTU_HUMAN    | -0.0446491 | 0.22817776 |
| sp O95865 DDAH2_HUMAN   | -0.0446434 | 0.1318641  |
| sp Q9Y2X3 NOP58_HUMAN   | -0.044548  | 0.33495146 |
| sp Q15366-2 PCBP2_HUMAN | -0.0437698 | 0.2178309  |
| sp Q969H8 MYDGF_HUMAN   | -0.0436459 | 0.35795313 |
| sp P0C0S5 H2AZ_HUMAN    | -0.0434856 | 0          |
| sp P37108 SRP14_HUMAN   | -0.0432529 | 0.19149946 |
| sp O43491 E41L2_HUMAN   | -0.0428371 | 0.09851671 |
| sp P09619 PGFRB_HUMAN   | -0.0428314 | 0          |
| sp P62136 PP1A_HUMAN    | -0.0426178 | 0.35795313 |
| sp Q92888-2 ARHG1_HUMAN | -0.0425758 | 0          |
| sp Q12907 LMAN2_HUMAN   | -0.0424614 | 0.7957244  |
| sp P13861 KAP2_HUMAN    | -0.0424004 | 0.1017544  |
| sp Q07020-2 RL18_HUMAN  | -0.0423145 | 0.7061832  |
| sp P33316 DUT_HUMAN     | -0.0413361 | 0.19149946 |
| sp O95782-2 AP2A1_HUMAN | -0.0412827 | 0.33495146 |
| sp Q13409-3 DC1I2_HUMAN | -0.0410566 | 0.03367973 |
| sp O60784-3 TOM1_HUMAN  | -0.0409584 | 0          |
| sp Q9Y3I0 RTCB_HUMAN    | -0.040062  | 0.29934928 |
| sp Q8N163-2 CCAR2_HUMAN | -0.0399914 | 0          |
| sp P40123-2 CAP2_HUMAN  | -0.0399532 | 0          |
| sp O43390-2 HNRPR_HUMAN | -0.0399284 | 0.24660711 |
| sp Q8N1G4 LRC47_HUMAN   | -0.039463  | 0.11612091 |
| sp P53597 SUCA_HUMAN    | -0.0393639 | 0          |
| sp Q96HN2-2 SAHH3_HUMAN | -0.0368423 | 0          |
| sp Q9UNM6-2 PSD13_HUMAN | -0.0367928 | 0          |
| sp Q9UNF0-2 PACN2_HUMAN | -0.0367088 | 0.20467198 |
| sp Q9UN86-2 G3BP2_HUMAN | -0.036602  | 0          |
| sp Q16134-3 ETFD_HUMAN  | -0.0360365 | 0.19149946 |
| sp P07900-2 HS90A_HUMAN | -0.0359478 | 0.24801621 |
| sp Q9BUF5 TBB6_HUMAN    | -0.035635  | 0.30372584 |
| sp P22626 ROA2_HUMAN    | -0.0354233 | 0.90892553 |
| sp Q99598 TSNAX_HUMAN   | -0.0353832 | 0          |
| sp P50502 F10A1_HUMAN   | -0.0351906 | 0.04454162 |
| sp Q13526 PIN1_HUMAN    | -0.0345364 | 0          |
| sp P27797 CALR_HUMAN    | -0.0342979 | 0.45915356 |
| sp Q8NBJ5 GT251_HUMAN   | -0.0339432 | 0.09894868 |
| sp Q8TCJ2 STT3B_HUMAN   | -0.0337677 | 0.35795313 |
| sp P25705 ATPA_HUMAN    | -0.0335064 | 0.09750395 |

|                         |            |            |
|-------------------------|------------|------------|
| sp Q08211 DHX9_HUMAN    | -0.0329437 | 0.29317275 |
| sp P31153 METK2_HUMAN   | -0.0327816 | 0          |
| sp Q92499 DDX1_HUMAN    | -0.0323505 | 0.3852666  |
| sp P08238 HS90B_HUMAN   | -0.0322266 | 0.5360584  |
| sp P22061-2 PIMT_HUMAN  | -0.0320377 | 0.30372584 |
| sp Q9H6S3 ES8L2_HUMAN   | -0.0319052 | 0.19149946 |
| sp Q15717-2 ELAV1_HUMAN | -0.031353  | 0.09894868 |
| sp P08559-2 ODPA_HUMAN  | -0.0301933 | 0.07727676 |
| sp Q7Z4I7-3 LIMS2_HUMAN | -0.0299683 | 0.19149946 |
| sp Q92522 H1X_HUMAN     | -0.029871  | 0.19149946 |
| sp Q9NY15 STAB1_HUMAN   | -0.0298462 | 0          |
| sp P05455 LA_HUMAN      | -0.0297737 | 0.44572112 |
| sp Q9Y6N5 SQOR_HUMAN    | -0.0296116 | 0.03435687 |
| sp Q12931-2 TRAP1_HUMAN | -0.0294609 | 0.35795313 |
| sp P43034 LIS1_HUMAN    | -0.0293274 | 0.03367973 |
| sp P02794 FRIH_HUMAN    | -0.0293007 | 0          |
| sp Q6IAA8 LTOR1_HUMAN   | -0.0290546 | 0.19149946 |
| sp P23588 IF4B_HUMAN    | -0.0289764 | 0.1342476  |
| sp Q9BS40 LXN_HUMAN     | -0.028944  | 0.06291623 |
| sp Q16543 CDC37_HUMAN   | -0.0285397 | 0.4918224  |
| sp O75489 NDUS3_HUMAN   | -0.0278931 | 0.1342476  |
| sp P00338 LDHA_HUMAN    | -0.0277729 | 0.03956581 |
| sp O43790 KRT86_HUMAN   | -0.0277615 | 0          |
| sp Q9NZK5 ADA2_HUMAN    | -0.0271149 | 0.45033538 |
| sp Q16774 KGUA_HUMAN    | -0.02672   | 0          |
| sp P11216 PYGB_HUMAN    | -0.0262146 | 0.06468696 |
| sp Q9UKV3-5 ACINU_HUMAN | -0.0262051 | 0.21439649 |
| sp P16298-4 PP2BB_HUMAN | -0.0257359 | 0          |
| sp Q9UH99-3 SUN2_HUMAN  | -0.025692  | 0.21439649 |
| sp P98160 PGBM_HUMAN    | -0.0245514 | 0.2929586  |
| sp P27694 RFA1_HUMAN    | -0.0244694 | 0.20467198 |
| sp P39656-3 OST48_HUMAN | -0.0242844 | 0.53506804 |
| sp P50990 TCPQ_HUMAN    | -0.0236511 | 0.1024875  |
| sp P28072 PSB6_HUMAN    | -0.0234489 | 0.09894868 |
| sp P0DPI2-2 GAL3A_HUMAN | -0.0229511 | 0.09894868 |
| sp Q15102 PA1B3_HUMAN   | -0.0229149 | 0.2178309  |
| sp P10599-2 THIO_HUMAN  | -0.022913  | 0.21439649 |
| sp Q969G5 CAVN3_HUMAN   | -0.0226154 | 0.2178309  |
| sp P12277 KCRB_HUMAN    | -0.0222225 | 0.02347357 |
| sp O14617-4 AP3D1_HUMAN | -0.0219345 | 0          |
| sp P30041 PRDX6_HUMAN   | -0.0219021 | 0.308482   |
| sp P17987 TCPA_HUMAN    | -0.0218391 | 0.16800755 |
| sp P12955 PEPD_HUMAN    | -0.0215054 | 0.10861364 |
| sp O75368 SH3L1_HUMAN   | -0.0211754 | 0.09894868 |
| sp O43143 DHX15_HUMAN   | -0.0211449 | 0          |

|                          |            |            |
|--------------------------|------------|------------|
| sp P49591 SYSC_HUMAN     | -0.0209522 | 0.05681695 |
| sp Q9NZL9 MAT2B_HUMAN    | -0.020813  | 0          |
| sp P51665 PSMD7_HUMAN    | -0.0204697 | 0.19149946 |
| sp P08865 RSSA_HUMAN     | -0.0196114 | 0.01819076 |
| sp P78417-2 GSTO1_HUMAN  | -0.0192776 | 0.656254   |
| sp Q96CW1-2 AP2M1_HUMAN  | -0.018877  | 0.40256184 |
| sp Q16891-2 MIC60_HUMAN  | -0.0187168 | 0.16702904 |
| sp Q86UP2-4 KTN1_HUMAN   | -0.0185623 | 0.08255737 |
| sp P16070-7 CD44_HUMAN   | -0.0181046 | 0          |
| sp P00367 DHE3_HUMAN     | -0.0179462 | 0.29301754 |
| sp P55265-4 DSRAD_HUMAN  | -0.0177841 | 0.04707252 |
| sp P12270 TPR_HUMAN      | -0.0175743 | 0.09621262 |
| sp P20674 COX5A_HUMAN    | -0.0171833 | 0.2178309  |
| sp P05387 RLA2_HUMAN     | -0.0164661 | 0.19149946 |
| sp P42167 LAP2B_HUMAN    | -0.0163918 | 0          |
| sp P47756-2 CAPZB_HUMAN  | -0.0161057 | 0.15517515 |
| sp P26196 DDX6_HUMAN     | -0.0160904 | 0          |
| sp Q6XQN6-2 PNCB_HUMAN   | -0.0159493 | 0.10138063 |
| sp P53004 BIEA_HUMAN     | -0.0152626 | 0.20467198 |
| sp P11217 PYGM_HUMAN     | -0.0143528 | 0          |
| sp P02511 CRYAB_HUMAN    | -0.0143185 | 0.1558116  |
| sp P52597 HNRPF_HUMAN    | -0.0142612 | 0.10861364 |
| sp P01019 ANGT_HUMAN     | -0.0141678 | 0.1342476  |
| sp P51692 STA5B_HUMAN    | -0.0137444 | 0.45033538 |
| sp P34897-2 GLYM_HUMAN   | -0.0132236 | 0.1500082  |
| sp P45974-2 UBP5_HUMAN   | -0.0130653 | 0.3761346  |
| sp P56537 IF6_HUMAN      | -0.0130501 | 0.09339783 |
| sp Q92905 CSN5_HUMAN     | -0.0126476 | 0          |
| sp P00966 ASSY_HUMAN     | -0.0124435 | 0.10861364 |
| sp Q5R3I4 TTC38_HUMAN    | -0.0120115 | 0.19149946 |
| sp P09104-2 ENOG_HUMAN   | -0.0117722 | 0.26546443 |
| sp O14579 COPE_HUMAN     | -0.0116577 | 0.33495146 |
| sp Q9BTV4 TMM43_HUMAN    | -0.0114441 | 0          |
| sp Q6UVK1 CSPG4_HUMAN    | -0.0104103 | 0.4075265  |
| sp P62244 RS15A_HUMAN    | -0.0104065 | 0          |
| sp P48047 ATPO_HUMAN     | -0.0102081 | 0.21989624 |
| sp P01911 2B1F_HUMAN     | -0.0097561 | 0.19149946 |
| sp O75396 SC22B_HUMAN    | -0.0096741 | 0.03367973 |
| sp Q86WV6 STING_HUMAN    | -0.0094528 | 0          |
| sp P05166-2 PCCB_HUMAN   | -0.0090599 | 0.26737198 |
| sp A0FGR8-2 ESYT2_HUMAN  | -0.0085754 | 0          |
| sp O94979-10 SC31A_HUMAN | -0.0083485 | 0.09894868 |
| sp O15145 ARPC3_HUMAN    | -0.0082932 | 0          |
| sp Q14498-2 RBM39_HUMAN  | -0.0078087 | 0.14672586 |
| sp P16144-2 ITB4_HUMAN   | -0.0076666 | 0.19149946 |

|                          |            |            |
|--------------------------|------------|------------|
| sp O00487 PSDE_HUMAN     | -0.0074711 | 0.45033538 |
| sp Q9HC35-2 EMAL4_HUMAN  | -0.0072689 | 0.48520416 |
| sp Q14203-3 DCTN1_HUMAN  | -0.0062733 | 0.06986027 |
| sp P31930 QCR1_HUMAN     | -0.0055485 | 0.26295313 |
| sp P22695 QCR2_HUMAN     | -0.0054111 | 0          |
| sp P61978-3 HNRPK_HUMAN  | -0.0051365 | 0.10537347 |
| sp P14866-2 HNRPL_HUMAN  | -0.0050602 | 0          |
| sp Q7KZF4 SND1_HUMAN     | -0.0050354 | 0.00900315 |
| sp P20591 MX1_HUMAN      | -0.0048466 | 0.4075265  |
| sp P02730 B3AT_HUMAN     | -0.0045662 | 0.13745423 |
| sp Q13232 NDK3_HUMAN     | -0.0042744 | 0.1342476  |
| sp O00170 AIP_HUMAN      | -0.0042171 | 0          |
| sp Q9Y4L1 HYOU1_HUMAN    | -0.003315  | 0.14223771 |
| sp P14923 PLAK_HUMAN     | -0.003252  | 0.06291623 |
| sp Q15185-3 TEBP_HUMAN   | -0.0031204 | 0          |
| sp Q9Y3Z3 SAMH1_HUMAN    | -0.0028877 | 0.02127174 |
| sp P46459 NSF_HUMAN      | -0.0026493 | 0.06291623 |
| sp P08294 SODE_HUMAN     | -0.0025978 | 0.03367973 |
| sp P01743 HV146_HUMAN    | -0.0020771 | 0          |
| sp O14828-2 SCAM3_HUMAN  | -0.0020084 | 0.35795313 |
| sp Q12882 DPYD_HUMAN     | -0.0017223 | 0          |
| sp P62942 FKB1A_HUMAN    | -0.0015831 | 0          |
| sp P26640 SYVC_HUMAN     | -0.0014801 | 0.2591514  |
| sp Q9UI12-2 VATH_HUMAN   | -7.63E-04  | 0.04454162 |
| sp P54652 HSP72_HUMAN    | 2.63E-04   | 0.09894868 |
| sp O75608-2 LYPA1_HUMAN  | 0.00107765 | 0          |
| sp Q08378 GOGA3_HUMAN    | 0.00115013 | 0.35795313 |
| sp Q13557-12 KCC2D_HUMAN | 0.00175285 | 0.06986027 |
| sp Q96CX2 KCD12_HUMAN    | 0.0019722  | 0.1742838  |
| sp Q9NPH2 INO1_HUMAN     | 0.00252533 | 0.1500082  |
| sp P63167 DYL1_HUMAN     | 0.00264549 | 0          |
| sp Q13363-2 CTBP1_HUMAN  | 0.00268364 | 0.19149946 |
| sp P23528 COF1_HUMAN     | 0.00302506 | 0.20174193 |
| sp P68366-2 TBA4A_HUMAN  | 0.00310135 | 0          |
| sp Q00577 PURA_HUMAN     | 0.00311279 | 0.04454162 |
| sp O43242 PSMD3_HUMAN    | 0.00356293 | 0.01073991 |
| sp P10768 ESTD_HUMAN     | 0.0038929  | 0.20467198 |
| sp Q9Y3A3-3 PHOCN_HUMAN  | 0.00438404 | 0.19149946 |
| sp P07237 PDIA1_HUMAN    | 0.00553513 | 0.30662137 |
| sp P27695 APEX1_HUMAN    | 0.00560188 | 0          |
| sp P49721 PSB2_HUMAN     | 0.00595284 | 0.19149946 |
| sp Q8NBF2-2 NHLC2_HUMAN  | 0.00613403 | 0          |
| sp P18077 RL35A_HUMAN    | 0.00629234 | 0          |
| sp Q15008-4 PSMD6_HUMAN  | 0.00661659 | 0.19149946 |
| sp O14745 NHRF1_HUMAN    | 0.00668526 | 0.2178309  |

|                         |            |            |
|-------------------------|------------|------------|
| sp P18124 RL7_HUMAN     | 0.00697708 | 0.26737198 |
| sp P07737 PROF1_HUMAN   | 0.00714874 | 0.09157685 |
| sp P22059 OSBP1_HUMAN   | 0.00797653 | 0          |
| sp Q96DG6 CMBL_HUMAN    | 0.0081234  | 0          |
| sp Q96IJ6-2 GMPPA_HUMAN | 0.00816631 | 0          |
| sp P21810 PGS1_HUMAN    | 0.00882721 | 0.11768232 |
| sp Q13243-3 SRSF5_HUMAN | 0.0090065  | 0          |
| sp P20774 MIME_HUMAN    | 0.00906277 | 0.04454162 |
| sp P46063 RECQ1_HUMAN   | 0.00930786 | 0          |
| sp P15121 ALDR_HUMAN    | 0.00967026 | 0.01819076 |
| sp P60174 TPIS_HUMAN    | 0.00986862 | 0.02228302 |
| sp P40429 RL13A_HUMAN   | 0.0102787  | 0.09894868 |
| sp Q86UX2-2 ITIHS_HUMAN | 0.01057243 | 0.312067   |
| sp P12110 CO6A2_HUMAN   | 0.0106411  | 0.06269496 |
| sp P33176 KINH_HUMAN    | 0.01134872 | 0.46889037 |
| sp P42224-2 STAT1_HUMAN | 0.01155472 | 0.20467198 |
| sp Q13423 NNTM_HUMAN    | 0.01271248 | 0.17511293 |
| sp O43707 ACTN4_HUMAN   | 0.01282692 | 0.6205528  |
| sp Q6WCQ1-2 MPRIP_HUMAN | 0.01292133 | 0.1063047  |
| sp O43301 HS12A_HUMAN   | 0.01348686 | 0.1342476  |
| sp Q9UNZ2-5 NSF1C_HUMAN | 0.01371574 | 0.14927356 |
| sp P49368 TCPG_HUMAN    | 0.01391411 | 0.38040894 |
| sp Q13464 ROCK1_HUMAN   | 0.01453018 | 0          |
| sp P30153 2AAA_HUMAN    | 0.01506043 | 0.21116015 |
| sp Q9UBQ5 EIF3K_HUMAN   | 0.01510239 | 0.19149946 |
| sp P50991-2 TCPD_HUMAN  | 0.01566124 | 0.01551361 |
| sp Q99832 TCPH_HUMAN    | 0.01668739 | 0.44843918 |
| sp Q02878 RL6_HUMAN     | 0.01670647 | 0.35795313 |
| sp P00491 PNPH_HUMAN    | 0.01716042 | 0.21680334 |
| sp P62424 RL7A_HUMAN    | 0.01829147 | 0.09339783 |
| sp O75112-7 LDB3_HUMAN  | 0.01877022 | 0.35795313 |
| sp P28062 PSB8_HUMAN    | 0.01880646 | 0.5111962  |
| sp Q14240-2 IF4A2_HUMAN | 0.01911259 | 0.06291623 |
| sp O43252 PAPS1_HUMAN   | 0.01913834 | 0          |
| sp Q9H299 SH3L3_HUMAN   | 0.01919746 | 0          |
| sp P78371 TCPB_HUMAN    | 0.0204277  | 0.2552695  |
| sp P48681 NEST_HUMAN    | 0.02079201 | 0.1558116  |
| sp P42785-2 PCP_HUMAN   | 0.02090263 | 0.09894868 |
| sp Q9Y3F4-2 STRAP_HUMAN | 0.02092552 | 0.35795313 |
| sp P15529-10 MCP_HUMAN  | 0.02094841 | 0          |
| sp O15143 ARC1B_HUMAN   | 0.02102661 | 0.02174174 |
| sp Q92841-3 DDX17_HUMAN | 0.0211544  | 0.13150784 |
| sp P00558 PGK1_HUMAN    | 0.02119446 | 0.01406953 |
| sp Q92688-2 AN32B_HUMAN | 0.02120018 | 0.35795313 |
| sp O14950 ML12B_HUMAN   | 0.02140617 | 0.40256184 |

|                         |            |            |
|-------------------------|------------|------------|
| sp Q9P0V9-2 SEP10_HUMAN | 0.02160072 | 0.17511293 |
| sp P12004 PCNA_HUMAN    | 0.02183533 | 0          |
| sp O15296 LX15B_HUMAN   | 0.02200699 | 0.25789237 |
| sp Q9NY33 DPP3_HUMAN    | 0.02285767 | 0.16077396 |
| sp Q9UK22 FBX2_HUMAN    | 0.02301788 | 0.19149946 |
| sp P62333 PRS10_HUMAN   | 0.02305222 | 0.11949348 |
| sp Q96C19 EFHD2_HUMAN   | 0.02346993 | 0          |
| sp Q9UEY8 ADDG_HUMAN    | 0.02376938 | 0.05634482 |
| sp P04217 A1BG_HUMAN    | 0.02401733 | 0.31741163 |
| sp P14868 SYDC_HUMAN    | 0.02432442 | 0.51669085 |
| sp Q14764 MVP_HUMAN     | 0.02462769 | 0.3325435  |
| sp P09874 PARP1_HUMAN   | 0.0247364  | 0.19410844 |
| sp P62701 RS4X_HUMAN    | 0.02474976 | 0.06291623 |
| sp P51649-2 SSDH_HUMAN  | 0.0255661  | 0.06291623 |
| sp O95466-2 FMNL1_HUMAN | 0.02561474 | 0          |
| sp P35611-2 ADDA_HUMAN  | 0.02566147 | 0.02174174 |
| sp Q15121 PEA15_HUMAN   | 0.02616692 | 0          |
| sp Q15084-2 PDIA6_HUMAN | 0.02658844 | 0.1558116  |
| sp Q9BRR6-2 ADPGK_HUMAN | 0.0266304  | 0.19149946 |
| sp Q9UHL4 DPP2_HUMAN    | 0.02669716 | 0.3852666  |
| sp P23142 FBLN1_HUMAN   | 0.02698326 | 0.06986027 |
| sp Q9Y394-2 DHRS7_HUMAN | 0.02736664 | 0.06291623 |
| sp Q13492-2 PICAL_HUMAN | 0.02808952 | 0          |
| sp P16152 CBR1_HUMAN    | 0.02826691 | 0.55270666 |
| sp O76003 GLRX3_HUMAN   | 0.02935982 | 0          |
| sp Q96BW5-2 PTER_HUMAN  | 0.03058243 | 0.19149946 |
| sp P50453 SPB9_HUMAN    | 0.03091621 | 0.3201336  |
| sp O76074-2 PDE5A_HUMAN | 0.03158474 | 0.09894868 |
| sp Q16531 DDB1_HUMAN    | 0.03188133 | 0.30084842 |
| sp Q96P70 IPO9_HUMAN    | 0.03191757 | 0.1342476  |
| sp P14174 MIF_HUMAN     | 0.03211212 | 0          |
| sp P22033 MUTA_HUMAN    | 0.03272247 | 0.35795313 |
| sp P06744 G6PI_HUMAN    | 0.03273201 | 0.26694477 |
| sp P28838-2 AMPL_HUMAN  | 0.03281403 | 0.6077942  |
| sp Q1KMD3 HNRL2_HUMAN   | 0.0333004  | 0.3661873  |
| sp Q15691 MARE1_HUMAN   | 0.03347015 | 0.02174174 |
| sp Q5TZA2 CROCC_HUMAN   | 0.03391647 | 0.1342476  |
| sp P30043 BLVRB_HUMAN   | 0.0340004  | 0.30372584 |
| sp O14744 ANM5_HUMAN    | 0.03488541 | 0          |
| sp P05388 RLA0_HUMAN    | 0.03495026 | 0.2178309  |
| sp O60313-10 OPA1_HUMAN | 0.03549194 | 0.19149946 |
| sp P61758 PFD3_HUMAN    | 0.0359726  | 0.19149946 |
| sp P22392-2 NDKB_HUMAN  | 0.03624344 | 0.48520416 |
| sp Q92769 HDAC2_HUMAN   | 0.03636742 | 0          |
| sp P58546 MTPN_HUMAN    | 0.03732109 | 0.5204253  |

|                         |            |            |
|-------------------------|------------|------------|
| sp Q9BVK6 TMED9_HUMAN   | 0.03765678 | 0.35795313 |
| sp Q709C8-3 VP13C_HUMAN | 0.03768539 | 0.7957244  |
| sp Q9H3N1 TMX1_HUMAN    | 0.03775024 | 0.2178309  |
| sp P32456 GBP2_HUMAN    | 0.03800583 | 0.19149946 |
| sp P30086 PEBP1_HUMAN   | 0.0382576  | 0.79861414 |
| sp Q13308-6 PTK7_HUMAN  | 0.03833389 | 0.6298893  |
| sp Q12797-10 ASPH_HUMAN | 0.03833771 | 0.86708647 |
| sp P35858-2 ALS_HUMAN   | 0.03899956 | 0          |
| sp P39687 AN32A_HUMAN   | 0.03905296 | 0.5204253  |
| sp O43488 ARK72_HUMAN   | 0.03908348 | 0.1342476  |
| sp P61956-2 SUMO2_HUMAN | 0.03983307 | 0          |
| sp P07437 TBB5_HUMAN    | 0.04009247 | 0.1342476  |
| sp Q14980-2 NUMA1_HUMAN | 0.04023552 | 0.7871646  |
| sp Q16527 CSR2_HUMAN    | 0.04083633 | 0.09894868 |
| sp Q6DD88 ATLA3_HUMAN   | 0.04119492 | 0.03367973 |
| sp P02748 CO9_HUMAN     | 0.04137421 | 0.49004218 |
| sp Q6P2Q9 PRP8_HUMAN    | 0.04153824 | 0.09894868 |
| sp Q92629-3 SGCD_HUMAN  | 0.04164314 | 0.06291623 |
| sp Q9Y383-3 LC7L2_HUMAN | 0.04169464 | 0.7061832  |
| sp Q13347 EIF3I_HUMAN   | 0.04174042 | 0.09339783 |
| sp O00754-2 MA2B1_HUMAN | 0.04180527 | 0.40256184 |
| sp P62269 RS18_HUMAN    | 0.04191017 | 0.40256184 |
| sp P29692-2 EF1D_HUMAN  | 0.0421505  | 0.09894868 |
| sp P48739 PIPNB_HUMAN   | 0.04233742 | 0          |
| sp P34896-2 GLYC_HUMAN  | 0.04253197 | 0          |
| sp P50579-2 MAP2_HUMAN  | 0.04339409 | 0          |
| sp Q9Y265 RUVB1_HUMAN   | 0.04339409 | 0          |
| sp Q9Y5M8 SRPRB_HUMAN   | 0.04365158 | 0.30372584 |
| sp P52888 THOP1_HUMAN   | 0.04420281 | 0.45033538 |
| sp Q9NYU2-2 UGGG1_HUMAN | 0.04420471 | 0.03956581 |
| sp Q9NUV9 GIMA4_HUMAN   | 0.0444603  | 0.19410844 |
| sp P61916-2 NPC2_HUMAN  | 0.04505348 | 0.19149946 |
| sp Q99873-3 ANM1_HUMAN  | 0.04560852 | 0.14672586 |
| sp Q9ULV4-3 COR1C_HUMAN | 0.0456543  | 0.3852666  |
| sp P46782 RS5_HUMAN     | 0.04626274 | 0.16077396 |
| sp P26373 RL13_HUMAN    | 0.0465622  | 0.7588735  |
| sp P23368 MAOM_HUMAN    | 0.04663849 | 0.16649151 |
| sp Q8WXX5 DNJC9_HUMAN   | 0.04674912 | 0.19149946 |
| sp P43652 AFAM_HUMAN    | 0.04697418 | 0.1318641  |
| sp O00232 PSD12_HUMAN   | 0.04712772 | 0          |
| sp Q9BXP5-2 SRRT_HUMAN  | 0.04719925 | 0.40256184 |
| sp P11171-7 41_HUMAN    | 0.04776573 | 1.2095301  |
| sp P62081 RS7_HUMAN     | 0.04823875 | 0.09894868 |
| sp P19404 NDUV2_HUMAN   | 0.04848099 | 0.312067   |
| sp Q9BRF8-2 CPPED_HUMAN | 0.04894257 | 0.43633315 |

|                         |            |            |
|-------------------------|------------|------------|
| sp Q9UJU6-2 DBNL_HUMAN  | 0.04928207 | 0.06291623 |
| sp Q13885 TBB2A_HUMAN   | 0.04940414 | 0          |
| sp P18669 PGAM1_HUMAN   | 0.04965019 | 0.4488957  |
| sp P17174 AATC_HUMAN    | 0.04995346 | 0.897507   |
| sp P61163 ACTZ_HUMAN    | 0.05005264 | 0.30372584 |
| sp P09496-2 CLCA_HUMAN  | 0.05059242 | 0.09750395 |
| sp P07195 LDHB_HUMAN    | 0.05081558 | 0.4488957  |
| sp P61247 RS3A_HUMAN    | 0.05082703 | 0.95332193 |
| sp Q9NX63 MIC19_HUMAN   | 0.05184937 | 0          |
| sp Q16851 UGPA_HUMAN    | 0.05190659 | 0.06644611 |
| sp P14314-2 GLU2B_HUMAN | 0.05222321 | 1.0992733  |
| sp Q15005 SPCS2_HUMAN   | 0.05226135 | 0.35795313 |
| sp P23396 RS3_HUMAN     | 0.05293083 | 1.2669417  |
| sp Q13724-2 MOGS_HUMAN  | 0.05331993 | 0.05145278 |
| sp P69891 HBG1_HUMAN    | 0.0533905  | 0.656254   |
| sp O60763-2 USO1_HUMAN  | 0.05361557 | 0.3516469  |
| sp P51991 ROA3_HUMAN    | 0.05365372 | 0.1342476  |
| sp Q7Z7G0 TARSH_HUMAN   | 0.05392456 | 0.19149946 |
| sp Q9BRA2 TXD17_HUMAN   | 0.05410385 | 0.1342476  |
| sp Q9UNE7-2 CHIP_HUMAN  | 0.05423355 | 0.19149946 |
| sp O75746-2 CMC1_HUMAN  | 0.05453682 | 0.09894868 |
| sp Q9UBE0 SAE1_HUMAN    | 0.0547781  | 0.28516325 |
| sp P26639-2 SYTC_HUMAN  | 0.0554657  | 0.22362706 |
| sp Q9Y639-4 NPTN_HUMAN  | 0.05578613 | 0          |
| sp O95479 G6PE_HUMAN    | 0.05582047 | 0          |
| sp P61803 DAD1_HUMAN    | 0.0562973  | 0          |
| sp O95394-3 AGM1_HUMAN  | 0.0563488  | 0          |
| sp P30837 AL1B1_HUMAN   | 0.05654717 | 0.09339783 |
| sp P13639 EF2_HUMAN     | 0.05683327 | 0.39459047 |
| sp P49458 SRP09_HUMAN   | 0.0571003  | 0          |
| sp Q15149-3 PLEC_HUMAN  | 0.05733299 | 0.656254   |
| sp Q13247-3 SRSF6_HUMAN | 0.05754662 | 0.19149946 |
| sp Q9Y6C2 EMIL1_HUMAN   | 0.05785942 | 0.64083964 |
| sp O60664-4 PLIN3_HUMAN | 0.05792236 | 0.65625405 |
| sp P57737-4 CORO7_HUMAN | 0.05827236 | 0.45033538 |
| sp O14936-2 CSKP_HUMAN  | 0.05860996 | 0.14672586 |
| sp P00740 FA9_HUMAN     | 0.059412   | 0          |
| sp P48444 COPD_HUMAN    | 0.05976105 | 0.7223306  |
| sp O75503 CLN5_HUMAN    | 0.0600071  | 0.2178309  |
| sp P63027 VAMP2_HUMAN   | 0.06035614 | 0          |
| sp P55145 MANF_HUMAN    | 0.06132317 | 0.7827403  |
| sp Q9H4G4 GAPR1_HUMAN   | 0.0621109  | 0.2178309  |
| sp P31146 COR1A_HUMAN   | 0.06214142 | 0.9764444  |
| sp P53992 SC24C_HUMAN   | 0.0626049  | 0.1342476  |
| sp Q9P2X0-2 DPM3_HUMAN  | 0.06373787 | 0          |



|                           |            |            |
|---------------------------|------------|------------|
| sp Q9NZB2-6 F120A_HUMAN   | 0.06434059 | 0.312067   |
| sp A0A0C4DH31 HV118_HUMAN | 0.06534576 | 0          |
| sp Q9NZ01 TECR_HUMAN      | 0.0655756  | 0.7588735  |
| sp Q96HY6 DDR GK_HUMAN    | 0.06646919 | 0.656254   |
| sp P13716-2 HEM2_HUMAN    | 0.0670948  | 0.5283125  |
| sp P23083 HV102_HUMAN     | 0.06715012 | 0          |
| sp P27338 AOFB_HUMAN      | 0.06744576 | 0.27686286 |
| sp P62277 RS13_HUMAN      | 0.06745338 | 0.8983557  |
| sp P09543-2 CN37_HUMAN    | 0.06770706 | 0.3005443  |
| sp P22102 PUR2_HUMAN      | 0.06850243 | 0.21439649 |
| sp P24534 EF1B_HUMAN      | 0.06903648 | 0.19149946 |
| sp P30613-2 KPYR_HUMAN    | 0.06912041 | 0.656254   |
| sp Q13630 FCL_HUMAN       | 0.07008934 | 0          |
| sp O14791-2 APOL1_HUMAN   | 0.07025147 | 0.19149946 |
| sp Q09028-3 RBBP4_HUMAN   | 0.07098389 | 0.656254   |
| sp Q15019-2 SEPT2_HUMAN   | 0.07228851 | 0.771065   |
| sp P63151-2 2ABA_HUMAN    | 0.07284355 | 0.312067   |
| sp P07814 SYEP_HUMAN      | 0.07522965 | 0.5283125  |
| sp P12814 ACTN1_HUMAN     | 0.0757103  | 0          |
| sp P21912 SDHB_HUMAN      | 0.07612038 | 0.7061832  |
| sp Q15257-2 PTPA_HUMAN    | 0.07618141 | 0.4075265  |
| sp Q9Y5S9-2 RBM8A_HUMAN   | 0.07631016 | 0.5204253  |
| sp P30519 HMOX2_HUMAN     | 0.07645035 | 0          |
| sp P43686 PRS6B_HUMAN     | 0.07771206 | 0.10138063 |
| sp P48147 PPCE_HUMAN      | 0.07792282 | 0.27902296 |
| sp Q9HC38 GLOD4_HUMAN     | 0.07801628 | 0.48757824 |
| sp Q00341-2 VIGLN_HUMAN   | 0.07844162 | 0.27902296 |
| sp P01034 CYTC_HUMAN      | 0.07861328 | 0.45033538 |
| sp P63267 ACTH_HUMAN      | 0.07891083 | 0.656254   |
| sp Q99798 ACON_HUMAN      | 0.07900047 | 0.20517272 |
| sp P25398 RS12_HUMAN      | 0.07924271 | 0.6115017  |
| sp P16615 AT2A2_HUMAN     | 0.07971001 | 0.57727534 |
| sp P78406 RAE1L_HUMAN     | 0.08184433 | 0          |
| sp O15061 SYNEM_HUMAN     | 0.08187676 | 0.65625405 |
| sp Q15661 TRYB1_HUMAN     | 0.0819397  | 0.5176613  |
| sp P31689-2 DNJA1_HUMAN   | 0.08240509 | 0.45033538 |
| sp P40763-3 STAT3_HUMAN   | 0.08269119 | 0.40256184 |
| sp Q9UGI8-2 TES_HUMAN     | 0.08270454 | 1.2954973  |
| sp P52306-4 GDS1_HUMAN    | 0.08348846 | 0.5204253  |
| sp Q96AE4-2 FUBP1_HUMAN   | 0.08349419 | 0.95533764 |
| sp P53621-2 COPA_HUMAN    | 0.08400345 | 0.3555403  |
| sp P55795 HNRH2_HUMAN     | 0.08461952 | 0.6298893  |
| sp Q9UNH7-2 SNX6_HUMAN    | 0.08496094 | 0          |
| sp A0AVT1 UBA6_HUMAN      | 0.08568764 | 0.1342476  |
| sp Q16555 DPYL2_HUMAN     | 0.08603287 | 0.28339192 |

|                         |            |            |
|-------------------------|------------|------------|
| sp Q9UBS4 DJB11_HUMAN   | 0.08604622 | 0.45033538 |
| sp Q92945 FUBP2_HUMAN   | 0.08635521 | 0.52598757 |
| sp P13010 XRCC5_HUMAN   | 0.08901405 | 0.36969694 |
| sp Q08431 MFGM_HUMAN    | 0.0891571  | 0.35795313 |
| sp O14974-3 MYPT1_HUMAN | 0.09013367 | 0.84879977 |
| sp Q9Y678 COPG1_HUMAN   | 0.0915432  | 0.81613266 |
| sp P02760 AMBP_HUMAN    | 0.09161568 | 0.8059303  |
| sp Q63ZY3-3 KANK2_HUMAN | 0.09178925 | 0.56808305 |
| sp Q6PCB0 VWA1_HUMAN    | 0.09190941 | 0.61034113 |
| sp Q9UBQ7 GRHPR_HUMAN   | 0.09210205 | 0.25789237 |
| sp O60547-2 GMDS_HUMAN  | 0.09236908 | 0.7061832  |
| sp Q9Y230 RUVB2_HUMAN   | 0.0927105  | 0.08449883 |
| sp Q5JRX3-3 PREP_HUMAN  | 0.09334946 | 1.1932944  |
| sp P35908 K22E_HUMAN    | 0.09469986 | 0.5025228  |
| sp Q93009-3 UBP7_HUMAN  | 0.09488297 | 0.19149946 |
| sp P60228 EIF3E_HUMAN   | 0.09569168 | 1.0485198  |
| sp P61353 RL27_HUMAN    | 0.09589005 | 1.1932944  |
| sp P51884 LUM_HUMAN     | 0.0963707  | 0.8898569  |
| sp P46783 RS10_HUMAN    | 0.09718514 | 0.45033538 |
| sp P21266 GSTM3_HUMAN   | 0.09727097 | 0.93112767 |
| sp Q6UW68 TM205_HUMAN   | 0.09753799 | 0.7827403  |
| sp Q15274 NADC_HUMAN    | 0.09959412 | 0.35795313 |
| sp P05155-2 IC1_HUMAN   | 0.1000824  | 0.45033538 |
| sp P05165-2 PCCA_HUMAN  | 0.1020813  | 1.1073172  |
| sp Q13200 PSMD2_HUMAN   | 0.10212898 | 0.2178309  |
| sp Q9NRV9 HEBP1_HUMAN   | 0.10293579 | 1.0485198  |
| sp O60506-3 HNRPQ_HUMAN | 0.10312653 | 0.6298893  |
| sp Q9H2D6-2 TARA_HUMAN  | 0.10355759 | 1.0645995  |
| sp P36871 PGM1_HUMAN    | 0.10406494 | 0          |
| sp Q9HD45 TM9S3_HUMAN   | 0.10450363 | 0          |
| sp Q07960 RHG01_HUMAN   | 0.10606766 | 1.120602   |
| sp Q13838-2 DX39B_HUMAN | 0.10643768 | 1.2095301  |
| sp Q13596-2 SNX1_HUMAN  | 0.10665894 | 0          |
| sp P27918 PROP_HUMAN    | 0.10770798 | 0.19149946 |
| sp P50454 SERPH_HUMAN   | 0.10779381 | 0.84879977 |
| sp P55058 PLTP_HUMAN    | 0.10789108 | 0.19149946 |
| sp Q92747 ARC1A_HUMAN   | 0.10928726 | 0          |
| sp Q9P2T1-2 GMPR2_HUMAN | 0.10967827 | 0.70235044 |
| sp Q7L576 CYFP1_HUMAN   | 0.10975456 | 0.312067   |
| sp P00441 SODC_HUMAN    | 0.11000824 | 0.84879977 |
| sp Q14914-2 PTGR1_HUMAN | 0.11235809 | 0          |
| sp P34932 HSP74_HUMAN   | 0.11249352 | 0.67256224 |
| sp Q13642-1 FHL1_HUMAN  | 0.11410713 | 0.656254   |
| sp Q9P258 RCC2_HUMAN    | 0.11423874 | 0.7588735  |
| sp P62140 PP1B_HUMAN    | 0.11433792 | 0.35795313 |

|                         |            |            |
|-------------------------|------------|------------|
| sp Q8TD19 NEK9_HUMAN    | 0.11474037 | 0.45033538 |
| sp Q9NR45 SIAS_HUMAN    | 0.11583901 | 0.7114226  |
| sp O60831 PRAF2_HUMAN   | 0.11603737 | 0.91601294 |
| sp O75306-2 NDUS2_HUMAN | 0.11604214 | 1.2095301  |
| sp P22352 GPX3_HUMAN    | 0.11749077 | 0.5204253  |
| sp P62857 RS28_HUMAN    | 0.11828232 | 0.5204253  |
| sp P50395 GDIB_HUMAN    | 0.12011147 | 0.2005696  |
| sp Q14258 TRI25_HUMAN   | 0.12201309 | 1.2392054  |
| sp Q9BR76 COR1B_HUMAN   | 0.12316322 | 0.2591514  |
| sp P05452 TETN_HUMAN    | 0.12491226 | 0.5204253  |
| sp O43396 TXNL1_HUMAN   | 0.12552261 | 0          |
| sp Q9Y5Z4 HEBP2_HUMAN   | 0.12642479 | 1.2773042  |
| sp P55735-2 SEC13_HUMAN | 0.12724876 | 0.8983557  |
| sp P51991-2 ROA3_HUMAN  | 0.12728119 | 0          |
| sp Q06278 AOXA_HUMAN    | 0.12758064 | 0.45033538 |
| sp P62917 RL8_HUMAN     | 0.12782669 | 0.95332193 |
| sp Q16787-3 LAMA3_HUMAN | 0.12856483 | 0.656254   |
| sp Q9C0C2 TB182_HUMAN   | 0.12984657 | 1.0634323  |
| sp Q96M27-3 PRRC1_HUMAN | 0.12997341 | 0.45033538 |
| sp Q9GZM7-3 TINAL_HUMAN | 0.13040543 | 0          |
| sp P53602 MVD1_HUMAN    | 0.13089752 | 0.09894868 |
| sp Q15293 RCN1_HUMAN    | 0.13171577 | 0.84879977 |
| sp P36269-3 GGT5_HUMAN  | 0.13200665 | 0.9533461  |
| sp P12268 IMDH2_HUMAN   | 0.13424683 | 0.7827403  |
| sp P21399 ACOC_HUMAN    | 0.13466358 | 0.83646035 |
| sp P09012 SNRPA_HUMAN   | 0.13475418 | 0.6070219  |
| sp P12956 XRCC6_HUMAN   | 0.1351757  | 1.2191175  |
| sp Q12792-3 TWF1_HUMAN  | 0.13543701 | 0.7827403  |
| sp P10644 KAPO_HUMAN    | 0.1371994  | 0.312067   |
| sp Q03113 GNA12_HUMAN   | 0.13757896 | 0.656254   |
| sp P08185 CBG_HUMAN     | 0.138031   | 1.1932944  |
| sp P15880 RS2_HUMAN     | 0.13851738 | 0.6298893  |
| sp Q15637-2 SF01_HUMAN  | 0.1405487  | 1.1932944  |
| sp P29144 TPP2_HUMAN    | 0.14171982 | 0.61034113 |
| sp Q93034 CUL5_HUMAN    | 0.14255524 | 0.19149946 |
| sp P53618 COPB_HUMAN    | 0.14258003 | 1.0604883  |
| sp Q9BUT1 BDH2_HUMAN    | 0.14411736 | 1.120602   |
| sp Q99426 TBCB_HUMAN    | 0.14556885 | 0.7061832  |
| sp P31150 GDIA_HUMAN    | 0.14625168 | 0.3516469  |
| sp P04062-2 GLCM_HUMAN  | 0.14670753 | 0.45033538 |
| sp P11940-2 PABP1_HUMAN | 0.14828491 | 1.1505735  |
| sp Q04446 GLGB_HUMAN    | 0.14934158 | 0          |
| sp O95302-3 FKBP9_HUMAN | 0.15023041 | 0.7827403  |
| BirA-TRIP6_BirAT6       | 0.15033245 | 0.19149946 |
| sp P55809 SCOT1_HUMAN   | 0.15109825 | 0.35795313 |

|                           |            |            |
|---------------------------|------------|------------|
| sp Q9NSK0-5 KLC4_HUMAN    | 0.15120506 | 0.656254   |
| sp P24821-4 TENA_HUMAN    | 0.15139961 | 0.907945   |
| sp P39023 RL3_HUMAN       | 0.1514206  | 0.5111962  |
| sp P84085 ARF5_HUMAN      | 0.15215874 | 0.656254   |
| sp P07360 CO8G_HUMAN      | 0.1527977  | 0.7827403  |
| sp P14550 AK1A1_HUMAN     | 0.15385818 | 0.6385048  |
| sp P11678 PERE_HUMAN      | 0.15507889 | 0.28516325 |
| sp Q9UHB6-4 LIMA1_HUMAN   | 0.15666962 | 0.7588735  |
| sp P42226 STAT6_HUMAN     | 0.15782166 | 0          |
| sp P60660-2 MYL6_HUMAN    | 0.15930367 | 0.7827403  |
| sp O75828 CBR3_HUMAN      | 0.15983582 | 0          |
| sp O60832 DKC1_HUMAN      | 0.16145897 | 1.1932944  |
| sp P32969 RL9_HUMAN       | 0.16238976 | 0.91601294 |
| sp A0A0C4DH38 HV551_HUMAN | 0.16260147 | 1.1932944  |
| sp P07357 CO8A_HUMAN      | 0.16570282 | 0.95332193 |
| sp O43852-3 CALU_HUMAN    | 0.1672802  | 0.5111962  |
| sp Q9UJZ1-2 STML2_HUMAN   | 0.16790009 | 0.35795313 |
| sp P98082-2 DAB2_HUMAN    | 0.1694336  | 1.1932944  |
| sp P46781 RS9_HUMAN       | 0.17037201 | 0.8339169  |
| sp P28161 GSTM2_HUMAN     | 0.17126656 | 0.656254   |
| sp P31321 KAP1_HUMAN      | 0.17234612 | 0.656254   |
| sp Q9C0E8-4 LNP_HUMAN     | 0.17348099 | 0.19149946 |
| sp P13693 TCTP_HUMAN      | 0.1741333  | 1.1932944  |
| sp Q99733-2 NP1L4_HUMAN   | 0.17434025 | 0.48520416 |
| sp Q96D15 RCN3_HUMAN      | 0.17623234 | 0.80804527 |
| sp P09871 C1S_HUMAN       | 0.17664146 | 0          |
| sp P52895 AK1C2_HUMAN     | 0.17729282 | 0          |
| sp O60610-2 DIAP1_HUMAN   | 0.17787838 | 0.6298893  |
| sp O94855-2 SC24D_HUMAN   | 0.17914963 | 0          |
| sp P07951-3 TPM2_HUMAN    | 0.18091393 | 0.30372584 |
| sp P0CG38 POTEI_HUMAN     | 0.18518639 | 0.656254   |
| sp P62714 PP2AB_HUMAN     | 0.18554306 | 0.656254   |
| sp O95861-4 BPNT1_HUMAN   | 0.18642807 | 0.30372584 |
| sp P18583-10 SON_HUMAN    | 0.18720245 | 0.6070219  |
| sp P46821 MAP1B_HUMAN     | 0.19052696 | 0.7588735  |
| sp P84098 RL19_HUMAN      | 0.1905613  | 0.7827403  |
| sp Q99538-2 LGMN_HUMAN    | 0.19428825 | 1.1932944  |
| sp P02753 RET4_HUMAN      | 0.19549942 | 1.0301651  |
| sp Q9BTE3-2 MCMBP_HUMAN   | 0.19579887 | 0.45033538 |
| sp P62195 PRS8_HUMAN      | 0.19704437 | 0.7827403  |
| sp P63241 IF5A1_HUMAN     | 0.19750786 | 0.656254   |
| sp O00483 NDUA4_HUMAN     | 0.19888687 | 1.1932944  |
| sp O00233-2 PSMD9_HUMAN   | 0.200037   | 1.1932944  |
| sp Q06828 FMOD_HUMAN      | 0.20061493 | 1.1932944  |
| sp Q9HCN8 SDF2L_HUMAN     | 0.20548248 | 0.7827403  |

|                           |            |            |
|---------------------------|------------|------------|
| sp P04406 G3P_HUMAN       | 0.2058487  | 0.656254   |
| sp Q15436 SC23A_HUMAN     | 0.20792294 | 0.1342476  |
| sp P0C0L5 CO4B_HUMAN      | 0.20871735 | 1.1932944  |
| sp P43243 MATR3_HUMAN     | 0.20907593 | 0.95332193 |
| sp Q9BX97 PLVAP_HUMAN     | 0.21100616 | 0          |
| sp P62913-2 RL11_HUMAN    | 0.21405983 | 1.1932944  |
| sp O43294 TGFI1_HUMAN     | 0.21412277 | 1.1932944  |
| sp Q9BW30 TPPP3_HUMAN     | 0.21626854 | 0          |
| sp P01892 1A02_HUMAN      | 0.21832275 | 0.91601294 |
| sp Q9H008 LHPP_HUMAN      | 0.21845436 | 0.7957244  |
| sp Q8TAQ2-2 SMRC2_HUMAN   | 0.21977234 | 0.2178309  |
| sp P62191-2 PRS4_HUMAN    | 0.22154236 | 0.7061832  |
| sp Q00796 DHSO_HUMAN      | 0.22399521 | 1.1505735  |
| sp Q9UNS2 CSN3_HUMAN      | 0.22559929 | 0.656254   |
| sp P60981 DEST_HUMAN      | 0.22732544 | 0.84879977 |
| sp Q53GG5-2 PDLI3_HUMAN   | 0.22751236 | 1.0485198  |
| sp P14618-2 KPYM_HUMAN    | 0.23034859 | 0.5204253  |
| sp Q99961-3 SH3G1_HUMAN   | 0.23050499 | 0.656254   |
| sp P60891 PRPS1_HUMAN     | 0.23163986 | 0.656254   |
| sp P62854 RS26_HUMAN      | 0.2372818  | 0.7827403  |
| sp A0A0B4J1X8 HV343_HUMAN | 0.23983383 | 0          |
| sp Q15437 SC23B_HUMAN     | 0.24015236 | 0.656254   |
| sp Q96PD5-2 PGRP2_HUMAN   | 0.24511719 | 1.1276597  |
| sp P40261 NNMT_HUMAN      | 0.2456665  | 0.91601294 |
| sp P02749 APOH_HUMAN      | 0.24912262 | 0.27902296 |
| sp P02765 FETUA_HUMAN     | 0.24927711 | 1.0353775  |
| sp P20810-4 ICAL_HUMAN    | 0.2506237  | 0.91601294 |
| sp Q8TD06 AGR3_HUMAN      | 0.25260544 | 0          |
| sp Q03519 TAP2_HUMAN      | 0.25284576 | 0.656254   |
| sp Q13310-2 PABP4_HUMAN   | 0.2568798  | 0.656254   |
| sp P31947 1433S_HUMAN     | 0.25946426 | 0.6298893  |
| sp P62736 ACTA_HUMAN      | 0.26127052 | 0.656254   |
| sp P62249 RS16_HUMAN      | 0.26145363 | 0.91601294 |
| sp P12814-2 ACTN1_HUMAN   | 0.2649994  | 1.1932944  |
| sp P02766 TTHY_HUMAN      | 0.26673126 | 1.0485198  |
| sp P02747 C1QC_HUMAN      | 0.27113533 | 1.1932944  |
| sp P27635 RL10_HUMAN      | 0.28592682 | 0.656254   |
| sp Q71UM5 RS27L_HUMAN     | 0.28954506 | 1.1932944  |
| sp P62910 RL32_HUMAN      | 0.29045105 | 1.1932944  |
| sp P46977 STT3A_HUMAN     | 0.2950592  | 1.1932944  |
| sp Q9BWS9-3 CHID1_HUMAN   | 0.29943848 | 0.656254   |
| sp O60825-2 F262_HUMAN    | 0.30013275 | 0.656254   |
| sp Q7Z4H8 PLGT3_HUMAN     | 0.30786133 | 0.656254   |
| sp P39059 COFA1_HUMAN     | 0.30911255 | 1.2095301  |
| sp P12111-4 CO6A3_HUMAN   | 0.3194294  | 0.656254   |

|                           |            |            |
|---------------------------|------------|------------|
| sp Q8TBC4-2 UBA3_HUMAN    | 0.32211685 | 0.7827403  |
| sp Q9Y5P6-2 GMPPB_HUMAN   | 0.32845116 | 0.35795313 |
| sp P0DOX3 IGD_HUMAN       | 0.33233833 | 0.656254   |
| sp P14207 FOLR2_HUMAN     | 0.33938026 | 0.656254   |
| sp Q96AY3 FKB10_HUMAN     | 0.34247208 | 1.1932944  |
| sp O75533 SF3B1_HUMAN     | 0.34399223 | 1.1932944  |
| sp Q687X5 STE4_HUMAN      | 0.34662247 | 1.1932944  |
| sp Q08379 GOGA2_HUMAN     | 0.3489027  | 1.1932944  |
| sp P16104 H2AX_HUMAN      | 0.3490486  | 0          |
| sp Q9NR56-2 MBNL1_HUMAN   | 0.35448837 | 1.1932944  |
| sp Q14141-2 SEPT6_HUMAN   | 0.3569088  | 0.656254   |
| sp Q8WX93-5 PALLD_HUMAN   | 0.36261177 | 0.7061832  |
| sp P62829 RL23_HUMAN      | 0.38051224 | 1.1932944  |
| sp A0A0C4DH29 HV103_HUMAN | 0.39317703 | 0.656254   |
| sp Q92599-3 SEPT8_HUMAN   | 0.39941406 | 1.1932944  |
| sp P0DOX2 IGA2_HUMAN      | 0.40577507 | 1.1505735  |
| sp Q15046 SYK_HUMAN       | 0.4100952  | 0.656254   |
| sp P02746 C1QB_HUMAN      | 0.414196   | 1.1932944  |
| sp P62633-3 CNBP_HUMAN    | 0.44272327 | 1.1932944  |
| sp P01619 KV320_HUMAN     | 0.44629288 | 0.656254   |
| sp P00738 HPT_HUMAN       | 0.4470272  | 0.656254   |
| sp Q14697 GANAB_HUMAN     | 0.4565487  | 1.1932944  |
| sp P08779 K1C16_HUMAN     | 0.45977783 | 1.1932944  |
| sp P0COL4 CO4A_HUMAN      | 0.46147156 | 1.1932944  |
| sp P02751-15 FINC_HUMAN   | 0.46273994 | 0.656254   |
| sp P0DOX7 IGK_HUMAN       | 0.46954536 | 1.2095301  |
| sp P35637-2 FUS_HUMAN     | 0.47401237 | 1.1932944  |
| sp P69892 HBG2_HUMAN      | 0.4740162  | 0.656254   |
| sp P47895 AL1A3_HUMAN     | 0.50132847 | 0.656254   |
| sp P35542 SAA4_HUMAN      | 0.5135155  | 1.1932944  |
| sp Q14894 CRYM_HUMAN      | 0.5332279  | 0.7827403  |
| sp Q05682 CALD1_HUMAN     | 0.53640175 | 1.1505735  |
| sp P35080-2 PROF2_HUMAN   | 0.5511799  | 0.656254   |
| sp P50135 HNMT_HUMAN      | 0.55207825 | 1.1932944  |
| sp Q96HC4 PDLI5_HUMAN     | 0.5705948  | 0.656254   |
| sp Q15063-3 POSTN_HUMAN   | 0.6360855  | 1.1932944  |
| sp P01782 HV309_HUMAN     | 0.6711464  | 0.656254   |
| sp P0DP03 HV335_HUMAN     | 0.69286346 | 1.1932944  |
| sp P01624 KV315_HUMAN     | 0.7023983  | 1.1932944  |
| sp O76011 KRT34_HUMAN     | 0.70775795 | 0.656254   |
| sp P48741 HSP77_HUMAN     | 0.72177505 | 0.656254   |
| sp P61018-2 RAB4B_HUMAN   | 0.78552246 | 0.656254   |
| sp A0A0C4DH25 KVD20_HUMAN | 0.8185253  | 0.656254   |
| sp A0A0C4DH41 HV461_HUMAN | 0.84370804 | 0.656254   |
| sp Q03591 FHR1_HUMAN      | 0.85528183 | 1.1932944  |

|                           |            |            |
|---------------------------|------------|------------|
| sp Q15063-2 POSTN_HUMAN   | 0.8555012  | 0.656254   |
| sp P02533 K1C14_HUMAN     | 0.889966   | 0.45033538 |
| sp P02461 CO3A1_HUMAN     | 0.89585686 | 1.1932944  |
| sp P01591 IGJ_HUMAN       | 0.9861374  | 1.1932944  |
| sp P01834 IGKC_HUMAN      | 1.0725155  | 1.1932944  |
| sp Q13976-2 KGP1_HUMAN    | 1.1705475  | 0.656254   |
| sp P01780 HV307_HUMAN     | 1.2133827  | 0.656254   |
| sp A0A075B6P5 KV228_HUMAN | 1.2322216  | 0.656254   |
| sp P06310 KV230_HUMAN     | 1.8338547  | 0.656254   |
| sp P20039 2B1B_HUMAN      | 1.914423   | 0.656254   |
