# Supplementary material for: Peptidylarginine deiminase 2 citrullinates MZB1 and promotes the secretion of IgM and IgA
Source: PubMed Central journal article supplement (PMC10716219; doi:10.3389/fimmu.2023.1290585), 2023-11-29
Supplement: DataSheet_9.pdf [file DataSheet_9.pdf]

## Supplemental Table 9: IPF3 vs controls

| Accession #             | Fold Change | p value (-log <sub>10</sub> ) |
|-------------------------|-------------|-------------------------------|
| sp P12429 ANXA3_HUMAN   | -1.6271172  | 7.665951                      |
| sp Q15109-10 RAGE_HUMAN | -1.5686646  | 2.1818786                     |
| sp P22748 CAH4_HUMAN    | -1.4466152  | 2.6576471                     |
| sp Q13510-2 ASAH1_HUMAN | -1.3556271  | 6.3204336                     |
| sp P31947 1433S_HUMAN   | -1.3444767  | 2.1818786                     |
| sp O96009 NAPSA_HUMAN   | -1.3268375  | 2.6576471                     |
| sp Q10589-2 BST2_HUMAN  | -1.3022957  | 1.6960104                     |
| sp Q9NZA1-2 CLIC5_HUMAN | -1.2464657  | 3.5908275                     |
| sp P09668 CATH_HUMAN    | -1.2287712  | 3.218121                      |
| sp P49407-2 ARRB1_HUMAN | -1.2282457  | 2.6576471                     |
| sp P05141 ADT2_HUMAN    | -1.2128143  | 2.6576471                     |
| sp P62805 H4_HUMAN      | -1.2096996  | 6.3204336                     |
| sp Q01469 FABP5_HUMAN   | -1.2020054  | 4.051346                      |
| sp P07339 CATD_HUMAN    | -1.1577797  | 8.112776                      |
| sp P59665 DEF1_HUMAN    | -1.1527138  | 2.1818786                     |
| sp P99999 CYC_HUMAN     | -1.1524124  | 2.1818786                     |
| sp P05091 ALDH2_HUMAN   | -1.1451511  | 9.04321                       |
| sp O43760-2 SNG2_HUMAN  | -1.1372395  | 1.6960104                     |
| sp P21397 AOFA_HUMAN    | -1.1177063  | 5.869831                      |
| sp P08729 K2C7_HUMAN    | -1.1137123  | 14.311137                     |
| sp O95810 CAVN2_HUMAN   | -1.0748329  | 3.7803535                     |
| sp P31949 S10AB_HUMAN   | -1.0689125  | 2.6576471                     |
| sp P84103-2 SRSF3_HUMAN | -1.0538063  | 3.1266599                     |
| sp P02788 TRFL_HUMAN    | -1.0407887  | 15.051499                     |
| sp Q6NUK1-2 SCMC1_HUMAN | -1.0320415  | 2.6576471                     |
| sp P35241 RADI_HUMAN    | -1.0239401  | 3.5908275                     |
| sp P50895 BCAM_HUMAN    | -1.0207748  | 5.1321483                     |
| sp P05362 ICAM1_HUMAN   | -1.0161095  | 4.247887                      |
| sp P00325 ADH1B_HUMAN   | -1.0047016  | 4.051346                      |
| sp Q96TA1-2 NIBL1_HUMAN | -1.0021286  | 2.7624686                     |
| sp P09758 TACD2_HUMAN   | -0.9999943  | 2.1818786                     |
| sp P51659 DHB4_HUMAN    | -0.9987984  | 10.489762                     |
| sp P40121 CAPG_HUMAN    | -0.9936905  | 5.180782                      |
| sp Q16698-2 DECR_HUMAN  | -0.9910545  | 3.3283036                     |
| sp O00743-3 PPP6_HUMAN  | -0.9844971  | 1.6960104                     |
| sp Q8WWI1-5 LMO7_HUMAN  | -0.9769344  | 2.3787699                     |
| sp Q9UPQ0 LIMC1_HUMAN   | -0.9669437  | 1.9951487                     |
| sp P51149 RAB7A_HUMAN   | -0.9643917  | 4.044672                      |
| sp P29401-2 TKT_HUMAN   | -0.9531841  | 12.078198                     |
| sp P04179-4 SODM_HUMAN  | -0.9256954  | 3.1266599                     |
| sp P49756 RBM25_HUMAN   | -0.9176559  | 1.6960104                     |
| sp P09467 F16P1_HUMAN   | -0.9150848  | 3.5442007                     |
| sp P01903 DRA_HUMAN     | -0.9133682  | 2.1818786                     |

|                         |            |           |
|-------------------------|------------|-----------|
| sp P84090 ERH_HUMAN     | -0.895052  | 2.1818786 |
| sp P23381 SYWC_HUMAN    | -0.8869019 | 4.7413087 |
| sp O60814 H2B1K_HUMAN   | -0.8854408 | 1.4104178 |
| sp P60903 S10AA_HUMAN   | -0.8835373 | 1.6960104 |
| sp Q9Y624 JAM1_HUMAN    | -0.8819485 | 2.6576471 |
| sp P13073 COX41_HUMAN   | -0.8770142 | 1.6960104 |
| sp Q00325-2 MPCP_HUMAN  | -0.8701935 | 3.1266599 |
| sp P48735-2 IDHP_HUMAN  | -0.8642883 | 4.051346  |
| sp P09960 LKHA4_HUMAN   | -0.8636017 | 9.625019  |
| sp P05109 S10A8_HUMAN   | -0.8607922 | 3.5908275 |
| sp Q08722-2 CD47_HUMAN  | -0.8580704 | 1.6960104 |
| sp Q9HC35-2 EMAL4_HUMAN | -0.8539848 | 2.6576471 |
| sp P00505 AATM_HUMAN    | -0.8482266 | 4.8244376 |
| sp P41218 MNDA_HUMAN    | -0.8461285 | 2.1818786 |
| sp Q03135 CAV1_HUMAN    | -0.8460617 | 2.1818786 |
| sp P20292 AL5AP_HUMAN   | -0.8367462 | 1.4104178 |
| sp P61626 LYSC_HUMAN    | -0.8357964 | 2.6576471 |
| sp P40926 MDHM_HUMAN    | -0.8237    | 6.596239  |
| sp Q00765 REEP5_HUMAN   | -0.8226395 | 3.1266599 |
| sp P12821-2 ACE_HUMAN   | -0.8207836 | 2.6576471 |
| sp O00159-3 MYO1C_HUMAN | -0.8196411 | 6.5096054 |
| sp Q13751 LAMB3_HUMAN   | -0.8105183 | 1.6960104 |
| sp O75695 XRP2_HUMAN    | -0.8095589 | 1.6960104 |
| sp P02786 TFR1_HUMAN    | -0.8083725 | 4.051346  |
| sp Q15599-2 NHRF2_HUMAN | -0.8061409 | 1.6997428 |
| sp P11310-2 ACADM_HUMAN | -0.8020229 | 4.051346  |
| sp P05164-3 PERM_HUMAN  | -0.7909775 | 7.9773483 |
| sp Q6PIU2-2 NCEH1_HUMAN | -0.7890072 | 2.432837  |
| sp P25774 CATS_HUMAN    | -0.7850552 | 1.6960104 |
| sp P33121-3 ACSL1_HUMAN | -0.7844334 | 2.1818786 |
| sp P51648-2 AL3A2_HUMAN | -0.7693386 | 2.4829872 |
| sp Q9UHG3 PCYOX_HUMAN   | -0.7686997 | 4.247887  |
| sp P13796 PLSL_HUMAN    | -0.7679939 | 11.224656 |
| sp Q13740-2 CD166_HUMAN | -0.7621956 | 3.2925725 |
| sp P43304 GPDM_HUMAN    | -0.758297  | 2.8739974 |
| sp P05026-2 AT1B1_HUMAN | -0.756525  | 2.6576471 |
| sp P22626 ROA2_HUMAN    | -0.7515755 | 6.2055726 |
| sp P05023 AT1A1_HUMAN   | -0.7497368 | 7.6602716 |
| sp O60271-4 JIP4_HUMAN  | -0.7483597 | 1.6960104 |
| sp P11233 RALA_HUMAN    | -0.7421303 | 2.1818786 |
| sp Q07157 ZO1_HUMAN     | -0.7389755 | 4.964395  |
| sp P17931 LEG3_HUMAN    | -0.7385216 | 2.6576471 |
| sp O95340-2 PAPS2_HUMAN | -0.7363434 | 2.1818786 |
| sp Q9UGT4 SUSD2_HUMAN   | -0.7353687 | 2.151766  |
| sp Q6NZI2 CAVN1_HUMAN   | -0.7173271 | 6.3204336 |

|                         |            |           |
|-------------------------|------------|-----------|
| sp P50225 ST1A1_HUMAN   | -0.7158432 | 1.6960104 |
| sp P23246 SFPQ_HUMAN    | -0.7128372 | 4.044672  |
| sp P10515 ODP2_HUMAN    | -0.7115688 | 2.6576471 |
| sp P36957 ODO2_HUMAN    | -0.7102165 | 2.923088  |
| sp O43707 ACTN4_HUMAN   | -0.7097054 | 13.694518 |
| sp Q13011 ECH1_HUMAN    | -0.7070198 | 4.964395  |
| sp Q9ULV4-3 COR1C_HUMAN | -0.70051   | 3.342776  |
| sp P10253 LYAG_HUMAN    | -0.6992531 | 3.1266599 |
| sp P15311 EZRI_HUMAN    | -0.6930618 | 8.079533  |
| sp P00352 AL1A1_HUMAN   | -0.6922112 | 10.298183 |
| sp P09622 DLDH_HUMAN    | -0.6897411 | 3.673847  |
| sp O15143 ARC1B_HUMAN   | -0.6874962 | 2.3143692 |
| sp P29590 PML_HUMAN     | -0.6872349 | 2.5815322 |
| sp P63096 GNAI1_HUMAN   | -0.6827412 | 1.6960104 |
| sp Q9NZN4 EHD2_HUMAN    | -0.6799774 | 6.429521  |
| sp Q8TCJ2 STT3B_HUMAN   | -0.6791592 | 1.6960104 |
| sp P63092-3 GNAS2_HUMAN | -0.6781216 | 2.9310203 |
| sp P13804 ETFA_HUMAN    | -0.6759281 | 4.4116287 |
| sp O95994 AGR2_HUMAN    | -0.6758099 | 2.6576471 |
| sp P19338 NUCL_HUMAN    | -0.6734963 | 8.112776  |
| sp Q8NF37 PCAT1_HUMAN   | -0.6704006 | 1.560883  |
| sp P53007 TXTP_HUMAN    | -0.6696415 | 2.6576471 |
| sp Q8N335 GPD1L_HUMAN   | -0.6686649 | 1.6960104 |
| sp P05107 ITB2_HUMAN    | -0.6658154 | 2.544769  |
| sp Q02252-2 MMSA_HUMAN  | -0.6604443 | 3.8337784 |
| sp P07988 PSPB_HUMAN    | -0.6563664 | 2.7624686 |
| sp P0DPI2-2 GAL3A_HUMAN | -0.6559296 | 1.6960104 |
| sp Q07955-3 SRSF1_HUMAN | -0.6551609 | 4.509013  |
| sp P61106 RAB14_HUMAN   | -0.655098  | 3.5098467 |
| sp Q9UL18 AGO1_HUMAN    | -0.6541824 | 1.4104178 |
| sp P51649-2 SSDH_HUMAN  | -0.6540051 | 2.1818786 |
| sp P62917 RL8_HUMAN     | -0.6529388 | 2.3143692 |
| sp P31040 SDHA_HUMAN    | -0.6509819 | 3.5945017 |
| sp P06702 S10A9_HUMAN   | -0.6508751 | 3.2221727 |
| sp P56199 ITA1_HUMAN    | -0.6478806 | 6.253077  |
| sp P37837 TALDO_HUMAN   | -0.6475067 | 6.458061  |
| sp P09110 THIK_HUMAN    | -0.6468315 | 1.9647322 |
| sp P40429 RL13A_HUMAN   | -0.6462536 | 1.6960104 |
| sp P16284-3 PECA1_HUMAN | -0.6451798 | 4.1424985 |
| sp Q8NBX0 SCPDL_HUMAN   | -0.6451035 | 1.6960104 |
| sp Q16762 THTR_HUMAN    | -0.6438599 | 1.9647322 |
| sp P61604 CH10_HUMAN    | -0.64361   | 3.1266599 |
| sp P22307-8 NLTP_HUMAN  | -0.6429863 | 1.6960104 |
| sp O75390 CISY_HUMAN    | -0.6414661 | 3.9403465 |
| sp Q04917 1433F_HUMAN   | -0.641449  | 5.417897  |

|                          |            |           |
|--------------------------|------------|-----------|
| sp Q02878 RL6_HUMAN      | -0.6405907 | 1.6960104 |
| sp P07099 HYEP_HUMAN     | -0.6376648 | 6.6615443 |
| sp Q9H0U4 RAB1B_HUMAN    | -0.6365671 | 1.6960104 |
| sp P42765 THIM_HUMAN     | -0.6338539 | 5.172756  |
| sp Q14118 DAG1_HUMAN     | -0.6327705 | 1.6960104 |
| sp P49591 SYSC_HUMAN     | -0.6277714 | 4.033051  |
| sp Q02543 RL18A_HUMAN    | -0.6266327 | 2.9807727 |
| sp P62906 RL10A_HUMAN    | -0.6222553 | 1.827201  |
| sp Q92597 NDRG1_HUMAN    | -0.6185532 | 2.1818786 |
| sp Q00839 HNRPU_HUMAN    | -0.6182785 | 3.863062  |
| sp P51991 ROA3_HUMAN     | -0.6115427 | 2.1818786 |
| sp P08575-10 PTPRC_HUMAN | -0.6091805 | 4.051346  |
| sp P04080 CYTB_HUMAN     | -0.6073475 | 1.6960104 |
| sp P62258 1433E_HUMAN    | -0.6066799 | 2.1818786 |
| sp P20700 LMNB1_HUMAN    | -0.6053047 | 10.772392 |
| sp P35222 CTNB1_HUMAN    | -0.6041012 | 2.3305986 |
| sp P51572-2 BAP31_HUMAN  | -0.5996628 | 3.342776  |
| sp P25786-2 PSA1_HUMAN   | -0.5980072 | 6.3204336 |
| sp Q9P0L0-2 VAPA_HUMAN   | -0.5947342 | 3.1266599 |
| sp P30040 ERP29_HUMAN    | -0.5939045 | 1.9413493 |
| sp Q02218-2 ODO1_HUMAN   | -0.5927277 | 3.218121  |
| sp P11177-3 ODPB_HUMAN   | -0.5917015 | 2.5461748 |
| sp P51858 HDGF_HUMAN     | -0.5907421 | 2.1818786 |
| sp P17844-2 DDX5_HUMAN   | -0.5899277 | 3.8337784 |
| sp P10606 COX5B_HUMAN    | -0.5897713 | 1.6960104 |
| sp P26447 S10A4_HUMAN    | -0.5887337 | 2.6576471 |
| sp Q9UBQ0-2 VPS29_HUMAN  | -0.5858364 | 1.6960104 |
| sp P07954-2 FUMH_HUMAN   | -0.5854607 | 2.6576471 |
| sp Q13228-4 SBP1_HUMAN   | -0.584137  | 11.398167 |
| sp Q15907-2 RB11B_HUMAN  | -0.5836983 | 2.1404836 |
| sp P30740 ILEU_HUMAN     | -0.5829735 | 2.044628  |
| sp Q92888-2 ARHG1_HUMAN  | -0.5812111 | 1.6960104 |
| sp P35221 CTNA1_HUMAN    | -0.578085  | 9.140666  |
| sp P07910-2 HNRPC_HUMAN  | -0.5765228 | 1.9647322 |
| sp P01833 PIGR_HUMAN     | -0.5708561 | 4.0843706 |
| sp Q92841-3 DDX17_HUMAN  | -0.5708427 | 4.5016932 |
| sp P38646 GRP75_HUMAN    | -0.5698547 | 5.0099254 |
| sp P46781 RS9_HUMAN      | -0.5681877 | 2.3047035 |
| sp P15121 ALDR_HUMAN     | -0.5681229 | 3.5844223 |
| sp P53597 SUCA_HUMAN     | -0.5677147 | 1.6960104 |
| sp P68366-2 TBA4A_HUMAN  | -0.5669346 | 1.9647322 |
| sp P24752 THIL_HUMAN     | -0.5645809 | 4.4994555 |
| sp P38606 VATA_HUMAN     | -0.5626392 | 1.3668759 |
| sp Q16836-3 HCDH_HUMAN   | -0.5614471 | 1.6960104 |
| sp P62873 GBB1_HUMAN     | -0.559927  | 3.4656596 |

|                         |            |           |
|-------------------------|------------|-----------|
| sp Q9UL25 RAB21_HUMAN   | -0.5594597 | 2.3143692 |
| sp P11413-2 G6PD_HUMAN  | -0.5579186 | 3.1629772 |
| sp P40939 ECHA_HUMAN    | -0.5563726 | 6.3886313 |
| sp P05556 ITB1_HUMAN    | -0.5558357 | 10.022388 |
| sp Q9UBQ7 GRHPR_HUMAN   | -0.5557499 | 1.7590232 |
| sp P07355-2 ANXA2_HUMAN | -0.5543556 | 2.894491  |
| sp Q14103-3 HNRPD_HUMAN | -0.5534134 | 3.3433785 |
| sp P08311 CATG_HUMAN    | -0.5497284 | 4.051346  |
| sp P43490 NAMPT_HUMAN   | -0.5478573 | 5.661589  |
| sp P10155 RO60_HUMAN    | -0.5469046 | 1.7713763 |
| sp P17655 CAN2_HUMAN    | -0.5465431 | 5.359168  |
| sp P35237 SPB6_HUMAN    | -0.5464973 | 5.186614  |
| sp P30048-2 PRDX3_HUMAN | -0.5459938 | 2.6576471 |
| sp P62249 RS16_HUMAN    | -0.5440321 | 1.6960104 |
| sp P21796 VDAC1_HUMAN   | -0.5438938 | 4.876761  |
| sp Q6YHK3 CD109_HUMAN   | -0.5420094 | 3.2450993 |
| sp Q06830 PRDX1_HUMAN   | -0.541563  | 5.417897  |
| sp O94760 DDAH1_HUMAN   | -0.539753  | 2.1818786 |
| sp P27824-2 CALX_HUMAN  | -0.5378075 | 1.5121045 |
| sp Q9Y6N5 SQOR_HUMAN    | -0.5369587 | 4.2164803 |
| sp P09211 GSTP1_HUMAN   | -0.5361996 | 4.0772076 |
| sp P49748-2 ACADV_HUMAN | -0.5334911 | 8.234994  |
| sp P43034 LIS1_HUMAN    | -0.5327892 | 3.1266599 |
| sp Q02978-2 M2OM_HUMAN  | -0.5325546 | 1.4104178 |
| sp P61421 VA0D1_HUMAN   | -0.5313129 | 2.653196  |
| sp P31146 COR1A_HUMAN   | -0.5305443 | 4.2427664 |
| sp P25788-2 PSA3_HUMAN  | -0.5284157 | 2.6576471 |
| sp P09525 ANXA4_HUMAN   | -0.5248528 | 5.2000947 |
| sp Q9H8H3 MET7A_HUMAN   | -0.5235882 | 1.6960104 |
| sp Q6WCQ1-2 MPRIP_HUMAN | -0.5232315 | 2.7472508 |
| sp Q9BR76 COR1B_HUMAN   | -0.5144768 | 3.4656596 |
| sp Q9UMS4 PRP19_HUMAN   | -0.5142098 | 2.6997027 |
| sp P55290-4 CAD13_HUMAN | -0.5123329 | 1.3815327 |
| sp Q9UFN0 NPS3A_HUMAN   | -0.5102501 | 1.6960104 |
| sp P14543-2 NID1_HUMAN  | -0.5098896 | 2.8734877 |
| sp P52272-2 HNRPM_HUMAN | -0.5071278 | 6.7073655 |
| sp P09651-3 ROA1_HUMAN  | -0.5067596 | 1.4104178 |
| sp P0DP25 CALM3_HUMAN   | -0.5067463 | 3.5908275 |
| sp O75874 IDHC_HUMAN    | -0.5065174 | 3.9658737 |
| sp P16435 NCPR_HUMAN    | -0.5039644 | 2.0265307 |
| sp P50213 IDH3A_HUMAN   | -0.5036717 | 3.1266599 |
| sp P15586-2 GNS_HUMAN   | -0.5032253 | 1.4104178 |
| sp P60900 PSA6_HUMAN    | -0.4990044 | 4.534284  |
| sp P62987 RL40_HUMAN    | -0.4950447 | 2.4829872 |
| sp O15230 LAMA5_HUMAN   | -0.4942703 | 4.2145605 |

|                         |            |           |
|-------------------------|------------|-----------|
| sp P22897 MRC1_HUMAN    | -0.4937077 | 3.9156206 |
| sp P08727 K1C19_HUMAN   | -0.4936409 | 7.1634564 |
| sp P10768 ESTD_HUMAN    | -0.4932575 | 1.8444856 |
| sp P14866-2 HNRPL_HUMAN | -0.489872  | 1.6960104 |
| sp P61158 ARP3_HUMAN    | -0.489357  | 6.4715614 |
| sp P23141-2 EST1_HUMAN  | -0.487812  | 9.673478  |
| sp Q00577 PURA_HUMAN    | -0.4877586 | 2.6576471 |
| sp P63104 1433Z_HUMAN   | -0.4873352 | 4.509013  |
| sp P02769 ALBU_BOVIN    | -0.4870682 | 2.1743186 |
| sp P08559-2 ODPA_HUMAN  | -0.4856815 | 3.8053288 |
| sp Q9HB40 RISC_HUMAN    | -0.4849854 | 1.6960104 |
| sp Q9NQR4 NIT2_HUMAN    | -0.4842644 | 2.6576471 |
| sp O00299 CLIC1_HUMAN   | -0.4842567 | 5.2234774 |
| sp P49327 FAS_HUMAN     | -0.482645  | 7.720088  |
| sp P00367 DHE3_HUMAN    | -0.48106   | 2.2535503 |
| sp Q9Y5P6-2 GMPPB_HUMAN | -0.4806042 | 1.6960104 |
| sp P0DMV9 HS71B_HUMAN   | -0.4769573 | 5.815963  |
| sp P28482 MK01_HUMAN    | -0.4749546 | 2.6576471 |
| sp Q15233 NONO_HUMAN    | -0.473938  | 4.044672  |
| sp P61247 RS3A_HUMAN    | -0.4736443 | 3.417183  |
| sp P07305-2 H10_HUMAN   | -0.4735203 | 1.6960104 |
| sp P37802 TAGL2_HUMAN   | -0.4734364 | 4.655308  |
| sp Q9UNF0-2 PACN2_HUMAN | -0.4719315 | 1.6997428 |
| sp P52209-2 6PGD_HUMAN  | -0.4718952 | 5.736467  |
| sp P46940 IQGA1_HUMAN   | -0.4718647 | 11.63615  |
| sp Q9P2R7-2 SUCB1_HUMAN | -0.4711552 | 2.3047035 |
| sp Q9H223 EHD4_HUMAN    | -0.4691925 | 2.7472508 |
| sp Q9BUJ2-4 HNRL1_HUMAN | -0.4669495 | 3.6087239 |
| sp Q07020-2 RL18_HUMAN  | -0.4668903 | 1.4104178 |
| sp P49189 AL9A1_HUMAN   | -0.4666634 | 5.7898192 |
| sp Q99536 VAT1_HUMAN    | -0.4661388 | 3.673847  |
| sp Q86UP2-4 KTN1_HUMAN  | -0.4656448 | 6.8152957 |
| sp Q02318 CP27A_HUMAN   | -0.4650135 | 1.6960104 |
| sp Q15365 PCBP1_HUMAN   | -0.4642601 | 2.5644996 |
| sp Q16555 DPYL2_HUMAN   | -0.4635811 | 6.7267804 |
| sp P42330 AK1C3_HUMAN   | -0.4590426 | 3.5908275 |
| sp O15144 ARPC2_HUMAN   | -0.4574947 | 3.1266599 |
| sp P11021 BIP_HUMAN     | -0.4553223 | 14.632371 |
| sp P46926 GNPI1_HUMAN   | -0.4545097 | 2.1818786 |
| sp O75348 VATG1_HUMAN   | -0.4541798 | 1.6960104 |
| sp P04083 ANXA1_HUMAN   | -0.4535236 | 5.6658998 |
| sp P51178-2 PLCD1_HUMAN | -0.4530525 | 1.6960104 |
| sp Q9ULA0 DNPEP_HUMAN   | -0.4527874 | 3.186611  |
| sp Q13045-2 FLII_HUMAN  | -0.4526844 | 1.560883  |
| sp P29350-3 PTN6_HUMAN  | -0.4514008 | 1.6997428 |

|                         |            |           |
|-------------------------|------------|-----------|
| sp P19367-2 HXK1_HUMAN  | -0.4511433 | 6.57691   |
| sp P52565 GDIR1_HUMAN   | -0.4492722 | 3.5908275 |
| sp Q1KMD3 HNRL2_HUMAN   | -0.4492683 | 3.2079036 |
| sp Q86VB7-2 C163A_HUMAN | -0.446106  | 8.365451  |
| sp P50995-2 ANX11_HUMAN | -0.4459572 | 4.3100786 |
| sp P00390-2 GSHR_HUMAN  | -0.4456177 | 1.6295799 |
| sp P30626-2 SORCN_HUMAN | -0.4438801 | 3.2221727 |
| sp P60953 CDC42_HUMAN   | -0.4438591 | 2.8384566 |
| sp P05783 K1C18_HUMAN   | -0.4435062 | 6.1187267 |
| sp P62937 PIIA_HUMAN    | -0.4434586 | 1.4104178 |
| sp P51148-2 RAB5C_HUMAN | -0.4420471 | 1.6960104 |
| sp Q9BS26 ERP44_HUMAN   | -0.4404831 | 3.316884  |
| sp Q13451 FKBP5_HUMAN   | -0.4397945 | 2.4829872 |
| sp P36578 RL4_HUMAN     | -0.4389172 | 1.4351699 |
| sp P55072 TERA_HUMAN    | -0.4374828 | 11.713043 |
| sp P10809 CH60_HUMAN    | -0.4370518 | 4.293713  |
| sp P35270 SPRE_HUMAN    | -0.4370251 | 2.6576471 |
| sp O43813 LANC1_HUMAN   | -0.436573  | 1.6960104 |
| sp P27361 MKO3_HUMAN    | -0.4363861 | 1.6960104 |
| sp Q13425 SNTB2_HUMAN   | -0.4361458 | 1.6604291 |
| sp Q04760-2 LGUL_HUMAN  | -0.4332829 | 1.8604537 |
| sp P02545 LMNA_HUMAN    | -0.4332066 | 14.65356  |
| sp P22695 QCR2_HUMAN    | -0.4310684 | 1.3635377 |
| sp Q96KP4 CNDP2_HUMAN   | -0.4297581 | 5.6946616 |
| sp O43837 IDH3B_HUMAN   | -0.4284248 | 1.6960104 |
| sp P07737 PROF1_HUMAN   | -0.4280109 | 4.0829325 |
| sp Q969V3-2 NCLN_HUMAN  | -0.4268055 | 1.4104178 |
| sp Q06323 PSME1_HUMAN   | -0.4245758 | 3.6746628 |
| sp Q14019 COTL1_HUMAN   | -0.4243412 | 1.4278674 |
| sp Q7Z406 MYH14_HUMAN   | -0.4232445 | 8.059228  |
| sp Q92817 EVPL_HUMAN    | -0.4219933 | 2.193074  |
| sp P11766 ADHX_HUMAN    | -0.4219894 | 2.816493  |
| sp O15247 CLIC2_HUMAN   | -0.4197388 | 2.058973  |
| sp Q13217 DNJC3_HUMAN   | -0.4184036 | 2.1818786 |
| sp P06733 ENOA_HUMAN    | -0.4176159 | 7.501921  |
| sp P61978-3 HNRPK_HUMAN | -0.4173851 | 4.5301065 |
| sp P61981 1433G_HUMAN   | -0.4158897 | 2.365629  |
| sp Q9UBV8 PEF1_HUMAN    | -0.4156094 | 1.6960104 |
| sp P59998 ARPC4_HUMAN   | -0.4150505 | 2.6576471 |
| sp P07858 CATB_HUMAN    | -0.4135132 | 2.6182911 |
| sp Q9UHB6-4 LIMA1_HUMAN | -0.4127331 | 1.9647322 |
| sp Q16543 CDC37_HUMAN   | -0.4126091 | 4.964395  |
| sp Q96I99 SUCB2_HUMAN   | -0.4125748 | 2.923088  |
| sp P10301 RRAS_HUMAN    | -0.4124832 | 1.6960104 |
| sp Q9UL46 PSME2_HUMAN   | -0.4124184 | 2.2323174 |

|                         |            |           |
|-------------------------|------------|-----------|
| sp Q16531 DDB1_HUMAN    | -0.41008   | 5.172756  |
| sp P20645 MPRD_HUMAN    | -0.4096928 | 1.6960104 |
| sp Q6P2Q9 PRP8_HUMAN    | -0.4095688 | 1.4104178 |
| sp P07900-2 HS90A_HUMAN | -0.4081593 | 4.7504272 |
| sp Q969X5-2 ERGI1_HUMAN | -0.4049473 | 1.6960104 |
| sp P11940-2 PABP1_HUMAN | -0.4043274 | 1.4104178 |
| sp P55084 ECHB_HUMAN    | -0.4039383 | 3.0019732 |
| sp O75369-2 FLNB_HUMAN  | -0.4023171 | 12.388624 |
| sp Q9P0V9-2 SEP10_HUMAN | -0.4016094 | 1.6997428 |
| sp Q9Y5S9-2 RBM8A_HUMAN | -0.4007778 | 1.6960104 |
| sp P35232 PHB_HUMAN     | -0.3969307 | 2.8132849 |
| sp Q13347 EIF3I_HUMAN   | -0.3962879 | 1.8444856 |
| sp O95782-2 AP2A1_HUMAN | -0.3956871 | 1.4278674 |
| sp Q9HDC9 APMAP_HUMAN   | -0.3948517 | 3.545398  |
| sp Q6UWY5 OLFL1_HUMAN   | -0.3925304 | 4.509013  |
| sp P54886-2 P5CS_HUMAN  | -0.3915386 | 1.4104178 |
| sp P24539 AT5F1_HUMAN   | -0.3915234 | 1.8595492 |
| sp P09497-2 CLCB_HUMAN  | -0.390974  | 2.1818786 |
| sp P50453 SPB9_HUMAN    | -0.3902874 | 3.342776  |
| sp P07686 HEXB_HUMAN    | -0.3866615 | 2.058973  |
| sp O75643 U520_HUMAN    | -0.3858051 | 1.6960104 |
| sp Q8WXF1 PSPC1_HUMAN   | -0.3854828 | 2.6576471 |
| sp Q9H4M9 EHD1_HUMAN    | -0.3849335 | 2.151766  |
| sp P13797 PLST_HUMAN    | -0.3840046 | 4.0754967 |
| sp Q14764 MVP_HUMAN     | -0.3835526 | 8.221417  |
| sp P28065-2 PSB9_HUMAN  | -0.3822155 | 1.560883  |
| sp O75947-2 ATP5H_HUMAN | -0.3809471 | 2.9807727 |
| sp Q9BVC6 TM109_HUMAN   | -0.3795624 | 1.6960104 |
| sp Q12905 ILF2_HUMAN    | -0.3793354 | 2.923088  |
| sp P29218 IMPA1_HUMAN   | -0.3792114 | 2.1404836 |
| sp O43491 E41L2_HUMAN   | -0.3771629 | 2.0598862 |
| sp P13489 RINI_HUMAN    | -0.3770618 | 6.988256  |
| sp Q9HBL0 TENS1_HUMAN   | -0.3758335 | 4.5635147 |
| sp P05198 IF2A_HUMAN    | -0.3755322 | 2.1818786 |
| sp P23396 RS3_HUMAN     | -0.3751755 | 5.074809  |
| sp Q03252 LMNB2_HUMAN   | -0.3740273 | 8.540238  |
| sp P52566 GDIR2_HUMAN   | -0.3731937 | 3.1266599 |
| sp O00231-2 PSD11_HUMAN | -0.3710213 | 2.1818786 |
| sp P04066 FUOCO_HUMAN   | -0.3679886 | 1.6960104 |
| sp P05455 LA_HUMAN      | -0.3674183 | 2.7472508 |
| sp P62993 GRB2_HUMAN    | -0.3673306 | 2.6997027 |
| sp P11047 LAMC1_HUMAN   | -0.3666782 | 5.2853217 |
| sp O75083 WDR1_HUMAN    | -0.3666229 | 7.0304866 |
| sp P30086 PEBP1_HUMAN   | -0.3639565 | 2.3143692 |
| sp P25705 ATPA_HUMAN    | -0.3628597 | 1.4716977 |



|                          |            |           |
|--------------------------|------------|-----------|
| sp Q13557-12 KCC2D_HUMAN | -0.3627501 | 2.9807727 |
| sp Q15393 SF3B3_HUMAN    | -0.3622494 | 2.6997027 |
| sp P49411 EFTU_HUMAN     | -0.3618336 | 3.1015959 |
| sp P13639 EF2_HUMAN      | -0.3603897 | 7.2852974 |
| sp P20340-2 RAB6A_HUMAN  | -0.3603478 | 3.8337784 |
| sp P23634-8 AT2B4_HUMAN  | -0.3595429 | 1.8595492 |
| sp P55268 LAMB2_HUMAN    | -0.3582039 | 5.589603  |
| sp O95865 DDAH2_HUMAN    | -0.3560753 | 3.0019732 |
| sp P05787-2 K2C8_HUMAN   | -0.3543663 | 10.393089 |
| sp Q16853 AOC3_HUMAN     | -0.3543568 | 3.1184776 |
| sp Q14240-2 IF4A2_HUMAN  | -0.353981  | 1.3815327 |
| sp O00764-2 PDXK_HUMAN   | -0.3535595 | 2.058973  |
| sp P21964-2 COMT_HUMAN   | -0.351162  | 1.8595492 |
| sp P25398 RS12_HUMAN     | -0.3510933 | 1.9951487 |
| sp P20618 PSB1_HUMAN     | -0.3504181 | 3.5908275 |
| sp Q12931-2 TRAP1_HUMAN  | -0.3503723 | 1.4104178 |
| sp P61019 RAB2A_HUMAN    | -0.3489437 | 1.6405568 |
| sp P11142 HSP7C_HUMAN    | -0.3476219 | 4.399835  |
| sp Q08211 DHX9_HUMAN     | -0.3466606 | 4.0051374 |
| sp Q96AE4-2 FUBP1_HUMAN  | -0.3462486 | 1.4564189 |
| sp Q14344 GNA13_HUMAN    | -0.3460884 | 1.6604291 |
| sp Q9Y277-2 VDAC3_HUMAN  | -0.3458786 | 3.2221727 |
| sp Q14258 TRI25_HUMAN    | -0.3447647 | 2.0727112 |
| sp P62753 RS6_HUMAN      | -0.3447189 | 1.6960104 |
| sp Q9Y2X3 NOP58_HUMAN    | -0.3402672 | 1.4278674 |
| sp O75367-2 H2AY_HUMAN   | -0.3401909 | 2.4829872 |
| sp Q9BXP5-2 SRRT_HUMAN   | -0.3401527 | 1.7590232 |
| sp P00966 ASSY_HUMAN     | -0.3384075 | 2.058973  |
| sp P50552 VASP_HUMAN     | -0.3379908 | 2.5644996 |
| sp P28838-2 AMPL_HUMAN   | -0.3363075 | 7.016219  |
| sp P06576 ATPB_HUMAN     | -0.3360806 | 5.4506283 |
| sp Q9NZ01 TECR_HUMAN     | -0.3348885 | 1.6604291 |
| sp O15127 SCAM2_HUMAN    | -0.334795  | 1.6960104 |
| sp P30050 RL12_HUMAN     | -0.3322735 | 2.1818786 |
| sp P46976-2 GLYG_HUMAN   | -0.3315811 | 2.6576471 |
| sp P13010 XRCC5_HUMAN    | -0.3313904 | 2.0308967 |
| sp P31930 QCR1_HUMAN     | -0.328598  | 2.894491  |
| sp Q99623 PHB2_HUMAN     | -0.3237114 | 1.3274423 |
| sp Q9UPN3 MACF1_HUMAN    | -0.3236942 | 2.4140475 |
| sp Q9P258 RCC2_HUMAN     | -0.3234501 | 1.5646582 |
| sp Q15717-2 ELAV1_HUMAN  | -0.3229313 | 1.4104178 |
| sp Q9Y3Z3 SAMH1_HUMAN    | -0.3221989 | 2.5080707 |
| sp P38919 IF4A3_HUMAN    | -0.3218308 | 2.441399  |
| sp P28070 PSB4_HUMAN     | -0.3215408 | 1.4050349 |
| sp P40227 TCPZ_HUMAN     | -0.3204117 | 4.7039127 |

|                         |            |           |
|-------------------------|------------|-----------|
| sp P68104 EF1A1_HUMAN   | -0.320406  | 2.044628  |
| sp Q10713 MPPA_HUMAN    | -0.3203297 | 1.560883  |
| sp P63244 RACK1_HUMAN   | -0.317709  | 4.276259  |
| sp O14950 ML12B_HUMAN   | -0.3169212 | 2.1818786 |
| sp Q16181-2 SEPT7_HUMAN | -0.3166962 | 4.080888  |
| sp O43390-2 HNRPR_HUMAN | -0.3157082 | 1.792336  |
| sp Q8WUM4 PDC6I_HUMAN   | -0.3155422 | 2.3285198 |
| sp Q13418 ILK_HUMAN     | -0.3142109 | 1.7703108 |
| sp Q8IZ83-3 A16A1_HUMAN | -0.3106709 | 1.9948454 |
| sp Q9BXS5-2 AP1M1_HUMAN | -0.3095512 | 2.1818786 |
| sp P62820 RAB1A_HUMAN   | -0.3072739 | 2.1818786 |
| sp P08648 ITA5_HUMAN    | -0.3064976 | 1.6960104 |
| sp O75131 CPNE3_HUMAN   | -0.3044395 | 2.816493  |
| sp P60174 TPIS_HUMAN    | -0.3029728 | 5.362944  |
| sp P18124 RL7_HUMAN     | -0.3021374 | 1.4278674 |
| sp Q9Y3I0 RTCB_HUMAN    | -0.3020706 | 2.3388627 |
| sp P52597 HNRPF_HUMAN   | -0.3012524 | 1.5054473 |
| sp P16152 CBR1_HUMAN    | -0.3008747 | 1.6853416 |
| sp Q92945 FUBP2_HUMAN   | -0.3008347 | 2.4402673 |
| sp Q01130-2 SRSF2_HUMAN | -0.2987366 | 1.4104178 |
| sp P07942 LAMB1_HUMAN   | -0.2978287 | 2.5529532 |
| sp P12956 XRCC6_HUMAN   | -0.2955608 | 3.8047774 |
| sp P53004 BIEA_HUMAN    | -0.2952805 | 1.8444856 |
| sp P49354-2 FNNTA_HUMAN | -0.2929668 | 1.3815327 |
| sp Q16881-2 TRXR1_HUMAN | -0.2910862 | 1.8077462 |
| sp P32969 RL9_HUMAN     | -0.290823  | 1.6960104 |
| sp O95831-3 AIFM1_HUMAN | -0.2906818 | 3.416951  |
| sp Q12907 LMAN2_HUMAN   | -0.2898102 | 1.4050349 |
| sp P46939-2 UTRO_HUMAN  | -0.2897978 | 2.7574906 |
| sp P47897 SYQ_HUMAN     | -0.2888031 | 1.4278674 |
| sp P47756-2 CAPZB_HUMAN | -0.2884712 | 3.481736  |
| sp Q9NPH2 INO1_HUMAN    | -0.2878609 | 1.7165122 |
| sp Q99832 TCPH_HUMAN    | -0.2873612 | 2.2270947 |
| sp Q9BSJ8-2 ESYT1_HUMAN | -0.2861328 | 5.222092  |
| sp Q99798 ACON_HUMAN    | -0.2848282 | 3.535148  |
| sp Q99426 TBCB_HUMAN    | -0.2843628 | 1.4104178 |
| sp P14780 MMP9_HUMAN    | -0.2841682 | 1.827201  |
| sp P21953 ODBB_HUMAN    | -0.2838898 | 1.6960104 |
| sp Q15084-2 PDIA6_HUMAN | -0.2802982 | 3.0253785 |
| sp Q9H4A4 AMPB_HUMAN    | -0.2796021 | 1.6277974 |
| sp Q9Y383-3 LC7L2_HUMAN | -0.279562  | 1.4104178 |
| sp Q16891-2 MIC60_HUMAN | -0.2792625 | 1.3481187 |
| sp P49368 TCPG_HUMAN    | -0.2792206 | 3.2295208 |
| sp Q92973-2 TNPO1_HUMAN | -0.2788982 | 1.5646582 |
| sp P48637 GSHB_HUMAN    | -0.2765369 | 2.0598862 |

|                         |            |           |
|-------------------------|------------|-----------|
| sp P27797 CALR_HUMAN    | -0.2748489 | 4.890839  |
| sp Q96DG6 CMBL_HUMAN    | -0.2743301 | 1.6960104 |
| sp P27348 1433T_HUMAN   | -0.273056  | 1.6046445 |
| sp P04843 RPN1_HUMAN    | -0.2724476 | 3.6971807 |
| sp P06737-2 PYGL_HUMAN  | -0.2711582 | 3.5053878 |
| sp P30153 2AAA_HUMAN    | -0.2699814 | 3.8683267 |
| sp Q13308-6 PTK7_HUMAN  | -0.2668228 | 2.1818786 |
| sp Q86UX7-2 URP2_HUMAN  | -0.2661057 | 1.5071542 |
| sp P53621-2 COPA_HUMAN  | -0.26577   | 1.9108402 |
| sp P46777 RL5_HUMAN     | -0.2647247 | 2.1377194 |
| sp Q99733-2 NP1L4_HUMAN | -0.2640533 | 1.4278674 |
| sp Q9NZM1-6 MYOF_HUMAN  | -0.2633896 | 2.368217  |
| sp Q9Y490 TLN1_HUMAN    | -0.2632656 | 13.875408 |
| sp P16219 ACADS_HUMAN   | -0.2606106 | 1.6997428 |
| sp P07195 LDHB_HUMAN    | -0.2602367 | 3.656485  |
| sp P35914 HMGCL_HUMAN   | -0.2598    | 2.3143692 |
| sp P35606 COPB2_HUMAN   | -0.2580338 | 4.857963  |
| sp Q96QK1 VPS35_HUMAN   | -0.2568321 | 1.7754551 |
| sp P26641 EF1G_HUMAN    | -0.2528667 | 2.8438601 |
| sp O60749 SNX2_HUMAN    | -0.2516975 | 3.8106754 |
| sp P11216 PYGB_HUMAN    | -0.2508202 | 2.1795774 |
| sp Q96AG4 LRC59_HUMAN   | -0.2504673 | 1.560883  |
| sp P49419-2 AL7A1_HUMAN | -0.2497311 | 2.4402673 |
| sp P27338 AOFB_HUMAN    | -0.2496777 | 2.2752137 |
| sp P08758 ANXA5_HUMAN   | -0.2478371 | 3.1785138 |
| sp P35998 PRS7_HUMAN    | -0.2461147 | 1.9627187 |
| sp O15031 PLXB2_HUMAN   | -0.2440262 | 1.5555226 |
| sp P46782 RS5_HUMAN     | -0.2438355 | 2.6576471 |
| sp O75955 FLOT1_HUMAN   | -0.2429009 | 3.0139608 |
| sp P14625 ENPL_HUMAN    | -0.2425041 | 7.3195586 |
| sp P25789 PSA4_HUMAN    | -0.23983   | 1.9948454 |
| sp P50570-2 DYN2_HUMAN  | -0.2393894 | 2.058973  |
| sp P43121 MUC18_HUMAN   | -0.2370834 | 2.56956   |
| sp P11215-2 ITAM_HUMAN  | -0.236721  | 1.9951487 |
| sp P36543-2 VATE1_HUMAN | -0.2360687 | 1.4104178 |
| sp Q15005 SPCS2_HUMAN   | -0.2357426 | 1.4104178 |
| sp P50990 TCPQ_HUMAN    | -0.2351799 | 4.6997666 |
| sp Q9H2D6-2 TARA_HUMAN  | -0.233633  | 1.4351699 |
| sp P48444 COPD_HUMAN    | -0.230402  | 3.3101625 |
| sp P31150 GDIA_HUMAN    | -0.2277927 | 2.5385003 |
| sp P00558 PGK1_HUMAN    | -0.2273941 | 1.3400655 |
| sp O14974-3 MYPT1_HUMAN | -0.2272062 | 1.7713763 |
| sp O43242 PSMD3_HUMAN   | -0.2263088 | 2.2323174 |
| sp P60842 IF4A1_HUMAN   | -0.2251625 | 2.400925  |
| sp Q16851 UGPA_HUMAN    | -0.2233162 | 2.096182  |

|                         |            |           |
|-------------------------|------------|-----------|
| sp P62241 RS8_HUMAN     | -0.2231712 | 3.1266599 |
| sp P98160 PGBM_HUMAN    | -0.219904  | 3.1189184 |
| sp P50502 F10A1_HUMAN   | -0.2190781 | 1.3635377 |
| sp P39060-1 COIA1_HUMAN | -0.2190723 | 1.4278674 |
| sp O14818 PSA7_HUMAN    | -0.2183762 | 2.6479273 |
| sp Q13409-3 DC112_HUMAN | -0.2165384 | 1.3080103 |
| sp P21980 TGM2_HUMAN    | -0.2164497 | 2.795657  |
| sp Q99714 HCD2_HUMAN    | -0.2143402 | 1.7703108 |
| sp Q12906-4 ILF3_HUMAN  | -0.2131424 | 2.5322723 |
| sp P30101 PDIA3_HUMAN   | -0.2131138 | 5.501058  |
| sp Q14203-3 DCTN1_HUMAN | -0.2108707 | 1.4050349 |
| sp P13667 PDIA4_HUMAN   | -0.2100906 | 5.101818  |
| sp P21281 VATB2_HUMAN   | -0.2098084 | 3.417183  |
| sp P46063 RECQ1_HUMAN   | -0.2095966 | 1.8444856 |
| sp P00403 COX2_HUMAN    | -0.2095432 | 1.3815327 |
| sp P14314-2 GLU2B_HUMAN | -0.2050037 | 1.5983955 |
| sp Q14974 IMB1_HUMAN    | -0.2037125 | 2.2270947 |
| sp Q9NZ08-2 ERAP1_HUMAN | -0.2034874 | 1.6853416 |
| sp Q63ZY3-3 KANK2_HUMAN | -0.200695  | 1.4278674 |
| sp P04075 ALDOA_HUMAN   | -0.2002525 | 5.0293546 |
| sp P07384 CAN1_HUMAN    | -0.2002029 | 1.7936871 |
| sp P28062 PSB8_HUMAN    | -0.199234  | 1.3815327 |
| sp Q8N1G4 LRC47_HUMAN   | -0.1984882 | 2.5461748 |
| sp Q13185 CBX3_HUMAN    | -0.1979637 | 1.9647322 |
| sp P30085 KCY_HUMAN     | -0.1943026 | 1.4104178 |
| sp P06744 G6PI_HUMAN    | -0.190279  | 3.2259803 |
| sp P39023 RL3_HUMAN     | -0.1884728 | 1.5646582 |
| sp Q00610-2 CLH1_HUMAN  | -0.1865215 | 3.2772517 |
| sp Q99497 PARK7_HUMAN   | -0.183054  | 1.6997428 |
| sp Q969G5 CAVN3_HUMAN   | -0.1830483 | 1.4104178 |
| sp P23526 SAHH_HUMAN    | -0.1823654 | 2.8274305 |
| sp Q13126-2 MTAP_HUMAN  | -0.1811123 | 1.4050349 |
| sp P16615 AT2A2_HUMAN   | -0.1754093 | 1.7662107 |
| sp Q07954 LRP1_HUMAN    | -0.1724243 | 1.596566  |
| sp P60983 GMFB_HUMAN    | -0.1720944 | 1.6960104 |
| sp P07237 PDIA1_HUMAN   | -0.1704178 | 7.046882  |
| sp P08133 ANXA6_HUMAN   | -0.1658516 | 3.7303731 |
| sp Q9UBE0 SAE1_HUMAN    | -0.1647902 | 1.4104178 |
| sp Q9NYU2-2 UGGG1_HUMAN | -0.164114  | 2.9343572 |
| sp P62888 RL30_HUMAN    | -0.1600609 | 1.6960104 |
| sp P49913 CAMP_HUMAN    | -0.1599579 | 1.4104178 |
| sp P17987 TCPA_HUMAN    | -0.1546192 | 1.3431479 |
| sp P50991-2 TCPD_HUMAN  | -0.1540117 | 1.7565529 |
| sp Q15029-2 U5S1_HUMAN  | -0.1538458 | 1.7026864 |
| sp Q15019-2 SEPT2_HUMAN | -0.1481476 | 2.8046327 |

|                         |            |           |
|-------------------------|------------|-----------|
| sp O15145 ARPC3_HUMAN   | -0.1449223 | 1.6960104 |
| sp Q16658 FSCN1_HUMAN   | -0.1369305 | 1.3908802 |
| sp P21333-2 FLNA_HUMAN  | -0.1366901 | 8.863618  |
| sp P47755 CAZA2_HUMAN   | -0.1353779 | 1.9153107 |
| sp P55786 PSA_HUMAN     | -0.1335259 | 1.8521893 |
| sp P23284 PPIB_HUMAN    | -0.1321716 | 1.8060131 |
| sp P35579 MYH9_HUMAN    | -0.1320419 | 3.2562804 |
| sp P52907 CAZA1_HUMAN   | -0.1237755 | 1.515701  |
| sp P19971 TYPH_HUMAN    | -0.0998402 | 1.8786486 |
| sp P60660-2 MYL6_HUMAN  | -0.0793419 | 1.4017582 |
| sp Q9NRN5-2 OLFL3_HUMAN | 0.08413506 | 1.4351699 |
| sp Q15582 BGH3_HUMAN    | 0.09831047 | 1.500785  |
| sp P13647 K2C5_HUMAN    | 0.09856606 | 1.647208  |
| sp P22105-1 TENX_HUMAN  | 0.14392853 | 4.9096303 |
| sp Q9Y6C2 EMIL1_HUMAN   | 0.1618805  | 2.1546397 |
| sp Q0ZGT2-4 NEXN_HUMAN  | 0.16736221 | 1.3481187 |
| sp Q13162 PRDX4_HUMAN   | 0.16912079 | 2.3047035 |
| sp O00754-2 MA2B1_HUMAN | 0.17090034 | 1.9647322 |
| sp P35555 FBN1_HUMAN    | 0.18336678 | 4.9985876 |
| sp P08670 VIME_HUMAN    | 0.18417549 | 11.33357  |
| sp P24821-4 TENA_HUMAN  | 0.19094086 | 2.2535503 |
| sp Q92896-2 GSLG1_HUMAN | 0.1916275  | 1.8444856 |
| sp Q07507 DERM_HUMAN    | 0.19601822 | 2.7624686 |
| sp P21266 GSTM3_HUMAN   | 0.19797134 | 2.044628  |
| sp P30041 PRDX6_HUMAN   | 0.20548439 | 3.1280005 |
| sp P30711 GSTT1_HUMAN   | 0.20690632 | 1.6960104 |
| sp P00491 PNPH_HUMAN    | 0.22642899 | 2.923088  |
| sp Q8TDL5 BPIB1_HUMAN   | 0.23704529 | 1.515701  |
| sp Q9NR12-2 PDLI7_HUMAN | 0.24579048 | 1.827201  |
| sp P28331-2 NDUS1_HUMAN | 0.26221657 | 2.3143692 |
| sp P11498 PYC_HUMAN     | 0.26953697 | 1.6960104 |
| sp Q8N2S1 LTBP4_HUMAN   | 0.2717495  | 3.5053878 |
| sp Q14195-2 DPYL3_HUMAN | 0.27277374 | 4.01034   |
| sp P00488 F13A_HUMAN    | 0.2812786  | 2.4970746 |
| sp P36269-3 GGT5_HUMAN  | 0.28225994 | 2.5644996 |
| sp P22352 GPX3_HUMAN    | 0.28427696 | 1.6960104 |
| sp P08294 SODE_HUMAN    | 0.28476334 | 1.3080103 |
| sp P06132 DCUP_HUMAN    | 0.29065323 | 1.5646582 |
| sp Q8NBS9 TXND5_HUMAN   | 0.29108047 | 5.450629  |
| sp P51911 CNN1_HUMAN    | 0.32061005 | 3.9403465 |
| sp Q9UMS6-2 SYNP2_HUMAN | 0.32098007 | 2.7472508 |
| sp Q5TDH0-3 DDI2_HUMAN  | 0.33494186 | 1.4104178 |
| sp Q07065 CKAP4_HUMAN   | 0.3459549  | 9.607684  |
| sp P67936-2 TPM4_HUMAN  | 0.3604641  | 1.6960104 |
| sp P04264 K2C1_HUMAN    | 0.36687088 | 10.259592 |

|                         |            |            |
|-------------------------|------------|------------|
| sp Q53GG5-2 PDLI3_HUMAN | 0.38015175 | 1.3815327  |
| sp Q9UBX5 FBLN5_HUMAN   | 0.38614464 | 2.12598    |
| sp P01011 AACT_HUMAN    | 0.40455627 | 7.086946   |
| sp P23219-2 PGH1_HUMAN  | 0.40616035 | 2.1818786  |
| sp Q15102 PA1B3_HUMAN   | 0.41086197 | 1.4104178  |
| sp O60831 PRAF2_HUMAN   | 0.41267014 | 1.6960104  |
| sp Q8WU39 MZB1_HUMAN    | 0.41846085 | 2.5644996  |
| sp P35527 K1C9_HUMAN    | 0.42078972 | 4.881816   |
| sp P02765 FETUA_HUMAN   | 0.4324665  | 2.0727112  |
| sp P04259 K2C6B_HUMAN   | 0.43745995 | 1.9647322  |
| sp Q9Y315 DEOC_HUMAN    | 0.44018555 | 1.9647322  |
| sp P07951 TPM2_HUMAN    | 0.45230103 | 1.827201   |
| sp P00748 FA12_HUMAN    | 0.45306587 | 1.6960104  |
| sp P98095-2 FBLN2_HUMAN | 0.45435333 | 4.0218377  |
| sp P23946 CMA1_HUMAN    | 0.45511246 | 2.3143692  |
| sp A1L4H1 SRCRL_HUMAN   | 0.4587736  | 1.6960104  |
| sp P00736 C1R_HUMAN     | 0.48395824 | 1.6960104  |
| sp P13611 CSPG2_HUMAN   | 0.48461914 | 5.417897   |
| sp P24844 MYL9_HUMAN    | 0.4852867  | 1.6960104  |
| sp Q00796 DHSO_HUMAN    | 0.4931755  | 1.6960104  |
| sp P11171-7 41_HUMAN    | 0.5433693  | 2.1818786  |
| sp Q14192 FHL2_HUMAN    | 0.55152893 | 2.1818786  |
| sp P13716-2 HEM2_HUMAN  | 0.5685692  | 3.5908275  |
| sp P02792 FRIL_HUMAN    | 0.57741165 | 3.3668416  |
| sp Q16647 PTGIS_HUMAN   | 0.5784168  | 2.6576471  |
| sp P50454 SERPH_HUMAN   | 0.588562   | 3.8337784  |
| sp P09493-8 TPM1_HUMAN  | 0.5894642  | 3.5908275  |
| sp Q8TAQ2-2 SMRC2_HUMAN | 0.6193638  | 1.6960104  |
| sp Q01995 TAGL_HUMAN    | 0.62096786 | 7.8905663  |
| sp P04196 HRG_HUMAN     | 0.62278175 | 3.9658737  |
| sp P23142 FBLN1_HUMAN   | 0.6278534  | 3.1266599  |
| sp P51888 PRELP_HUMAN   | 0.6377964  | 5.869831   |
| sp P01009 A1AT_HUMAN    | 0.6476307  | 9.893875   |
| sp Q12805-2 FBLN3_HUMAN | 0.65185165 | 5.727641   |
| sp P05156 CFAI_HUMAN    | 0.65800095 | 3.1208909  |
| sp P02753 RET4_HUMAN    | 0.67069435 | 1.6960104  |
| sp P09493-9 TPM1_HUMAN  | 0.6779232  | 1.6960104  |
| sp P04004 VTNC_HUMAN    | 0.67943764 | 4.051346   |
| sp P01019 ANGT_HUMAN    | 0.687973   | 1.3815327  |
| sp P02743 SAMP_HUMAN    | 0.7080326  | 4.509013   |
| sp P07357 CO8A_HUMAN    | 0.7080765  | 2.6576471  |
| sp P02649 APOE_HUMAN    | 0.7267418  | 4.578167   |
| sp P03952 KLKB1_HUMAN   | 0.7280731  | 2.1818786  |
| sp O14558 HSPB6_HUMAN   | 0.7299051  | 1.8444856  |
| sp P17661 DESM_HUMAN    | 0.78365135 | 14.4774685 |

|                         |            |           |
|-------------------------|------------|-----------|
| sp P00450 CERU_HUMAN    | 0.7925682  | 10.210825 |
| sp P16157-21 ANK1_HUMAN | 0.79299164 | 4.051346  |
| sp Q9NYL4 FKB11_HUMAN   | 0.79729843 | 1.6960104 |
| sp P06681-3 CO2_HUMAN   | 0.7995491  | 2.6576471 |
| sp Q96PD5-2 PGRP2_HUMAN | 0.8237438  | 1.7590232 |
| sp P04217 A1BG_HUMAN    | 0.8264046  | 4.964395  |
| sp P30043 BLVRB_HUMAN   | 0.83176804 | 2.1818786 |
| sp P07585 PGS2_HUMAN    | 0.8396492  | 5.417897  |
| sp P02452 CO1A1_HUMAN   | 0.87186813 | 2.058973  |
| sp Q96D15 RCN3_HUMAN    | 0.87590694 | 1.6960104 |
| sp P23456 Trypsin       | 0.88295174 | 3.5908275 |
| sp P02766 TTHY_HUMAN    | 0.88648224 | 2.1818786 |
| sp P19827 ITIH1_HUMAN   | 0.88695717 | 4.405163  |
| sp P00734 THR_B_HUMAN   | 0.8885002  | 5.523198  |
| sp P11277-2 SPTB1_HUMAN | 0.9027176  | 6.3204336 |
| sp P08123 CO1A2_HUMAN   | 0.91880894 | 2.6576471 |
| sp P07996 TSP1_HUMAN    | 0.9202385  | 1.6960104 |
| sp P10643 CO7_HUMAN     | 0.9302101  | 4.3100786 |
| sp P13671 CO6_HUMAN     | 0.93118286 | 1.6960104 |
| sp P02790 HEMO_HUMAN    | 0.9642296  | 7.831889  |
| sp P43652 AFAM_HUMAN    | 0.9649868  | 4.509013  |
| sp P20774 MIME_HUMAN    | 0.976387   | 4.051346  |
| sp P02748 CO9_HUMAN     | 0.98711014 | 7.2183566 |
| sp P00751 CFAB_HUMAN    | 0.9912491  | 10.583587 |
| sp P07738 PMGE_HUMAN    | 0.99913025 | 2.1818786 |
| sp P02774-3 VTDB_HUMAN  | 1.0003338  | 9.004438  |
| sp P51884 LUM_HUMAN     | 1.003931   | 8.112776  |
| sp P25311 ZA2G_HUMAN    | 1.008606   | 4.051346  |
| sp P02549-2 SPTA1_HUMAN | 1.0203056  | 8.471928  |
| sp P02760 AMBP_HUMAN    | 1.0324078  | 3.5908275 |
| sp P04003 C4BPA_HUMAN   | 1.077776   | 5.869831  |
| sp P07451 CAH3_HUMAN    | 1.0798988  | 2.058973  |
| sp P01008 ANT3_HUMAN    | 1.094841   | 8.112776  |
| sp P36955 PEDF_HUMAN    | 1.1082611  | 4.051346  |
| sp P02730 B3AT_HUMAN    | 1.1383438  | 6.521583  |
| sp P0DOX7 IGK_HUMAN     | 1.1580391  | 2.1818786 |
| sp Q9BXN1 ASPN_HUMAN    | 1.1677647  | 2.6576471 |
| sp P01042-2 KNG1_HUMAN  | 1.196188   | 7.2183566 |
| sp P27169 PON1_HUMAN    | 1.205225   | 1.6960104 |
| sp P29622 KAIN_HUMAN    | 1.2494411  | 2.6576471 |
| sp P08603 CFAH_HUMAN    | 1.2791233  | 14.875408 |
| sp P01859 IGHG2_HUMAN   | 1.2951946  | 4.509013  |
| sp P02749 APOH_HUMAN    | 1.3094406  | 3.5908275 |
| sp P04114 APOB_HUMAN    | 1.3231277  | 14.238586 |
| sp P01031 CO5_HUMAN     | 1.3237534  | 7.3945704 |

|                         |            |            |
|-------------------------|------------|------------|
| sp P01023 A2MG_HUMAN    | 1.3319321  | 15.95459   |
| sp P32119 PRDX2_HUMAN   | 1.3356304  | 6.7698927  |
| sp P19823 ITIH2_HUMAN   | 1.3398952  | 5.417897   |
| sp P00918 CAH2_HUMAN    | 1.3896675  | 4.509013   |
| sp P10909-5 CLUS_HUMAN  | 1.3995953  | 4.964395   |
| sp P0DOX2 IGA2_HUMAN    | 1.4191971  | 1.6960104  |
| sp P05546 HEP2_HUMAN    | 1.4532719  | 2.6576471  |
| sp P15088 CBPA3_HUMAN   | 1.5031815  | 2.1818786  |
| sp P06727 APOA4_HUMAN   | 1.5233841  | 5.98738    |
| sp P00915 CAH1_HUMAN    | 1.6297035  | 7.665951   |
| sp P0DOX8 IGL1_HUMAN    | 1.655674   | 2.1818786  |
| sp P02042 HBD_HUMAN     | 1.6788445  | 4.051346   |
| sp P0DOY3 IGLC3_HUMAN   | 1.6990528  | 2.1818786  |
| sp P0DOX5 IGG1_HUMAN    | 1.7674084  | 4.964395   |
| sp P02652-2 APOA2_HUMAN | 1.7806282  | 3.1266599  |
| sp P01876 IGHA1_HUMAN   | 1.8204575  | 4.509013   |
| sp P01871-2 IGHM_HUMAN  | 1.8457603  | 2.1818786  |
| sp P00747 PLMN_HUMAN    | 1.8601665  | 6.7698927  |
| sp P01861 IGHG4_HUMAN   | 1.9844398  | 3.5908275  |
| sp P68871 HBB_HUMAN     | 2.0491219  | 4.051346   |
| sp P02671 FIBA_HUMAN    | 2.114399   | 11.667864  |
| sp P02675 FIBB_HUMAN    | 2.1256409  | 10.337908  |
| sp P02647 APOA1_HUMAN   | 2.1534443  | 13.420564  |
| sp P02679-2 FIBG_HUMAN  | 2.1585693  | 8.032379   |
| sp P69905 HBA_HUMAN     | 2.2797031  | 4.051346   |
| sp Q9BW04 SARG_HUMAN    | -2.3990269 | 1.1932944  |
| sp O00757 F16P2_HUMAN   | -2.229309  | 1.1932944  |
| sp P04229 2B11_HUMAN    | -1.8554554 | 0.656254   |
| sp Q16777 H2A2C_HUMAN   | -1.4719543 | 1.1932944  |
| sp P33151 CADH5_HUMAN   | -1.4601202 | 1.1932944  |
| sp P28330 ACADL_HUMAN   | -1.3883457 | 1.1932944  |
| sp P26440 IVD_HUMAN     | -1.2620544 | 0.35795313 |
| sp P08263 GSTA1_HUMAN   | -1.2538662 | 0          |
| sp P08246 ELNE_HUMAN    | -1.2312889 | 1.1932944  |
| sp Q13813-3 SPTN1_HUMAN | -1.2164555 | 0.45033538 |
| sp Q93077 H2A1C_HUMAN   | -1.2126312 | 0.7827403  |
| sp P51606-2 RENBP_HUMAN | -1.1966057 | 1.1932944  |
| sp Q9H2U2-3 IPYR2_HUMAN | -1.1861115 | 0.656254   |
| sp P38159 RBMX_HUMAN    | -1.1740837 | 0.656254   |
| sp Q9Y4G6 TLN2_HUMAN    | -1.1711655 | 0.656254   |
| sp P37235 HPCL1_HUMAN   | -1.168849  | 0.656254   |
| sp P12236 ADT3_HUMAN    | -1.1578922 | 1.1932944  |
| sp P08473 NEP_HUMAN     | -1.1403656 | 0.5204253  |
| sp Q6DN03 H2B2C_HUMAN   | -1.1010475 | 1.1932944  |
| sp P12830 CADH1_HUMAN   | -1.0985146 | 0.7827403  |



|                         |            |            |
|-------------------------|------------|------------|
| sp P10412 H14_HUMAN     | -1.0641441 | 1.1932944  |
| sp P16422 EPCAM_HUMAN   | -1.0591497 | 1.1932944  |
| sp P13686 PPA5_HUMAN    | -1.058115  | 1.2773042  |
| sp Q29963 1C06_HUMAN    | -1.0549297 | 0.656254   |
| sp Q13976 KGP1_HUMAN    | -1.0517998 | 0.656254   |
| sp O43795-2 MYO1B_HUMAN | -1.0262566 | 1.1932944  |
| sp P20702 ITAX_HUMAN    | -1.0191116 | 0.656254   |
| sp Q01518 CAP1_HUMAN    | -1.0175076 | 0.656254   |
| sp Q08209-5 PP2BA_HUMAN | -0.9845486 | 0          |
| sp A6NMY6 AXA2L_HUMAN   | -0.9678974 | 0.656254   |
| sp P68371 TBB4B_HUMAN   | -0.9622536 | 1.1932944  |
| sp Q8NBQ5 DHB11_HUMAN   | -0.9567337 | 1.1932944  |
| sp Q03113 GNA12_HUMAN   | -0.9566402 | 0.656254   |
| sp P63218 GBG5_HUMAN    | -0.9474373 | 1.1932944  |
| sp Q9UDY2-3 ZO2_HUMAN   | -0.9432335 | 0.7827403  |
| sp P62834 RAP1A_HUMAN   | -0.9392176 | 0.656254   |
| sp O95837 GNA14_HUMAN   | -0.9356175 | 0.656254   |
| sp P00167-2 CYB5_HUMAN  | -0.9241276 | 0.7588735  |
| sp P13760 2B14_HUMAN    | -0.9157887 | 0.35795313 |
| sp O00592-2 PODXL_HUMAN | -0.9061813 | 1.1932944  |
| sp P16403 H12_HUMAN     | -0.8983154 | 0.656254   |
| sp Q86TX2 ACOT1_HUMAN   | -0.8947792 | 0.656254   |
| sp P63167 DYL1_HUMAN    | -0.8944588 | 0.656254   |
| sp Q03135-2 CAV1_HUMAN  | -0.8930092 | 0.656254   |
| sp P15170-2 ERF3A_HUMAN | -0.8843517 | 1.1932944  |
| sp Q9NUB1-2 ACS2L_HUMAN | -0.8756123 | 1.1932944  |
| sp Q9UHN6-2 CEIP2_HUMAN | -0.8734646 | 1.1932944  |
| sp Q9NPY3 C1QR1_HUMAN   | -0.8456869 | 1.1932944  |
| sp P13761 2B17_HUMAN    | -0.8415566 | 0          |
| sp P06396-2 GELS_HUMAN  | -0.8409748 | 0.656254   |
| sp P62263 RS14_HUMAN    | -0.8321686 | 0.7061832  |
| sp Q14956-2 GPNMB_HUMAN | -0.8242798 | 1.1932944  |
| sp P61956-2 SUMO2_HUMAN | -0.8232918 | 0.656254   |
| sp P61916-2 NPC2_HUMAN  | -0.8198433 | 1.1932944  |
| sp P02462 CO4A1_HUMAN   | -0.8111248 | 0.35795313 |
| sp Q15185-3 TEBP_HUMAN  | -0.8107376 | 0.19149946 |
| sp P28799-3 GRN_HUMAN   | -0.7921963 | 0.5204253  |
| sp Q7L2H7 EIF3M_HUMAN   | -0.7911072 | 0.656254   |
| sp Q9Y394-2 DHRS7_HUMAN | -0.7859459 | 0.7588735  |
| sp P04839 CY24B_HUMAN   | -0.782939  | 0          |
| sp P27635 RL10_HUMAN    | -0.7805595 | 0.656254   |
| sp P12235 ADT1_HUMAN    | -0.7774696 | 0.656254   |
| sp P16104 H2AX_HUMAN    | -0.7733955 | 0.656254   |
| sp Q15286 RAB35_HUMAN   | -0.7589693 | 0.656254   |
| sp Q05315 LEG10_HUMAN   | -0.7585125 | 1.1932944  |

|                         |            |            |
|-------------------------|------------|------------|
| sp O94811 TPPP_HUMAN    | -0.7580013 | 1.1932944  |
| sp P61224 RAP1B_HUMAN   | -0.7505608 | 0.656254   |
| sp Q9NPJ3 ACO13_HUMAN   | -0.7464733 | 1.1932944  |
| sp O95716 RAB3D_HUMAN   | -0.745944  | 0.656254   |
| sp P61586 RHOA_HUMAN    | -0.7441158 | 1.1932944  |
| sp Q9HD89 RETN_HUMAN    | -0.7410297 | 1.1932944  |
| sp P62745 RHOB_HUMAN    | -0.734437  | 0.656254   |
| sp Q15056-2 IF4H_HUMAN  | -0.7316876 | 1.1932944  |
| sp O76041-2 NEBL_HUMAN  | -0.7254105 | 0.656254   |
| sp Q12846 STX4_HUMAN    | -0.7253094 | 0.656254   |
| sp P22894 MMP8_HUMAN    | -0.7251968 | 0          |
| sp O00712-4 NFIB_HUMAN  | -0.7243271 | 0.656254   |
| sp Q01955 CO4A3_HUMAN   | -0.7185288 | 1.1932944  |
| sp P11387 TOP1_HUMAN    | -0.7177906 | 1.1932944  |
| sp Q9NVJ2 ARL8B_HUMAN   | -0.7166348 | 1.1932944  |
| sp P08962-2 CD63_HUMAN  | -0.7019539 | 1.1932944  |
| sp P15559-2 NQO1_HUMAN  | -0.6899967 | 1.1932944  |
| sp Q96FV2-2 SCRN2_HUMAN | -0.6884117 | 1.1932944  |
| sp P42167 LAP2B_HUMAN   | -0.6855087 | 1.1932944  |
| sp O95197-2 RTN3_HUMAN  | -0.6790352 | 1.1932944  |
| sp P16930 FAAA_HUMAN    | -0.6746769 | 0.656254   |
| sp Q9UBR2 CATZ_HUMAN    | -0.6736412 | 1.1932944  |
| sp P52788-2 SPSY_HUMAN  | -0.6457806 | 1.1932944  |
| sp Q13283 G3BP1_HUMAN   | -0.6445217 | 1.1932944  |
| sp Q92522 H1X_HUMAN     | -0.6408482 | 1.1932944  |
| sp P61601 NCALD_HUMAN   | -0.6402178 | 0.656254   |
| sp Q13813-2 SPTN1_HUMAN | -0.6209335 | 1.1932944  |
| sp Q15637-2 SF01_HUMAN  | -0.6205444 | 1.1932944  |
| sp P31946-2 1433B_HUMAN | -0.6197014 | 0.656254   |
| sp Q32MZ4-3 LRRF1_HUMAN | -0.6183491 | 1.1932944  |
| sp P31153 METK2_HUMAN   | -0.6175098 | 0.656254   |
| sp P48509 CD151_HUMAN   | -0.6122685 | 1.1932944  |
| sp P54108-2 CRIS3_HUMAN | -0.6093102 | 0.656254   |
| sp P28676 GRAN_HUMAN    | -0.595995  | 1.1932944  |
| sp Q9H8L6 MMRN2_HUMAN   | -0.5947304 | 1.1932944  |
| sp P10619-2 PPGB_HUMAN  | -0.5943699 | 1.1932944  |
| sp Q53GQ0 DHB12_HUMAN   | -0.5911293 | 0.35795313 |
| sp P18077 RL35A_HUMAN   | -0.5818653 | 0.7588735  |
| sp O60504-2 VINEX_HUMAN | -0.5816498 | 1.1791906  |
| sp Q5SSJ5-2 HP1B3_HUMAN | -0.5810852 | 1.0485198  |
| sp P01892 1A02_HUMAN    | -0.5765915 | 0.7061832  |
| sp Q07075 AMPE_HUMAN    | -0.575882  | 0.40256184 |
| sp Q8NBF2-2 NHLC2_HUMAN | -0.5754433 | 1.1932944  |
| sp P07948-2 LYN_HUMAN   | -0.5676804 | 1.1932944  |
| sp Q6YN16 HSDL2_HUMAN   | -0.5666533 | 0.5204253  |

|                         |            |            |
|-------------------------|------------|------------|
| sp A5A3E0 POTEF_HUMAN   | -0.5655975 | 0.656254   |
| sp Q16822 PCKGM_HUMAN   | -0.5609779 | 1.1932944  |
| sp P06703 S10A6_HUMAN   | -0.5554199 | 1.1932944  |
| sp P51153 RAB13_HUMAN   | -0.5526638 | 0.656254   |
| sp Q7Z4I7-3 LIMS2_HUMAN | -0.5521679 | 1.1932944  |
| sp Q13404 UB2V1_HUMAN   | -0.5459404 | 0.35795313 |
| sp Q13938-4 CAYP1_HUMAN | -0.5442753 | 0          |
| sp P26368-2 U2AF2_HUMAN | -0.5435963 | 1.1932944  |
| sp P31948 STIP1_HUMAN   | -0.5432472 | 0.656254   |
| sp Q9HB71 CYBP_HUMAN    | -0.5415335 | 1.1932944  |
| sp P01111 RASN_HUMAN    | -0.529398  | 0.656254   |
| sp Q9NX63 MIC19_HUMAN   | -0.5273209 | 1.1932944  |
| sp P55327-3 TPD52_HUMAN | -0.5262871 | 1.1932944  |
| sp O76003 GLRX3_HUMAN   | -0.5217857 | 0.656254   |
| sp Q9NYF8-2 BCLF1_HUMAN | -0.5206013 | 1.1932944  |
| sp Q8NF91-4 SYNE1_HUMAN | -0.5163097 | 1.1932944  |
| sp P02741 CRP_HUMAN     | -0.5151634 | 1.1932944  |
| sp Q15181 IPYR_HUMAN    | -0.5111656 | 0.6298893  |
| sp Q9H2G2-2 SLK_HUMAN   | -0.5098763 | 1.1932944  |
| sp P51991-2 ROA3_HUMAN  | -0.5060215 | 0.656254   |
| sp P01920 DQB1_HUMAN    | -0.5044251 | 1.1932944  |
| sp P42126-2 ECI1_HUMAN  | -0.5030556 | 1.1932944  |
| sp P04222 1C03_HUMAN    | -0.5027523 | 0.656254   |
| sp P29972-2 AQP1_HUMAN  | -0.5013275 | 1.1932944  |
| sp P23786 CPT2_HUMAN    | -0.5007935 | 0.6298893  |
| sp P11234-2 RALB_HUMAN  | -0.4998837 | 0.656254   |
| sp Q9NTX5-6 ECHD1_HUMAN | -0.4980316 | 1.0370445  |
| sp P31946 1433B_HUMAN   | -0.4904842 | 0.656254   |
| sp Q9NNW7 TRXR2_HUMAN   | -0.489727  | 0.6298893  |
| sp E9PAV3 NACAM_HUMAN   | -0.4771118 | 1.1932944  |
| sp Q6ZVM7-3 TM1L2_HUMAN | -0.4725647 | 1.1932944  |
| sp P08621-3 RU17_HUMAN  | -0.4671021 | 0.84879977 |
| sp Q04837 SSBP_HUMAN    | -0.4654331 | 1.1932944  |
| sp Q9UH99-3 SUN2_HUMAN  | -0.4631825 | 0.7588735  |
| sp P62854 RS26_HUMAN    | -0.4628353 | 1.1932944  |
| sp P62244 RS15A_HUMAN   | -0.4622421 | 1.1932944  |
| sp Q8TD06 AGR3_HUMAN    | -0.4597416 | 0.7827403  |
| sp P08236-2 BGLR_HUMAN  | -0.4553299 | 0.7588735  |
| sp Q13435 SF3B2_HUMAN   | -0.4550533 | 1.1932944  |
| sp Q71UM5 RS27L_HUMAN   | -0.4548531 | 1.1932944  |
| sp Q9ULZ3-2 ASC_HUMAN   | -0.4542522 | 0.7827403  |
| sp Q6P4A8 PLBL1_HUMAN   | -0.4541788 | 0.7588735  |
| sp P35268 RL22_HUMAN    | -0.4510155 | 0.7061832  |
| sp P84243 H33_HUMAN     | -0.4500084 | 0.656254   |
| sp Q09028-3 RBBP4_HUMAN | -0.448534  | 0.656254   |

|                         |            |            |
|-------------------------|------------|------------|
| sp P48047 ATPO_HUMAN    | -0.4480419 | 0.56808305 |
| sp Q5TFE4 NT5D1_HUMAN   | -0.4473324 | 1.1932944  |
| sp Q86W92-2 LIPB1_HUMAN | -0.4465818 | 1.1932944  |
| sp P04440 DPB1_HUMAN    | -0.4457512 | 1.1932944  |
| sp P29466-2 CASP1_HUMAN | -0.4420166 | 0.656254   |
| sp Q96HD1 CREL1_HUMAN   | -0.4332867 | 0.7827403  |
| sp Q9UQ80 PA2G4_HUMAN   | -0.4320259 | 0.656254   |
| sp P61160 ARP2_HUMAN    | -0.4308262 | 1.1932944  |
| sp P62826 RAN_HUMAN     | -0.4283295 | 0.87291557 |
| sp Q9UNE7-2 CHIP_HUMAN  | -0.424551  | 1.1932944  |
| sp Q96JB5-4 CK5P3_HUMAN | -0.4224472 | 0.7061832  |
| sp P60033 CD81_HUMAN    | -0.4212418 | 1.1932944  |
| sp Q9Y3A3-3 PHOCN_HUMAN | -0.4208012 | 0.45033538 |
| sp Q9UBS4 DJB11_HUMAN   | -0.4152489 | 1.1932944  |
| sp P61313 RL15_HUMAN    | -0.4148121 | 0.19149946 |
| sp Q7L1Q6-2 BZW1_HUMAN  | -0.4144335 | 1.0301651  |
| sp P20160 CAP7_HUMAN    | -0.4134865 | 1.1505735  |
| sp Q08170 SRSF4_HUMAN   | -0.4131107 | 0.656254   |
| sp P35754 GLRX1_HUMAN   | -0.4123421 | 0.95332193 |
| sp P23193-2 TCEA1_HUMAN | -0.4121523 | 0.35795313 |
| sp Q14697 GANAB_HUMAN   | -0.4115458 | 1.1932944  |
| sp P31943 HNRH1_HUMAN   | -0.4083214 | 0.6509351  |
| sp Q96TC7 RMD3_HUMAN    | -0.4072056 | 0.5204253  |
| sp P62910 RL32_HUMAN    | -0.4066734 | 1.1932944  |
| sp Q9NVD7 PARVA_HUMAN   | -0.4061165 | 0.19149946 |
| sp P29400-2 CO4A5_HUMAN | -0.404397  | 0.656254   |
| sp Q9BRA2 TXD17_HUMAN   | -0.40028   | 1.0485198  |
| sp Q13177 PAK2_HUMAN    | -0.3999119 | 1.1932944  |
| sp Q8N684-3 CPSF7_HUMAN | -0.3988466 | 0.6070219  |
| sp P29992 GNA11_HUMAN   | -0.396656  | 1.1932944  |
| sp Q13200 PSMD2_HUMAN   | -0.3952713 | 0.7061832  |
| sp P62995-3 TRA2B_HUMAN | -0.3950386 | 1.1932944  |
| sp P06239-3 LCK_HUMAN   | -0.3925095 | 0.656254   |
| sp Q9HCC0 MCCB_HUMAN    | -0.3919983 | 0.6509351  |
| sp Q9NUJ1-3 ABHDA_HUMAN | -0.3918152 | 0          |
| sp P12081-4 SYHC_HUMAN  | -0.391386  | 0.91601294 |
| sp Q13838-2 DX39B_HUMAN | -0.3909435 | 0.6298893  |
| sp Q9BQE3 TBA1C_HUMAN   | -0.3900061 | 0.656254   |
| sp P51553-2 IDH3G_HUMAN | -0.3868084 | 1.1932944  |
| sp P40306 PSB10_HUMAN   | -0.3864136 | 1.0485198  |
| sp Q9UBW8 CSN7A_HUMAN   | -0.3834124 | 1.1505735  |
| sp Q96IJ6-2 GMPPA_HUMAN | -0.3825779 | 0.7827403  |
| sp Q8NC51-3 PAIRB_HUMAN | -0.381237  | 1.1932944  |
| sp Q06136 KDSR_HUMAN    | -0.3801785 | 1.1932944  |
| sp P63000-2 RAC1_HUMAN  | -0.3797512 | 0.91601294 |

|                         |            |            |
|-------------------------|------------|------------|
| sp P09601 HMOX1_HUMAN   | -0.3792114 | 0.8983557  |
| sp O14744 ANM5_HUMAN    | -0.3790913 | 1.1932944  |
| sp Q86Y82 STX12_HUMAN   | -0.3778172 | 1.1791906  |
| sp P48163-2 MAOX_HUMAN  | -0.3768244 | 0.5204253  |
| sp P63220 RS21_HUMAN    | -0.3711052 | 1.1932944  |
| sp Q9Y371-2 SHLB1_HUMAN | -0.3703404 | 0.656254   |
| sp P61457 PHS_HUMAN     | -0.3692532 | 0.7827403  |
| sp P07437 TBB5_HUMAN    | -0.3680992 | 1.0485198  |
| sp P62495-2 ERF1_HUMAN  | -0.3666143 | 0.7061832  |
| sp O00186 STXB3_HUMAN   | -0.3632689 | 0.45033538 |
| sp Q03154-4 ACY1_HUMAN  | -0.3631201 | 0.5204253  |
| sp P11717 MPRI_HUMAN    | -0.362299  | 1.1932944  |
| sp Q13642-1 FHL1_HUMAN  | -0.3599415 | 0.656254   |
| sp P62316-2 SMD2_HUMAN  | -0.3584671 | 1.2773042  |
| sp P30838 AL3A1_HUMAN   | -0.3564644 | 0.7827403  |
| sp P30419-2 NMT1_HUMAN  | -0.3558598 | 0.656254   |
| sp P36871 PGM1_HUMAN    | -0.3540859 | 0.7827403  |
| sp Q9NSE4 SYIM_HUMAN    | -0.3531151 | 0.95332193 |
| sp Q14914-2 PTGR1_HUMAN | -0.3526859 | 0.6298893  |
| sp Q9C0B1 FTO_HUMAN     | -0.3490791 | 0          |
| sp O60784-3 TOM1_HUMAN  | -0.3485413 | 0.656254   |
| sp P50452 SPB8_HUMAN    | -0.347641  | 1.1932944  |
| sp P60228 EIF3E_HUMAN   | -0.3466415 | 0.6298893  |
| sp P36551 HEM6_HUMAN    | -0.3464699 | 0.45033538 |
| sp P11217 PYGM_HUMAN    | -0.3462925 | 0.656254   |
| sp P08134 RHOC_HUMAN    | -0.346056  | 0.19149946 |
| sp Q9Y305-4 ACOT9_HUMAN | -0.3446331 | 0.7827403  |
| sp O75608-2 LYPA1_HUMAN | -0.344326  | 1.1932944  |
| sp P17213 BPI_HUMAN     | -0.3441563 | 1.2095301  |
| sp P62136 PP1A_HUMAN    | -0.3432388 | 1.1505735  |
| sp Q9NZB2-6 F120A_HUMAN | -0.3428078 | 1.1932944  |
| sp P16070-7 CD44_HUMAN  | -0.3409843 | 0.91601294 |
| sp O00483 NDUA4_HUMAN   | -0.3396587 | 1.1932944  |
| sp Q9Y639-4 NPTN_HUMAN  | -0.3393498 | 1.1932944  |
| sp Q9Y2Q5 LTOR2_HUMAN   | -0.3389454 | 0.7827403  |
| sp Q86U42-2 PABP2_HUMAN | -0.3382225 | 0.656254   |
| sp Q14894 CRYM_HUMAN    | -0.335825  | 0          |
| sp O14936-2 CSKP_HUMAN  | -0.3344803 | 0.65625405 |
| sp P53634 CATC_HUMAN    | -0.3338261 | 0.5204253  |
| sp Q99729-3 ROAA_HUMAN  | -0.3330402 | 0.7957244  |
| sp P60866-2 RS20_HUMAN  | -0.3329086 | 1.1932944  |
| sp P12955 PEPD_HUMAN    | -0.3319321 | 0.34323573 |
| sp Q32P44 EMAL3_HUMAN   | -0.3312359 | 1.2773042  |
| sp Q14152 EIF3A_HUMAN   | -0.3308945 | 0.35795313 |
| sp P53041 PPP5_HUMAN    | -0.3297539 | 0.5204253  |

|                         |            |            |
|-------------------------|------------|------------|
| sp Q96BM9 ARL8A_HUMAN   | -0.3293686 | 0.656254   |
| sp Q08257 QOR_HUMAN     | -0.3283958 | 0.9847622  |
| sp P48059-3 LIMS1_HUMAN | -0.3279991 | 0.656254   |
| sp Q14498-2 RBM39_HUMAN | -0.3271027 | 0.14672586 |
| sp P63261 ACTG_HUMAN    | -0.3267708 | 0.656254   |
| sp P28072 PSB6_HUMAN    | -0.3264465 | 0.91601294 |
| sp P52789 HXK2_HUMAN    | -0.3239899 | 0.656254   |
| sp P08754 GNAI3_HUMAN   | -0.3234291 | 1.0485198  |
| sp P78406 RAE1L_HUMAN   | -0.3229294 | 1.1932944  |
| sp Q06278 AOXA_HUMAN    | -0.3226738 | 0.7827403  |
| sp P10599-2 THIO_HUMAN  | -0.3211651 | 0.40256184 |
| sp P09917 LOX5_HUMAN    | -0.3209229 | 1.1791906  |
| sp Q9BTE1 DCTN5_HUMAN   | -0.3190403 | 1.1932944  |
| sp Q6NVY1 HIBCH_HUMAN   | -0.3181191 | 0.5111962  |
| sp O94905 ERLN2_HUMAN   | -0.3164482 | 1.1932944  |
| sp P63241 IF5A1_HUMAN   | -0.3137636 | 0.656254   |
| sp P14923 PLAK_HUMAN    | -0.3135834 | 1.0485198  |
| sp O14745 NHRF1_HUMAN   | -0.3117981 | 0.5204253  |
| sp Q15149-3 PLEC_HUMAN  | -0.3114891 | 0.656254   |
| sp P63151-2 2ABA_HUMAN  | -0.3094063 | 1.1932944  |
| sp Q99715-4 COCA1_HUMAN | -0.3079319 | 0.5204253  |
| sp O43143 DHX15_HUMAN   | -0.3077774 | 1.0634323  |
| sp Q9BWS9-3 CHID1_HUMAN | -0.3077164 | 0.656254   |
| sp P80188 NGAL_HUMAN    | -0.3072796 | 1.0370445  |
| sp Q9UKK9 NUDT5_HUMAN   | -0.3037071 | 0.7827403  |
| sp Q9H3N1 TMX1_HUMAN    | -0.3032684 | 0.7061832  |
| sp Q9NR56-2 MBNL1_HUMAN | -0.3031731 | 1.1932944  |
| sp Q9UHQ9 NB5R1_HUMAN   | -0.3019428 | 1.0485198  |
| sp Q96S97 MYADM_HUMAN   | -0.300745  | 1.1932944  |
| sp P52790 HXK3_HUMAN    | -0.3002071 | 1.1791906  |
| sp P49458 SRP09_HUMAN   | -0.2992039 | 0.7827403  |
| sp P30049 ATPD_HUMAN    | -0.2985115 | 1.1932944  |
| sp O75828 CBR3_HUMAN    | -0.2984085 | 1.1932944  |
| sp Q9UGI8-2 TES_HUMAN   | -0.2969837 | 0.91072154 |
| sp P42566 EPS15_HUMAN   | -0.2958756 | 1.1932944  |
| sp Q5JPE7-2 NOMO2_HUMAN | -0.2958202 | 0.5204253  |
| sp Q9P2J5-2 SYLC_HUMAN  | -0.2957869 | 0.19149946 |
| sp P30566 PUR8_HUMAN    | -0.2956886 | 0.656254   |
| sp Q9H0W9-2 CK054_HUMAN | -0.2954874 | 1.3006523  |
| sp Q14011-2 CIRBP_HUMAN | -0.2936173 | 1.0301651  |
| sp O60832 DKC1_HUMAN    | -0.2931099 | 1.1932944  |
| sp Q9BW30 TPPP3_HUMAN   | -0.2912846 | 0.9533461  |
| sp O14786 NRP1_HUMAN    | -0.2911253 | 0.7827403  |
| sp Q6IAA8 LTOR1_HUMAN   | -0.2906761 | 1.1932944  |
| sp Q8IV08 PLD3_HUMAN    | -0.2906113 | 0.5204253  |

|                         |            |            |
|-------------------------|------------|------------|
| sp P78417-3 GSTO1_HUMAN | -0.2888222 | 0.7827403  |
| sp P61006 RAB8A_HUMAN   | -0.2880087 | 1.1932944  |
| sp Q9HAV0 GBB4_HUMAN    | -0.2850351 | 0.2178309  |
| sp Q96C86 DCPS_HUMAN    | -0.2837124 | 0.5204253  |
| sp Q15366-2 PCBP2_HUMAN | -0.2836685 | 0.91601294 |
| sp Q7LG56-6 RIR2B_HUMAN | -0.2834005 | 0.7827403  |
| sp P63010-2 AP2B1_HUMAN | -0.283186  | 1.214352   |
| sp P30084 ECHM_HUMAN    | -0.2814617 | 1.3006523  |
| sp Q9H4G4 GAPR1_HUMAN   | -0.2805405 | 1.1505735  |
| sp Q8NHP8 PLBL2_HUMAN   | -0.2784824 | 0.19149946 |
| sp Q96C23 GALM_HUMAN    | -0.2784004 | 0.5204253  |
| sp A0AVT1 UBA6_HUMAN    | -0.2769051 | 1.2941489  |
| sp O43684-2 BUB3_HUMAN  | -0.2765408 | 1.1932944  |
| sp P06753-2 TPM3_HUMAN  | -0.274292  | 0.7827403  |
| sp O14773 TPP1_HUMAN    | -0.2731648 | 0.7588735  |
| sp P04424-2 ARLY_HUMAN  | -0.2724819 | 0.74639726 |
| sp Q8TD55 PKHO2_HUMAN   | -0.2709131 | 0          |
| sp P09417-2 DHPR_HUMAN  | -0.2708931 | 0.19149946 |
| sp P54819-2 KAD2_HUMAN  | -0.2694664 | 0.35795313 |
| sp Q9H299 SH3L3_HUMAN   | -0.2691193 | 1.1932944  |
| sp Q13247-3 SRSF6_HUMAN | -0.2689304 | 0.7827403  |
| sp P13284 GILT_HUMAN    | -0.2686806 | 0.91601294 |
| sp Q96RQ3 MCCA_HUMAN    | -0.267376  | 1.2095301  |
| sp P26373 RL13_HUMAN    | -0.2673264 | 0.8983557  |
| sp Q96BW5-2 PTER_HUMAN  | -0.2657356 | 0          |
| sp Q9Y376 CAB39_HUMAN   | -0.2656651 | 1.0301651  |
| sp Q9NZL9 MAT2B_HUMAN   | -0.2646008 | 0.6298893  |
| sp P51688 SPHM_HUMAN    | -0.2639923 | 1.2095301  |
| sp Q9NZU5-2 LMCD1_HUMAN | -0.2629719 | 1.0475321  |
| sp P61353 RL27_HUMAN    | -0.2622356 | 1.1932944  |
| sp P36873-2 PP1G_HUMAN  | -0.2622299 | 1.1932944  |
| sp P62714 PP2AB_HUMAN   | -0.2622109 | 0.656254   |
| sp O43747-2 AP1G1_HUMAN | -0.260685  | 0.8983557  |
| sp Q7Z7H5-3 TMED4_HUMAN | -0.2591667 | 1.1932944  |
| sp P62424 RL7A_HUMAN    | -0.2575016 | 1.0634323  |
| sp P17612 KAPCA_HUMAN   | -0.2568932 | 0.8983557  |
| sp O95833 CLIC3_HUMAN   | -0.2566814 | 0.1558116  |
| sp Q9BZF9-2 UACA_HUMAN  | -0.2563515 | 0.45033538 |
| sp Q9NSD9 SYFB_HUMAN    | -0.2562103 | 0.8983557  |
| sp Q96CW1-2 AP2M1_HUMAN | -0.2555294 | 0.8983557  |
| sp P61163 ACTZ_HUMAN    | -0.2536926 | 0.8983557  |
| sp Q9NP72 RAB18_HUMAN   | -0.2536526 | 0.8983557  |
| sp P62942 FKB1A_HUMAN   | -0.2528687 | 0.656254   |
| sp O15372 EIF3H_HUMAN   | -0.252347  | 0.35795313 |
| sp P21912 SDHB_HUMAN    | -0.2523346 | 0.7061832  |

|                         |            |            |
|-------------------------|------------|------------|
| sp O15260-2 SURF4_HUMAN | -0.2516632 | 0.45033538 |
| sp Q13263 TIF1B_HUMAN   | -0.2512665 | 1.2109947  |
| sp P61758 PFD3_HUMAN    | -0.2499809 | 0.7827403  |
| sp P47985 UCRI_HUMAN    | -0.2471008 | 0.7061832  |
| sp Q9NQC3 RTN4_HUMAN    | -0.2470551 | 1.2095301  |
| sp Q02952-2 AKA12_HUMAN | -0.2460671 | 0          |
| sp P12004 PCNA_HUMAN    | -0.2456703 | 1.1932944  |
| sp P61225 RAP2B_HUMAN   | -0.2455263 | 1.1932944  |
| sp POC055 H2AZ_HUMAN    | -0.244442  | 0.656254   |
| sp Q9UNM6-2 PSD13_HUMAN | -0.2443142 | 1.0634323  |
| sp P10644 KAP0_HUMAN    | -0.2441559 | 0.6070219  |
| sp P53396-2 ACLY_HUMAN  | -0.2430153 | 0.99757636 |
| sp P42226 STAT6_HUMAN   | -0.2428532 | 0.656254   |
| sp P62266 RS23_HUMAN    | -0.2417908 | 0.65625405 |
| sp P23368 MAOM_HUMAN    | -0.240696  | 0.93112767 |
| sp Q96C19 EFHD2_HUMAN   | -0.2406769 | 1.1505735  |
| sp P12694 ODBA_HUMAN    | -0.2400513 | 0.7061832  |
| sp P55809 SCOT1_HUMAN   | -0.2399292 | 0.35795313 |
| sp O75923-11 DYSF_HUMAN | -0.2398949 | 0.04707252 |
| sp P60709 ACTB_HUMAN    | -0.238327  | 0          |
| sp P29144 TPP2_HUMAN    | -0.2347889 | 0.1558116  |
| sp P26599-2 PTBP1_HUMAN | -0.2311459 | 1.1687785  |
| sp Q92905 CSN5_HUMAN    | -0.2304936 | 0          |
| sp O43252 PAPS1_HUMAN   | -0.2302322 | 0.09894868 |
| sp Q15274 NADC_HUMAN    | -0.2296143 | 0.5204253  |
| sp Q9UIJ7 KAD3_HUMAN    | -0.2293263 | 1.1240381  |
| sp Q02790 FKBP4_HUMAN   | -0.2291393 | 1.0485198  |
| sp O43776 SYNC_HUMAN    | -0.2289372 | 0.79861414 |
| sp P22059 OSBP1_HUMAN   | -0.2279854 | 1.1932944  |
| sp P15153 RAC2_HUMAN    | -0.2277737 | 0.656254   |
| sp O00567 NOP56_HUMAN   | -0.2266712 | 0.34137914 |
| sp Q96MM6 HS12B_HUMAN   | -0.226017  | 0.24097534 |
| sp P62140 PP1B_HUMAN    | -0.2240238 | 1.1505735  |
| sp P31942-2 HNRH3_HUMAN | -0.2217197 | 1.0634323  |
| sp O00534 VMA5A_HUMAN   | -0.2216549 | 0.3005443  |
| sp P12268 IMDH2_HUMAN   | -0.220747  | 0          |
| sp O14828-2 SCAM3_HUMAN | -0.2202301 | 0.35795313 |
| sp Q15833-2 STXB2_HUMAN | -0.2200851 | 0.7827403  |
| sp P84095 RHOG_HUMAN    | -0.2183323 | 0.5204253  |
| sp P55209-2 NP1L1_HUMAN | -0.2179508 | 0.656254   |
| sp P04632 CPNS1_HUMAN   | -0.217268  | 0.9329067  |
| sp O60701-2 UGDH_HUMAN  | -0.216444  | 0          |
| sp Q9H9B4 SFXN1_HUMAN   | -0.2156639 | 1.1932944  |
| sp Q8NDH3 PEPL1_HUMAN   | -0.2156563 | 1.0485198  |
| sp P13693 TCTP_HUMAN    | -0.2138596 | 0.19149946 |



|                         |            |            |
|-------------------------|------------|------------|
| sp P16671-4 CD36_HUMAN  | -0.2136784 | 1.2095301  |
| sp P28066 PSA5_HUMAN    | -0.2126808 | 1.3006523  |
| sp Q9Y2B0 CNPY2_HUMAN   | -0.2110195 | 0.09894868 |
| sp P55265-4 DSRAD_HUMAN | -0.2096806 | 0.35795313 |
| sp P68400 CSK21_HUMAN   | -0.2092476 | 0.61034113 |
| sp Q9NYL9 TMOD3_HUMAN   | -0.2087517 | 0          |
| sp P48739 PIPNB_HUMAN   | -0.2081757 | 0.45033538 |
| sp P24158 PRTN3_HUMAN   | -0.2076092 | 0.2178309  |
| sp Q9UKV3-5 ACINU_HUMAN | -0.2073059 | 0.8983557  |
| sp P06865 HEXA_HUMAN    | -0.2071686 | 0.35795313 |
| sp P39687 AN32A_HUMAN   | -0.2052918 | 1.1505735  |
| sp Q6NY19-2 KANK3_HUMAN | -0.2045479 | 0.7827403  |
| sp P13861 KAP2_HUMAN    | -0.2045002 | 1.1034192  |
| sp P05534 1A24_HUMAN    | -0.2041206 | 0.5204253  |
| sp O14617-4 AP3D1_HUMAN | -0.2037735 | 0.45033538 |
| sp Q16539-2 MK14_HUMAN  | -0.2036743 | 0.19149946 |
| sp P36542-2 ATPG_HUMAN  | -0.2026434 | 0.656254   |
| sp O75340-2 PDCD6_HUMAN | -0.2024212 | 0.35795313 |
| sp Q99829 CPNE1_HUMAN   | -0.2004013 | 0.6509351  |
| sp P50395 GDIB_HUMAN    | -0.1990891 | 0.82809293 |
| sp Q92769 HDAC2_HUMAN   | -0.1990471 | 0.656254   |
| sp Q15631 TSN_HUMAN     | -0.1975956 | 0.06291623 |
| sp P49961-6 ENTP1_HUMAN | -0.1975021 | 0.35795313 |
| sp Q13232 NDK3_HUMAN    | -0.1974106 | 0.6298893  |
| sp Q9HD45 TM9S3_HUMAN   | -0.1967049 | 0          |
| sp P62701 RS4X_HUMAN    | -0.1963139 | 0.5111962  |
| sp P62314 SMD1_HUMAN    | -0.1961021 | 0.45033538 |
| sp P61081 UBC12_HUMAN   | -0.1955872 | 0.79861414 |
| sp P08572 CO4A2_HUMAN   | -0.1951428 | 1.0951192  |
| sp P55263 ADK_HUMAN     | -0.1929112 | 0.8983557  |
| BirA-TRIP6_BirAT6       | -0.1922684 | 0.45033538 |
| sp P16298-4 PP2BB_HUMAN | -0.1922379 | 0.6070219  |
| sp Q92696 PGTA_HUMAN    | -0.1916466 | 0.79861414 |
| sp Q8NBJ5 GT251_HUMAN   | -0.19137   | 1.1505735  |
| sp Q15121 PEA15_HUMAN   | -0.1904755 | 0.2178309  |
| sp P11279 LAMP1_HUMAN   | -0.190115  | 0.19149946 |
| sp O60234 GMFG_HUMAN    | -0.1900387 | 0.2178309  |
| sp P54727 RD23B_HUMAN   | -0.1893253 | 0.91601294 |
| sp Q9P2T1-2 GMPR2_HUMAN | -0.1889095 | 0.09339783 |
| sp P57088 TMM33_HUMAN   | -0.1876469 | 0.45033538 |
| sp P54136 SYRC_HUMAN    | -0.1870594 | 0.65625405 |
| sp P61088 UBE2N_HUMAN   | -0.1857834 | 0.45033538 |
| sp P45954-2 ACDSB_HUMAN | -0.1855202 | 0.19149946 |
| sp Q9HC38 GLOD4_HUMAN   | -0.1844177 | 0.8339169  |
| sp P11586 C1TC_HUMAN    | -0.1836376 | 0.5204253  |

|                         |            |            |
|-------------------------|------------|------------|
| sp P24557-2 THAS_HUMAN  | -0.1829262 | 0.45033538 |
| sp P07741 APT_HUMAN     | -0.1824532 | 0.43103603 |
| sp A6NMZ7 CO6A6_HUMAN   | -0.1816902 | 0.9847622  |
| sp Q13423 NNTM_HUMAN    | -0.1816559 | 0.6115017  |
| sp Q13492-2 PICAL_HUMAN | -0.1812382 | 0.2178309  |
| sp O15511 ARPC5_HUMAN   | -0.1810036 | 1.2095301  |
| sp Q08945 SSRP1_HUMAN   | -0.1807556 | 0.84879977 |
| sp P09874 PARP1_HUMAN   | -0.1801186 | 0.7957244  |
| sp Q13884 SNTB1_HUMAN   | -0.1796837 | 0          |
| sp P52895 AK1C2_HUMAN   | -0.17941   | 0.19149946 |
| sp Q9Y262-2 EIF3L_HUMAN | -0.1792469 | 0.5832693  |
| sp Q9Y696 CLIC4_HUMAN   | -0.1781616 | 0.23541966 |
| sp Q9Y3F4-2 STRAP_HUMAN | -0.1773987 | 0.35795313 |
| sp Q01813-2 PFKAP_HUMAN | -0.1759987 | 0.37060758 |
| sp O75112-7 LDB3_HUMAN  | -0.1751938 | 0.35795313 |
| sp O00232 PSD12_HUMAN   | -0.1751804 | 0.35193655 |
| sp Q6DD88 ATLA3_HUMAN   | -0.1743622 | 0.7957244  |
| sp P07203 GPX1_HUMAN    | -0.1743279 | 0          |
| sp P62879 GBB2_HUMAN    | -0.1726532 | 0.30372584 |
| sp P24534 EF1B_HUMAN    | -0.1726017 | 0.7827403  |
| sp O15067 PUR4_HUMAN    | -0.1722183 | 1.1932944  |
| sp P49593-2 PPM1F_HUMAN | -0.1720772 | 0.30372584 |
| sp Q9NUV9 GIMA4_HUMAN   | -0.1718903 | 0.17171621 |
| sp Q16363-2 LAMA4_HUMAN | -0.1714029 | 0.95703053 |
| sp Q14165 MLEC_HUMAN    | -0.1707001 | 0.7061832  |
| sp Q9Y5M8 SRPRB_HUMAN   | -0.1705074 | 0.40256184 |
| sp Q9BRF8-2 CPPED_HUMAN | -0.1700916 | 0.35795313 |
| sp P48681 NEST_HUMAN    | -0.1700325 | 0.5474665  |
| sp Q30154 DRB5_HUMAN    | -0.1697693 | 0          |
| sp Q16629-2 SRSF7_HUMAN | -0.1697216 | 0.40256184 |
| sp Q9Y6A4 CFA20_HUMAN   | -0.1689777 | 0.45033538 |
| sp P22314 UBA1_HUMAN    | -0.1684513 | 0.62441224 |
| sp POCG39 POTEJ_HUMAN   | -0.1682377 | 0          |
| sp P33176 KINH_HUMAN    | -0.1677656 | 0.7118947  |
| sp P34897-2 GLYM_HUMAN  | -0.1671352 | 1.0370445  |
| sp P22033 MUTA_HUMAN    | -0.1655178 | 0.5204253  |
| sp P22061-2 PIMT_HUMAN  | -0.163353  | 1.2095301  |
| sp P31937 3HIDH_HUMAN   | -0.1628838 | 0.35795313 |
| sp Q86UX2-2 ITIH5_HUMAN | -0.162281  | 0.312067   |
| sp Q562R1 ACTBL_HUMAN   | -0.1615028 | 0          |
| sp P62277 RS13_HUMAN    | -0.1603108 | 1.0485198  |
| sp Q9Y3B3 TMED7_HUMAN   | -0.1596642 | 1.1932944  |
| sp Q9Y3D6 FIS1_HUMAN    | -0.1586695 | 0.5204253  |
| sp Q9UN86-2 G3BP2_HUMAN | -0.1584501 | 0          |
| sp P55884-2 EIF3B_HUMAN | -0.1583366 | 0.26737198 |

|                         |            |            |
|-------------------------|------------|------------|
| sp Q14254 FLOT2_HUMAN   | -0.158186  | 0.45720983 |
| sp O15173-2 PGRC2_HUMAN | -0.1575871 | 0.40256184 |
| sp P30520 PURA2_HUMAN   | -0.157095  | 0.45720983 |
| sp Q96G03 PGM2_HUMAN    | -0.1566505 | 0.7022581  |
| sp P23229-4 ITA6_HUMAN  | -0.1561813 | 1.1932944  |
| sp O15400-2 STX7_HUMAN  | -0.1559467 | 0.37060758 |
| sp P40763-3 STAT3_HUMAN | -0.1558456 | 1.0485198  |
| sp Q27J81-2 INF2_HUMAN  | -0.1553707 | 0.2178309  |
| sp P61923 COPZ1_HUMAN   | -0.1549311 | 0.19149946 |
| sp O75436 VP26A_HUMAN   | -0.1545162 | 0.56808305 |
| sp P20073-2 ANXA7_HUMAN | -0.1540241 | 0.93112767 |
| sp P55735-2 SEC13_HUMAN | -0.1534157 | 0.5111962  |
| sp O43615 TIM44_HUMAN   | -0.1523752 | 0.19149946 |
| sp O43865 SAHH2_HUMAN   | -0.1506205 | 0.35795313 |
| sp Q8NHV1 GIMA7_HUMAN   | -0.1504784 | 0.7827403  |
| sp P43686 PRS6B_HUMAN   | -0.1501875 | 1.0242546  |
| sp O94973-2 AP2A2_HUMAN | -0.1492653 | 0.37128913 |
| sp O75937 DNJC8_HUMAN   | -0.1462212 | 0.40256184 |
| sp P46108 CRK_HUMAN     | -0.1459999 | 0.6509351  |
| sp Q16787-3 LAMA3_HUMAN | -0.1459293 | 0.656254   |
| sp P48643 TCPE_HUMAN    | -0.1439438 | 0.80320555 |
| sp P26196 DDX6_HUMAN    | -0.1436501 | 0.09894868 |
| sp P09496-2 CLCA_HUMAN  | -0.1425285 | 0.21439649 |
| sp P67775 PP2AA_HUMAN   | -0.1415978 | 0          |
| sp Q93052 LPP_HUMAN     | -0.1409588 | 1.0604883  |
| sp P13987-2 CD59_HUMAN  | -0.1405716 | 0.5204253  |
| sp Q8TAT6-2 NPL4_HUMAN  | -0.1399822 | 0.40256184 |
| sp Q14108 SCRB2_HUMAN   | -0.1385899 | 1.1932944  |
| sp Q13363-2 CTBP1_HUMAN | -0.1383572 | 0.19149946 |
| sp P58107 EPIPL_HUMAN   | -0.1379566 | 0.6115017  |
| sp P50914 RL14_HUMAN    | -0.1379089 | 0.2178309  |
| sp P42224-2 STAT1_HUMAN | -0.1377792 | 0.33495146 |
| sp P42704 LPPRC_HUMAN   | -0.1377487 | 0.90036625 |
| sp P49903-2 SPS1_HUMAN  | -0.1369476 | 0.2178309  |
| sp O75396 SC22B_HUMAN   | -0.1362915 | 0.6509351  |
| sp P26885 FKBP2_HUMAN   | -0.1360378 | 0          |
| sp Q99460 PSMD1_HUMAN   | -0.1359406 | 0.3761346  |
| sp P23528 COF1_HUMAN    | -0.1356468 | 1.1470993  |
| sp Q6DKJ4 NXN_HUMAN     | -0.1350031 | 0.19149946 |
| sp P49720 PSB3_HUMAN    | -0.1346817 | 0.95332193 |
| sp P05165-2 PCCA_HUMAN  | -0.1340275 | 1.0604883  |
| sp O95571 ETHE1_HUMAN   | -0.1319809 | 0.56808305 |
| sp O75347 TBCA_HUMAN    | -0.1307278 | 0.09894868 |
| sp Q14515-2 SPRL1_HUMAN | -0.1291733 | 0.45033538 |
| sp Q9BX97 PLVAP_HUMAN   | -0.1290817 | 0.45033538 |

|                         |            |            |
|-------------------------|------------|------------|
| sp P09493-5 TPM1_HUMAN  | -0.1288967 | 0.7827403  |
| sp Q9UJZ1-2 STML2_HUMAN | -0.1284008 | 0.7061832  |
| sp P32456 GBP2_HUMAN    | -0.1273136 | 0.45033538 |
| sp P61970 NTF2_HUMAN    | -0.1254654 | 0.5204253  |
| sp P22234-2 PUR6_HUMAN  | -0.1253624 | 0.70235044 |
| sp Q14980-2 NUMA1_HUMAN | -0.1249523 | 1.145722   |
| sp Q53T59 H1BP3_HUMAN   | -0.1249332 | 0.7827403  |
| sp P84085 ARF5_HUMAN    | -0.1247597 | 0.656254   |
| sp Q96EP5-2 DAZP1_HUMAN | -0.1242733 | 0.19149946 |
| sp Q13561-2 DCTN2_HUMAN | -0.1223984 | 0.59872687 |
| sp P29692-2 EF1D_HUMAN  | -0.1218185 | 1.1505735  |
| sp P01911 2B1F_HUMAN    | -0.1213837 | 0.45033538 |
| sp P46459 NSF_HUMAN     | -0.1211662 | 0.1342476  |
| sp O15296 LX15B_HUMAN   | -0.1211433 | 0.1342476  |
| sp Q96FN4 CPNE2_HUMAN   | -0.12006   | 0          |
| sp P61204 ARF3_HUMAN    | -0.1195717 | 0.4075265  |
| sp Q9NY33 DPP3_HUMAN    | -0.1185131 | 0.46530083 |
| sp Q9HCN8 SDF2L_HUMAN   | -0.1183548 | 0.19149946 |
| sp P26639-2 SYTC_HUMAN  | -0.1179199 | 0.56639653 |
| sp P09543-2 CN37_HUMAN  | -0.116684  | 0.06842031 |
| sp Q16527 CSR2_HUMAN    | -0.1164074 | 0.5204253  |
| sp P06748-2 NPM_HUMAN   | -0.115427  | 0.35795313 |
| sp P18669 PGAM1_HUMAN   | -0.1154194 | 0.51708394 |
| sp P14618 KPYM_HUMAN    | -0.1154079 | 0.04454162 |
| sp P08865 RSSA_HUMAN    | -0.115345  | 0.7827403  |
| sp Q969H8 MYDGF_HUMAN   | -0.1151009 | 0.2178309  |
| sp Q13630 FCL_HUMAN     | -0.1141396 | 0.45033538 |
| sp P39656-3 OST48_HUMAN | -0.113615  | 0.86708647 |
| sp Q15293 RCN1_HUMAN    | -0.1131287 | 0.95332193 |
| sp P07814 SYEP_HUMAN    | -0.1127634 | 0.5283125  |
| sp Q9P1F3 ABRAL_HUMAN   | -0.1125431 | 0          |
| sp Q96CX2 KCD12_HUMAN   | -0.1117992 | 0.3731982  |
| sp P15529-10 MCP_HUMAN  | -0.1113529 | 0          |
| sp P46779-2 RL28_HUMAN  | -0.1111259 | 0.40256184 |
| sp Q15008-4 PSMD6_HUMAN | -0.1101151 | 0          |
| sp Q92542 NICA_HUMAN    | -0.1096077 | 0.7061832  |
| sp Q10567-2 AP1B1_HUMAN | -0.1086044 | 0.5204253  |
| sp P20674 COX5A_HUMAN   | -0.1080666 | 0.09894868 |
| sp P32455 GBP1_HUMAN    | -0.1073017 | 1.120602   |
| sp Q13596-2 SNX1_HUMAN  | -0.1067677 | 0          |
| sp Q8TD19 NEK9_HUMAN    | -0.1044712 | 0.45033538 |
| sp P16278-2 BGAL_HUMAN  | -0.1041126 | 0.7498006  |
| sp P26640 SYVC_HUMAN    | -0.1040306 | 0.2207585  |
| sp Q96CN7 ISOC1_HUMAN   | -0.1039429 | 0.33495146 |
| sp P27694 RFA1_HUMAN    | -0.1033993 | 0.26737198 |

|                         |            |            |
|-------------------------|------------|------------|
| sp P05166-2 PCCB_HUMAN  | -0.1033669 | 0.6115017  |
| sp Q15746-2 MYLK_HUMAN  | -0.1031418 | 0.27907842 |
| sp P58546 MTPN_HUMAN    | -0.1027699 | 0.35795313 |
| sp P49588-2 SYAC_HUMAN  | -0.0989838 | 0.525685   |
| sp P51636-2 CAV2_HUMAN  | -0.0988159 | 0.19149946 |
| sp P09429 HMGB1_HUMAN   | -0.0987396 | 0.19149946 |
| sp Q9GZM7-3 TINAL_HUMAN | -0.098424  | 0          |
| sp Q02818 NUCB1_HUMAN   | -0.0956516 | 0.5360584  |
| sp A0FGR8-2 ESYT2_HUMAN | -0.0949879 | 0.5111962  |
| sp Q9UNZ2-5 NSF1C_HUMAN | -0.0949154 | 0.43103603 |
| sp P62633-3 CNBP_HUMAN  | -0.0948505 | 0          |
| sp Q92499 DDX1_HUMAN    | -0.0943861 | 0.57986265 |
| sp P15144 AMPN_HUMAN    | -0.0937691 | 0.51870745 |
| sp P09382 LEG1_HUMAN    | -0.0930729 | 0.56639653 |
| sp Q7KZF4 SND1_HUMAN    | -0.0929852 | 0.312067   |
| sp Q9UBQ5 EIF3K_HUMAN   | -0.0928574 | 0          |
| sp O95861-4 BPNT1_HUMAN | -0.0925903 | 0.5111962  |
| sp Q9BUT1 BDH2_HUMAN    | -0.0923557 | 0.6115017  |
| sp O00264 PGRC1_HUMAN   | -0.0922871 | 0.70235044 |
| sp P17174 AATC_HUMAN    | -0.092104  | 0.37410614 |
| sp Q9Y4L1 HYOU1_HUMAN   | -0.0918198 | 0.5681111  |
| sp P30519 HMOX2_HUMAN   | -0.0907717 | 0.19149946 |
| sp P41091 IF2G_HUMAN    | -0.0905476 | 0.04454162 |
| sp O60763-2 USO1_HUMAN  | -0.0896759 | 0.01343579 |
| sp P62913-2 RL11_HUMAN  | -0.08951   | 0          |
| sp Q9Y230 RUVB2_HUMAN   | -0.0894756 | 0.01044662 |
| sp P33316 DUT_HUMAN     | -0.088604  | 1.1932944  |
| sp O60547-2 GMDS_HUMAN  | -0.0884628 | 0.35795313 |
| sp P37108 SRP14_HUMAN   | -0.0879316 | 0.19149946 |
| sp P78371 TCPB_HUMAN    | -0.0874977 | 0.2711284  |
| sp P31689-2 DNJA1_HUMAN | -0.0870171 | 0.19149946 |
| sp P54652 HSP72_HUMAN   | -0.0865955 | 0          |
| sp Q9Y678 COPG1_HUMAN   | -0.0861607 | 0.5474665  |
| sp Q9UEY8 ADDG_HUMAN    | -0.0855942 | 1.0918401  |
| sp P48449-3 ERG7_HUMAN  | -0.0848427 | 0.5111962  |
| sp Q15149-9 PLEC_HUMAN  | -0.0848236 | 0.656254   |
| sp Q9UHL4 DPP2_HUMAN    | -0.084816  | 0.74639726 |
| sp Q9NQG5 RPR1B_HUMAN   | -0.0833244 | 0.35795313 |
| sp Q08431 MFGM_HUMAN    | -0.0817394 | 0.35795313 |
| sp O95466-2 FMNL1_HUMAN | -0.0803299 | 1.1932944  |
| sp Q99439 CNN2_HUMAN    | -0.0796528 | 0.02174174 |
| sp Q709C8-3 VP13C_HUMAN | -0.0784817 | 0.17171621 |
| sp Q92629-3 SGCD_HUMAN  | -0.0781059 | 0.40256184 |
| sp P13928 ANXA8_HUMAN   | -0.0780411 | 0          |
| sp Q9NRV9 HEBP1_HUMAN   | -0.0774002 | 0.40256184 |

|                         |            |            |
|-------------------------|------------|------------|
| sp P22102 PUR2_HUMAN    | -0.0757637 | 0.21439649 |
| sp O00571-2 DDX3X_HUMAN | -0.0747204 | 0.7061832  |
| sp Q04323-2 UBXN1_HUMAN | -0.0740185 | 0          |
| sp P60981 DEST_HUMAN    | -0.0735512 | 0.09339783 |
| sp Q99436 PSB7_HUMAN    | -0.0731058 | 0.19149946 |
| sp P35579-2 MYH9_HUMAN  | -0.0725164 | 0.656254   |
| sp B5ME19 EIFCL_HUMAN   | -0.0724373 | 0.2178309  |
| sp P01112 RASH_HUMAN    | -0.0722866 | 0          |
| sp O94804 STK10_HUMAN   | -0.0721092 | 0.19149946 |
| sp Q9P2E9 RRBP1_HUMAN   | -0.0715218 | 1.2731345  |
| sp P02794 FRIH_HUMAN    | -0.0707245 | 0.26737198 |
| sp P45974-2 UBP5_HUMAN  | -0.0693283 | 0.26295313 |
| sp P50135 HNMT_HUMAN    | -0.0691433 | 0          |
| sp P61020 RAB5B_HUMAN   | -0.0676289 | 0.2178309  |
| sp Q92556 ELMO1_HUMAN   | -0.067193  | 0.21439649 |
| sp P23588 IF4B_HUMAN    | -0.0668793 | 0.21439649 |
| sp Q8WX93-5 PALLD_HUMAN | -0.0664921 | 0.2178309  |
| sp O75489 NDUS3_HUMAN   | -0.0651407 | 0.30372584 |
| sp P08238 HS90B_HUMAN   | -0.0645485 | 0.34244674 |
| sp P31939 PUR9_HUMAN    | -0.063983  | 0.13973783 |
| sp Q9UHX1-6 PUF60_HUMAN | -0.0637913 | 0.2178309  |
| sp P30044-2 PRDX5_HUMAN | -0.0636978 | 0.656254   |
| sp P49821-2 NDUV1_HUMAN | -0.0631838 | 0.06953826 |
| sp Q9Y6W5 WASF2_HUMAN   | -0.062624  | 0.5204253  |
| sp P04844 RPN2_HUMAN    | -0.0624676 | 0.70235044 |
| sp Q93084-2 AT2A3_HUMAN | -0.0624199 | 0.45033538 |
| sp P14868 SYDC_HUMAN    | -0.060606  | 0.85807747 |
| sp O95336 6PGL_HUMAN    | -0.0596199 | 0.02174174 |
| sp P09972 ALDOC_HUMAN   | -0.0576382 | 0.26737198 |
| sp P09619 PGFRB_HUMAN   | -0.0574245 | 0.09894868 |
| sp Q92688-2 AN32B_HUMAN | -0.0572701 | 0.35795313 |
| sp P46977 STT3A_HUMAN   | -0.0568333 | 0.45033538 |
| sp P25325-2 THTM_HUMAN  | -0.0567694 | 0.25789237 |
| sp P54920 SNAA_HUMAN    | -0.0561543 | 0.6255959  |
| sp Q7L576 CYFP1_HUMAN   | -0.0541325 | 0.19149946 |
| sp Q15942 ZYX_HUMAN     | -0.0523491 | 0.09339783 |
| sp P41250 GARS_HUMAN    | -0.0522776 | 0.4668234  |
| sp Q6UW68 TM205_HUMAN   | -0.051693  | 0.45033538 |
| sp P62081 RS7_HUMAN     | -0.0510235 | 0.7061832  |
| sp O43681 ASNA_HUMAN    | -0.0503845 | 0.2178309  |
| sp Q9HCB6 SPON1_HUMAN   | -0.0499268 | 0          |
| sp Q3LXA3 TKFC_HUMAN    | -0.0498981 | 0.1318641  |
| sp O60313-10 OPA1_HUMAN | -0.0487309 | 0.19149946 |
| sp P00387-3 NB5R3_HUMAN | -0.0478554 | 0.3005443  |
| sp P61026 RAB10_HUMAN   | -0.0476408 | 0.19149946 |

|                         |            |            |
|-------------------------|------------|------------|
| sp O95394-3 AGM1_HUMAN  | -0.0471401 | 0          |
| sp P08631-2 HCK_HUMAN   | -0.0470819 | 0          |
| sp Q9BT78 CSN4_HUMAN    | -0.0470467 | 0.06291623 |
| sp P27105 STOM_HUMAN    | -0.045784  | 0.1804695  |
| sp O75306-2 NDUS2_HUMAN | -0.0451946 | 0.06291623 |
| sp P35611-2 ADDA_HUMAN  | -0.0446072 | 0.02174174 |
| sp Q99873-3 ANM1_HUMAN  | -0.0425453 | 0.14672586 |
| sp P46783 RS10_HUMAN    | -0.0418558 | 0.19149946 |
| sp P84098 RL19_HUMAN    | -0.0417519 | 0          |
| sp Q8NCW5 NNRE_HUMAN    | -0.0415916 | 0.21439649 |
| sp P39019 RS19_HUMAN    | -0.0409985 | 0.2178309  |
| sp P21291 CSRP1_HUMAN   | -0.0409431 | 0.39705694 |
| sp Q13724-2 MOGS_HUMAN  | -0.0402584 | 0.8339169  |
| sp Q9UBC2-2 EP15R_HUMAN | -0.0401592 | 0          |
| sp P62195 PRS8_HUMAN    | -0.0387783 | 0          |
| sp Q12797-10 ASPH_HUMAN | -0.0371933 | 0.16702904 |
| sp Q9NR45 SIAS_HUMAN    | -0.0368538 | 0.31741163 |
| sp O43488 ARK72_HUMAN   | -0.036293  | 0.06291623 |
| sp P25787 PSA2_HUMAN    | -0.0352135 | 0.2207585  |
| sp P23497 SP100_HUMAN   | -0.0345612 | 0.45033538 |
| sp Q15075 EEA1_HUMAN    | -0.0339527 | 0.18700324 |
| sp P53618 COPB_HUMAN    | -0.0339432 | 0.0426314  |
| sp Q7Z4W1 DCXR_HUMAN    | -0.0333366 | 0.45563722 |
| sp O75915 PRAF3_HUMAN   | -0.0333157 | 0.35795313 |
| sp Q06210-2 GFPT1_HUMAN | -0.0301228 | 0.26737198 |
| sp P08571 CD14_HUMAN    | -0.0298405 | 0.1342476  |
| sp P55010 IF5_HUMAN     | -0.0288944 | 0          |
| sp O14980 XPO1_HUMAN    | -0.0277443 | 0.09894868 |
| sp Q14141-2 SEPT6_HUMAN | -0.0274506 | 0.656254   |
| sp O00170 AIP_HUMAN     | -0.0270004 | 0.5111962  |
| sp Q9NUQ9 FA49B_HUMAN   | -0.0263767 | 0          |
| sp P48147 PPCE_HUMAN    | -0.0256748 | 0.14927356 |
| sp Q16630-2 CPSF6_HUMAN | -0.0254631 | 0.09894868 |
| sp Q92598-2 HS105_HUMAN | -0.0246983 | 0          |
| sp P62304 RUXE_HUMAN    | -0.0236645 | 0.19149946 |
| sp Q9BZZ5-5 API5_HUMAN  | -0.0234489 | 0.09339783 |
| sp P17980 PRS6A_HUMAN   | -0.0230465 | 0.09339783 |
| sp P12270 TPR_HUMAN     | -0.0229683 | 0.2718748  |
| sp P12110 CO6A2_HUMAN   | -0.0210533 | 0.01189081 |
| sp P15090 FABP4_HUMAN   | -0.0208626 | 0.29066643 |
| sp Q15819 UB2V2_HUMAN   | -0.0195999 | 0          |
| sp Q8WXX5 DNJC9_HUMAN   | -0.0188141 | 0.19149946 |
| sp P30512 1A29_HUMAN    | -0.0186005 | 0.35795313 |
| sp Q9BUF5 TBB6_HUMAN    | -0.018384  | 0.40256184 |
| sp Q13885 TBB2A_HUMAN   | -0.0169811 | 0.19149946 |

|                          |            |            |
|--------------------------|------------|------------|
| sp P00441 SODC_HUMAN     | -0.0163536 | 0.26737198 |
| sp O75503 CLN5_HUMAN     | -0.0159435 | 0.09894868 |
| sp P52758 RIDA_HUMAN     | -0.0158463 | 0          |
| sp O43852-3 CALU_HUMAN   | -0.0129547 | 0          |
| sp P14550 AK1A1_HUMAN    | -0.0099106 | 0.03857618 |
| sp Q8N392 RHG18_HUMAN    | -0.0085945 | 0.2178309  |
| sp P34932 HSP74_HUMAN    | -0.008049  | 0.20037685 |
| sp P55060-3 XPO2_HUMAN   | -0.0077572 | 0.37060758 |
| sp Q14204 DYHC1_HUMAN    | -0.0038185 | 0.34157792 |
| sp Q8N163-2 CCAR2_HUMAN  | -0.0036983 | 0          |
| sp P27487 DPP4_HUMAN     | -0.0012398 | 0.21439649 |
| sp P67936 TPM4_HUMAN     | -7.00E-04  | 0.15980355 |
| sp P78417-2 GSTO1_HUMAN  | -4.50E-04  | 0          |
| sp P35908 K22E_HUMAN     | -3.24E-05  | 0.03956581 |
| sp P55795 HNRH2_HUMAN    | 2.86E-05   | 0.17319627 |
| sp Q16775-2 GLO2_HUMAN   | 9.63E-04   | 0.09894868 |
| sp Q07812-7 BAX_HUMAN    | 0.0013504  | 0          |
| sp Q9BTV4 TMM43_HUMAN    | 0.00180435 | 0.20467198 |
| sp P51665 PSMD7_HUMAN    | 0.00189972 | 0.19149946 |
| sp P21810 PGS1_HUMAN     | 0.00282288 | 0.29919147 |
| sp Q86VP6 CAND1_HUMAN    | 0.00309181 | 0.12540545 |
| sp Q13464 ROCK1_HUMAN    | 0.00310135 | 0          |
| sp Q13526 PIN1_HUMAN     | 0.00333595 | 0.19149946 |
| sp P49257 LMAN1_HUMAN    | 0.00388527 | 0.23973103 |
| sp O60716-14 CTND1_HUMAN | 0.00398064 | 0.09894868 |
| sp Q16134-3 ETFD_HUMAN   | 0.00635815 | 0          |
| sp P18583-10 SON_HUMAN   | 0.00715256 | 0          |
| sp O60884 DNJA2_HUMAN    | 0.00748825 | 0.1342476  |
| sp Q9UJU6-2 DBNL_HUMAN   | 0.00782013 | 0          |
| sp P00338 LDHA_HUMAN     | 0.00788879 | 0.09157685 |
| sp P28074 PSB5_HUMAN     | 0.00802422 | 0.14672586 |
| sp O43396 TXNL1_HUMAN    | 0.00848961 | 0.19149946 |
| sp P67809 YBOX1_HUMAN    | 0.01111794 | 0.45033538 |
| sp O14787-2 TNPO2_HUMAN  | 0.01132202 | 0          |
| sp P12277 KCRB_HUMAN     | 0.01162148 | 0.02347357 |
| sp Q9UBG0 MRC2_HUMAN     | 0.01188374 | 0.3630891  |
| sp Q8WVM8 SCFD1_HUMAN    | 0.01241493 | 0.17511293 |
| sp Q9NP79 VTA1_HUMAN     | 0.01251602 | 0.09894868 |
| sp P52888 THOP1_HUMAN    | 0.0138607  | 0.19149946 |
| sp P09104-2 ENOG_HUMAN   | 0.0144043  | 0.29066643 |
| sp P36776-3 LONM_HUMAN   | 0.0157938  | 0.09339783 |
| sp Q6UVK1 CSPG4_HUMAN    | 0.01695252 | 0.14672586 |
| sp P05387 RLA2_HUMAN     | 0.01774979 | 0.19149946 |
| sp Q9UNS2 CSN3_HUMAN     | 0.01825714 | 0.656254   |
| sp Q93034 CUL5_HUMAN     | 0.01905823 | 0          |



|                          |            |            |
|--------------------------|------------|------------|
| sp P14174 MIF_HUMAN      | 0.01927948 | 0.2178309  |
| sp Q14651 PLSI_HUMAN     | 0.01940918 | 0          |
| sp P12109 CO6A1_HUMAN    | 0.01964569 | 0.03984664 |
| sp Q96HE7 ERO1A_HUMAN    | 0.02066422 | 0.2178309  |
| sp Q15124 PGM5_HUMAN     | 0.02070236 | 0.2220352  |
| sp O14579 COPE_HUMAN     | 0.02210808 | 0.04454162 |
| sp Q6XQN6-2 PNCB_HUMAN   | 0.02308846 | 0.31741163 |
| sp O15498-2 YKT6_HUMAN   | 0.02447701 | 0          |
| sp P18428 LBP_HUMAN      | 0.02462006 | 0          |
| sp P30046 DOPD_HUMAN     | 0.02571487 | 0          |
| sp Q9Y3A5 SBDS_HUMAN     | 0.02589035 | 0.11949348 |
| sp Q5EBM0 CMPK2_HUMAN    | 0.02669907 | 0.35795313 |
| sp P49755 TMEDA_HUMAN    | 0.0267477  | 0.1342476  |
| sp Q9UBT2 SAE2_HUMAN     | 0.0273056  | 0.30372584 |
| sp Q12792-3 TWF1_HUMAN   | 0.02772141 | 0          |
| sp Q9BVK6 TMED9_HUMAN    | 0.02832413 | 0          |
| sp Q08380 LG3BP_HUMAN    | 0.0297966  | 0.37061578 |
| sp Q15257-2 PTPA_HUMAN   | 0.0301609  | 0.09339783 |
| sp P27918 PROP_HUMAN     | 0.03129387 | 0          |
| sp P15880 RS2_HUMAN      | 0.03166962 | 0.1342476  |
| sp P80303-2 NUCB2_HUMAN  | 0.03265381 | 0.35193655 |
| sp Q9NQW7-3 XPP1_HUMAN   | 0.03285599 | 0.17171621 |
| sp Q92747 ARC1A_HUMAN    | 0.03653336 | 0          |
| sp Q16401-2 PSMD5_HUMAN  | 0.03747177 | 0.17511293 |
| sp P25685-2 DNJB1_HUMAN  | 0.03782845 | 0.19149946 |
| sp Q9Y5K5-2 UCHL5_HUMAN  | 0.03815079 | 0          |
| sp Q12765 SCRN1_HUMAN    | 0.03853226 | 0.40256184 |
| sp Q13243-3 SRSF5_HUMAN  | 0.03871918 | 0          |
| sp P12814 ACTN1_HUMAN    | 0.03941536 | 0          |
| sp O00487 PSDE_HUMAN     | 0.03975296 | 0.19149946 |
| sp O43294 TGFI1_HUMAN    | 0.0405159  | 0.19149946 |
| sp Q15691 MARE1_HUMAN    | 0.04193211 | 0.26737198 |
| sp P20591 MX1_HUMAN      | 0.04377556 | 0          |
| sp P13798 ACPH_HUMAN     | 0.04426575 | 0.368128   |
| sp O00151 PDLI1_HUMAN    | 0.0443058  | 0.29781067 |
| sp O43175 SERA_HUMAN     | 0.04465866 | 0.7220187  |
| sp P54578-3 UBP14_HUMAN  | 0.04481506 | 0.21439649 |
| sp Q93009-3 UBP7_HUMAN   | 0.04609299 | 0          |
| sp P02750 A2GL_HUMAN     | 0.04667282 | 0.01653191 |
| sp Q9Y224 RTRAF_HUMAN    | 0.04802704 | 0.14672586 |
| sp Q9NZ32 ARP10_HUMAN    | 0.05029678 | 0.7827403  |
| sp P30533 AMRP_HUMAN     | 0.05116272 | 0.26737198 |
| sp P62333 PRS10_HUMAN    | 0.05125237 | 0.06842031 |
| sp P31321 KAP1_HUMAN     | 0.05453682 | 0          |
| sp O94979-10 SC31A_HUMAN | 0.05490303 | 0.04707252 |

|                         |            |            |
|-------------------------|------------|------------|
| sp P12111-2 CO6A3_HUMAN | 0.05517578 | 0.1500082  |
| sp Q96M27-3 PRRC1_HUMAN | 0.05553055 | 0.19149946 |
| sp P04275 VWF_HUMAN     | 0.05575752 | 0.97661924 |
| sp Q9UI12-2 VATH_HUMAN  | 0.05659676 | 0.26737198 |
| sp P21589-2 5NTD_HUMAN  | 0.05721474 | 0          |
| sp P04792 HSPB1_HUMAN   | 0.05777931 | 1.0586762  |
| sp P04040 CATA_HUMAN    | 0.05855942 | 1.0524595  |
| sp Q9NTK5 OLA1_HUMAN    | 0.05897236 | 0.19149946 |
| sp O60506-3 HNRPQ_HUMAN | 0.05900478 | 0.7588735  |
| sp P61201-2 CSN2_HUMAN  | 0.05902672 | 0.19149946 |
| sp P50148 GNAQ_HUMAN    | 0.05976677 | 0.6298893  |
| sp Q86VS8 HOOK3_HUMAN   | 0.05986786 | 0.45033538 |
| sp Q9NZK5 ADA2_HUMAN    | 0.06057739 | 0.45033538 |
| sp Q9Y265 RUVB1_HUMAN   | 0.06059074 | 0.42646354 |
| sp P52306-4 GDS1_HUMAN  | 0.06123352 | 0.09894868 |
| sp Q15404 RSU1_HUMAN    | 0.06371689 | 0.656254   |
| sp Q9P2X0-2 DPM3_HUMAN  | 0.06537056 | 0          |
| sp P35580-3 MYH10_HUMAN | 0.06591034 | 0.55290085 |
| sp P00568 KAD1_HUMAN    | 0.06592369 | 0.7284051  |
| sp P62070-4 RRAS2_HUMAN | 0.06636047 | 0.656254   |
| sp P57737-4 CORO7_HUMAN | 0.06642056 | 0.19149946 |
| sp P56134-3 ATPK_HUMAN  | 0.06839371 | 0          |
| sp Q92930 RAB8B_HUMAN   | 0.06845856 | 0.656254   |
| sp P18084 ITB5_HUMAN    | 0.06905174 | 0          |
| sp P06756-3 ITAV_HUMAN  | 0.06916237 | 0.7498006  |
| sp Q15417 CNN3_HUMAN    | 0.07099724 | 0.7061832  |
| sp Q9BS40 LXN_HUMAN     | 0.07287788 | 0.1342476  |
| sp P55145 MANF_HUMAN    | 0.07406616 | 0          |
| sp P46821 MAP1B_HUMAN   | 0.07590866 | 0.45563722 |
| sp P53602 MVD1_HUMAN    | 0.07735252 | 0.5204253  |
| sp P04406 G3P_HUMAN     | 0.08153534 | 0          |
| sp P02511 CRYAB_HUMAN   | 0.08383179 | 0.35795313 |
| sp P00492 HPRT_HUMAN    | 0.08453751 | 1.2095301  |
| sp Q9GZT8 NIF3L_HUMAN   | 0.08526135 | 0.19149946 |
| sp Q8TBC4-2 UBA3_HUMAN  | 0.08779526 | 0.45033538 |
| sp Q9BWD1 THIC_HUMAN    | 0.08916473 | 0.19149946 |
| sp P35637-2 FUS_HUMAN   | 0.0908823  | 0          |
| sp Q16774 KGUA_HUMAN    | 0.09288788 | 0          |
| sp Q14112-2 NID2_HUMAN  | 0.09632111 | 0.76289684 |
| sp Q92900-2 RENT1_HUMAN | 0.09783363 | 0.16649151 |
| sp Q8IU7 AEBP1_HUMAN    | 0.09789276 | 0.29066643 |
| sp Q9NY15 STAB1_HUMAN   | 0.09963226 | 0.19149946 |
| sp P61018-2 RAB4B_HUMAN | 0.10134602 | 0.656254   |
| sp Q6PCB0 VWA1_HUMAN    | 0.10329628 | 0.2178309  |
| sp O94855-2 SC24D_HUMAN | 0.1058712  | 0.19149946 |

|                         |            |            |
|-------------------------|------------|------------|
| sp P18085 ARF4_HUMAN    | 0.1075058  | 0.656254   |
| sp P49721 PSB2_HUMAN    | 0.10857964 | 0.19149946 |
| sp Q14847 LASP1_HUMAN   | 0.10955811 | 0.2591514  |
| sp Q9H008 LHPP_HUMAN    | 0.11166763 | 0.19410844 |
| sp P13645 K1C10_HUMAN   | 0.11439514 | 0.9357687  |
| sp Q9GZP4-2 PITH1_HUMAN | 0.11668396 | 0.19149946 |
| sp O00233-2 PSMD9_HUMAN | 0.11686897 | 0.19149946 |
| sp P98082-2 DAB2_HUMAN  | 0.1192379  | 0.19149946 |
| sp P22392-2 NDKB_HUMAN  | 0.11961556 | 1.1791906  |
| sp P51692 STA5B_HUMAN   | 0.12194252 | 1.1932944  |
| sp Q12882 DPYD_HUMAN    | 0.12417793 | 0.19149946 |
| sp P30466 1B18_HUMAN    | 0.12433243 | 0.656254   |
| sp O75368 SH3L1_HUMAN   | 0.12571144 | 0.5204253  |
| sp P62857 RS28_HUMAN    | 0.12592316 | 0.2178309  |
| sp Q9BRR6-2 ADPGK_HUMAN | 0.12743759 | 0.45033538 |
| sp Q15436 SC23A_HUMAN   | 0.12750435 | 0.5111962  |
| sp Q9C0C2 TB182_HUMAN   | 0.12765121 | 0.48520416 |
| sp Q16643-3 DREB_HUMAN  | 0.12899399 | 0.06291623 |
| sp P27695 APEX1_HUMAN   | 0.1294384  | 0          |
| sp P30837 AL1B1_HUMAN   | 0.13170242 | 0.33495146 |
| sp Q03519 TAP2_HUMAN    | 0.1342659  | 0.656254   |
| sp P08237-3 PFKAM_HUMAN | 0.13575554 | 0.95332193 |
| sp P56537 IF6_HUMAN     | 0.13582802 | 0.7498006  |
| sp O60256-3 KPRB_HUMAN  | 0.13649368 | 0.7827403  |
| sp Q13310-2 PABP4_HUMAN | 0.13698196 | 0.656254   |
| sp Q5K4L6 S27A3_HUMAN   | 0.13990021 | 0.7061832  |
| sp P42285 MTREX_HUMAN   | 0.14125156 | 0.19149946 |
| sp P43243 MATR3_HUMAN   | 0.14200783 | 0.04454162 |
| sp Q13867 BLMH_HUMAN    | 0.14506531 | 0.45033538 |
| sp P39059 COFA1_HUMAN   | 0.14800644 | 1.0485198  |
| sp P54577 SYYC_HUMAN    | 0.14897346 | 0.35795313 |
| sp O00429-6 DNM1L_HUMAN | 0.15422821 | 0.1500082  |
| sp O60664-4 PLIN3_HUMAN | 0.15435028 | 0.56808305 |
| sp O75533 SF3B1_HUMAN   | 0.15912628 | 0.19149946 |
| sp Q15437 SC23B_HUMAN   | 0.1604414  | 0.656254   |
| sp Q9P2B2 FPRP_HUMAN    | 0.16052818 | 1.0801278  |
| sp Q9Y281 COF2_HUMAN    | 0.1607151  | 1.1505735  |
| sp P15374 UCLH3_HUMAN   | 0.16147232 | 1.1276597  |
| sp P05388 RLA0_HUMAN    | 0.17217064 | 0.2178309  |
| sp Q9UJS0-2 CMC2_HUMAN  | 0.17376709 | 0          |
| sp Q07960 RHG01_HUMAN   | 0.1738739  | 1.0076748  |
| sp P35858-2 ALS_HUMAN   | 0.17431068 | 0.19149946 |
| sp O94776 MTA2_HUMAN    | 0.17557907 | 0.6298893  |
| sp P14618-2 KPYM_HUMAN  | 0.17583656 | 0.5204253  |
| sp P00740 FA9_HUMAN     | 0.1769085  | 0.312067   |

|                         |            |            |
|-------------------------|------------|------------|
| sp Q5JRX3-3 PREP_HUMAN  | 0.18254471 | 0          |
| sp Q86WV6 STING_HUMAN   | 0.18442345 | 0.7061832  |
| sp P61803 DAD1_HUMAN    | 0.18490219 | 0.656254   |
| sp P53992 SC24C_HUMAN   | 0.18556213 | 0.40256184 |
| sp O76074-2 PDE5A_HUMAN | 0.18687248 | 0.7061832  |
| sp O15061 SYNEM_HUMAN   | 0.18734169 | 0.7498006  |
| sp Q9C0E8-4 LNP_HUMAN   | 0.18767262 | 1.1932944  |
| sp Q5TZA2 CROCC_HUMAN   | 0.19128036 | 0.8983557  |
| sp Q7L5N1 CSN6_HUMAN    | 0.19210339 | 1.1932944  |
| sp P08708 RS17_HUMAN    | 0.19241714 | 1.120602   |
| sp P60891 PRPS1_HUMAN   | 0.19440079 | 0.656254   |
| sp P01034 CYTC_HUMAN    | 0.19847488 | 1.1932944  |
| sp P21399 ACOC_HUMAN    | 0.19892883 | 1.0645995  |
| sp P20039 2B1B_HUMAN    | 0.20091724 | 0.656254   |
| sp P50579-2 MAP2_HUMAN  | 0.20149422 | 0          |
| sp Q14767 LTBP2_HUMAN   | 0.20227432 | 0.95482355 |
| sp Q96HY6 DDR GK_HUMAN  | 0.20481491 | 0.656254   |
| sp P0DJ18 SAA1_HUMAN    | 0.20571136 | 0          |
| sp Q96P70 IPO9_HUMAN    | 0.2070179  | 0.21439649 |
| sp P06753-6 TPM3_HUMAN  | 0.21187401 | 0.656254   |
| sp P20810-4 ICAL_HUMAN  | 0.21310043 | 0.91601294 |
| sp O75323 NIPS2_HUMAN   | 0.21816444 | 0.45033538 |
| sp O00391 QSOX1_HUMAN   | 0.22060204 | 0          |
| sp P62829 RL23_HUMAN    | 0.2319336  | 0.7827403  |
| sp O95479 G6PE_HUMAN    | 0.23674202 | 0.7588735  |
| sp O60610-2 DIAP1_HUMAN | 0.23854828 | 1.0485198  |
| sp Q15661 TRYB1_HUMAN   | 0.24377632 | 1.0475321  |
| sp P24666 PPAC_HUMAN    | 0.24435616 | 0.19149946 |
| sp P30613-2 KPYR_HUMAN  | 0.24459457 | 0.656254   |
| sp Q96HC4 PDLI5_HUMAN   | 0.2450962  | 0.656254   |
| sp Q5R3I4 TTC38_HUMAN   | 0.24586487 | 0          |
| sp P04062-2 GLCM_HUMAN  | 0.24596214 | 0.6070219  |
| sp Q66K74-2 MAP1S_HUMAN | 0.25109863 | 1.1932944  |
| sp P36542 ATPG_HUMAN    | 0.25956917 | 0.656254   |
| sp Q9Y5Z4 HEBP2_HUMAN   | 0.26172066 | 0.2178309  |
| sp O75746-2 CMC1_HUMAN  | 0.26558304 | 0.7061832  |
| sp P62191-2 PRS4_HUMAN  | 0.27272987 | 0.35795313 |
| sp P42785-2 PCP_HUMAN   | 0.27282715 | 1.2773042  |
| sp Q9BZE9-2 ASPC1_HUMAN | 0.2786274  | 0.656254   |
| sp Q9UNH7-2 SNX6_HUMAN  | 0.28132915 | 0.45033538 |
| sp Q99538-2 LGMN_HUMAN  | 0.28157043 | 0.19149946 |
| sp Q08379 GOGA2_HUMAN   | 0.28295898 | 0.19149946 |
| sp P16144-2 ITB4_HUMAN  | 0.2965479  | 0.7827403  |
| sp Q99598 TSNAX_HUMAN   | 0.29809475 | 0.7061832  |
| sp P54802 ANAG_HUMAN    | 0.3036642  | 0.19149946 |

|                           |            |            |
|---------------------------|------------|------------|
| sp P01743 HV146_HUMAN     | 0.310503   | 0.656254   |
| sp P08779 K1C16_HUMAN     | 0.3129387  | 0.7827403  |
| sp P62269 RS18_HUMAN      | 0.31328583 | 0.6298893  |
| sp P11678 PERE_HUMAN      | 0.31446838 | 0.91601294 |
| sp Q08378 GOGA3_HUMAN     | 0.31825352 | 0.91601294 |
| sp Q7Z4H8 PLGT3_HUMAN     | 0.32453346 | 0.656254   |
| sp Q00341-2 VIGLN_HUMAN   | 0.32650375 | 1.2432404  |
| sp P35080-2 PROF2_HUMAN   | 0.32922935 | 0.656254   |
| sp P09012 SNRPA_HUMAN     | 0.3337078  | 0.19149946 |
| sp P62736 ACTA_HUMAN      | 0.33613014 | 0.656254   |
| sp P63027 VAMP2_HUMAN     | 0.34398842 | 1.1932944  |
| sp P02533 K1C14_HUMAN     | 0.3593397  | 0.45033538 |
| sp Q96HN2-2 SAHH3_HUMAN   | 0.36075783 | 0.656254   |
| sp P34896-2 GLYC_HUMAN    | 0.37167645 | 0.656254   |
| sp Q9UK22 FBX2_HUMAN      | 0.38382435 | 1.1932944  |
| sp P07951-3 TPM2_HUMAN    | 0.38465118 | 0.7588735  |
| sp P0CG38 POTEI_HUMAN     | 0.38873768 | 0.656254   |
| sp P63267 ACTH_HUMAN      | 0.3948784  | 0.656254   |
| sp O60825-2 F262_HUMAN    | 0.40759277 | 0.656254   |
| sp Q687X5 STEA4_HUMAN     | 0.4255829  | 0.7827403  |
| sp O14791-2 APOL1_HUMAN   | 0.42950058 | 1.1932944  |
| sp Q05682 CALD1_HUMAN     | 0.4320774  | 0.5204253  |
| sp P0DOX3 IGD_HUMAN       | 0.43770218 | 0.656254   |
| sp P05452 TETN_HUMAN      | 0.45760918 | 0.7061832  |
| sp P40261 NNMT_HUMAN      | 0.46194172 | 1.1505735  |
| sp A0A0C4DH31 HV118_HUMAN | 0.47339058 | 0.656254   |
| sp Q9H6S3 ES8L2_HUMAN     | 0.48140907 | 0.7827403  |
| sp P12814-2 ACTN1_HUMAN   | 0.48213577 | 1.1932944  |
| sp P07358 CO8B_HUMAN      | 0.4863882  | 0.8983557  |
| sp Q92599-3 SEPT8_HUMAN   | 0.49816895 | 1.1932944  |
| sp O95302-3 FKBP9_HUMAN   | 0.50089264 | 1.1932944  |
| sp P40123-2 CAP2_HUMAN    | 0.5144787  | 0.656254   |
| sp P20339-2 RAB5A_HUMAN   | 0.5168266  | 0.656254   |
| sp P69891 HBG1_HUMAN      | 0.5176201  | 0.656254   |
| sp P14207 FOLR2_HUMAN     | 0.52077866 | 0.656254   |
| sp Q9NSK0-5 KLC4_HUMAN    | 0.5327072  | 0.656254   |
| sp Q7Z7G0 TARSH_HUMAN     | 0.536993   | 1.1932944  |
| sp O94788-3 AL1A2_HUMAN   | 0.54286957 | 0.656254   |
| sp Q99961-3 SH3G1_HUMAN   | 0.54821014 | 0.656254   |
| sp O43301 HS12A_HUMAN     | 0.5489216  | 1.0485198  |
| sp Q8TCD5 NT5C_HUMAN      | 0.5606575  | 1.1932944  |
| sp P07360 CO8G_HUMAN      | 0.5797806  | 1.1932944  |
| sp Q04695 K1C17_HUMAN     | 0.58003616 | 0.656254   |
| sp P23142-4 FBLN1_HUMAN   | 0.5899782  | 0.656254   |
| sp Q06033-2 ITIH3_HUMAN   | 0.59802246 | 0.7827403  |

|                           |            |            |
|---------------------------|------------|------------|
| sp P28161 GSTM2_HUMAN     | 0.63067245 | 0.656254   |
| sp P19404 NDUV2_HUMAN     | 0.6472397  | 0.19149946 |
| sp A0A0C4DH29 HV103_HUMAN | 0.6519718  | 0.656254   |
| sp P12111-4 CO6A3_HUMAN   | 0.65527153 | 0.656254   |
| sp O75964 ATP5L_HUMAN     | 0.65802383 | 1.1932944  |
| sp Q13976-2 KGP1_HUMAN    | 0.7385731  | 0.656254   |
| sp P47895 AL1A3_HUMAN     | 0.7514458  | 0.656254   |
| sp P09871 C1S_HUMAN       | 0.75982666 | 0.5204253  |
| sp P01591 IGJ_HUMAN       | 0.77490425 | 1.1932944  |
| sp Q9BTE3-2 MCMBP_HUMAN   | 0.77521515 | 0.45033538 |
| sp A0A0C4DH38 HV551_HUMAN | 0.77970123 | 1.1932944  |
| sp Q06828 FMOD_HUMAN      | 0.7826252  | 1.1932944  |
| sp P08185 CBG_HUMAN       | 0.8255844  | 1.1932944  |
| sp P02461 CO3A1_HUMAN     | 0.8493881  | 1.1932944  |
| sp Q04446 GLGB_HUMAN      | 0.8618021  | 0.25789237 |
| sp O76011 KRT34_HUMAN     | 0.8685894  | 0.656254   |
| sp P55058 PLTP_HUMAN      | 0.8787508  | 1.1932944  |
| sp P02751-15 FINC_HUMAN   | 0.8891201  | 0.656254   |
| sp P01860 IGHG3_HUMAN     | 0.89302826 | 1.3006523  |
| sp A0A0B4J1X8 HV343_HUMAN | 0.8977623  | 0.656254   |
| sp P01619 KV320_HUMAN     | 1.010294   | 0.656254   |
| sp P23083 HV102_HUMAN     | 1.0324707  | 0.656254   |
| sp Q96AY3 FKB10_HUMAN     | 1.0562553  | 1.1932944  |
| sp P05155-2 IC1_HUMAN     | 1.0744972  | 1.1932944  |
| sp Q15063-3 POSTN_HUMAN   | 1.0897789  | 1.1932944  |
| sp Q15063-2 POSTN_HUMAN   | 1.1104622  | 0.656254   |
| sp P35542 SAA4_HUMAN      | 1.1216011  | 1.1932944  |
| sp P02763 A1AG1_HUMAN     | 1.1613846  | 1.2773042  |
| sp Q15046 SYK_HUMAN       | 1.185154   | 0.656254   |
| sp P0COL4 CO4A_HUMAN      | 1.1941061  | 1.1932944  |
| sp P02747 C1QC_HUMAN      | 1.2514343  | 1.1932944  |
| sp O94919 ENDD1_HUMAN     | 1.3012028  | 0          |
| sp P11166 GTR1_HUMAN      | 1.3800373  | 1.1932944  |
| sp P01782 HV309_HUMAN     | 1.3998756  | 0.656254   |
| sp P0COL5 CO4B_HUMAN      | 1.4002514  | 1.1932944  |
| sp P48741 HSP77_HUMAN     | 1.4329243  | 0.656254   |
| sp P01624 KV315_HUMAN     | 1.4354477  | 1.1932944  |
| sp P02746 C1QB_HUMAN      | 1.5147228  | 1.1932944  |
| sp A0A0C4DH25 KVD20_HUMAN | 1.6677189  | 0.656254   |
| sp P01834 IGKC_HUMAN      | 1.7494774  | 1.1932944  |
| sp P01780 HV307_HUMAN     | 1.7503128  | 0.656254   |
| sp PODP03 HV335_HUMAN     | 1.7626495  | 1.1932944  |
| sp P69892 HBG2_HUMAN      | 1.7663689  | 0.656254   |
| sp P00738 HPT_HUMAN       | 1.9446831  | 0.656254   |
| sp P06310 KV230_HUMAN     | 1.9644623  | 0.656254   |

|                           |           |           |
|---------------------------|-----------|-----------|
| sp Q03591 FHR1_HUMAN      | 2.2304182 | 1.1932944 |
| sp A0A0C4DH41 HV461_HUMAN | 2.3162384 | 0.656254  |
| sp A0A075B6P5 KV228_HUMAN | 2.5711517 | 0.656254  |
| sp O43790 KRT86_HUMAN     | 3.32802   | 0.656254  |
| sp Q15323 K1H1_HUMAN      | 3.9766417 | 0.656254  |
