# Supplementary material for: Peptidylarginine deiminase 2 citrullinates MZB1 and promotes the secretion of IgM and IgA
Source: PubMed Central journal article supplement (PMC10716219; doi:10.3389/fimmu.2023.1290585), 2023-11-29
Supplement: DataSheet_10.pdf [file DataSheet_10.pdf]

## Supplemental Table 10: COPD1 vs controls

| Accession #              | Fold Change | p value (-log10) |
|--------------------------|-------------|------------------|
| sp P62805 H4_HUMAN       | -0.645504   | 5.226002         |
| sp P84243 H33_HUMAN      | -0.5726891  | 1.6960104        |
| sp P22748 CAH4_HUMAN     | -0.2734909  | 1.5646582        |
| sp P02788 TRFL_HUMAN     | -0.1877365  | 2.2798014        |
| sp P08311 CATG_HUMAN     | 0.19815445  | 1.3635377        |
| sp P05107 ITB2_HUMAN     | 0.2017746   | 1.4068714        |
| sp P10412 H14_HUMAN      | 0.21715736  | 1.6092666        |
| sp P02768 ALBU_HUMAN     | 0.21965408  | 7.8594766        |
| sp POCG47 UBB_HUMAN      | 0.23016167  | 2.151766         |
| sp P05362 ICAM1_HUMAN    | 0.24691391  | 1.4832523        |
| sp Q16629-4 SRSF7_HUMAN  | 0.25896835  | 2.1818786        |
| sp P01903 DRA_HUMAN      | 0.2614441   | 1.9509854        |
| sp Q07157 ZO1_HUMAN      | 0.2658329   | 3.4304368        |
| sp Q9Y624 JAM1_HUMAN     | 0.26625824  | 2.6997027        |
| sp Q8NBQ5 DHB11_HUMAN    | 0.26987457  | 3.1266599        |
| sp P51149 RAB7A_HUMAN    | 0.27315903  | 1.9153107        |
| sp P11215-2 ITAM_HUMAN   | 0.2759266   | 1.3635377        |
| sp P42167-2 LAP2B_HUMAN  | 0.28160286  | 2.3047035        |
| sp Q15102 PA1B3_HUMAN    | 0.29572868  | 2.1818786        |
| sp P11233 RALA_HUMAN     | 0.29699707  | 1.4104178        |
| sp Q07955-2 SRSF1_HUMAN  | 0.3065014   | 4.220149         |
| sp P13647 K2C5_HUMAN     | 0.30781174  | 4.7039127        |
| sp Q9BVC6 TM109_HUMAN    | 0.3122921   | 1.6960104        |
| sp Q15907 RB11B_HUMAN    | 0.31320572  | 2.653196         |
| sp P09467 F16P1_HUMAN    | 0.3175106   | 1.9311212        |
| sp P01009 A1AT_HUMAN     | 0.32048607  | 3.3967228        |
| sp Q6NZI2 CAVN1_HUMAN    | 0.3204956   | 4.9172535        |
| sp P39019 RS19_HUMAN     | 0.32600212  | 1.6960104        |
| sp P51572-2 BAP31_HUMAN  | 0.33575058  | 1.4278674        |
| sp P05026-2 AT1B1_HUMAN  | 0.33698273  | 1.8444856        |
| sp P19013 K2C4_HUMAN     | 0.338459    | 2.4829872        |
| sp P07686 HEXB_HUMAN     | 0.34049225  | 3.2221727        |
| sp Q9UGT4 SUSD2_HUMAN    | 0.3407421   | 2.6997027        |
| sp Q03135 CAV1_HUMAN     | 0.3433628   | 1.3815327        |
| sp P26006-1 ITA3_HUMAN   | 0.3437538   | 3.0824287        |
| sp Q9H0U4 RAB1B_HUMAN    | 0.3440838   | 1.9647322        |
| sp P61106 RAB14_HUMAN    | 0.35243034  | 4.367871         |
| sp O75367-2 H2AY_HUMAN   | 0.35640144  | 3.4656596        |
| sp P10606 COX5B_HUMAN    | 0.35805893  | 1.7590232        |
| sp P02671-2 FIBA_HUMAN   | 0.35974884  | 3.3699222        |
| sp P08575-10 PTPRC_HUMAN | 0.36309242  | 2.2613342        |
| sp P20700 LMNB1_HUMAN    | 0.36699104  | 14.14841         |
| sp P24539 AT5F1_HUMAN    | 0.36839676  | 1.9997257        |

|                         |            |           |
|-------------------------|------------|-----------|
| sp P06753-2 TPM3_HUMAN  | 0.3707962  | 2.7060583 |
| sp O75955-2 FLOT1_HUMAN | 0.3750782  | 2.4829872 |
| sp Q02818 NUCB1_HUMAN   | 0.37739372 | 2.7192829 |
| sp P05783 K1C18_HUMAN   | 0.3789425  | 5.7283993 |
| sp P49407-2 ARRB1_HUMAN | 0.3814621  | 1.5567774 |
| sp P01011 AACT_HUMAN    | 0.38251495 | 9.004438  |
| sp P30740 ILEU_HUMAN    | 0.3827362  | 3.1822758 |
| sp P04179-4 SODM_HUMAN  | 0.383873   | 2.6576471 |
| sp Q14498-2 RBM39_HUMAN | 0.38721275 | 1.5646582 |
| sp P16284-3 PECA1_HUMAN | 0.3881588  | 5.5660806 |
| sp Q9H299 SH3L3_HUMAN   | 0.38983536 | 1.4104178 |
| sp P07996 TSP1_HUMAN    | 0.39102554 | 2.6576471 |
| sp P0DP25 CALM3_HUMAN   | 0.39130783 | 2.7472508 |
| sp Q96AG4 LRC59_HUMAN   | 0.39413452 | 2.6576471 |
| sp Q9H223 EHD4_HUMAN    | 0.39499664 | 2.6514559 |
| sp Q02543 RL18A_HUMAN   | 0.39587593 | 2.6576471 |
| sp P29218 IMPA1_HUMAN   | 0.39597702 | 1.7713763 |
| sp P59998 ARPC4_HUMAN   | 0.39669037 | 1.9951487 |
| sp P61019 RAB2A_HUMAN   | 0.40132523 | 1.6960104 |
| sp P22307-8 NLTP_HUMAN  | 0.40190887 | 3.1266599 |
| sp P30048-2 PRDX3_HUMAN | 0.40324402 | 2.3143692 |
| sp Q9NX63 MIC19_HUMAN   | 0.40501785 | 2.6576471 |
| sp Q96C19 EFHD2_HUMAN   | 0.40690613 | 1.9647322 |
| sp P62269 RS18_HUMAN    | 0.40931702 | 2.1818786 |
| sp P27105 STOM_HUMAN    | 0.41056824 | 3.364204  |
| sp Q9HDC9 APMAP_HUMAN   | 0.41270447 | 4.789934  |
| sp P22626 ROA2_HUMAN    | 0.41283226 | 6.044454  |
| sp P13646-3 K1C13_HUMAN | 0.41877937 | 1.8444856 |
| sp P13073 COX41_HUMAN   | 0.42206383 | 1.9647322 |
| sp P31942-2 HNRH3_HUMAN | 0.42249107 | 2.3143692 |
| sp P00491 PNPH_HUMAN    | 0.423357   | 3.417183  |
| sp Q9UDY2-3 ZO2_HUMAN   | 0.4244423  | 2.6554532 |
| sp P13804-2 ETFA_HUMAN  | 0.42605972 | 2.6134143 |
| sp Q99715-4 COCA1_HUMAN | 0.4288864  | 1.6604291 |
| sp Q9H3N1 TMX1_HUMAN    | 0.43113136 | 1.4104178 |
| sp Q8NF37 PCAT1_HUMAN   | 0.4355812  | 1.827201  |
| sp P48735 IDHP_HUMAN    | 0.4360218  | 4.12427   |
| sp P04080 CYTB_HUMAN    | 0.43782043 | 1.6960104 |
| sp O14745 NHRF1_HUMAN   | 0.43815613 | 1.3561004 |
| sp P21399 ACOC_HUMAN    | 0.4389534  | 1.7713763 |
| sp Q9NP72-2 RAB18_HUMAN | 0.44081497 | 2.1818786 |
| sp Q13740-2 CD166_HUMAN | 0.44129944 | 3.5838592 |
| sp P30040 ERP29_HUMAN   | 0.44153976 | 2.0727112 |
| sp P07305 H10_HUMAN     | 0.44421387 | 1.6960104 |
| sp Q99623 PHB2_HUMAN    | 0.44445038 | 4.044672  |

|                         |            |           |
|-------------------------|------------|-----------|
| sp P30050 RL12_HUMAN    | 0.4455185  | 2.6576471 |
| sp P84095 RHOG_HUMAN    | 0.44740105 | 1.6960104 |
| sp P35908 K22E_HUMAN    | 0.44848633 | 8.558914  |
| sp P02545 LMNA_HUMAN    | 0.44997597 | 3.658668  |
| sp P21796 VDAC1_HUMAN   | 0.4502697  | 5.161142  |
| sp Q86Y82 STX12_HUMAN   | 0.45149803 | 2.6576471 |
| sp Q96AE4-2 FUBP1_HUMAN | 0.45379066 | 3.2221727 |
| sp Q92542 NICA_HUMAN    | 0.4543724  | 1.6960104 |
| sp Q5TZA2 CROCC_HUMAN   | 0.4543743  | 1.8444856 |
| sp Q16698-2 DECR_HUMAN  | 0.45641708 | 4.964395  |
| sp P46781 RS9_HUMAN     | 0.45705414 | 3.5908275 |
| sp P40429 RL13A_HUMAN   | 0.45931244 | 1.6960104 |
| sp O15400-2 STX7_HUMAN  | 0.46050835 | 2.1818786 |
| sp P80303-2 NUCB2_HUMAN | 0.46074677 | 2.1818786 |
| sp Q8WXF1 PSPC1_HUMAN   | 0.4615326  | 1.6092666 |
| sp Q969H8 MYDGF_HUMAN   | 0.4620266  | 1.6960104 |
| sp P23246 SFPQ_HUMAN    | 0.46251488 | 5.161142  |
| sp P31146 COR1A_HUMAN   | 0.46338272 | 3.97461   |
| sp P35527 K1C9_HUMAN    | 0.46556282 | 4.964395  |
| sp P58107 EPIPL_HUMAN   | 0.46571732 | 3.760603  |
| sp P43652 AFAM_HUMAN    | 0.46614456 | 4.876761  |
| sp P23396 RS3_HUMAN     | 0.4665718  | 5.869831  |
| sp P01871-2 IGHM_HUMAN  | 0.46715546 | 1.7590232 |
| sp P62136 PP1A_HUMAN    | 0.46803665 | 1.6960104 |
| sp P51648-2 AL3A2_HUMAN | 0.47057724 | 4.051346  |
| sp P69905 HBA_HUMAN     | 0.47094345 | 3.5908275 |
| sp P09601 HMOX1_HUMAN   | 0.4717865  | 1.6960104 |
| sp P02766 TTHY_HUMAN    | 0.4724083  | 2.1818786 |
| sp O75947-2 ATP5H_HUMAN | 0.4737358  | 2.6576471 |
| sp P62424 RL7A_HUMAN    | 0.4750023  | 4.126053  |
| sp P21397 AOFA_HUMAN    | 0.47767258 | 4.953735  |
| sp Q13185 CBX3_HUMAN    | 0.47772217 | 1.6960104 |
| sp P02649 APOE_HUMAN    | 0.47821426 | 5.407453  |
| sp Q15181 IPYR_HUMAN    | 0.4782524  | 1.6960104 |
| sp Q13308-6 PTK7_HUMAN  | 0.47880936 | 3.5908275 |
| sp P09525 ANXA4_HUMAN   | 0.47963905 | 3.5924494 |
| sp P62081 RS7_HUMAN     | 0.4798584  | 1.6960104 |
| sp O00264 PGRC1_HUMAN   | 0.4799137  | 2.6576471 |
| sp P56537 IF6_HUMAN     | 0.48107147 | 2.1818786 |
| sp P43304 GPDM_HUMAN    | 0.4813366  | 4.051346  |
| sp O75937 DNJC8_HUMAN   | 0.48171806 | 1.5646582 |
| sp Q02978 M2OM_HUMAN    | 0.4822216  | 3.1266599 |
| sp P23284 PPIB_HUMAN    | 0.48491096 | 4.509013  |
| sp P50914 RL14_HUMAN    | 0.4849968  | 1.6960104 |
| sp P22695 QCR2_HUMAN    | 0.48695946 | 4.051346  |

|                         |            |           |
|-------------------------|------------|-----------|
| sp Q00765 REEP5_HUMAN   | 0.48721695 | 1.515701  |
| sp P35754 GLRX1_HUMAN   | 0.48804855 | 2.1818786 |
| sp Q9P0L0-2 VAPA_HUMAN  | 0.48815155 | 2.8845065 |
| sp P15880 RS2_HUMAN     | 0.48837662 | 3.1266599 |
| sp Q14103-3 HNRPD_HUMA  | 0.48908806 | 4.575238  |
| sp P11310-2 ACADM_HUMA  | 0.4895172  | 4.7039127 |
| sp Q9Y277-2 VDAC3_HUMAI | 0.4902954  | 2.6576471 |
| sp P39656-3 OST48_HUMAN | 0.4912758  | 3.5908275 |
| sp P37837 TALDO_HUMAN   | 0.4914627  | 5.074809  |
| sp P62993 GRB2_HUMAN    | 0.4917946  | 2.1818786 |
| sp P18124 RL7_HUMAN     | 0.4922428  | 3.5908275 |
| sp Q12907 LMAN2_HUMAN   | 0.4936638  | 3.1266599 |
| sp P09110 THIK_HUMAN    | 0.49400902 | 3.5908275 |
| sp P35241 RADI_HUMAN    | 0.49432182 | 3.0251918 |
| sp P02549-2 SPTA1_HUMAN | 0.49489594 | 7.5025163 |
| sp Q9UHB6-4 LIMA1_HUMA  | 0.49534416 | 1.9951487 |
| sp P02730 B3AT_HUMAN    | 0.49563217 | 4.285869  |
| sp P09874 PARP1_HUMAN   | 0.4957199  | 3.5908275 |
| sp P62316 SMD2_HUMAN    | 0.49572372 | 1.9647322 |
| sp Q9Y6N5 SQOR_HUMAN    | 0.49684715 | 4.2046685 |
| sp Q92817 EVPL_HUMAN    | 0.49723053 | 4.281241  |
| sp P10599-2 THIO_HUMAN  | 0.4973259  | 1.7590232 |
| sp P07237 PDIA1_HUMAN   | 0.4990883  | 11.579804 |
| sp P55268 LAMB2_HUMAN   | 0.49936104 | 12.717298 |
| sp P62906 RL10A_HUMAN   | 0.4996109  | 3.1266599 |
| sp P62820 RAB1A_HUMAN   | 0.5011997  | 2.6576471 |
| sp Q9H4M9 EHD1_HUMAN    | 0.50185776 | 3.218121  |
| sp B5ME19 EIFCL_HUMAN   | 0.5020237  | 2.5461748 |
| sp Q14344 GNA13_HUMAN   | 0.50219345 | 2.1818786 |
| sp P00492 HPRT_HUMAN    | 0.5024586  | 2.1818786 |
| sp P52272-2 HNRPM_HUMA  | 0.5027504  | 7.7524443 |
| sp Q9UL25 RAB21_HUMAN   | 0.50395584 | 1.9647322 |
| sp Q13636 RAB31_HUMAN   | 0.5043316  | 1.6960104 |
| sp Q8NBJ5 GT251_HUMAN   | 0.5044956  | 1.6960104 |
| sp P43490 NAMPT_HUMAN   | 0.50460434 | 6.3204336 |
| sp O96009 NAPSA_HUMAN   | 0.50478745 | 2.6576471 |
| sp P0DOX8 IGL1_HUMAN    | 0.50506973 | 2.6576471 |
| sp P27797 CALR_HUMAN    | 0.5057144  | 4.509013  |
| sp P29350-4 PTN6_HUMAN  | 0.5063534  | 1.8838416 |
| sp P01861 IGHG4_HUMAN   | 0.507246   | 2.4829872 |
| sp Q15293 RCN1_HUMAN    | 0.5095215  | 1.6960104 |
| sp P38919 IF4A3_HUMAN   | 0.5095272  | 4.051346  |
| sp P26373 RL13_HUMAN    | 0.5105858  | 2.151766  |
| sp P61353 RL27_HUMAN    | 0.51122284 | 1.6960104 |
| sp Q15365 PCBP1_HUMAN   | 0.5112686  | 2.8739974 |

|                         |            |           |
|-------------------------|------------|-----------|
| sp P35232 PHB_HUMAN     | 0.51138306 | 5.417897  |
| sp P60953 CDC42_HUMAN   | 0.5119724  | 3.7273152 |
| sp P11047 LAMC1_HUMAN   | 0.51264954 | 8.931878  |
| sp Q9NNW7 TRXR2_HUMAN   | 0.5126629  | 2.1818786 |
| sp E9PAV3 NACAM_HUMAN   | 0.5128212  | 2.1818786 |
| sp Q9Y230 RUVB2_HUMAN   | 0.5131397  | 2.894491  |
| sp P10253 LYAG_HUMAN    | 0.51372147 | 3.5908275 |
| sp O75396 SC22B_HUMAN   | 0.5138855  | 3.1266599 |
| sp P50213 IDH3A_HUMAN   | 0.51390266 | 1.6960104 |
| sp Q9C0C2-2 TB182_HUMAN | 0.5139675  | 2.1818786 |
| sp P36543-2 VATE1_HUMAN | 0.51405525 | 1.6960104 |
| sp P02774-3 VTDB_HUMAN  | 0.51499176 | 8.558914  |
| sp Q00325-2 MPCP_HUMAN  | 0.5162716  | 1.9951487 |
| sp O95571 ETHE1_HUMAN   | 0.5177746  | 2.36833   |
| sp O60437 PEPL_HUMAN    | 0.5184536  | 14.539617 |
| sp Q05655-2 KPCD_HUMAN  | 0.5193424  | 1.4104178 |
| sp Q969V3-2 NCLN_HUMAN  | 0.5204296  | 2.1818786 |
| sp P04264 K2C1_HUMAN    | 0.5206814  | 12.996504 |
| sp Q14254 FLOT2_HUMAN   | 0.5214653  | 4.509013  |
| sp P26599-2 PTBP1_HUMAN | 0.5219536  | 2.6576471 |
| sp Q6YHK3-4 CD109_HUMAN | 0.52228165 | 1.6960104 |
| sp P48047 ATPO_HUMAN    | 0.5226078  | 3.9417877 |
| sp Q9P258 RCC2_HUMAN    | 0.5232601  | 2.6576471 |
| sp Q9UBS4 DJB11_HUMAN   | 0.5242386  | 1.6960104 |
| sp P02042 HBD_HUMAN     | 0.52505875 | 3.5908275 |
| sp P16278-2 BGAL_HUMAN  | 0.525177   | 1.4104178 |
| sp P10809 CH60_HUMAN    | 0.52575684 | 9.952936  |
| sp Q6P587-3 FAHD1_HUMAN | 0.52591133 | 1.6960104 |
| sp Q8WUY1 THEM6_HUMAN   | 0.52706146 | 1.6960104 |
| sp P30533 AMRP_HUMAN    | 0.528738   | 1.6960104 |
| sp Q13162 PRDX4_HUMAN   | 0.52876663 | 3.1266599 |
| sp Q03252 LMNB2_HUMAN   | 0.52978134 | 14.55665  |
| sp P61981 1433G_HUMAN   | 0.53035927 | 4.051346  |
| sp Q96TA1-2 NIBL1_HUMAN | 0.53053856 | 2.9807727 |
| sp Q9UKV3-5 ACINU_HUMAN | 0.5315323  | 2.1818786 |
| sp Q7Z406-2 MYH14_HUMAN | 0.5325165  | 11.224656 |
| sp O96000-2 NDUBA_HUMAN | 0.5328407  | 1.6960104 |
| sp Q9BS40 LXN_HUMAN     | 0.5329399  | 1.4104178 |
| sp Q92882 OSTF1_HUMAN   | 0.53307533 | 1.3815327 |
| sp O15230 LAMA5_HUMAN   | 0.53336334 | 5.417897  |
| sp Q8WU39 MZB1_HUMAN    | 0.5344353  | 1.6960104 |
| sp Q9BS26 ERP44_HUMAN   | 0.53549576 | 3.1266599 |
| sp P19338 NUCL_HUMAN    | 0.5358162  | 9.004438  |
| sp P28066 PSA5_HUMAN    | 0.53593826 | 1.6960104 |
| sp P35268 RL22_HUMAN    | 0.5359745  | 1.5646582 |

|                         |            |           |
|-------------------------|------------|-----------|
| sp P26038 MOES_HUMAN    | 0.53599167 | 10.066691 |
| sp P14618-3 KP YM_HUMAN | 0.5360184  | 2.6576471 |
| sp Q9UFN0 NPS3A_HUMAN   | 0.5360851  | 1.6960104 |
| sp O75489 NDUS3_HUMAN   | 0.53658295 | 1.6960104 |
| sp P05388-2 RLAO_HUMAN  | 0.538023   | 3.5908275 |
| sp Q9NTK5 OLA1_HUMAN    | 0.538126   | 2.1818786 |
| sp P25398 RS12_HUMAN    | 0.539732   | 4.051346  |
| sp P04196 HRG_HUMAN     | 0.5399437  | 3.5908275 |
| sp P09871 C1S_HUMAN     | 0.5399895  | 2.1818786 |
| sp Q5SSJ5-2 HP1B3_HUMAN | 0.54011536 | 3.5908275 |
| sp P40926 MDHM_HUMAN    | 0.54146004 | 8.413603  |
| sp Q96RQ3 MCCA_HUMAN    | 0.5419979  | 2.1818786 |
| sp P51649-2 SSDH_HUMAN  | 0.5423889  | 2.1818786 |
| sp P51148-2 RAB5C_HUMAN | 0.5438843  | 1.8444856 |
| sp P61978-3 HNRPK_HUMAN | 0.5449772  | 7.3098264 |
| sp O00231-2 PSD11_HUMAN | 0.54504204 | 3.1266599 |
| sp P61421 VA0D1_HUMAN   | 0.5454807  | 3.1266599 |
| sp Q9UHG3 PCYOX_HUMAN   | 0.5455227  | 5.869831  |
| sp Q14165 MLEC_HUMAN    | 0.5462818  | 1.6960104 |
| sp O15511 ARPC5_HUMAN   | 0.5465431  | 1.4716977 |
| sp P31040 SDHA_HUMAN    | 0.54849243 | 4.509013  |
| sp P06733 ENOA_HUMAN    | 0.5488663  | 8.815352  |
| sp P02675 FIBB_HUMAN    | 0.5492821  | 6.57528   |
| sp P19971 TYPH_HUMAN    | 0.5493641  | 8.061325  |
| sp P09497-2 CLCB_HUMAN  | 0.5496559  | 1.6960104 |
| sp P22392-2 NDKB_HUMAN  | 0.550333   | 4.509013  |
| sp Q8N392 RHG18_HUMAN   | 0.5506935  | 1.9951487 |
| sp P52597 HNRPF_HUMAN   | 0.5507927  | 2.6576471 |
| sp Q13148 TADBP_HUMAN   | 0.550869   | 1.6960104 |
| sp P05141 ADT2_HUMAN    | 0.5509529  | 2.6576471 |
| sp P52566 GDIR2_HUMAN   | 0.5520115  | 2.3388627 |
| sp Q14112-2 NID2_HUMAN  | 0.55205154 | 3.5908275 |
| sp P04004 VTNC_HUMAN    | 0.5523243  | 4.051346  |
| sp Q06323 PSME1_HUMAN   | 0.5526562  | 2.7472508 |
| sp Q9BTZ2 DHRS4_HUMAN   | 0.55366135 | 1.6960104 |
| sp P46782 RS5_HUMAN     | 0.55391693 | 3.1266599 |
| sp P42765 THIM_HUMAN    | 0.55431366 | 8.112776  |
| sp P48449-3 ERG7_HUMAN  | 0.5545769  | 2.6576471 |
| sp P63244 RACK1_HUMAN   | 0.55495834 | 4.126053  |
| sp P17844-2 DDX5_HUMAN  | 0.5553894  | 3.7161493 |
| sp P07203 GPX1_HUMAN    | 0.55545616 | 4.051346  |
| sp O15247 CLIC2_HUMAN   | 0.5557289  | 2.9807727 |
| sp P46777 RL5_HUMAN     | 0.55592346 | 4.797763  |
| sp Q08945 SSRP1_HUMAN   | 0.5562229  | 2.6576471 |
| sp Q86UX7-2 URP2_HUMAN  | 0.55657005 | 5.180782  |

|                         |            |           |
|-------------------------|------------|-----------|
| sp Q9HB07 MYG1_HUMAN    | 0.5576019  | 1.6960104 |
| sp Q8N1G4 LRC47_HUMAN   | 0.5576439  | 2.432837  |
| sp Q13724-2 MOGS_HUMAN  | 0.55854225 | 2.1818786 |
| sp P62266 RS23_HUMAN    | 0.5590992  | 1.6960104 |
| sp Q96HY6 DDR GK_HUMAN  | 0.559782   | 1.6604291 |
| sp P02750 A2GL_HUMAN    | 0.56027985 | 1.8444856 |
| sp Q9Y224 RTRAF_HUMAN   | 0.5606289  | 2.6576471 |
| sp P62258 1433E_HUMAN   | 0.5614548  | 8.112776  |
| sp Q15661 TRYB1_HUMAN   | 0.5614815  | 4.575238  |
| sp Q08380 LG3BP_HUMAN   | 0.5617676  | 3.5908275 |
| sp Q53GQ0 DHB12_HUMAN   | 0.56193733 | 2.6576471 |
| sp P52788 SPSY_HUMAN    | 0.56204605 | 1.6960104 |
| sp Q00796 DHSO_HUMAN    | 0.56318283 | 1.6960104 |
| sp P23528 COF1_HUMAN    | 0.5639572  | 4.789934  |
| sp Q5T440 CAF17_HUMAN   | 0.5654068  | 1.6960104 |
| sp Q13217 DNJC3_HUMAN   | 0.5654354  | 2.1818786 |
| sp P53597 SUCA_HUMAN    | 0.56622887 | 2.1818786 |
| sp Q92896-2 GSLG1_HUMAN | 0.5662842  | 1.9190748 |
| sp P99999 CYC_HUMAN     | 0.5664482  | 2.6576471 |
| sp P61160 ARP2_HUMAN    | 0.5672989  | 5.417897  |
| sp P20073-2 ANXA7_HUMAN | 0.5673485  | 4.876761  |
| sp Q9NQC3 RTN4_HUMAN    | 0.5673599  | 2.6576471 |
| sp Q9Y3D6 FIS1_HUMAN    | 0.5678234  | 1.6960104 |
| sp Q9NUV9 GIMA4_HUMAN   | 0.5681     | 2.6576471 |
| sp Q12931-2 TRAP1_HUMAN | 0.56827164 | 1.7713763 |
| sp P11277-3 SPTB1_HUMAN | 0.56983566 | 5.417897  |
| sp P06576 ATPB_HUMAN    | 0.57029724 | 9.449409  |
| sp P06748-3 NPM_HUMAN   | 0.5715256  | 1.9647322 |
| sp P49755 TMEDA_HUMAN   | 0.5720215  | 2.432837  |
| sp P26440 IVD_HUMAN     | 0.57229805 | 2.1818786 |
| sp P25705 ATPA_HUMAN    | 0.5724182  | 12.553017 |
| sp O75915 PRAF3_HUMAN   | 0.5724983  | 2.1818786 |
| sp Q9Y265 RUVB1_HUMAN   | 0.5725708  | 2.56956   |
| sp O15143 ARC1B_HUMAN   | 0.5726471  | 1.6644778 |
| sp P61586 RHOA_HUMAN    | 0.57292366 | 1.6960104 |
| sp Q02252-2 MMSA_HUMAN  | 0.57292557 | 4.4116287 |
| sp Q8IV08 PLD3_HUMAN    | 0.57328796 | 2.6576471 |
| sp P27635 RL10_HUMAN    | 0.5734062  | 1.6960104 |
| sp O00483 NDUA4_HUMAN   | 0.57421494 | 1.6960104 |
| sp P21912 SDHB_HUMAN    | 0.5747833  | 1.6960104 |
| sp P27824-2 CALX_HUMAN  | 0.5760422  | 4.876761  |
| sp P00505 AATM_HUMAN    | 0.5763359  | 5.869831  |
| sp P52907 CAZA1_HUMAN   | 0.5765114  | 3.5908275 |
| sp P01876 IGHA1_HUMAN   | 0.5766754  | 4.051346  |
| sp Q13011 ECH1_HUMAN    | 0.5771637  | 4.051346  |

|                          |            |           |
|--------------------------|------------|-----------|
| sp P41091 IF2G_HUMAN     | 0.57748795 | 2.6576471 |
| sp P13645 K1C10_HUMAN    | 0.5784073  | 9.8522625 |
| sp O75323 NIPS2_HUMAN    | 0.57853127 | 1.6960104 |
| sp P01042-2 KNG1_HUMAN   | 0.5790367  | 6.7698927 |
| sp P25685-2 DNJB1_HUMAN  | 0.5795078  | 1.6960104 |
| sp P08621-2 RU17_HUMAN   | 0.5796776  | 2.6576471 |
| sp P49257 LMAN1_HUMAN    | 0.58042717 | 2.1818786 |
| sp P60228 EIF3E_HUMAN    | 0.58052826 | 1.5646582 |
| sp O60256-3 KPRB_HUMAN   | 0.5809097  | 2.1818786 |
| sp Q6NUK1-2 SCMC1_HUMAN  | 0.58109283 | 4.051346  |
| sp P68871 HBB_HUMAN      | 0.5817814  | 4.051346  |
| sp P14868 SYDC_HUMAN     | 0.5819874  | 4.964395  |
| sp P01008 ANT3_HUMAN     | 0.5823097  | 6.7073655 |
| sp P13667 PDIA4_HUMAN    | 0.58231163 | 9.004438  |
| sp Q9BTV4 TMM43_HUMAN    | 0.5825043  | 4.051346  |
| sp P02679-2 FIBG_HUMAN   | 0.58276176 | 4.9297023 |
| sp Q9Y266 NUDC_HUMAN     | 0.5841236  | 1.6960104 |
| sp P08648 ITA5_HUMAN     | 0.5857048  | 1.6960104 |
| sp Q99714 HCD2_HUMAN     | 0.58727455 | 4.509013  |
| sp O60716-14 CTND1_HUMAN | 0.5878258  | 2.5461748 |
| sp P00367 DHE3_HUMAN     | 0.58855057 | 4.044672  |
| sp P30044 PRDX5_HUMAN    | 0.5886402  | 4.3225203 |
| sp Q9Y2S2 CRYL1_HUMAN    | 0.5890465  | 2.1818786 |
| sp Q9HCC0-2 MCCB_HUMAN   | 0.58919334 | 2.9807727 |
| sp Q9NYL9 TMOD3_HUMAN    | 0.5898762  | 2.6576471 |
| sp P06865 HEXA_HUMAN     | 0.5904026  | 2.1818786 |
| sp Q07065 CKAP4_HUMAN    | 0.59183884 | 11.15183  |
| sp P12081-4 SYHC_HUMAN   | 0.5932064  | 3.1266599 |
| sp O14828-2 SCAM3_HUMAN  | 0.59405327 | 1.6960104 |
| sp Q9NZZ2-2 OGFR_HUMAN   | 0.5945816  | 1.6960104 |
| sp O00233-2 PSMD9_HUMAN  | 0.5950451  | 1.6960104 |
| sp P36578 RL4_HUMAN      | 0.5967045  | 4.964395  |
| sp Q9H8H3 MET7A_HUMAN    | 0.5970459  | 1.6960104 |
| sp P49748-2 ACADV_HUMAN  | 0.59716606 | 12.593429 |
| sp P04899-3 GNAI2_HUMAN  | 0.59799194 | 4.4116287 |
| sp P35914 HMGCL_HUMAN    | 0.5989227  | 1.6960104 |
| sp P63241 IF5A1_HUMAN    | 0.59970474 | 2.1818786 |
| sp P09382 LEG1_HUMAN     | 0.59970856 | 4.509013  |
| sp Q9UPQ0-3 LIMC1_HUMAN  | 0.59991455 | 2.432837  |
| sp P39060-1 COIA1_HUMAN  | 0.60022926 | 4.051346  |
| sp Q9NR45 SIAS_HUMAN     | 0.6006603  | 4.051346  |
| sp P34897-3 GLYM_HUMAN   | 0.6009598  | 2.1818786 |
| sp P14314-2 GLU2B_HUMAN  | 0.6011257  | 3.5908275 |
| sp Q07812-2 BAX_HUMAN    | 0.6011734  | 2.1818786 |
| sp Q16363-2 LAMA4_HUMAN  | 0.6013851  | 4.991322  |



|                         |            |           |
|-------------------------|------------|-----------|
| sp P28072 PSB6_HUMAN    | 0.6018009  | 1.6960104 |
| sp P48444 COPD_HUMAN    | 0.6027355  | 6.253077  |
| sp P35237 SPB6_HUMAN    | 0.603281   | 7.665951  |
| sp P25786-2 PSA1_HUMAN  | 0.6035862  | 5.869831  |
| sp P07741 APT_HUMAN     | 0.6039238  | 4.051346  |
| sp P62826 RAN_HUMAN     | 0.6045246  | 2.8384566 |
| sp P04406 G3P_HUMAN     | 0.6045761  | 9.198758  |
| sp P62917 RL8_HUMAN     | 0.60471725 | 1.9190748 |
| sp P40306 PSB10_HUMAN   | 0.605072   | 1.6960104 |
| sp Q06830 PRDX1_HUMAN   | 0.6051216  | 5.7968407 |
| sp O95831-3 AIFM1_HUMAN | 0.60578346 | 5.417897  |
| sp P50148 GNAQ_HUMAN    | 0.6065388  | 2.1818786 |
| sp Q96CX2 KCD12_HUMAN   | 0.6065407  | 6.253077  |
| sp Q9UH65 SWP70_HUMAN   | 0.6072521  | 2.6576471 |
| sp P13796 PLSL_HUMAN    | 0.60726166 | 10.554664 |
| sp P50454 SERPH_HUMAN   | 0.60736847 | 3.4656596 |
| sp O00423-3 EMAL1_HUMAN | 0.60803986 | 1.6960104 |
| sp P17174 AATC_HUMAN    | 0.60811234 | 4.051346  |
| sp P33121-3 ACSL1_HUMAN | 0.6083069  | 3.1266599 |
| sp Q9UIJ7 KAD3_HUMAN    | 0.6083622  | 2.1818786 |
| sp Q9P2E9 RRBP1_HUMAN   | 0.6088295  | 12.996504 |
| sp P49961 ENTP1_HUMAN   | 0.6090355  | 2.6576471 |
| sp P62879 GBB2_HUMAN    | 0.60904694 | 2.6576471 |
| sp O75390 CISY_HUMAN    | 0.6090927  | 5.417897  |
| sp P24534 EF1B_HUMAN    | 0.6091614  | 1.6960104 |
| sp O95833 CLIC3_HUMAN   | 0.60972214 | 2.6576471 |
| sp Q15084-5 PDIA6_HUMAN | 0.60978127 | 5.417897  |
| sp Q5TDH0-3 DDI2_HUMAN  | 0.610548   | 2.1818786 |
| sp O60832-2 DKC1_HUMAN  | 0.6111107  | 1.6960104 |
| sp P60900 PSA6_HUMAN    | 0.6124325  | 1.6960104 |
| sp O75439 MPPB_HUMAN    | 0.61270905 | 1.6960104 |
| sp Q9UKK9 NUDT5_HUMAN   | 0.6128788  | 1.6960104 |
| sp P39687 AN32A_HUMAN   | 0.6132088  | 2.1818786 |
| sp P19823 ITIH2_HUMAN   | 0.6134949  | 5.869831  |
| sp Q9P2T1-2 GMPR2_HUMAN | 0.6145477  | 1.6960104 |
| sp Q06787-10 FMR1_HUMAN | 0.6149616  | 1.6960104 |
| sp P02652 APOA2_HUMAN   | 0.61579895 | 3.1266599 |
| sp Q04917 1433F_HUMAN   | 0.61706734 | 4.964395  |
| sp P50990 TCPQ_HUMAN    | 0.61714554 | 7.592264  |
| sp P23381 SYWC_HUMAN    | 0.6172848  | 7.2183566 |
| sp P49821-2 NDUV1_HUMAN | 0.61792946 | 4.051346  |
| sp P11717 MPRI_HUMAN    | 0.6182823  | 1.6960104 |
| sp Q9H0D6 XRN2_HUMAN    | 0.6186657  | 1.9647322 |
| sp P10909-5 CLUS_HUMAN  | 0.6189747  | 4.509013  |
| sp Q14624-2 ITIH4_HUMAN | 0.6196327  | 7.2183566 |

|                         |            |           |
|-------------------------|------------|-----------|
| sp P38646 GRP75_HUMAN   | 0.62060356 | 9.449409  |
| sp Q14019 COTL1_HUMAN   | 0.62073517 | 2.3047035 |
| sp Q86WV6 STING_HUMAN   | 0.6215553  | 1.6960104 |
| sp P62330 ARF6_HUMAN    | 0.62189674 | 1.6960104 |
| sp P49593 PPM1F_HUMAN   | 0.6227474  | 1.7590232 |
| sp O75306-2 NDUS2_HUMA  | 0.6231842  | 1.6960104 |
| sp P23368 MAOM_HUMAN    | 0.6239395  | 2.6576471 |
| sp O95834 EMAL2_HUMAN   | 0.62428284 | 4.051346  |
| sp O00159 MYO1C_HUMAN   | 0.6250229  | 8.804842  |
| sp P04424-2 ARLY_HUMAN  | 0.6255188  | 2.6576471 |
| sp P52565 GDIR1_HUMAN   | 0.62556267 | 3.218121  |
| sp P54727 RD23B_HUMAN   | 0.6260433  | 2.1818786 |
| sp P05091 ALDH2_HUMAN   | 0.62701225 | 11.236403 |
| sp P78417 GSTO1_HUMAN   | 0.6275425  | 4.797763  |
| sp Q08722-2 CD47_HUMAN  | 0.6277504  | 1.6960104 |
| sp P28062-2 PSB8_HUMAN  | 0.6278076  | 2.1818786 |
| sp P62191-2 PRS4_HUMAN  | 0.62786865 | 2.1818786 |
| sp O00116 ADAS_HUMAN    | 0.6279335  | 2.1818786 |
| sp P61247 RS3A_HUMAN    | 0.62903595 | 4.051346  |
| sp P15170-2 ERF3A_HUMAN | 0.629076   | 1.6960104 |
| sp Q14258 TRI25_HUMAN   | 0.62926674 | 4.509013  |
| sp P63104 1433Z_HUMAN   | 0.62960815 | 7.665951  |
| sp P61254 RL26_HUMAN    | 0.6296272  | 2.1818786 |
| sp Q9NTX5-3 ECHD1_HUMA  | 0.62979126 | 3.5908275 |
| sp P51659 DHB4_HUMAN    | 0.63007355 | 2.1818786 |
| sp Q9UNZ2-5 NSF1C_HUMA  | 0.631073   | 3.5908275 |
| sp P0DOY2 IGLC2_HUMAN   | 0.63145065 | 2.1818786 |
| sp P53634 CATC_HUMAN    | 0.63160324 | 2.1818786 |
| sp P25311 ZA2G_HUMAN    | 0.6324711  | 4.051346  |
| sp Q9H2G2-2 SLK_HUMAN   | 0.63347244 | 1.9647322 |
| sp P02790 HEMO_HUMAN    | 0.63357544 | 9.004438  |
| sp Q13838-2 DX39B_HUMA  | 0.63383484 | 3.1266599 |
| sp P10644 KAP0_HUMAN    | 0.63391876 | 4.051346  |
| sp P09211 GSTP1_HUMAN   | 0.6351738  | 5.2991114 |
| sp O43837 IDH3B_HUMAN   | 0.63518906 | 1.6960104 |
| sp P60983 GMFB_HUMAN    | 0.63550186 | 1.6960104 |
| sp P55327-3 TPD52_HUMAN | 0.63554955 | 1.6960104 |
| sp Q9UJ70-2 NAGK_HUMAN  | 0.63573074 | 2.6576471 |
| sp P62873 GBB1_HUMAN    | 0.63620186 | 3.1266599 |
| sp P50579-2 MAP2_HUMAN  | 0.63628197 | 1.6960104 |
| sp P14923 PLAK_HUMAN    | 0.6370735  | 2.6576471 |
| sp Q96AQ6-2 PBIP1_HUMAN | 0.6372051  | 2.6576471 |
| sp O00299 CLIC1_HUMAN   | 0.6372223  | 7.2183566 |
| sp Q9NZ01 TECR_HUMAN    | 0.6374035  | 2.1818786 |
| sp Q99439 CNN2_HUMAN    | 0.63760185 | 2.6576471 |

|                           |            |           |
|---------------------------|------------|-----------|
| sp P61158 ARP3_HUMAN      | 0.6376133  | 10.337908 |
| sp O43747-2 AP1G1_HUMAN   | 0.637764   | 2.1818786 |
| sp P08865 RSSA_HUMAN      | 0.6377926  | 4.964395  |
| sp P04844 RPN2_HUMAN      | 0.63783455 | 2.6576471 |
| sp P45880-2 VDAC2_HUMAN   | 0.63786316 | 5.417897  |
| sp P04003 C4BPA_HUMAN     | 0.63809204 | 4.964395  |
| sp P07942 LAMB1_HUMAN     | 0.6391678  | 5.417897  |
| sp Q9UL46 PSME2_HUMAN     | 0.63981056 | 3.5908275 |
| sp Q9NZM1-3 MYOF_HUMAN    | 0.63991547 | 8.958427  |
| sp P09622 DLDH_HUMAN      | 0.6400833  | 4.964395  |
| sp P23786 CPT2_HUMAN      | 0.6408348  | 3.5908275 |
| sp P84077 ARF1_HUMAN      | 0.64087105 | 2.1818786 |
| sp O00567 NOP56_HUMAN     | 0.64115334 | 2.1818786 |
| sp O00391 QSOX1_HUMAN     | 0.64144325 | 2.1818786 |
| sp O94905 ERLN2_HUMAN     | 0.6420803  | 1.6960104 |
| sp P00747 PLMN_HUMAN      | 0.64247704 | 6.3204336 |
| sp P29590 PML_HUMAN       | 0.6425781  | 8.112776  |
| sp P14543-2 NID1_HUMAN    | 0.64289284 | 8.720673  |
| sp Q15233 NONO_HUMAN      | 0.6430359  | 4.12427   |
| sp Q13751 LAMB3_HUMAN     | 0.64344215 | 2.1818786 |
| sp P62701 RS4X_HUMAN      | 0.64356804 | 2.1818786 |
| sp Q9UHQ9 NB5R1_HUMAN     | 0.6436291  | 2.1818786 |
| sp P11940-2 PABP1_HUMAN   | 0.6451397  | 3.5908275 |
| sp Q14152-2 EIF3A_HUMAN   | 0.6455364  | 3.1266599 |
| sp P26641 EF1G_HUMAN      | 0.6456337  | 6.3204336 |
| sp P04843 RPN1_HUMAN      | 0.646328   | 6.6106963 |
| sp P69891 HBG1_HUMAN      | 0.64655495 | 2.6576471 |
| sp P30085 KCY_HUMAN       | 0.6469841  | 1.6960104 |
| sp Q7L2H7 EIF3M_HUMAN     | 0.6472168  | 1.6960104 |
| sp P04075 ALDOA_HUMAN     | 0.64793015 | 9.893875  |
| sp O75436 VP26A_HUMAN     | 0.6487503  | 2.1818786 |
| sp O15372 EIF3H_HUMAN     | 0.64888954 | 1.6960104 |
| sp P52790 HXK3_HUMAN      | 0.64907455 | 3.1266599 |
| sp Q96TC7 RMD3_HUMAN      | 0.6493225  | 2.6576471 |
| sp P21964-2 COMT_HUMAN    | 0.6499138  | 3.760603  |
| sp P61020 RAB5B_HUMAN     | 0.650795   | 1.6960104 |
| sp O43491 E41L2_HUMAN     | 0.6512642  | 3.5190198 |
| sp P14625 ENPL_HUMAN      | 0.6512661  | 11.874758 |
| sp Q13347 EIF3I_HUMAN     | 0.65156555 | 1.6960104 |
| sp P07988 PSPB_HUMAN      | 0.6530094  | 4.367871  |
| sp A0A0B4J2D5 GAL3B_HUMAN | 0.65353394 | 2.1818786 |
| sp Q02218-2 ODO1_HUMAN    | 0.6540756  | 5.417897  |
| sp P40227 TCPZ_HUMAN      | 0.6546383  | 5.869831  |
| sp O15127 SCAM2_HUMAN     | 0.6554146  | 1.6960104 |
| sp P08758 ANXA5_HUMAN     | 0.6556225  | 11.224656 |

|                         |            |           |
|-------------------------|------------|-----------|
| sp P25787 PSA2_HUMAN    | 0.6557236  | 4.051346  |
| sp P20339-2 RAB5A_HUMAN | 0.6563511  | 1.6960104 |
| sp P61970 NTF2_HUMAN    | 0.65636826 | 1.6960104 |
| sp Q00341 VIGLN_HUMAN   | 0.6565628  | 4.051346  |
| sp P31930 QCR1_HUMAN    | 0.6567955  | 4.964395  |
| sp P20618 PSB1_HUMAN    | 0.65690804 | 3.1266599 |
| sp Q5JRX3-2 PREP_HUMAN  | 0.6571808  | 1.6960104 |
| sp P37802 TAGL2_HUMAN   | 0.65758896 | 5.5367417 |
| sp P08708 RS17_HUMAN    | 0.657959   | 2.1818786 |
| sp P25788-2 PSA3_HUMAN  | 0.6589737  | 3.1266599 |
| sp Q6NY19-2 KANK3_HUMAN | 0.65979385 | 1.6960104 |
| sp P49354 FNNTA_HUMAN   | 0.66002655 | 1.6960104 |
| sp O15382 BCAT2_HUMAN   | 0.6601906  | 2.1818786 |
| sp Q9Y5X3 SNX5_HUMAN    | 0.6604061  | 3.1266599 |
| sp O60664-4 PLIN3_HUMAN | 0.6604786  | 1.3080103 |
| sp Q9Y394-2 DHRS7_HUMAN | 0.6615429  | 2.1818786 |
| sp P47756-2 CAPZB_HUMAN | 0.6618519  | 5.7968407 |
| sp O00764-2 PDXK_HUMAN  | 0.66199017 | 3.5908275 |
| sp Q9Y315 DEOC_HUMAN    | 0.6621723  | 1.6960104 |
| sp P43243 MATR3_HUMAN   | 0.6622181  | 4.051346  |
| sp P62241 RS8_HUMAN     | 0.6623688  | 2.6576471 |
| sp P32119 PRDX2_HUMAN   | 0.66348076 | 4.964395  |
| sp Q13492-2 PICAL_HUMAN | 0.6640644  | 1.6960104 |
| sp P14618-2 KPYM_HUMAN  | 0.6647606  | 3.1266599 |
| sp P50552 VASP_HUMAN    | 0.6647606  | 4.051346  |
| sp P04217 A1BG_HUMAN    | 0.6649189  | 4.964395  |
| sp O00303 EIF3F_HUMAN   | 0.66509247 | 2.1818786 |
| sp O14786 NRP1_HUMAN    | 0.66529846 | 1.6960104 |
| sp P07737 PROF1_HUMAN   | 0.66542625 | 6.4343157 |
| sp Q99536 VAT1_HUMAN    | 0.66566086 | 4.509013  |
| sp Q12906-2 ILF3_HUMAN  | 0.66620636 | 7.2183566 |
| sp P48681 NEST_HUMAN    | 0.66698074 | 6.6106963 |
| sp O15144 ARPC2_HUMAN   | 0.6672554  | 4.509013  |
| sp O60547-2 GMDS_HUMAN  | 0.6679077  | 2.1818786 |
| sp P62913 RL11_HUMAN    | 0.6679878  | 1.6960104 |
| sp P05455 LA_HUMAN      | 0.6685009  | 4.509013  |
| sp Q9UHX1-2 PUF60_HUMAN | 0.6696663  | 1.6960104 |
| sp Q00577 PURA_HUMAN    | 0.66973495 | 2.1818786 |
| sp P19827 ITIH1_HUMAN   | 0.670084   | 3.1266599 |
| sp P27169 PON1_HUMAN    | 0.6712704  | 1.6960104 |
| sp Q8NBJ7 SUMF2_HUMAN   | 0.6717377  | 2.1818786 |
| sp O43852-5 CALU_HUMAN  | 0.672102   | 1.6960104 |
| sp P02647 APOA1_HUMAN   | 0.6724167  | 13.420564 |
| sp P30519 HMOX2_HUMAN   | 0.6726227  | 2.1818786 |
| sp P55809 SCOT1_HUMAN   | 0.6733322  | 2.1818786 |

|                         |            |           |
|-------------------------|------------|-----------|
| sp P28331-3 NDUS1_HUMAN | 0.6733608  | 3.1266599 |
| sp Q8WVM8 SCFD1_HUMAN   | 0.67386246 | 2.1818786 |
| sp O75340-2 PDCD6_HUMAN | 0.6746063  | 1.6960104 |
| sp Q9Y262 EIF3L_HUMAN   | 0.67466545 | 4.509013  |
| sp P47897 SYQ_HUMAN     | 0.67484665 | 2.6576471 |
| sp Q9NZN4 EHD2_HUMAN    | 0.6748562  | 9.893875  |
| sp Q04637-4 IF4G1_HUMAN | 0.6751785  | 2.1818786 |
| sp P11171-2 41_HUMAN    | 0.6762314  | 1.6960104 |
| sp P13693 TCTP_HUMAN    | 0.676466   | 1.6960104 |
| sp P00751 CFAB_HUMAN    | 0.676651   | 12.553017 |
| sp P35573 GDE_HUMAN     | 0.6772232  | 1.6960104 |
| sp P55084 ECHB_HUMAN    | 0.678566   | 5.417897  |
| sp P00915 CAH1_HUMAN    | 0.67910767 | 6.3204336 |
| sp Q9BUJ2-4 HNRL1_HUMAN | 0.6795311  | 3.1266599 |
| sp O95202 LETM1_HUMAN   | 0.6798382  | 2.1818786 |
| sp Q13177 PAK2_HUMAN    | 0.6798935  | 2.1818786 |
| sp P28070 PSB4_HUMAN    | 0.6801014  | 2.6576471 |
| sp Q6YN16 HSDL2_HUMAN   | 0.6801386  | 3.5908275 |
| sp Q9BWM7 SFXN3_HUMAN   | 0.68032074 | 2.1818786 |
| sp P21281 VATB2_HUMAN   | 0.68114376 | 4.964395  |
| sp P16435 NCPR_HUMAN    | 0.6813946  | 6.3204336 |
| sp P04040 CATA_HUMAN    | 0.68141174 | 10.743512 |
| sp P02462 CO4A1_HUMAN   | 0.6825161  | 2.6576471 |
| sp P23142 FBLN1_HUMAN   | 0.6829376  | 2.4829872 |
| sp P09917-3 LOX5_HUMAN  | 0.6829529  | 1.6960104 |
| sp P42126-2 ECI1_HUMAN  | 0.6829796  | 1.6960104 |
| sp O75874 IDHC_HUMAN    | 0.68301773 | 5.0928617 |
| sp Q10567-2 AP1B1_HUMAN | 0.68323517 | 2.1818786 |
| sp P24666-2 PPAC_HUMAN  | 0.6840668  | 1.6960104 |
| sp Q13884 SNTB1_HUMAN   | 0.68449783 | 1.6960104 |
| sp P54920 SNAA_HUMAN    | 0.68450165 | 4.964395  |
| sp Q9UMS4 PRP19_HUMAN   | 0.68475914 | 1.6960104 |
| sp P84098 RL19_HUMAN    | 0.6853695  | 1.6960104 |
| sp O60504-2 VINEX_HUMAN | 0.68574715 | 1.6960104 |
| sp P26196 DDX6_HUMAN    | 0.68639183 | 1.6960104 |
| sp Q16658 FSCN1_HUMAN   | 0.68821526 | 6.3204336 |
| sp Q92598-2 HS105_HUMAN | 0.6883888  | 2.7624686 |
| sp P25789 PSA4_HUMAN    | 0.68867874 | 3.1266599 |
| sp O75695 XRP2_HUMAN    | 0.6891651  | 1.6960104 |
| sp P05023-4 AT1A1_HUMAN | 0.6893387  | 9.893875  |
| sp O14818 PSA7_HUMAN    | 0.68961906 | 2.6576471 |
| sp Q15393 SF3B3_HUMAN   | 0.68972206 | 5.869831  |
| sp Q9UJU6-2 DBNL_HUMAN  | 0.6912689  | 2.1818786 |
| sp Q92945 FUBP2_HUMAN   | 0.69148254 | 4.051346  |
| sp P05198 IF2A_HUMAN    | 0.6918869  | 2.1818786 |

|                         |            |           |
|-------------------------|------------|-----------|
| sp P26368-2 U2AF2_HUMAN | 0.69213676 | 1.6960104 |
| sp P01023 A2MG_HUMAN    | 0.6921902  | 14.423111 |
| sp Q15691 MARE1_HUMAN   | 0.69246864 | 3.5908275 |
| sp Q06136 KDSR_HUMAN    | 0.69257164 | 2.1818786 |
| sp P15144 AMPN_HUMAN    | 0.6926975  | 2.1818786 |
| sp P16615 AT2A2_HUMAN   | 0.69296646 | 4.575238  |
| sp P67936 TPM4_HUMAN    | 0.692997   | 4.509013  |
| sp Q5JWF2-2 GNAS1_HUMAN | 0.6938591  | 2.6576471 |
| sp P04114 APOB_HUMAN    | 0.69519806 | 12.996504 |
| sp P12111 CO6A3_HUMAN   | 0.6957321  | 4.2451677 |
| sp O14579 COPE_HUMAN    | 0.69584656 | 3.5908275 |
| sp P02749 APOH_HUMAN    | 0.69628143 | 3.1266599 |
| sp P07738 PMGE_HUMAN    | 0.6978836  | 2.1818786 |
| sp Q1KMD3 HNRL2_HUMAN   | 0.6989536  | 6.3204336 |
| sp P50502 F10A1_HUMAN   | 0.6994648  | 2.151766  |
| sp Q9BTW9-4 TBCD_HUMAN  | 0.69997406 | 1.6960104 |
| sp O43390-2 HNRPR_HUMAN | 0.7002754  | 5.869831  |
| sp Q92597 NDRG1_HUMAN   | 0.7014408  | 2.1818786 |
| sp Q9ULA0 DNPEP_HUMAN   | 0.7023983  | 4.051346  |
| sp P38606-2 VATA_HUMAN  | 0.70370865 | 5.417897  |
| sp P30043 BLVRB_HUMAN   | 0.70384216 | 2.1818786 |
| sp Q9HC35-2 EMAL4_HUMAN | 0.70405006 | 4.509013  |
| sp P27816-2 MAP4_HUMAN  | 0.7040596  | 1.6960104 |
| sp P55884-2 EIF3B_HUMAN | 0.70425797 | 2.6576471 |
| sp P07384 CAN1_HUMAN    | 0.7042656  | 9.762187  |
| sp P30520 PURA2_HUMAN   | 0.704895   | 1.9647322 |
| sp Q9UNH7 SNX6_HUMAN    | 0.704916   | 2.6576471 |
| sp P61163 ACTZ_HUMAN    | 0.70677185 | 2.6576471 |
| sp P48643 TCPE_HUMAN    | 0.70840454 | 6.918803  |
| sp Q6UVK1 CSPG4_HUMAN   | 0.70853615 | 3.1266599 |
| sp Q9BSJ8-2 ESYT1_HUMAN | 0.7090244  | 6.3204336 |
| sp Q6XQN6 PNCB_HUMAN    | 0.70934296 | 5.869831  |
| sp Q15631 TSN_HUMAN     | 0.7094612  | 2.1818786 |
| sp Q16891-2 MIC60_HUMAN | 0.7096386  | 4.051346  |
| sp O94919 ENDD1_HUMAN   | 0.71105194 | 2.1818786 |
| sp Q99798 ACON_HUMAN    | 0.7111454  | 8.558914  |
| sp P10155-3 RO60_HUMAN  | 0.71154594 | 3.5908275 |
| sp Q9Y3Z3 SAMH1_HUMAN   | 0.71287155 | 8.107274  |
| sp O75643 U520_HUMAN    | 0.7137108  | 1.6960104 |
| sp P53041 PPP5_HUMAN    | 0.71411324 | 4.051346  |
| sp Q9UBV8 PEF1_HUMAN    | 0.7144222  | 1.6960104 |
| sp O60701 UGDH_HUMAN    | 0.7144871  | 3.1266599 |
| sp P16219 ACADS_HUMAN   | 0.714592   | 2.1818786 |
| sp P68104 EF1A1_HUMAN   | 0.71468353 | 6.9708595 |
| sp P08754 GNAI3_HUMAN   | 0.7151737  | 1.6960104 |

|                         |            |           |
|-------------------------|------------|-----------|
| sp P14174 MIF_HUMAN     | 0.71533394 | 1.6960104 |
| sp P17987 TCPA_HUMAN    | 0.7159786  | 6.3204336 |
| sp P60842 IF4A1_HUMAN   | 0.7165718  | 5.869831  |
| sp O00170 AIP_HUMAN     | 0.71679497 | 1.6960104 |
| sp P09972 ALDOC_HUMAN   | 0.717453   | 3.5908275 |
| sp Q9NYU2-2 UGGG1_HUM   | 0.7176113  | 8.112776  |
| sp P50991 TCPD_HUMAN    | 0.71837616 | 4.964395  |
| sp O75131 CPNE3_HUMAN   | 0.71907425 | 4.876761  |
| sp Q6WCQ1-2 MPRIP_HUM   | 0.71938324 | 5.869831  |
| sp Q9UH99-2 SUN2_HUMAN  | 0.7200527  | 2.6576471 |
| sp P53004 BIEA_HUMAN    | 0.7202015  | 3.5908275 |
| sp P18669 PGAM1_HUMAN   | 0.72058296 | 5.417897  |
| sp P01859 IGHG2_HUMAN   | 0.7207451  | 4.051346  |
| sp P47755 CAZA2_HUMAN   | 0.721035   | 3.760603  |
| sp P49368 TCPG_HUMAN    | 0.72141266 | 9.449409  |
| sp Q96IJ6-2 GMPPA_HUMAN | 0.72143936 | 2.6576471 |
| sp Q9NTJ5 SAC1_HUMAN    | 0.7217026  | 2.1818786 |
| sp Q7Z4W1 DCXR_HUMAN    | 0.72174454 | 3.5908275 |
| sp P05090 APOD_HUMAN    | 0.7219238  | 1.6960104 |
| sp Q96I99 SUCB2_HUMAN   | 0.7223606  | 4.051346  |
| sp Q12905 ILF2_HUMAN    | 0.72265244 | 5.417897  |
| sp O95479 G6PE_HUMAN    | 0.7226734  | 3.417183  |
| sp O60749-2 SNX2_HUMAN  | 0.7226944  | 4.509013  |
| sp P11142 HSP7C_HUMAN   | 0.722908   | 8.112776  |
| sp Q13561-2 DCTN2_HUMAN | 0.72306824 | 5.869831  |
| sp Q14980-2 NUMA1_HUMAN | 0.72333336 | 9.449409  |
| sp P30101 PDIA3_HUMAN   | 0.72340393 | 12.553017 |
| sp P10515 ODP2_HUMAN    | 0.7247162  | 3.5908275 |
| sp Q9BT78 CSN4_HUMAN    | 0.7249489  | 3.1266599 |
| sp P62829 RL23_HUMAN    | 0.72520065 | 1.6960104 |
| sp O75746-2 CMC1_HUMAN  | 0.72545624 | 2.1818786 |
| sp P62333 PRS10_HUMAN   | 0.7256775  | 3.5908275 |
| sp P35606-2 COPB2_HUMAN | 0.72581863 | 6.3204336 |
| sp Q13263 TIF1B_HUMAN   | 0.7262726  | 4.964395  |
| sp P17980 PRS6A_HUMAN   | 0.726326   | 4.509013  |
| sp P55209-2 NP1L1_HUMAN | 0.7263298  | 1.6960104 |
| sp P49720 PSB3_HUMAN    | 0.72660446 | 2.6576471 |
| sp P60174 TPIS_HUMAN    | 0.7270012  | 8.558914  |
| sp Q15046-2 SYK_HUMAN   | 0.7273369  | 3.5908275 |
| sp P04632 CPNS1_HUMAN   | 0.72743416 | 3.8337784 |
| sp Q92900-2 RENT1_HUMAN | 0.7297077  | 4.509013  |
| sp O00534 VMA5A_HUMAN   | 0.7299557  | 4.509013  |
| sp Q15717 ELAV1_HUMAN   | 0.72997856 | 1.6960104 |
| sp Q08257 QOR_HUMAN     | 0.7301407  | 4.509013  |
| sp Q96MM6 HS12B_HUMAN   | 0.73020554 | 4.509013  |

|                         |            |           |
|-------------------------|------------|-----------|
| sp P63167 DYL1_HUMAN    | 0.73023605 | 2.1818786 |
| sp O95336 6PGL_HUMAN    | 0.7311592  | 2.2385595 |
| sp P31943 HNRH1_HUMAN   | 0.7315922  | 3.1266599 |
| sp Q9H0W9-2 CK054_HUMA  | 0.7316017  | 2.36833   |
| sp Q99497 PARK7_HUMAN   | 0.7317791  | 4.051346  |
| sp Q07075 AMPE_HUMAN    | 0.7325916  | 1.6960104 |
| sp P05155-2 IC1_HUMAN   | 0.7326603  | 2.6576471 |
| sp Q03154-4 ACY1_HUMAN  | 0.7333832  | 2.6576471 |
| sp P11177-3 ODPB_HUMAN  | 0.733387   | 2.6576471 |
| sp P06737-2 PYGL_HUMAN  | 0.7334366  | 6.253077  |
| sp P27361 MK03_HUMAN    | 0.7342186  | 2.6576471 |
| sp Q9NSE4 SYIM_HUMAN    | 0.73423195 | 5.417897  |
| sp O14964-2 HGS_HUMAN   | 0.7347069  | 2.1818786 |
| sp P08236-2 BGLR_HUMAN  | 0.73524094 | 2.1818786 |
| sp P12268 IMDH2_HUMAN   | 0.73526    | 2.6576471 |
| sp Q9UNM6-2 PSD13_HUMA  | 0.73584366 | 2.6576471 |
| sp Q15366-2 PCBP2_HUMAN | 0.7359352  | 1.4104178 |
| sp P35221 CTNA1_HUMAN   | 0.7362976  | 10.776877 |
| sp Q9Y4L1 HYOU1_HUMAN   | 0.7366257  | 5.869831  |
| sp P02760 AMBP_HUMAN    | 0.7371826  | 3.1266599 |
| sp P12830 CADH1_HUMAN   | 0.73742676 | 1.6960104 |
| sp O75923-15 DYSF_HUMAN | 0.7376766  | 1.6960104 |
| sp P55795 HNRH2_HUMAN   | 0.73773575 | 1.6960104 |
| sp Q9BZZ5-3 API5_HUMAN  | 0.73794365 | 2.6576471 |
| sp Q9NQG5 RPR1B_HUMAN   | 0.7380276  | 1.6960104 |
| sp O43242 PSMD3_HUMAN   | 0.7380905  | 4.509013  |
| sp Q71U36-2 TBA1A_HUMA  | 0.7382088  | 3.4656596 |
| sp P05156 CFAI_HUMAN    | 0.7387676  | 3.5908275 |
| sp P30566 PUR8_HUMAN    | 0.7389946  | 1.6960104 |
| sp Q99829 CPNE1_HUMAN   | 0.73908997 | 2.1818786 |
| sp P49411 EFTU_HUMAN    | 0.73950577 | 6.3204336 |
| sp P05546 HEP2_HUMAN    | 0.73962593 | 3.1266599 |
| sp Q16630-3 CPSF6_HUMAN | 0.73968315 | 1.6960104 |
| sp P25325-2 THTM_HUMAN  | 0.7402992  | 2.1818786 |
| sp P46108 CRK_HUMAN     | 0.7403774  | 1.6960104 |
| sp O43795-2 MYO1B_HUMA  | 0.7406082  | 2.6576471 |
| sp Q9Y6W5 WASF2_HUMAN   | 0.7406235  | 2.6576471 |
| sp P06727 APOA4_HUMAN   | 0.740675   | 7.2183566 |
| sp Q9UI12-2 VATH_HUMAN  | 0.7408085  | 2.6576471 |
| sp P29622 KAIN_HUMAN    | 0.7417011  | 2.1818786 |
| sp P05556 ITB1_HUMAN    | 0.7436981  | 12.077333 |
| sp P31948 STIP1_HUMAN   | 0.7442169  | 6.7698927 |
| sp P22059 OSBP1_HUMAN   | 0.74445915 | 2.1818786 |
| sp Q9NY33 DPP3_HUMAN    | 0.7446499  | 5.417897  |
| sp Q16543 CDC37_HUMAN   | 0.7447281  | 4.4116287 |



|                         |            |            |
|-------------------------|------------|------------|
| sp Q9H4A4 AMPB_HUMAN    | 0.74487686 | 6.2179356  |
| sp Q9Y376 CAB39_HUMAN   | 0.74523926 | 1.6960104  |
| sp Q9UNF0-2 PACN2_HUMAN | 0.74563026 | 2.6576471  |
| sp P10301 RRAS_HUMAN    | 0.74669266 | 1.6960104  |
| sp P04275 VWF_HUMAN     | 0.7481842  | 9.615948   |
| sp Q96JB5-4 CK5P3_HUMAN | 0.7484112  | 2.1818786  |
| sp P53992 SC24C_HUMAN   | 0.7492008  | 2.6576471  |
| sp Q93009-3 UBP7_HUMAN  | 0.74973106 | 2.6576471  |
| sp Q8N335 GPD1L_HUMAN   | 0.75001526 | 2.1818786  |
| sp O15145 ARPC3_HUMAN   | 0.7501774  | 1.6960104  |
| sp P29401-2 TKT_HUMAN   | 0.7510681  | 14.311137  |
| sp Q9UBW8 CSN7A_HUMAN   | 0.7517395  | 1.6960104  |
| sp Q96C23 GALM_HUMAN    | 0.75212    | 1.6960104  |
| sp Q92841-1 DDX17_HUMAN | 0.7521534  | 7.2183566  |
| sp O60506-3 HNRPQ_HUMAN | 0.75229454 | 3.5908275  |
| sp Q96CW1-2 AP2M1_HUMAN | 0.7524624  | 3.1266599  |
| sp P41250 GARS_HUMAN    | 0.7527113  | 4.509013   |
| sp P23456 Trypsin       | 0.7534466  | 3.5908275  |
| sp P55072 TERA_HUMAN    | 0.7546463  | 14.423111  |
| sp P22061-2 PIMT_HUMAN  | 0.75530624 | 3.1266599  |
| sp O94973-2 AP2A2_HUMAN | 0.7558899  | 4.509013   |
| sp P50453 SPB9_HUMAN    | 0.7560959  | 5.417897   |
| sp Q16822 PCKGM_HUMAN   | 0.7565346  | 2.6576471  |
| sp Q9Y5P6-2 GMPPB_HUMAN | 0.7567005  | 3.5908275  |
| sp P08559-2 ODPA_HUMAN  | 0.75798225 | 4.509013   |
| sp Q9UBF2 COPG2_HUMAN   | 0.75868416 | 1.6960104  |
| sp P07099 HYEP_HUMAN    | 0.759037   | 9.449409   |
| sp P12955 PEPD_HUMAN    | 0.7593498  | 3.5908275  |
| sp P63000-2 RAC1_HUMAN  | 0.7596111  | 1.6960104  |
| sp P43034 LIS1_HUMAN    | 0.75961876 | 4.509013   |
| sp P36776-2 LONM_HUMAN  | 0.75984    | 4.051346   |
| sp Q5EBM0-3 CMPK2_HUMAN | 0.7599449  | 1.6960104  |
| sp Q04446 GLGB_HUMAN    | 0.7599716  | 3.5908275  |
| sp P35998 PRS7_HUMAN    | 0.76024437 | 4.964395   |
| sp Q14914-2 PTGR1_HUMAN | 0.760458   | 2.1818786  |
| sp P78527 PRKDC_HUMAN   | 0.7612152  | 2.1818786  |
| sp P12270 TPR_HUMAN     | 0.76135635 | 3.4979637  |
| sp Q9NUQ9 FA49B_HUMAN   | 0.76410675 | 2.1818786  |
| sp O60884 DNJA2_HUMAN   | 0.76584435 | 2.6576471  |
| sp P19367-3 HXX1_HUMAN  | 0.76649857 | 9.449409   |
| sp P09619 PGFRB_HUMAN   | 0.7690582  | 1.3815327  |
| sp P31939 PUR9_HUMAN    | 0.7692909  | 6.3204336  |
| sp P13639 EF2_HUMAN     | 0.770422   | 15.4774685 |
| sp Q9NQR4 NIT2_HUMAN    | 0.7709961  | 2.1818786  |
| sp P00734 THRB_HUMAN    | 0.7710228  | 5.417897   |

|                         |            |           |
|-------------------------|------------|-----------|
| sp P27348 1433T_HUMAN   | 0.77150726 | 3.5908275 |
| sp P00390-2 GSHR_HUMAN  | 0.7721863  | 2.6576471 |
| sp O95372 LYPA2_HUMAN   | 0.7733402  | 1.6960104 |
| sp Q3LXA3 TKFC_HUMAN    | 0.7747383  | 3.8058946 |
| sp P54136 SYRC_HUMAN    | 0.7751808  | 3.5908275 |
| sp Q9Y3F4-2 STRAP_HUMAN | 0.7756939  | 1.6960104 |
| sp Q9NRN5 OLFL3_HUMAN   | 0.7759361  | 3.5908275 |
| sp Q9BY32 ITPA_HUMAN    | 0.77740765 | 2.1818786 |
| sp P52209-2 6PGD_HUMAN  | 0.77832794 | 8.112776  |
| sp Q99598 TSNAX_HUMAN   | 0.7785835  | 1.6960104 |
| sp O43865 SAHH2_HUMAN   | 0.77861404 | 2.6576471 |
| sp Q96KP4 CNDP2_HUMAN   | 0.77967834 | 9.893875  |
| sp Q86X76-2 NIT1_HUMAN  | 0.7798004  | 1.6960104 |
| sp Q5K4L6-2 S27A3_HUMAN | 0.7804241  | 1.6960104 |
| sp O95861-4 BPNT1_HUMAN | 0.78053284 | 3.1266599 |
| sp Q6NVY1 HIBCH_HUMAN   | 0.7807083  | 2.1818786 |
| sp Q15942 ZYX_HUMAN     | 0.78110886 | 4.509013  |
| sp P19474 RO52_HUMAN    | 0.781332   | 1.6960104 |
| sp Q9P2R7-2 SUCB1_HUMAN | 0.7813492  | 3.1266599 |
| sp P53602 MVD1_HUMAN    | 0.78147316 | 1.6960104 |
| sp P43686 PRS6B_HUMAN   | 0.78235626 | 4.051346  |
| sp O15031 PLXB2_HUMAN   | 0.7829895  | 4.051346  |
| sp P62140 PP1B_HUMAN    | 0.7833328  | 1.6960104 |
| sp Q15257-2 PTPA_HUMAN  | 0.78339386 | 3.1266599 |
| sp P54577 SYYC_HUMAN    | 0.783823   | 1.6960104 |
| sp P27695 APEX1_HUMAN   | 0.7840309  | 2.1818786 |
| sp Q99733-2 NP1L4_HUMAN | 0.78410625 | 1.6960104 |
| sp O94776 MTA2_HUMAN    | 0.78453636 | 1.6960104 |
| sp P68366-2 TBA4A_HUMAN | 0.7847309  | 2.1818786 |
| sp O95340-2 PAPS2_HUMAN | 0.78551865 | 3.5908275 |
| sp P63010-2 AP2B1_HUMAN | 0.7859726  | 3.5908275 |
| sp P15121 ALDR_HUMAN    | 0.7862816  | 4.964395  |
| sp P05165-2 PCCA_HUMAN  | 0.78678894 | 5.869831  |
| sp P00450 CERU_HUMAN    | 0.7869339  | 11.224656 |
| sp O94760 DDAH1_HUMAN   | 0.7871895  | 2.6576471 |
| sp Q13425 SNTB2_HUMAN   | 0.7879486  | 2.6576471 |
| sp P35222 CTNB1_HUMAN   | 0.7888546  | 4.509013  |
| sp Q12797-10 ASPH_HUMAN | 0.7891159  | 4.051346  |
| sp Q13423 NNTM_HUMAN    | 0.78920364 | 4.509013  |
| sp Q7Z4I7-3 LIMS2_HUMAN | 0.7894325  | 1.6960104 |
| sp Q96G03 PGM2_HUMAN    | 0.7896557  | 3.1266599 |
| sp P07900-2 HS90A_HUMAN | 0.78990173 | 9.004438  |
| sp P46976 GLYG_HUMAN    | 0.78992844 | 2.1818786 |
| sp P78371 TCPB_HUMAN    | 0.7899952  | 6.7073655 |
| sp P48637 GSHB_HUMAN    | 0.79016876 | 4.964395  |

|                         |            |           |
|-------------------------|------------|-----------|
| sp P11686-2 PSPC_HUMAN  | 0.79063797 | 1.6960104 |
| sp P00352 AL1A1_HUMAN   | 0.79070663 | 10.781506 |
| sp P46063 RECQ1_HUMAN   | 0.79083633 | 3.5908275 |
| sp Q96QK1 VPS35_HUMAN   | 0.79099274 | 4.4116287 |
| sp O43776 SYNC_HUMAN    | 0.79105186 | 3.5908275 |
| sp P00441 SODC_HUMAN    | 0.79286194 | 2.6576471 |
| sp P62753 RS6_HUMAN     | 0.7930565  | 2.1818786 |
| sp Q15833-2 STXB2_HUMAN | 0.7933254  | 1.6960104 |
| sp P42224-2 STAT1_HUMAN | 0.7933464  | 4.051346  |
| sp Q7KZF4 SND1_HUMAN    | 0.7935982  | 4.051346  |
| sp O00429-3 DNM1L_HUMA  | 0.7957363  | 4.051346  |
| sp Q8NHV1 GIMA7_HUMAN   | 0.79647446 | 1.6960104 |
| sp P05166-2 PCCB_HUMAN  | 0.7966919  | 5.417897  |
| sp Q08211 DHX9_HUMAN    | 0.79685783 | 10.179513 |
| sp P26640 SYVC_HUMAN    | 0.7970104  | 4.051346  |
| sp Q16775-2 GLO2_HUMAN  | 0.7982054  | 1.6960104 |
| sp Q13098-5 CSN1_HUMAN  | 0.799757   | 2.6576471 |
| sp P48668 K2C6C_HUMAN   | 0.7997818  | 1.9951487 |
| sp Q9Y678 COPG1_HUMAN   | 0.79990387 | 8.112776  |
| sp O14950 ML12B_HUMAN   | 0.7999172  | 2.1818786 |
| sp Q9HCB6 SPON1_HUMAN   | 0.8001785  | 4.509013  |
| sp P12956 XRCC6_HUMAN   | 0.8007355  | 8.112776  |
| sp Q15029-2 U5S1_HUMAN  | 0.8010845  | 6.3204336 |
| sp P23946 CMA1_HUMAN    | 0.80146027 | 2.1818786 |
| sp O15355 PPM1G_HUMAN   | 0.80153084 | 1.6960104 |
| sp P62937 PIIA_HUMAN    | 0.8019924  | 1.6960104 |
| sp Q8N163-2 CCAR2_HUMA  | 0.80282974 | 2.1818786 |
| sp P08571 CD14_HUMAN    | 0.803215   | 2.6576471 |
| sp Q9BR76 COR1B_HUMAN   | 0.80358124 | 4.051346  |
| sp P07814 SYEP_HUMAN    | 0.8038063  | 5.869831  |
| sp O43143 DHX15_HUMAN   | 0.80399513 | 3.5908275 |
| sp Q99832 TCPH_HUMAN    | 0.80519676 | 3.5908275 |
| sp P16152 CBR1_HUMAN    | 0.8055248  | 5.869831  |
| sp P02765 FETUA_HUMAN   | 0.80742836 | 1.8444856 |
| sp Q9Y6C2 EMIL1_HUMAN   | 0.808733   | 7.665951  |
| sp O75368 SH3L1_HUMAN   | 0.8093376  | 1.6960104 |
| sp O60784 TOM1_HUMAN    | 0.80973434 | 2.1818786 |
| sp Q6P2Q9 PRP8_HUMAN    | 0.81106186 | 3.1266599 |
| sp Q9HBL0 TENS1_HUMAN   | 0.8111973  | 6.7698927 |
| sp Q9UKG1 DP13A_HUMAN   | 0.8112335  | 1.6960104 |
| sp Q16853 AOC3_HUMAN    | 0.8119106  | 7.665951  |
| sp Q15075 EEA1_HUMAN    | 0.8125019  | 6.7698927 |
| sp O00571-2 DDX3X_HUMAN | 0.8130474  | 1.6960104 |
| sp P08238 HS90B_HUMAN   | 0.81427765 | 7.2183566 |
| sp Q9Y3A5 SBDS_HUMAN    | 0.81427956 | 2.1818786 |

|                         |            |            |
|-------------------------|------------|------------|
| sp P13010 XRCC5_HUMAN   | 0.8148327  | 8.558914   |
| sp P62195 PRS8_HUMAN    | 0.8149414  | 2.1818786  |
| sp P53618 COPB_HUMAN    | 0.81515884 | 5.869831   |
| sp P13798 ACPH_HUMAN    | 0.81518173 | 5.417897   |
| sp Q16851-2 UGPA_HUMAN  | 0.81529045 | 5.869831   |
| sp Q13488 VPP3_HUMAN    | 0.816061   | 1.6960104  |
| sp Q53GG5-2 PDLI3_HUMAN | 0.81663513 | 1.6960104  |
| sp Q7Z4H8 PLGT3_HUMAN   | 0.8166981  | 2.1818786  |
| sp P48147 PPCE_HUMAN    | 0.8168316  | 3.5908275  |
| sp P00488 F13A_HUMAN    | 0.81767654 | 7.2183566  |
| sp Q16531 DDB1_HUMAN    | 0.8178196  | 8.112776   |
| sp P30084 ECHM_HUMAN    | 0.8183193  | 2.6576471  |
| sp Q5T013-4 HYI_HUMAN   | 0.81840897 | 1.6960104  |
| sp Q00610-2 CLH1_HUMAN  | 0.81847763 | 12.110734  |
| sp P28838-2 AMPL_HUMAN  | 0.8191891  | 10.781506  |
| sp O60610-2 DIAP1_HUMAN | 0.8195095  | 3.1266599  |
| sp P30041 PRDX6_HUMAN   | 0.8195133  | 5.442546   |
| sp Q13045-3 FLII_HUMAN  | 0.8200226  | 3.1266599  |
| sp Q02790 FKBP4_HUMAN   | 0.8202934  | 2.6576471  |
| sp Q92888-2 ARHG1_HUMA  | 0.8212185  | 1.6960104  |
| sp Q86VS8 HOOK3_HUMAN   | 0.8223076  | 1.6960104  |
| sp P43121 MUC18_HUMAN   | 0.82268524 | 1.6960104  |
| sp Q01469 FABP5_HUMAN   | 0.8251457  | 4.964395   |
| sp Q9UBE0 SAE1_HUMAN    | 0.82611847 | 2.1818786  |
| sp Q04760-2 LGUL_HUMAN  | 0.82748604 | 2.1818786  |
| sp Q13363 CTBP1_HUMAN   | 0.8275795  | 2.1818786  |
| sp O95782-2 AP2A1_HUMAN | 0.8281002  | 4.509013   |
| sp Q92556 ELMO1_HUMAN   | 0.8285084  | 1.6960104  |
| sp P24752 THIL_HUMAN    | 0.82870865 | 7.2183566  |
| sp P0DMV9 HS71B_HUMAN   | 0.82935905 | 10.4031105 |
| sp Q13200 PSMD2_HUMAN   | 0.83013535 | 1.6960104  |
| sp Q9BXN1 ASPN_HUMAN    | 0.8307228  | 2.1818786  |
| sp Q562R1 ACTBL_HUMAN   | 0.83073235 | 1.6960104  |
| sp Q9UPN3 MACF1_HUMAN   | 0.83294106 | 1.6960104  |
| sp Q13618-2 CUL3_HUMAN  | 0.8335724  | 3.1266599  |
| sp O95865 DDAH2_HUMAN   | 0.8337841  | 4.509013   |
| sp P29144 TPP2_HUMAN    | 0.83657265 | 3.1266599  |
| sp Q9Y3I0 RTCB_HUMAN    | 0.8373146  | 4.051346   |
| sp P53621-2 COPA_HUMAN  | 0.8374653  | 8.112776   |
| sp P00558 PGK1_HUMAN    | 0.83821297 | 10.337908  |
| sp Q8WVV9-5 HNRLL_HUMAN | 0.8398247  | 1.6960104  |
| sp Q7L1Q6-2 BZW1_HUMAN  | 0.839859   | 2.1818786  |
| sp Q9P2B2 FPRP_HUMAN    | 0.8405876  | 2.1818786  |
| sp Q99873-2 ANM1_HUMAN  | 0.84198    | 2.1818786  |
| sp Q06210-2 GFPT1_HUMAN | 0.842823   | 4.509013   |

|                         |            |           |
|-------------------------|------------|-----------|
| sp P51178-2 PLCD1_HUMAN | 0.843338   | 1.6960104 |
| sp Q99460-2 PSMD1_HUMAN | 0.84338    | 3.5908275 |
| sp P35611-2 ADDA_HUMAN  | 0.84462357 | 3.5908275 |
| sp P00387-3 NB5R3_HUMAN | 0.8450947  | 4.509013  |
| sp P08294 SODE_HUMAN    | 0.84540176 | 2.6576471 |
| sp P31153 METK2_HUMAN   | 0.8463974  | 1.6960104 |
| sp Q7Z5L7-2 PODN_HUMAN  | 0.84640884 | 1.6960104 |
| sp Q14204 DYHC1_HUMAN   | 0.8465729  | 10.337908 |
| sp P46109 CRKL_HUMAN    | 0.846756   | 1.6960104 |
| sp O94826 TOM70_HUMAN   | 0.8473091  | 2.6576471 |
| sp P47985 UCRI_HUMAN    | 0.84845257 | 1.6960104 |
| sp P09104-2 ENOG_HUMAN  | 0.8485527  | 2.6576471 |
| sp Q96HC4 PDLI5_HUMAN   | 0.8529968  | 3.5908275 |
| sp P23141-3 EST1_HUMAN  | 0.8530445  | 11.224656 |
| sp O00151 PDLI1_HUMAN   | 0.8532047  | 4.4116287 |
| sp Q01813 PFKAP_HUMAN   | 0.8536396  | 3.1266599 |
| sp P01031 CO5_HUMAN     | 0.8540821  | 5.869831  |
| sp Q14240-2 IF4A2_HUMAN | 0.85463333 | 2.1818786 |
| sp Q8IWL2-2 SFTA1_HUMAN | 0.85541344 | 4.509013  |
| sp P55735 SEC13_HUMAN   | 0.8557339  | 1.6960104 |
| sp P28482 MK01_HUMAN    | 0.85770035 | 2.6576471 |
| sp P09417 DHPR_HUMAN    | 0.8587036  | 1.6960104 |
| sp P52943 CRIP2_HUMAN   | 0.8591194  | 2.1818786 |
| sp P23634-2 AT2B4_HUMAN | 0.8596153  | 3.1266599 |
| sp P33176 KINH_HUMAN    | 0.8598404  | 5.869831  |
| sp P46926 GNPI1_HUMAN   | 0.86058044 | 2.1818786 |
| sp P00966 ASSY_HUMAN    | 0.86125374 | 3.1266599 |
| sp Q15404 RSU1_HUMAN    | 0.86125755 | 4.964395  |
| sp P55786 PSA_HUMAN     | 0.86164093 | 9.004438  |
| sp P27694 RFA1_HUMAN    | 0.8622761  | 2.6576471 |
| sp P51884 LUM_HUMAN     | 0.862833   | 8.112776  |
| sp P63096 GNAI1_HUMAN   | 0.8630676  | 1.6960104 |
| sp Q15019-2 SEPT2_HUMAN | 0.86340714 | 4.964395  |
| sp Q07954 LRP1_HUMAN    | 0.86481476 | 9.449409  |
| sp P50395 GDIB_HUMAN    | 0.86533546 | 8.558914  |
| sp P46459 NSF_HUMAN     | 0.8659115  | 4.051346  |
| sp P13861 KAP2_HUMAN    | 0.86603546 | 6.3204336 |
| sp P40939 ECHA_HUMAN    | 0.86701584 | 13.151816 |
| sp P32455 GBP1_HUMAN    | 0.8677521  | 4.051346  |
| sp Q96CN7 ISOC1_HUMAN   | 0.86816597 | 3.1266599 |
| sp P67936-2 TPM4_HUMAN  | 0.8700237  | 2.6576471 |
| sp Q969G5 CAVN3_HUMAN   | 0.87070656 | 2.1818786 |
| sp P00338 LDHA_HUMAN    | 0.8709297  | 8.112776  |
| sp Q13630 FCL_HUMAN     | 0.8709755  | 1.6960104 |
| sp Q9UGI8-2 TES_HUMAN   | 0.8712158  | 3.267311  |

|                         |            |           |
|-------------------------|------------|-----------|
| sp Q9UHB9-4 SRP68_HUMA  | 0.8715515  | 1.6960104 |
| sp Q14203-4 DCTN1_HUMAI | 0.87194824 | 3.760603  |
| sp O75534-2 CSDE1_HUMAN | 0.8721962  | 1.6960104 |
| sp P11586 C1TC_HUMAN    | 0.87239075 | 3.5908275 |
| sp P09960 LKHA4_HUMAN   | 0.8735981  | 9.893875  |
| sp Q9BRA2 TXD17_HUMAN   | 0.8739815  | 1.6960104 |
| sp Q16401-2 PSMD5_HUMA  | 0.874279   | 5.417897  |
| sp P18428 LBP_HUMAN     | 0.8767128  | 2.1818786 |
| sp Q9NRV9 HEBP1_HUMAN   | 0.87690544 | 2.1818786 |
| sp P40925-2 MDHC_HUMAN  | 0.8779259  | 5.869831  |
| sp Q9UEY8 ADDG_HUMAN    | 0.8824539  | 3.5908275 |
| sp O00232 PSD12_HUMAN   | 0.88269234 | 3.1266599 |
| sp P52306 GDS1_HUMAN    | 0.8828869  | 1.6960104 |
| sp P13716-2 HEM2_HUMAN  | 0.8836136  | 3.4656596 |
| sp P02787 TRFE_HUMAN    | 0.88481903 | 15.35253  |
| sp P35270 SPRE_HUMAN    | 0.884922   | 2.1818786 |
| sp O60879-2 DIAP2_HUMAN | 0.8860855  | 1.6960104 |
| sp P34932 HSP74_HUMAN   | 0.886158   | 7.2183566 |
| sp O14974-3 MYPT1_HUMAI | 0.88624954 | 3.1266599 |
| sp Q13126-2 MTAP_HUMAN  | 0.88694954 | 2.6576471 |
| sp Q9NVD7 PARVA_HUMAN   | 0.88752747 | 3.1266599 |
| sp Q8IZ83-3 A16A1_HUMAN | 0.8888893  | 4.509013  |
| sp P50570-5 DYN2_HUMAN  | 0.88993454 | 3.5908275 |
| sp P11413-3 G6PD_HUMAN  | 0.8911648  | 5.417897  |
| sp O14558 HSPB6_HUMAN   | 0.89258575 | 2.1818786 |
| sp O14980 XPO1_HUMAN    | 0.89279366 | 2.1818786 |
| sp Q9BUF5 TBB6_HUMAN    | 0.89439774 | 1.6960104 |
| sp P26639-2 SYTC_HUMAN  | 0.8963852  | 3.5908275 |
| sp P00568 KAD1_HUMAN    | 0.89810944 | 4.964395  |
| sp Q13409-2 DC112_HUMAN | 0.8986492  | 3.1266599 |
| sp P22105-1 TENX_HUMAN  | 0.89974594 | 11.667864 |
| sp Q92696 PGTA_HUMAN    | 0.8998928  | 2.1818786 |
| sp Q14847 LASP1_HUMAN   | 0.900301   | 3.1266599 |
| sp P54802 ANAG_HUMAN    | 0.90137386 | 1.6960104 |
| sp P0DOX5 IGG1_HUMAN    | 0.9021969  | 2.7685447 |
| sp P34896-2 GLYC_HUMAN  | 0.90231514 | 2.1818786 |
| sp P30153 2AAA_HUMAN    | 0.90418625 | 7.665951  |
| sp Q96C86 DCPS_HUMAN    | 0.904253   | 3.1266599 |
| sp A0AVT1 UBA6_HUMAN    | 0.90460396 | 2.1818786 |
| sp Q14764 MVP_HUMAN     | 0.90491486 | 13.420564 |
| sp P24821-4 TENA_HUMAN  | 0.9065857  | 7.2183566 |
| sp P23526 SAHH_HUMAN    | 0.907444   | 6.7698927 |
| sp Q93052 LPP_HUMAN     | 0.90802765 | 4.964395  |
| sp Q92499 DDX1_HUMAN    | 0.90812683 | 5.417897  |
| sp P17858-2 PFKAL_HUMAN | 0.91038895 | 4.964395  |

|                         |            |           |
|-------------------------|------------|-----------|
| sp Q07866-10 KLC1_HUMAN | 0.9107094  | 1.6960104 |
| sp Q6P179 ERAP2_HUMAN   | 0.911726   | 2.1818786 |
| sp P07357 CO8A_HUMAN    | 0.9117737  | 3.5908275 |
| sp Q8N2S1-3 LTBP4_HUMAN | 0.91186523 | 4.051346  |
| sp P53396-2 ACLY_HUMAN  | 0.9121494  | 7.665951  |
| sp Q6DD88 ATLA3_HUMAN   | 0.9121895  | 3.1266599 |
| sp Q9NRX4 PHP14_HUMAN   | 0.91241074 | 1.6960104 |
| sp P17655 CAN2_HUMAN    | 0.9135647  | 10.337908 |
| sp O60763-2 USO1_HUMAN  | 0.91495895 | 4.509013  |
| sp P98095-2 FBLN2_HUMAN | 0.91610336 | 4.285869  |
| sp P08572 CO4A2_HUMAN   | 0.9161911  | 4.051346  |
| sp P20591 MX1_HUMAN     | 0.9162941  | 1.6960104 |
| sp Q9NVA2 SEP11_HUMAN   | 0.9164009  | 4.509013  |
| sp O43813 LANC1_HUMAN   | 0.9198704  | 2.6576471 |
| sp Q9HC38-2 GLOD4_HUMAN | 0.9199772  | 3.1266599 |
| sp O15061-2 SYNEM_HUMAN | 0.92007256 | 4.051346  |
| sp Q12805-2 FBLN3_HUMAN | 0.9225292  | 6.3204336 |
| sp P08133 ANXA6_HUMAN   | 0.92287064 | 15.95459  |
| sp P01019 ANGT_HUMAN    | 0.92414093 | 2.6576471 |
| sp O00291 HIP1_HUMAN    | 0.9248009  | 1.9647322 |
| sp P42330 AK1C3_HUMAN   | 0.9255905  | 2.1818786 |
| sp P12277 KCRB_HUMAN    | 0.92560005 | 4.509013  |
| sp P30086 PEBP1_HUMAN   | 0.92731285 | 4.051346  |
| sp Q8WUM4 PDC6I_HUMAN   | 0.92856216 | 11.667864 |
| sp P36955 PEDF_HUMAN    | 0.9296112  | 3.5908275 |
| sp Q99758 ABCA3_HUMAN   | 0.9299469  | 3.1266599 |
| sp Q15436 SC23A_HUMAN   | 0.93017197 | 2.6576471 |
| sp Q709C8-2 VP13C_HUMAN | 0.9304056  | 1.6960104 |
| sp O00410 IPO5_HUMAN    | 0.93053055 | 3.1266599 |
| sp Q9UBT2 SAE2_HUMAN    | 0.93066406 | 3.1266599 |
| sp Q06124-2 PTN11_HUMAN | 0.9316063  | 2.1818786 |
| sp Q9NSD9 SYFB_HUMAN    | 0.93164825 | 1.6960104 |
| sp P02743 SAMP_HUMAN    | 0.93309593 | 4.051346  |
| sp Q8TBC4 UBA3_HUMAN    | 0.9333992  | 2.6576471 |
| sp P13489 RINI_HUMAN    | 0.93445396 | 9.893875  |
| sp P22314-2 UBA1_HUMAN  | 0.93634796 | 12.996504 |
| sp P49327 FAS_HUMAN     | 0.9367542  | 12.996504 |
| sp P48163 MAOX_HUMAN    | 0.9406948  | 3.1266599 |
| sp Q16555 DPYL2_HUMAN   | 0.94083023 | 8.112776  |
| sp P06756-3 ITAV_HUMAN  | 0.9409752  | 3.5908275 |
| sp Q15582 BGH3_HUMAN    | 0.9419174  | 8.558914  |
| sp Q27J81-2 INF2_HUMAN  | 0.94209385 | 1.6960104 |
| sp O75083 WDR1_HUMAN    | 0.9438553  | 10.337908 |
| sp Q15121 PEA15_HUMAN   | 0.9510803  | 1.6960104 |
| sp Q15274 NADC_HUMAN    | 0.9520302  | 2.1818786 |

|                         |            |           |
|-------------------------|------------|-----------|
| sp Q9ULV4-3 COR1C_HUMA  | 0.95223045 | 6.3204336 |
| sp P49915-2 GUAA_HUMAN  | 0.95495605 | 1.6960104 |
| sp P21980 TGM2_HUMAN    | 0.9551754  | 8.558914  |
| sp Q8NBF2-2 NHLC2_HUMA  | 0.95519257 | 1.6960104 |
| sp P07437 TBB5_HUMAN    | 0.95975685 | 2.1818786 |
| sp P08603 CFAH_HUMAN    | 0.9604988  | 15.176438 |
| sp Q16181-2 SEPT7_HUMAN | 0.9605503  | 7.2183566 |
| sp Q14974 IMB1_HUMAN    | 0.96253204 | 6.7698927 |
| sp Q9UBG0 MRC2_HUMAN    | 0.9682503  | 3.5908275 |
| sp P55060-3 XPO2_HUMAN  | 0.97229576 | 4.051346  |
| sp Q7Z7G0 TARSH_HUMAN   | 0.97302246 | 1.6960104 |
| sp P27338 AOFB_HUMAN    | 0.9742298  | 5.869831  |
| sp P49591 SYSC_HUMAN    | 0.97502136 | 4.509013  |
| sp P29466-2 CASP1_HUMAN | 0.97525215 | 1.6960104 |
| sp Q86VP6 CAND1_HUMAN   | 0.97608566 | 1.6960104 |
| sp P00918 CAH2_HUMAN    | 0.97735214 | 4.964395  |
| sp Q13451 FKBP5_HUMAN   | 0.97817993 | 2.6576471 |
| sp Q8IUX7 AEBP1_HUMAN   | 0.97891235 | 1.6960104 |
| sp P56199 ITA1_HUMAN    | 0.9810219  | 6.3204336 |
| sp P14550 AK1A1_HUMAN   | 0.9825096  | 6.7698927 |
| sp P46939-2 UTRO_HUMAN  | 0.9836674  | 10.337908 |
| sp P51888 PRELP_HUMAN   | 0.9849796  | 6.3204336 |
| sp P22897 MRC1_HUMAN    | 0.9853077  | 6.7698927 |
| sp Q6UWY5 OLFL1_HUMAN   | 0.9906597  | 4.509013  |
| sp P35555 FBN1_HUMAN    | 0.9908447  | 14.398287 |
| sp P49189 AL9A1_HUMAN   | 0.9921799  | 7.665951  |
| sp Q9P0V9-2 SEP10_HUMAN | 0.9966984  | 3.1266599 |
| sp Q9H008 LHPP_HUMAN    | 0.9979553  | 2.6576471 |
| sp P39059 COFA1_HUMAN   | 0.9992256  | 2.1818786 |
| sp O60831 PRAF2_HUMAN   | 1.001955   | 1.6960104 |
| sp Q9BZQ8 NIBAN_HUMAN   | 1.0023556  | 2.1818786 |
| sp P20774 MIME_HUMAN    | 1.0024014  | 4.051346  |
| sp Q9Y696 CLIC4_HUMAN   | 1.0026894  | 3.1266599 |
| sp P60660-2 MYL6_HUMAN  | 1.0029526  | 4.051346  |
| sp P31150 GDIA_HUMAN    | 1.0040798  | 4.964395  |
| sp Q9NZ08-2 ERAP1_HUMAN | 1.0042019  | 3.5908275 |
| sp P40763-2 STAT3_HUMAN | 1.0056744  | 4.964395  |
| sp P42704 LPPRC_HUMAN   | 1.007103   | 2.1818786 |
| sp Q14767 LTBP2_HUMAN   | 1.0074787  | 8.3491535 |
| sp Q04828 AK1C1_HUMAN   | 1.012495   | 1.6960104 |
| sp P36871 PGM1_HUMAN    | 1.0183372  | 9.004438  |
| sp P18084 ITB5_HUMAN    | 1.0217152  | 1.6960104 |
| sp P49588-2 SYAC_HUMAN  | 1.0238838  | 8.558914  |
| sp Q14195-2 DPYL3_HUMAN | 1.0241661  | 8.558914  |
| sp Q13813-2 SPTN1_HUMAN | 1.0275269  | 1.6960104 |



|                          |           |           |
|--------------------------|-----------|-----------|
| sp Q9UBQ7 GRHPR_HUMAN    | 1.0287685 | 1.6960104 |
| sp P49419-2 AL7A1_HUMAN  | 1.0307484 | 9.004438  |
| sp Q96AC1 FERM2_HUMAN    | 1.030941  | 8.558914  |
| sp Q07507 DERM_HUMAN     | 1.0312881 | 3.5908275 |
| sp P13797 PLST_HUMAN     | 1.0313969 | 8.112776  |
| sp P07195 LDHB_HUMAN     | 1.0316677 | 6.7698927 |
| sp O43488 ARK72_HUMAN    | 1.0330563 | 2.1818786 |
| sp P45974-2 UBP5_HUMAN   | 1.036581  | 6.7698927 |
| sp Q63ZY3-3 KANK2_HUMAN  | 1.0410957 | 3.5908275 |
| sp P06681 CO2_HUMAN      | 1.0414696 | 3.5908275 |
| sp P07358 CO8B_HUMAN     | 1.0441036 | 2.1818786 |
| sp Q9BUT1 BDH2_HUMAN     | 1.0467987 | 2.6576471 |
| sp Q13418 ILK_HUMAN      | 1.0470257 | 4.509013  |
| sp P02748 CO9_HUMAN      | 1.0475979 | 5.869831  |
| sp P10643 CO7_HUMAN      | 1.0540695 | 4.964395  |
| sp P13671 CO6_HUMAN      | 1.0557022 | 3.5908275 |
| sp P10768 ESTD_HUMAN     | 1.0654564 | 2.6576471 |
| sp P21810 PGS1_HUMAN     | 1.066288  | 5.869831  |
| sp P08237-3 PFKAM_HUMAN  | 1.069706  | 2.1818786 |
| sp Q9Y2A7-2 NCKP1_HUMAN  | 1.0699844 | 1.6960104 |
| sp O43707 ACTN4_HUMAN    | 1.0736923 | 14.75047  |
| sp P07585 PGS2_HUMAN     | 1.0751305 | 5.869831  |
| sp Q8WX93-5 PALLD_HUMAN  | 1.075592  | 5.417897  |
| sp P02452 CO1A1_HUMAN    | 1.078085  | 1.9413493 |
| sp Q96PD5-2 PGRP2_HUMAN  | 1.0850658 | 1.6960104 |
| sp P11216 PYGB_HUMAN     | 1.088028  | 9.893875  |
| sp P42226 STAT6_HUMAN    | 1.0887871 | 1.6960104 |
| sp Q13228-4 SBP1_HUMAN   | 1.0916424 | 13.94599  |
| sp P12109 CO6A1_HUMAN    | 1.0953541 | 9.004438  |
| sp Q07960 RHG01_HUMAN    | 1.0968971 | 3.5908275 |
| sp P12110 CO6A2_HUMAN    | 1.1057243 | 9.449409  |
| sp P00325 ADH1B_HUMAN    | 1.1126595 | 4.509013  |
| sp O94979-10 SC31A_HUMAN | 1.1174173 | 1.5646582 |
| sp Q92878-2 RAD50_HUMAN  | 1.1181984 | 1.6960104 |
| sp Q08431 MFGM_HUMAN     | 1.1191597 | 2.1818786 |
| sp Q16647 PTGIS_HUMAN    | 1.119709  | 2.6576471 |
| sp Q15063-3 POSTN_HUMAN  | 1.1211491 | 9.449409  |
| sp P04792 HSPB1_HUMAN    | 1.126339  | 6.7698927 |
| sp P60981-2 DEST_HUMAN   | 1.1295681 | 2.6576471 |
| sp P36269-2 GGT5_HUMAN   | 1.1355    | 2.6576471 |
| sp Q13557-10 KCC2D_HUMAN | 1.1418533 | 3.5908275 |
| sp P22033 MUTA_HUMAN     | 1.1427498 | 1.6960104 |
| sp P50135 HNMT_HUMAN     | 1.1490746 | 1.6960104 |
| sp P01860 IGHG3_HUMAN    | 1.158184  | 2.6576471 |
| sp P22102 PUR2_HUMAN     | 1.1678371 | 2.1818786 |

|                         |            |           |
|-------------------------|------------|-----------|
| sp P48059-3 LIMS1_HUMAN | 1.1756592  | 2.1818786 |
| sp P15088 CBPA3_HUMAN   | 1.1990242  | 2.6576471 |
| sp P24844 MYL9_HUMAN    | 1.1996956  | 1.6960104 |
| sp Q15124 PGM5_HUMAN    | 1.2163506  | 9.004438  |
| sp O43175 SERA_HUMAN    | 1.2298946  | 4.051346  |
| sp P00740-2 FA9_HUMAN   | 1.2442608  | 2.6576471 |
| sp P35580 MYH10_HUMAN   | 1.2497044  | 15.35253  |
| sp A6NMZ7 CO6A6_HUMAN   | 1.2500267  | 9.449409  |
| sp P11766 ADHX_HUMAN    | 1.257534   | 6.7698927 |
| sp O43294 TGFI1_HUMAN   | 1.2634926  | 2.1818786 |
| sp P50225 ST1A1_HUMAN   | 1.2986374  | 1.6960104 |
| sp P15428-5 PGDH_HUMAN  | 1.3036098  | 1.6960104 |
| sp P08123 CO1A2_HUMAN   | 1.3178577  | 2.6576471 |
| sp P18206-2 VINC_HUMAN  | 1.321495   | 14.840647 |
| sp P01833 PIGR_HUMAN    | 1.3372192  | 5.417897  |
| sp Q13976 KGP1_HUMAN    | 1.3607788  | 3.1266599 |
| sp Q9UBX5 FBLN5_HUMAN   | 1.3765259  | 4.051346  |
| sp Q9NZU5 LMCD1_HUMAN   | 1.4248524  | 6.3204336 |
| sp Q9UMS6-2 SYNP2_HUMAN | 1.4356117  | 3.5908275 |
| sp P02794 FRIH_HUMAN    | 1.4457741  | 2.6576471 |
| sp P21291 CSRP1_HUMAN   | 1.4528923  | 4.964395  |
| sp Q15746-3 MYLK_HUMAN  | 1.4535484  | 10.781506 |
| sp Q9NR12-2 PDLI7_HUMAN | 1.4588127  | 3.5908275 |
| sp P02792 FRIL_HUMAN    | 1.4913712  | 3.1266599 |
| sp P07951 TPM2_HUMAN    | 1.507824   | 4.509013  |
| sp P51911 CNN1_HUMAN    | 1.5106812  | 4.964395  |
| sp P09493-9 TPM1_HUMAN  | 1.5158215  | 1.6960104 |
| sp P07951-3 TPM2_HUMAN  | 1.5393085  | 2.1818786 |
| sp P62736 ACTA_HUMAN    | 1.5403309  | 6.7698927 |
| sp Q05682 CALD1_HUMAN   | 1.5722351  | 2.1818786 |
| sp P09493-8 TPM1_HUMAN  | 1.5833015  | 3.1266599 |
| sp P21333-2 FLNA_HUMAN  | 1.5921688  | 13.651394 |
| sp P30837 AL1B1_HUMAN   | 1.6111813  | 2.6576471 |
| sp P17661 DESM_HUMAN    | 1.6647968  | 14.778499 |
| sp P02511 CRYAB_HUMAN   | 1.6936283  | 1.6960104 |
| sp P21266 GSTM3_HUMAN   | 1.7187538  | 4.509013  |
| sp P15090 FABP4_HUMAN   | 1.7299442  | 3.1266599 |
| sp Q01995 TAGL_HUMAN    | 1.9732094  | 8.57438   |
| sp P07451 CAH3_HUMAN    | 2.0863323  | 3.1266599 |
| sp Q04826 1B40_HUMAN    | -1.4876137 | 0.656254  |
| sp P13761 2B17_HUMAN    | -1.051136  | 0.656254  |
| sp P30453 1A34_HUMAN    | -0.8772936 | 0.656254  |
| sp Q16777 H2A2C_HUMAN   | -0.8654175 | 0.656254  |
| sp P08246 ELNE_HUMAN    | -0.7145748 | 1.1932944 |
| sp P49913 CAMP_HUMAN    | -0.4787922 | 1.1932944 |

|                         |            |            |
|-------------------------|------------|------------|
| sp P04908 H2A1B_HUMAN   | -0.474247  | 0.656254   |
| sp P25815 S100P_HUMAN   | -0.3963356 | 0.656254   |
| sp P41218 MNDA_HUMAN    | -0.3615398 | 0.06291623 |
| sp O60814 H2B1K_HUMAN   | -0.3188286 | 1.1932944  |
| sp P06899 H2B1J_HUMAN   | -0.2472229 | 1.1932944  |
| sp Q15109-10 RAGE_HUMAN | -0.1943436 | 0.84879977 |
| sp P59666 DEF3_HUMAN    | -0.1813583 | 0.06291623 |
| sp P05164-3 PERM_HUMAN  | -0.1524048 | 1.0261611  |
| sp P12821-2 ACE_HUMAN   | -0.136404  | 0.37060758 |
| sp P13760 2B14_HUMAN    | -0.0846424 | 0          |
| sp Q8TD06 AGR3_HUMAN    | -0.0843391 | 0          |
| sp P38159 RBMX_HUMAN    | -0.0822277 | 0.19149946 |
| sp P67809 YBOX1_HUMAN   | -0.046298  | 0          |
| sp Q92522 H1X_HUMAN     | -0.044035  | 0.19149946 |
| sp P31947-2 1433S_HUMAN | -0.0437183 | 0          |
| sp P80188 NGAL_HUMAN    | -0.028801  | 0.06986027 |
| sp P15559-3 NQO1_HUMAN  | -0.0219193 | 0.35795313 |
| sp P07339 CATD_HUMAN    | -0.0101357 | 0.31423286 |
| sp P20702 ITAX_HUMAN    | -0.0097542 | 0          |
| sp P19012-2 K1C15_HUMAN | 0.0097065  | 0          |
| sp P50897-2 PPT1_HUMAN  | 0.0137825  | 0.2178309  |
| sp P05109 S10A8_HUMAN   | 0.01556587 | 0.06842031 |
| sp P63218 GBG5_HUMAN    | 0.02409744 | 0.17319627 |
| sp P00738-2 HPT_HUMAN   | 0.02537537 | 0.22702569 |
| sp P23229-4 ITA6_HUMAN  | 0.02682686 | 0          |
| sp P20160 CAP7_HUMAN    | 0.04096222 | 0.2178309  |
| sp Q13938-4 CAYP1_HUMAN | 0.044384   | 0          |
| sp P06703 S10A6_HUMAN   | 0.0603714  | 0          |
| sp P18077 RL35A_HUMAN   | 0.06687164 | 0.19149946 |
| sp Q9UBR2 CATZ_HUMAN    | 0.06947517 | 0          |
| sp P84103-2 SRSF3_HUMAN | 0.07398224 | 0.7498006  |
| sp P02786 TFR1_HUMAN    | 0.07824516 | 0.08684197 |
| sp P24158 PRTN3_HUMAN   | 0.0791359  | 0.09894868 |
| sp P05534 1A24_HUMAN    | 0.08354759 | 0          |
| sp O95810 CAVN2_HUMAN   | 0.10145378 | 0.8059303  |
| sp P60903 S10AA_HUMAN   | 0.10464668 | 0          |
| sp P08729 K2C7_HUMAN    | 0.11673546 | 0.7021525  |
| sp P43353-2 AL3B1_HUMAN | 0.12232971 | 0          |
| sp Q13510-2 ASAH1_HUMAN | 0.12563515 | 0.99757636 |
| sp P13686 PPA5_HUMAN    | 0.13054085 | 0.2178309  |
| sp P31949 S10AB_HUMAN   | 0.13254929 | 0.48520416 |
| sp P13498 CY24A_HUMAN   | 0.13759995 | 0          |
| sp P25774 CATS_HUMAN    | 0.14257812 | 0          |
| sp P61626 LYSC_HUMAN    | 0.14291382 | 0.87291557 |
| sp Q14956-2 GPNMB_HUMAN | 0.14641953 | 0.45033538 |

|                         |            |            |
|-------------------------|------------|------------|
| sp Q14011 CIRBP_HUMAN   | 0.14945316 | 0.45033538 |
| sp Q9Y5S9-2 RBM8A_HUMA  | 0.15189743 | 0.7061832  |
| sp Q7Z3D6-3 GLUCM_HUMA  | 0.15275955 | 0          |
| sp P08174-3 DAF_HUMAN   | 0.15427208 | 0.2178309  |
| sp P00167-2 CYB5_HUMAN  | 0.15481949 | 0.7061832  |
| sp P02769 ALBU_BOVIN    | 0.16009903 | 0.24990007 |
| sp P16671-4 CD36_HUMAN  | 0.1610241  | 0.06291623 |
| sp P00739-2 HPTR_HUMAN  | 0.16213226 | 0.65625405 |
| sp P56134-3 ATPK_HUMAN  | 0.1723957  | 0          |
| sp P07858 CATB_HUMAN    | 0.17547989 | 1.0951192  |
| sp Q6P4A8 PLBL1_HUMAN   | 0.17871475 | 0.35795313 |
| sp Q9NPY3 C1QR1_HUMAN   | 0.17897224 | 0.40256184 |
| sp Q13247-3 SRSF6_HUMAN | 0.18217468 | 1.1932944  |
| sp P0C0S5 H2AZ_HUMAN    | 0.18300438 | 0.656254   |
| sp Q29865 1C18_HUMAN    | 0.18540955 | 0.7061832  |
| sp O00757 F16P2_HUMAN   | 0.19205475 | 0.45033538 |
| sp O75155 CAND2_HUMAN   | 0.19525146 | 0.656254   |
| sp P09429 HMGB1_HUMAN   | 0.19994736 | 0.19149946 |
| sp P28676 GRAN_HUMAN    | 0.20148468 | 1.0485198  |
| sp Q8WWI1-5 LMO7_HUMA   | 0.20188332 | 0.87291557 |
| sp Q13243-3 SRSF5_HUMAN | 0.20908928 | 0.45033538 |
| sp P04229 2B11_HUMAN    | 0.21119308 | 0.7827403  |
| sp P50895 BCAM_HUMAN    | 0.21408463 | 0.6615227  |
| sp Q9UM07 PADI4_HUMAN   | 0.21507263 | 0.7061832  |
| sp P30838 AL3A1_HUMAN   | 0.2169838  | 0.45033538 |
| sp P17213 BPI_HUMAN     | 0.21891785 | 0          |
| sp P14780 MMP9_HUMAN    | 0.22148705 | 0.56808305 |
| sp O95716 RAB3D_HUMAN   | 0.22312737 | 0          |
| sp P27487 DPP4_HUMAN    | 0.22627258 | 0.61034113 |
| sp P61604 CH10_HUMAN    | 0.22968102 | 0.5111962  |
| sp P11678 PERE_HUMAN    | 0.23331451 | 0          |
| sp Q53FA7 QORX_HUMAN    | 0.23898697 | 0.7827403  |
| sp P20340-2 RAB6A_HUMAN | 0.23914146 | 0.656254   |
| sp P04066 FUCO_HUMAN    | 0.24085236 | 0.45033538 |
| sp P13987-2 CD59_HUMAN  | 0.24890327 | 0.7827403  |
| sp P09758 TACD2_HUMAN   | 0.2506733  | 0.90036625 |
| sp P63220 RS21_HUMAN    | 0.25068283 | 0          |
| sp P62714 PP2AB_HUMAN   | 0.25229263 | 0.656254   |
| sp P50995-2 ANX11_HUMAN | 0.25307274 | 0.50298375 |
| sp P08727 K1C19_HUMAN   | 0.25334358 | 1.176857   |
| sp O43615 TIM44_HUMAN   | 0.25879383 | 0.45033538 |
| sp P09668 CATH_HUMAN    | 0.26002312 | 0.8744098  |
| sp Q32MZ4-3 LRRF1_HUMA  | 0.26161194 | 0.43633315 |
| sp P51991 ROA3_HUMAN    | 0.26214027 | 0          |
| sp Q01130-2 SRSF2_HUMAN | 0.26706314 | 1.1505735  |

|                         |            |            |
|-------------------------|------------|------------|
| sp P51153 RAB13_HUMAN   | 0.26712036 | 0          |
| sp Q15126 PMVK_HUMAN    | 0.26714897 | 0          |
| sp Q99729-2 ROAA_HUMAN  | 0.2721691  | 1.1505735  |
| sp Q03135-2 CAV1_HUMAN  | 0.27230835 | 0          |
| sp Q13231-2 CHIT1_HUMAN | 0.27311707 | 0.312067   |
| sp P06702 S10A9_HUMAN   | 0.27545166 | 0.2838047  |
| sp Q00839 HNRPU_HUMAN   | 0.2773819  | 1.1437052  |
| sp P49065 ALBU_RABBIT   | 0.27796936 | 0.656254   |
| sp P19525-2 E2AK2_HUMAN | 0.28163433 | 0          |
| sp P16070-16 CD44_HUMAN | 0.28239822 | 0.28516325 |
| sp Q9NZA1-2 CLIC5_HUMAN | 0.2824688  | 0.5283125  |
| sp Q01105-2 SET_HUMAN   | 0.2832489  | 1.1505735  |
| sp P07910-2 HNRPC_HUMAN | 0.28440285 | 1.0634323  |
| sp P12429 ANXA3_HUMAN   | 0.28470993 | 0.1806812  |
| sp P09651-3 ROA1_HUMAN  | 0.29624176 | 1.0634323  |
| sp Q6PIU2-2 NCEH1_HUMAN | 0.29768753 | 1.0634323  |
| sp P33151 CADH5_HUMAN   | 0.29821396 | 0.7061832  |
| sp Q8NBX0 SCPDL_HUMAN   | 0.30376434 | 1.0485198  |
| sp Q96HE7 ERO1A_HUMAN   | 0.30657768 | 0.5204253  |
| sp Q9BXM0 PRAX_HUMAN    | 0.31501007 | 0.7827403  |
| sp P51608 MECP2_HUMAN   | 0.3157196  | 1.1932944  |
| sp P78347-2 GTF2I_HUMAN | 0.31734276 | 0.45033538 |
| sp Q8TDL5 BPIB1_HUMAN   | 0.32038498 | 0.91272414 |
| sp P15153 RAC2_HUMAN    | 0.3247261  | 0.656254   |
| sp Q04837 SSBP_HUMAN    | 0.3252411  | 0.91601294 |
| sp O95994 AGR2_HUMAN    | 0.32761574 | 0.84879977 |
| sp P26447 S10A4_HUMAN   | 0.33115196 | 0.4075265  |
| sp P04440 DPB1_HUMAN    | 0.3342743  | 0.7827403  |
| sp P51571 SSRD_HUMAN    | 0.33458328 | 0.7061832  |
| sp P61769 B2MG_HUMAN    | 0.3362999  | 1.1932944  |
| sp Q96AP7 ESAM_HUMAN    | 0.33781433 | 0.7827403  |
| sp Q14533 KRT81_HUMAN   | 0.33873367 | 0.6070219  |
| sp Q02318 CP27A_HUMAN   | 0.34090614 | 1.1932944  |
| sp Q04941 PLP2_HUMAN    | 0.34344864 | 0          |
| sp Q15637-3 SF01_HUMAN  | 0.34493065 | 0.91601294 |
| sp Q8TC12-2 RDH11_HUMAN | 0.34661674 | 1.1932944  |
| sp P62750 RL23A_HUMAN   | 0.34663963 | 0.45033538 |
| sp O14672 ADA10_HUMAN   | 0.35002136 | 0.7827403  |
| sp P15311 EZRI_HUMAN    | 0.35158157 | 0.19134797 |
| sp Q9NZN3 EHD3_HUMAN    | 0.3562889  | 0.35795313 |
| sp Q10589-2 BST2_HUMAN  | 0.35751343 | 1.1932944  |
| sp P0DOX2 IGA2_HUMAN    | 0.3704605  | 0.45033538 |
| sp O75521-2 ECI2_HUMAN  | 0.3719349  | 0.312067   |
| sp Q9UHL4 DPP2_HUMAN    | 0.37213135 | 0.84879977 |
| sp P01920 DQB1_HUMAN    | 0.37278366 | 0          |

|                         |            |            |
|-------------------------|------------|------------|
| sp P30491 1B53_HUMAN    | 0.37434387 | 0          |
| sp O60234 GMFG_HUMAN    | 0.37455177 | 0.7498006  |
| sp Q13404 UB2V1_HUMAN   | 0.37505913 | 0.7827403  |
| sp P06753 TPM3_HUMAN    | 0.38567162 | 0.656254   |
| sp P07355 ANXA2_HUMAN   | 0.38676834 | 0.3761346  |
| sp P11279 LAMP1_HUMAN   | 0.3891449  | 1.1932944  |
| sp P05387 RLA2_HUMAN    | 0.39034462 | 1.1932944  |
| sp P48960-2 CD97_HUMAN  | 0.39170647 | 1.1932944  |
| sp P84090 ERH_HUMAN     | 0.39402962 | 1.1505735  |
| sp Q9BRF8 CPPED_HUMAN   | 0.39995956 | 0          |
| sp P35637-2 FUS_HUMAN   | 0.40268135 | 1.1932944  |
| sp Q16787-3 LAMA3_HUMA  | 0.41191292 | 1.1932944  |
| sp Q9UBQ0-2 VPS29_HUMA  | 0.4141426  | 1.1932944  |
| sp P55036-2 PSMD4_HUMAI | 0.4168434  | 0.6070219  |
| sp P09493-5 TPM1_HUMAN  | 0.4172058  | 1.1932944  |
| sp P30626-2 SORCN_HUMAI | 0.41797256 | 0.95332193 |
| sp O43760-2 SNG2_HUMAN  | 0.41817093 | 0.7827403  |
| sp Q15599-2 NHRF2_HUMAI | 0.41820908 | 0.8983557  |
| sp P17931 LEG3_HUMAN    | 0.41942787 | 1.0485198  |
| sp P62244 RS15A_HUMAN   | 0.4208603  | 1.1932944  |
| sp Q96EE3-1 SEH1_HUMAN  | 0.42388725 | 1.1932944  |
| sp O95837 GNA14_HUMAN   | 0.42650795 | 0.656254   |
| sp P08842 STS_HUMAN     | 0.42654228 | 1.1932944  |
| sp Q8WXH0-2 SYNE2_HUMAF | 0.42879105 | 1.1932944  |
| sp O75348 VATG1_HUMAN   | 0.4313755  | 0.7061832  |
| sp P55196-5 AFAD_HUMAN  | 0.43245125 | 1.0485198  |
| sp Q16762 THTR_HUMAN    | 0.43327332 | 0.69308156 |
| sp Q9HB40 RISC_HUMAN    | 0.43755722 | 1.1932944  |
| sp P04083 ANXA1_HUMAN   | 0.43992233 | 0.40707567 |
| sp Q8TCJ2 STT3B_HUMAN   | 0.4431076  | 1.1932944  |
| sp Q02878 RL6_HUMAN     | 0.44394302 | 1.1932944  |
| sp P08397-2 HEM3_HUMAN  | 0.44452667 | 1.1505735  |
| sp P54819-2 KAD2_HUMAN  | 0.44586182 | 1.0485198  |
| sp Q9NV96-3 CC50A_HUMAI | 0.4459648  | 0.656254   |
| sp Q9H6R3 ACSS3_HUMAN   | 0.4465027  | 0          |
| sp P29692 EF1D_HUMAN    | 0.44779015 | 0.656254   |
| sp Q9BUQ8 DDX23_HUMAN   | 0.44909286 | 1.1932944  |
| sp Q99584 S10AD_HUMAN   | 0.4504013  | 0.7827403  |
| sp Q15836 VAMP3_HUMAN   | 0.45145988 | 0.656254   |
| sp Q08170 SRSF4_HUMAN   | 0.45340347 | 0.656254   |
| sp Q8N5K1 CISD2_HUMAN   | 0.45360184 | 1.1932944  |
| sp Q9P0J0-2 NDUAD_HUMA  | 0.45449448 | 0.45033538 |
| sp O75475 PSIP1_HUMAN   | 0.45614433 | 0.656254   |
| sp P14678 RSMB_HUMAN    | 0.4583912  | 1.1932944  |
| sp P11166 GTR1_HUMAN    | 0.45980072 | 1.1932944  |

|                         |            |            |
|-------------------------|------------|------------|
| sp A0A0B4J1X8 HV343_HUM | 0.46011543 | 0.656254   |
| sp P01911 2B1F_HUMAN    | 0.4601841  | 0.656254   |
| sp Q9Y2Q3-3 GSTK1_HUMA  | 0.46051788 | 0.6298893  |
| sp P01111 RASN_HUMAN    | 0.46559906 | 0.656254   |
| sp O15173-2 PGRC2_HUMA  | 0.46579742 | 0.97209185 |
| sp P62314 SMD1_HUMAN    | 0.46695423 | 1.1932944  |
| sp P19404 NDUV2_HUMAN   | 0.4676075  | 1.1932944  |
| sp P62995-3 TRA2B_HUMAN | 0.46874046 | 1.1932944  |
| sp Q15286-2 RAB35_HUMA  | 0.46902466 | 0.656254   |
| sp Q15056-2 IF4H_HUMAN  | 0.46928024 | 1.1932944  |
| sp Q9P265 DIP2B_HUMAN   | 0.4708004  | 0.656254   |
| sp P37235 HPCL1_HUMAN   | 0.47247887 | 0.656254   |
| sp Q9BXP5-5 SRRT_HUMAN  | 0.47322273 | 1.1276597  |
| sp P55290-4 CAD13_HUMAN | 0.4733162  | 1.1505735  |
| sp P00403 COX2_HUMAN    | 0.47634315 | 1.1932944  |
| sp P07948-2 LYN_HUMAN   | 0.47743034 | 0.656254   |
| sp O75608-2 LYPA1_HUMAN | 0.4804325  | 0.45033538 |
| sp P62857 RS28_HUMAN    | 0.48050117 | 0.8983557  |
| sp O75964 ATP5L_HUMAN   | 0.4831581  | 1.1932944  |
| sp Q92506 DHB8_HUMAN    | 0.48324966 | 1.1932944  |
| sp P14317 HCLS1_HUMAN   | 0.48557472 | 0.45033538 |
| sp Q92734-2 TFG_HUMAN   | 0.48635292 | 1.1932944  |
| sp P10523 ARRS_HUMAN    | 0.48970795 | 0.656254   |
| sp Q53H82 LACB2_HUMAN   | 0.49230766 | 1.1932944  |
| sp O43684-2 BUB3_HUMAN  | 0.4934044  | 1.1932944  |
| sp P51636-2 CAV2_HUMAN  | 0.49692535 | 1.1932944  |
| sp P40121 CAPG_HUMAN    | 0.4970169  | 0.3761346  |
| sp Q9HD89 RETN_HUMAN    | 0.5024071  | 0.45033538 |
| sp Q96I15 SCLY_HUMAN    | 0.5027561  | 1.1932944  |
| sp Q9Y2Q5 LTOR2_HUMAN   | 0.50442886 | 1.1932944  |
| sp P01116-2 RASK_HUMAN  | 0.50701904 | 1.1932944  |
| sp P62070-4 RRAS2_HUMAN | 0.5107155  | 0.656254   |
| sp Q92930 RAB8B_HUMAN   | 0.51340675 | 0.656254   |
| sp P61960 UFM1_HUMAN    | 0.51428604 | 1.1932944  |
| sp P06396-2 GELS_HUMAN  | 0.5160389  | 0.656254   |
| sp Q6IBS0 TWF2_HUMAN    | 0.51651955 | 0.19149946 |
| sp O15254-2 ACOX3_HUMA  | 0.51727486 | 0.656254   |
| sp Q9NVJ2 ARL8B_HUMAN   | 0.5178566  | 1.1932944  |
| sp Q8IY17-3 PLPL6_HUMAN | 0.5185852  | 1.1932944  |
| sp P36957 ODO2_HUMAN    | 0.51966286 | 1.1932944  |
| sp Q9BW30 TPPP3_HUMAN   | 0.5212097  | 0.29066643 |
| sp P49458 SRP09_HUMAN   | 0.52254295 | 1.1932944  |
| sp Q6KB66-2 K2C80_HUMAN | 0.52539825 | 0.656254   |
| sp P01591 IGJ_HUMAN     | 0.5275364  | 0.7827403  |
| sp Q7Z7H5-3 TMED4_HUMA  | 0.52957535 | 0.656254   |

|                         |            |            |
|-------------------------|------------|------------|
| sp Q13232 NDK3_HUMAN    | 0.5342388  | 1.1932944  |
| sp Q9BVK6 TMED9_HUMAN   | 0.5347805  | 1.1932944  |
| sp P22234-2 PUR6_HUMAN  | 0.53845215 | 1.2095301  |
| sp Q96M27-3 PRRC1_HUMA  | 0.54123306 | 1.1932944  |
| sp P31689 DNJA1_HUMAN   | 0.5415535  | 1.1505735  |
| sp Q16539-2 MK14_HUMAN  | 0.54169464 | 1.0301651  |
| sp P62942 FKB1A_HUMAN   | 0.5425434  | 0.656254   |
| sp O95197-2 RTN3_HUMAN  | 0.54299545 | 1.1932944  |
| sp Q9P2M7 CING_HUMAN    | 0.5438309  | 1.0485198  |
| sp P51858 HDGF_HUMAN    | 0.5444145  | 0.656254   |
| sp P62277 RS13_HUMAN    | 0.5452194  | 1.1932944  |
| sp P55010 IF5_HUMAN     | 0.54559517 | 1.1932944  |
| sp Q9UJZ1-2 STML2_HUMAI | 0.5472374  | 1.1932944  |
| sp Q9H845 ACAD9_HUMAN   | 0.5495472  | 1.1932944  |
| sp P12236 ADT3_HUMAN    | 0.54964066 | 1.1932944  |
| sp Q5JTV8-3 TOIP1_HUMAN | 0.55038834 | 0.8983557  |
| sp P32969 RL9_HUMAN     | 0.5513954  | 0.91601294 |
| sp Q9NPJ3-2 ACO13_HUMAI | 0.55184555 | 1.1932944  |
| sp P51553-2 IDH3G_HUMAN | 0.55221176 | 1.1932944  |
| sp P30443 1A01_HUMAN    | 0.5534859  | 1.1932944  |
| sp Q9P2X0-2 DPM3_HUMAN  | 0.5579319  | 1.1932944  |
| sp P62318-2 SMD3_HUMAN  | 0.5580044  | 1.1932944  |
| sp Q9Y3B3 TMED7_HUMAN   | 0.5594883  | 1.1932944  |
| sp P09496-2 CLCA_HUMAN  | 0.5596638  | 1.0301651  |
| sp P62854 RS26_HUMAN    | 0.560318   | 1.1932944  |
| sp P20810-10 ICAL_HUMAN | 0.5630512  | 1.1505735  |
| sp Q9H2U2-2 IPYR2_HUMAN | 0.5653248  | 1.1932944  |
| sp P61956-2 SUMO2_HUMA  | 0.5662823  | 0.656254   |
| sp O14791-2 APOL1_HUMAI | 0.5674267  | 1.1932944  |
| sp P36551 HEM6_HUMAN    | 0.5681     | 1.2941489  |
| sp Q8NFW8 NEUA_HUMAN    | 0.56993866 | 1.1932944  |
| sp Q9Y6E0 STK24_HUMAN   | 0.5727682  | 0.7827403  |
| sp P50452 SPB8_HUMAN    | 0.572958   | 0.45033538 |
| sp Q9BPW8 NIPS1_HUMAN   | 0.5781269  | 1.1932944  |
| sp P20674 COX5A_HUMAN   | 0.5853214  | 1.1932944  |
| sp P49721 PSB2_HUMAN    | 0.58596134 | 0.656254   |
| sp P23083 HV102_HUMAN   | 0.5865898  | 0.656254   |
| sp P18085 ARF4_HUMAN    | 0.5873604  | 1.1932944  |
| sp Q04695 K1C17_HUMAN   | 0.5876236  | 0.656254   |
| sp Q15369-2 ELOC_HUMAN  | 0.5876293  | 1.1932944  |
| sp P28074 PSB5_HUMAN    | 0.5937538  | 1.1932944  |
| sp Q9Y3C8 UFC1_HUMAN    | 0.5951519  | 1.1932944  |
| sp P61923-5 COPZ1_HUMAN | 0.5953598  | 1.1932944  |
| sp Q96RF0-2 SNX18_HUMAI | 0.59975624 | 1.1932944  |
| sp Q3KQV9 UAP1L_HUMAN   | 0.599802   | 0          |



|                           |            |            |
|---------------------------|------------|------------|
| sp P60891 PRPS1_HUMAN     | 0.6030712  | 1.1932944  |
| sp P51570-2 GALK1_HUMAN   | 0.6034584  | 1.1932944  |
| sp Q6P1N9 TATD1_HUMAN     | 0.6061115  | 1.1932944  |
| sp A0A0C4DH25 KVD20_HUMAN | 0.60806084 | 0.656254   |
| sp Q9NX46 ARHL2_HUMAN     | 0.60928726 | 1.1932944  |
| sp P21283 VATC1_HUMAN     | 0.6093693  | 1.1932944  |
| sp P61026 RAB10_HUMAN     | 0.61037064 | 0.656254   |
| sp P10316 1A69_HUMAN      | 0.6112137  | 0.656254   |
| sp Q00013-2 EM55_HUMAN    | 0.61153793 | 1.1932944  |
| sp P05452 TETN_HUMAN      | 0.6115608  | 0.91601294 |
| sp P02753 RET4_HUMAN      | 0.61257744 | 1.1932944  |
| sp Q9H3H3-1 CK068_HUMAN   | 0.6128807  | 1.1932944  |
| sp Q9Y2J2-4 E41L3_HUMAN   | 0.61511993 | 0.656254   |
| sp P49902-2 5NTC_HUMAN    | 0.6158638  | 1.1932944  |
| sp Q9BXS5-2 AP1M1_HUMAN   | 0.61652756 | 1.1932944  |
| sp Q9Y295 DRG1_HUMAN      | 0.6189785  | 1.1932944  |
| sp A0A0C4DH38 HV551_HUMAN | 0.61961555 | 1.1932944  |
| sp P63261 ACTG_HUMAN      | 0.6199379  | 0.656254   |
| sp P55265-5 DSRAD_HUMAN   | 0.6207695  | 1.1932944  |
| sp Q9Y285 SYFA_HUMAN      | 0.62078667 | 0.656254   |
| sp Q15005 SPCS2_HUMAN     | 0.62192726 | 1.1932944  |
| sp Q9H4G4 GAPR1_HUMAN     | 0.62293625 | 1.1932944  |
| sp P35542 SAA4_HUMAN      | 0.6236267  | 1.1932944  |
| sp O43681 ASNA_HUMAN      | 0.62449837 | 1.1932944  |
| sp O00560-2 SDCB1_HUMAN   | 0.6249485  | 1.1932944  |
| sp P13284 GILT_HUMAN      | 0.62683487 | 0.7827403  |
| sp P61225 RAP2B_HUMAN     | 0.6268444  | 1.1932944  |
| sp Q10713-2 MPPA_HUMAN    | 0.6283722  | 1.1932944  |
| sp Q9UQ80 PA2G4_HUMAN     | 0.6287041  | 0.656254   |
| sp Q9Y2X3 NOP58_HUMAN     | 0.62921715 | 1.1932944  |
| sp P24557-2 THAS_HUMAN    | 0.6293678  | 1.1932944  |
| sp P0DOX7 IGK_HUMAN       | 0.6317749  | 1.1932944  |
| sp P08779 K1C16_HUMAN     | 0.6328869  | 0.656254   |
| sp P49756 RBM25_HUMAN     | 0.634634   | 1.1932944  |
| sp Q92973-2 TNPO1_HUMAN   | 0.6348038  | 1.0301651  |
| sp P61088 UBE2N_HUMAN     | 0.6380787  | 0.656254   |
| sp Q96N66-3 MBOA7_HUMAN   | 0.63886833 | 1.1932944  |
| sp Q16204 CCDC6_HUMAN     | 0.6397228  | 1.1932944  |
| sp P68371 TBB4B_HUMAN     | 0.6403332  | 0.19149946 |
| sp O00478-2 BT3A3_HUMAN   | 0.6405239  | 1.1932944  |
| sp P60033 CD81_HUMAN      | 0.64128876 | 1.1932944  |
| sp P13746 1A11_HUMAN      | 0.64155006 | 1.1932944  |
| sp P62851 RS25_HUMAN      | 0.6419411  | 1.1932944  |
| sp P14866 HNRPL_HUMAN     | 0.64264107 | 1.2095301  |
| sp P62888 RL30_HUMAN      | 0.6429901  | 1.1932944  |

|                         |            |           |
|-------------------------|------------|-----------|
| sp Q8TCS8 PNPT1_HUMAN   | 0.64411163 | 1.1932944 |
| sp P31946 1433B_HUMAN   | 0.64465904 | 0.656254  |
| sp O95573 ACSL3_HUMAN   | 0.64756966 | 0.656254  |
| sp Q9H9B4 SFXN1_HUMAN   | 0.6479492  | 1.1932944 |
| sp P68036-3 UB2L3_HUMAN | 0.6481266  | 1.1932944 |
| sp Q8IWB7 WDFY1_HUMAN   | 0.64865685 | 1.1932944 |
| sp P43307 SSRA_HUMAN    | 0.65036964 | 1.1932944 |
| sp O15498-2 YKT6_HUMAN  | 0.6506462  | 1.1932944 |
| sp P61457 PHS_HUMAN     | 0.65078926 | 1.1932944 |
| sp P42025 ACTY_HUMAN    | 0.651474   | 1.1932944 |
| sp Q96A33-2 CCD47_HUMAN | 0.65252876 | 1.1932944 |
| sp P12694-2 ODBA_HUMAN  | 0.65256214 | 1.1932944 |
| sp P02533 K1C14_HUMAN   | 0.65488243 | 0.656254  |
| sp P54725-2 RD23A_HUMAN | 0.65496063 | 1.1932944 |
| sp P62834 RAP1A_HUMAN   | 0.65579605 | 0.656254  |
| sp Q96EM0 T3HPD_HUMAN   | 0.6598568  | 1.1932944 |
| sp Q14118 DAG1_HUMAN    | 0.6616478  | 1.1932944 |
| sp Q9NUJ1 ABHDA_HUMAN   | 0.66171455 | 1.1932944 |
| sp P00748 FA12_HUMAN    | 0.6624279  | 1.1932944 |
| sp P01780 HV307_HUMAN   | 0.66438293 | 0.656254  |
| sp Q9UJW0-3 DCTN4_HUMAN | 0.6646404  | 1.1932944 |
| sp Q9H0E2 TOLIP_HUMAN   | 0.6647701  | 1.1932944 |
| sp Q53EL6-2 PDCD4_HUMAN | 0.6664963  | 1.1932944 |
| sp P16298-2 PP2BB_HUMAN | 0.6688118  | 0.656254  |
| sp Q9H3K6-2 BOLA2_HUMAN | 0.66983414 | 0.656254  |
| sp P17612 KAPCA_HUMAN   | 0.670208   | 0.656254  |
| sp Q969X5 ERGI1_HUMAN   | 0.673172   | 1.1932944 |
| sp Q8TD19 NEK9_HUMAN    | 0.6732006  | 1.1932944 |
| sp P09543-2 CN37_HUMAN  | 0.67383194 | 0.7588735 |
| sp Q92890-1 UFD1_HUMAN  | 0.6748562  | 1.1932944 |
| sp P02795 MT2_HUMAN     | 0.67773056 | 1.1932944 |
| sp Q96IU4 ABHEB_HUMAN   | 0.67941666 | 1.1932944 |
| sp Q15185-3 TEBP_HUMAN  | 0.68019104 | 1.1932944 |
| sp Q13435 SF3B2_HUMAN   | 0.6816368  | 1.1932944 |
| sp Q08209-2 PP2BA_HUMAN | 0.68177986 | 0.656254  |
| sp P39023 RL3_HUMAN     | 0.6840725  | 1.1932944 |
| sp Q92552-2 RT27_HUMAN  | 0.68481636 | 1.1932944 |
| sp Q13596-2 SNX1_HUMAN  | 0.68639755 | 0.656254  |
| sp P46779-2 RL28_HUMAN  | 0.6864166  | 1.1932944 |
| sp P61006 RAB8A_HUMAN   | 0.68741417 | 0.656254  |
| sp Q7Z6Z7-2 HUWE1_HUMAN | 0.6887207  | 1.1932944 |
| sp Q9Y570-2 PPME1_HUMAN | 0.69023705 | 1.1932944 |
| sp P06310 KV230_HUMAN   | 0.69052696 | 0.656254  |
| sp PODJI8 SAA1_HUMAN    | 0.69184685 | 0.656254  |
| sp Q9H9G7-2 AGO3_HUMAN  | 0.69249344 | 1.1932944 |

|                          |            |           |
|--------------------------|------------|-----------|
| sp Q96FV2-2 SCRN2_HUMAN  | 0.69282913 | 1.1932944 |
| sp P54578-2 UBP14_HUMAN  | 0.6934681  | 1.1932944 |
| sp P04839 CY24B_HUMAN    | 0.694252   | 1.1932944 |
| sp Q99436 PSB7_HUMAN     | 0.6961994  | 1.1505735 |
| sp A0MZ66-5 SHOT1_HUMAN  | 0.6970558  | 1.1932944 |
| sp O43148-2 MCES_HUMAN   | 0.69890594 | 1.1932944 |
| sp P62495-2 ERF1_HUMAN   | 0.69942665 | 1.1932944 |
| sp Q13438-4 OS9_HUMAN    | 0.6994343  | 1.1932944 |
| sp Q9Y6B6 SAR1B_HUMAN    | 0.70047    | 1.1932944 |
| sp P0CG39 POTEJ_HUMAN    | 0.7012863  | 0.656254  |
| sp P33316 DUT_HUMAN      | 0.7018566  | 1.1932944 |
| sp P62633-3 CNBP_HUMAN   | 0.7019348  | 1.1932944 |
| sp Q92688-2 AN32B_HUMAN  | 0.7023716  | 1.1932944 |
| sp P11498 PYC_HUMAN      | 0.7043648  | 0.6070219 |
| sp Q04206-3 TF65_HUMAN   | 0.70454025 | 1.1932944 |
| sp P58546 MTPN_HUMAN     | 0.70586777 | 1.1932944 |
| sp O15296 LX15B_HUMAN    | 0.70641327 | 1.1932944 |
| sp P48506 GSH1_HUMAN     | 0.70656204 | 1.1932944 |
| sp Q6UW68 TM205_HUMAN    | 0.7084274  | 1.1932944 |
| sp Q96EP5-2 DAZP1_HUMAN  | 0.7116585  | 1.1932944 |
| sp Q9H8L6 MMRN2_HUMAN    | 0.7150326  | 1.1932944 |
| sp P55854-2 SUMO3_HUMAN  | 0.71567154 | 0.656254  |
| sp P01782 HV309_HUMAN    | 0.71816635 | 0.656254  |
| sp Q86UP2-4 KTN1_HUMAN   | 0.71948624 | 1.1932944 |
| sp P61018 RAB4B_HUMAN    | 0.72076035 | 1.1932944 |
| sp Q9TQE0 2B19_HUMAN     | 0.7211914  | 0.656254  |
| sp Q86TX2 ACOT1_HUMAN    | 0.7248993  | 1.1932944 |
| sp Q9BVG4 PBDC1_HUMAN    | 0.725605   | 1.1932944 |
| sp P29992 GNA11_HUMAN    | 0.7276535  | 1.1932944 |
| sp Q8WXF7-2 ATLA1_HUMAN  | 0.72774124 | 1.1932944 |
| sp Q9H3U1-2 UN45A_HUMAN  | 0.72802544 | 1.1932944 |
| sp O94875-11 SRBS2_HUMAN | 0.7284603  | 0.656254  |
| sp P50440-3 GATM_HUMAN   | 0.72942734 | 1.1932944 |
| sp P06744 G6PI_HUMAN     | 0.7312832  | 0.656254  |
| sp P20338 RAB4A_HUMAN    | 0.7321396  | 0.656254  |
| sp O94804 STK10_HUMAN    | 0.73238754 | 0.656254  |
| sp P62249 RS16_HUMAN     | 0.73316    | 1.1932944 |
| sp P07360 CO8G_HUMAN     | 0.7342205  | 1.1932944 |
| sp Q96FW1 OTUB1_HUMAN    | 0.7347622  | 1.1932944 |
| sp Q09028-3 RBBP4_HUMAN  | 0.7352333  | 0.656254  |
| sp Q6PCB0 VWA1_HUMAN     | 0.7358837  | 1.1932944 |
| sp Q13547 HDAC1_HUMAN    | 0.73594093 | 0.656254  |
| sp Q08379 GOGA2_HUMAN    | 0.73612976 | 1.1932944 |
| sp P0COL5 CO4B_HUMAN     | 0.7366562  | 0.656254  |
| sp P61081 UBC12_HUMAN    | 0.7367668  | 1.1932944 |

|                           |            |           |
|---------------------------|------------|-----------|
| sp O94925-3 GLSK_HUMAN    | 0.73726654 | 1.1932944 |
| sp P60709 ACTB_HUMAN      | 0.73775864 | 0.656254  |
| sp Q9Y4D7-2 PLXD1_HUMAN   | 0.7397995  | 1.1932944 |
| sp A0A075B6P5 KV228_HUMAN | 0.74038696 | 0.656254  |
| sp Q02083-2 NAAA_HUMAN    | 0.7423096  | 1.1932944 |
| sp Q9NR19-2 ACSA_HUMAN    | 0.74518013 | 1.1932944 |
| sp Q2TAY7 SMU1_HUMAN      | 0.7455864  | 1.1932944 |
| sp P61224 RAP1B_HUMAN     | 0.7468672  | 0.656254  |
| sp O00468-7 AGRIN_HUMAN   | 0.7473583  | 1.1932944 |
| sp Q96HD1-2 CREL1_HUMAN   | 0.74762917 | 1.1932944 |
| sp P51452-2 DUS3_HUMAN    | 0.7479782  | 1.1932944 |
| sp Q9Y5Z4-2 HEBP2_HUMAN   | 0.7482872  | 1.1932944 |
| sp Q8TDZ2-4 MICA1_HUMAN   | 0.7483158  | 1.1932944 |
| sp Q6UW02 CP20A_HUMAN     | 0.74832535 | 1.1932944 |
| sp P63027 VAMP2_HUMAN     | 0.74852943 | 0.656254  |
| sp O60271-5 JIP4_HUMAN    | 0.74874115 | 1.1932944 |
| sp Q05682-4 CALD1_HUMAN   | 0.7496891  | 0.656254  |
| sp P17301 ITA2_HUMAN      | 0.75076294 | 1.1932944 |
| sp Q8WYA6-2 CTBL1_HUMAN   | 0.75135994 | 1.1932944 |
| sp P62304 RUXE_HUMAN      | 0.7514     | 1.1932944 |
| sp P01743 HV146_HUMAN     | 0.751915   | 1.1932944 |
| sp P46736-3 BRCC3_HUMAN   | 0.7541504  | 1.1932944 |
| sp P12235 ADT1_HUMAN      | 0.75834656 | 0.656254  |
| sp Q8NHP8 PLBL2_HUMAN     | 0.7588997  | 1.1932944 |
| sp P36542-2 ATPG_HUMAN    | 0.7631407  | 0.656254  |
| sp P14207 FOLR2_HUMAN     | 0.7633734  | 1.1932944 |
| sp O95425-4 SVIL_HUMAN    | 0.76340866 | 1.1932944 |
| sp Q00169 PIPNA_HUMAN     | 0.7669487  | 1.1932944 |
| sp O15260-2 SURF4_HUMAN   | 0.7670641  | 1.1932944 |
| sp Q9UHD8-3 SEPT9_HUMAN   | 0.76779366 | 1.1932944 |
| sp P36873-2 PP1G_HUMAN    | 0.7694988  | 1.1932944 |
| sp O76003 GLRX3_HUMAN     | 0.7695217  | 0.656254  |
| sp Q99961-2 SH3G1_HUMAN   | 0.7696972  | 1.1932944 |
| sp A0A0C4DH31 HV118_HUMAN | 0.770689   | 0.656254  |
| sp P49959-3 MRE11_HUMAN   | 0.7722473  | 1.1932944 |
| sp P31513 FMO3_HUMAN      | 0.7733917  | 1.1932944 |
| sp Q30134 2B18_HUMAN      | 0.7744179  | 0.656254  |
| sp Q9NY15 STAB1_HUMAN     | 0.77443695 | 1.1932944 |
| sp Q99459 CDC5L_HUMAN     | 0.7797966  | 1.1932944 |
| sp Q92820 GGH_HUMAN       | 0.7808037  | 1.1932944 |
| sp P63279 UBC9_HUMAN      | 0.78323174 | 1.1932944 |
| sp P50238 CRIP1_HUMAN     | 0.7851219  | 1.1932944 |
| sp Q15370-2 ELOB_HUMAN    | 0.7864914  | 0.656254  |
| sp P15374 UCHL3_HUMAN     | 0.78738594 | 1.1932944 |
| sp O43396 TXNL1_HUMAN     | 0.78972435 | 1.1932944 |

|                         |            |           |
|-------------------------|------------|-----------|
| sp Q16576-2 RBBP7_HUMAN | 0.79021454 | 0.656254  |
| sp Q9NP79 VTA1_HUMAN    | 0.79022217 | 1.1932944 |
| sp Q15149-9 PLEC_HUMAN  | 0.7914486  | 0.656254  |
| sp Q9Y3A3-3 PHOCN_HUMAN | 0.79164505 | 1.1932944 |
| sp P49903-2 SPS1_HUMAN  | 0.7922878  | 1.1932944 |
| sp Q9NT62-2 ATG3_HUMAN  | 0.7925377  | 1.1932944 |
| sp P0DP03 HV335_HUMAN   | 0.79343224 | 1.1932944 |
| sp O43252 PAPS1_HUMAN   | 0.79576874 | 1.1932944 |
| sp Q09161 NCBP1_HUMAN   | 0.79621506 | 1.1932944 |
| sp P41240 CSK_HUMAN     | 0.79632187 | 1.1932944 |
| sp Q92747 ARC1A_HUMAN   | 0.7965641  | 0.656254  |
| sp Q9NR31 SAR1A_HUMAN   | 0.7975445  | 1.1932944 |
| sp P31937 3HIDH_HUMAN   | 0.79896164 | 1.1932944 |
| sp P22894 MMP8_HUMAN    | 0.79927444 | 1.1932944 |
| sp P48426-2 PI42A_HUMAN | 0.80029106 | 1.1932944 |
| sp O14617-4 AP3D1_HUMAN | 0.8008089  | 1.1932944 |
| sp A1L4H1 SRCRL_HUMAN   | 0.8047104  | 1.1932944 |
| sp P63151-2 2ABA_HUMAN  | 0.8072376  | 0.656254  |
| sp O95352 ATG7_HUMAN    | 0.8084316  | 1.1932944 |
| sp Q9NZL9-2 MAT2B_HUMAN | 0.80884933 | 1.1932944 |
| sp P53990-2 IST1_HUMAN  | 0.8088913  | 1.1932944 |
| sp P36542 ATPG_HUMAN    | 0.8100624  | 0.656254  |
| sp Q9P0K7-2 RAI14_HUMAN | 0.81085587 | 1.1932944 |
| sp Q5TFE4 NT5D1_HUMAN   | 0.8114624  | 1.1932944 |
| sp Q96P70 IPO9_HUMAN    | 0.81471825 | 1.1932944 |
| sp Q96S97 MYADM_HUMAN   | 0.8153534  | 1.1932944 |
| sp P79483 DRB3_HUMAN    | 0.81637    | 0.656254  |
| sp Q02952-2 AKA12_HUMAN | 0.81741905 | 1.1932944 |
| sp O60488-2 ACSL4_HUMAN | 0.8189888  | 0.656254  |
| sp Q9BV20 MTNA_HUMAN    | 0.8198509  | 1.1932944 |
| sp P02746 C1QB_HUMAN    | 0.8229885  | 1.1932944 |
| sp Q9UNS2 CSN3_HUMAN    | 0.82387733 | 0.656254  |
| sp P01624 KV315_HUMAN   | 0.82536507 | 1.1932944 |
| sp P54886-2 P5CS_HUMAN  | 0.8268013  | 1.1932944 |
| sp Q96RU3-3 FNBP1_HUMAN | 0.82912064 | 1.1932944 |
| sp Q16527 CSR2_HUMAN    | 0.8297291  | 1.1932944 |
| sp Q15172-2 2A5A_HUMAN  | 0.83234596 | 1.1932944 |
| sp Q15642-3 CIP4_HUMAN  | 0.83239937 | 0.656254  |
| sp Q13505-3 MTX1_HUMAN  | 0.8339186  | 1.1932944 |
| sp P01619 KV320_HUMAN   | 0.8357887  | 0.656254  |
| sp P23142-4 FBLN1_HUMAN | 0.836113   | 1.1932944 |
| sp P57737-4 CORO7_HUMAN | 0.8370342  | 1.1932944 |
| sp O60825-2 F262_HUMAN  | 0.84105873 | 0.656254  |
| sp P02747 C1QC_HUMAN    | 0.84189034 | 1.1932944 |
| sp Q68EM7-2 RHG17_HUMAN | 0.84300995 | 1.1932944 |

|                         |            |           |
|-------------------------|------------|-----------|
| sp Q13555-7 KCC2G_HUMAN | 0.84500504 | 0.656254  |
| sp Q96BM9 ARL8A_HUMAN   | 0.8462162  | 0.656254  |
| sp Q9BU23-3 LMF2_HUMAN  | 0.8479748  | 1.1932944 |
| sp P30419-2 NMT1_HUMAN  | 0.8483448  | 1.1932944 |
| sp P20292 AL5AP_HUMAN   | 0.84898853 | 0.7827403 |
| sp P54619-2 AAKG1_HUMAN | 0.85053253 | 1.1932944 |
| sp Q8TE77-3 SSH3_HUMAN  | 0.8508854  | 1.1932944 |
| sp O75688 PPM1B_HUMAN   | 0.8510399  | 1.1932944 |
| sp P22352 GPX3_HUMAN    | 0.8517246  | 1.1932944 |
| sp P02751-15 FINC_HUMAN | 0.85287094 | 0.656254  |
| sp Q99538-2 LGMN_HUMAN  | 0.85765076 | 1.1932944 |
| sp O00487 PSDE_HUMAN    | 0.8579426  | 1.1932944 |
| sp Q13043 STK4_HUMAN    | 0.86018753 | 1.1932944 |
| sp Q9UBI6 GBG12_HUMAN   | 0.8608093  | 1.1932944 |
| sp Q13813-3 SPTN1_HUMAN | 0.8629608  | 1.1932944 |
| sp Q5VW32 BROX_HUMAN    | 0.8652382  | 1.1932944 |
| sp O95373 IPO7_HUMAN    | 0.86610794 | 1.1932944 |
| sp Q6DKJ4 NXN_HUMAN     | 0.8678398  | 1.1932944 |
| sp O94811 TPPP_HUMAN    | 0.8687048  | 1.1932944 |
| sp Q8N9N7 LRC57_HUMAN   | 0.8689232  | 1.1932944 |
| sp Q9Y2B0 CNPY2_HUMAN   | 0.871068   | 1.1932944 |
| sp P55058 PLTP_HUMAN    | 0.87511253 | 0.656254  |
| sp Q14697 GANAB_HUMAN   | 0.87521935 | 1.1932944 |
| sp Q92947 GCDH_HUMAN    | 0.884779   | 1.1932944 |
| sp P08134 RHOC_HUMAN    | 0.8859024  | 1.1932944 |
| sp A1L0T0 ILVBL_HUMAN   | 0.88726425 | 1.1932944 |
| sp P55263 ADK_HUMAN     | 0.8873997  | 1.1932944 |
| sp P01834 IGKC_HUMAN    | 0.8881016  | 1.1932944 |
| sp O76011 KRT34_HUMAN   | 0.8889885  | 0.656254  |
| sp Q96DG6 CMBL_HUMAN    | 0.8981781  | 1.1932944 |
| sp P04350 TBB4A_HUMAN   | 0.89946175 | 0.656254  |
| sp Q02750 MP2K1_HUMAN   | 0.90161896 | 1.1932944 |
| sp Q96BW5-2 PTER_HUMAN  | 0.9018669  | 1.1932944 |
| sp Q9HAV0 GBB4_HUMAN    | 0.9024277  | 1.1932944 |
| sp Q8N1B4-2 VPS52_HUMAN | 0.90395355 | 1.1932944 |
| sp P55039 DRG2_HUMAN    | 0.90400696 | 1.1932944 |
| sp Q99426 TBCB_HUMAN    | 0.90447426 | 1.1932944 |
| sp P30046 DOPD_HUMAN    | 0.90597343 | 1.1932944 |
| sp P32456 GBP2_HUMAN    | 0.9076538  | 1.1932944 |
| sp Q9Y281 COF2_HUMAN    | 0.90880585 | 1.1932944 |
| sp Q13464 ROCK1_HUMAN   | 0.91028595 | 0.656254  |
| sp Q9H0R4 HDHD2_HUMAN   | 0.9131012  | 1.1932944 |
| sp O60313-10 OPA1_HUMAN | 0.9160633  | 1.1932944 |
| sp P35813-3 PPM1A_HUMAN | 0.9239445  | 0.656254  |
| sp P06396 GELS_HUMAN    | 0.92774963 | 0.656254  |

|                         |            |           |
|-------------------------|------------|-----------|
| sp P67775-2 PP2AA_HUMAN | 0.9277649  | 0.656254  |
| sp Q8WZA0-2 LZIC_HUMAN  | 0.92811966 | 1.1932944 |
| sp P48741 HSP77_HUMAN   | 0.92988586 | 0.656254  |
| sp Q13496 MTM1_HUMAN    | 0.93530464 | 1.1932944 |
| sp P31321 KAP1_HUMAN    | 0.93650246 | 0.656254  |
| sp Q8TAT6-2 NPL4_HUMAN  | 0.93733025 | 1.1932944 |
| sp Q8N8S7-2 ENAH_HUMAN  | 0.9389992  | 1.1932944 |
| sp Q92629-2 SGCD_HUMAN  | 0.9430027  | 0.656254  |
| sp Q14108-2 SCRB2_HUMAN | 0.94644547 | 1.1932944 |
| sp P12931-2 SRC_HUMAN   | 0.94823456 | 1.1932944 |
| sp P31946-2 1433B_HUMAN | 0.9494953  | 0.656254  |
| sp P12814 ACTN1_HUMAN   | 0.9498558  | 0.656254  |
| sp Q7L576 CYFP1_HUMAN   | 0.9504776  | 0.656254  |
| sp Q13188 STK3_HUMAN    | 0.9505768  | 0.656254  |
| sp Q13885 TBB2A_HUMAN   | 0.9606228  | 0.656254  |
| sp Q15435 PP1R7_HUMAN   | 0.9624376  | 1.1932944 |
| sp P49841-2 GSK3B_HUMAN | 0.96341324 | 1.1932944 |
| sp Q7LG56-6 RIR2B_HUMAN | 0.969059   | 1.1932944 |
| sp Q5JPE7-2 NOMO2_HUMAN | 0.97125816 | 0.656254  |
| sp O95394-3 AGM1_HUMAN  | 0.9729023  | 1.1932944 |
| sp Q13310-2 PABP4_HUMAN | 0.97660065 | 0.656254  |
| sp P00736 C1R_HUMAN     | 0.9849682  | 1.1932944 |
| sp O94788-4 AL1A2_HUMAN | 0.9871521  | 0.656254  |
| sp O95816 BAG2_HUMAN    | 0.98739433 | 1.1932944 |
| sp Q9P289 STK26_HUMAN   | 0.99326324 | 0.656254  |
| sp Q8IUZ5 AT2L2_HUMAN   | 0.9977188  | 1.1932944 |
| sp Q9NWV4 CZIB_HUMAN    | 1.0192261  | 1.1932944 |
| sp P31323 KAP3_HUMAN    | 1.0231533  | 1.1932944 |
| sp Q9UQ16-2 DYN3_HUMAN  | 1.0273991  | 0.656254  |
| sp P40261 NNMT_HUMAN    | 1.0342674  | 1.1932944 |
| sp O75116 ROCK2_HUMAN   | 1.0586624  | 1.1932944 |
| sp Q14139-2 UBE4A_HUMAN | 1.0587826  | 1.1932944 |
| sp Q9GZM7-3 TINAL_HUMAN | 1.0591831  | 1.1932944 |
| sp O00186 STXB3_HUMAN   | 1.0605698  | 1.1932944 |
| sp P14324 FPPS_HUMAN    | 1.061451   | 1.1932944 |
| sp P00746 CFAD_HUMAN    | 1.0689907  | 1.1932944 |
| sp Q14BN4-2 SLMAP_HUMAN | 1.0704193  | 0.656254  |
| sp A5A3E0 POTEF_HUMAN   | 1.0800667  | 0.656254  |
| sp Q9UBB4-2 ATX10_HUMAN | 1.0924835  | 1.1932944 |
| sp Q14194-2 DPYL1_HUMAN | 1.0961552  | 0.656254  |
| sp Q13642-1 FHL1_HUMAN  | 1.105835   | 0.656254  |
| sp Q14697-2 GANAB_HUMAN | 1.1162376  | 0.656254  |
| sp O94832 MYO1D_HUMAN   | 1.1219692  | 1.1932944 |
| sp Q96JJ3-3 ELMO2_HUMAN | 1.1343489  | 0.656254  |
| sp Q15417 CNN3_HUMAN    | 1.1371155  | 1.1932944 |

|                         |           |           |
|-------------------------|-----------|-----------|
| sp Q8IUD2-2 RB6I2_HUMAN | 1.148016  | 0.656254  |
| sp Q14558-2 KPRA_HUMAN  | 1.1644859 | 0.656254  |
| sp P61601 NCALD_HUMAN   | 1.1730728 | 0.656254  |
| sp P54652 HSP72_HUMAN   | 1.1732521 | 0.656254  |
| sp Q06278 AOXA_HUMAN    | 1.1802559 | 1.1932944 |
| sp Q9ULC5-3 ACSL5_HUMAN | 1.1862621 | 0.656254  |
| sp Q9BWD1 THIC_HUMAN    | 1.1912355 | 0.656254  |
| sp P02461 CO3A1_HUMAN   | 1.1973248 | 1.1932944 |
| sp Q14651 PLSI_HUMAN    | 1.2018976 | 0.656254  |
| sp Q92599-2 SEPT8_HUMAN | 1.2073612 | 1.1932944 |
| sp Q8WUP2-3 FBLI1_HUMAN | 1.2081871 | 1.1932944 |
| sp O00499-10 BIN1_HUMAN | 1.2191963 | 1.1932944 |
| sp P28161 GSTM2_HUMAN   | 1.2301655 | 1.1932944 |
| sp Q01518 CAP1_HUMAN    | 1.2425175 | 0.656254  |
| sp P12111-4 CO6A3_HUMAN | 1.2472153 | 0.656254  |
| sp Q31612 1B73_HUMAN    | 1.2532406 | 0.656254  |
| sp P35612-2 ADDB_HUMAN  | 1.2534161 | 0.656254  |
| sp P0COL4 CO4A_HUMAN    | 1.2758293 | 1.1932944 |
| sp P51692 STA5B_HUMAN   | 1.30937   | 0.656254  |
| sp P11217-2 PYGM_HUMAN  | 1.315197  | 0.656254  |
| sp O75881 CP7B1_HUMAN   | 1.3291264 | 1.1932944 |
| sp P0CG38 POTEI_HUMAN   | 1.3546848 | 0.656254  |
| sp Q0ZGT2-4 NEXN_HUMAN  | 1.3724575 | 0.656254  |
| sp Q01518-2 CAP1_HUMAN  | 1.375186  | 0.656254  |
| sp P12814-2 ACTN1_HUMAN | 1.3782387 | 1.1932944 |
| sp O94911-3 ABCA8_HUMAN | 1.4074078 | 1.1932944 |
| sp Q3SY69 AL1L2_HUMAN   | 1.4197178 | 1.1932944 |
| sp P46821 MAP1B_HUMAN   | 1.4627838 | 1.1932944 |
| sp P55083-2 MFAP4_HUMAN | 1.5163555 | 1.1932944 |
| sp O14787-2 TNPO2_HUMAN | 1.5996323 | 0.656254  |
| sp Q9Y4G6 TLN2_HUMAN    | 1.6377687 | 1.1932944 |
| sp O95050-2 INMT_HUMAN  | 3.6173725 | 1.1932944 |
