# Supplementary material for: Peptidylarginine deiminase 2 citrullinates MZB1 and promotes the secretion of IgM and IgA
Source: PubMed Central journal article supplement (PMC10716219; doi:10.3389/fimmu.2023.1290585), 2023-11-29
Supplement: DataSheet_11.pdf [file DataSheet_11.pdf]

## Supplemental Table 11: COPD2 vs controls

| Accession #             | Fold Change | p value (-log10) |
|-------------------------|-------------|------------------|
| sp P59665 DEF1_HUMAN    | -1.1434555  | 2.1818786        |
| sp P48735-2 IDHP_HUMAN  | -1.1072845  | 4.051346         |
| sp Q96TA1-2 NIBL1_HUMAN | -1.0869656  | 2.7624686        |
| sp P99999 CYC_HUMAN     | -1.0351162  | 2.1818786        |
| sp P05109 S10A8_HUMAN   | -1.001688   | 3.5908275        |
| sp P26440 IVD_HUMAN     | -0.9941597  | 1.6960104        |
| sp O75874 IDHC_HUMAN    | -0.9063435  | 4.964395         |
| sp Q86VB7-2 C163A_HUMAN | -0.8977127  | 8.558914         |
| sp P51149 RAB7A_HUMAN   | -0.8947601  | 4.12427          |
| sp P31146 COR1A_HUMAN   | -0.8842259  | 6.409319         |
| sp P05141 ADT2_HUMAN    | -0.8831215  | 2.6576471        |
| sp Q16698-2 DECR_HUMAN  | -0.7982159  | 3.5844223        |
| sp P08311 CATG_HUMAN    | -0.7981072  | 4.051346         |
| sp P84090 ERH_HUMAN     | -0.7936516  | 2.1818786        |
| sp P17844-2 DDX5_HUMAN  | -0.7801628  | 4.051346         |
| sp Q00325-2 MPCP_HUMAN  | -0.7710629  | 3.1266599        |
| sp P05164-3 PERM_HUMAN  | -0.7599506  | 9.782528         |
| sp P51659 DHB4_HUMAN    | -0.7505779  | 12.077333        |
| sp Q02318 CP27A_HUMAN   | -0.7488728  | 1.6960104        |
| sp P51649-2 SSDH_HUMAN  | -0.7459621  | 2.1818786        |
| sp Q9P2R7-2 SUCB1_HUMAN | -0.7422466  | 3.1266599        |
| sp P11413-2 G6PD_HUMAN  | -0.737751   | 4.3153405        |
| sp P14866-2 HNRPL_HUMAN | -0.7370338  | 1.6960104        |
| sp P43490 NAMPT_HUMAN   | -0.7261505  | 6.7073655        |
| sp O00159-3 MYO1C_HUMAN | -0.7256584  | 7.665951         |
| sp P40121 CAPG_HUMAN    | -0.7208271  | 5.259211         |
| sp Q13217 DNJC3_HUMAN   | -0.7165871  | 2.1818786        |
| sp P02786 TFR1_HUMAN    | -0.7158203  | 4.051346         |
| sp Q96TC7 RMD3_HUMAN    | -0.7115784  | 1.6960104        |
| sp P17213 BPI_HUMAN     | -0.7111015  | 2.1818786        |
| sp Q02218-2 ODO1_HUMAN  | -0.7066155  | 4.051346         |
| sp P31949 S10AB_HUMAN   | -0.7009144  | 2.6576471        |
| sp Q8NBX0 SCPD_L_HUMAN  | -0.7007408  | 1.6960104        |
| sp Q9HC35-2 EMAL4_HUMAN | -0.7004871  | 2.6576471        |
| sp P11177-3 ODPB_HUMAN  | -0.6996956  | 3.5908275        |
| sp P07858 CATB_HUMAN    | -0.6947651  | 4.3153405        |
| sp P12429 ANXA3_HUMAN   | -0.6852989  | 7.36771          |
| sp Q9Y5P6-2 GMPPB_HUMAN | -0.6823635  | 1.6960104        |
| sp P06733 ENOA_HUMAN    | -0.6767731  | 11.808928        |
| sp P04179-4 SODM_HUMAN  | -0.6729813  | 3.1266599        |
| sp O00743-3 PPP6_HUMAN  | -0.6708756  | 1.6960104        |
| sp P08559-2 ODPA_HUMAN  | -0.662096   | 4.509013         |
| sp Q02543 RL18A_HUMAN   | -0.6577835  | 2.9807727        |

|                         |            |           |
|-------------------------|------------|-----------|
| sp O15143 ARC1B_HUMAN   | -0.6547623 | 3.7803535 |
| sp P07954-2 FUMH_HUMAN  | -0.6531849 | 2.6576471 |
| sp O75390 CISY_HUMAN    | -0.6417103 | 5.417897  |
| sp Q9P258 RCC2_HUMAN    | -0.6400223 | 2.1818786 |
| sp P12821-2 ACE_HUMAN   | -0.6392441 | 2.6576471 |
| sp P21397 AOFA_HUMAN    | -0.638443  | 5.7968407 |
| sp P05107 ITB2_HUMAN    | -0.634552  | 3.0019732 |
| sp P04083 ANXA1_HUMAN   | -0.6333618 | 9.57498   |
| sp P84103-2 SRSF3_HUMAN | -0.6314449 | 3.1266599 |
| sp P62263 RS14_HUMAN    | -0.630249  | 1.6960104 |
| sp P61626 LYSC_HUMAN    | -0.624691  | 2.6576471 |
| sp P33121-3 ACSL1_HUMAN | -0.6244488 | 1.5646582 |
| sp Q6NUK1-2 SCMC1_HUMAN | -0.6216774 | 2.6576471 |
| sp Q9BW30 TPPP3_HUMAN   | -0.6205025 | 2.9807727 |
| sp Q8NF37 PCAT1_HUMAN   | -0.6150093 | 1.6997428 |
| sp P18428 LBP_HUMAN     | -0.612915  | 1.6960104 |
| sp P53597 SUCA_HUMAN    | -0.6098576 | 1.6960104 |
| sp P07355-2 ANXA2_HUMAN | -0.6084957 | 4.628043  |
| sp Q13510-2 ASAH1_HUMAN | -0.6075344 | 5.792018  |
| sp P00505 AATM_HUMAN    | -0.602478  | 5.652275  |
| sp P54886-2 P5CS_HUMAN  | -0.5996552 | 1.6960104 |
| sp P62917 RL8_HUMAN     | -0.5975304 | 1.4278674 |
| sp P80188 NGAL_HUMAN    | -0.5926628 | 2.1800864 |
| sp P13073 COX41_HUMAN   | -0.5902176 | 1.6960104 |
| sp Q99715-4 COCA1_HUMAN | -0.5862274 | 1.6960104 |
| sp P68104 EF1A1_HUMAN   | -0.5826492 | 3.5908275 |
| sp P49327 FAS_HUMAN     | -0.5810318 | 10.275428 |
| sp P19367-2 HXX1_HUMAN  | -0.5803223 | 7.8127522 |
| sp P25774 CATS_HUMAN    | -0.5785027 | 1.6960104 |
| sp Q9Y3Z3 SAMH1_HUMAN   | -0.5771332 | 6.782829  |
| sp P62826 RAN_HUMAN     | -0.5769367 | 1.9413493 |
| sp P50995-2 ANX11_HUMAN | -0.5757771 | 5.7968407 |
| sp Q9HB40 RISC_HUMAN    | -0.5726852 | 1.6960104 |
| sp P31040 SDHA_HUMAN    | -0.5721893 | 4.372737  |
| sp P62906 RL10A_HUMAN   | -0.5705013 | 2.9807727 |
| sp Q92888-2 ARHG1_HUMAN | -0.5704041 | 1.6960104 |
| sp P13686 PPA5_HUMAN    | -0.5698643 | 1.6960104 |
| sp Q02252-2 MMSA_HUMAN  | -0.5689354 | 4.051346  |
| sp P01903 DRA_HUMAN     | -0.5687962 | 2.1818786 |
| sp P26038 MOES_HUMAN    | -0.5682888 | 14.398287 |
| sp P51648-2 AL3A2_HUMAN | -0.5680809 | 4.051346  |
| sp P63244 RACK1_HUMAN   | -0.5668678 | 5.9217625 |
| sp P05091 ALDH2_HUMAN   | -0.5667572 | 9.794418  |
| sp Q8IV08 PLD3_HUMAN    | -0.5657501 | 1.6960104 |
| sp P23786 CPT2_HUMAN    | -0.5654602 | 1.3815327 |

|                          |            |           |
|--------------------------|------------|-----------|
| sp P53007 TXTP_HUMAN     | -0.5623589 | 2.6576471 |
| sp P18077 RL35A_HUMAN    | -0.5607681 | 2.1818786 |
| sp Q92841-3 DDX17_HUMAN  | -0.5592842 | 4.400762  |
| sp P49756 RBM25_HUMAN    | -0.5578699 | 1.6960104 |
| sp P40429 RL13A_HUMAN    | -0.5558682 | 1.6960104 |
| sp Q9BXP5-2 SRRT_HUMAN   | -0.5548058 | 2.1818786 |
| sp P41218 MNDA_HUMAN     | -0.5538101 | 1.9647322 |
| sp P23246 SFPQ_HUMAN     | -0.5528526 | 4.964395  |
| sp Q9NZM1-6 MYOF_HUMAN   | -0.5517998 | 8.341435  |
| sp P06702 S10A9_HUMAN    | -0.5512161 | 3.4656596 |
| sp Q6PIU2-2 NCEH1_HUMAN  | -0.5505581 | 2.432837  |
| sp P43304 GPDM_HUMAN     | -0.5500031 | 2.441399  |
| sp P53621-2 COPA_HUMAN   | -0.5486031 | 5.2716713 |
| sp P53396-2 ACLY_HUMAN   | -0.548542  | 3.1092827 |
| sp P63000-2 RAC1_HUMAN   | -0.5475597 | 1.6960104 |
| sp P13804 ETFA_HUMAN     | -0.5473862 | 4.509013  |
| sp P31947 1433S_HUMAN    | -0.5462494 | 2.1818786 |
| sp P61106 RAB14_HUMAN    | -0.5427322 | 4.12427   |
| sp P49913 CAMP_HUMAN     | -0.542551  | 1.6960104 |
| sp Q16762 THTR_HUMAN     | -0.5382919 | 1.9647322 |
| sp P40926 MDHM_HUMAN     | -0.534195  | 8.061325  |
| sp O95994 AGR2_HUMAN     | -0.5324917 | 2.6576471 |
| sp P23381 SYWC_HUMAN     | -0.5318985 | 6.3098373 |
| sp O43837 IDH3B_HUMAN    | -0.5309601 | 1.6960104 |
| sp Q9Y6N5 SQOR_HUMAN     | -0.5304413 | 4.1814356 |
| sp Q9UFN0 NPS3A_HUMAN    | -0.5295658 | 1.6960104 |
| sp P07686 HEXB_HUMAN     | -0.5278606 | 3.1266599 |
| sp P07339 CATD_HUMAN     | -0.5274468 | 5.533072  |
| sp P09525 ANXA4_HUMAN    | -0.5254059 | 6.9721084 |
| sp Q9NNW7 TRXR2_HUMAN    | -0.5228291 | 2.1818786 |
| sp P08575-10 PTPRC_HUMAN | -0.5202255 | 3.8337784 |
| sp Q9UL25 RAB21_HUMAN    | -0.5200005 | 2.6576471 |
| sp P11940-2 PABP1_HUMAN  | -0.5192127 | 1.6960104 |
| sp P09467 F16P1_HUMAN    | -0.516531  | 5.417897  |
| sp P26641 EF1G_HUMAN     | -0.5132008 | 4.3100786 |
| sp Q12907 LMAN2_HUMAN    | -0.5090218 | 1.7165122 |
| sp Q10713 MPPA_HUMAN     | -0.5083714 | 1.9190748 |
| sp Q9BR76 COR1B_HUMAN    | -0.5082703 | 3.5908275 |
| sp Q9H0U4 RAB1B_HUMAN    | -0.5078335 | 1.6960104 |
| sp P61158 ARP3_HUMAN     | -0.5016403 | 8.365451  |
| sp P05023 AT1A1_HUMAN    | -0.5005245 | 8.558914  |
| sp Q13347 EIF3I_HUMAN    | -0.4990711 | 2.3143692 |
| sp P46777 RL5_HUMAN      | -0.4988174 | 4.285869  |
| sp P07384 CAN1_HUMAN     | -0.4967613 | 7.508114  |
| sp P29144 PPP2_HUMAN     | -0.4958153 | 1.6960104 |

|                         |            |           |
|-------------------------|------------|-----------|
| sp O75695 XRP2_HUMAN    | -0.4931946 | 1.6960104 |
| sp Q13418 ILK_HUMAN     | -0.4916821 | 3.103845  |
| sp P09211 GSTP1_HUMAN   | -0.4914589 | 4.0084753 |
| sp Q8WXF1 PSPC1_HUMAN   | -0.491024  | 2.6576471 |
| sp P63092-3 GNAS2_HUMAN | -0.4904347 | 2.9310203 |
| sp P35268 RL22_HUMAN    | -0.4868946 | 1.4104178 |
| sp Q15907-2 RB11B_HUMAN | -0.4847012 | 3.4656596 |
| sp P23284 PIIB_HUMAN    | -0.4833088 | 4.220149  |
| sp Q13045-2 FLII_HUMAN  | -0.4831924 | 2.6576471 |
| sp P05787-2 K2C8_HUMAN  | -0.4823704 | 12.761465 |
| sp P10155 RO60_HUMAN    | -0.4814701 | 3.316884  |
| sp P62873 GBB1_HUMAN    | -0.4808426 | 3.4656596 |
| sp P29350-3 PTN6_HUMAN  | -0.4790278 | 2.4829872 |
| sp P40939 ECHA_HUMAN    | -0.4789772 | 5.8299637 |
| sp Q9UBQ0-2 VPS29_HUMAN | -0.4781075 | 1.6960104 |
| sp P07099 HYEP_HUMAN    | -0.4773693 | 5.824478  |
| sp P10515 ODP2_HUMAN    | -0.4772053 | 2.838374  |
| sp P05362 ICAM1_HUMAN   | -0.475029  | 4.1861625 |
| sp P50213 IDH3A_HUMAN   | -0.4747849 | 3.1266599 |
| sp Q9ULV4-3 COR1C_HUMAN | -0.473402  | 2.7624686 |
| sp P61421 VA0D1_HUMAN   | -0.4716587 | 3.4656596 |
| sp P52272-2 HNRPM_HUMAN | -0.469883  | 5.9217625 |
| sp Q07020-2 RL18_HUMAN  | -0.4688282 | 1.6960104 |
| sp P47897 SYQ_HUMAN     | -0.4674492 | 2.6576471 |
| sp P13639 EF2_HUMAN     | -0.4653492 | 11.32408  |
| sp P29401-2 TKT_HUMAN   | -0.4648171 | 12.187731 |
| sp P13796 PLSL_HUMAN    | -0.4644299 | 10.021521 |
| sp Q969X5-2 ERGI1_HUMAN | -0.4597931 | 1.6960104 |
| sp P23396 RS3_HUMAN     | -0.4580097 | 6.815099  |
| sp Q96HE7 ERO1A_HUMAN   | -0.4579983 | 1.6960104 |
| sp Q8NBJ5 GT251_HUMAN   | -0.4570656 | 1.6960104 |
| sp Q9Y3I0 RTCB_HUMAN    | -0.4568558 | 3.5908275 |
| sp Q9BUJ2-4 HNRL1_HUMAN | -0.4565067 | 3.673847  |
| sp P29590 PML_HUMAN     | -0.4563885 | 3.656485  |
| sp Q9H8H3 MET7A_HUMAN   | -0.4526634 | 1.6960104 |
| sp Q15233 NONO_HUMAN    | -0.4511871 | 3.2925725 |
| sp P11021 BIP_HUMAN     | -0.4504318 | 13.726703 |
| sp O43813 LANC1_HUMAN   | -0.4503956 | 1.6960104 |
| sp P61247 RS3A_HUMAN    | -0.4492722 | 3.9417877 |
| sp Q96AG4 LRC59_HUMAN   | -0.4491272 | 1.6997428 |
| sp P60953 CDC42_HUMAN   | -0.4485779 | 2.9807727 |
| sp P46781 RS9_HUMAN     | -0.4474907 | 2.9807727 |
| sp P60842 IF4A1_HUMAN   | -0.4467735 | 3.412591  |
| sp P20700 LMNB1_HUMAN   | -0.4450245 | 13.583522 |
| sp P30740 ILEU_HUMAN    | -0.4449635 | 3.5908275 |

|                         |            |           |
|-------------------------|------------|-----------|
| sp P36578 RL4_HUMAN     | -0.4425507 | 3.5908275 |
| sp P08621-3 RU17_HUMAN  | -0.4421024 | 2.6576471 |
| sp P11310-2 ACADM_HUMAN | -0.4419594 | 3.1208909 |
| sp P62249 RS16_HUMAN    | -0.4416485 | 1.6960104 |
| sp O43760-2 SNG2_HUMAN  | -0.4400826 | 1.6960104 |
| sp Q8TCJ2 STT3B_HUMAN   | -0.438797  | 1.6960104 |
| sp P00558 PGK1_HUMAN    | -0.4378834 | 7.019849  |
| sp P35241 RADI_HUMAN    | -0.437602  | 2.441399  |
| sp P32455 GBP1_HUMAN    | -0.4372253 | 2.6576471 |
| sp P62805 H4_HUMAN      | -0.4368134 | 2.5815322 |
| sp Q13011 ECH1_HUMAN    | -0.4362221 | 3.887875  |
| sp Q12931-2 TRAP1_HUMAN | -0.435627  | 1.6960104 |
| sp Q07955-3 SRSF1_HUMAN | -0.4353027 | 4.509013  |
| sp O00299 CLIC1_HUMAN   | -0.4350395 | 5.919944  |
| sp P60903 S10AA_HUMAN   | -0.4347076 | 1.6960104 |
| sp P16435 NCPR_HUMAN    | -0.4338694 | 3.7726574 |
| sp P10253 LYAG_HUMAN    | -0.4337273 | 3.1266599 |
| sp Q9NSE4 SYIM_HUMAN    | -0.4320259 | 3.417183  |
| sp P21796 VDAC1_HUMAN   | -0.4316711 | 3.8106754 |
| sp P55884-2 EIF3B_HUMAN | -0.4310894 | 2.3143692 |
| sp P04080 CYTB_HUMAN    | -0.427639  | 1.6960104 |
| sp P09651-3 ROA1_HUMAN  | -0.4261437 | 1.6960104 |
| sp P08754 GNAI3_HUMAN   | -0.4227409 | 1.7590232 |
| sp O75643 U520_HUMAN    | -0.4215488 | 1.6960104 |
| sp O75083 WDR1_HUMAN    | -0.4203568 | 8.974431  |
| sp Q96KP4 CNDP2_HUMAN   | -0.4193516 | 5.8986344 |
| sp P15311 EZRI_HUMAN    | -0.4188862 | 4.3687334 |
| sp P38646 GRP75_HUMAN   | -0.4182358 | 7.2959604 |
| sp P11142 HSP7C_HUMAN   | -0.4178524 | 7.238645  |
| sp P24539 AT5F1_HUMAN   | -0.4173355 | 3.5908275 |
| sp P16615 AT2A2_HUMAN   | -0.4162216 | 6.409319  |
| sp P08865 RSSA_HUMAN    | -0.4154778 | 4.509013  |
| sp Q00839 HNRPU_HUMAN   | -0.413723  | 3.759042  |
| sp Q9UMS4 PRP19_HUMAN   | -0.4132004 | 2.9807727 |
| sp P51148-2 RAB5C_HUMAN | -0.412838  | 1.6960104 |
| sp Q14764 MVP_HUMAN     | -0.4122639 | 9.594336  |
| sp P20073-2 ANXA7_HUMAN | -0.4099999 | 3.103845  |
| sp P68366-2 TBA4A_HUMAN | -0.4093037 | 1.3815327 |
| sp P0DPI2-2 GAL3A_HUMAN | -0.4089451 | 1.6960104 |
| sp Q92973-2 TNPO1_HUMAN | -0.4086609 | 2.1818786 |
| sp Q04917 1433F_HUMAN   | -0.4082508 | 4.0084753 |
| sp P26639-2 SYTC_HUMAN  | -0.4080772 | 3.8106754 |
| sp P00167-2 CYB5_HUMAN  | -0.407259  | 2.1818786 |
| sp P59998 ARPC4_HUMAN   | -0.4071388 | 2.6576471 |
| sp P35914 HMGCL_HUMAN   | -0.4069614 | 2.6576471 |

|                         |            |           |
|-------------------------|------------|-----------|
| sp P30050 RL12_HUMAN    | -0.4068279 | 1.9647322 |
| sp Q9H3N1 TMX1_HUMAN    | -0.4063931 | 1.6960104 |
| sp Q9NZN4 EHD2_HUMAN    | -0.4058056 | 4.936604  |
| sp P49748-2 ACADV_HUMAN | -0.4052429 | 9.181708  |
| sp P42330 AK1C3_HUMAN   | -0.4044123 | 2.7624686 |
| sp P50395 GDIB_HUMAN    | -0.4021492 | 6.044454  |
| sp P53004 BIEA_HUMAN    | -0.401516  | 3.0251918 |
| sp Q15181 IPYR_HUMAN    | -0.4010353 | 1.6604291 |
| sp P01833 PIGR_HUMAN    | -0.4009476 | 3.734273  |
| sp Q00610-2 CLH1_HUMAN  | -0.400362  | 9.515519  |
| sp P14618 KPYM_HUMAN    | -0.3996773 | 2.3143692 |
| sp P23368 MAOM_HUMAN    | -0.3987694 | 2.653196  |
| sp P60900 PSA6_HUMAN    | -0.3982277 | 4.4091725 |
| sp P07237 PDIA1_HUMAN   | -0.3980484 | 12.207023 |
| sp P39023 RL3_HUMAN     | -0.3972645 | 2.1818786 |
| sp Q13724-2 MOGS_HUMAN  | -0.3948135 | 3.1266599 |
| sp Q9HCC0 MCCB_HUMAN    | -0.3939247 | 2.8384566 |
| sp P28838-2 AMPL_HUMAN  | -0.3925266 | 8.489705  |
| sp P61019 RAB2A_HUMAN   | -0.3914127 | 2.1404836 |
| sp P49407-2 ARRB1_HUMAN | -0.3900051 | 2.6576471 |
| sp Q16629-2 SRSF7_HUMAN | -0.389473  | 1.9647322 |
| sp Q9NQR4 NIT2_HUMAN    | -0.3880844 | 2.6576471 |
| sp Q01469 FABP5_HUMAN   | -0.3876438 | 4.051346  |
| sp Q86UX7-2 URP2_HUMAN  | -0.387598  | 3.0824287 |
| sp P46782 RS5_HUMAN     | -0.3872948 | 4.051346  |
| sp P61604 CH10_HUMAN    | -0.3871746 | 3.1266599 |
| sp P35606 COPB2_HUMAN   | -0.3865624 | 4.953735  |
| sp P07910-2 HNRPC_HUMAN | -0.3860493 | 1.5646582 |
| sp Q92597 NDRG1_HUMAN   | -0.3853073 | 1.5646582 |
| sp P15121 ALDR_HUMAN    | -0.3845635 | 3.4979637 |
| sp Q9Y383-3 LC7L2_HUMAN | -0.38414   | 1.6960104 |
| sp P07203 GPX1_HUMAN    | -0.3822899 | 1.5567774 |
| sp P30048-2 PRDX3_HUMAN | -0.3822155 | 2.6576471 |
| sp Q8N335 GPD1L_HUMAN   | -0.3819771 | 1.6960104 |
| sp P52209-2 6PGD_HUMAN  | -0.3806915 | 4.773267  |
| sp P14625 ENPL_HUMAN    | -0.3805542 | 10.328907 |
| sp Q13451 FKBP5_HUMAN   | -0.3801727 | 1.560883  |
| sp Q13425 SNTB2_HUMAN   | -0.3800755 | 2.1818786 |
| sp P00966 ASSY_HUMAN    | -0.3796864 | 1.827201  |
| sp P12081-4 SYHC_HUMAN  | -0.3787422 | 1.6960104 |
| sp Q99798 ACON_HUMAN    | -0.3785954 | 5.4543324 |
| sp P22897 MRC1_HUMAN    | -0.3781967 | 4.9245296 |
| sp Q02878 RL6_HUMAN     | -0.3771515 | 1.6960104 |
| sp P0DMV9 HS71B_HUMAN   | -0.375473  | 8.238753  |
| sp Q99829 CPNE1_HUMAN   | -0.3744144 | 1.6092666 |

|                         |            |           |
|-------------------------|------------|-----------|
| sp P26373 RL13_HUMAN    | -0.3738422 | 1.9647322 |
| sp P49411 EFTU_HUMAN    | -0.3724957 | 4.8244376 |
| sp P27361 MK03_HUMAN    | -0.3724823 | 1.6960104 |
| sp O43776 SYNC_HUMAN    | -0.3720589 | 1.6295799 |
| sp Q99536 VAT1_HUMAN    | -0.3717194 | 2.816493  |
| sp Q9UL18 AGO1_HUMAN    | -0.3711071 | 1.6960104 |
| sp Q9UNM6-2 PSD13_HUMAN | -0.3706589 | 1.8444856 |
| sp P09622 DLDH_HUMAN    | -0.3704605 | 3.416951  |
| sp Q96I99 SUCB2_HUMAN   | -0.3703098 | 4.509013  |
| sp Q8WUM4 PDC6I_HUMAN   | -0.3702126 | 4.1549106 |
| sp P09960 LKHA4_HUMAN   | -0.3700733 | 7.430463  |
| sp P25788-2 PSA3_HUMAN  | -0.3695736 | 2.4829872 |
| sp O00231-2 PSD11_HUMAN | -0.3693085 | 2.1818786 |
| sp Q9Y5S9-2 RBM8A_HUMAN | -0.3689995 | 1.6960104 |
| sp P24752 THIL_HUMAN    | -0.3687515 | 5.161142  |
| sp Q9NYU2-2 UGGG1_HUMAN | -0.3685074 | 4.5929456 |
| sp P09668 CATH_HUMAN    | -0.3684788 | 3.0251918 |
| sp Q9NZ08-2 ERAP1_HUMAN | -0.3663139 | 2.923088  |
| sp P17655 CAN2_HUMAN    | -0.366127  | 4.229326  |
| sp Q03135 CAV1_HUMAN    | -0.3654747 | 2.1818786 |
| sp P53634 CATC_HUMAN    | -0.3647728 | 1.4104178 |
| sp P55735-2 SEC13_HUMAN | -0.3631249 | 2.1818786 |
| sp A0AVT1 UBA6_HUMAN    | -0.3627205 | 1.4716977 |
| sp P13667 PDIA4_HUMAN   | -0.3616791 | 10.720789 |
| sp Q13740-2 CD166_HUMAN | -0.3608437 | 4.285869  |
| sp P51858 HDGF_HUMAN    | -0.3607369 | 2.1818786 |
| sp Q15393 SF3B3_HUMAN   | -0.3606186 | 3.1266599 |
| sp P18124 RL7_HUMAN     | -0.3593712 | 1.8444856 |
| sp Q1KMD3 HNRL2_HUMAN   | -0.3592033 | 4.628043  |
| sp P63104 1433Z_HUMAN   | -0.3578472 | 4.4116287 |
| sp P30040 ERP29_HUMAN   | -0.3577328 | 2.1800864 |
| sp P10768 ESTD_HUMAN    | -0.35639   | 2.3143692 |
| sp Q9BS26 ERP44_HUMAN   | -0.3555679 | 3.316884  |
| sp Q15084-2 PDIA6_HUMAN | -0.3552761 | 6.0532455 |
| sp P42765 THIM_HUMAN    | -0.3552742 | 4.599569  |
| sp P16278-2 BGAL_HUMAN  | -0.3551617 | 2.6576471 |
| sp P04843 RPN1_HUMAN    | -0.3549614 | 4.870417  |
| sp P49189 AL9A1_HUMAN   | -0.3545303 | 5.490865  |
| sp P50453 SPB9_HUMAN    | -0.3541489 | 3.5908275 |
| sp P28482 MK01_HUMAN    | -0.3537369 | 2.6576471 |
| sp P07737 PROF1_HUMAN   | -0.3532639 | 6.359477  |
| sp P84095 RHOG_HUMAN    | -0.3529072 | 1.6960104 |
| sp P30101 PDIA3_HUMAN   | -0.3509502 | 10.661194 |
| sp P60228 EIF3E_HUMAN   | -0.3508472 | 1.8604537 |
| sp P55060-3 XPO2_HUMAN  | -0.3505364 | 1.9951487 |

|                         |            |           |
|-------------------------|------------|-----------|
| sp P22626 ROA2_HUMAN    | -0.3502598 | 6.2597647 |
| sp O43707 ACTN4_HUMAN   | -0.3498097 | 12.6026   |
| sp P46940 IQGA1_HUMAN   | -0.3497829 | 12.901511 |
| sp Q9P0L0-2 VAPA_HUMAN  | -0.3490028 | 2.9807727 |
| sp P31943 HNRH1_HUMAN   | -0.348753  | 2.5644996 |
| sp P15880 RS2_HUMAN     | -0.3482781 | 1.7590232 |
| sp P02750 A2GL_HUMAN    | -0.3478355 | 3.1266599 |
| sp P51991 ROA3_HUMAN    | -0.3475857 | 1.7590232 |
| sp P35237 SPB6_HUMAN    | -0.347292  | 4.7853546 |
| sp Q9HDC9 APMAP_HUMAN   | -0.3464394 | 5.241378  |
| sp P50914 RL14_HUMAN    | -0.3453312 | 1.6960104 |
| sp Q99873-3 ANM1_HUMAN  | -0.3441849 | 1.8444856 |
| sp P38919 IF4A3_HUMAN   | -0.3439884 | 2.987788  |
| sp P62258 1433E_HUMAN   | -0.3426476 | 2.1818786 |
| sp Q99714 HCD2_HUMAN    | -0.3424492 | 3.5908275 |
| sp P46063 RECQ1_HUMAN   | -0.3418617 | 2.6576471 |
| sp Q02978-2 M2OM_HUMAN  | -0.3415833 | 1.6960104 |
| sp Q96RQ3 MCCA_HUMAN    | -0.3407764 | 1.7590232 |
| sp P22314 UBA1_HUMAN    | -0.3392563 | 4.824669  |
| sp Q16543 CDC37_HUMAN   | -0.3392239 | 4.3267694 |
| sp P54136 SYRC_HUMAN    | -0.3386231 | 2.6576471 |
| sp P08727 K1C19_HUMAN   | -0.3370667 | 8.999274  |
| sp P08236-2 BGLR_HUMAN  | -0.3369751 | 1.5646582 |
| sp Q08211 DHX9_HUMAN    | -0.3366089 | 5.688027  |
| sp P63096 GNAI1_HUMAN   | -0.336277  | 1.4104178 |
| sp Q9NSD9 SYFB_HUMAN    | -0.3355141 | 2.1818786 |
| sp O43143 DHX15_HUMAN   | -0.3352356 | 1.6997428 |
| sp P04066 FUCO_HUMAN    | -0.3346691 | 1.6960104 |
| sp Q15109-10 RAGE_HUMAN | -0.3343773 | 1.7590232 |
| sp Q9Y678 COPG1_HUMAN   | -0.3343716 | 5.1649675 |
| sp P51572-2 BAP31_HUMAN | -0.3336945 | 3.5908275 |
| sp P35270 SPRE_HUMAN    | -0.3336182 | 1.4278674 |
| sp P14314-2 GLU2B_HUMAN | -0.3323975 | 3.5908275 |
| sp Q9UHQ9 NB5R1_HUMAN   | -0.3304615 | 1.9647322 |
| sp P10606 COX5B_HUMAN   | -0.3299446 | 1.4104178 |
| sp P63010-2 AP2B1_HUMAN | -0.3294354 | 1.6092666 |
| sp P42224-2 STAT1_HUMAN | -0.326128  | 1.4936475 |
| sp P07900-2 HS90A_HUMAN | -0.3257885 | 4.833581  |
| sp Q9H4A4 AMPB_HUMAN    | -0.3236752 | 3.707581  |
| sp Q13409-3 DC112_HUMAN | -0.3231163 | 1.5054473 |
| sp P35222 CTNB1_HUMAN   | -0.3227863 | 3.4979637 |
| sp P16219 ACADS_HUMAN   | -0.3222065 | 2.6576471 |
| sp P05165-2 PCCA_HUMAN  | -0.3215561 | 5.229891  |
| sp Q9Y230 RUVB2_HUMAN   | -0.3205471 | 2.4761837 |
| sp P00390-2 GSHR_HUMAN  | -0.320221  | 4.051346  |



|                         |            |           |
|-------------------------|------------|-----------|
| sp Q96QK1 VPS35_HUMAN   | -0.3186073 | 2.400925  |
| sp P00367 DHE3_HUMAN    | -0.3184815 | 3.1516862 |
| sp Q5JPE7-2 NOMO2_HUMAN | -0.3184605 | 1.6960104 |
| sp P55084 ECHB_HUMAN    | -0.31637   | 3.1223214 |
| sp Q9NQW7-3 XPP1_HUMAN  | -0.3160515 | 1.9413493 |
| sp O95782-2 AP2A1_HUMAN | -0.3154373 | 2.3143692 |
| sp P54577 SYYC_HUMAN    | -0.3144932 | 1.6960104 |
| sp Q8TDL5 BPIB1_HUMAN   | -0.3136826 | 2.5461748 |
| sp P12956 XRCC6_HUMAN   | -0.3135071 | 5.2716713 |
| sp P13010 XRCC5_HUMAN   | -0.3134575 | 4.553372  |
| sp P22695 QCR2_HUMAN    | -0.3133469 | 3.417183  |
| sp O43747-2 AP1G1_HUMAN | -0.3122635 | 2.1818786 |
| sp P21953 ODBB_HUMAN    | -0.311758  | 1.6960104 |
| sp P15144 AMPN_HUMAN    | -0.3114338 | 1.4050349 |
| sp P14550 AK1A1_HUMAN   | -0.3114262 | 3.7734513 |
| sp P27797 CALR_HUMAN    | -0.3111057 | 5.869831  |
| sp P49354-2 FNNTA_HUMAN | -0.3105125 | 2.1818786 |
| sp Q7L1Q6-2 BZW1_HUMAN  | -0.3100357 | 1.4104178 |
| sp P30153 2AAA_HUMAN    | -0.3092766 | 4.5929456 |
| sp Q16851 UGPA_HUMAN    | -0.3082333 | 4.984084  |
| sp P28062 PSB8_HUMAN    | -0.3081322 | 2.1818786 |
| sp Q15293 RCN1_HUMAN    | -0.3056603 | 2.6576471 |
| sp Q14974 IMB1_HUMAN    | -0.3055801 | 4.372737  |
| sp O75131 CPNE3_HUMAN   | -0.3046284 | 2.4846697 |
| sp P05534 1A24_HUMAN    | -0.3041077 | 1.6960104 |
| sp P43034 LIS1_HUMAN    | -0.3034611 | 2.5644996 |
| sp Q9UHB6-4 LIMA1_HUMAN | -0.3032246 | 1.9647322 |
| sp P62820 RAB1A_HUMAN   | -0.3024616 | 2.1818786 |
| sp O96009 NAPSA_HUMAN   | -0.3024178 | 1.6997428 |
| sp P05783 K1C18_HUMAN   | -0.3023891 | 6.965214  |
| sp P16152 CBR1_HUMAN    | -0.3019199 | 2.6182911 |
| sp P40763-3 STAT3_HUMAN | -0.301899  | 1.9647322 |
| sp P07988 PSPB_HUMAN    | -0.3015461 | 1.7703108 |
| sp O75436 VP26A_HUMAN   | -0.3015232 | 2.151766  |
| sp P62136 PP1A_HUMAN    | -0.300972  | 1.6960104 |
| sp O75348 VATG1_HUMAN   | -0.2997055 | 1.6960104 |
| sp O43175 SERA_HUMAN    | -0.299324  | 4.033051  |
| sp P17931 LEG3_HUMAN    | -0.2991943 | 2.6576471 |
| sp Q14103-3 HNRPD_HUMAN | -0.2986527 | 2.997126  |
| sp P48444 COPD_HUMAN    | -0.2984905 | 6.9433603 |
| sp Q6P2Q9 PRP8_HUMAN    | -0.2984085 | 1.6960104 |
| sp P04075 ALDOA_HUMAN   | -0.2974892 | 7.232633  |
| sp P14543-2 NID1_HUMAN  | -0.2974129 | 4.0566006 |
| sp Q9NQC3 RTN4_HUMAN    | -0.2972984 | 1.9647322 |
| sp O15144 ARPC2_HUMAN   | -0.2972755 | 2.1800864 |

|                         |            |           |
|-------------------------|------------|-----------|
| sp P55263 ADK_HUMAN     | -0.2967472 | 1.9647322 |
| sp Q96CW1-2 AP2M1_HUMAN | -0.2952614 | 2.1818786 |
| sp P36957 ODO2_HUMAN    | -0.295187  | 3.412591  |
| sp Q96AE4-2 FUBP1_HUMAN | -0.293808  | 1.6853416 |
| sp Q9NP72 RAB18_HUMAN   | -0.292984  | 2.1818786 |
| sp O95479 G6PE_HUMAN    | -0.2906647 | 1.3815327 |
| sp P23634-8 AT2B4_HUMAN | -0.2895489 | 1.6832623 |
| sp Q9Y3F4-2 STRAP_HUMAN | -0.2891102 | 1.4104178 |
| sp P49593-2 PPM1F_HUMAN | -0.2882328 | 1.9647322 |
| sp Q92945 FUBP2_HUMAN   | -0.2872543 | 2.6134143 |
| sp Q07157 ZO1_HUMAN     | -0.2868862 | 3.887875  |
| sp Q9BXS5-2 AP1M1_HUMAN | -0.2867699 | 2.1818786 |
| sp Q92688-2 AN32B_HUMAN | -0.2864399 | 1.6960104 |
| sp P13284 GILT_HUMAN    | -0.2857323 | 1.6960104 |
| sp P13489 RINI_HUMAN    | -0.2853355 | 5.6671495 |
| sp P34897-2 GLYM_HUMAN  | -0.284811  | 1.9997257 |
| sp P18669 PGAM1_HUMAN   | -0.2840881 | 4.66111   |
| sp P46926 GNPI1_HUMAN   | -0.2835255 | 1.9647322 |
| sp P50454 SERPH_HUMAN   | -0.2816353 | 3.622396  |
| sp P05026-2 AT1B1_HUMAN | -0.2815971 | 2.4829872 |
| sp O14773 TPP1_HUMAN    | -0.2813759 | 1.9647322 |
| sp P13797 PLST_HUMAN    | -0.2812138 | 2.9110386 |
| sp Q13423 NNTM_HUMAN    | -0.2809906 | 1.6295799 |
| sp Q9H223 EHD4_HUMAN    | -0.2804833 | 3.6746628 |
| sp P09110 THIK_HUMAN    | -0.2800827 | 1.9647322 |
| sp P30084 ECHM_HUMAN    | -0.2796726 | 1.560883  |
| sp Q14165 MLEC_HUMAN    | -0.2794304 | 1.6960104 |
| sp P31939 PUR9_HUMAN    | -0.279417  | 2.2535503 |
| sp O14936-2 CSKP_HUMAN  | -0.2782097 | 1.9951487 |
| sp P62316-2 SMD2_HUMAN  | -0.2767181 | 1.6960104 |
| sp P31150 GDIA_HUMAN    | -0.2745285 | 2.9903855 |
| sp P09917 LOX5_HUMAN    | -0.2743282 | 1.8444856 |
| sp Q16658 FSCN1_HUMAN   | -0.2742176 | 2.7936864 |
| sp Q9NR45 SIAS_HUMAN    | -0.2739391 | 1.9972724 |
| sp Q16531 DDB1_HUMAN    | -0.2727757 | 3.5570853 |
| sp P62140 PP1B_HUMAN    | -0.2725411 | 1.4104178 |
| sp O00170 AIP_HUMAN     | -0.2719269 | 1.9647322 |
| sp P62993 GRB2_HUMAN    | -0.2710953 | 1.9413493 |
| sp Q9UNF0-2 PACN2_HUMAN | -0.271019  | 2.4829872 |
| sp P27348 1433T_HUMAN   | -0.2703285 | 1.9153107 |
| sp P06744 G6PI_HUMAN    | -0.2676029 | 6.054049  |
| sp O43242 PSMD3_HUMAN   | -0.2656918 | 2.112052  |
| sp Q16881-2 TRXR1_HUMAN | -0.2653294 | 2.2731557 |
| sp Q13162 PRDX4_HUMAN   | -0.2644463 | 1.3080103 |
| sp Q9Y277-2 VDAC3_HUMAN | -0.2639427 | 2.5461748 |

|                         |            |           |
|-------------------------|------------|-----------|
| sp P49419-2 AL7A1_HUMAN | -0.2639351 | 3.8491135 |
| sp P14923 PLAK_HUMAN    | -0.2637138 | 1.6604291 |
| sp Q9ULA0 DNPEP_HUMAN   | -0.2631054 | 4.4923797 |
| sp Q96G03 PGM2_HUMAN    | -0.2626438 | 2.6182911 |
| sp Q8WWI1-5 LMO7_HUMAN  | -0.2621384 | 2.3787699 |
| sp P26196 DDX6_HUMAN    | -0.2618351 | 1.4104178 |
| sp Q12906-4 ILF3_HUMAN  | -0.2617378 | 5.178646  |
| sp P50552 VASP_HUMAN    | -0.2612362 | 1.6092666 |
| sp Q8IZ83-3 A16A1_HUMAN | -0.2594872 | 2.2958338 |
| sp O14745 NHRF1_HUMAN   | -0.2586975 | 1.6960104 |
| sp P10809 CH60_HUMAN    | -0.2576599 | 3.9826555 |
| sp Q15717-2 ELAV1_HUMAN | -0.2561588 | 1.4104178 |
| sp P20618 PSB1_HUMAN    | -0.2561092 | 3.5908275 |
| sp P23526 SAHH_HUMAN    | -0.2547798 | 4.798874  |
| sp P42704 LPPRC_HUMAN   | -0.2547379 | 1.4278674 |
| sp Q9NPH2 INO1_HUMAN    | -0.2535782 | 2.6997027 |
| sp P52597 HNRPF_HUMAN   | -0.2532616 | 1.3080103 |
| sp P37802 TAGL2_HUMAN   | -0.251215  | 2.7847733 |
| sp P25398 RS12_HUMAN    | -0.250804  | 2.6134143 |
| sp P14780 MMP9_HUMAN    | -0.2504082 | 1.7165122 |
| sp P55072 TERA_HUMAN    | -0.2496452 | 9.507561  |
| sp Q9BRA2 TXD17_HUMAN   | -0.2489719 | 1.3815327 |
| sp Q9NUV9 GIMA4_HUMAN   | -0.2484646 | 1.6092666 |
| sp P05198 IF2A_HUMAN    | -0.2475243 | 2.1818786 |
| sp P20340-2 RAB6A_HUMAN | -0.2469273 | 3.417183  |
| sp Q9BVK6 TMED9_HUMAN   | -0.2465153 | 1.6960104 |
| sp Q9BSJ8-2 ESYT1_HUMAN | -0.2455711 | 5.074809  |
| sp O15247 CLIC2_HUMAN   | -0.2445698 | 1.7165122 |
| sp Q9UIJ7 KAD3_HUMAN    | -0.2437096 | 1.7165122 |
| sp P25705 ATPA_HUMAN    | -0.2429581 | 1.6604291 |
| sp P11215-2 ITAM_HUMAN  | -0.2420521 | 2.7472508 |
| sp P28065-2 PSB9_HUMAN  | -0.241539  | 1.9951487 |
| sp P60174 TPIS_HUMAN    | -0.2414398 | 4.28272   |
| sp O14579 COPE_HUMAN    | -0.2402325 | 2.3143692 |
| sp Q9BUT1 BDH2_HUMAN    | -0.2396145 | 1.9190748 |
| sp Q9NZA1-2 CLIC5_HUMAN | -0.2394066 | 1.6832623 |
| sp O60749 SNX2_HUMAN    | -0.2393398 | 3.9658737 |
| sp P06737-2 PYGL_HUMAN  | -0.238163  | 3.455751  |
| sp P49368 TCPG_HUMAN    | -0.2379723 | 4.6680183 |
| sp P35232 PHB_HUMAN     | -0.2363358 | 2.8132849 |
| sp P37837 TALDO_HUMAN   | -0.2341328 | 5.2000947 |
| sp Q7KZF4 SND1_HUMAN    | -0.2336559 | 2.2613342 |
| sp P29218 IMPA1_HUMAN   | -0.2331219 | 1.7703108 |
| sp P09758 TACD2_HUMAN   | -0.2321911 | 2.1818786 |
| sp P14868 SYDC_HUMAN    | -0.2313461 | 3.9138026 |

|                         |            |           |
|-------------------------|------------|-----------|
| sp O94760 DDAH1_HUMAN   | -0.2306995 | 2.1818786 |
| sp P39656-3 OST48_HUMAN | -0.2303619 | 3.1629772 |
| sp P47756-2 CAPZB_HUMAN | -0.2299652 | 2.549662  |
| sp O75369-2 FLNB_HUMAN  | -0.2288151 | 10.731803 |
| sp P30837 AL1B1_HUMAN   | -0.2275314 | 2.3143692 |
| sp Q01130-2 SRSF2_HUMAN | -0.2274513 | 1.4104178 |
| sp P20674 COX5A_HUMAN   | -0.2274303 | 1.6960104 |
| sp P36776-3 LONM_HUMAN  | -0.2269688 | 1.4278674 |
| sp P24821-4 TENA_HUMAN  | -0.2268753 | 1.5071542 |
| sp P08133 ANXA6_HUMAN   | -0.226593  | 8.74701   |
| sp P07814 SYEP_HUMAN    | -0.2245312 | 1.4351699 |
| sp P09874 PARP1_HUMAN   | -0.2241554 | 1.827201  |
| sp P31930 QCR1_HUMAN    | -0.2236977 | 1.7647069 |
| sp O15511 ARPC5_HUMAN   | -0.2235909 | 1.6604291 |
| sp P08729 K2C7_HUMAN    | -0.2233391 | 11.867092 |
| sp Q99729-3 ROAA_HUMAN  | -0.2215405 | 2.2419565 |
| sp P26447 S10A4_HUMAN   | -0.2210503 | 2.151766  |
| sp P50990 TCPQ_HUMAN    | -0.2206936 | 5.627495  |
| sp P25786-2 PSA1_HUMAN  | -0.2204113 | 3.9685462 |
| sp P34932 HSP74_HUMAN   | -0.22015   | 3.0865371 |
| sp Q15366-2 PCBP2_HUMAN | -0.2197495 | 1.6960104 |
| sp P28331-2 NDUS1_HUMAN | -0.2193537 | 2.151766  |
| sp P61978-3 HNRPK_HUMAN | -0.218544  | 4.656231  |
| sp O75947-2 ATP5H_HUMAN | -0.2183609 | 2.432837  |
| sp Q14204 DYHC1_HUMAN   | -0.2180748 | 1.709563  |
| sp P05455 LA_HUMAN      | -0.2174816 | 1.9190748 |
| sp Q13263 TIF1B_HUMAN   | -0.215786  | 1.3895186 |
| sp P49588-2 SYAC_HUMAN  | -0.2154465 | 2.9661083 |
| sp Q08257 QOR_HUMAN     | -0.2134972 | 1.4832523 |
| sp O00567 NOP56_HUMAN   | -0.2133427 | 1.3567923 |
| sp P61163 ACTZ_HUMAN    | -0.2115288 | 1.9647322 |
| sp O95831-3 AIFM1_HUMAN | -0.2111797 | 3.0495367 |
| sp P49591 SYSC_HUMAN    | -0.2076263 | 1.4289604 |
| sp P29692-2 EF1D_HUMAN  | -0.2076149 | 1.6960104 |
| sp P13861 KAP2_HUMAN    | -0.2068939 | 3.3572266 |
| sp P00403 COX2_HUMAN    | -0.2067528 | 1.5646582 |
| sp P19338 NUCL_HUMAN    | -0.2064343 | 3.903645  |
| sp P62241 RS8_HUMAN     | -0.2060108 | 3.1266599 |
| sp Q9UL46 PSME2_HUMAN   | -0.2038422 | 1.560883  |
| sp Q9P2B2 FPRP_HUMAN    | -0.2028084 | 1.4050349 |
| sp P22234-2 PUR6_HUMAN  | -0.2023468 | 2.151766  |
| sp P62081 RS7_HUMAN     | -0.2021008 | 1.6960104 |
| sp Q15631 TSN_HUMAN     | -0.2017441 | 1.3815327 |
| sp P13611 CSPG2_HUMAN   | -0.2005577 | 3.5442007 |
| sp P00338 LDHA_HUMAN    | -0.1999397 | 2.0895255 |

|                         |            |           |
|-------------------------|------------|-----------|
| sp O43491 E41L2_HUMAN   | -0.1991234 | 1.9308543 |
| sp Q9UHG3 PCYOX_HUMAN   | -0.1990414 | 3.5378873 |
| sp P53992 SC24C_HUMAN   | -0.1988802 | 2.1818786 |
| sp P00488 F13A_HUMAN    | -0.1977081 | 1.9828281 |
| sp P08670 VIME_HUMAN    | -0.1974621 | 11.281799 |
| sp P35998 PRS7_HUMAN    | -0.1970387 | 1.6853416 |
| sp Q16891-2 MIC60_HUMAN | -0.1960983 | 1.7451575 |
| sp P61081 UBC12_HUMAN   | -0.1940651 | 2.6576471 |
| sp P52566 GDIR2_HUMAN   | -0.1935501 | 2.432837  |
| sp Q99832 TCPH_HUMAN    | -0.1935177 | 2.8438601 |
| sp O15173-2 PGRC2_HUMAN | -0.1902542 | 1.7590232 |
| sp P46976-2 GLYG_HUMAN  | -0.1893539 | 1.560883  |
| sp Q15582 BGH3_HUMAN    | -0.1891365 | 2.3051164 |
| sp Q9UKV3-5 ACINU_HUMAN | -0.1872253 | 1.9647322 |
| sp Q8NBS9 TXND5_HUMAN   | -0.1863403 | 5.001318  |
| sp Q12905 ILF2_HUMAN    | -0.1802921 | 2.2613342 |
| sp P62266 RS23_HUMAN    | -0.1794853 | 1.560883  |
| sp P00387-3 NB5R3_HUMAN | -0.1791229 | 1.4278674 |
| sp P52565 GDIR1_HUMAN   | -0.1788998 | 2.3388627 |
| sp P00352 AL1A1_HUMAN   | -0.1787834 | 4.450073  |
| sp Q13308-6 PTK7_HUMAN  | -0.1769295 | 1.9647322 |
| sp Q02790 FKBP4_HUMAN   | -0.1759605 | 2.1818786 |
| sp Q15365 PCBP1_HUMAN   | -0.1759148 | 1.4050349 |
| sp Q99460 PSMD1_HUMAN   | -0.1753292 | 1.804513  |
| sp O43390-2 HNRPR_HUMAN | -0.1751957 | 1.8380218 |
| sp O75396 SC22B_HUMAN   | -0.1735649 | 1.4050349 |
| sp P50570-2 DYN2_HUMAN  | -0.1706619 | 1.6092666 |
| sp Q13228-4 SBP1_HUMAN  | -0.1706162 | 4.0222406 |
| sp P25789 PSA4_HUMAN    | -0.1694527 | 1.9308543 |
| sp Q99623 PHB2_HUMAN    | -0.1688328 | 2.0265307 |
| sp P61981 1433G_HUMAN   | -0.1680832 | 1.5121045 |
| sp Q6DD88 ATLA3_HUMAN   | -0.1674004 | 1.3080103 |
| sp P55786 PSA_HUMAN     | -0.1643906 | 3.201616  |
| sp P21281 VATB2_HUMAN   | -0.1623888 | 1.9951487 |
| sp Q8N1G4 LRC47_HUMAN   | -0.1622963 | 3.2221727 |
| sp P47755 CAZA2_HUMAN   | -0.1613388 | 2.1663873 |
| sp P32969 RL9_HUMAN     | -0.1606369 | 1.6960104 |
| sp Q06830 PRDX1_HUMAN   | -0.1605682 | 3.6087239 |
| sp P50895 BCAM_HUMAN    | -0.1600246 | 2.9456708 |
| sp P62277 RS13_HUMAN    | -0.1587296 | 2.1818786 |
| sp Q16555 DPYL2_HUMAN   | -0.1581001 | 2.8510797 |
| sp P52907 CAZA1_HUMAN   | -0.1560116 | 1.7703108 |
| sp Q9UBE0 SAE1_HUMAN    | -0.1556168 | 1.4104178 |
| sp Q9P2E9 RRBP1_HUMAN   | -0.1555672 | 7.8947906 |
| sp P54920 SNA4_HUMAN    | -0.1550922 | 2.4364867 |

|                         |            |           |
|-------------------------|------------|-----------|
| sp Q6YN16 HSDL2_HUMAN   | -0.154582  | 1.6960104 |
| sp P09972 ALDOC_HUMAN   | -0.1537094 | 1.9951487 |
| sp Q15599-2 NHRF2_HUMAN | -0.151001  | 1.6997428 |
| sp O00264 PGRC1_HUMAN   | -0.1486282 | 1.6997428 |
| sp P62888 RL30_HUMAN    | -0.1481209 | 1.4104178 |
| sp Q14203-3 DCTN1_HUMAN | -0.1480484 | 1.3080103 |
| sp P35221 CTNA1_HUMAN   | -0.1476898 | 3.5868163 |
| sp Q13185 CBX3_HUMAN    | -0.1471272 | 1.5646582 |
| sp Q9Y624 JAM1_HUMAN    | -0.1455498 | 1.3635377 |
| sp P43121 MUC18_HUMAN   | -0.1454296 | 1.8444856 |
| sp P49821-2 NDUV1_HUMAN | -0.1438141 | 2.1404836 |
| sp P19971 TYPH_HUMAN    | -0.1420021 | 1.4342331 |
| sp O14818 PSA7_HUMAN    | -0.1414108 | 1.9547566 |
| sp Q07065 CKAP4_HUMAN   | -0.1396027 | 4.8765783 |
| sp Q06323 PSME1_HUMAN   | -0.1387177 | 2.0727112 |
| sp P08758 ANXA5_HUMAN   | -0.1386623 | 1.4431648 |
| sp P04844 RPN2_HUMAN    | -0.1381187 | 1.4278674 |
| sp Q15124 PGM5_HUMAN    | -0.1376114 | 1.5565699 |
| sp P11766 ADHX_HUMAN    | -0.134491  | 1.3274423 |
| sp P09496-2 CLCA_HUMAN  | -0.1316109 | 1.7590232 |
| sp Q9H2D6-2 TARA_HUMAN  | -0.12957   | 1.515701  |
| sp P40227 TCPZ_HUMAN    | -0.1294231 | 1.6545225 |
| sp P06576 ATPB_HUMAN    | -0.1249275 | 3.5483983 |
| sp P16284-3 PECA1_HUMAN | -0.121769  | 2.0337436 |
| sp O15230 LAMA5_HUMAN   | -0.1212273 | 2.0156884 |
| sp Q9UBG0 MRC2_HUMAN    | -0.1091328 | 1.3184075 |
| sp P23141-2 EST1_HUMAN  | -0.1078587 | 2.735238  |
| sp Q02818 NUCB1_HUMAN   | -0.1036758 | 1.3437729 |
| sp P98160 PGBM_HUMAN    | -0.1035366 | 2.6836658 |
| sp P18206-2 VINC_HUMAN  | -0.1015472 | 5.9874315 |
| sp Q8IU7 AEBP1_HUMAN    | -0.0954533 | 1.827201  |
| sp Q14195-2 DPYL3_HUMAN | -0.0918236 | 1.9030465 |
| sp P02545 LMNA_HUMAN    | -0.0901241 | 6.3223624 |
| sp P46939-2 UTRO_HUMAN  | -0.0862579 | 1.3156533 |
| sp Q86UP2-4 KTN1_HUMAN  | -0.080019  | 1.8444856 |
| sp Q03252 LMNB2_HUMAN   | -0.0682697 | 1.9998069 |
| sp Q14767 LTBP2_HUMAN   | -0.0661459 | 1.5117614 |
| sp P09497-2 CLCB_HUMAN  | -0.0553894 | 1.3815327 |
| sp Q15019-2 SEPT2_HUMAN | -0.0534782 | 1.8831652 |
| sp Q05707 COEA1_HUMAN   | 0.067379   | 2.774158  |
| sp P04792 HSPB1_HUMAN   | 0.07087708 | 1.7659291 |
| sp P11047 LAMC1_HUMAN   | 0.0709095  | 1.858108  |
| sp Q07507 DERM_HUMAN    | 0.10429001 | 1.7703108 |
| sp P51911 CNN1_HUMAN    | 0.1061821  | 1.4068714 |
| sp Q7Z406 MYH14_HUMAN   | 0.12259293 | 3.381076  |

|                         |            |           |
|-------------------------|------------|-----------|
| sp P00751 CFAB_HUMAN    | 0.12550163 | 3.6288962 |
| sp Q16363-2 LAMA4_HUMAN | 0.12610245 | 3.4914024 |
| sp P02671 FIBA_HUMAN    | 0.12709236 | 1.9274682 |
| sp P00450 CERU_HUMAN    | 0.12908554 | 3.2943964 |
| sp A6NMZ7 CO6A6_HUMAN   | 0.1383667  | 1.8350728 |
| sp Q8N2S1 LTBP4_HUMAN   | 0.14060402 | 2.5391243 |
| sp P05556 ITB1_HUMAN    | 0.15581131 | 6.041628  |
| sp P00492 HPRT_HUMAN    | 0.15593338 | 2.1818786 |
| sp Q14315-2 FLNC_HUMAN  | 0.15694046 | 10.35943  |
| sp P21291 CSRP1_HUMAN   | 0.15939903 | 3.0793355 |
| sp P02768 ALBU_HUMAN    | 0.16853333 | 1.3906018 |
| sp P06681-3 CO2_HUMAN   | 0.17321014 | 1.9951487 |
| sp P04217 A1BG_HUMAN    | 0.17682457 | 2.8793902 |
| sp P02511 CRYAB_HUMAN   | 0.18787003 | 1.6960104 |
| sp P01876 IGHA1_HUMAN   | 0.18862915 | 3.3283036 |
| sp P07357 CO8A_HUMAN    | 0.19548035 | 1.4278674 |
| sp Q6XQN6-2 PNCB_HUMAN  | 0.19822693 | 1.5071542 |
| sp P21266 GSTM3_HUMAN   | 0.20181656 | 2.044628  |
| sp P56199 ITA1_HUMAN    | 0.20426369 | 4.546434  |
| sp P01860 IGHG3_HUMAN   | 0.21148682 | 1.560883  |
| sp P27105 STOM_HUMAN    | 0.21913719 | 4.044672  |
| sp P02748 CO9_HUMAN     | 0.22149658 | 2.975305  |
| sp P60660-2 MYL6_HUMAN  | 0.2262268  | 3.671968  |
| sp P36955 PEDF_HUMAN    | 0.22843552 | 1.9951487 |
| sp P01031 CO5_HUMAN     | 0.23292351 | 5.134014  |
| sp P02452 CO1A1_HUMAN   | 0.23876762 | 2.058973  |
| sp P98095-2 FBLN2_HUMAN | 0.24297333 | 3.455751  |
| sp P04040 CATA_HUMAN    | 0.24402046 | 6.1563954 |
| sp P07358 CO8B_HUMAN    | 0.24963188 | 2.1818786 |
| sp Q12805-2 FBLN3_HUMAN | 0.25226593 | 4.748085  |
| sp Q9Y6C2 EMIL1_HUMAN   | 0.2540226  | 4.192454  |
| sp P07951 TPM2_HUMAN    | 0.25456047 | 1.827201  |
| sp P00734 THRB_HUMAN    | 0.26342964 | 4.4162235 |
| sp Q9Y3D6 FIS1_HUMAN    | 0.26423264 | 1.6960104 |
| sp P00441 SODC_HUMAN    | 0.27708817 | 2.3143692 |
| sp P0DOX5 IGG1_HUMAN    | 0.27853775 | 3.9658737 |
| sp P05156 CFAI_HUMAN    | 0.27938843 | 4.051346  |
| sp P21810 PGS1_HUMAN    | 0.2801361  | 3.261748  |
| sp P08572 CO4A2_HUMAN   | 0.28465462 | 2.7305796 |
| sp Q01995 TAGL_HUMAN    | 0.2856617  | 5.742677  |
| sp P08473 NEP_HUMAN     | 0.28759193 | 1.6960104 |
| sp P36269-3 GGT5_HUMAN  | 0.29522133 | 1.6092666 |
| sp P01009 A1AT_HUMAN    | 0.29598618 | 7.023117  |
| sp Q9UMS6-2 SYNP2_HUMAN | 0.29974747 | 2.2323174 |
| sp A1L4H1 SRCRL_HUMAN   | 0.30083466 | 1.6960104 |

|                         |            |           |
|-------------------------|------------|-----------|
| sp Q0ZGT2-4 NEXN_HUMAN  | 0.302763   | 3.412591  |
| sp P03952 KLKB1_HUMAN   | 0.30330658 | 2.1818786 |
| sp Q07075 AMPE_HUMAN    | 0.3085518  | 1.7590232 |
| sp P09493-9 TPM1_HUMAN  | 0.31389618 | 1.6960104 |
| sp P16157-21 ANK1_HUMAN | 0.33254623 | 3.622396  |
| sp P24844 MYL9_HUMAN    | 0.34386444 | 1.6960104 |
| sp P02790 HEMO_HUMAN    | 0.35511017 | 5.303003  |
| sp P25311 ZA2G_HUMAN    | 0.35788536 | 4.051346  |
| sp P00325 ADH1B_HUMAN   | 0.363163   | 3.5190198 |
| sp P19827 ITIH1_HUMAN   | 0.36735916 | 3.0253785 |
| sp P17661 DESM_HUMAN    | 0.38835144 | 14.699317 |
| sp P30041 PRDX6_HUMAN   | 0.38887405 | 4.5314264 |
| sp P16671-4 CD36_HUMAN  | 0.39097214 | 2.1818786 |
| sp P09493-8 TPM1_HUMAN  | 0.39201736 | 3.5908275 |
| sp P02774-3 VTDB_HUMAN  | 0.39401817 | 7.9121003 |
| sp P02766 TTHY_HUMAN    | 0.3955307  | 1.9647322 |
| sp P00491 PNPH_HUMAN    | 0.3961029  | 3.2450993 |
| sp P08603 CFAH_HUMAN    | 0.39652252 | 12.649239 |
| sp Q9UBX5 FBLN5_HUMAN   | 0.41771698 | 3.412591  |
| sp P35527 K1C9_HUMAN    | 0.42129326 | 5.6770253 |
| sp P00747 PLMN_HUMAN    | 0.42140198 | 6.1581025 |
| sp P35580-3 MYH10_HUMAN | 0.42673302 | 14.282492 |
| sp P15090 FABP4_HUMAN   | 0.4310379  | 3.1266599 |
| sp P51888 PRELP_HUMAN   | 0.43401718 | 5.869831  |
| sp P30043 BLVRB_HUMAN   | 0.4383793  | 1.7590232 |
| sp P11678 PERE_HUMAN    | 0.4480133  | 1.4104178 |
| sp P04003 C4BPA_HUMAN   | 0.44812202 | 5.7968407 |
| sp P01019 ANGT_HUMAN    | 0.45259285 | 1.9647322 |
| sp P27169 PON1_HUMAN    | 0.46069717 | 1.6960104 |
| sp P35749 MYH11_HUMAN   | 0.46853828 | 15.051499 |
| sp P02649 APOE_HUMAN    | 0.4686203  | 4.5016932 |
| sp P04259 K2C6B_HUMAN   | 0.48851204 | 1.9647322 |
| sp P08123 CO1A2_HUMAN   | 0.4899025  | 1.8444856 |
| sp P02760 AMBIP_HUMAN   | 0.49378586 | 3.5908275 |
| sp P23456 Trypsin       | 0.49433327 | 3.5908275 |
| sp P11277-2 SPTB1_HUMAN | 0.5000839  | 4.95426   |
| sp P19823 ITIH2_HUMAN   | 0.52166176 | 5.417897  |
| sp P21980 TGM2_HUMAN    | 0.5339699  | 9.789072  |
| sp P01871-2 IGHM_HUMAN  | 0.5422306  | 2.1818786 |
| sp P43652 AFAM_HUMAN    | 0.545166   | 4.509013  |
| sp P05546 HEP2_HUMAN    | 0.56792927 | 2.6576471 |
| sp P02749 APOH_HUMAN    | 0.57450867 | 2.2385595 |
| sp P04114 APOB_HUMAN    | 0.57496643 | 10.942365 |
| sp P01008 ANT3_HUMAN    | 0.5877552  | 8.010044  |
| sp P13716-2 HEM2_HUMAN  | 0.59879494 | 3.5908275 |



|                         |            |           |
|-------------------------|------------|-----------|
| sp P08294 SODE_HUMAN    | 0.6058388  | 2.8384566 |
| sp O14558 HSPB6_HUMAN   | 0.6175957  | 1.9951487 |
| sp P29622 KAIN_HUMAN    | 0.61922836 | 2.6576471 |
| sp P02743 SAMP_HUMAN    | 0.6318455  | 4.509013  |
| sp P02787 TRFE_HUMAN    | 0.65704346 | 14.724141 |
| sp P51884 LUM_HUMAN     | 0.6701145  | 8.112776  |
| sp P01042-2 KNG1_HUMAN  | 0.67518806 | 7.2183566 |
| sp P04264 K2C1_HUMAN    | 0.70025826 | 12.045783 |
| sp P35908 K22E_HUMAN    | 0.717186   | 7.665951  |
| sp P07585 PGS2_HUMAN    | 0.7200966  | 5.338249  |
| sp P13645 K1C10_HUMAN   | 0.7252445  | 10.200565 |
| sp Q5TDH0-3 DDI2_HUMAN  | 0.7323704  | 1.6960104 |
| sp P02730 B3AT_HUMAN    | 0.73609734 | 6.7698927 |
| sp P10909-5 CLUS_HUMAN  | 0.7464943  | 4.964395  |
| sp P02549-2 SPTA1_HUMAN | 0.8312626  | 9.058883  |
| sp P07451 CAH3_HUMAN    | 0.8336315  | 3.1266599 |
| sp P06727 APOA4_HUMAN   | 0.8424301  | 5.98738   |
| sp P07738 PMGE_HUMAN    | 0.90335464 | 2.1818786 |
| sp P20774 MIME_HUMAN    | 1.0496197  | 4.051346  |
| sp P02652-2 APOA2_HUMAN | 1.1846085  | 3.1266599 |
| sp P00918 CAH2_HUMAN    | 1.2519054  | 4.509013  |
| sp P02647 APOA1_HUMAN   | 1.274868   | 13.420564 |
| sp P32119 PRDX2_HUMAN   | 1.4412308  | 6.7698927 |
| sp P02042 HBD_HUMAN     | 1.6058521  | 4.051346  |
| sp P00915 CAH1_HUMAN    | 1.721487   | 7.665951  |
| sp P68871 HBB_HUMAN     | 1.8555679  | 4.051346  |
| sp P69905 HBA_HUMAN     | 2.1029243  | 4.051346  |
| sp P04229 2B11_HUMAN    | -2.2219257 | 0.656254  |
| sp P08263 GSTA1_HUMAN   | -2.1355228 | 0.656254  |
| sp P08246 ELNE_HUMAN    | -1.3340645 | 1.1932944 |
| sp P13760 2B14_HUMAN    | -1.232172  | 1.2773042 |
| sp P12236 ADT3_HUMAN    | -1.0901146 | 1.1932944 |
| sp P13761 2B17_HUMAN    | -1.0802727 | 0         |
| sp Q86TX2 ACOT1_HUMAN   | -1.0426483 | 0.656254  |
| sp P02741 CRP_HUMAN     | -1.0062256 | 1.1932944 |
| sp O00757 F16P2_HUMAN   | -1.0049801 | 1.1932944 |
| sp P68371 TBB4B_HUMAN   | -0.9974442 | 1.1932944 |
| sp P51153 RAB13_HUMAN   | -0.9821014 | 0.656254  |
| sp P54108-2 CRIS3_HUMAN | -0.9708176 | 0.656254  |
| sp Q9UBR2 CATZ_HUMAN    | -0.9673367 | 1.1932944 |
| sp Q9HD89 RETN_HUMAN    | -0.9641037 | 1.1932944 |
| sp Q13938-4 CAYP1_HUMAN | -0.9013062 | 0.656254  |
| sp Q9H2U2-3 IPYR2_HUMAN | -0.8743992 | 0.656254  |
| sp Q9BWS9-3 CHID1_HUMAN | -0.854763  | 0.656254  |
| sp P15559-2 NQO1_HUMAN  | -0.8539333 | 1.1932944 |

|                           |            |           |
|---------------------------|------------|-----------|
| sp P38159 RBMX_HUMAN      | -0.8475208 | 0.656254  |
| sp P11586 C1TC_HUMAN      | -0.8423853 | 0.7061832 |
| sp A6NMY6 AXA2L_HUMAN     | -0.8380165 | 0.656254  |
| sp P06396-2 GELS_HUMAN    | -0.8181171 | 0.656254  |
| sp Q29963 1C06_HUMAN      | -0.7859402 | 0.656254  |
| sp Q12846 STX4_HUMAN      | -0.7844124 | 0.656254  |
| sp P11387 TOP1_HUMAN      | -0.7710934 | 1.1932944 |
| sp Q96IJ6-2 GMPPA_HUMAN   | -0.7543345 | 1.1932944 |
| sp P51606-2 RENBP_HUMAN   | -0.7510128 | 1.1932944 |
| sp O95197-2 RTN3_HUMAN    | -0.749445  | 1.1932944 |
| sp Q15185-3 TEBP_HUMAN    | -0.7354126 | 1.1932944 |
| sp P63167 DYL1_HUMAN      | -0.711937  | 0.656254  |
| sp POCG39 POTEJ_HUMAN     | -0.7092247 | 0.656254  |
| sp P62834 RAP1A_HUMAN     | -0.705574  | 0.656254  |
| sp Q9NUB1-2 ACS2L_HUMAN   | -0.698225  | 1.1932944 |
| sp O43795-2 MYO1B_HUMAN   | -0.6936245 | 0.7827403 |
| sp A0A0B4J1X8 HV343_HUMAN | -0.6877708 | 0.656254  |
| sp P28330 ACADL_HUMAN     | -0.6522293 | 1.1932944 |
| sp Q03135-2 CAV1_HUMAN    | -0.6492806 | 0.656254  |
| sp P27635 RL10_HUMAN      | -0.6467896 | 0.656254  |
| sp Q16822 PCKGM_HUMAN     | -0.6280899 | 1.1932944 |
| sp Q8NBQ5 DHB11_HUMAN     | -0.6153679 | 0.7827403 |
| sp O60701-2 UGDH_HUMAN    | -0.6132889 | 0.656254  |
| sp P63261 ACTG_HUMAN      | -0.6130772 | 0.656254  |
| sp Q562R1 ACTBL_HUMAN     | -0.6006661 | 0.6070219 |
| sp P60709 ACTB_HUMAN      | -0.5986881 | 0.656254  |
| sp Q13884 SNTB1_HUMAN     | -0.5885353 | 0.7827403 |
| sp P08962-2 CD63_HUMAN    | -0.587883  | 1.1932944 |
| sp Q15056-2 IF4H_HUMAN    | -0.5872421 | 1.1932944 |
| sp P20702 ITAX_HUMAN      | -0.5785523 | 0.656254  |
| sp Q8TD06 AGR3_HUMAN      | -0.5775299 | 1.1932944 |
| sp O75533 SF3B1_HUMAN     | -0.5772476 | 0.7827403 |
| sp Q96FV2-2 SCRN2_HUMAN   | -0.5754013 | 1.1932944 |
| sp O95394-3 AGM1_HUMAN    | -0.5680809 | 1.1932944 |
| sp P04839 CY24B_HUMAN     | -0.5673189 | 1.1932944 |
| sp Q9Y394-2 DHRS7_HUMAN   | -0.5621166 | 1.2095301 |
| sp P10619-2 PPGB_HUMAN    | -0.5587711 | 1.1932944 |
| sp Q9P2J5-2 SYLC_HUMAN    | -0.5575085 | 0.7827403 |
| sp Q01518 CAP1_HUMAN      | -0.5542402 | 0.656254  |
| sp P24158 PRTN3_HUMAN     | -0.5539551 | 1.1505735 |
| sp P52788-2 SPSY_HUMAN    | -0.5516262 | 1.1932944 |
| sp Q14956-2 GPNMB_HUMAN   | -0.5465889 | 1.1932944 |
| sp P07948-2 LYN_HUMAN     | -0.5422115 | 1.1932944 |
| sp P62244 RS15A_HUMAN     | -0.5230141 | 1.1932944 |
| sp P30419-2 NMT1_HUMAN    | -0.5208435 | 0.656254  |

|                         |            |            |
|-------------------------|------------|------------|
| sp P18085 ARF4_HUMAN    | -0.5197945 | 0.656254   |
| sp Q16539-2 MK14_HUMAN  | -0.5161457 | 1.1932944  |
| sp P15153 RAC2_HUMAN    | -0.5131683 | 0.656254   |
| sp Q13283 G3BP1_HUMAN   | -0.5041752 | 0.6070219  |
| sp P63218 GBG5_HUMAN    | -0.5029736 | 1.1932944  |
| sp Q8N684-3 CPSF7_HUMAN | -0.4998703 | 0.6070219  |
| sp Q7L576 CYFP1_HUMAN   | -0.4980688 | 1.1932944  |
| sp P45954-2 ACDSB_HUMAN | -0.4918842 | 1.1932944  |
| sp P78406 RAE1L_HUMAN   | -0.4898758 | 1.1932944  |
| sp P15170-2 ERF3A_HUMAN | -0.4879723 | 1.1932944  |
| sp P27824-2 CALX_HUMAN  | -0.4847984 | 1.0475321  |
| sp O75923-11 DYSF_HUMAN | -0.4806671 | 0.35795313 |
| sp Q9UHN6-2 CEIP2_HUMAN | -0.4787102 | 0.7827403  |
| sp P24534 EF1B_HUMAN    | -0.4741688 | 1.1932944  |
| sp Q9NVJ2 ARL8B_HUMAN   | -0.473917  | 1.1932944  |
| sp P08134 RHOC_HUMAN    | -0.4707813 | 0.7827403  |
| sp P37235 HPCL1_HUMAN   | -0.4697075 | 0.656254   |
| sp P61586 RHOA_HUMAN    | -0.466507  | 1.1932944  |
| sp Q9Y262-2 EIF3L_HUMAN | -0.4656086 | 1.0370445  |
| sp P35080-2 PROF2_HUMAN | -0.459877  | 0.656254   |
| sp P51991-2 ROA3_HUMAN  | -0.4571457 | 0.656254   |
| sp P19404 NDUV2_HUMAN   | -0.4501343 | 1.1932944  |
| sp P50579-2 MAP2_HUMAN  | -0.4476681 | 1.1932944  |
| sp Q9UBS4 DJB11_HUMAN   | -0.4453831 | 1.1932944  |
| sp Q8NHP8 PLBL2_HUMAN   | -0.4417439 | 1.1932944  |
| sp Q99538-2 LGMN_HUMAN  | -0.4414682 | 0.7827403  |
| sp P30566 PUR8_HUMAN    | -0.4413261 | 0.656254   |
| sp Q9HD45 TM9S3_HUMAN   | -0.4389744 | 1.1932944  |
| sp P12694 ODBA_HUMAN    | -0.4387684 | 0.7061832  |
| sp P62854 RS26_HUMAN    | -0.4378357 | 1.1932944  |
| sp P61313 RL15_HUMAN    | -0.4375725 | 1.1932944  |
| sp P04222 1C03_HUMAN    | -0.4375649 | 0.656254   |
| sp P12235 ADT1_HUMAN    | -0.4358978 | 0.656254   |
| sp Q14697 GANAB_HUMAN   | -0.4299164 | 1.1932944  |
| sp P01111 RASN_HUMAN    | -0.4293423 | 0.656254   |
| sp P30838 AL3A1_HUMAN   | -0.4284649 | 1.1932944  |
| sp P28676 GRAN_HUMAN    | -0.4268494 | 1.1932944  |
| sp Q71UM5 RS27L_HUMAN   | -0.426405  | 1.1932944  |
| sp Q14344 GNA13_HUMAN   | -0.4231491 | 0.8983557  |
| sp Q9UQ80 PA2G4_HUMAN   | -0.4225426 | 0.656254   |
| sp O76003 GLRX3_HUMAN   | -0.4121933 | 0.656254   |
| sp P11717 MPRI_HUMAN    | -0.4086895 | 1.1932944  |
| sp Q96JB5-4 CK5P3_HUMAN | -0.4079342 | 0.7061832  |
| sp Q8NC51-3 PAIRB_HUMAN | -0.4077358 | 1.1932944  |
| sp Q07812-7 BAX_HUMAN   | -0.4071026 | 1.1932944  |

|                         |            |            |
|-------------------------|------------|------------|
| sp P06239-3 LCK_HUMAN   | -0.4054699 | 0.656254   |
| sp O00712-4 NFIB_HUMAN  | -0.404953  | 0.656254   |
| sp P62745 RHOB_HUMAN    | -0.402195  | 0.656254   |
| sp P09417-2 DHPR_HUMAN  | -0.4013786 | 0.45033538 |
| sp P06865 HEXA_HUMAN    | -0.3977661 | 1.2773042  |
| sp P51553-2 IDH3G_HUMAN | -0.3975678 | 1.1932944  |
| sp P46977 STT3A_HUMAN   | -0.3947601 | 1.1932944  |
| sp Q14152 EIF3A_HUMAN   | -0.3932705 | 0.35795313 |
| sp O75828 CBR3_HUMAN    | -0.3920307 | 1.1932944  |
| sp P52895 AK1C2_HUMAN   | -0.3891993 | 0.45033538 |
| sp Q9ULZ3-2 ASC_HUMAN   | -0.3877678 | 0          |
| sp P20160 CAP7_HUMAN    | -0.3840103 | 0.91601294 |
| sp P26368-2 U2AF2_HUMAN | -0.3839188 | 1.1932944  |
| sp P31946-2 1433B_HUMAN | -0.3810577 | 0.656254   |
| sp P36551 HEM6_HUMAN    | -0.3786755 | 0.19149946 |
| sp Q13310-2 PABP4_HUMAN | -0.3765907 | 0.656254   |
| sp P61160 ARP2_HUMAN    | -0.374876  | 1.1932944  |
| sp Q9NPJ3 ACO13_HUMAN   | -0.3742695 | 1.1932944  |
| sp O94905 ERLN2_HUMAN   | -0.3707714 | 1.1932944  |
| sp Q8TBC4-2 UBA3_HUMAN  | -0.3698387 | 0.7827403  |
| sp Q32P44 EMAL3_HUMAN   | -0.3693543 | 1.2773042  |
| sp Q9UH99-3 SUN2_HUMAN  | -0.3683872 | 1.0485198  |
| sp P62714 PP2AB_HUMAN   | -0.3637085 | 0.656254   |
| sp Q7L2H7 EIF3M_HUMAN   | -0.3622532 | 0.656254   |
| sp Q8NDH3 PEPL1_HUMAN   | -0.3610382 | 1.2095301  |
| sp P61916-2 NPC2_HUMAN  | -0.3596306 | 1.1932944  |
| sp P42226 STAT6_HUMAN   | -0.3578796 | 0.656254   |
| sp O00186 STXB3_HUMAN   | -0.3552275 | 0.45033538 |
| sp P63151-2 2ABA_HUMAN  | -0.3543987 | 1.1932944  |
| sp Q06828 FMOD_HUMAN    | -0.3537445 | 1.1932944  |
| sp P61353 RL27_HUMAN    | -0.3535042 | 1.1932944  |
| sp O95716 RAB3D_HUMAN   | -0.3523026 | 0.656254   |
| sp P62995-3 TRA2B_HUMAN | -0.3521347 | 1.1932944  |
| sp Q9NPY3 C1QR1_HUMAN   | -0.352066  | 1.1932944  |
| sp Q16134-3 ETFD_HUMAN  | -0.3515568 | 1.1932944  |
| sp O43252 PAPS1_HUMAN   | -0.3508263 | 1.0301651  |
| sp Q5SSJ5-2 HP1B3_HUMAN | -0.3506928 | 1.0485198  |
| sp P31689-2 DNJA1_HUMAN | -0.3500481 | 1.1932944  |
| sp Q9BQE3 TBA1C_HUMAN   | -0.3491592 | 0.656254   |
| sp P22059 OSBP1_HUMAN   | -0.3484116 | 1.1932944  |
| sp P11233 RALA_HUMAN    | -0.3469429 | 0.8983557  |
| sp Q03113 GNA12_HUMAN   | -0.3462658 | 0.656254   |
| sp P52789 HXK2_HUMAN    | -0.3460026 | 0.656254   |
| sp Q13200 PSMD2_HUMAN   | -0.3452511 | 0.91601294 |
| sp O60271-4 JIP4_HUMAN  | -0.3450584 | 0.7061832  |

|                         |            |            |
|-------------------------|------------|------------|
| sp O43684-2 BUB3_HUMAN  | -0.3435268 | 1.1932944  |
| sp P61956-2 SUMO2_HUMAN | -0.343338  | 0.656254   |
| sp Q9Y305-4 ACOT9_HUMAN | -0.3432121 | 1.1932944  |
| sp Q15691 MARE1_HUMAN   | -0.3426037 | 0.95332193 |
| sp P63220 RS21_HUMAN    | -0.3420677 | 1.1932944  |
| sp Q92696 PGTA_HUMAN    | -0.3418961 | 1.1791906  |
| sp Q13813-3 SPTN1_HUMAN | -0.3415871 | 0.19149946 |
| sp P20292 AL5AP_HUMAN   | -0.340538  | 0.35795313 |
| sp P49257 LMAN1_HUMAN   | -0.3361244 | 0.96371543 |
| sp P60866-2 RS20_HUMAN  | -0.3336277 | 1.1932944  |
| sp Q9H2G2-2 SLK_HUMAN   | -0.3330212 | 0.7827403  |
| sp P26885 FKBP2_HUMAN   | -0.3321838 | 1.1932944  |
| sp Q6P4A8 PLBL1_HUMAN   | -0.3321114 | 0.7588735  |
| sp P07437 TBB5_HUMAN    | -0.3306255 | 0.6298893  |
| sp Q96C23 GALM_HUMAN    | -0.3300076 | 1.1505735  |
| sp P46459 NSF_HUMAN     | -0.3271275 | 1.2095301  |
| sp P04062-2 GLCM_HUMAN  | -0.3267632 | 1.1932944  |
| sp O00534 VMA5A_HUMAN   | -0.3239784 | 1.0634323  |
| sp P31153 METK2_HUMAN   | -0.3218136 | 0.656254   |
| sp O60784-3 TOM1_HUMAN  | -0.3205376 | 0.656254   |
| sp P53041 PPP5_HUMAN    | -0.3198147 | 0.7061832  |
| sp P36871 PGM1_HUMAN    | -0.3194313 | 1.1932944  |
| sp A5A3E0 POTEF_HUMAN   | -0.3193693 | 0          |
| sp Q8TD19 NEK9_HUMAN    | -0.3185234 | 1.1932944  |
| sp P31946 1433B_HUMAN   | -0.3176098 | 0.656254   |
| sp Q01813-2 PFKAP_HUMAN | -0.3172779 | 0.90036625 |
| sp O75323 NIPS2_HUMAN   | -0.314867  | 1.1932944  |
| sp P49458 SRP09_HUMAN   | -0.3116608 | 1.1932944  |
| sp O14744 ANM5_HUMAN    | -0.3102551 | 1.1932944  |
| sp P08631-2 HCK_HUMAN   | -0.3070431 | 0.656254   |
| sp Q9NZ01 TECR_HUMAN    | -0.3069658 | 1.0485198  |
| sp P50452 SPB8_HUMAN    | -0.3061066 | 1.1932944  |
| sp O95340-2 PAPS2_HUMAN | -0.3044529 | 1.1276597  |
| sp Q13435 SF3B2_HUMAN   | -0.3043251 | 1.1932944  |
| sp P55265-4 DSRAD_HUMAN | -0.3041019 | 0.7061832  |
| sp P57088 TMM33_HUMAN   | -0.3038807 | 1.1932944  |
| sp Q7Z4I7-3 LIMS2_HUMAN | -0.3033857 | 1.1932944  |
| sp P33151 CADH5_HUMAN   | -0.2989311 | 1.1932944  |
| sp P48047 ATPO_HUMAN    | -0.2967587 | 0.8235348  |
| sp Q9NYF8-2 BCLF1_HUMAN | -0.2948875 | 0.6070219  |
| sp Q15149-3 PLEC_HUMAN  | -0.2945995 | 0.656254   |
| sp P09543-2 CN37_HUMAN  | -0.2940807 | 1.1791906  |
| sp P24557-2 THAS_HUMAN  | -0.2901859 | 1.1932944  |
| sp P36542-2 ATPG_HUMAN  | -0.2888966 | 0.656254   |
| sp O14828-2 SCAM3_HUMAN | -0.2881165 | 0.5204253  |

|                          |            |            |
|--------------------------|------------|------------|
| sp Q03154-4 ACY1_HUMAN   | -0.2877178 | 0.91601294 |
| sp Q16836-3 HCDH_HUMAN   | -0.2875843 | 1.1505735  |
| sp Q10567-2 AP1B1_HUMAN  | -0.2871323 | 0.7061832  |
| sp O43615 TIM44_HUMAN    | -0.2865048 | 1.1932944  |
| sp P62701 RS4X_HUMAN     | -0.2864418 | 0.6298893  |
| sp Q14011-2 CIRBP_HUMAN  | -0.2850285 | 0.5204253  |
| sp Q9UBQ5 EIF3K_HUMAN    | -0.2834797 | 1.1932944  |
| sp A0A0C4DH31 HV118_HUMA | -0.2827778 | 0.656254   |
| sp Q93034 CUL5_HUMAN     | -0.281332  | 0.7827403  |
| sp P61204 ARF3_HUMAN     | -0.2800617 | 1.3006523  |
| sp P54819-2 KAD2_HUMAN   | -0.2785626 | 0.35795313 |
| sp O00483 NDUA4_HUMAN    | -0.2774773 | 0.7827403  |
| sp P48059-3 LIMS1_HUMAN  | -0.2769623 | 0.656254   |
| sp P02769 ALBU_BOVIN     | -0.2768211 | 0.0816602  |
| sp Q9H9B4 SFXN1_HUMAN    | -0.2764607 | 1.1932944  |
| sp Q08209-5 PP2BA_HUMAN  | -0.2752457 | 0          |
| sp O60832 DKC1_HUMAN     | -0.2713032 | 1.1932944  |
| sp Q96AY3 FKB10_HUMAN    | -0.2708492 | 0.6070219  |
| sp P55327-3 TPD52_HUMAN  | -0.2700539 | 0.7827403  |
| sp Q06278 AOXA_HUMAN     | -0.2694244 | 0.45033538 |
| sp Q15274 NADC_HUMAN     | -0.2693882 | 0.5204253  |
| sp Q9BTE1 DCTN5_HUMAN    | -0.2682991 | 1.1932944  |
| sp Q86W92-2 LIPB1_HUMAN  | -0.2679157 | 1.1932944  |
| sp P04440 DPB1_HUMAN     | -0.2678185 | 1.1932944  |
| sp P55809 SCOT1_HUMAN    | -0.2675724 | 0.35795313 |
| sp P38606 VATA_HUMAN     | -0.267026  | 0.77163273 |
| sp Q14498-2 RBM39_HUMAN  | -0.2666817 | 0.48520416 |
| sp Q32MZ4-3 LRRF1_HUMAN  | -0.2666359 | 0.45033538 |
| sp P21964-2 COMT_HUMAN   | -0.2663155 | 1.0992733  |
| sp Q9UN86-2 G3BP2_HUMAN  | -0.2636776 | 1.1932944  |
| sp P67775 PP2AA_HUMAN    | -0.2629433 | 0.656254   |
| sp P62495-2 ERF1_HUMAN   | -0.2626934 | 0.35795313 |
| sp Q9NX63 MIC19_HUMAN    | -0.2623463 | 1.1932944  |
| sp P48509 CD151_HUMAN    | -0.2620373 | 1.1932944  |
| sp P61601 NCALD_HUMAN    | -0.2614155 | 0.656254   |
| sp P02794 FRIH_HUMAN     | -0.2608013 | 1.1791906  |
| sp Q08170 SRSF4_HUMAN    | -0.2583561 | 0.656254   |
| sp Q9P1F3 ABRAL_HUMAN    | -0.257865  | 0.656254   |
| sp Q9NTX5-6 ECHD1_HUMAN  | -0.2578182 | 1.214352   |
| sp P62424 RL7A_HUMAN     | -0.257225  | 0.79861414 |
| sp P22894 MMP8_HUMAN     | -0.2565117 | 0.19149946 |
| sp Q13885 TBB2A_HUMAN    | -0.2559147 | 0.7827403  |
| sp O43865 SAHH2_HUMAN    | -0.2551737 | 0.91601294 |
| sp Q16777 H2A2C_HUMAN    | -0.2542992 | 0          |
| sp Q9UDY2-3 ZO2_HUMAN    | -0.2542629 | 0.19149946 |

|                         |            |            |
|-------------------------|------------|------------|
| sp P49903-2 SPS1_HUMAN  | -0.2540073 | 1.1505735  |
| sp Q13363-2 CTBP1_HUMAN | -0.2539043 | 1.1932944  |
| sp O60831 PRAF2_HUMAN   | -0.252573  | 0.91601294 |
| sp P29466-2 CASP1_HUMAN | -0.2521401 | 0.656254   |
| sp Q5TFE4 NT5D1_HUMAN   | -0.251194  | 1.1932944  |
| sp P29992 GNA11_HUMAN   | -0.2511463 | 1.1932944  |
| sp P41091 IF2G_HUMAN    | -0.2494392 | 0.95332193 |
| sp Q13976 KGP1_HUMAN    | -0.2494259 | 0          |
| sp P09601 HMOX1_HUMAN   | -0.2460861 | 0.40256184 |
| sp P62942 FKB1A_HUMAN   | -0.2459984 | 0.656254   |
| sp Q9Y371-2 SHLB1_HUMAN | -0.2413292 | 0          |
| sp Q8NBF2-2 NHLC2_HUMAN | -0.2408772 | 1.1932944  |
| sp Q96MM6 HS12B_HUMAN   | -0.2402744 | 1.214352   |
| sp E9PAV3 NACAM_HUMAN   | -0.2394524 | 1.1932944  |
| sp Q53T59 H1BP3_HUMAN   | -0.2387676 | 1.1932944  |
| sp Q9Y5M8 SRPRB_HUMAN   | -0.2384224 | 1.2941489  |
| sp O15127 SCAM2_HUMAN   | -0.2381058 | 0.7061832  |
| sp Q9BRR6-2 ADPGK_HUMAN | -0.2375755 | 0.7827403  |
| sp P12830 CADH1_HUMAN   | -0.2365055 | 0          |
| sp Q92769 HDAC2_HUMAN   | -0.2343254 | 0.656254   |
| sp Q00765 REEP5_HUMAN   | -0.2342224 | 1.1240381  |
| sp P61923 COPZ1_HUMAN   | -0.2338963 | 0.19149946 |
| sp Q9HCN8 SDF2L_HUMAN   | -0.2336655 | 1.1932944  |
| sp P28070 PSB4_HUMAN    | -0.2332211 | 0.6167118  |
| sp Q6UW68 TM205_HUMAN   | -0.2323494 | 1.1932944  |
| sp O60234 GMFG_HUMAN    | -0.2321491 | 1.1505735  |
| sp Q9Y376 CAB39_HUMAN   | -0.2310677 | 0.80804527 |
| sp P21912 SDHB_HUMAN    | -0.2263317 | 1.1505735  |
| sp P84085 ARF5_HUMAN    | -0.2257061 | 0.656254   |
| sp P24666 PPAC_HUMAN    | -0.2251511 | 0.7827403  |
| sp P80303-2 NUCB2_HUMAN | -0.2244511 | 0.8272904  |
| sp P17612 KAPCA_HUMAN   | -0.2240009 | 1.2095301  |
| sp Q96S97 MYADM_HUMAN   | -0.223917  | 1.1932944  |
| sp O94804 STK10_HUMAN   | -0.222559  | 1.1932944  |
| sp P04406 G3P_HUMAN     | -0.2209168 | 0.656254   |
| sp P15586-2 GNS_HUMAN   | -0.2201347 | 1.1505735  |
| sp Q8TD55 PKHO2_HUMAN   | -0.2199211 | 0          |
| sp P07741 APT_HUMAN     | -0.2184086 | 0.9968222  |
| sp Q9NR56-2 MBNL1_HUMAN | -0.2181892 | 1.1932944  |
| sp Q15008-4 PSMD6_HUMAN | -0.2180634 | 0.19149946 |
| sp P62879 GBB2_HUMAN    | -0.2164574 | 0.5111962  |
| sp P15529-10 MCP_HUMAN  | -0.2163391 | 0.656254   |
| sp P48739 PIPNB_HUMAN   | -0.2151375 | 0.45033538 |
| sp P39060-1 COIA1_HUMAN | -0.214695  | 0.95332193 |
| sp Q09028-3 RBBP4_HUMAN | -0.2142677 | 0.656254   |

|                         |            |            |
|-------------------------|------------|------------|
| sp P53618 COPB_HUMAN    | -0.2140293 | 1.203852   |
| sp P52790 HXK3_HUMAN    | -0.2136498 | 1.3006523  |
| sp O60547-2 GMDS_HUMAN  | -0.2132721 | 1.1505735  |
| sp Q06210-2 GFPT1_HUMAN | -0.2116852 | 1.3006523  |
| sp P60981 DEST_HUMAN    | -0.2109699 | 0.95332193 |
| sp Q99426 TBCB_HUMAN    | -0.2100678 | 1.0301651  |
| sp Q969V3-2 NCLN_HUMAN  | -0.2098198 | 0.91601294 |
| sp O43488 ARK72_HUMAN   | -0.2075615 | 0.7588735  |
| sp P08648 ITA5_HUMAN    | -0.2074471 | 0.91601294 |
| sp P98082-2 DAB2_HUMAN  | -0.2072916 | 1.1932944  |
| sp P06703 S10A6_HUMAN   | -0.2065983 | 0.7827403  |
| sp Q9Y3A3-3 PHOCN_HUMAN | -0.2054453 | 0          |
| sp P28799-3 GRN_HUMAN   | -0.2051048 | 0.09894868 |
| sp Q13177 PAK2_HUMAN    | -0.2049408 | 0.7827403  |
| sp P61457 PHS_HUMAN     | -0.2045317 | 0.7827403  |
| sp Q03519 TAP2_HUMAN    | -0.2044678 | 0.656254   |
| sp Q93084-2 AT2A3_HUMAN | -0.203949  | 0.7827403  |
| sp Q8N392 RHG18_HUMAN   | -0.2037029 | 1.1505735  |
| sp P62910 RL32_HUMAN    | -0.2034721 | 0.6070219  |
| sp Q9UBQ7 GRHPR_HUMAN   | -0.202879  | 1.2941489  |
| sp Q9NUJ1-3 ABHDA_HUMAN | -0.2025814 | 0          |
| sp P01782 HV309_HUMAN   | -0.2023468 | 0.656254   |
| sp O95571 ETHE1_HUMAN   | -0.201767  | 1.1791906  |
| sp P51688 SPHM_HUMAN    | -0.2012405 | 0.97209185 |
| sp Q96HD1 CREL1_HUMAN   | -0.2007523 | 0.45033538 |
| sp P30519 HMOX2_HUMAN   | -0.2004471 | 0.7827403  |
| sp Q9BT78 CSN4_HUMAN    | -0.1999245 | 0.7588735  |
| sp Q06136 KDSR_HUMAN    | -0.1997566 | 1.1932944  |
| sp Q9H4M9 EHD1_HUMAN    | -0.1997414 | 1.120602   |
| sp P62195 PRS8_HUMAN    | -0.1996803 | 0.45033538 |
| sp P60033 CD81_HUMAN    | -0.1996403 | 1.1932944  |
| sp Q14240-2 IF4A2_HUMAN | -0.1992703 | 0.8983557  |
| sp P12955 PEPD_HUMAN    | -0.1992645 | 0.29066643 |
| sp P20645 MPRD_HUMAN    | -0.1990089 | 1.0301651  |
| sp P62304 RUXE_HUMAN    | -0.1988516 | 1.1932944  |
| sp Q15819 UB2V2_HUMAN   | -0.1984062 | 0.656254   |
| sp Q14258 TRI25_HUMAN   | -0.1983757 | 0.5896263  |
| sp P42566 EPS15_HUMAN   | -0.1977463 | 1.1932944  |
| sp P16930 FAAA_HUMAN    | -0.1973105 | 0.656254   |
| sp P51178-2 PLCD1_HUMAN | -0.1958485 | 0.43633315 |
| sp P16422 EPCAM_HUMAN   | -0.1956978 | 1.1932944  |
| sp Q15637-2 SF01_HUMAN  | -0.1955147 | 1.1932944  |
| sp O43852-3 CALU_HUMAN  | -0.1949444 | 1.2095301  |
| sp Q13492-2 PICAL_HUMAN | -0.1944618 | 0.91601294 |
| sp Q9Y2X3 NOP58_HUMAN   | -0.1937084 | 0.65625405 |



|                         |            |            |
|-------------------------|------------|------------|
| sp P39059 COFA1_HUMAN   | -0.1934528 | 1.2095301  |
| sp P04424-2 ARLY_HUMAN  | -0.1929092 | 1.0645995  |
| sp P22307-8 NLTP_HUMAN  | -0.1916513 | 0.7061832  |
| sp Q9BW04 SARG_HUMAN    | -0.1914482 | 0.45033538 |
| sp Q53GQ0 DHB12_HUMAN   | -0.1910152 | 0.35795313 |
| sp P54727 RD23B_HUMAN   | -0.188427  | 0.7061832  |
| sp Q12792-3 TWF1_HUMAN  | -0.1879349 | 0.19149946 |
| sp O00487 PSDE_HUMAN    | -0.1874733 | 0.19149946 |
| sp P48163-2 MAOX_HUMAN  | -0.1873312 | 0.35795313 |
| sp P11498 PYC_HUMAN     | -0.1861687 | 0.61034113 |
| sp P39019 RS19_HUMAN    | -0.1854305 | 0.5204253  |
| sp P29972-2 AQP1_HUMAN  | -0.1840248 | 0.45033538 |
| sp Q92556 ELMO1_HUMAN   | -0.1821613 | 0.8983557  |
| sp Q9NZU5-2 LMCD1_HUMAN | -0.1821404 | 0.5886828  |
| sp P30626-2 SORCN_HUMAN | -0.1819267 | 0.68888646 |
| sp Q86U42-2 PABP2_HUMAN | -0.1816673 | 0.656254   |
| sp Q13232 NDK3_HUMAN    | -0.1813622 | 0.5111962  |
| sp P18583-10 SON_HUMAN  | -0.1809502 | 0.19149946 |
| sp Q709C8-3 VP13C_HUMAN | -0.1808586 | 1.1240381  |
| sp O94973-2 AP2A2_HUMAN | -0.1804142 | 1.1683742  |
| sp P26640 SYVC_HUMAN    | -0.1803227 | 0.6063746  |
| sp Q92747 ARC1A_HUMAN   | -0.1795769 | 0.656254   |
| sp Q8NF91-4 SYNE1_HUMAN | -0.1784315 | 0.45033538 |
| sp Q99436 PSB7_HUMAN    | -0.1773558 | 0.45033538 |
| sp PODJI8 SAA1_HUMAN    | -0.1772423 | 0          |
| sp Q6DN03 H2B2C_HUMAN   | -0.1756973 | 0          |
| sp P29400-2 CO4A5_HUMAN | -0.1752863 | 0          |
| sp P33316 DUT_HUMAN     | -0.1747952 | 1.1932944  |
| sp P55795 HNRH2_HUMAN   | -0.1734467 | 0.30372584 |
| sp Q96C86 DCPS_HUMAN    | -0.1717777 | 0.91601294 |
| sp O15372 EIF3H_HUMAN   | -0.1716538 | 0.5204253  |
| sp Q7Z7H5-3 TMED4_HUMAN | -0.1711483 | 0.19149946 |
| sp O94855-2 SC24D_HUMAN | -0.171133  | 0.19149946 |
| sp O75112-7 LDB3_HUMAN  | -0.1710606 | 1.1505735  |
| sp O75340-2 PDCD6_HUMAN | -0.1699657 | 0.09894868 |
| sp Q13838-2 DX39B_HUMAN | -0.1699028 | 0.1342476  |
| sp P12277 KCRB_HUMAN    | -0.169548  | 0.907945   |
| sp P13693 TCTP_HUMAN    | -0.1693268 | 0.7827403  |
| sp Q9Y4L1 HYOU1_HUMAN   | -0.1686974 | 1.1316391  |
| sp Q9UEY8 ADDG_HUMAN    | -0.1686935 | 0.98032326 |
| sp Q12797-10 ASPH_HUMAN | -0.168499  | 0.7022581  |
| sp P07305-2 H10_HUMAN   | -0.1684227 | 0          |
| sp O95833 CLIC3_HUMAN   | -0.1682072 | 0.09894868 |
| sp P49961-6 ENTP1_HUMAN | -0.1681671 | 0.35795313 |
| sp P62987 RL40_HUMAN    | -0.1680145 | 1.0634323  |

|                          |            |            |
|--------------------------|------------|------------|
| sp P31948 STIP1_HUMAN    | -0.1679916 | 0.656254   |
| sp P53602 MVD1_HUMAN     | -0.1670647 | 0.91601294 |
| sp P08238 HS90B_HUMAN    | -0.1670513 | 1.0242546  |
| sp P10644 KAP0_HUMAN     | -0.1660824 | 0.312067   |
| sp P25325-2 THTM_HUMAN   | -0.1654959 | 0.5692702  |
| sp O00764-2 PDXK_HUMAN   | -0.1635056 | 1.1240381  |
| sp Q9P2T1-2 GMPR2_HUMAN  | -0.1634846 | 0.48520416 |
| sp Q9UGI8-2 TES_HUMAN    | -0.1628361 | 0.7420189  |
| sp P11234-2 RALB_HUMAN   | -0.1617909 | 0.656254   |
| sp Q96DG6 CMBL_HUMAN     | -0.1608505 | 0.91601294 |
| sp P55145 MANF_HUMAN     | -0.1604424 | 1.1932944  |
| sp O14980 XPO1_HUMAN     | -0.1604137 | 0.91601294 |
| sp O94776 MTA2_HUMAN     | -0.1590519 | 0.8983557  |
| sp P33176 KINH_HUMAN     | -0.1586494 | 0.77163273 |
| sp O75608-2 LYPA1_HUMAN  | -0.1580792 | 1.1932944  |
| sp P22102 PUR2_HUMAN     | -0.1580219 | 0.6298893  |
| sp P56134-3 ATPK_HUMAN   | -0.157856  | 0          |
| sp Q96EP5-2 DAZP1_HUMAN  | -0.156723  | 0.45033538 |
| sp O75937 DNJC8_HUMAN    | -0.1562347 | 1.0485198  |
| sp P42167 LAP2B_HUMAN    | -0.1562157 | 1.1932944  |
| sp P23229-4 ITA6_HUMAN   | -0.1555119 | 1.1932944  |
| sp O95466-2 FMNL1_HUMAN  | -0.1554909 | 1.1932944  |
| sp P01892 1A02_HUMAN     | -0.1552296 | 0.35795313 |
| sp O95837 GNA14_HUMAN    | -0.1551476 | 0.656254   |
| sp P49720 PSB3_HUMAN     | -0.1549854 | 1.1791906  |
| sp P61026 RAB10_HUMAN    | -0.1540794 | 0.7827403  |
| sp Q9UBV8 PEF1_HUMAN     | -0.1538487 | 0.91601294 |
| sp Q9Y6A4 CFA20_HUMAN    | -0.1537018 | 0.45033538 |
| sp P30049 ATPD_HUMAN     | -0.1534405 | 1.1932944  |
| sp Q9NTK5 OLA1_HUMAN     | -0.1534195 | 0.19149946 |
| sp O60763-2 USO1_HUMAN   | -0.1532021 | 0.7414989  |
| sp Q9UNE7-2 CHIP_HUMAN   | -0.1530609 | 0.45033538 |
| sp P12268 IMDH2_HUMAN    | -0.151804  | 0.7827403  |
| sp P48147 PPCE_HUMAN     | -0.1506004 | 1.0645995  |
| sp O43681 ASNA_HUMAN     | -0.1501274 | 0.5204253  |
| sp P40306 PSB10_HUMAN    | -0.1498394 | 0.30372584 |
| sp Q9HAV0 GBB4_HUMAN     | -0.1489506 | 0          |
| sp P51692 STA5B_HUMAN    | -0.1483746 | 1.1932944  |
| sp P43243 MATR3_HUMAN    | -0.1482315 | 1.3006523  |
| sp Q9P2X0-2 DPM3_HUMAN   | -0.1475678 | 0.45033538 |
| sp Q9H299 SH3L3_HUMAN    | -0.1471252 | 1.1932944  |
| sp P42126-2 ECI1_HUMAN   | -0.1458321 | 1.1932944  |
| sp Q13557-12 KCC2D_HUMAN | -0.1448746 | 0.9533461  |
| sp P62314 SMD1_HUMAN     | -0.1448326 | 0.45033538 |
| sp Q8WVM8 SCFD1_HUMAN    | -0.144371  | 0.17511293 |

|                         |            |            |
|-------------------------|------------|------------|
| sp P23588 IF4B_HUMAN    | -0.1432781 | 0.8983557  |
| sp Q14914-2 PTGR1_HUMAN | -0.1431732 | 0.30372584 |
| sp Q96C19 EFHD2_HUMAN   | -0.143158  | 0.7061832  |
| sp Q8NCW5 NNRE_HUMAN    | -0.1414566 | 0.5111962  |
| sp Q96BM9 ARL8A_HUMAN   | -0.1412468 | 0.656254   |
| sp P54652 HSP72_HUMAN   | -0.1402931 | 0.35795313 |
| sp P20591 MX1_HUMAN     | -0.1402531 | 0.95332193 |
| sp Q92598-2 HS105_HUMAN | -0.139782  | 0.656254   |
| sp Q14141-2 SEPT6_HUMAN | -0.1396103 | 0.656254   |
| sp O15067 PUR4_HUMAN    | -0.1395721 | 0.7827403  |
| sp P10412 H14_HUMAN     | -0.1390114 | 0          |
| sp P55010 IF5_HUMAN     | -0.1388874 | 0.40256184 |
| sp P48449-3 ERG7_HUMAN  | -0.1385498 | 1.0485198  |
| sp Q9NY33 DPP3_HUMAN    | -0.138422  | 0.8235348  |
| sp Q9BZE9-2 ASPC1_HUMAN | -0.1377735 | 0          |
| sp Q7L5N1 CSN6_HUMAN    | -0.1376991 | 0.7827403  |
| sp Q9H0W9-2 CK054_HUMAN | -0.1364155 | 0.4075265  |
| sp P30520 PURA2_HUMAN   | -0.1362248 | 0.34323573 |
| sp O14617-4 AP3D1_HUMAN | -0.1359825 | 0.45033538 |
| sp Q9NZB2-6 F120A_HUMAN | -0.135891  | 1.1932944  |
| sp P01624 KV315_HUMAN   | -0.1354828 | 0.7827403  |
| sp Q9NZL9 MAT2B_HUMAN   | -0.1351738 | 0.45563722 |
| sp P47985 UCRI_HUMAN    | -0.1349945 | 0.2178309  |
| sp Q86Y82 STX12_HUMAN   | -0.1349897 | 0.26737198 |
| sp Q9UBT2 SAE2_HUMAN    | -0.1345139 | 0.7588735  |
| sp P63241 IF5A1_HUMAN   | -0.1343765 | 0.656254   |
| sp P30466 1B18_HUMAN    | -0.1328392 | 0.656254   |
| sp O60504-2 VINEX_HUMAN | -0.132267  | 0.95332193 |
| sp P61018-2 RAB4B_HUMAN | -0.1320362 | 0.656254   |
| sp Q9Y224 RTRAF_HUMAN   | -0.1301918 | 0.4075265  |
| sp Q13404 UB2V1_HUMAN   | -0.1287079 | 0.2178309  |
| sp P01920 DQB1_HUMAN    | -0.1284866 | 0.19149946 |
| sp Q9BVC6 TM109_HUMAN   | -0.1279049 | 0.5204253  |
| sp P05166-2 PCCB_HUMAN  | -0.1274796 | 0.79861414 |
| sp P61758 PFD3_HUMAN    | -0.1272259 | 0.19149946 |
| sp Q6NVY1 HIBCH_HUMAN   | -0.1270752 | 0.5111962  |
| sp Q9UJZ1-2 STML2_HUMAN | -0.1270533 | 0.91601294 |
| sp P31942-2 HNRH3_HUMAN | -0.1265583 | 0.65625405 |
| sp P84098 RL19_HUMAN    | -0.1256638 | 0.19149946 |
| sp P02792 FRIL_HUMAN    | -0.1256409 | 1.0353775  |
| sp P14618-2 KPYM_HUMAN  | -0.1256104 | 0.2178309  |
| sp P55290-4 CAD13_HUMAN | -0.1243629 | 0.21439649 |
| sp Q14019 COTL1_HUMAN   | -0.1239624 | 0.33495146 |
| sp P06310 KV230_HUMAN   | -0.1235008 | 0          |
| sp Q53GG5-2 PDLI3_HUMAN | -0.1234474 | 0.40256184 |

|                         |            |            |
|-------------------------|------------|------------|
| sp P46779-2 RL28_HUMAN  | -0.1230145 | 1.0485198  |
| sp P12111-2 CO6A3_HUMAN | -0.1228142 | 0.7217418  |
| sp Q13464 ROCK1_HUMAN   | -0.122345  | 0.28516325 |
| sp P12004 PCNA_HUMAN    | -0.1220894 | 0.45033538 |
| sp Q92522 H1X_HUMAN     | -0.1218967 | 0          |
| sp O00429-6 DNM1L_HUMAN | -0.1207981 | 0.87291557 |
| sp P08237-3 PFKAM_HUMAN | -0.1199608 | 0.09339783 |
| sp P13928 ANXA8_HUMAN   | -0.1195564 | 0          |
| sp Q15029-2 U5S1_HUMAN  | -0.1193247 | 0.59872687 |
| sp O60814 H2B1K_HUMAN   | -0.1183243 | 0          |
| sp B5ME19 EIFCL_HUMAN   | -0.1172295 | 0.5204253  |
| sp Q9BZZ5-5 API5_HUMAN  | -0.1168966 | 0.56808305 |
| sp Q969H8 MYDGF_HUMAN   | -0.1168385 | 0.7061832  |
| sp Q8TAT6-2 NPL4_HUMAN  | -0.1159229 | 0.45563722 |
| sp O75503 CLN5_HUMAN    | -0.1155834 | 0.91601294 |
| sp O43396 TXNL1_HUMAN   | -0.1155701 | 0          |
| sp Q6YHK3 CD109_HUMAN   | -0.1146965 | 0.5176613  |
| sp Q16774 KGUA_HUMAN    | -0.1146774 | 0          |
| sp Q9BUF5 TBB6_HUMAN    | -0.1144447 | 0.8983557  |
| sp Q13243-3 SRSF5_HUMAN | -0.1143532 | 0.656254   |
| sp Q04323-2 UBXN1_HUMAN | -0.1136723 | 0          |
| sp P16298-4 PP2BB_HUMAN | -0.1136379 | 0.312067   |
| sp Q15417 CNN3_HUMAN    | -0.1133099 | 0.91601294 |
| sp P50991-2 TCPD_HUMAN  | -0.1132774 | 1.1054204  |
| sp P61006 RAB8A_HUMAN   | -0.1130486 | 0.7827403  |
| sp P30044-2 PRDX5_HUMAN | -0.112855  | 0.656254   |
| sp Q9HC38 GLOD4_HUMAN   | -0.1125526 | 0.7957244  |
| sp P50135 HNMT_HUMAN    | -0.1125431 | 0          |
| sp Q16853 AOC3_HUMAN    | -0.1110916 | 1.2474942  |
| sp O95861-4 BPNT1_HUMAN | -0.1105804 | 0.6298893  |
| sp Q7Z4W1 DCXR_HUMAN    | -0.1100464 | 0.8983557  |
| sp O95302-3 FKBP9_HUMAN | -0.109684  | 0          |
| sp O15260-2 SURF4_HUMAN | -0.1095867 | 0.19149946 |
| sp P68400 CSK21_HUMAN   | -0.1087608 | 1.1505735  |
| sp Q969G5 CAVN3_HUMAN   | -0.1087341 | 0.5204253  |
| sp P69891 HBG1_HUMAN    | -0.108448  | 0.656254   |
| sp P09619 PGFRB_HUMAN   | -0.1078491 | 0.35795313 |
| sp P28072 PSB6_HUMAN    | -0.1066074 | 0.35795313 |
| sp Q93077 H2A1C_HUMAN   | -0.105978  | 0          |
| sp P35754 GLRX1_HUMAN   | -0.1048698 | 0.48520416 |
| sp Q04760-2 LGUL_HUMAN  | -0.1039925 | 0.5111962  |
| sp P46108 CRK_HUMAN     | -0.1039391 | 0.03367973 |
| sp P37108 SRP14_HUMAN   | -0.1037502 | 0.19149946 |
| sp P60983 GMFB_HUMAN    | -0.1037102 | 1.1505735  |
| sp Q3LXA3 TKFC_HUMAN    | -0.1034699 | 0.55270666 |

|                          |            |            |
|--------------------------|------------|------------|
| sp O00391 QSOX1_HUMAN    | -0.1032333 | 0.45033538 |
| sp P12814 ACTN1_HUMAN    | -0.1027527 | 0          |
| sp Q9H4G4 GAPR1_HUMAN    | -0.1022358 | 0.35795313 |
| sp P17980 PRS6A_HUMAN    | -0.1019783 | 0.42646354 |
| sp Q96CN7 ISOC1_HUMAN    | -0.1017532 | 0.48520416 |
| sp Q8N163-2 CCAR2_HUMAN  | -0.1017532 | 0.91601294 |
| sp P52306-4 GDS1_HUMAN   | -0.1003513 | 1.1505735  |
| sp Q96CX2 KCD12_HUMAN    | -0.0999985 | 0.89178735 |
| sp P16070-7 CD44_HUMAN   | -0.0997524 | 0          |
| sp O60716-14 CTND1_HUMAN | -0.098608  | 0.2178309  |
| sp P58107 EPIPL_HUMAN    | -0.0985556 | 0.63371044 |
| sp Q9Y265 RUVB1_HUMAN    | -0.0983048 | 0.23541966 |
| sp P15374 UCLH3_HUMAN    | -0.0973291 | 0.5692702  |
| sp O60664-4 PLIN3_HUMAN  | -0.0967236 | 0.20467198 |
| sp P46821 MAP1B_HUMAN    | -0.0963802 | 0.1342476  |
| sp P51665 PSMD7_HUMAN    | -0.0960712 | 0.45033538 |
| sp O60313-10 OPA1_HUMAN  | -0.09585   | 0.19149946 |
| sp Q6UVK1 CSPG4_HUMAN    | -0.0949173 | 0.56808305 |
| sp P62333 PRS10_HUMAN    | -0.0940266 | 0.7498006  |
| sp P62913-2 RL11_HUMAN   | -0.0925903 | 0.7827403  |
| sp P30533 AMRP_HUMAN     | -0.0924568 | 0.84879977 |
| sp Q13642-1 FHL1_HUMAN   | -0.0921707 | 0.656254   |
| sp P22033 MUTA_HUMAN     | -0.0916233 | 0          |
| sp P01112 RASH_HUMAN     | -0.0913563 | 0          |
| sp P78417-2 GSTO1_HUMAN  | -0.0899181 | 0.656254   |
| sp O00232 PSD12_HUMAN    | -0.0898552 | 0.40256184 |
| sp Q96FN4 CPNE2_HUMAN    | -0.0898476 | 0          |
| sp P61225 RAP2B_HUMAN    | -0.089756  | 0.45033538 |
| sp Q08945 SSRP1_HUMAN    | -0.0893211 | 1.0076748  |
| sp Q5R3I4 TTC38_HUMAN    | -0.088192  | 0.19149946 |
| sp P11217 PYGM_HUMAN     | -0.0876007 | 0.656254   |
| sp P45974-2 UBP5_HUMAN   | -0.0874996 | 0.26295313 |
| sp Q9NZK5 ADA2_HUMAN     | -0.0873947 | 0.19149946 |
| sp Q92499 DDX1_HUMAN     | -0.0867767 | 0.83646035 |
| sp Q8NHV1 GIMA7_HUMAN    | -0.0859146 | 0.45033538 |
| sp P36873-2 PP1G_HUMAN   | -0.0839615 | 0.45033538 |
| sp Q13126-2 MTAP_HUMAN   | -0.0838776 | 0.6509351  |
| sp P09429 HMGB1_HUMAN    | -0.0836945 | 0.19149946 |
| sp O75955 FLOT1_HUMAN    | -0.0833721 | 0.94599336 |
| sp O75306-2 NDUS2_HUMAN  | -0.0824375 | 0.30372584 |
| sp Q08722-2 CD47_HUMAN   | -0.0823841 | 0.7061832  |
| sp P11216 PYGB_HUMAN     | -0.0821037 | 0.8321823  |
| sp P32456 GBP2_HUMAN     | -0.0815258 | 0.45033538 |
| sp P39687 AN32A_HUMAN    | -0.0812569 | 0.09894868 |
| sp P02675 FIBB_HUMAN     | -0.0810394 | 0.8652954  |

|                         |            |            |
|-------------------------|------------|------------|
| sp A0FGR8-2 ESYT2_HUMAN | -0.0804291 | 0.30372584 |
| sp P67809 YBOX1_HUMAN   | -0.0803471 | 0          |
| sp Q9HBL0 TENS1_HUMAN   | -0.0800304 | 0.06210651 |
| sp P28066 PSA5_HUMAN    | -0.0798359 | 0.4075265  |
| sp P57737-4 CORO7_HUMAN | -0.0789976 | 0.45033538 |
| sp P27694 RFA1_HUMAN    | -0.0788193 | 0.33495146 |
| sp P48681 NEST_HUMAN    | -0.0788136 | 0.19818917 |
| sp Q9BRF8-2 CPPED_HUMAN | -0.078331  | 0.2178309  |
| sp P62753 RS6_HUMAN     | -0.0783157 | 0.35795313 |
| sp O00571-2 DDX3X_HUMAN | -0.0779276 | 0.7061832  |
| sp Q16181-2 SEPT7_HUMAN | -0.0776691 | 0.880485   |
| sp P61088 UBE2N_HUMAN   | -0.076849  | 0.19149946 |
| sp P21399 ACOC_HUMAN    | -0.0766859 | 0.3852666  |
| sp Q9BX97 PLVAP_HUMAN   | -0.076088  | 0          |
| sp P14174 MIF_HUMAN     | -0.0757904 | 0          |
| sp P22748 CAH4_HUMAN    | -0.0757198 | 0.4075265  |
| sp P02746 C1QB_HUMAN    | -0.0736313 | 0          |
| sp Q14108 SCRB2_HUMAN   | -0.073513  | 0.7827403  |
| sp P50502 F10A1_HUMAN   | -0.0731144 | 0.46530083 |
| sp Q01955 CO4A3_HUMAN   | -0.0726223 | 1.1932944  |
| sp Q96M27-3 PRRC1_HUMAN | -0.0716572 | 0.7827403  |
| sp P0DP25 CALM3_HUMAN   | -0.0702477 | 0.93112767 |
| sp P61803 DAD1_HUMAN    | -0.0700283 | 0          |
| sp Q9BTV4 TMM43_HUMAN   | -0.0700111 | 0.4075265  |
| sp P02763 A1AG1_HUMAN   | -0.0698643 | 0.43633315 |
| sp O15031 PLXB2_HUMAN   | -0.0693684 | 0.34244674 |
| sp Q07954 LRP1_HUMAN    | -0.0689468 | 0.7911032  |
| sp Q13247-3 SRSF6_HUMAN | -0.0688553 | 0.19149946 |
| sp P17987 TCPA_HUMAN    | -0.0684605 | 0.6385048  |
| sp Q16787-3 LAMA3_HUMAN | -0.0684452 | 0.656254   |
| sp P42785-2 PCP_HUMAN   | -0.068325  | 0          |
| sp Q15436 SC23A_HUMAN   | -0.0682869 | 0.21439649 |
| sp P01034 CYTC_HUMAN    | -0.0682812 | 0.7827403  |
| sp Q9Y2Q5 LTOR2_HUMAN   | -0.0674095 | 0          |
| sp Q9UK22 FBX2_HUMAN    | -0.0673103 | 0          |
| sp Q15046 SYK_HUMAN     | -0.0667667 | 0          |
| sp P62937 PIIA_HUMAN    | -0.0661545 | 0          |
| sp Q92896-2 GSLG1_HUMAN | -0.0656052 | 0.05634482 |
| sp O00754-2 MA2B1_HUMAN | -0.0645161 | 0.8983557  |
| sp P48637 GSHB_HUMAN    | -0.0641727 | 0.5176613  |
| sp P27487 DPP4_HUMAN    | -0.0626812 | 0.06291623 |
| sp Q86WV6 STING_HUMAN   | -0.0625286 | 0.09894868 |
| sp P08571 CD14_HUMAN    | -0.0617332 | 0.6298893  |
| sp Q9Y490 TLN1_HUMAN    | -0.0614738 | 0.8146241  |
| sp P04632 CPNS1_HUMAN   | -0.0609732 | 0.19149946 |

|                         |            |            |
|-------------------------|------------|------------|
| sp P17174 AATC_HUMAN    | -0.0603943 | 0.30819008 |
| sp P26599-2 PTBP1_HUMAN | -0.0603008 | 0.05145278 |
| sp P27338 AOFB_HUMAN    | -0.0601273 | 0.30819008 |
| sp Q7LG56-6 RIR2B_HUMAN | -0.0587978 | 0.19149946 |
| sp Q96HN2-2 SAHH3_HUMAN | -0.0583954 | 0          |
| sp P55209-2 NP1L1_HUMAN | -0.0568962 | 0          |
| sp O75367-2 H2AY_HUMAN  | -0.0566921 | 0.56808305 |
| sp Q12765 SCRN1_HUMAN   | -0.0563622 | 0.1342476  |
| sp P02751-15 FINC_HUMAN | -0.0562725 | 0.656254   |
| sp Q08380 LG3BP_HUMAN   | -0.0555229 | 0.12897664 |
| sp O00592-2 PODXL_HUMAN | -0.0545273 | 0.45033538 |
| sp Q16643-3 DREB_HUMAN  | -0.0532427 | 0.35193655 |
| sp P06748-2 NPM_HUMAN   | -0.0523176 | 0.35795313 |
| sp O15498-2 YKT6_HUMAN  | -0.0521202 | 0.19149946 |
| sp P06756-3 ITAV_HUMAN  | -0.0512848 | 0.84879977 |
| sp O14787-2 TNPO2_HUMAN | -0.0511227 | 0          |
| sp P23528 COF1_HUMAN    | -0.0489273 | 0.4490988  |
| sp O15400-2 STX7_HUMAN  | -0.0487576 | 0.33495146 |
| sp P41250 GARS_HUMAN    | -0.0481272 | 0.40223262 |
| sp P02679-2 FIBG_HUMAN  | -0.0480232 | 0.14652808 |
| sp P01011 AACT_HUMAN    | -0.0472126 | 0.37277833 |
| sp Q9Y3B3 TMED7_HUMAN   | -0.0470943 | 0          |
| sp O14786 NRP1_HUMAN    | -0.0468578 | 0.19149946 |
| sp P62857 RS28_HUMAN    | -0.0466805 | 0.2178309  |
| sp P58546 MTPN_HUMAN    | -0.0463295 | 0.2178309  |
| sp Q00796 DHOS_HUMAN    | -0.0456276 | 0.09894868 |
| sp Q15005 SPCS2_HUMAN   | -0.045496  | 0.35795313 |
| sp P49755 TMEDA_HUMAN   | -0.0454559 | 0.06291623 |
| sp Q9HCB6 SPON1_HUMAN   | -0.0443592 | 0.04454162 |
| sp Q9Y696 CLIC4_HUMAN   | -0.0437889 | 0.06842031 |
| sp Q9Y3A5 SBDS_HUMAN    | -0.0437851 | 0.52598757 |
| sp Q9C0B1 FTO_HUMAN     | -0.0436525 | 0.19149946 |
| sp O60884 DNJA2_HUMAN   | -0.0432282 | 0.6298893  |
| sp P25787 PSA2_HUMAN    | -0.0430298 | 0.02662771 |
| sp P11279 LAMP1_HUMAN   | -0.0427322 | 0          |
| sp O60825-2 F262_HUMAN  | -0.0424061 | 0          |
| sp Q9NP79 VTA1_HUMAN    | -0.0423431 | 0.09894868 |
| sp Q92817 EVPL_HUMAN    | -0.0422859 | 0.6760564  |
| sp Q9UKK9 NUDT5_HUMAN   | -0.04212   | 0          |
| sp Q9NRN5-2 OLFL3_HUMAN | -0.0406208 | 0.01311907 |
| sp P36543-2 VATE1_HUMAN | -0.0402813 | 0.2178309  |
| sp Q92542 NICA_HUMAN    | -0.0396767 | 0.2178309  |
| sp Q16401-2 PSMD5_HUMAN | -0.0393124 | 0.04454162 |
| sp O95336 6PGL_HUMAN    | -0.0392723 | 0.3005443  |
| sp P01619 KV320_HUMAN   | -0.0391617 | 0.656254   |

|                         |            |            |
|-------------------------|------------|------------|
| sp Q9UHX1-6 PUF60_HUMAN | -0.0387383 | 0.35795313 |
| sp Q5JRX3-3 PREP_HUMAN  | -0.0387115 | 0.19149946 |
| sp Q92900-2 RENT1_HUMAN | -0.0366135 | 0.10017801 |
| sp Q9NUQ9 FA49B_HUMAN   | -0.0364056 | 0.09894868 |
| sp Q63ZY3-3 KANK2_HUMAN | -0.0360184 | 0.56808305 |
| sp P50225 ST1A1_HUMAN   | -0.0357857 | 0          |
| sp O76041-2 NEBL_HUMAN  | -0.0355339 | 0          |
| sp P61201-2 CSN2_HUMAN  | -0.0346813 | 0.19149946 |
| sp Q9P0V9-2 SEP10_HUMAN | -0.0346298 | 0.23541966 |
| sp P23219-2 PGH1_HUMAN  | -0.0342808 | 0.30372584 |
| sp Q5EBM0 CMPK2_HUMAN   | -0.0341148 | 0.5204253  |
| sp Q02952-2 AKA12_HUMAN | -0.0337563 | 0          |
| sp Q08379 GOGA2_HUMAN   | -0.0328751 | 0          |
| sp P43686 PRS6B_HUMAN   | -0.0327091 | 0.4490988  |
| sp P23497 SP100_HUMAN   | -0.0326767 | 0          |
| sp P13987-2 CD59_HUMAN  | -0.0318527 | 0.35795313 |
| sp Q99598 TSNAX_HUMAN   | -0.0315723 | 0.28516325 |
| sp P49721 PSB2_HUMAN    | -0.0301971 | 0.312067   |
| sp P05388 RLA0_HUMAN    | -0.0294781 | 0.04707252 |
| sp Q9UBC2-2 EP15R_HUMAN | -0.0288162 | 0.19149946 |
| sp Q12882 DPYD_HUMAN    | -0.0286884 | 0          |
| sp O75964 ATP5L_HUMAN   | -0.0272026 | 0.19149946 |
| sp P25685-2 DNJB1_HUMAN | -0.0267715 | 0          |
| sp O75347 TBCA_HUMAN    | -0.0266953 | 0.09894868 |
| sp P30085 KCY_HUMAN     | -0.0253906 | 0.09894868 |
| sp O15145 ARPC3_HUMAN   | -0.0247612 | 0.09894868 |
| sp P09871 C1S_HUMAN     | -0.0239124 | 0.5204253  |
| sp P28074 PSB5_HUMAN    | -0.0237255 | 0.26737198 |
| sp P10599-2 THIO_HUMAN  | -0.0228691 | 0.06291623 |
| sp P21333-2 FLNA_HUMAN  | -0.020813  | 0.18494359 |
| sp Q93052 LPP_HUMAN     | -0.02005   | 0.02388411 |
| sp P61020 RAB5B_HUMAN   | -0.0198841 | 0.2178309  |
| sp O75915 PRAF3_HUMAN   | -0.0194235 | 0.09894868 |
| sp P04275 VWF_HUMAN     | -0.0189667 | 0.07378665 |
| sp P22352 GPX3_HUMAN    | -0.0188541 | 0.09894868 |
| sp Q9BS40 LXN_HUMAN     | -0.0188084 | 0.21439649 |
| sp Q15661 TRYB1_HUMAN   | -0.0187874 | 0.356152   |
| sp Q9C0E8-4 LNP_HUMAN   | -0.0175114 | 0.19149946 |
| sp Q9UJS0-2 CMC2_HUMAN  | -0.0174141 | 0          |
| sp Q86UX2-2 ITIH5_HUMAN | -0.0167999 | 0.19149946 |
| sp Q13596-2 SNX1_HUMAN  | -0.0166435 | 0          |
| sp P02462 CO4A1_HUMAN   | -0.0165691 | 0.09894868 |
| sp P27918 PROP_HUMAN    | -0.0164557 | 0.19149946 |
| sp P27695 APEX1_HUMAN   | -0.016036  | 0          |
| sp Q9UNZ2-5 NSF1C_HUMAN | -0.0160103 | 0.14927356 |



|                         |            |            |
|-------------------------|------------|------------|
| sp Q15833-2 STXB2_HUMAN | -0.0159073 | 0          |
| sp Q96BW5-2 PTER_HUMAN  | -0.0146046 | 0          |
| sp Q8WU39 MZB1_HUMAN    | -0.0136776 | 0.06986027 |
| sp Q86VP6 CAND1_HUMAN   | -0.011982  | 0.28186345 |
| sp Q9UJU6-2 DBNL_HUMAN  | -0.0116386 | 0.06291623 |
| sp P0DP03 HV335_HUMAN   | -0.0105858 | 0          |
| sp Q9UBW8 CSN7A_HUMAN   | -0.0104313 | 0.09894868 |
| sp Q15257-2 PTPA_HUMAN  | -0.0084991 | 0.09339783 |
| sp Q99961-3 SH3G1_HUMAN | -0.008419  | 0          |
| sp Q6WCQ1-2 MPRIP_HUMAN | -0.0082731 | 0.08077049 |
| sp P62070-4 RRAS2_HUMAN | -0.0076199 | 0          |
| sp Q14112-2 NID2_HUMAN  | -0.0056038 | 0.368128   |
| sp Q16527 CSR2_HUMAN    | -0.0054531 | 0.2178309  |
| sp O60437 PEPL_HUMAN    | -0.0052338 | 0.19728164 |
| sp Q15075 EEA1_HUMAN    | -0.0048962 | 0.10258728 |
| sp O14950 ML12B_HUMAN   | -0.0048389 | 0.40256184 |
| sp O75489 NDUS3_HUMAN   | -0.0045185 | 0.06291623 |
| sp Q9Y2B0 CNPY2_HUMAN   | -0.0042181 | 0.35795313 |
| sp Q9UI12-2 VATH_HUMAN  | -0.0021458 | 0.14672586 |
| sp P30086 PEBP1_HUMAN   | -0.0019226 | 0.02174174 |
| sp P51636-2 CAV2_HUMAN  | -8.16E-04  | 0          |
| sp Q6DKJ4 NXN_HUMAN     | 1.56E-04   | 0          |
| sp Q92930 RAB8B_HUMAN   | 0.00184631 | 0          |
| sp Q99439 CNN2_HUMAN    | 0.00239372 | 0.06842031 |
| sp P61970 NTF2_HUMAN    | 0.00253868 | 0          |
| sp Q09666 AHNK_HUMAN    | 0.00361061 | 0.57329684 |
| sp P62736 ACTA_HUMAN    | 0.00377464 | 0          |
| sp P62191-2 PRS4_HUMAN  | 0.00509262 | 0.09894868 |
| sp P22105-1 TENX_HUMAN  | 0.00634766 | 0.00778498 |
| sp P07360 CO8G_HUMAN    | 0.00676537 | 0.19149946 |
| sp Q14192 FHL2_HUMAN    | 0.00680923 | 0.5692702  |
| sp Q13813-2 SPTN1_HUMAN | 0.00701523 | 0          |
| sp P07942 LAMB1_HUMAN   | 0.00707722 | 0.01542275 |
| sp P01780 HV307_HUMAN   | 0.00754166 | 0          |
| sp Q04837 SSBP_HUMAN    | 0.00865555 | 0.19149946 |
| sp O75368 SH3L1_HUMAN   | 0.00933838 | 0          |
| sp P05387 RLA2_HUMAN    | 0.00959587 | 0.19149946 |
| sp P30512 1A29_HUMAN    | 0.01011658 | 0.09894868 |
| sp P23193-2 TCEA1_HUMAN | 0.011343   | 0.1558116  |
| sp Q14980-2 NUMA1_HUMAN | 0.01163864 | 0.3425803  |
| sp P13798 ACPH_HUMAN    | 0.01165581 | 0.0315703  |
| sp O60506-3 HNRPQ_HUMAN | 0.0119915  | 0.1342476  |
| sp P35637-2 FUS_HUMAN   | 0.01230907 | 0.45033538 |
| sp P09104-2 ENOG_HUMAN  | 0.0123291  | 0.5832693  |
| sp Q9NR12-2 PDLI7_HUMAN | 0.01262283 | 0.06986027 |

|                         |            |            |
|-------------------------|------------|------------|
| sp P48643 TCPE_HUMAN    | 0.01421928 | 0.45546502 |
| sp O14974-3 MYPT1_HUMAN | 0.01571274 | 0.02174174 |
| sp P35858-2 ALS_HUMAN   | 0.01775169 | 0.19149946 |
| sp P52888 THOP1_HUMAN   | 0.01780129 | 0          |
| sp Q14254 FLOT2_HUMAN   | 0.01851463 | 0          |
| sp Q9Y639-4 NPTN_HUMAN  | 0.01865196 | 0          |
| sp P08708 RS17_HUMAN    | 0.01921463 | 0.4075265  |
| sp Q9Y6W5 WASF2_HUMAN   | 0.02006722 | 0.35795313 |
| sp P62633-3 CNBP_HUMAN  | 0.02074051 | 0          |
| sp Q99497 PARK7_HUMAN   | 0.02090073 | 0.26737198 |
| sp P35611-2 ADDA_HUMAN  | 0.02112198 | 0.33495146 |
| sp Q6NY19-2 KANK3_HUMAN | 0.02114677 | 0.19149946 |
| sp Q07960 RHG01_HUMAN   | 0.02182198 | 0.11949348 |
| sp Q08431 MFGM_HUMAN    | 0.02196121 | 0          |
| sp P54578-3 UBP14_HUMAN | 0.0220871  | 0          |
| sp Q9NRV9 HEBP1_HUMAN   | 0.02254677 | 0.21439649 |
| sp Q13561-2 DCTN2_HUMAN | 0.02370834 | 0.2565741  |
| sp P40261 NNMT_HUMAN    | 0.02425766 | 0.28516325 |
| sp P01859 IGHG2_HUMAN   | 0.02439117 | 0.41804093 |
| sp P10301 RRAS_HUMAN    | 0.02493668 | 0.09894868 |
| sp P09382 LEG1_HUMAN    | 0.02534676 | 0.31741163 |
| sp P01591 IGJ_HUMAN     | 0.0254364  | 0          |
| sp Q7Z4H8 PLGT3_HUMAN   | 0.02618408 | 0          |
| sp P31937 3HIDH_HUMAN   | 0.02751541 | 0.35795313 |
| sp Q13630 FCL_HUMAN     | 0.02753067 | 0.19149946 |
| sp Q6ZVM7-3 TM1L2_HUMAN | 0.0280714  | 0          |
| sp Q6UWY5 OLFL1_HUMAN   | 0.02905464 | 0.16702904 |
| sp P46783 RS10_HUMAN    | 0.03151417 | 0.45033538 |
| sp Q15063-3 POSTN_HUMAN | 0.03199577 | 0.19149946 |
| sp Q9UNS2 CSN3_HUMAN    | 0.03209686 | 0.656254   |
| sp Q16630-2 CPSF6_HUMAN | 0.03211594 | 0.2178309  |
| sp Q9UPN3 MACF1_HUMAN   | 0.03284073 | 0.4488957  |
| sp O43294 TGFI1_HUMAN   | 0.03372955 | 0          |
| sp O43790 KRT86_HUMAN   | 0.03388023 | 0          |
| sp Q15121 PEA15_HUMAN   | 0.03424835 | 0.2178309  |
| sp O95865 DDAH2_HUMAN   | 0.03450966 | 0.12054814 |
| sp P06753-2 TPM3_HUMAN  | 0.03492355 | 0.19149946 |
| sp P12270 TPR_HUMAN     | 0.03521729 | 0.5368848  |
| sp P67936-2 TPM4_HUMAN  | 0.03581619 | 0.2178309  |
| sp Q00341-2 VIGLN_HUMAN | 0.03590775 | 0.02662771 |
| sp O00151 PDLI1_HUMAN   | 0.0371666  | 0.09851671 |
| sp O15296 LX15B_HUMAN   | 0.03783035 | 0.06291623 |
| sp P61224 RAP1B_HUMAN   | 0.03798485 | 0          |
| sp P0CG38 POTEI_HUMAN   | 0.03869247 | 0          |
| sp O14791-2 APOL1_HUMAN | 0.03940201 | 0          |

|                           |            |            |
|---------------------------|------------|------------|
| sp P40123-2 CAP2_HUMAN    | 0.03953934 | 0          |
| sp Q9UPQ0 LIMC1_HUMAN     | 0.03980064 | 0.02174174 |
| sp P22392-2 NDKB_HUMAN    | 0.04022026 | 0.84879977 |
| sp P12110 CO6A2_HUMAN     | 0.04149437 | 0.79584783 |
| sp P54802 ANAG_HUMAN      | 0.04163933 | 0          |
| sp Q04446 GLGB_HUMAN      | 0.04226017 | 0.7588735  |
| sp Q15746-2 MYLK_HUMAN    | 0.04256249 | 0.8092523  |
| sp Q13867 BLMH_HUMAN      | 0.04291534 | 0          |
| sp P35555 FBN1_HUMAN      | 0.04330063 | 0.1454734  |
| sp Q6PCB0 VWA1_HUMAN      | 0.04338646 | 0.09894868 |
| sp Q9HB71 CYBP_HUMAN      | 0.04428864 | 0.312067   |
| sp Q13526 PIN1_HUMAN      | 0.04504013 | 0          |
| sp Q6IAA8 LTOR1_HUMAN     | 0.04594994 | 0.19149946 |
| sp Q8WXX5 DNJC9_HUMAN     | 0.04597855 | 0.19149946 |
| sp Q9H8L6 MMRN2_HUMAN     | 0.04598808 | 0.19149946 |
| sp P00736 C1R_HUMAN       | 0.04623985 | 0.09894868 |
| sp P78371 TCPB_HUMAN      | 0.04645252 | 0.50452983 |
| sp Q9C0C2 TB182_HUMAN     | 0.04800415 | 0.7498006  |
| sp Q92629-3 SGCD_HUMAN    | 0.0490036  | 0.30372584 |
| sp Q9UGT4 SUSD2_HUMAN     | 0.04925537 | 0.23541966 |
| sp P0DOX8 IGL1_HUMAN      | 0.04946518 | 0          |
| sp Q9NZ32 ARP10_HUMAN     | 0.04979897 | 0.45033538 |
| sp P35579 MYH9_HUMAN      | 0.05010605 | 1.2301164  |
| sp P12109 CO6A1_HUMAN     | 0.05039024 | 0.24452867 |
| sp Q5K4L6 S27A3_HUMAN     | 0.05084992 | 0.04707252 |
| sp O60610-2 DIAP1_HUMAN   | 0.05100727 | 0.1342476  |
| sp Q9UHL4 DPP2_HUMAN      | 0.05164337 | 1.1344727  |
| sp P0DOX3 IGD_HUMAN       | 0.05201721 | 0.656254   |
| sp O94811 TPPP_HUMAN      | 0.05537605 | 0          |
| sp Q9NYL9 TMOD3_HUMAN     | 0.05576897 | 0.5111962  |
| sp P01861 IGHG4_HUMAN     | 0.05597687 | 0.3201336  |
| sp Q9NQG5 RPR1B_HUMAN     | 0.05735016 | 0          |
| sp Q13751 LAMB3_HUMAN     | 0.05862618 | 0.35795313 |
| sp A0A0C4DH38 HV551_HUMAN | 0.06027603 | 0.19149946 |
| sp P55268 LAMB2_HUMAN     | 0.0610714  | 1.157721   |
| sp Q14651 PLSI_HUMAN      | 0.06328678 | 0          |
| sp Q9BWD1 THIC_HUMAN      | 0.06396294 | 0.19149946 |
| sp Q9NVD7 PARVA_HUMAN     | 0.06618118 | 0.7827403  |
| sp Q14894 CRYM_HUMAN      | 0.0694027  | 0.7827403  |
| sp Q08378 GOGA3_HUMAN     | 0.07129097 | 0.91601294 |
| sp Q8WX93-5 PALLD_HUMAN   | 0.07131958 | 0.5204253  |
| sp P67936 TPM4_HUMAN      | 0.07154083 | 0.94599336 |
| sp Q14847 LASP1_HUMAN     | 0.07272339 | 0.23973103 |
| sp P13647 K2C5_HUMAN      | 0.07345009 | 0.94928885 |
| sp P50148 GNAQ_HUMAN      | 0.07382393 | 0.1342476  |

|                         |            |            |
|-------------------------|------------|------------|
| sp P00568 KAD1_HUMAN    | 0.07630539 | 1.2987719  |
| sp P07195 LDHB_HUMAN    | 0.0769062  | 0.91601294 |
| sp Q15063-2 POSTN_HUMAN | 0.07770157 | 0.656254   |
| sp P23142-4 FBLN1_HUMAN | 0.07791042 | 0          |
| sp Q14118 DAG1_HUMAN    | 0.07813835 | 0.7061832  |
| sp Q93009-3 UBP7_HUMAN  | 0.07818604 | 0          |
| sp Q10589-2 BST2_HUMAN  | 0.0784626  | 0.35795313 |
| sp P56537 IF6_HUMAN     | 0.08096504 | 0.44572112 |
| sp P20339-2 RAB5A_HUMAN | 0.08111858 | 0          |
| sp P10643 CO7_HUMAN     | 0.08203125 | 0.06210651 |
| sp Q9Y5K5-2 UCHL5_HUMAN | 0.0822773  | 0.09894868 |
| sp P23946 CMA1_HUMAN    | 0.08283615 | 0.84879977 |
| sp Q66K74-2 MAP1S_HUMAN | 0.08321667 | 0          |
| sp Q9BZF9-2 UACA_HUMAN  | 0.0839529  | 0.19149946 |
| sp Q9GZT8 NIF3L_HUMAN   | 0.08515739 | 0.45033538 |
| sp Q92599-3 SEPT8_HUMAN | 0.0861454  | 0.19149946 |
| sp Q15942 ZYX_HUMAN     | 0.08640862 | 0.95332193 |
| sp P09012 SNRPA_HUMAN   | 0.08688736 | 0          |
| sp P78417-3 GSTO1_HUMAN | 0.08784676 | 0          |
| sp Q00577 PURA_HUMAN    | 0.08823776 | 0.33495146 |
| sp Q06033-2 ITIH3_HUMAN | 0.08884239 | 0.19149946 |
| sp P04004 VTNC_HUMAN    | 0.08952713 | 0.7498006  |
| sp P0DOX7 IGK_HUMAN     | 0.09157562 | 0.30372584 |
| sp O60256-3 KPRB_HUMAN  | 0.0942955  | 0.45033538 |
| sp P12111-4 CO6A3_HUMAN | 0.09584618 | 0.656254   |
| BirA-TRIP6_BirAT6       | 0.10104275 | 0.19149946 |
| sp P02747 C1QC_HUMAN    | 0.10310364 | 1.1932944  |
| sp O15061 SYNEM_HUMAN   | 0.10358143 | 0.33495146 |
| sp Q96PD5-2 PGRP2_HUMAN | 0.10424805 | 0.5111962  |
| sp Q96P70 IPO9_HUMAN    | 0.10457993 | 0.21439649 |
| sp O43301 HS12A_HUMAN   | 0.1061573  | 0.6298893  |
| sp Q6NZI2 CAVN1_HUMAN   | 0.10638619 | 0.8654178  |
| sp Q86VS8 HOOK3_HUMAN   | 0.10852432 | 0.19149946 |
| sp P35579-2 MYH9_HUMAN  | 0.10903454 | 0.656254   |
| sp Q7Z7G0 TARSH_HUMAN   | 0.10959625 | 0          |
| sp P01743 HV146_HUMAN   | 0.10971069 | 0.656254   |
| sp P60891 PRPS1_HUMAN   | 0.1108284  | 0          |
| sp P63267 ACTH_HUMAN    | 0.11135864 | 0.656254   |
| sp Q96D15 RCN3_HUMAN    | 0.11221886 | 0.35795313 |
| sp Q92905 CSN5_HUMAN    | 0.11315441 | 0.7827403  |
| sp P04196 HRG_HUMAN     | 0.11454582 | 0.81595695 |
| sp Q9BXN1 ASPN_HUMAN    | 0.11816406 | 1.3006523  |
| sp P21589-2 5NTD_HUMAN  | 0.12126923 | 0.19149946 |
| sp P07996 TSP1_HUMAN    | 0.12399292 | 0.09894868 |
| sp P13671 CO6_HUMAN     | 0.12417603 | 0.09894868 |

|                         |            |            |
|-------------------------|------------|------------|
| sp Q9H008 LHPP_HUMAN    | 0.12436867 | 0.39873424 |
| sp P62829 RL23_HUMAN    | 0.12603188 | 0          |
| sp P55058 PLTP_HUMAN    | 0.12862301 | 1.1932944  |
| sp Q9NYL4 FKB11_HUMAN   | 0.12922859 | 0          |
| sp Q27J81-2 INF2_HUMAN  | 0.1299839  | 1.1505735  |
| sp Q9NY15 STAB1_HUMAN   | 0.13059616 | 0          |
| sp P22061-2 PIMT_HUMAN  | 0.13645935 | 0.8983557  |
| sp Q96HY6 DDRKG_HUMAN   | 0.14018154 | 0.656254   |
| sp Q15102 PA1B3_HUMAN   | 0.14105797 | 0.7061832  |
| sp O00233-2 PSMD9_HUMAN | 0.1420803  | 0.19149946 |
| sp P0DOY3 IGLC3_HUMAN   | 0.14329529 | 0.6298893  |
| sp P0C0S5 H2AZ_HUMAN    | 0.14498901 | 0.656254   |
| sp Q16647 PTGIS_HUMAN   | 0.1483326  | 0.70235044 |
| sp Q9Y315 DEOC_HUMAN    | 0.15008163 | 0.1342476  |
| sp O76074-2 PDE5A_HUMAN | 0.15588188 | 0.91601294 |
| sp Q05315 LEG10_HUMAN   | 0.15616798 | 0          |
| sp P16403 H12_HUMAN     | 0.16007233 | 0          |
| sp P63027 VAMP2_HUMAN   | 0.16201973 | 1.1932944  |
| sp Q15286 RAB35_HUMAN   | 0.16278172 | 0.656254   |
| sp P62269 RS18_HUMAN    | 0.16395378 | 0.21439649 |
| sp P06132 DCUP_HUMAN    | 0.16711426 | 0.6298893  |
| sp Q30154 DRB5_HUMAN    | 0.16824341 | 0          |
| sp Q9GZP4-2 PITH1_HUMAN | 0.16915894 | 0.7827403  |
| sp P00740 FA9_HUMAN     | 0.16967773 | 0.312067   |
| sp Q9UNH7-2 SNX6_HUMAN  | 0.17202187 | 0.19149946 |
| sp P12814-2 ACTN1_HUMAN | 0.17351723 | 1.1932944  |
| sp O95810 CAVN2_HUMAN   | 0.17352104 | 1.2392054  |
| sp Q15149-9 PLEC_HUMAN  | 0.17720222 | 0.656254   |
| sp P23142 FBLN1_HUMAN   | 0.18018341 | 0.39873424 |
| sp Q5TZA2 CROCC_HUMAN   | 0.18378448 | 1.0485198  |
| sp Q16775-2 GLO2_HUMAN  | 0.1855011  | 0.91601294 |
| sp P09493-5 TPM1_HUMAN  | 0.18725967 | 1.1932944  |
| sp P00748 FA12_HUMAN    | 0.19519806 | 0.7061832  |
| sp P02461 CO3A1_HUMAN   | 0.19569016 | 0.7827403  |
| sp Q04695 K1C17_HUMAN   | 0.19782448 | 0.656254   |
| sp P34896-2 GLYC_HUMAN  | 0.19935036 | 0          |
| sp P18084 ITB5_HUMAN    | 0.20252228 | 1.1932944  |
| sp Q99733-2 NP1L4_HUMAN | 0.20755005 | 0.7498006  |
| sp P06753-6 TPM3_HUMAN  | 0.20763779 | 0.656254   |
| sp Q15404 RSU1_HUMAN    | 0.21027946 | 0.656254   |
| sp Q96HC4 PDLI5_HUMAN   | 0.21030617 | 0.656254   |
| sp Q9Y4G6 TLN2_HUMAN    | 0.21848106 | 0.656254   |
| sp P16144-2 ITB4_HUMAN  | 0.21891594 | 1.1932944  |
| sp Q687X5 STEA4_HUMAN   | 0.21991348 | 0.19149946 |
| sp P47895 AL1A3_HUMAN   | 0.22136593 | 0.656254   |

|                          |            |            |
|--------------------------|------------|------------|
| sp Q9Y281 COF2_HUMAN     | 0.22808647 | 1.1505735  |
| sp P14207 FOLR2_HUMAN    | 0.23295403 | 0.656254   |
| sp Q14515-2 SPRL1_HUMAN  | 0.23765755 | 0          |
| sp P05452 TETN_HUMAN     | 0.24341965 | 0.91601294 |
| sp P20810-4 ICAL_HUMAN   | 0.24577713 | 0.91601294 |
| sp Q15323 K1H1_HUMAN     | 0.2505741  | 0.656254   |
| sp P42285 MTREX_HUMAN    | 0.25122833 | 0.7827403  |
| sp P0DOX2 IGA2_HUMAN     | 0.2531147  | 1.1505735  |
| sp P15088 CBPA3_HUMAN    | 0.2545681  | 1.0485198  |
| sp P01911 2B1F_HUMAN     | 0.25611305 | 1.1932944  |
| sp P11171-7 41_HUMAN     | 0.25737    | 0.8983557  |
| sp O75746-2 CMC1_HUMAN   | 0.25826645 | 0.2178309  |
| sp P07951-3 TPM2_HUMAN   | 0.2615013  | 0.7588735  |
| sp A0A0C4DH25 KVD20_HUMA | 0.26438904 | 0.656254   |
| sp P36542 ATPG_HUMAN     | 0.26590538 | 0.656254   |
| sp P0COL4 CO4A_HUMAN     | 0.27246475 | 1.1932944  |
| sp P84243 H33_HUMAN      | 0.2766781  | 0          |
| sp A0A0C4DH29 HV103_HUMA | 0.2800274  | 0.656254   |
| sp Q9H6S3 ES8L2_HUMAN    | 0.29068756 | 0.7827403  |
| sp Q8TAQ2-2 SMRC2_HUMAN  | 0.2915039  | 1.0301651  |
| sp O94979-10 SC31A_HUMAN | 0.2937975  | 0.7061832  |
| sp P48741 HSP77_HUMAN    | 0.30083084 | 0.656254   |
| sp P02765 FETUA_HUMAN    | 0.3017311  | 1.0076748  |
| sp P31321 KAP1_HUMAN     | 0.3094635  | 0.656254   |
| sp Q13976-2 KGP1_HUMAN   | 0.31010056 | 0.656254   |
| sp P01834 IGKC_HUMAN     | 0.31629562 | 1.1932944  |
| sp O94919 ENDD1_HUMAN    | 0.31834412 | 0.19149946 |
| sp P35542 SAA4_HUMAN     | 0.32185364 | 1.1932944  |
| sp P30046 DOPD_HUMAN     | 0.32326698 | 1.1932944  |
| sp Q8TCD5 NT5C_HUMAN     | 0.3387184  | 1.1932944  |
| sp P30711 GSTT1_HUMAN    | 0.34223175 | 0.7061832  |
| sp P02753 RET4_HUMAN     | 0.34241295 | 0.5204253  |
| sp Q9GZM7-3 TINAL_HUMAN  | 0.34241867 | 1.1932944  |
| sp P52758 RIDA_HUMAN     | 0.361372   | 1.1932944  |
| sp Q9NSK0-5 KLC4_HUMAN   | 0.37992477 | 0.656254   |
| sp P16104 H2AX_HUMAN     | 0.43000126 | 0          |
| sp Q9Y5Z4 HEBP2_HUMAN    | 0.45191765 | 1.2773042  |
| sp Q15437 SC23B_HUMAN    | 0.49086094 | 0.656254   |
| sp P08185 CBG_HUMAN      | 0.5303974  | 1.1932944  |
| sp P69892 HBG2_HUMAN     | 0.5413246  | 0.656254   |
| sp Q05682 CALD1_HUMAN    | 0.55947685 | 0.5204253  |
| sp O76011 KRT34_HUMAN    | 0.5604229  | 0.656254   |
| sp O94788-3 AL1A2_HUMAN  | 0.5710945  | 0.656254   |
| sp P28161 GSTM2_HUMAN    | 0.57998276 | 0.656254   |
| sp A0A0C4DH41 HV461_HUMA | 0.5948429  | 0.656254   |

|                          |            |            |
|--------------------------|------------|------------|
| sp P08779 K1C16_HUMAN    | 0.6133766  | 1.1932944  |
| sp P0C0L5 CO4B_HUMAN     | 0.6143017  | 1.1932944  |
| sp P05155-2 IC1_HUMAN    | 0.66033936 | 1.1932944  |
| sp P30613-2 KPYR_HUMAN   | 0.6740303  | 0.656254   |
| sp P02533 K1C14_HUMAN    | 0.7000294  | 1.1932944  |
| sp Q9BTE3-2 MCMBP_HUMAN  | 0.79364014 | 0.19149946 |
| sp Q03591 FHR1_HUMAN     | 0.8157749  | 1.1932944  |
| sp A0A075B6P5 KV228_HUMA | 0.8710098  | 0.656254   |
| sp P23083 HV102_HUMAN    | 1.1148872  | 0.656254   |
| sp P11166 GTR1_HUMAN     | 1.2738323  | 1.1932944  |
| sp P00738 HPT_HUMAN      | 1.6296806  | 0.656254   |
| sp P20039 2B1B_HUMAN     | 1.7304668  | 0.656254   |
