# Supplementary material for: Peptidylarginine deiminase 2 citrullinates MZB1 and promotes the secretion of IgM and IgA
Source: PubMed Central journal article supplement (PMC10716219; doi:10.3389/fimmu.2023.1290585), 2023-11-29
Supplement: DataSheet_12.pdf [file DataSheet_12.pdf]

## Supplemental Table 12: COPD3 vs controls

| Accession #             | Fold Change | p value (-log10) |
|-------------------------|-------------|------------------|
| sp Q15109-10 RAGE_HUMAN | -1.4141979  | 2.1818786        |
| sp O96009 NAPSA_HUMAN   | -1.106142   | 2.6576471        |
| sp P22748 CAH4_HUMAN    | -1.0754547  | 2.6576471        |
| sp Q13510-2 ASAH1_HUMAN | -1.0377159  | 6.3204336        |
| sp P07339 CATD_HUMAN    | -0.9732132  | 8.061325         |
| sp P31949 S10AB_HUMAN   | -0.9386196  | 2.6576471        |
| sp P99999 CYC_HUMAN     | -0.9363937  | 2.1818786        |
| sp P49407-2 ARRB1_HUMAN | -0.9130364  | 2.6576471        |
| sp Q10589-2 BST2_HUMAN  | -0.9047298  | 1.6960104        |
| sp Q9NZA1-2 CLIC5_HUMAN | -0.9016819  | 3.342776         |
| sp Q01469 FABP5_HUMAN   | -0.8719826  | 4.051346         |
| sp P05141 ADT2_HUMAN    | -0.8659573  | 2.6576471        |
| sp P05362 ICAM1_HUMAN   | -0.8574009  | 4.247887         |
| sp P12429 ANXA3_HUMAN   | -0.8515568  | 7.5567927        |
| sp O43760-2 SNG2_HUMAN  | -0.8480167  | 1.6960104        |
| sp P51659 DHB4_HUMAN    | -0.8306885  | 12.110734        |
| sp P26440 IVD_HUMAN     | -0.8076057  | 1.6960104        |
| sp Q86VB7-2 C163A_HUMAN | -0.8066177  | 8.558914         |
| sp P21397 AOFA_HUMAN    | -0.7923279  | 4.628043         |
| sp O95810 CAVN2_HUMAN   | -0.7669582  | 3.8337784        |
| sp P13686 PPA5_HUMAN    | -0.7614098  | 1.6960104        |
| sp P50895 BCAM_HUMAN    | -0.7367744  | 5.0779786        |
| sp P35241 RADI_HUMAN    | -0.7350178  | 3.5908275        |
| sp P10253 LYAG_HUMAN    | -0.7302055  | 3.1266599        |
| sp O00159-3 MYO1C_HUMAN | -0.7290688  | 6.7638435        |
| sp P51149 RAB7A_HUMAN   | -0.7286568  | 3.4366283        |
| sp P62805 H4_HUMAN      | -0.71978    | 6.253077         |
| sp P08729 K2C7_HUMAN    | -0.7193699  | 14.374806        |
| sp P48735-2 IDHP_HUMAN  | -0.7140312  | 4.051346         |
| sp Q15599-2 NHRF2_HUMAN | -0.7123432  | 2.6576471        |
| sp P05091 ALDH2_HUMAN   | -0.70541    | 8.769468         |
| sp P55290-4 CAD13_HUMAN | -0.7041817  | 1.9647322        |
| sp Q8WWI1-5 LMO7_HUMAN  | -0.6997643  | 2.0265307        |
| sp P84103-2 SRSF3_HUMAN | -0.6891975  | 2.5644996        |
| sp Q6PIU2-2 NCEH1_HUMAN | -0.6850281  | 1.7165122        |
| sp Q16698-2 DECR_HUMAN  | -0.6815624  | 4.509013         |
| sp P05026-2 AT1B1_HUMAN | -0.6812954  | 2.6576471        |
| sp P07686 HEXB_HUMAN    | -0.6776495  | 1.827201         |
| sp P04179-4 SODM_HUMAN  | -0.6766319  | 3.1266599        |
| sp P31947 1433S_HUMAN   | -0.6718979  | 2.1818786        |
| sp Q9UPQ0 LIMC1_HUMAN   | -0.6666889  | 2.2323174        |
| sp P09758 TACD2_HUMAN   | -0.6619911  | 1.7590232        |
| sp Q96TA1-2 NIBL1_HUMAN | -0.6577568  | 2.653196         |

|                         |            |            |
|-------------------------|------------|------------|
| sp P56199 ITA1_HUMAN    | -0.6498127 | 6.3204336  |
| sp Q9Y624 JAM1_HUMAN    | -0.6452408 | 2.6576471  |
| sp P01903 DRA_HUMAN     | -0.6436195 | 2.1818786  |
| sp P84090 ERH_HUMAN     | -0.6419334 | 2.1818786  |
| sp P01833 PIGR_HUMAN    | -0.6410427 | 4.964395   |
| sp P43304 GPDM_HUMAN    | -0.635685  | 3.4656596  |
| sp P05023 AT1A1_HUMAN   | -0.628767  | 8.032379   |
| sp P33121-3 ACSL1_HUMAN | -0.6273994 | 2.1818786  |
| sp P00167-2 CYB5_HUMAN  | -0.6261482 | 1.5646582  |
| sp Q13740-2 CD166_HUMAN | -0.6227875 | 4.746823   |
| sp P09467 F16P1_HUMAN   | -0.6219273 | 3.9403465  |
| sp P09668 CATH_HUMAN    | -0.6212788 | 3.218121   |
| sp Q00325-2 MPCP_HUMAN  | -0.618     | 3.1266599  |
| sp Q00765 REEP5_HUMAN   | -0.6165772 | 3.1266599  |
| sp P05556 ITB1_HUMAN    | -0.6160488 | 10.140124  |
| sp Q99715-4 COCA1_HUMAN | -0.6122818 | 1.6960104  |
| sp O15143 ARC1B_HUMAN   | -0.610508  | 2.702259   |
| sp P51648-2 AL3A2_HUMAN | -0.6080132 | 2.3979244  |
| sp Q6NZI2 CAVN1_HUMAN   | -0.6068497 | 4.3492994  |
| sp Q9ULV4-3 COR1C_HUMAN | -0.605093  | 2.7624686  |
| sp P40121 CAPG_HUMAN    | -0.5990295 | 4.42992    |
| sp P07858 CATB_HUMAN    | -0.5956535 | 2.6182911  |
| sp P26038 MOES_HUMAN    | -0.5891743 | 14.4105215 |
| sp O43707 ACTN4_HUMAN   | -0.5766239 | 14.808462  |
| sp P13073 COX41_HUMAN   | -0.5723743 | 1.6960104  |
| sp O00743-3 PPP6_HUMAN  | -0.57164   | 1.6960104  |
| sp P02786 TFR1_HUMAN    | -0.5712967 | 3.218121   |
| sp Q02218-2 ODO1_HUMAN  | -0.5710468 | 3.8337784  |
| sp P09960 LKHA4_HUMAN   | -0.5640221 | 9.441114   |
| sp Q07157 ZO1_HUMAN     | -0.5634232 | 4.964395   |
| sp P07988 PSPB_HUMAN    | -0.5596371 | 1.6832623  |
| sp Q03135 CAV1_HUMAN    | -0.5526619 | 2.1818786  |
| sp Q9UHG3 PCYOX_HUMAN   | -0.5487995 | 3.7091193  |
| sp P29401-2 TKT_HUMAN   | -0.5477924 | 11.596198  |
| sp P23381 SYWC_HUMAN    | -0.5452175 | 5.0895834  |
| sp P22307-8 NLTP_HUMAN  | -0.5438938 | 1.4104178  |
| sp Q9NZN4 EHD2_HUMAN    | -0.5437985 | 6.3876214  |
| sp Q96TC7 RMD3_HUMAN    | -0.5403976 | 1.6960104  |
| sp P40926 MDHM_HUMAN    | -0.5403309 | 8.112776   |
| sp P31040 SDHA_HUMAN    | -0.5402603 | 3.261748   |
| sp P07099 HYEP_HUMAN    | -0.5341473 | 7.128238   |
| sp P00505 AATM_HUMAN    | -0.5304089 | 4.1861625  |
| sp P09622 DLDH_HUMAN    | -0.5302544 | 3.8058946  |
| sp P43034 LIS1_HUMAN    | -0.5299797 | 3.1266599  |
| sp Q8N335 GPD1L_HUMAN   | -0.5298767 | 1.6960104  |

|                         |            |           |
|-------------------------|------------|-----------|
| sp P13796 PLSL_HUMAN    | -0.5291939 | 10.720789 |
| sp Q9UBQ0-2 VPS29_HUMAN | -0.5287685 | 1.6960104 |
| sp P51649-2 SSDH_HUMAN  | -0.5269394 | 2.1818786 |
| sp Q08722-2 CD47_HUMAN  | -0.5264111 | 1.6960104 |
| sp O95994 AGR2_HUMAN    | -0.5262947 | 2.6576471 |
| sp O75390 CISY_HUMAN    | -0.5259533 | 4.146542  |
| sp P13804 ETF_A_HUMAN   | -0.5241909 | 4.509013  |
| sp Q9NNW7 TRXR2_HUMAN   | -0.524086  | 2.1818786 |
| sp P25774 CATS_HUMAN    | -0.5237942 | 1.6960104 |
| sp P63092-3 GNAS2_HUMAN | -0.5222893 | 2.9310203 |
| sp Q7L1Q6-2 BZW1_HUMAN  | -0.5186758 | 1.6960104 |
| sp P17844-2 DDX5_HUMAN  | -0.5146923 | 3.9417877 |
| sp O75874 IDHC_HUMAN    | -0.5132313 | 3.734273  |
| sp Q9H0U4 RAB1B_HUMAN   | -0.510788  | 1.6960104 |
| sp P40429 RL13A_HUMAN   | -0.5087051 | 1.6960104 |
| sp P04080 CYTB_HUMAN    | -0.5070572 | 1.6960104 |
| sp P13797 PLST_HUMAN    | -0.5062466 | 4.156673  |
| sp P62906 RL10A_HUMAN   | -0.4941425 | 1.827201  |
| sp Q8NBX0 SCPD_L_HUMAN  | -0.4940586 | 1.6960104 |
| sp P11310-2 ACADM_HUMAN | -0.4881535 | 4.051346  |
| sp Q6NUK1-2 SCMC1_HUMAN | -0.4871655 | 1.8444856 |
| sp Q02252-2 MMSA_HUMAN  | -0.4828453 | 3.1208909 |
| sp Q9HC35-2 EMAL4_HUMAN | -0.4827747 | 1.8444856 |
| sp P22897 MRC1_HUMAN    | -0.482605  | 3.8108692 |
| sp Q02543 RL18A_HUMAN   | -0.4825554 | 2.6997027 |
| sp Q04917 1433F_HUMAN   | -0.4804077 | 5.417897  |
| sp P22626 ROA2_HUMAN    | -0.4785652 | 6.423805  |
| sp P61158 ARP3_HUMAN    | -0.4745693 | 8.221851  |
| sp P17655 CAN2_HUMAN    | -0.4729996 | 5.6984367 |
| sp O95340-2 PAPS2_HUMAN | -0.4703827 | 1.6604291 |
| sp P23141-2 EST1_HUMAN  | -0.4698525 | 8.810719  |
| sp P61247 RS3A_HUMAN    | -0.468914  | 4.051346  |
| sp P37802 TAGL2_HUMAN   | -0.466404  | 5.633054  |
| sp O60814 H2B1K_HUMAN   | -0.4645672 | 1.4104178 |
| sp Q16836-3 HCDH_HUMAN  | -0.4640579 | 1.6960104 |
| sp P50225 ST1A1_HUMAN   | -0.4632721 | 1.6960104 |
| sp Q9P0L0-2 VAPA_HUMAN  | -0.4624081 | 2.8384566 |
| sp P35237 SPB6_HUMAN    | -0.462347  | 5.2139587 |
| sp P10515 ODP2_HUMAN    | -0.4587879 | 2.56956   |
| sp Q14118 DAG1_HUMAN    | -0.458374  | 1.4104178 |
| sp O94760 DDAH1_HUMAN   | -0.4569397 | 1.9647322 |
| sp P43490 NAMPT_HUMAN   | -0.456913  | 5.0779786 |
| sp P10768 ESTD_HUMAN    | -0.4554844 | 2.6576471 |
| sp Q8NF37 PCAT1_HUMAN   | -0.4546433 | 1.6997428 |
| sp P12821-2 ACE_HUMAN   | -0.4530335 | 1.6997428 |

|                         |            |            |
|-------------------------|------------|------------|
| sp O75695 XRP2_HUMAN    | -0.4510288 | 1.4104178  |
| sp P14543-2 NID1_HUMAN  | -0.4490452 | 3.4751866  |
| sp P21796 VDAC1_HUMAN   | -0.4466591 | 3.2217336  |
| sp P49591 SYSC_HUMAN    | -0.4417076 | 3.760603   |
| sp Q969X5-2 ERGI1_HUMAN | -0.4409332 | 1.4104178  |
| sp P14866-2 HNRPL_HUMAN | -0.438591  | 1.6960104  |
| sp P62873 GBB1_HUMAN    | -0.4384556 | 3.4656596  |
| sp P61106 RAB14_HUMAN   | -0.4373875 | 3.4366283  |
| sp P60903 S10AA_HUMAN   | -0.4373283 | 1.6960104  |
| sp P09525 ANXA4_HUMAN   | -0.4346237 | 5.118518   |
| sp O60437 PEPL_HUMAN    | -0.4342728 | 11.381452  |
| sp O43837 IDH3B_HUMAN   | -0.4324913 | 1.6960104  |
| sp P62263 RS14_HUMAN    | -0.430748  | 1.4104178  |
| sp P21964-2 COMT_HUMAN  | -0.4303017 | 1.3957126  |
| sp Q9UHB6-4 LIMA1_HUMAN | -0.429596  | 2.1818786  |
| sp Q92597 NDRG1_HUMAN   | -0.4286346 | 1.5646582  |
| sp P62917 RL8_HUMAN     | -0.427124  | 2.6576471  |
| sp Q07955-3 SRSF1_HUMAN | -0.4267998 | 3.0819354  |
| sp P07237 PDIA1_HUMAN   | -0.4267731 | 12.9745865 |
| sp P36957 ODO2_HUMAN    | -0.4228401 | 2.923088   |
| sp Q9Y6N5 SQOR_HUMAN    | -0.4215565 | 2.1242583  |
| sp O43813 LANC1_HUMAN   | -0.4199143 | 1.6960104  |
| sp P23246 SFPQ_HUMAN    | -0.4194698 | 4.7039127  |
| sp Q00839 HNRPU_HUMAN   | -0.4187527 | 2.4140475  |
| sp P38646 GRP75_HUMAN   | -0.4168167 | 5.6107674  |
| sp P11413-2 G6PD_HUMAN  | -0.4144898 | 2.400925   |
| sp Q13451 FKBP5_HUMAN   | -0.4144287 | 1.4936475  |
| sp P00352 AL1A1_HUMAN   | -0.4138145 | 8.810719   |
| sp P10301 RRAS_HUMAN    | -0.4134769 | 1.6960104  |
| sp Q15907-2 RB11B_HUMAN | -0.4114265 | 2.8739974  |
| sp P53597 SUCA_HUMAN    | -0.4098396 | 1.6960104  |
| sp Q07020-2 RL18_HUMAN  | -0.4096298 | 1.6960104  |
| sp Q13011 ECH1_HUMAN    | -0.4082127 | 2.1377194  |
| sp P49756 RBM25_HUMAN   | -0.4060268 | 1.6960104  |
| sp O60271-4 JIP4_HUMAN  | -0.4059143 | 1.6960104  |
| sp P60981 DEST_HUMAN    | -0.4057045 | 2.6576471  |
| sp Q16543 CDC37_HUMAN   | -0.4051285 | 4.12427    |
| sp P61421 VA0D1_HUMAN   | -0.4046326 | 1.8595492  |
| sp Q96KP4 CNDP2_HUMAN   | -0.4029961 | 7.086946   |
| sp P38606 VATA_HUMAN    | -0.4022875 | 1.8842831  |
| sp P12081-4 SYHC_HUMAN  | -0.400734  | 1.4104178  |
| sp P62937 PPIA_HUMAN    | -0.4000149 | 1.6960104  |
| sp P42330 AK1C3_HUMAN   | -0.3999128 | 2.653196   |
| sp P19338 NUCL_HUMAN    | -0.3998947 | 7.9589314  |
| sp P42765 THIM_HUMAN    | -0.3996773 | 3.3179681  |

|                          |            |           |
|--------------------------|------------|-----------|
| sp P35268 RL22_HUMAN     | -0.3996048 | 1.6960104 |
| sp P08758 ANXA5_HUMAN    | -0.3984489 | 7.916384  |
| sp P11021 BIP_HUMAN      | -0.3973351 | 12.99033  |
| sp Q9NTX5-6 ECHD1_HUMAN  | -0.3956871 | 1.3080103 |
| sp P06733 ENOA_HUMAN     | -0.3951111 | 8.338646  |
| sp Q16853 AOC3_HUMAN     | -0.3948669 | 3.5553887 |
| sp Q9P2R7-2 SUCB1_HUMAN  | -0.3948479 | 3.1266599 |
| sp P13639 EF2_HUMAN      | -0.3923264 | 9.340597  |
| sp P18206-2 VINC_HUMAN   | -0.3919258 | 15.65356  |
| sp P51572-2 BAP31_HUMAN  | -0.389595  | 3.5908275 |
| sp P08575-10 PTPRC_HUMAN | -0.389101  | 2.838374  |
| sp P35222 CTNB1_HUMAN    | -0.3890019 | 2.1931286 |
| sp P11766 ADHX_HUMAN     | -0.3872643 | 3.354223  |
| sp P61604 CH10_HUMAN     | -0.3866272 | 2.5644996 |
| sp P62826 RAN_HUMAN      | -0.3832283 | 1.827201  |
| sp Q9ULA0 DNPEP_HUMAN    | -0.3827381 | 4.964395  |
| sp P09211 GSTP1_HUMAN    | -0.3822975 | 3.292093  |
| sp P30040 ERP29_HUMAN    | -0.3822556 | 2.3047035 |
| sp P26641 EF1G_HUMAN     | -0.3763523 | 4.372737  |
| sp O75083 WDR1_HUMAN     | -0.3751755 | 8.889428  |
| sp Q15366-2 PCBP2_HUMAN  | -0.3750629 | 1.6960104 |
| sp Q9UMS4 PRP19_HUMAN    | -0.3746586 | 2.3047035 |
| sp P53007 TXTP_HUMAN     | -0.3735085 | 2.6576471 |
| sp P10155 RO60_HUMAN     | -0.3705559 | 2.0727112 |
| sp P55268 LAMB2_HUMAN    | -0.3691664 | 5.8614116 |
| sp P35221 CTNA1_HUMAN    | -0.3691502 | 5.605573  |
| sp P27797 CALR_HUMAN     | -0.3689289 | 4.9577103 |
| sp Q9H4M9 EHD1_HUMAN     | -0.3685474 | 2.838374  |
| sp P15311 EZRI_HUMAN     | -0.3638468 | 3.2214048 |
| sp P24752 THIL_HUMAN     | -0.3610058 | 2.9455793 |
| sp P11047 LAMC1_HUMAN    | -0.3607483 | 5.765215  |
| sp Q13217 DNJC3_HUMAN    | -0.3601685 | 2.1818786 |
| sp P60174 TPIS_HUMAN     | -0.3586569 | 6.8254647 |
| sp P23634-8 AT2B4_HUMAN  | -0.3582382 | 2.3388627 |
| sp Q9H8H3 MET7A_HUMAN    | -0.3579292 | 1.4104178 |
| sp P62993 GRB2_HUMAN     | -0.3576641 | 2.3047035 |
| sp P61981 1433G_HUMAN    | -0.355402  | 1.8992519 |
| sp P50995-2 ANX11_HUMAN  | -0.3550072 | 2.8438601 |
| sp Q9UFN0 NPS3A_HUMAN    | -0.3546867 | 1.6960104 |
| sp P11177-3 ODPB_HUMAN   | -0.3546486 | 1.5983955 |
| sp Q13228-4 SBP1_HUMAN   | -0.3530216 | 9.64541   |
| sp Q13425 SNTB2_HUMAN    | -0.3525219 | 1.7590232 |
| sp P40939 ECHA_HUMAN     | -0.3514633 | 6.1994724 |
| sp P62249 RS16_HUMAN     | -0.3507271 | 1.6960104 |
| sp Q96CW1-2 AP2M1_HUMAN  | -0.3501797 | 2.1818786 |

|                         |            |           |
|-------------------------|------------|-----------|
| sp O15144 ARPC2_HUMAN   | -0.3501473 | 1.6092666 |
| sp P49189 AL9A1_HUMAN   | -0.3483887 | 6.096973  |
| sp P16284-3 PECA1_HUMAN | -0.3472538 | 2.3798928 |
| sp P08648 ITA5_HUMAN    | -0.3466339 | 1.6960104 |
| sp P29590 PML_HUMAN     | -0.3449974 | 3.2608445 |
| sp Q02878 RL6_HUMAN     | -0.3436966 | 1.6960104 |
| sp P62258 1433E_HUMAN   | -0.3435192 | 2.1818786 |
| sp P61978-3 HNRPK_HUMAN | -0.3430767 | 5.2234774 |
| sp P07355-2 ANXA2_HUMAN | -0.3416996 | 2.2270947 |
| sp P22695 QCR2_HUMAN    | -0.3407555 | 2.3143692 |
| sp P38919 IF4A3_HUMAN   | -0.3405895 | 1.8595492 |
| sp P35914 HMGCL_HUMAN   | -0.3403778 | 2.6576471 |
| sp P49327 FAS_HUMAN     | -0.3397808 | 5.7321286 |
| sp Q16762 THTR_HUMAN    | -0.3387032 | 1.3815327 |
| sp P17931 LEG3_HUMAN    | -0.3384609 | 2.6576471 |
| sp P60660-2 MYL6_HUMAN  | -0.3376617 | 3.760603  |
| sp Q9HCC0 MCCB_HUMAN    | -0.3355637 | 1.6092666 |
| sp Q6YHK3 CD109_HUMAN   | -0.3353119 | 3.0019732 |
| sp P11940-2 PABP1_HUMAN | -0.3347759 | 1.6960104 |
| sp P00367 DHE3_HUMAN    | -0.3335419 | 2.1952481 |
| sp P01011 AACT_HUMAN    | -0.3299103 | 8.143158  |
| sp Q9BUJ2-4 HNRL1_HUMAN | -0.32967   | 2.173994  |
| sp P02743 SAMP_HUMAN    | -0.3293667 | 1.7451575 |
| sp Q16555 DPYL2_HUMAN   | -0.3275585 | 6.5985336 |
| sp Q02978-2 M2OM_HUMAN  | -0.3275356 | 1.4104178 |
| sp Q96AG4 LRC59_HUMAN   | -0.3246555 | 2.6576471 |
| sp Q92945 FUBP2_HUMAN   | -0.3238716 | 3.07285   |
| sp P40306 PSB10_HUMAN   | -0.3236408 | 2.1818786 |
| sp Q16363-2 LAMA4_HUMAN | -0.3216476 | 3.3700237 |
| sp P55084 ECHB_HUMAN    | -0.3216076 | 3.1629772 |
| sp P52272-2 HNRPM_HUMAN | -0.3206635 | 4.2269735 |
| sp P20700 LMNB1_HUMAN   | -0.3193169 | 10.507279 |
| sp P59998 ARPC4_HUMAN   | -0.3179474 | 1.9951487 |
| sp P46940 IQGA1_HUMAN   | -0.3151856 | 9.950464  |
| sp P60900 PSA6_HUMAN    | -0.3144016 | 3.7723744 |
| sp Q86UP2-4 KTN1_HUMAN  | -0.314394  | 5.6827826 |
| sp P19367-2 HXK1_HUMAN  | -0.3137093 | 2.6576467 |
| sp P63000-2 RAC1_HUMAN  | -0.313591  | 1.4104178 |
| sp Q96I99 SUCB2_HUMAN   | -0.3120613 | 2.845279  |
| sp P63010-2 AP2B1_HUMAN | -0.3107643 | 1.5054473 |
| sp Q1KMD3 HNRL2_HUMAN   | -0.3107433 | 3.316053  |
| sp P37837 TALDO_HUMAN   | -0.3098564 | 6.096973  |
| sp Q9BR76 COR1B_HUMAN   | -0.3092041 | 1.9509854 |
| sp P62140 PP1B_HUMAN    | -0.3084049 | 1.4104178 |
| sp Q16658 FSCN1_HUMAN   | -0.3067951 | 2.3626237 |

|                          |            |           |
|--------------------------|------------|-----------|
| sp Q9HBL0 TENS1_HUMAN    | -0.3053742 | 3.8255916 |
| sp P27348 1433T_HUMAN    | -0.3048725 | 2.1952481 |
| sp P07900-2 HS90A_HUMAN  | -0.3048668 | 5.2257013 |
| sp P0DP25 CALM3_HUMAN    | -0.3040733 | 3.5908275 |
| sp Q6WCCQ1-2 MPRIP_HUMAN | -0.3037033 | 2.2731557 |
| sp Q02318 CP27A_HUMAN    | -0.3027687 | 1.4104178 |
| sp P51148-2 RAB5C_HUMAN  | -0.3025932 | 1.6960104 |
| sp P55072 TERA_HUMAN     | -0.3006897 | 9.246625  |
| sp P21980 TGM2_HUMAN     | -0.2996407 | 9.255672  |
| sp P23284 PPIB_HUMAN     | -0.299572  | 3.0819354 |
| sp P63104 1433Z_HUMAN    | -0.299572  | 3.671968  |
| sp P14314-2 GLU2B_HUMAN  | -0.2986012 | 2.5461748 |
| sp Q9Y2B0 CNPY2_HUMAN    | -0.2985296 | 1.6960104 |
| sp P15121 ALDR_HUMAN     | -0.2983913 | 2.2613342 |
| sp P07737 PROF1_HUMAN    | -0.291647  | 4.28322   |
| sp Q16527 CSRP2_HUMAN    | -0.2914505 | 1.6960104 |
| sp Q01082 SPTB2_HUMAN    | -0.2910233 | 14.95459  |
| sp P49748-2 ACADV_HUMAN  | -0.2908745 | 5.4615245 |
| sp P08559-2 ODPA_HUMAN   | -0.2900124 | 2.4723146 |
| sp Q13045-2 FLII_HUMAN   | -0.2889042 | 1.560883  |
| sp P36578 RL4_HUMAN      | -0.2887592 | 2.2385595 |
| sp P17612 KAPCA_HUMAN    | -0.2874966 | 1.3815327 |
| sp Q13347 EIF3I_HUMAN    | -0.2862663 | 2.151766  |
| sp P10809 CH60_HUMAN     | -0.2852936 | 4.6351686 |
| sp Q9NQC3 RTN4_HUMAN     | -0.2852421 | 1.7590232 |
| sp P16615 AT2A2_HUMAN    | -0.2850876 | 4.9138513 |
| sp Q14103-3 HNRPD_HUMAN  | -0.2838879 | 2.0102134 |
| sp O14950 ML12B_HUMAN    | -0.2833481 | 1.7590232 |
| sp P68104 EF1A1_HUMAN    | -0.2833443 | 1.9509854 |
| sp Q9UBQ7 GRHPR_HUMAN    | -0.2830772 | 1.5646582 |
| sp P11142 HSP7C_HUMAN    | -0.2825947 | 4.518582  |
| sp P43121 MUC18_HUMAN    | -0.2824955 | 2.2323174 |
| sp P21291 CSRP1_HUMAN    | -0.2796478 | 4.7229815 |
| sp P30740 ILEU_HUMAN     | -0.2786083 | 1.4351699 |
| sp P51991 ROA3_HUMAN     | -0.2773218 | 1.3815327 |
| sp P08133 ANXA6_HUMAN    | -0.276989  | 10.601593 |
| sp Q9HDC9 APMAP_HUMAN    | -0.2757702 | 2.824564  |
| sp Q15084-2 PDIA6_HUMAN  | -0.2737837 | 3.8108692 |
| sp Q12905 ILF2_HUMAN     | -0.2722836 | 3.3283036 |
| sp P16152 CBR1_HUMAN     | -0.2716675 | 1.7451575 |
| sp P07942 LAMB1_HUMAN    | -0.2715702 | 3.6223958 |
| sp O00231-2 PSD11_HUMAN  | -0.2704697 | 1.3815327 |
| sp Q9NSE4 SYIM_HUMAN     | -0.270052  | 2.7472508 |
| sp P25398 RS12_HUMAN     | -0.2692919 | 2.6576471 |
| sp P52565 GDIR1_HUMAN    | -0.2687683 | 3.342776  |

|                         |            |           |
|-------------------------|------------|-----------|
| sp O00299 CLIC1_HUMAN   | -0.2684479 | 1.9787219 |
| sp Q9NQR4 NIT2_HUMAN    | -0.2671032 | 1.9190748 |
| sp Q7Z406 MYH14_HUMAN   | -0.26684   | 4.737692  |
| sp Q9NZM1-6 MYOF_HUMAN  | -0.2668304 | 2.735238  |
| sp Q14974 IMB1_HUMAN    | -0.266592  | 2.6947098 |
| sp P60953 CDC42_HUMAN   | -0.2651005 | 1.4050349 |
| sp O75348 VATG1_HUMAN   | -0.2637367 | 1.4104178 |
| sp Q13308-6 PTK7_HUMAN  | -0.2636814 | 2.1818786 |
| sp O14773 TPP1_HUMAN    | -0.2635727 | 1.7590232 |
| sp P23396 RS3_HUMAN     | -0.2635441 | 3.0873964 |
| sp Q16531 DDB1_HUMAN    | -0.2634182 | 2.651758  |
| sp P14625 ENPL_HUMAN    | -0.2629242 | 11.436339 |
| sp P05107 ITB2_HUMAN    | -0.2628555 | 2.2613342 |
| sp Q8NBJ5 GT251_HUMAN   | -0.2625942 | 1.6960104 |
| sp P07203 GPX1_HUMAN    | -0.2624493 | 1.9049921 |
| sp P35232 PHB_HUMAN     | -0.2611847 | 2.312627  |
| sp P25786-2 PSA1_HUMAN  | -0.260376  | 4.1295223 |
| sp Q06830 PRDX1_HUMAN   | -0.2603664 | 4.7229815 |
| sp Q01130-2 SRSF2_HUMAN | -0.2584381 | 1.6960104 |
| sp P06737-2 PYGL_HUMAN  | -0.2583065 | 2.7989542 |
| sp O75369-2 FLNB_HUMAN  | -0.2570648 | 8.935387  |
| sp Q9BXS5-2 AP1M1_HUMAN | -0.2568378 | 1.3815327 |
| sp Q14764 MVP_HUMAN     | -0.2567692 | 4.293713  |
| sp P28482 MK01_HUMAN    | -0.256609  | 1.9951487 |
| sp P21281 VATB2_HUMAN   | -0.2566013 | 3.5190198 |
| sp P48444 COPD_HUMAN    | -0.2564526 | 4.612768  |
| sp P0DMV9 HS71B_HUMAN   | -0.2563839 | 4.09663   |
| sp P31150 GDIA_HUMAN    | -0.2563267 | 2.4314263 |
| sp Q9BVC6 TM109_HUMAN   | -0.2543831 | 1.4104178 |
| sp P18124 RL7_HUMAN     | -0.254158  | 1.4278674 |
| sp P00390-2 GSHR_HUMAN  | -0.2532482 | 1.8444856 |
| sp P08865 RSSA_HUMAN    | -0.2513065 | 2.544769  |
| sp P07954-2 FUMH_HUMAN  | -0.2505398 | 1.6997428 |
| sp Q14240-2 IF4A2_HUMAN | -0.2503185 | 1.5646582 |
| sp P04075 ALDOA_HUMAN   | -0.2502461 | 5.2976747 |
| sp O14936-2 CSKP_HUMAN  | -0.2495079 | 1.9951487 |
| sp Q99536 VAT1_HUMAN    | -0.2488709 | 2.5929193 |
| sp P61626 LYSC_HUMAN    | -0.2485333 | 2.4829872 |
| sp P13489 RINI_HUMAN    | -0.2456799 | 3.0297134 |
| sp Q9Y277-2 VDAC3_HUMAN | -0.2446022 | 2.3388627 |
| sp P20340-2 RAB6A_HUMAN | -0.2439404 | 2.838374  |
| sp P30101 PDIA3_HUMAN   | -0.2424202 | 6.3254604 |
| sp P29218 IMPA1_HUMAN   | -0.2416573 | 2.1404836 |
| sp Q08211 DHX9_HUMAN    | -0.2407131 | 3.2024403 |
| sp P60228 EIF3E_HUMAN   | -0.2400837 | 1.4716977 |



|                          |            |           |
|--------------------------|------------|-----------|
| sp Q96AE4-2 FUBP1_HUMAN  | -0.2388191 | 1.4564189 |
| sp O75643 U520_HUMAN     | -0.2387848 | 1.6960104 |
| sp P98160 PGBM_HUMAN     | -0.2387104 | 5.653564  |
| sp P05783 K1C18_HUMAN    | -0.2384682 | 4.1315417 |
| sp P26447 S10A4_HUMAN    | -0.2373047 | 2.6576471 |
| sp P60842 IF4A1_HUMAN    | -0.2370186 | 2.6182911 |
| sp Q8IU7 AEBP1_HUMAN     | -0.2368107 | 1.4050349 |
| sp Q15233 NONO_HUMAN     | -0.236002  | 1.8087089 |
| sp Q8WUM4 PDC6I_HUMAN    | -0.2357693 | 2.2612653 |
| sp Q96QK1 VPS35_HUMAN    | -0.2357578 | 1.4017582 |
| sp P00558 PGK1_HUMAN     | -0.2354889 | 1.444889  |
| sp P61204 ARF3_HUMAN     | -0.235096  | 1.560883  |
| sp Q9NPH2 INO1_HUMAN     | -0.2335796 | 2.058973  |
| sp P28838-2 AMPL_HUMAN   | -0.231741  | 5.311325  |
| sp P62987 RL40_HUMAN     | -0.2306156 | 2.151766  |
| sp P06744 G6PI_HUMAN     | -0.230381  | 4.4293685 |
| sp Q9Y678 COPG1_HUMAN    | -0.2283783 | 3.707581  |
| sp P49411 EFTU_HUMAN     | -0.2274551 | 2.9455793 |
| sp P08311 CATG_HUMAN     | -0.2263641 | 1.4278674 |
| sp P52209-2 6PGD_HUMAN   | -0.2253418 | 4.0155067 |
| sp O43390-2 HNRPR_HUMAN  | -0.2236786 | 3.1092827 |
| sp P46777 RL5_HUMAN      | -0.2236042 | 2.747965  |
| sp Q15393 SF3B3_HUMAN    | -0.2233963 | 1.9413493 |
| sp P55263 ADK_HUMAN      | -0.2228527 | 1.3815327 |
| sp P02750 A2GL_HUMAN     | -0.2224617 | 1.7165122 |
| sp P46782 RS5_HUMAN      | -0.2214947 | 2.3559585 |
| sp P63244 RACK1_HUMAN    | -0.2214375 | 2.1697264 |
| sp Q16891-2 MIC60_HUMAN  | -0.2203121 | 2.2613342 |
| sp Q9H223 EHD4_HUMAN     | -0.2200756 | 1.4936475 |
| sp P02788 TRFL_HUMAN     | -0.2193317 | 13.131768 |
| sp P09497-2 CLCB_HUMAN   | -0.2186775 | 2.1818786 |
| sp P08727 K1C19_HUMAN    | -0.2186298 | 5.389566  |
| sp Q07954 LRP1_HUMAN     | -0.2178497 | 3.468374  |
| sp P24539 AT5F1_HUMAN    | -0.2171001 | 2.1404836 |
| sp Q14011-2 CIRBP_HUMAN  | -0.2152529 | 1.6960104 |
| sp P35606 COPB2_HUMAN    | -0.2141247 | 3.2401628 |
| sp P53621-2 COPA_HUMAN   | -0.209959  | 2.2338576 |
| sp Q9P258 RCC2_HUMAN     | -0.2059956 | 1.7590232 |
| sp O75436 VP26A_HUMAN    | -0.2052612 | 2.151766  |
| sp Q13557-12 KCC2D_HUMAN | -0.2042837 | 1.827201  |
| sp P13861 KAP2_HUMAN     | -0.2042236 | 2.7220116 |
| sp P20618 PSB1_HUMAN     | -0.2042122 | 3.2221727 |
| sp Q9Y3I0 RTCB_HUMAN     | -0.2035656 | 2.2385595 |
| sp P49419-2 AL7A1_HUMAN  | -0.2023106 | 2.0615394 |
| sp P39060-1 COIA1_HUMAN  | -0.202282  | 1.9951487 |

|                         |            |           |
|-------------------------|------------|-----------|
| sp Q99798 ACON_HUMAN    | -0.202282  | 3.2840328 |
| sp P49588-2 SYAC_HUMAN  | -0.2021675 | 2.2047858 |
| sp P12956 XRCC6_HUMAN   | -0.2009392 | 3.201616  |
| sp Q92841-3 DDX17_HUMAN | -0.2006531 | 1.5424668 |
| sp P09382 LEG1_HUMAN    | -0.1997013 | 2.747965  |
| sp P47756-2 CAPZB_HUMAN | -0.1994686 | 3.2347682 |
| sp P02545 LMNA_HUMAN    | -0.1988258 | 11.858376 |
| sp P16278-2 BGAL_HUMAN  | -0.1985512 | 1.560883  |
| sp O00764-2 PDXK_HUMAN  | -0.1982422 | 1.6092666 |
| sp P04632 CPNS1_HUMAN   | -0.1963244 | 1.3481187 |
| sp Q9H4A4 AMPB_HUMAN    | -0.1963158 | 1.7306389 |
| sp Q12906-4 ILF3_HUMAN  | -0.1959648 | 4.40577   |
| sp P05198 IF2A_HUMAN    | -0.1952934 | 1.9647322 |
| sp P50453 SPB9_HUMAN    | -0.1931496 | 1.5567774 |
| sp P30153 2AAA_HUMAN    | -0.1922112 | 2.0615394 |
| sp Q9Y4L1 HYOU1_HUMAN   | -0.192193  | 1.3379446 |
| sp P14868 SYDC_HUMAN    | -0.191143  | 3.500665  |
| sp P47755 CAZA2_HUMAN   | -0.1908054 | 2.1092448 |
| sp P31146 COR1A_HUMAN   | -0.1900578 | 1.7921138 |
| sp Q15746-2 MYLK_HUMAN  | -0.1884232 | 2.2323174 |
| sp P11216 PYGB_HUMAN    | -0.1872692 | 1.8557531 |
| sp P46939-2 UTRO_HUMAN  | -0.1861668 | 3.3179681 |
| sp Q9UBG0 MRC2_HUMAN    | -0.1857491 | 1.7265131 |
| sp P23526 SAHH_HUMAN    | -0.183321  | 2.301498  |
| sp P06576 ATPB_HUMAN    | -0.1830349 | 3.0979662 |
| sp Q16851 UGPA_HUMAN    | -0.1814098 | 1.5942118 |
| sp Q99623 PHB2_HUMAN    | -0.1809311 | 2.0751042 |
| sp Q15293 RCN1_HUMAN    | -0.1804199 | 1.560883  |
| sp P49368 TCPG_HUMAN    | -0.1790886 | 2.9122765 |
| sp Q9Y490 TLN1_HUMAN    | -0.1779137 | 10.308417 |
| sp P05164-3 PERM_HUMAN  | -0.1773911 | 2.3173661 |
| sp O75131 CPNE3_HUMAN   | -0.1760063 | 1.3668759 |
| sp P13010 XRCC5_HUMAN   | -0.1752396 | 1.6267194 |
| sp Q13263 TIF1B_HUMAN   | -0.175024  | 1.3665526 |
| sp P18669 PGAM1_HUMAN   | -0.1717377 | 1.3226568 |
| sp Q9UL46 PSME2_HUMAN   | -0.1714401 | 1.560883  |
| sp Q6DD88 ATLA3_HUMAN   | -0.1699066 | 1.3080103 |
| sp Q7Z4W1 DCXR_HUMAN    | -0.1687336 | 1.7590232 |
| sp Q00610-2 CLH1_HUMAN  | -0.1684742 | 2.9116788 |
| sp P32969 RL9_HUMAN     | -0.1677589 | 1.6960104 |
| sp P27338 AOFB_HUMAN    | -0.1676903 | 2.173994  |
| sp P20674 COX5A_HUMAN   | -0.1673298 | 1.6960104 |
| sp P13667 PDIA4_HUMAN   | -0.166502  | 4.6288357 |
| sp P08238 HS90B_HUMAN   | -0.1657314 | 1.4126712 |
| sp Q9BSJ8-2 ESYT1_HUMAN | -0.1651135 | 2.3145256 |

|                         |            |           |
|-------------------------|------------|-----------|
| sp P35580-3 MYH10_HUMAN | -0.1637421 | 7.2392063 |
| sp Q15124 PGM5_HUMAN    | -0.1631737 | 2.0178351 |
| sp O95831-3 AIFM1_HUMAN | -0.1623688 | 2.7597136 |
| sp O15230 LAMA5_HUMAN   | -0.1616535 | 1.5194324 |
| sp P00325 ADH1B_HUMAN   | -0.1613007 | 1.9951487 |
| sp Q03252 LMNB2_HUMAN   | -0.1612873 | 3.879411  |
| sp P07384 CAN1_HUMAN    | -0.157589  | 1.4567577 |
| sp O60749 SNX2_HUMAN    | -0.1571293 | 2.312627  |
| sp P61081 UBC12_HUMAN   | -0.1556816 | 2.3143692 |
| sp P52566 GDIR2_HUMAN   | -0.1542931 | 1.5054473 |
| sp P04843 RPN1_HUMAN    | -0.1499748 | 1.8976122 |
| sp P06756-3 ITAV_HUMAN  | -0.1466827 | 1.4605758 |
| sp P12110 CO6A2_HUMAN   | -0.1428623 | 2.1923351 |
| sp P01009 A1AT_HUMAN    | -0.1416569 | 4.9720736 |
| sp P62241 RS8_HUMAN     | -0.125906  | 1.9413493 |
| sp P62316-2 SMD2_HUMAN  | -0.1218548 | 1.6960104 |
| sp Q15029-2 U5S1_HUMAN  | -0.1191912 | 1.4068714 |
| sp P48637 GSHB_HUMAN    | -0.1142464 | 2.0598862 |
| sp O15173-2 PGRC2_HUMAN | -0.0932884 | 1.3815327 |
| sp Q9P2E9 RRBP1_HUMAN   | -0.0552254 | 1.6955315 |
| sp P17174 AATC_HUMAN    | 0.04894829 | 1.4068714 |
| sp P78371 TCPB_HUMAN    | 0.06207848 | 1.3607222 |
| sp P17661 DESM_HUMAN    | 0.09907341 | 4.1731977 |
| sp Q9UHL4 DPP2_HUMAN    | 0.10057259 | 1.4351699 |
| sp Q12805-2 FBLN3_HUMAN | 0.11464691 | 1.800942  |
| sp P08670 VIME_HUMAN    | 0.11870575 | 9.746241  |
| sp Q9UNZ2-5 NSF1C_HUMAN | 0.11901474 | 1.6832623 |
| sp P13611 CSPG2_HUMAN   | 0.12263107 | 1.3668759 |
| sp P04275 VWF_HUMAN     | 0.12509918 | 2.407128  |
| sp P13798 ACPH_HUMAN    | 0.1253128  | 1.7565529 |
| sp P28331-2 NDUS1_HUMAN | 0.13256836 | 1.4278674 |
| sp P35555 FBN1_HUMAN    | 0.13557243 | 1.9765971 |
| sp P00568 KAD1_HUMAN    | 0.1444416  | 1.6046445 |
| sp P00450 CERU_HUMAN    | 0.14829063 | 4.670891  |
| sp P27105 STOM_HUMAN    | 0.1547718  | 3.2925725 |
| sp Q15661 TRYB1_HUMAN   | 0.15645218 | 3.0019732 |
| sp Q14315-2 FLNC_HUMAN  | 0.15871811 | 5.9378057 |
| sp P67936-2 TPM4_HUMAN  | 0.17012978 | 1.6960104 |
| sp P00751 CFAB_HUMAN    | 0.17462921 | 6.9483953 |
| sp P10643 CO7_HUMAN     | 0.18388367 | 1.3213577 |
| sp Q8N2S1 LTBP4_HUMAN   | 0.18825531 | 3.0253785 |
| sp Q16647 PTGIS_HUMAN   | 0.1989193  | 1.4278674 |
| sp P02790 HEMO_HUMAN    | 0.22452164 | 5.854947  |
| sp P04217 A1BG_HUMAN    | 0.2343216  | 1.4126712 |
| sp Q00341-2 VIGLN_HUMAN | 0.23452187 | 1.4751658 |

|                         |            |           |
|-------------------------|------------|-----------|
| sp Q9UBX5 FBLN5_HUMAN   | 0.23580742 | 2.0598862 |
| sp Q8NBS9 TXND5_HUMAN   | 0.239151   | 5.0895834 |
| sp P01861 IGHG4_HUMAN   | 0.24751854 | 1.8595492 |
| sp P25311 ZA2G_HUMAN    | 0.24859619 | 2.4829872 |
| sp P07357 CO8A_HUMAN    | 0.25520897 | 1.8444856 |
| sp P35611-2 ADDA_HUMAN  | 0.25980377 | 2.3143692 |
| sp P02768 ALBU_HUMAN    | 0.2719326  | 3.3363256 |
| sp O60610-2 DIAP1_HUMAN | 0.2740612  | 1.5646582 |
| sp P98095-2 FBLN2_HUMAN | 0.27562714 | 2.9793715 |
| sp P01031 CO5_HUMAN     | 0.2762909  | 3.7727528 |
| sp P30041 PRDX6_HUMAN   | 0.27753067 | 3.5097537 |
| sp P36955 PEDF_HUMAN    | 0.28664207 | 3.0251918 |
| sp P22105-1 TENX_HUMAN  | 0.2888813  | 9.856805  |
| sp O00754-2 MA2B1_HUMAN | 0.29742432 | 2.1818786 |
| sp P00748 FA12_HUMAN    | 0.30023003 | 1.4104178 |
| sp Q07507 DERM_HUMAN    | 0.30643463 | 3.103845  |
| sp P22392-2 NDKB_HUMAN  | 0.30796432 | 2.6576471 |
| sp P02765 FETUA_HUMAN   | 0.3093729  | 1.6997428 |
| sp P02649 APOE_HUMAN    | 0.31316948 | 1.8507931 |
| sp Q9UMS6-2 SYNP2_HUMAN | 0.31889725 | 2.6576471 |
| sp Q99598 TSNAX_HUMAN   | 0.34841347 | 1.6960104 |
| sp O14558 HSPB6_HUMAN   | 0.36224556 | 1.560883  |
| sp Q05707 COEA1_HUMAN   | 0.36885834 | 9.764618  |
| sp P03952 KLKB1_HUMAN   | 0.36933136 | 2.1818786 |
| sp P01859 IGHG2_HUMAN   | 0.3821125  | 3.671968  |
| sp P39059 COFA1_HUMAN   | 0.38402176 | 2.1818786 |
| sp P02766 TTHY_HUMAN    | 0.38710403 | 2.1818786 |
| sp P49913 CAMP_HUMAN    | 0.40273285 | 1.6960104 |
| sp P19827 ITIH1_HUMAN   | 0.40452194 | 2.4970746 |
| sp P05156 CFAI_HUMAN    | 0.40534973 | 4.051346  |
| sp P01023 A2MG_HUMAN    | 0.40900993 | 15.25562  |
| sp P04003 C4BPA_HUMAN   | 0.41529465 | 4.5635147 |
| sp P06702 S10A9_HUMAN   | 0.41584396 | 2.1404836 |
| sp P07451 CAH3_HUMAN    | 0.4210472  | 1.8838416 |
| sp P02760 AMBIP_HUMAN   | 0.4212799  | 2.441399  |
| sp P05452 TETN_HUMAN    | 0.4220066  | 1.6960104 |
| sp P23946 CMA1_HUMAN    | 0.42876434 | 2.4829872 |
| sp Q9Y315 DEOC_HUMAN    | 0.43627357 | 1.9647322 |
| sp O43301 HS12A_HUMAN   | 0.4588337  | 2.1818786 |
| sp P00734 THRB_HUMAN    | 0.45954704 | 6.423805  |
| sp P20810-4 ICAL_HUMAN  | 0.47285652 | 1.6960104 |
| sp P13671 CO6_HUMAN     | 0.47297668 | 1.6960104 |
| sp Q8WU39 MZB1_HUMAN    | 0.48945236 | 2.3047035 |
| sp P0DOX5 IGG1_HUMAN    | 0.49958038 | 3.887875  |
| sp P08603 CFAH_HUMAN    | 0.50346756 | 15.35253  |

|                         |            |           |
|-------------------------|------------|-----------|
| sp P07996 TSP1_HUMAN    | 0.5042496  | 1.6960104 |
| sp P04040 CATA_HUMAN    | 0.5069752  | 10.827353 |
| sp P19823 ITIH2_HUMAN   | 0.51641655 | 5.417897  |
| sp P04196 HRG_HUMAN     | 0.53082085 | 3.887875  |
| sp P09493-9 TPM1_HUMAN  | 0.53315735 | 1.6960104 |
| sp P02774-3 VTDB_HUMAN  | 0.5451584  | 8.958427  |
| sp P10909-5 CLUS_HUMAN  | 0.5483742  | 4.964395  |
| sp P29622 KAIN_HUMAN    | 0.5596771  | 2.6576471 |
| sp P43652 AFAM_HUMAN    | 0.5628624  | 4.509013  |
| sp P00492 HPRT_HUMAN    | 0.5665741  | 2.1818786 |
| sp Q9BXN1 ASPN_HUMAN    | 0.5900192  | 2.6576471 |
| sp P00491 PNPH_HUMAN    | 0.59103775 | 4.220149  |
| sp P0DOX8 IGL1_HUMAN    | 0.59856415 | 2.1818786 |
| sp P01876 IGHA1_HUMAN   | 0.6050339  | 4.509013  |
| sp P01008 ANT3_HUMAN    | 0.60894775 | 8.010044  |
| sp P36269-3 GGT5_HUMAN  | 0.61184216 | 3.1266599 |
| sp P11678 PERE_HUMAN    | 0.61528397 | 1.4104178 |
| sp P00747 PLMN_HUMAN    | 0.63069725 | 6.645139  |
| sp Q96D15 RCN3_HUMAN    | 0.6349659  | 1.6960104 |
| sp P04259 K2C6B_HUMAN   | 0.645277   | 2.1818786 |
| sp P01871-2 IGHM_HUMAN  | 0.69179153 | 2.1818786 |
| sp P51888 PRELP_HUMAN   | 0.694191   | 5.869831  |
| sp P13647 K2C5_HUMAN    | 0.69883347 | 6.7698927 |
| sp P35527 K1C9_HUMAN    | 0.70916176 | 5.5742316 |
| sp P13716-2 HEM2_HUMAN  | 0.720726   | 3.5908275 |
| sp P02749 APOH_HUMAN    | 0.72964096 | 2.817951  |
| sp P04114 APOB_HUMAN    | 0.73796463 | 12.475591 |
| sp Q15102 PA1B3_HUMAN   | 0.7380066  | 1.6960104 |
| sp P13645 K1C10_HUMAN   | 0.7405472  | 10.200565 |
| sp P06727 APOA4_HUMAN   | 0.7486286  | 6.3204336 |
| sp P35908 K22E_HUMAN    | 0.75609016 | 7.665951  |
| sp P01042-2 KNG1_HUMAN  | 0.7568741  | 7.2183566 |
| sp P0DOY3 IGLC3_HUMAN   | 0.8024597  | 2.1818786 |
| sp P11171-7 41_HUMAN    | 0.83636093 | 2.1818786 |
| sp Q9NYL4 FKB11_HUMAN   | 0.87648296 | 1.4104178 |
| sp P04264 K2C1_HUMAN    | 0.881197   | 12.996504 |
| sp P23456 Trypsin       | 0.90629387 | 3.5908275 |
| sp P08123 CO1A2_HUMAN   | 0.9159508  | 2.6576471 |
| sp P02679-2 FIBG_HUMAN  | 0.9273262  | 7.185697  |
| sp Q5TDH0-3 DDI2_HUMAN  | 0.9294262  | 1.6960104 |
| sp P02675 FIBB_HUMAN    | 0.9405899  | 10.337908 |
| sp P02452 CO1A1_HUMAN   | 0.9537945  | 2.1800864 |
| sp P11277-2 SPTB1_HUMAN | 0.97397995 | 6.3204336 |
| sp P01860 IGHG3_HUMAN   | 0.9992695  | 2.6576471 |
| sp P15088 CBPA3_HUMAN   | 1.0240707  | 2.1818786 |

|                         |            |           |
|-------------------------|------------|-----------|
| sp P05546 HEP2_HUMAN    | 1.0361633  | 2.6576471 |
| sp P27169 PON1_HUMAN    | 1.0718412  | 1.6960104 |
| sp P02671 FIBA_HUMAN    | 1.0924168  | 11.667864 |
| sp P30043 BLVRB_HUMAN   | 1.1237984  | 2.1818786 |
| sp P16157-21 ANK1_HUMAN | 1.1487083  | 4.051346  |
| sp P07738 PMGE_HUMAN    | 1.2384453  | 2.1818786 |
| sp P02549-2 SPTA1_HUMAN | 1.243742   | 9.893875  |
| sp P51884 LUM_HUMAN     | 1.2929459  | 8.112776  |
| sp P02652-2 APOA2_HUMAN | 1.3467789  | 3.1266599 |
| sp P02730 B3AT_HUMAN    | 1.4804726  | 6.7698927 |
| sp P02647 APOA1_HUMAN   | 1.5010452  | 13.420564 |
| sp P07585 PGS2_HUMAN    | 1.6383743  | 5.417897  |
| sp P00918 CAH2_HUMAN    | 1.6874275  | 4.509013  |
| sp P20774 MIME_HUMAN    | 1.7522964  | 4.051346  |
| sp P00915 CAH1_HUMAN    | 1.8656311  | 7.665951  |
| sp P32119 PRDX2_HUMAN   | 2.0975037  | 6.7698927 |
| sp P02042 HBD_HUMAN     | 2.2778378  | 4.051346  |
| sp P68871 HBB_HUMAN     | 2.6614857  | 4.051346  |
| sp P69905 HBA_HUMAN     | 2.8671894  | 4.051346  |
| sp P08263 GSTA1_HUMAN   | -1.9158535 | 0.656254  |
| sp Q9BW04 SARG_HUMAN    | -1.510603  | 1.1932944 |
| sp O00757 F16P2_HUMAN   | -1.4904575 | 1.1932944 |
| sp P04229 2B11_HUMAN    | -1.1787872 | 0.656254  |
| sp P08473 NEP_HUMAN     | -1.1199198 | 0.5204253 |
| sp P30044-2 PRDX5_HUMAN | -1.0732689 | 0.656254  |
| sp Q9Y4G6 TLN2_HUMAN    | -0.9276104 | 0.656254  |
| sp Q03113 GNA12_HUMAN   | -0.9246178 | 0.656254  |
| sp Q9UBR2 CATZ_HUMAN    | -0.8874226 | 1.1932944 |
| sp P51153 RAB13_HUMAN   | -0.8838997 | 0.656254  |
| sp P28799-3 GRN_HUMAN   | -0.8749914 | 0.7061832 |
| sp P63218 GBG5_HUMAN    | -0.8671036 | 1.1932944 |
| sp Q8NC51-3 PAIRB_HUMAN | -0.8643608 | 1.1932944 |
| sp Q08209-5 PP2BA_HUMAN | -0.8634777 | 0         |
| sp Q96IJ6-2 GMPPA_HUMAN | -0.84762   | 1.1932944 |
| sp P12236 ADT3_HUMAN    | -0.8409882 | 1.1932944 |
| sp P28330 ACADL_HUMAN   | -0.8354359 | 1.1932944 |
| sp P38159 RBMX_HUMAN    | -0.8292866 | 0.656254  |
| sp Q15056-2 IF4H_HUMAN  | -0.8186607 | 1.1932944 |
| sp Q01518 CAP1_HUMAN    | -0.8113909 | 0.656254  |
| sp Q03135-2 CAV1_HUMAN  | -0.8040009 | 0.656254  |
| sp O00592-2 PODXL_HUMAN | -0.8033085 | 1.1932944 |
| sp P61601 NCALD_HUMAN   | -0.7826338 | 0.656254  |
| sp Q9NUB1-2 ACS2L_HUMAN | -0.7726479 | 1.1932944 |
| sp Q16777 H2A2C_HUMAN   | -0.7692757 | 1.1932944 |
| sp P51606-2 RENBP_HUMAN | -0.7625732 | 1.1932944 |

|                         |            |            |
|-------------------------|------------|------------|
| sp P33151 CADH5_HUMAN   | -0.7618408 | 1.1932944  |
| sp Q29963 1C06_HUMAN    | -0.7586403 | 0.656254   |
| sp Q6DN03 H2B2C_HUMAN   | -0.7406597 | 1.1932944  |
| sp Q86TX2 ACOT1_HUMAN   | -0.7170544 | 0.656254   |
| sp O43795-2 MYO1B_HUMAN | -0.7159872 | 1.1932944  |
| sp Q12846 STX4_HUMAN    | -0.7033958 | 0.656254   |
| sp P15170-2 ERF3A_HUMAN | -0.6948128 | 1.1932944  |
| sp Q8NBQ5 DHB11_HUMAN   | -0.6936417 | 1.1932944  |
| sp P12830 CADH1_HUMAN   | -0.6885319 | 0.7827403  |
| sp P02462 CO4A1_HUMAN   | -0.6877041 | 0.5204253  |
| sp Q15286 RAB35_HUMAN   | -0.685894  | 0.656254   |
| sp Q9UDY2-3 ZO2_HUMAN   | -0.6794033 | 1.1932944  |
| sp P63167 DYL1_HUMAN    | -0.6769695 | 0.656254   |
| sp Q9NVJ2 ARL8B_HUMAN   | -0.6763039 | 1.1932944  |
| sp Q13813-3 SPTN1_HUMAN | -0.6742859 | 0          |
| sp Q15185-3 TEBP_HUMAN  | -0.6742306 | 1.1932944  |
| sp Q01955 CO4A3_HUMAN   | -0.6620178 | 1.1932944  |
| sp Q13976 KGP1_HUMAN    | -0.6571674 | 0.656254   |
| sp P08962-2 CD63_HUMAN  | -0.6539497 | 1.1932944  |
| sp P37235 HPCL1_HUMAN   | -0.6437607 | 0.656254   |
| sp Q96FV2-2 SCRN2_HUMAN | -0.6401863 | 1.1932944  |
| sp P62834 RAP1A_HUMAN   | -0.6399832 | 0.656254   |
| sp P20702 ITAX_HUMAN    | -0.6384506 | 0.656254   |
| sp Q9NPY3 C1QR1_HUMAN   | -0.631958  | 1.1932944  |
| sp P48509 CD151_HUMAN   | -0.6298847 | 1.1932944  |
| sp P68371 TBB4B_HUMAN   | -0.627739  | 1.1932944  |
| sp Q13283 G3BP1_HUMAN   | -0.6268005 | 1.1932944  |
| sp P16422 EPCAM_HUMAN   | -0.6067858 | 1.1932944  |
| sp O95837 GNA14_HUMAN   | -0.6005173 | 0.656254   |
| sp Q93077 H2A1C_HUMAN   | -0.598856  | 0.7827403  |
| sp P61586 RHOA_HUMAN    | -0.5983906 | 1.1932944  |
| sp Q9Y394-2 DHRS7_HUMAN | -0.587759  | 0.7588735  |
| sp Q9H2U2-3 IPYR2_HUMAN | -0.5859108 | 0.656254   |
| sp Q14956-2 GPNMB_HUMAN | -0.5780182 | 1.1932944  |
| sp P36871 PGM1_HUMAN    | -0.5719013 | 1.1932944  |
| sp A6NMY6 AXA2L_HUMAN   | -0.5674095 | 0.656254   |
| sp O00186 STXB3_HUMAN   | -0.5588388 | 1.1932944  |
| sp Q08431 MFGM_HUMAN    | -0.547205  | 0.35795313 |
| sp Q9UHN6-2 CEIP2_HUMAN | -0.5470066 | 1.1932944  |
| sp P61916-2 NPC2_HUMAN  | -0.5378094 | 1.1932944  |
| sp P04839 CY24B_HUMAN   | -0.5319605 | 1.1932944  |
| sp Q7L576 CYFP1_HUMAN   | -0.5296974 | 1.1932944  |
| sp Q07075 AMPE_HUMAN    | -0.528223  | 1.0485198  |
| sp P06396-2 GELS_HUMAN  | -0.5246544 | 0.656254   |
| sp Q32MZ4-3 LRRF1_HUMAN | -0.5228329 | 0.7827403  |

|                         |            |            |
|-------------------------|------------|------------|
| sp Q7Z4I7-3 LIMS2_HUMAN | -0.5184174 | 1.1932944  |
| sp Q13884 SNTB1_HUMAN   | -0.5163918 | 0.7827403  |
| sp P13761 2B17_HUMAN    | -0.5153675 | 0          |
| sp P61956-2 SUMO2_HUMAN | -0.5114403 | 0.656254   |
| sp P08134 RHOC_HUMAN    | -0.5084248 | 0.7827403  |
| sp O60504-2 VINEX_HUMAN | -0.5050869 | 1.1791906  |
| sp P52788-2 SPSY_HUMAN  | -0.5048943 | 1.1932944  |
| sp Q15637-2 SF01_HUMAN  | -0.5035191 | 1.1932944  |
| sp O00712-4 NFIB_HUMAN  | -0.5001755 | 0.656254   |
| sp P16930 FAAA_HUMAN    | -0.4940586 | 0.656254   |
| sp P62745 RHOB_HUMAN    | -0.4932556 | 0.656254   |
| sp O95197-2 RTN3_HUMAN  | -0.4891586 | 1.1932944  |
| sp P02741 CRP_HUMAN     | -0.4886475 | 1.1932944  |
| sp P16104 H2AX_HUMAN    | -0.4858141 | 0          |
| sp Q53GQ0 DHB12_HUMAN   | -0.4801388 | 0.35795313 |
| sp P27635 RL10_HUMAN    | -0.476347  | 0.656254   |
| sp Q9NVD7 PARVA_HUMAN   | -0.4749851 | 0          |
| sp P10619-2 PPGB_HUMAN  | -0.4711189 | 1.1932944  |
| sp Q96BM9 ARL8A_HUMAN   | -0.4705067 | 0.656254   |
| sp P0CG39 POTEJ_HUMAN   | -0.4654179 | 0.656254   |
| sp P11233 RALA_HUMAN    | -0.4633789 | 0.7588735  |
| sp Q9NPJ3 ACO13_HUMAN   | -0.4520187 | 1.1932944  |
| sp O94811 TPPP_HUMAN    | -0.450778  | 0.7827403  |
| sp Q14697 GANAB_HUMAN   | -0.4491024 | 1.1932944  |
| sp P27824-2 CALX_HUMAN  | -0.4480934 | 0.7827403  |
| sp P51991-2 ROA3_HUMAN  | -0.4477043 | 0.656254   |
| sp P42167 LAP2B_HUMAN   | -0.4474945 | 1.1932944  |
| sp Q13751 LAMB3_HUMAN   | -0.443264  | 0.7061832  |
| sp O60701-2 UGDH_HUMAN  | -0.4427643 | 0.656254   |
| sp Q9NYF8-2 BCLF1_HUMAN | -0.4392967 | 1.1932944  |
| sp P10412 H14_HUMAN     | -0.4392281 | 1.1932944  |
| sp Q7L2H7 EIF3M_HUMAN   | -0.4324799 | 0.656254   |
| sp Q9UL25 RAB21_HUMAN   | -0.4307156 | 1.3006523  |
| sp Q13813-2 SPTN1_HUMAN | -0.4277763 | 1.1932944  |
| sp P36542-2 ATPG_HUMAN  | -0.4274788 | 0.656254   |
| sp P20292 AL5AP_HUMAN   | -0.424902  | 0.5204253  |
| sp Q8NBF2-2 NHLC2_HUMAN | -0.4220696 | 0.7827403  |
| sp P09110 THIK_HUMAN    | -0.4210596 | 1.2095301  |
| sp P11234-2 RALB_HUMAN  | -0.4184609 | 0.656254   |
| sp Q8TCJ2 STT3B_HUMAN   | -0.4167156 | 0.35795313 |
| sp P16403 H12_HUMAN     | -0.4166088 | 0          |
| sp Q9UGT4 SUSD2_HUMAN   | -0.4162254 | 0.84879977 |
| sp Q15181 IPYR_HUMAN    | -0.407404  | 1.2941489  |
| sp Q9H8L6 MMRN2_HUMAN   | -0.4020309 | 1.1932944  |
| sp Q9UL18 AGO1_HUMAN    | -0.3989162 | 0.35795313 |



|                         |            |            |
|-------------------------|------------|------------|
| sp P14923 PLAK_HUMAN    | -0.3981018 | 1.2095301  |
| sp Q9GZM7-3 TINAL_HUMAN | -0.3954325 | 0.45033538 |
| sp P78406 RAE1L_HUMAN   | -0.3949471 | 1.1932944  |
| sp P08621-3 RU17_HUMAN  | -0.3932324 | 1.3006523  |
| sp Q08170 SRSF4_HUMAN   | -0.392271  | 0.656254   |
| sp P11387 TOP1_HUMAN    | -0.3898125 | 1.1932944  |
| sp P09601 HMOX1_HUMAN   | -0.3888245 | 1.0485198  |
| sp P26373 RL13_HUMAN    | -0.3871594 | 1.0485198  |
| sp P18077 RL35A_HUMAN   | -0.3798161 | 1.2095301  |
| sp A5A3E0 POTEF_HUMAN   | -0.3789768 | 0          |
| sp P30419-2 NMT1_HUMAN  | -0.3773308 | 0.656254   |
| sp Q71UM5 RS27L_HUMAN   | -0.3693848 | 1.1932944  |
| sp O75923-11 DYSF_HUMAN | -0.3688831 | 1.0301651  |
| sp Q13938-4 CAYP1_HUMAN | -0.3677959 | 0          |
| sp Q99729-3 ROAA_HUMAN  | -0.3676491 | 0.51870745 |
| sp Q8TD06 AGR3_HUMAN    | -0.3638172 | 0.7827403  |
| sp E9PAV3 NACAM_HUMAN   | -0.3620663 | 1.1932944  |
| sp Q6YN16 HSDL2_HUMAN   | -0.3606701 | 0.35795313 |
| sp Q16822 PCKGM_HUMAN   | -0.3598557 | 0.7827403  |
| sp Q9NZU5-2 LMCD1_HUMAN | -0.3593102 | 1.1932943  |
| sp P53634 CATC_HUMAN    | -0.3567467 | 0.5204253  |
| sp P31153 METK2_HUMAN   | -0.3543358 | 0.656254   |
| sp Q8TCD5 NT5C_HUMAN    | -0.3516407 | 0.45033538 |
| sp O60784-3 TOM1_HUMAN  | -0.345314  | 0.656254   |
| sp Q96HD1 CREL1_HUMAN   | -0.3451023 | 0.45033538 |
| sp P09651-3 ROA1_HUMAN  | -0.3445778 | 1.2773042  |
| sp P11717 MPRI_HUMAN    | -0.3434715 | 1.1932944  |
| sp Q5JPE7-2 NOMO2_HUMAN | -0.3434219 | 1.1505735  |
| sp Q9BWS9-3 CHID1_HUMAN | -0.3411751 | 0.656254   |
| sp P48163-2 MAOX_HUMAN  | -0.3403511 | 0.5204253  |
| sp P0DPI2-2 GAL3A_HUMAN | -0.3396473 | 0.2178309  |
| sp O95394-3 AGM1_HUMAN  | -0.3395577 | 1.1932944  |
| sp Q9BTE1 DCTN5_HUMAN   | -0.3394489 | 1.1932944  |
| sp P12694 ODBA_HUMAN    | -0.3376274 | 0.7061832  |
| sp P30049 ATPD_HUMAN    | -0.3363037 | 1.1932944  |
| sp P60709 ACTB_HUMAN    | -0.3354721 | 0.656254   |
| sp Q9UH99-3 SUN2_HUMAN  | -0.3347397 | 0.5111962  |
| sp P63261 ACTG_HUMAN    | -0.3335762 | 0.656254   |
| sp P63220 RS21_HUMAN    | -0.330843  | 1.1932944  |
| sp P62995-3 TRA2B_HUMAN | -0.329422  | 1.1932944  |
| sp Q13642-1 FHL1_HUMAN  | -0.3260574 | 0.656254   |
| sp P06703 S10A6_HUMAN   | -0.3257027 | 1.1932944  |
| sp P29972-2 AQP1_HUMAN  | -0.3255425 | 0          |
| sp Q9UQ80 PA2G4_HUMAN   | -0.3225594 | 0.656254   |
| sp P11279 LAMP1_HUMAN   | -0.3220005 | 0.7827403  |

|                           |            |            |
|---------------------------|------------|------------|
| sp A0A0B4J1X8 HV343_HUMAN | -0.3219662 | 0          |
| sp O94905 ERLN2_HUMAN     | -0.320879  | 1.1932944  |
| sp P62714 PP2AB_HUMAN     | -0.3198471 | 0.656254   |
| sp Q13838-2 DX39B_HUMAN   | -0.319561  | 0.5111962  |
| sp Q9H3N1 TMX1_HUMAN      | -0.316803  | 0.5204253  |
| sp Q92522 H1X_HUMAN       | -0.3143053 | 0.7827403  |
| sp Q9Y371-2 SHLB1_HUMAN   | -0.3132744 | 0          |
| sp Q92888-2 ARHG1_HUMAN   | -0.312789  | 0.80804527 |
| sp P02792 FRIL_HUMAN      | -0.3124561 | 1.2090194  |
| sp P02769 ALBU_BOVIN      | -0.3114777 | 0.06312432 |
| sp P07948-2 LYN_HUMAN     | -0.3111439 | 0.7827403  |
| sp P29144 TPP2_HUMAN      | -0.3106537 | 0.80804527 |
| sp P31946-2 1433B_HUMAN   | -0.3095512 | 0.656254   |
| sp Q9Y696 CLIC4_HUMAN     | -0.3094864 | 0.70235044 |
| sp Q9UBS4 DJB11_HUMAN     | -0.3064899 | 1.1932944  |
| sp Q05315 LEG10_HUMAN     | -0.3061867 | 0.45033538 |
| sp P60033 CD81_HUMAN      | -0.3059845 | 1.1932944  |
| sp P07437 TBB5_HUMAN      | -0.3059635 | 0.06291623 |
| sp P31943 HNRH1_HUMAN     | -0.304493  | 1.2607617  |
| sp P13284 GILT_HUMAN      | -0.304143  | 0.80804527 |
| sp Q9HB71 CYBP_HUMAN      | -0.3039208 | 0.6070219  |
| sp P29466-2 CASP1_HUMAN   | -0.3027306 | 0.656254   |
| sp P51858 HDGF_HUMAN      | -0.302166  | 1.2095301  |
| sp P25788-2 PSA3_HUMAN    | -0.3010216 | 1.3006523  |
| sp P06239-3 LCK_HUMAN     | -0.3006439 | 0.656254   |
| sp P06865 HEXA_HUMAN      | -0.3003883 | 0.35795313 |
| sp Q86Y82 STX12_HUMAN     | -0.2996311 | 1.0634323  |
| sp Q6DKJ4 NXN_HUMAN       | -0.2989235 | 0.19149946 |
| sp P63096 GNAI1_HUMAN     | -0.2971363 | 0.91601294 |
| sp P46781 RS9_HUMAN       | -0.2952652 | 0.758334   |
| sp Q9NX63 MIC19_HUMAN     | -0.2951069 | 1.1932944  |
| sp Q15365 PCBP1_HUMAN     | -0.2921429 | 1.1240381  |
| sp Q9BRA2 TXD17_HUMAN     | -0.2905502 | 1.2095301  |
| sp P61313 RL15_HUMAN      | -0.2888489 | 0.19149946 |
| sp Q92696 PGTA_HUMAN      | -0.2885799 | 1.1791906  |
| sp Q07812-7 BAX_HUMAN     | -0.2869225 | 0.19149946 |
| sp Q9P2J5-2 SYLC_HUMAN    | -0.2842045 | 0.7827403  |
| sp Q6ZVM7-3 TM1L2_HUMAN   | -0.2813854 | 1.1932944  |
| sp P62879 GBB2_HUMAN      | -0.2806034 | 1.2095301  |
| sp P61160 ARP2_HUMAN      | -0.2797737 | 1.1932944  |
| sp P04083 ANXA1_HUMAN     | -0.2785759 | 1.0173417  |
| sp P01892 1A02_HUMAN      | -0.2784958 | 0.2178309  |
| sp P52895 AK1C2_HUMAN     | -0.2780962 | 0.45033538 |
| sp O15067 PUR4_HUMAN      | -0.2779741 | 0.7827403  |
| sp Q13200 PSMD2_HUMAN     | -0.2779236 | 0.7061832  |

|                         |            |            |
|-------------------------|------------|------------|
| sp O94973-2 AP2A2_HUMAN | -0.2756901 | 1.2184663  |
| sp Q562R1 ACTBL_HUMAN   | -0.2748184 | 0.312067   |
| sp Q92973-2 TNPO1_HUMAN | -0.2741661 | 1.2095301  |
| sp P04066 FUCO_HUMAN    | -0.2735539 | 0.7061832  |
| sp P13693 TCTP_HUMAN    | -0.2704716 | 1.1932944  |
| sp P09417-2 DHPR_HUMAN  | -0.2698097 | 0.45033538 |
| sp P31946 1433B_HUMAN   | -0.2687035 | 0.656254   |
| sp P08754 GNAI3_HUMAN   | -0.2681332 | 0.8983557  |
| sp Q92817 EVPL_HUMAN    | -0.2671051 | 1.2773042  |
| sp P19404 NDUV2_HUMAN   | -0.2650776 | 1.1932944  |
| sp Q99436 PSB7_HUMAN    | -0.2645378 | 0.7827403  |
| sp Q13435 SF3B2_HUMAN   | -0.2643089 | 0.6070219  |
| sp P18428 LBP_HUMAN     | -0.2609329 | 0.7061832  |
| sp P55327-3 TPD52_HUMAN | -0.26087   | 1.1932944  |
| sp P00966 ASSY_HUMAN    | -0.2593384 | 1.214352   |
| sp Q9UGI8-2 TES_HUMAN   | -0.2587376 | 0.48353976 |
| sp P42226 STAT6_HUMAN   | -0.2583046 | 0.656254   |
| sp P54886-2 P5CS_HUMAN  | -0.2578373 | 0.7061832  |
| sp P49903-2 SPS1_HUMAN  | -0.2560291 | 0.7061832  |
| sp P07305-2 H10_HUMAN   | -0.2556343 | 0.43633315 |
| sp Q13247-3 SRSF6_HUMAN | -0.2548723 | 0.45033538 |
| sp Q10713 MPPA_HUMAN    | -0.2547417 | 0.70235044 |
| sp Q9BQE3 TBA1C_HUMAN   | -0.2529163 | 0.656254   |
| sp O75533 SF3B1_HUMAN   | -0.2524395 | 1.1932944  |
| sp P68366-2 TBA4A_HUMAN | -0.252348  | 0.8983557  |
| sp Q9HD45 TM9S3_HUMAN   | -0.2508011 | 0.45033538 |
| sp P46976-2 GLYG_HUMAN  | -0.250042  | 1.3006523  |
| sp Q96M27-3 PRRC1_HUMAN | -0.2491875 | 0.7827403  |
| sp Q96FN4 CPNE2_HUMAN   | -0.2491036 | 0          |
| sp P48047 ATPO_HUMAN    | -0.248497  | 0.33495146 |
| sp P49354-2 FNNTA_HUMAN | -0.2484217 | 0.8983557  |
| sp P50135 HNMT_HUMAN    | -0.2439041 | 0.45033538 |
| sp P50213 IDH3A_HUMAN   | -0.2436619 | 0.48757824 |
| sp Q9UN86-2 G3BP2_HUMAN | -0.243578  | 0          |
| sp O43852-3 CALU_HUMAN  | -0.2431221 | 0.40256184 |
| sp Q8NHP8 PLBL2_HUMAN   | -0.2429314 | 0.19149946 |
| sp Q9Y3F4-2 STRAP_HUMAN | -0.2423401 | 0.2178309  |
| sp Q9NR56-2 MBNL1_HUMAN | -0.2419548 | 1.1932944  |
| sp P36551 HEM6_HUMAN    | -0.2413521 | 0          |
| sp P41218 MNDA_HUMAN    | -0.2412376 | 0.30372584 |
| sp P08236-2 BGLR_HUMAN  | -0.2400131 | 0.6298893  |
| sp P15559-2 NQO1_HUMAN  | -0.2385063 | 0.7827403  |
| sp P61019 RAB2A_HUMAN   | -0.2368794 | 0.66088426 |
| sp P15586-2 GNS_HUMAN   | -0.2366142 | 0.35795313 |
| sp Q9Y383-3 LC7L2_HUMAN | -0.2357864 | 0.5204253  |

|                         |            |            |
|-------------------------|------------|------------|
| sp Q13418 ILK_HUMAN     | -0.2325401 | 0.96371543 |
| sp P20645 MPRD_HUMAN    | -0.2319775 | 1.0301651  |
| sp P61353 RL27_HUMAN    | -0.2314682 | 1.1932944  |
| sp Q9UNF0-2 PACN2_HUMAN | -0.2310333 | 0.84879977 |
| sp P30838 AL3A1_HUMAN   | -0.2308254 | 0.45033538 |
| sp Q96HE7 ERO1A_HUMAN   | -0.2306175 | 0.91601294 |
| sp Q9NTK5 OLA1_HUMAN    | -0.2304077 | 0.45033538 |
| sp Q8WXF1 PSPC1_HUMAN   | -0.2284222 | 0.95332193 |
| sp P10644 KAPO_HUMAN    | -0.228262  | 0.6070219  |
| sp P16435 NCPH_HUMAN    | -0.2256432 | 0.7868989  |
| sp O95716 RAB3D_HUMAN   | -0.2254114 | 0.656254   |
| sp P11217 PYGM_HUMAN    | -0.2243996 | 0.656254   |
| sp P30050 RL12_HUMAN    | -0.2227974 | 1.2095301  |
| sp Q9HB40 RISC_HUMAN    | -0.2221756 | 1.0301651  |
| sp Q9Y3A3-3 PHOEN_HUMAN | -0.221796  | 0          |
| sp P16671-4 CD36_HUMAN  | -0.2216778 | 0.8983557  |
| sp P28070 PSB4_HUMAN    | -0.2206497 | 0.7217418  |
| sp P33316 DUT_HUMAN     | -0.2202625 | 1.1932944  |
| sp P67775 PP2AA_HUMAN   | -0.2194862 | 0.656254   |
| sp Q9UBV8 PEF1_HUMAN    | -0.2191906 | 0.91601294 |
| sp Q96C86 DCPS_HUMAN    | -0.2189369 | 0.5204253  |
| sp O43684-2 BUB3_HUMAN  | -0.2186756 | 1.1932944  |
| sp Q99426 TBCB_HUMAN    | -0.2185459 | 0.91601294 |
| sp P84095 RHOG_HUMAN    | -0.2183456 | 0.5204253  |
| sp P46926 GNPI1_HUMAN   | -0.2180367 | 1.0485198  |
| sp P25705 ATPA_HUMAN    | -0.2178536 | 0.45563722 |
| sp Q9NZ08-2 ERAP1_HUMAN | -0.2168121 | 1.1932943  |
| sp Q7Z7H5-3 TMED4_HUMAN | -0.2166328 | 0.7827403  |
| sp P09429 HMGB1_HUMAN   | -0.2163048 | 0.45033538 |
| sp Q8NDH3 PEPL1_HUMAN   | -0.2158794 | 0.09750395 |
| sp P23588 IF4B_HUMAN    | -0.2155094 | 0.5692702  |
| sp Q15691 MARE1_HUMAN   | -0.2141657 | 1.0634323  |
| sp P02794 FRIH_HUMAN    | -0.2126675 | 0.48520416 |
| sp Q03519 TAP2_HUMAN    | -0.2126064 | 0.656254   |
| sp Q9BS26 ERP44_HUMAN   | -0.2110882 | 1.1791906  |
| sp O95782-2 AP2A1_HUMAN | -0.2109661 | 0.20467198 |
| sp Q14108 SCRB2_HUMAN   | -0.2106056 | 0.19149946 |
| sp P61923 COPZ1_HUMAN   | -0.2105074 | 0.19149946 |
| sp Q6IAA8 LTOR1_HUMAN   | -0.2102642 | 0.19149946 |
| sp O15260-2 SURF4_HUMAN | -0.2098341 | 0.45033538 |
| sp Q15149-3 PLEC_HUMAN  | -0.2073174 | 0.656254   |
| sp P07910-2 HNRPC_HUMAN | -0.2066193 | 0.7588735  |
| sp Q04760-2 LGUL_HUMAN  | -0.2055035 | 0.06291623 |
| sp P23368 MAOM_HUMAN    | -0.2054634 | 0.93112767 |
| sp P53396-2 ACLY_HUMAN  | -0.205101  | 1.1205355  |

|                         |            |            |
|-------------------------|------------|------------|
| sp Q92747 ARC1A_HUMAN   | -0.2043076 | 0.656254   |
| sp P50552 VASP_HUMAN    | -0.2040854 | 0.87291557 |
| sp P28676 GRAN_HUMAN    | -0.2039318 | 0.45033538 |
| sp Q14019 COTL1_HUMAN   | -0.2038822 | 1.3006523  |
| BirA-TRIP6_BirAT6       | -0.2023964 | 0.7827403  |
| sp Q9P2T1-2 GMPR2_HUMAN | -0.2018871 | 0.33495146 |
| sp P62495-2 ERF1_HUMAN  | -0.201807  | 0.35795313 |
| sp P62942 FKB1A_HUMAN   | -0.2014885 | 0.656254   |
| sp Q9HCB6 SPON1_HUMAN   | -0.2009659 | 1.120602   |
| sp Q01813-2 PFKAP_HUMAN | -0.1984959 | 1.3006523  |
| sp O00391 QSOX1_HUMAN   | -0.1980534 | 0.45033538 |
| sp P55010 IF5_HUMAN     | -0.1980438 | 0.97209185 |
| sp Q13596-2 SNX1_HUMAN  | -0.1975117 | 0          |
| sp P47985 UCRI_HUMAN    | -0.1968727 | 0.91601294 |
| sp P40123-2 CAP2_HUMAN  | -0.1958523 | 0          |
| sp Q9P2X0-2 DPM3_HUMAN  | -0.1957626 | 0.7827403  |
| sp O43491 E41L2_HUMAN   | -0.195282  | 1.2438905  |
| sp Q9UUK9 NUDT5_HUMAN   | -0.1952496 | 0.45033538 |
| sp Q9UHX1-6 PUF60_HUMAN | -0.193675  | 0.35795313 |
| sp Q96JB5-4 CK5P3_HUMAN | -0.1934624 | 0.35795313 |
| sp Q9Y5P6-2 GMPPB_HUMAN | -0.1934357 | 0.04707252 |
| sp Q96EP5-2 DAZP1_HUMAN | -0.1934109 | 0.7827403  |
| sp Q5TFE4 NT5D1_HUMAN   | -0.1927662 | 0.312067   |
| sp P49458 SRP09_HUMAN   | -0.1922703 | 1.1932944  |
| sp P31689-2 DNJA1_HUMAN | -0.1903915 | 1.1932944  |
| sp P62820 RAB1A_HUMAN   | -0.1901436 | 1.0485198  |
| sp O43776 SYNC_HUMAN    | -0.1900711 | 0.48520416 |
| sp Q32P44 EMAL3_HUMAN   | -0.1899586 | 0.80804527 |
| sp P45954-2 ACDSB_HUMAN | -0.1898975 | 0          |
| sp P08246 ELNE_HUMAN    | -0.1897965 | 1.1932944  |
| sp Q9Y2Q5 LTOR2_HUMAN   | -0.1895332 | 0.45033538 |
| sp O14744 ANM5_HUMAN    | -0.1890755 | 0.7827403  |
| sp Q9Y3Z3 SAMH1_HUMAN   | -0.1887322 | 1.1803217  |
| sp Q00577 PURA_HUMAN    | -0.1884632 | 1.3006523  |
| sp P42566 EPS15_HUMAN   | -0.1877098 | 1.1932944  |
| sp P29350-3 PTN6_HUMAN  | -0.1875629 | 0.65625405 |
| sp Q8IV08 PLD3_HUMAN    | -0.1875153 | 0.09894868 |
| sp P01111 RASN_HUMAN    | -0.1874924 | 0.656254   |
| sp P40763-3 STAT3_HUMAN | -0.1874523 | 1.2095301  |
| sp Q9NUJ1-3 ABHDA_HUMAN | -0.1866665 | 0.7827403  |
| sp O43252 PAPS1_HUMAN   | -0.1866627 | 0.61034113 |
| sp P04440 DPB1_HUMAN    | -0.1864281 | 0          |
| sp Q9BW30 TPPP3_HUMAN   | -0.1859093 | 0.34323573 |
| sp Q9UPN3 MACF1_HUMAN   | -0.1857252 | 1.1888912  |
| sp P61457 PHS_HUMAN     | -0.1856241 | 0.7827403  |

|                         |            |            |
|-------------------------|------------|------------|
| sp P55795 HNRH2_HUMAN   | -0.1854649 | 0.69308156 |
| sp O76011 KRT34_HUMAN   | -0.1848869 | 0          |
| sp P09496-2 CLCA_HUMAN  | -0.1847782 | 1.0485198  |
| sp Q96C23 GALM_HUMAN    | -0.1840725 | 0.09894868 |
| sp Q09028-3 RBBP4_HUMAN | -0.1831188 | 0.656254   |
| sp O14974-3 MYPT1_HUMAN | -0.1829605 | 1.1791906  |
| sp P46779-2 RL28_HUMAN  | -0.1816578 | 0.5111962  |
| sp Q99829 CPNE1_HUMAN   | -0.1806421 | 0.51870745 |
| sp P39687 AN32A_HUMAN   | -0.1800289 | 0.91601294 |
| sp Q9UBW8 CSN7A_HUMAN   | -0.1797104 | 0.91601294 |
| sp Q14344 GNA13_HUMAN   | -0.179472  | 0.8983557  |
| sp P07814 SYEP_HUMAN    | -0.1788397 | 1.2064548  |
| sp Q92769 HDAC2_HUMAN   | -0.1785564 | 0.656254   |
| sp Q9UHQ9 NB5R1_HUMAN   | -0.1785564 | 0.7588735  |
| sp P32455 GBP1_HUMAN    | -0.1781864 | 0.3005443  |
| sp P10606 COX5B_HUMAN   | -0.177248  | 0.5204253  |
| sp P24557-2 THAS_HUMAN  | -0.1771584 | 0.7827403  |
| sp Q13232 NDK3_HUMAN    | -0.176754  | 0.7588735  |
| sp Q969G5 CAVN3_HUMAN   | -0.1753769 | 0.35795313 |
| sp P15529-10 MCP_HUMAN  | -0.1748505 | 0.656254   |
| sp P18085 ARF4_HUMAN    | -0.1746635 | 0.656254   |
| sp P00403 COX2_HUMAN    | -0.1746483 | 0.7588735  |
| sp P35080-2 PROF2_HUMAN | -0.1730957 | 0.656254   |
| sp P62701 RS4X_HUMAN    | -0.172781  | 0.6298893  |
| sp P12111-2 CO6A3_HUMAN | -0.1727734 | 1.214352   |
| sp O75947-2 ATP5H_HUMAN | -0.1726608 | 1.1240381  |
| sp P12955 PEPD_HUMAN    | -0.1726456 | 0.03367973 |
| sp Q92542 NICA_HUMAN    | -0.1722508 | 1.1505735  |
| sp Q9Y3B3 TMED7_HUMAN   | -0.1712475 | 1.1932944  |
| sp P60866-2 RS20_HUMAN  | -0.1705341 | 1.1932944  |
| sp Q12907 LMAN2_HUMAN   | -0.169899  | 0.7957244  |
| sp Q02818 NUCB1_HUMAN   | -0.1696081 | 0.7804068  |
| sp Q9ULZ3-2 ASC_HUMAN   | -0.1694832 | 0          |
| sp P62266 RS23_HUMAN    | -0.1692715 | 0.14672586 |
| sp Q06278 AOXA_HUMAN    | -0.1684551 | 0.19149946 |
| sp P51178-2 PLCD1_HUMAN | -0.1679573 | 0          |
| sp Q96MM6 HS12B_HUMAN   | -0.1674786 | 0.7217418  |
| sp Q13404 UB2V1_HUMAN   | -0.1672993 | 0.04707252 |
| sp P26368-2 U2AF2_HUMAN | -0.1667595 | 1.1932944  |
| sp Q86W92-2 LIPB1_HUMAN | -0.1665487 | 0.45033538 |
| sp P42126-2 ECI1_HUMAN  | -0.1659489 | 1.1932944  |
| sp Q9Y2X3 NOP58_HUMAN   | -0.1651497 | 0.56808305 |
| sp P37108 SRP14_HUMAN   | -0.1644878 | 0.7827403  |
| sp P30086 PEBP1_HUMAN   | -0.1641159 | 1.0076748  |
| sp P23786 CPT2_HUMAN    | -0.1641007 | 0          |

|                         |            |            |
|-------------------------|------------|------------|
| sp Q96S97 MYADM_HUMAN   | -0.1632462 | 0.45033538 |
| sp Q16881-2 TRXR1_HUMAN | -0.1632309 | 0.98032326 |
| sp P16070-7 CD44_HUMAN  | -0.1631584 | 0.61034113 |
| sp P31942-2 HNRH3_HUMAN | -0.1623783 | 0.84879977 |
| sp P52306-4 GDS1_HUMAN  | -0.1613064 | 0.5204253  |
| sp P08572 CO4A2_HUMAN   | -0.1605988 | 1.0475321  |
| sp Q06136 KDSR_HUMAN    | -0.1602287 | 1.1932944  |
| sp Q9UNM6-2 PSD13_HUMAN | -0.160202  | 1.0634323  |
| sp Q6UWY5 OLFL1_HUMAN   | -0.1590424 | 0.9780152  |
| sp Q14258 TRI25_HUMAN   | -0.158989  | 1.0634323  |
| sp P00338 LDHA_HUMAN    | -0.1588745 | 1.1581028  |
| sp P54727 RD23B_HUMAN   | -0.1573105 | 0.5204253  |
| sp Q9NUV9 GIMA4_HUMAN   | -0.1565781 | 0.7957244  |
| sp P25325-2 THTM_HUMAN  | -0.156086  | 0.5692702  |
| sp P50454 SERPH_HUMAN   | -0.1557961 | 1.120602   |
| sp P04222 1C03_HUMAN    | -0.1555748 | 0          |
| sp Q8TD19 NEK9_HUMAN    | -0.1539841 | 0.45033538 |
| sp O15247 CLIC2_HUMAN   | -0.1535339 | 0.39873424 |
| sp P53618 COPB_HUMAN    | -0.1527214 | 0.4378217  |
| sp P05534 1A24_HUMAN    | -0.1527138 | 0.7061832  |
| sp P20073-2 ANXA7_HUMAN | -0.1519642 | 0.2591514  |
| sp P62753 RS6_HUMAN     | -0.1513481 | 0.7061832  |
| sp O75608-2 LYPA1_HUMAN | -0.1512108 | 0.45033538 |
| sp P49257 LMAN1_HUMAN   | -0.1505432 | 0.11612091 |
| sp P35270 SPRE_HUMAN    | -0.1502304 | 0.7498006  |
| sp P62136 PP1A_HUMAN    | -0.1500111 | 0.5204253  |
| sp Q86U42-2 PABP2_HUMAN | -0.1484127 | 0.656254   |
| sp Q9Y3A5 SBDS_HUMAN    | -0.1480923 | 0          |
| sp Q99439 CNN2_HUMAN    | -0.1474991 | 0.26737198 |
| sp O75367-2 H2AY_HUMAN  | -0.14715   | 0.84879977 |
| sp Q99873-3 ANM1_HUMAN  | -0.1471481 | 0.26737198 |
| sp Q96CN7 ISOC1_HUMAN   | -0.1471443 | 0.95332193 |
| sp P62244 RS15A_HUMAN   | -0.1470299 | 0          |
| sp Q14165 MLEC_HUMAN    | -0.1469441 | 1.1505735  |
| sp Q8NF91-4 SYNE1_HUMAN | -0.1462784 | 0.45033538 |
| sp O15145 ARPC3_HUMAN   | -0.1461067 | 0.7061832  |
| sp Q99832 TCPH_HUMAN    | -0.1459541 | 1.1073172  |
| sp P62854 RS26_HUMAN    | -0.1459217 | 1.1932944  |
| sp O43790 KRT86_HUMAN   | -0.1456604 | 0.656254   |
| sp P28062 PSB8_HUMAN    | -0.1456204 | 0.8983557  |
| sp Q8IZ83-3 A16A1_HUMAN | -0.1451531 | 0.95533764 |
| sp Q9H299 SH3L3_HUMAN   | -0.1445141 | 0.19149946 |
| sp Q9Y262-2 EIF3L_HUMAN | -0.1435986 | 0.03367973 |
| sp O00232 PSD12_HUMAN   | -0.141325  | 1.0485198  |
| sp P47897 SYQ_HUMAN     | -0.1413097 | 0.7498006  |

|                         |            |            |
|-------------------------|------------|------------|
| sp P98082-2 DAB2_HUMAN  | -0.1410017 | 0          |
| sp O14786 NRP1_HUMAN    | -0.1409426 | 0.19149946 |
| sp P30084 ECHM_HUMAN    | -0.1409273 | 1.3006523  |
| sp Q15942 ZYX_HUMAN     | -0.1407089 | 0.56808305 |
| sp P63241 IF5A1_HUMAN   | -0.1404839 | 0.656254   |
| sp P09917 LOX5_HUMAN    | -0.1395798 | 0.4075265  |
| sp Q8TBC4-2 UBA3_HUMAN  | -0.1392479 | 0.19149946 |
| sp P55265-4 DSRAD_HUMAN | -0.1392288 | 0.5204253  |
| sp Q969H8 MYDGF_HUMAN   | -0.1392174 | 0.35795313 |
| sp Q9BXP5-2 SRRT_HUMAN  | -0.1387434 | 0.5111962  |
| sp Q96RQ3 MCCA_HUMAN    | -0.1386604 | 0.30372584 |
| sp Q8TD55 PKHO2_HUMAN   | -0.1383495 | 0.19149946 |
| sp A6NMZ7 CO6A6_HUMAN   | -0.137249  | 0.56639653 |
| sp P52790 HXK3_HUMAN    | -0.1371269 | 0.6115017  |
| sp Q9H0W9-2 CK054_HUMAN | -0.1362925 | 0.7498006  |
| sp P21953 ODBB_HUMAN    | -0.1358414 | 0.5204253  |
| sp P28065-2 PSB9_HUMAN  | -0.1355934 | 0.65625405 |
| sp P15144 AMPN_HUMAN    | -0.1350021 | 0.91272414 |
| sp P55060-3 XPO2_HUMAN  | -0.1340675 | 0.6115017  |
| sp P61163 ACTZ_HUMAN    | -0.133997  | 0.6298893  |
| sp P62424 RL7A_HUMAN    | -0.1335907 | 0.56808305 |
| sp Q03154-4 ACY1_HUMAN  | -0.1334553 | 0.35795313 |
| sp Q9P0V9-2 SEP10_HUMAN | -0.1327257 | 1.0076748  |
| sp P54652 HSP72_HUMAN   | -0.1323242 | 0.35795313 |
| sp Q15417 CNN3_HUMAN    | -0.1319981 | 0.5204253  |
| sp O95865 DDAH2_HUMAN   | -0.1315689 | 0.95533764 |
| sp P31930 QCR1_HUMAN    | -0.1310597 | 0.96968824 |
| sp P53004 BIEA_HUMAN    | -0.1300831 | 0.79861414 |
| sp O43488 ARK72_HUMAN   | -0.1299248 | 0.21439649 |
| sp O14787-2 TNPO2_HUMAN | -0.1297836 | 0          |
| sp P56134-3 ATPK_HUMAN  | -0.128727  | 0          |
| sp O60832 DKC1_HUMAN    | -0.1278448 | 0.7827403  |
| sp Q9NSD9 SYFB_HUMAN    | -0.1276188 | 0.30372584 |
| sp P59665 DEF1_HUMAN    | -0.1274777 | 0.7588735  |
| sp P27361 MK03_HUMAN    | -0.1257229 | 0.35795313 |
| sp Q9NYU2-2 UGGG1_HUMAN | -0.1252937 | 1.2653638  |
| sp Q6P2Q9 PRP8_HUMAN    | -0.1250076 | 0.35795313 |
| sp Q16539-2 MK14_HUMAN  | -0.1245718 | 0.19149946 |
| sp O43242 PSMD3_HUMAN   | -0.124197  | 0.48520416 |
| sp O43747-2 AP1G1_HUMAN | -0.1240425 | 0.35193655 |
| sp P31948 STIP1_HUMAN   | -0.1239395 | 0          |
| sp Q709C8-3 VP13C_HUMAN | -0.1236839 | 0.5832693  |
| sp Q93052 LPP_HUMAN     | -0.1234074 | 0.26295313 |
| sp Q13492-2 PICAL_HUMAN | -0.1233959 | 0.5204253  |
| sp P48739 PIPNB_HUMAN   | -0.12257   | 0.19149946 |



|                         |            |            |
|-------------------------|------------|------------|
| sp Q15717-2 ELAV1_HUMAN | -0.1221676 | 0.91601294 |
| sp P34896-2 GLYC_HUMAN  | -0.1218739 | 0          |
| sp P30048-2 PRDX3_HUMAN | -0.121273  | 0.7498006  |
| sp P51553-2 IDH3G_HUMAN | -0.1202059 | 0.19149946 |
| sp Q53GG5-2 PDLI3_HUMAN | -0.1201649 | 0.1342476  |
| sp Q99733-2 NP1L4_HUMAN | -0.1200275 | 0.95332193 |
| sp P08631-2 HCK_HUMAN   | -0.1189995 | 0          |
| sp P18583-10 SON_HUMAN  | -0.1189785 | 0.19149946 |
| sp P40227 TCPZ_HUMAN    | -0.1184349 | 1.1054204  |
| sp P13987-2 CD59_HUMAN  | -0.1182365 | 0.91601294 |
| sp Q15121 PEA15_HUMAN   | -0.1181965 | 0.2178309  |
| sp Q9NZL9 MAT2B_HUMAN   | -0.1176891 | 0.6298893  |
| sp P04424-2 ARLY_HUMAN  | -0.117651  | 0.43103603 |
| sp Q6NY19-2 KANK3_HUMAN | -0.1174936 | 0.45033538 |
| sp Q9H2D6-2 TARA_HUMAN  | -0.117094  | 1.2064548  |
| sp P01920 DQB1_HUMAN    | -0.1169624 | 0.19149946 |
| sp O43294 TGFI1_HUMAN   | -0.1168633 | 0          |
| sp P32456 GBP2_HUMAN    | -0.1161728 | 0.45033538 |
| sp P52597 HNRPF_HUMAN   | -0.1157665 | 0.34323573 |
| sp P49721 PSB2_HUMAN    | -0.1151085 | 0.6070219  |
| sp P12268 IMDH2_HUMAN   | -0.1142273 | 0          |
| sp Q9BRF8-2 CPPED_HUMAN | -0.1136055 | 0.1558116  |
| sp Q12931-2 TRAP1_HUMAN | -0.1135445 | 0.35795313 |
| sp Q9Y376 CAB39_HUMAN   | -0.112917  | 0.35795313 |
| sp Q9H4G4 GAPR1_HUMAN   | -0.1125793 | 0.5204253  |
| sp Q96G03 PGM2_HUMAN    | -0.1120911 | 0.48353976 |
| sp Q9NZ01 TECR_HUMAN    | -0.1118965 | 0.40256184 |
| sp Q13409-3 DC1I2_HUMAN | -0.1117258 | 0.6509351  |
| sp P62314 SMD1_HUMAN    | -0.1116161 | 0.19149946 |
| sp Q96BW5-2 PTER_HUMAN  | -0.1114235 | 0          |
| sp Q04323-2 UBXN1_HUMAN | -0.1111908 | 0          |
| sp Q16630-2 CPSF6_HUMAN | -0.1108646 | 0.7061832  |
| sp O60313-10 OPA1_HUMAN | -0.1105928 | 0.19149946 |
| sp P22314 UBA1_HUMAN    | -0.1103878 | 0.14575773 |
| sp P30626-2 SORCN_HUMAN | -0.1101437 | 0.43103603 |
| sp P07951 TPM2_HUMAN    | -0.1100845 | 0.29066643 |
| sp P29692-2 EF1D_HUMAN  | -0.1097412 | 0.7061832  |
| sp P07951-3 TPM2_HUMAN  | -0.1091366 | 0.5111962  |
| sp P58107 EPIPL_HUMAN   | -0.1082258 | 0.8235348  |
| sp P35579-2 MYH9_HUMAN  | -0.1081429 | 0.656254   |
| sp Q27J81-2 INF2_HUMAN  | -0.1076946 | 0.04707252 |
| sp Q10567-2 AP1B1_HUMAN | -0.1076126 | 0.5204253  |
| sp Q969V3-2 NCLN_HUMAN  | -0.10742   | 0.5204253  |
| sp P35754 GLRX1_HUMAN   | -0.1065254 | 0.48520416 |
| sp O95861-4 BPNT1_HUMAN | -0.1063423 | 0.6298893  |

|                         |            |            |
|-------------------------|------------|------------|
| sp P35858-2 ALS_HUMAN   | -0.1056719 | 0          |
| sp P49720 PSB3_HUMAN    | -0.1053543 | 0.26737198 |
| sp O00429-6 DNM1L_HUMAN | -0.1043243 | 0.5832693  |
| sp P55786 PSA_HUMAN     | -0.1042137 | 1.1721778  |
| sp P05165-2 PCCA_HUMAN  | -0.1032219 | 0.6563392  |
| sp Q15274 NADC_HUMAN    | -0.1032181 | 0.2178309  |
| sp P24534 EF1B_HUMAN    | -0.1031761 | 0.7827403  |
| sp Q9BVK6 TMED9_HUMAN   | -0.1030216 | 0.5204253  |
| sp P26599-2 PTBP1_HUMAN | -0.1028748 | 0.08891098 |
| sp P04406 G3P_HUMAN     | -0.1028481 | 0          |
| sp P09972 ALDOC_HUMAN   | -0.1023293 | 0.33495146 |
| sp Q93034 CUL5_HUMAN    | -0.1020622 | 0          |
| sp P25789 PSA4_HUMAN    | -0.1017227 | 1.0475321  |
| sp P00387-3 NB5R3_HUMAN | -0.1016903 | 0.44572112 |
| sp O60884 DNJA2_HUMAN   | -0.1016254 | 0.1342476  |
| sp P50990 TCPQ_HUMAN    | -0.1015625 | 0.83940434 |
| sp P29992 GNA11_HUMAN   | -0.1015339 | 0.45033538 |
| sp P55735-2 SEC13_HUMAN | -0.1014118 | 0.30372584 |
| sp P33176 KINH_HUMAN    | -0.1014023 | 0.77163273 |
| sp Q02790 FKBP4_HUMAN   | -0.1011562 | 0.8983557  |
| sp P30566 PUR8_HUMAN    | -0.100996  | 0.656254   |
| sp Q04837 SSBP_HUMAN    | -0.100893  | 0.19149946 |
| sp P17987 TCPA_HUMAN    | -0.1001244 | 1.261843   |
| sp P55209-2 NP1L1_HUMAN | -0.1001015 | 0          |
| sp Q9NP72 RAB18_HUMAN   | -0.0990143 | 0.7588735  |
| sp Q8TAT6-2 NPL4_HUMAN  | -0.0988846 | 0.30372584 |
| sp P12277 KCRB_HUMAN    | -0.0981503 | 0.62912476 |
| sp P34897-2 GLYM_HUMAN  | -0.0976133 | 0.51870745 |
| sp Q9BT78 CSN4_HUMAN    | -0.0967197 | 0.06291623 |
| sp P42224-2 STAT1_HUMAN | -0.0963268 | 0.11949348 |
| sp Q13464 ROCK1_HUMAN   | -0.0956001 | 0.04707252 |
| sp Q06210-2 GFPT1_HUMAN | -0.0955124 | 0.56808305 |
| sp Q9Y5S9-2 RBM8A_HUMAN | -0.0953732 | 0.7061832  |
| sp Q86UX7-2 URP2_HUMAN  | -0.0949345 | 0.94599336 |
| sp Q14498-2 RBM39_HUMAN | -0.0943337 | 0.37060758 |
| sp P50395 GDIB_HUMAN    | -0.0938435 | 0.2746514  |
| sp P36873-2 PP1G_HUMAN  | -0.0936775 | 0.45033538 |
| sp P39023 RL3_HUMAN     | -0.0935154 | 0.7588735  |
| sp Q9H2G2-2 SLK_HUMAN   | -0.0932426 | 0          |
| sp Q9Y6W5 WASF2_HUMAN   | -0.0930157 | 0.7061832  |
| sp P07741 APT_HUMAN     | -0.0925474 | 0.02662771 |
| sp O00534 VMA5A_HUMAN   | -0.0923729 | 0.11949348 |
| sp Q9BZF9-2 UACA_HUMAN  | -0.0923481 | 0.19149946 |
| sp P07195 LDHB_HUMAN    | -0.0920162 | 0.79197884 |
| sp P04792 HSPB1_HUMAN   | -0.0915585 | 0.9296698  |

|                         |            |            |
|-------------------------|------------|------------|
| sp P26639-2 SYTC_HUMAN  | -0.0907135 | 0.50639904 |
| sp O60763-2 USO1_HUMAN  | -0.0906239 | 0.08684197 |
| sp Q9UBQ5 EIF3K_HUMAN   | -0.0906162 | 0          |
| sp Q13363-2 CTBP1_HUMAN | -0.0905495 | 0.19149946 |
| sp P14618 KPYM_HUMAN    | -0.0901222 | 0.09339783 |
| sp Q9BUT1 BDH2_HUMAN    | -0.0898628 | 0.48520416 |
| sp P05166-2 PCCB_HUMAN  | -0.0896187 | 0.17511293 |
| sp Q9BRR6-2 ADPGK_HUMAN | -0.0891819 | 0.45033538 |
| sp Q16181-2 SEPT7_HUMAN | -0.0885201 | 1.1959618  |
| sp Q13243-3 SRSF5_HUMAN | -0.0879669 | 0.656254   |
| sp Q13185 CBX3_HUMAN    | -0.0877647 | 0.5111962  |
| sp P26885 FKBP2_HUMAN   | -0.0876007 | 0.19149946 |
| sp Q05682 CALD1_HUMAN   | -0.0875673 | 0.2178309  |
| sp O15031 PLXB2_HUMAN   | -0.0874729 | 0.23480128 |
| sp Q13724-2 MOGS_HUMAN  | -0.0874176 | 0.26546443 |
| sp Q8N684-3 CPSF7_HUMAN | -0.0871544 | 0.312067   |
| sp Q8N163-2 CCAR2_HUMAN | -0.0860844 | 0.7061832  |
| sp Q12765 SCRN1_HUMAN   | -0.0858765 | 0.1342476  |
| sp P05455 LA_HUMAN      | -0.08496   | 0.02174174 |
| sp Q53T59 H1BP3_HUMAN   | -0.0837641 | 0.19149946 |
| sp P14780 MMP9_HUMAN    | -0.0837059 | 0.29066643 |
| sp P21912 SDHB_HUMAN    | -0.0829811 | 0.2178309  |
| sp O60234 GMFG_HUMAN    | -0.0827599 | 0.09894868 |
| sp P27487 DPP4_HUMAN    | -0.0826321 | 0.21439649 |
| sp P09493-8 TPM1_HUMAN  | -0.0818138 | 0.3852666  |
| sp P52789 HXK2_HUMAN    | -0.0814705 | 0          |
| sp Q08380 LG3BP_HUMAN   | -0.0799522 | 0.01653191 |
| sp P35998 PRS7_HUMAN    | -0.0798664 | 0.4668234  |
| sp P41250 GARS_HUMAN    | -0.0796166 | 0.24295025 |
| sp P39656-3 OST48_HUMAN | -0.0794125 | 0.5886828  |
| sp P46108 CRK_HUMAN     | -0.0793743 | 0.19410844 |
| sp O75112-7 LDB3_HUMAN  | -0.0791245 | 0.2178309  |
| sp P21266 GSTM3_HUMAN   | -0.0789661 | 0.14927356 |
| sp Q9NRV9 HEBP1_HUMAN   | -0.078867  | 0.97209185 |
| sp Q15582 BGH3_HUMAN    | -0.0772095 | 0.79584783 |
| sp P26640 SYVC_HUMAN    | -0.0771103 | 0.18414244 |
| sp P20039 2B1B_HUMAN    | -0.0770245 | 0.656254   |
| sp O14579 COPE_HUMAN    | -0.0764923 | 0.65625405 |
| sp P48681 NEST_HUMAN    | -0.0756817 | 0.4116133  |
| sp P49961-6 ENTP1_HUMAN | -0.0755348 | 0.35795313 |
| sp Q99714 HCD2_HUMAN    | -0.0753784 | 0.68888646 |
| sp P15880 RS2_HUMAN     | -0.0739841 | 0.30372584 |
| sp Q9NQW7-3 XPP1_HUMAN  | -0.0735226 | 0.10861364 |
| sp Q9C0B1 FTO_HUMAN     | -0.0728149 | 0.19149946 |
| sp Q96DG6 CMBL_HUMAN    | -0.0706968 | 0.35795313 |

|                         |            |            |
|-------------------------|------------|------------|
| sp O75396 SC22B_HUMAN   | -0.0706139 | 0.5832693  |
| sp P22894 MMP8_HUMAN    | -0.070612  | 0          |
| sp P14550 AK1A1_HUMAN   | -0.0697784 | 0.2680669  |
| sp P46977 STT3A_HUMAN   | -0.0694847 | 0.45033538 |
| sp P12109 CO6A1_HUMAN   | -0.0694008 | 0.9171579  |
| sp Q5JRX3-3 PREP_HUMAN  | -0.0693893 | 0.45033538 |
| sp Q92629-3 SGCD_HUMAN  | -0.0690842 | 0.21439649 |
| sp Q6UVK1 CSPG4_HUMAN   | -0.0674648 | 0.06842031 |
| sp Q9Y5M8 SRPRB_HUMAN   | -0.0666885 | 0.5111962  |
| sp P02511 CRYAB_HUMAN   | -0.0662212 | 0.2178309  |
| sp Q5SSJ5-2 HP1B3_HUMAN | -0.0661526 | 0.5111962  |
| sp P26196 DDX6_HUMAN    | -0.065155  | 0.09894868 |
| sp Q0ZGT2-4 NEXN_HUMAN  | -0.0643578 | 0.5886828  |
| sp O14617-4 AP3D1_HUMAN | -0.0643101 | 0.19149946 |
| sp P24821-4 TENA_HUMAN  | -0.0640354 | 0.04817784 |
| sp P46459 NSF_HUMAN     | -0.0634422 | 0          |
| sp P22234-2 PUR6_HUMAN  | -0.0631638 | 0.6115017  |
| sp A0AVT1 UBA6_HUMAN    | -0.0626278 | 0.21439649 |
| sp Q9Y305-4 ACOT9_HUMAN | -0.0623093 | 0          |
| sp Q9NYL9 TMOD3_HUMAN   | -0.062191  | 0.30372584 |
| sp Q14894 CRYM_HUMAN    | -0.0617046 | 0.19149946 |
| sp P28066 PSA5_HUMAN    | -0.0606689 | 0.26737198 |
| sp O75915 PRAF3_HUMAN   | -0.0601864 | 0.35795313 |
| sp Q7LG56-6 RIR2B_HUMAN | -0.0598412 | 0.19149946 |
| sp Q9HAV0 GBB4_HUMAN    | -0.0595341 | 0.09894868 |
| sp P62888 RL30_HUMAN    | -0.0591354 | 0.91601294 |
| sp P30085 KCY_HUMAN     | -0.0587988 | 0.91601294 |
| sp P24158 PRTN3_HUMAN   | -0.0586929 | 0.5204253  |
| sp P57088 TMM33_HUMAN   | -0.0576859 | 0          |
| sp Q07065 CKAP4_HUMAN   | -0.0576096 | 0.86551994 |
| sp O76041-2 NEBL_HUMAN  | -0.0574188 | 0          |
| sp O43143 DHX15_HUMAN   | -0.0572929 | 0.09339783 |
| sp O15127 SCAM2_HUMAN   | -0.0572662 | 0.35795313 |
| sp Q9BZZ5-5 API5_HUMAN  | -0.0570822 | 0.26737198 |
| sp Q12792-3 TWF1_HUMAN  | -0.0566521 | 0.19149946 |
| sp O75828 CBR3_HUMAN    | -0.0560226 | 0          |
| sp P49821-2 NDUV1_HUMAN | -0.0548582 | 0.27902296 |
| sp P13760 2B14_HUMAN    | -0.0536308 | 0.1558116  |
| sp Q9BZE9-2 ASPC1_HUMAN | -0.0534077 | 0          |
| sp O14980 XPO1_HUMAN    | -0.0532494 | 0.35795313 |
| sp Q9UNE7-2 CHIP_HUMAN  | -0.0532417 | 0          |
| sp Q9BWD1 THIC_HUMAN    | -0.0529766 | 0.19149946 |
| sp O75937 DNJC8_HUMAN   | -0.0523033 | 0.1342476  |
| sp B5ME19 EIFCL_HUMAN   | -0.0522652 | 0.2178309  |
| sp P50991-2 TCPD_HUMAN  | -0.0499001 | 0.47741386 |

|                         |            |            |
|-------------------------|------------|------------|
| sp P54920 SNAA_HUMAN    | -0.0489845 | 0.4668234  |
| sp P05787-2 K2C8_HUMAN  | -0.0484962 | 0.38952866 |
| sp O14818 PSA7_HUMAN    | -0.0466805 | 0.3516469  |
| sp P61224 RAP1B_HUMAN   | -0.0458584 | 0          |
| sp P62633-3 CNBP_HUMAN  | -0.0454121 | 0          |
| sp P19971 TYPH_HUMAN    | -0.0447197 | 0.5939212  |
| sp Q92688-2 AN32B_HUMAN | -0.0446854 | 0.35795313 |
| sp Q63ZY3-3 KANK2_HUMAN | -0.0442696 | 0.14672586 |
| sp P23528 COF1_HUMAN    | -0.0437012 | 0.368128   |
| sp P22059 OSBP1_HUMAN   | -0.0432549 | 0          |
| sp Q8WX93-5 PALLD_HUMAN | -0.0419235 | 0.09894868 |
| sp P36543-2 VATE1_HUMAN | -0.0416126 | 0.09894868 |
| sp O00487 PSDE_HUMAN    | -0.0397873 | 0          |
| sp Q9H9B4 SFXN1_HUMAN   | -0.0390167 | 0.7827403  |
| sp Q92556 ELMO1_HUMAN   | -0.0388546 | 0.1342476  |
| sp P43686 PRS6B_HUMAN   | -0.0386486 | 0.30513477 |
| sp P15153 RAC2_HUMAN    | -0.0380974 | 0          |
| sp P53602 MVD1_HUMAN    | -0.0379982 | 0.7061832  |
| sp Q13630 FCL_HUMAN     | -0.0369434 | 0.19149946 |
| sp P01034 CYTC_HUMAN    | -0.0368557 | 0.19149946 |
| sp Q9HD89 RETN_HUMAN    | -0.0365257 | 0          |
| sp P62195 PRS8_HUMAN    | -0.0360355 | 0          |
| sp O95479 G6PE_HUMAN    | -0.0357475 | 0          |
| sp Q9UKV3-5 ACINU_HUMAN | -0.0356064 | 0.1342476  |
| sp P55809 SCOT1_HUMAN   | -0.0350037 | 0.09894868 |
| sp Q13126-2 MTAP_HUMAN  | -0.034893  | 0.03367973 |
| sp P09874 PARP1_HUMAN   | -0.0348301 | 0.39873424 |
| sp P41091 IF2G_HUMAN    | -0.0338097 | 0.14672586 |
| sp Q16775-2 GLO2_HUMAN  | -0.0337887 | 0.35795313 |
| sp P67809 YBOX1_HUMAN   | -0.0337448 | 0.45033538 |
| sp O75489 NDUS3_HUMAN   | -0.0332088 | 0.30372584 |
| sp P12004 PCNA_HUMAN    | -0.0329094 | 0          |
| sp P62829 RL23_HUMAN    | -0.0317535 | 0.19149946 |
| sp P51692 STA5B_HUMAN   | -0.0302134 | 0.19149946 |
| sp O15511 ARPC5_HUMAN   | -0.0301991 | 0.21439649 |
| sp Q9BUF5 TBB6_HUMAN    | -0.029953  | 0.6298893  |
| sp O75955 FLOT1_HUMAN   | -0.0298996 | 0.3812125  |
| sp Q14914-2 PTGR1_HUMAN | -0.0291214 | 0.1342476  |
| sp Q96AY3 FKB10_HUMAN   | -0.0291042 | 0          |
| sp Q13561-2 DCTN2_HUMAN | -0.0288296 | 0.51929367 |
| sp P09543-2 CN37_HUMAN  | -0.0284748 | 0.20467198 |
| sp P45974-2 UBP5_HUMAN  | -0.0279255 | 0.110441   |
| sp Q7KZF4 SND1_HUMAN    | -0.0267448 | 0.01819076 |
| sp P11498 PYC_HUMAN     | -0.0266685 | 0.1558116  |
| sp Q86UX2-2 ITIH5_HUMAN | -0.02637   | 0.312067   |

|                         |            |            |
|-------------------------|------------|------------|
| sp P11215-2 ITAM_HUMAN  | -0.0258484 | 0.17511293 |
| sp Q9UEY8 ADDG_HUMAN    | -0.0252876 | 0.04454162 |
| sp Q07960 RHG01_HUMAN   | -0.0247231 | 0.4075265  |
| sp P55884-2 EIF3B_HUMAN | -0.0245533 | 0.09339783 |
| sp Q16629-2 SRSF7_HUMAN | -0.024498  | 0.09750395 |
| sp O00483 NDUA4_HUMAN   | -0.0239429 | 0          |
| sp O95571 ETHE1_HUMAN   | -0.0228252 | 0.14672586 |
| sp O60831 PRAF2_HUMAN   | -0.0227375 | 0.09894868 |
| sp Q99497 PARK7_HUMAN   | -0.0226288 | 0.70235044 |
| sp P53041 PPP5_HUMAN    | -0.0225849 | 0          |
| sp P04844 RPN2_HUMAN    | -0.0225306 | 0.04454162 |
| sp P52907 CAZA1_HUMAN   | -0.0223389 | 0.3852666  |
| sp O00170 AIP_HUMAN     | -0.022028  | 0.21439649 |
| sp Q6UW68 TM205_HUMAN   | -0.0217705 | 0.45033538 |
| sp O14828-2 SCAM3_HUMAN | -0.0215645 | 0.09894868 |
| sp Q13423 NNTM_HUMAN    | -0.0206928 | 0.11949348 |
| sp Q01995 TAGL_HUMAN    | -0.0206833 | 0.20517272 |
| sp Q8N392 RHG18_HUMAN   | -0.0206099 | 0          |
| sp Q9UBC2-2 EP15R_HUMAN | -0.0195723 | 0.19149946 |
| sp Q13885 TBB2A_HUMAN   | -0.0191956 | 0.19149946 |
| sp P50452 SPB8_HUMAN    | -0.019062  | 0.45033538 |
| sp Q14203-3 DCTN1_HUMAN | -0.0182419 | 0.19410844 |
| sp O00151 PDLI1_HUMAN   | -0.0181236 | 0.2699497  |
| sp P48643 TCPE_HUMAN    | -0.017189  | 0.02863072 |
| sp Q15436 SC23A_HUMAN   | -0.0170994 | 0.6298893  |
| sp O60506-3 HNRPQ_HUMAN | -0.0168991 | 0.06291623 |
| sp P46783 RS10_HUMAN    | -0.0166321 | 0.19149946 |
| sp Q9NY33 DPP3_HUMAN    | -0.0161133 | 0.17511293 |
| sp P78417-3 GSTO1_HUMAN | -0.015955  | 0          |
| sp P35579 MYH9_HUMAN    | -0.0155678 | 0.20216827 |
| sp P61020 RAB5B_HUMAN   | -0.0153313 | 0.09894868 |
| sp Q6NVY1 HIBCH_HUMAN   | -0.0152645 | 0.06291623 |
| sp Q92499 DDX1_HUMAN    | -0.0144167 | 0.3852666  |
| sp P84085 ARF5_HUMAN    | -0.0143929 | 0.656254   |
| sp O00567 NOP56_HUMAN   | -0.0137825 | 0.2207585  |
| sp Q9Y230 RUVB2_HUMAN   | -0.0135937 | 0.4024821  |
| sp P46821 MAP1B_HUMAN   | -0.0122662 | 0.09750395 |
| sp P51665 PSMD7_HUMAN   | -0.0099716 | 0          |
| sp POC0S5 H2AZ_HUMAN    | -0.009819  | 0          |
| sp Q96CX2 KCD12_HUMAN   | -0.0097198 | 0.16178675 |
| sp Q9H008 LHPP_HUMAN    | -0.009058  | 0.1500082  |
| sp Q9C0C2 TB182_HUMAN   | -0.0087395 | 0.20467198 |
| sp P78417-2 GSTO1_HUMAN | -0.0086708 | 0          |
| sp Q9UIJ7 KAD3_HUMAN    | -0.0082092 | 0.1500082  |
| sp P34932 HSP74_HUMAN   | -0.0080681 | 0.27907842 |

|                         |            |            |
|-------------------------|------------|------------|
| sp Q8N1G4 LRC47_HUMAN   | -0.0073528 | 0.16649151 |
| sp Q12797-10 ASPH_HUMAN | -0.006794  | 0.21680334 |
| sp P01911 2B1F_HUMAN    | -0.0067558 | 0          |
| sp P14174 MIF_HUMAN     | -0.0044079 | 0.2178309  |
| sp O00571-2 DDX3X_HUMAN | -0.0035191 | 0.5204253  |
| sp O76003 GLRX3_HUMAN   | -0.0012665 | 0          |
| sp Q08257 QOR_HUMAN     | -6.56E-04  | 0.30513477 |
| sp P09619 PGFRB_HUMAN   | -1.37E-04  | 0          |
| sp P50502 F10A1_HUMAN   | -7.63E-05  | 0.1063047  |
| sp P06753-2 TPM3_HUMAN  | 2.48E-05   | 0.19149946 |
| sp Q15005 SPCS2_HUMAN   | 8.58E-04   | 0.35795313 |
| sp P08571 CD14_HUMAN    | 0.00160789 | 0          |
| sp Q15631 TSN_HUMAN     | 0.00243187 | 0.1342476  |
| sp P68400 CSK21_HUMAN   | 0.00247002 | 0          |
| sp Q14204 DYHC1_HUMAN   | 0.00282097 | 0.17735331 |
| sp P36776-3 LONM_HUMAN  | 0.00373268 | 0.04454162 |
| sp P62304 RUXE_HUMAN    | 0.00404549 | 0.19149946 |
| sp Q06323 PSME1_HUMAN   | 0.00444794 | 0.26737198 |
| sp O75306-2 NDUS2_HUMAN | 0.00452995 | 0.30372584 |
| sp Q99460 PSMD1_HUMAN   | 0.0056324  | 0.33691242 |
| sp O75323 NIPS2_HUMAN   | 0.0059166  | 0.19149946 |
| sp P24844 MYL9_HUMAN    | 0.00601006 | 0.09894868 |
| sp P30837 AL1B1_HUMAN   | 0.00662804 | 0.14672586 |
| sp Q14980-2 NUMA1_HUMAN | 0.00734901 | 0.13745387 |
| sp O43681 ASNA_HUMAN    | 0.00738907 | 0.09894868 |
| sp P0DOX3 IGD_HUMAN     | 0.00745392 | 0          |
| sp P25787 PSA2_HUMAN    | 0.00786591 | 0.2207585  |
| sp P50570-2 DYN2_HUMAN  | 0.00875092 | 0.5832693  |
| sp P23497 SP100_HUMAN   | 0.00985909 | 0          |
| sp P27695 APEX1_HUMAN   | 0.0099268  | 0          |
| sp O60664-4 PLIN3_HUMAN | 0.01015854 | 0.02174174 |
| sp P10599-2 THIO_HUMAN  | 0.01155853 | 0.1342476  |
| sp P35749 MYH11_HUMAN   | 0.01179886 | 0.18928571 |
| sp P30533 AMRP_HUMAN    | 0.01296043 | 0.09339783 |
| sp P31939 PUR9_HUMAN    | 0.01303864 | 0.24613085 |
| sp P11586 C1TC_HUMAN    | 0.01366425 | 0.09894868 |
| sp P51911 CNN1_HUMAN    | 0.01413345 | 0.18925954 |
| sp P54819-2 KAD2_HUMAN  | 0.01461601 | 0          |
| sp Q86VP6 CAND1_HUMAN   | 0.0147934  | 0.03601474 |
| sp O43865 SAHH2_HUMAN   | 0.01570129 | 0.09894868 |
| sp Q8NHV1 GIMA7_HUMAN   | 0.0159111  | 0          |
| sp P43243 MATR3_HUMAN   | 0.01607895 | 0.26737198 |
| sp P84098 RL19_HUMAN    | 0.01673126 | 0          |
| sp A0FGR8-2 ESYT2_HUMAN | 0.01717377 | 0.1342476  |
| sp O43175 SERA_HUMAN    | 0.01971626 | 0.55270666 |

|                         |            |            |
|-------------------------|------------|------------|
| sp Q9UBE0 SAE1_HUMAN    | 0.0202713  | 0.35795313 |
| sp Q9HC38 GLOD4_HUMAN   | 0.02279854 | 0.06986027 |
| sp P80303-2 NUCB2_HUMAN | 0.0232544  | 0.6298893  |
| sp P23193-2 TCEA1_HUMAN | 0.02389622 | 0          |
| sp Q13177 PAK2_HUMAN    | 0.02598    | 0          |
| sp P08708 RS17_HUMAN    | 0.02640152 | 0.06842031 |
| sp P62277 RS13_HUMAN    | 0.02713585 | 0.45563722 |
| sp P17980 PRS6A_HUMAN   | 0.02727699 | 0.21989624 |
| sp P61201-2 CSN2_HUMAN  | 0.02762985 | 0.19149946 |
| sp Q96C19 EFHD2_HUMAN   | 0.02763367 | 0.09894868 |
| sp Q8NCW5 NNRE_HUMAN    | 0.0285244  | 0.8983557  |
| sp O00264 PGRC1_HUMAN   | 0.02887344 | 0.11949348 |
| sp O75746-2 CMC1_HUMAN  | 0.02970886 | 0.2178309  |
| sp Q99961-3 SH3G1_HUMAN | 0.02999497 | 0          |
| sp P00488 F13A_HUMAN    | 0.03003883 | 0.16966018 |
| sp Q96HC4 PDLI5_HUMAN   | 0.03015518 | 0          |
| sp P48147 PPCE_HUMAN    | 0.03066826 | 0.11612091 |
| sp P61225 RAP2B_HUMAN   | 0.03162289 | 0          |
| sp P54578-3 UBP14_HUMAN | 0.03173447 | 0.30372584 |
| sp Q15075 EEA1_HUMAN    | 0.03199959 | 0.43852544 |
| sp Q14152 EIF3A_HUMAN   | 0.03351021 | 0.2178309  |
| sp O15372 EIF3H_HUMAN   | 0.03407574 | 0          |
| sp P28072 PSB6_HUMAN    | 0.03487396 | 0.09894868 |
| sp P46063 RECQ1_HUMAN   | 0.03519058 | 0.17511293 |
| sp P49593-2 PPM1F_HUMAN | 0.03666306 | 0.06291623 |
| sp O15061 SYNEM_HUMAN   | 0.03671932 | 0.04454162 |
| sp P22033 MUTA_HUMAN    | 0.03676987 | 0          |
| sp P51688 SPHM_HUMAN    | 0.03692818 | 0.21439649 |
| sp P54136 SYRC_HUMAN    | 0.03773689 | 0.11949348 |
| sp P50914 RL14_HUMAN    | 0.03795815 | 0.2178309  |
| sp P61026 RAB10_HUMAN   | 0.03848171 | 0          |
| sp P08237-3 PFKAM_HUMAN | 0.03876114 | 0          |
| sp P50579-2 MAP2_HUMAN  | 0.04063797 | 0          |
| sp Q9UJZ1-2 STML2_HUMAN | 0.04171753 | 0.2178309  |
| sp Q14112-2 NID2_HUMAN  | 0.04245949 | 0.23480128 |
| sp P23142 FBLN1_HUMAN   | 0.04329681 | 0.06986027 |
| sp P04004 VTNC_HUMAN    | 0.04371834 | 0.14672586 |
| sp P28074 PSB5_HUMAN    | 0.04502487 | 0.20467198 |
| sp O95336 6PGL_HUMAN    | 0.04512215 | 0.26737198 |
| sp P17213 BPI_HUMAN     | 0.04581451 | 0.06291623 |
| sp Q9Y224 RTRAF_HUMAN   | 0.04638863 | 0.09339783 |
| sp P09104-2 ENOG_HUMAN  | 0.04793644 | 0.51870745 |
| sp Q8WXX5 DNJC9_HUMAN   | 0.04829407 | 0          |
| sp O43615 TIM44_HUMAN   | 0.0483408  | 0          |
| sp Q15019-2 SEPT2_HUMAN | 0.04846191 | 0.56228566 |



|                           |            |            |
|---------------------------|------------|------------|
| sp P21399 ACOC_HUMAN      | 0.05005169 | 0.11612091 |
| sp P0CG38 POTEI_HUMAN     | 0.05065727 | 0          |
| sp Q9NR45 SIAS_HUMAN      | 0.05121422 | 0.2810592  |
| sp P06748-2 NPM_HUMAN     | 0.05129051 | 0.61034113 |
| sp P16219 ACADS_HUMAN     | 0.0524416  | 0.09339783 |
| sp P58546 MTPN_HUMAN      | 0.05247498 | 0.35795313 |
| sp Q9Y281 COF2_HUMAN      | 0.05509949 | 0.2178309  |
| sp Q9BS40 LXN_HUMAN       | 0.05510712 | 0.03043297 |
| sp P42704 LPPRC_HUMAN     | 0.05655861 | 0.11949348 |
| sp Q16134-3 ETFD_HUMAN    | 0.05716515 | 0.19149946 |
| sp Q5EBM0 CMPK2_HUMAN     | 0.05771828 | 0.7061832  |
| sp Q6XQN6-2 PNCB_HUMAN    | 0.05907631 | 0.7455631  |
| sp P12270 TPR_HUMAN       | 0.06000137 | 0.01779479 |
| sp Q9Y639-4 NPTN_HUMAN    | 0.06087112 | 0          |
| sp P49755 TMEDA_HUMAN     | 0.06149101 | 0.30372584 |
| sp Q9UJU6-2 DBNL_HUMAN    | 0.06164551 | 0.30372584 |
| sp P30520 PURA2_HUMAN     | 0.06276512 | 0          |
| sp Q14847 LASP1_HUMAN     | 0.06457329 | 0.01311907 |
| sp Q9UBT2 SAE2_HUMAN      | 0.06526756 | 0          |
| sp P51636-2 CAV2_HUMAN    | 0.06585693 | 0          |
| sp P67936 TPM4_HUMAN      | 0.06741524 | 0.47741386 |
| sp Q99538-2 LG MN_HUMAN   | 0.06756783 | 0.19149946 |
| sp P04062-2 GLCM_HUMAN    | 0.06759834 | 0.45033538 |
| sp O95466-2 FMNL1_HUMAN   | 0.06777954 | 0.7827403  |
| sp Q9NUQ9 FA49B_HUMAN     | 0.06778526 | 0.7061832  |
| sp Q5R3I4 TTC38_HUMAN     | 0.0678215  | 0.45033538 |
| sp P16298-4 PP2BB_HUMAN   | 0.06887054 | 0.312067   |
| sp O95302-3 FKBP9_HUMAN   | 0.06952286 | 0.45033538 |
| sp Q15008-4 PSMD6_HUMAN   | 0.07192421 | 0.45033538 |
| sp Q9UI12-2 VATH_HUMAN    | 0.07193565 | 0.20467198 |
| sp Q14254 FLOT2_HUMAN     | 0.07308006 | 0.1500082  |
| sp Q92896-2 GSLG1_HUMAN   | 0.07408333 | 1.0918401  |
| sp P62736 ACTA_HUMAN      | 0.07535744 | 0          |
| sp Q92900-2 RENT1_HUMAN   | 0.07561684 | 0.14927356 |
| sp Q13526 PIN1_HUMAN      | 0.07612419 | 0.45033538 |
| sp Q16401-2 PSMD5_HUMAN   | 0.07741356 | 0.70235044 |
| sp Q9NZ32 ARP10_HUMAN     | 0.07759857 | 0.45033538 |
| sp P61088 UBE2N_HUMAN     | 0.07813072 | 0.45033538 |
| sp Q15257-2 PTPA_HUMAN    | 0.07868004 | 0.20467198 |
| sp P61803 DAD1_HUMAN      | 0.0787468  | 0          |
| sp Q8WVM8 SCFD1_HUMAN     | 0.07989502 | 0.37060758 |
| sp O75340-2 PDCD6_HUMAN   | 0.08143997 | 0.2178309  |
| sp A0A0C4DH31 HV118_HUMAN | 0.08166504 | 0          |
| sp O75368 SH3L1_HUMAN     | 0.082798   | 0.91601294 |
| sp Q9NZK5 ADA2_HUMAN      | 0.0834465  | 0.19149946 |

|                         |            |            |
|-------------------------|------------|------------|
| sp P62081 RS7_HUMAN     | 0.08347893 | 0.04707252 |
| sp Q16774 KGUA_HUMAN    | 0.08499527 | 0          |
| sp P20160 CAP7_HUMAN    | 0.0850296  | 0.09894868 |
| sp Q08945 SSRP1_HUMAN   | 0.08506775 | 0.09339783 |
| sp O94776 MTA2_HUMAN    | 0.0852356  | 0.06291623 |
| sp Q9NZB2-6 F120A_HUMAN | 0.08538818 | 0.312067   |
| sp P60983 GMFB_HUMAN    | 0.0857029  | 0.09894868 |
| sp Q9BTV4 TMM43_HUMAN   | 0.08623123 | 0.48520416 |
| sp Q13162 PRDX4_HUMAN   | 0.08706093 | 0.5832693  |
| sp P62191-2 PRS4_HUMAN  | 0.08908653 | 0.2178309  |
| sp P20591 MX1_HUMAN     | 0.08988953 | 0.56808305 |
| sp P27694 RFA1_HUMAN    | 0.09035873 | 0          |
| sp Q8TDL5 BPIB1_HUMAN   | 0.09057999 | 0.5283125  |
| sp P62333 PRS10_HUMAN   | 0.09116364 | 0.37060758 |
| sp Q14515-2 SPRL1_HUMAN | 0.09238625 | 0.19149946 |
| sp Q14195-2 DPYL3_HUMAN | 0.09549713 | 0.8150251  |
| sp Q9NR12-2 PDLI7_HUMAN | 0.09594154 | 0.5832693  |
| sp P61758 PFD3_HUMAN    | 0.09721184 | 0.19149946 |
| sp O75503 CLN5_HUMAN    | 0.10000992 | 0          |
| sp O15400-2 STX7_HUMAN  | 0.10021019 | 0.14672586 |
| sp P84243 H33_HUMAN     | 0.10060501 | 0          |
| sp P30466 1B18_HUMAN    | 0.10284424 | 0          |
| sp Q9C0E8-4 LNP_HUMAN   | 0.10398006 | 0.45033538 |
| sp P00740 FA9_HUMAN     | 0.10404205 | 0          |
| sp P15374 UCLH3_HUMAN   | 0.10422134 | 0.6298893  |
| sp O94855-2 SC24D_HUMAN | 0.10474777 | 0          |
| sp P05388 RLA0_HUMAN    | 0.10546684 | 0.35795313 |
| sp P36542 ATPG_HUMAN    | 0.10590744 | 0.656254   |
| sp P23229-4 ITA6_HUMAN  | 0.10641861 | 0.7827403  |
| sp Q5K4L6 S27A3_HUMAN   | 0.10687447 | 0.35795313 |
| sp P48449-3 ERG7_HUMAN  | 0.10794449 | 0.1342476  |
| sp Q9NQG5 RPR1B_HUMAN   | 0.10852242 | 0.2178309  |
| sp P06681-3 CO2_HUMAN   | 0.10959435 | 0.56808305 |
| sp P22061-2 PIMT_HUMAN  | 0.10973358 | 0.40256184 |
| sp Q9Y6C2 EMIL1_HUMAN   | 0.10983658 | 1.2911863  |
| sp P05387 RLA2_HUMAN    | 0.10986137 | 0.7827403  |
| sp Q6PCB0 VWA1_HUMAN    | 0.11120796 | 0.2178309  |
| sp P30512 1A29_HUMAN    | 0.11186218 | 0.09894868 |
| sp O60825-2 F262_HUMAN  | 0.11293602 | 0.656254   |
| sp P61970 NTF2_HUMAN    | 0.11328125 | 0.91601294 |
| sp Q3LXA3 TKFC_HUMAN    | 0.11334801 | 0.57057804 |
| sp O60547-2 GMDS_HUMAN  | 0.1144104  | 0          |
| sp Q9Y5Z4 HEBP2_HUMAN   | 0.11450577 | 0.35795313 |
| sp P55145 MANF_HUMAN    | 0.11548233 | 0.7827403  |
| sp Q12882 DPYD_HUMAN    | 0.11603546 | 0.45033538 |

|                          |            |            |
|--------------------------|------------|------------|
| sp P61006 RAB8A_HUMAN    | 0.11608315 | 0          |
| sp Q02952-2 AKA12_HUMAN  | 0.1162796  | 0.7827403  |
| sp P62910 RL32_HUMAN     | 0.11692619 | 0.312067   |
| sp Q9UNS2 CSN3_HUMAN     | 0.11805916 | 0.656254   |
| sp Q9NRN5-2 OLFL3_HUMAN  | 0.11837769 | 0.7173901  |
| sp P08294 SODE_HUMAN     | 0.11995316 | 0.7217418  |
| sp P30519 HMOX2_HUMAN    | 0.1201191  | 0.7827403  |
| sp Q9UK22 FBX2_HUMAN     | 0.12110615 | 0.45033538 |
| sp P21810 PGS1_HUMAN     | 0.12182808 | 0.9402636  |
| sp O60256-3 KPRB_HUMAN   | 0.12416267 | 0.45033538 |
| sp P14618-2 KPYM_HUMAN   | 0.12431908 | 0.2178309  |
| sp P24666 PPAC_HUMAN     | 0.1252861  | 0.19149946 |
| sp O43396 TXNL1_HUMAN    | 0.125988   | 0.45033538 |
| sp P18084 ITB5_HUMAN     | 0.12625122 | 0.7827403  |
| sp Q93084-2 AT2A3_HUMAN  | 0.12639618 | 0.19149946 |
| sp O60716-14 CTND1_HUMAN | 0.12645721 | 0.5204253  |
| sp Q96P70 IPO9_HUMAN     | 0.12784481 | 0.1342476  |
| sp Q15833-2 STXB2_HUMAN  | 0.12936687 | 0.19149946 |
| sp P0DJ18 SAA1_HUMAN     | 0.13446045 | 0          |
| sp Q86VS8 HOOK3_HUMAN    | 0.13574219 | 0.45033538 |
| sp Q92930 RAB8B_HUMAN    | 0.13642502 | 0.656254   |
| sp P22102 PUR2_HUMAN     | 0.13648415 | 0.35193655 |
| sp Q86WV6 STING_HUMAN    | 0.13687515 | 0.5204253  |
| sp Q30154 DRB5_HUMAN     | 0.13705444 | 0          |
| sp P53992 SC24C_HUMAN    | 0.13735199 | 0.40256184 |
| sp Q9P2B2 FPRP_HUMAN     | 0.13742256 | 0.9533461  |
| sp Q9HCN8 SDF2L_HUMAN    | 0.13813972 | 1.1932944  |
| sp O15498-2 YKT6_HUMAN   | 0.13910103 | 0.7827403  |
| sp Q15819 UB2V2_HUMAN    | 0.13981819 | 0.656254   |
| sp Q93009-3 UBP7_HUMAN   | 0.14267921 | 0          |
| sp P31937 3HIDH_HUMAN    | 0.14381409 | 1.1505735  |
| sp P55058 PLTP_HUMAN     | 0.14539146 | 1.1932944  |
| sp P39019 RS19_HUMAN     | 0.14544106 | 0.5204253  |
| sp Q9UJS0-2 CMC2_HUMAN   | 0.14588928 | 0          |
| sp Q9Y3D6 FIS1_HUMAN     | 0.14678669 | 0.7061832  |
| sp P15090 FABP4_HUMAN    | 0.14810753 | 1.1687785  |
| sp Q15046 SYK_HUMAN      | 0.14833832 | 0.656254   |
| sp Q9Y265 RUVB1_HUMAN    | 0.15053368 | 0.7740364  |
| sp P52888 THOP1_HUMAN    | 0.15211105 | 0.19149946 |
| sp Q9NP79 VTA1_HUMAN     | 0.15211582 | 0.35795313 |
| sp Q00796 DHSO_HUMAN     | 0.155159   | 1.1505735  |
| sp Q14767 LTBP2_HUMAN    | 0.15539742 | 1.1458259  |
| sp P29400-2 CO4A5_HUMAN  | 0.15546417 | 0          |
| sp P62857 RS28_HUMAN     | 0.15738487 | 0.91601294 |
| sp P56537 IF6_HUMAN      | 0.15920448 | 0.37060758 |

|                          |            |            |
|--------------------------|------------|------------|
| sp P80188 NGAL_HUMAN     | 0.15976715 | 1.214352   |
| sp P35637-2 FUS_HUMAN    | 0.1614418  | 0.7827403  |
| sp O76074-2 PDE5A_HUMAN  | 0.16346455 | 0.43633315 |
| sp P62070-4 RRAS2_HUMAN  | 0.16403008 | 0.656254   |
| sp O94804 STK10_HUMAN    | 0.16622353 | 0.7827403  |
| sp P21589-2 5NTD_HUMAN   | 0.16637993 | 1.1932944  |
| sp P06132 DCUP_HUMAN     | 0.16862679 | 0.17319627 |
| sp P30046 DOPD_HUMAN     | 0.17041397 | 0.7827403  |
| sp Q13310-2 PABP4_HUMAN  | 0.17392159 | 0.656254   |
| sp P01112 RASH_HUMAN     | 0.17481804 | 0.656254   |
| sp O95833 CLIC3_HUMAN    | 0.17572594 | 0.91601294 |
| sp O14745 NHRF1_HUMAN    | 0.17724419 | 0.35795313 |
| sp Q6P4A8 PLBL1_HUMAN    | 0.18112183 | 0          |
| sp Q16787-3 LAMA3_HUMAN  | 0.18172073 | 0.656254   |
| sp Q7L5N1 CSN6_HUMAN     | 0.18235588 | 0.7827403  |
| sp P02748 CO9_HUMAN      | 0.18354034 | 1.1955373  |
| sp Q9GZT8 NIF3L_HUMAN    | 0.18515587 | 0.45033538 |
| sp P00736 C1R_HUMAN      | 0.18560886 | 1.1505735  |
| sp P05109 S10A8_HUMAN    | 0.19008064 | 0.633381   |
| sp P57737-4 CORO7_HUMAN  | 0.19169521 | 0.19149946 |
| sp P07360 CO8G_HUMAN     | 0.19398499 | 0.45033538 |
| sp P00441 SODC_HUMAN     | 0.19678497 | 1.1791906  |
| sp Q06033-2 ITIH3_HUMAN  | 0.19892693 | 0.45033538 |
| sp Q08378 GOGA3_HUMAN    | 0.19901562 | 0.5204253  |
| sp P30711 GSTT1_HUMAN    | 0.1994381  | 0.91601294 |
| sp P52758 RIDA_HUMAN     | 0.20117378 | 0.7827403  |
| sp Q16643-3 DREB_HUMAN   | 0.20122337 | 0.45563722 |
| sp Q14651 PLSI_HUMAN     | 0.2027111  | 0          |
| sp P09871 C1S_HUMAN      | 0.20284843 | 0.2178309  |
| sp P23142-4 FBLN1_HUMAN  | 0.20300579 | 0.656254   |
| sp P40261 NNMT_HUMAN     | 0.20323372 | 0.91601294 |
| sp P63151-2 2ABA_HUMAN   | 0.20518303 | 0          |
| sp O75347 TBCA_HUMAN     | 0.21367264 | 0.5204253  |
| sp O75964 ATP5L_HUMAN    | 0.21479797 | 1.1932944  |
| sp P27918 PROP_HUMAN     | 0.21665764 | 1.1932944  |
| sp P60891 PRPS1_HUMAN    | 0.21702576 | 0.656254   |
| sp P02753 RET4_HUMAN     | 0.21958923 | 1.2773042  |
| sp P01743 HV146_HUMAN    | 0.22031784 | 0.656254   |
| sp P12814 ACTN1_HUMAN    | 0.22034264 | 0          |
| sp Q9BX97 PLVAP_HUMAN    | 0.22039795 | 0.19149946 |
| sp Q9Y6A4 CFA20_HUMAN    | 0.22179794 | 0.19149946 |
| sp O94979-10 SC31A_HUMAN | 0.22183514 | 0.80804527 |
| sp P09493-5 TPM1_HUMAN   | 0.22377205 | 1.1932944  |
| sp P42785-2 PCP_HUMAN    | 0.22517395 | 1.2773042  |
| sp Q9UNH7-2 SNX6_HUMAN   | 0.22527504 | 0          |

|                           |            |            |
|---------------------------|------------|------------|
| sp Q92598-2 HS105_HUMAN   | 0.22595215 | 0.656254   |
| sp P35542 SAA4_HUMAN      | 0.22671127 | 1.1932944  |
| sp P31321 KAP1_HUMAN      | 0.2269268  | 0.656254   |
| sp Q13867 BLMH_HUMAN      | 0.22817802 | 0.19149946 |
| sp O00233-2 PSMD9_HUMAN   | 0.22914505 | 0.45033538 |
| sp Q14141-2 SEPT6_HUMAN   | 0.2311058  | 0.656254   |
| sp P61018-2 RAB4B_HUMAN   | 0.2346611  | 0.656254   |
| sp P07358 CO8B_HUMAN      | 0.23997593 | 0.8983557  |
| sp P62269 RS18_HUMAN      | 0.24016953 | 0.6298893  |
| sp P22352 GPX3_HUMAN      | 0.24386597 | 1.1505735  |
| sp Q14192 FHL2_HUMAN      | 0.24930954 | 0.8272904  |
| sp P01780 HV307_HUMAN     | 0.25279808 | 0.656254   |
| sp P09012 SNRPA_HUMAN     | 0.26445007 | 1.1932944  |
| sp O14791-2 APOL1_HUMAN   | 0.26728344 | 0.7827403  |
| sp P50148 GNAQ_HUMAN      | 0.2709179  | 0.6298893  |
| sp Q15404 RSU1_HUMAN      | 0.27944183 | 0.656254   |
| sp P42285 MTREX_HUMAN     | 0.28337288 | 0.19149946 |
| sp P48741 HSP77_HUMAN     | 0.28487587 | 0.656254   |
| sp Q15149-9 PLEC_HUMAN    | 0.2925415  | 0.656254   |
| sp Q04695 K1C17_HUMAN     | 0.2936859  | 0.656254   |
| sp Q96HN2-2 SAHH3_HUMAN   | 0.29668045 | 0.656254   |
| sp P54577 SYYC_HUMAN      | 0.29676437 | 0.1558116  |
| sp P01019 ANGT_HUMAN      | 0.29808235 | 0.8983557  |
| sp Q9Y5K5-2 UCHL5_HUMAN   | 0.29846954 | 1.0301651  |
| sp P16144-2 ITB4_HUMAN    | 0.30443668 | 1.1932944  |
| sp O94919 ENDD1_HUMAN     | 0.30462074 | 0          |
| sp Q5TZA2 CROCC_HUMAN     | 0.30473137 | 0.8983557  |
| sp P54802 ANAG_HUMAN      | 0.30673218 | 0.7827403  |
| sp Q9P1F3 ABRAL_HUMAN     | 0.30845833 | 0.656254   |
| sp Q96PD5-2 PGRP2_HUMAN   | 0.32795906 | 1.0485198  |
| sp A1L4H1 SRCRL_HUMAN     | 0.33002186 | 0.35795313 |
| sp P23219-2 PGH1_HUMAN    | 0.33017159 | 0.8983557  |
| sp A0A0C4DH38 HV551_HUMAN | 0.3303833  | 1.1932944  |
| sp O15296 LX15B_HUMAN     | 0.3349247  | 0.7588735  |
| sp Q92905 CSN5_HUMAN      | 0.34166622 | 1.1932944  |
| sp P12814-2 ACTN1_HUMAN   | 0.34252167 | 1.1932944  |
| sp Q15063-3 POSTN_HUMAN   | 0.34417725 | 1.1932944  |
| sp P0DOX2 IGA2_HUMAN      | 0.34596443 | 1.1505735  |
| sp Q66K74-2 MAP1S_HUMAN   | 0.35225964 | 1.1932944  |
| sp Q08379 GOGA2_HUMAN     | 0.35415077 | 1.1932944  |
| sp P01591 IGJ_HUMAN       | 0.355011   | 1.1932944  |
| sp Q8TAQ2-2 SMRC2_HUMAN   | 0.35608673 | 1.0301651  |
| sp Q13976-2 KGP1_HUMAN    | 0.3590355  | 0.656254   |
| sp P62913-2 RL11_HUMAN    | 0.36660767 | 0.7827403  |
| sp Q9GZP4-2 PITH1_HUMAN   | 0.3700676  | 1.1932944  |

|                           |            |            |
|---------------------------|------------|------------|
| sp P02751-15 FINC_HUMAN   | 0.37564468 | 0.656254   |
| sp P63267 ACTH_HUMAN      | 0.37917328 | 0.656254   |
| sp P05155-2 IC1_HUMAN     | 0.38098907 | 1.1932944  |
| sp A0A0C4DH29 HV103_HUMAN | 0.383152   | 0.656254   |
| sp P0DP03 HV335_HUMAN     | 0.3840847  | 1.1932944  |
| sp Q9NY15 STAB1_HUMAN     | 0.38669205 | 1.1932944  |
| sp P02747 C1QC_HUMAN      | 0.3869419  | 1.1932944  |
| sp P20339-2 RAB5A_HUMAN   | 0.38766193 | 0.656254   |
| sp Q7Z4H8 PLGT3_HUMAN     | 0.38907623 | 0.656254   |
| sp P0DOX7 IGK_HUMAN       | 0.3927765  | 1.2095301  |
| sp P12235 ADT1_HUMAN      | 0.39878845 | 0.656254   |
| sp P63027 VAMP2_HUMAN     | 0.4085579  | 1.1932944  |
| sp Q04446 GLGB_HUMAN      | 0.41527843 | 0.1342476  |
| sp P02763 A1AG1_HUMAN     | 0.41578674 | 1.2773042  |
| sp P01782 HV309_HUMAN     | 0.43793678 | 0.656254   |
| sp P48059-3 LIMS1_HUMAN   | 0.4416027  | 0.656254   |
| sp Q9H6S3 ES8L2_HUMAN     | 0.4497528  | 0.7827403  |
| sp P0COL4 CO4A_HUMAN      | 0.45576668 | 1.1932944  |
| sp P02746 C1QB_HUMAN      | 0.45635033 | 1.1932944  |
| sp P13928 ANXA8_HUMAN     | 0.45711136 | 1.1932944  |
| sp Q7Z7G0 TARSH_HUMAN     | 0.46326828 | 0.19149946 |
| sp Q15437 SC23B_HUMAN     | 0.46767998 | 0.656254   |
| sp P54108-2 CRIS3_HUMAN   | 0.470356   | 0.656254   |
| sp P01624 KV315_HUMAN     | 0.4849682  | 1.1932944  |
| sp Q15063-2 POSTN_HUMAN   | 0.51055145 | 0.656254   |
| sp A0A0C4DH25 KVD20_HUMAN | 0.51397324 | 0.656254   |
| sp P12111-4 CO6A3_HUMAN   | 0.52407646 | 0.656254   |
| sp P25685-2 DNJB1_HUMAN   | 0.55208397 | 1.1932944  |
| sp P0COL5 CO4B_HUMAN      | 0.5610542  | 1.1932944  |
| sp P01619 KV320_HUMAN     | 0.56131554 | 0.656254   |
| sp P28161 GSTM2_HUMAN     | 0.5817566  | 0.656254   |
| sp Q92599-3 SEPT8_HUMAN   | 0.62290764 | 1.1932944  |
| sp P08185 CBG_HUMAN       | 0.6303673  | 1.1932944  |
| sp Q15323 K1H1_HUMAN      | 0.6433525  | 0.656254   |
| sp Q06828 FMOD_HUMAN      | 0.65532494 | 1.1932944  |
| sp Q96HY6 DDR GK_HUMAN    | 0.67363167 | 0.656254   |
| sp Q687X5 STEA4_HUMAN     | 0.6975393  | 1.1932944  |
| sp Q9NSK0-5 KLC4_HUMAN    | 0.70474243 | 0.656254   |
| sp P02533 K1C14_HUMAN     | 0.75392437 | 1.1932944  |
| sp A0A0C4DH41 HV461_HUMAN | 0.76514053 | 0.656254   |
| sp P06753-6 TPM3_HUMAN    | 0.78310966 | 0.656254   |
| sp O94788-3 AL1A2_HUMAN   | 0.80875206 | 0.656254   |
| sp P02461 CO3A1_HUMAN     | 0.8380413  | 1.1932944  |
| sp P14207 FOLR2_HUMAN     | 0.83867264 | 0.656254   |
| sp P30613-2 KPYR_HUMAN    | 0.84132576 | 0.656254   |

|                           |            |            |
|---------------------------|------------|------------|
| sp P08779 K1C16_HUMAN     | 0.85953236 | 1.1932944  |
| sp P01834 IGKC_HUMAN      | 0.8696346  | 1.1932944  |
| sp P06310 KV230_HUMAN     | 0.9070759  | 0.656254   |
| sp P69891 HBG1_HUMAN      | 0.90751266 | 0.656254   |
| sp P23083 HV102_HUMAN     | 0.90756416 | 0.656254   |
| sp A0A075B6P5 KV228_HUMAN | 0.9130535  | 0.656254   |
| sp P47895 AL1A3_HUMAN     | 0.93656445 | 0.656254   |
| sp P00738 HPT_HUMAN       | 0.9758568  | 0.656254   |
| sp Q03591 FHR1_HUMAN      | 1.2127085  | 1.1932944  |
| sp Q9BTE3-2 MCMBP_HUMAN   | 1.2362146  | 0.19149946 |
| sp P11166 GTR1_HUMAN      | 1.3974476  | 1.1932944  |
| sp P69892 HBG2_HUMAN      | 1.5076599  | 0.656254   |
